# Supplementary material for: Drought Stress Stimulates the Terpenoid Backbone and Triterpenoid Biosynthesis Pathway to Promote the Synthesis of Saikosaponin in Bupleurum chinense DC. Roots
Source: MDPI journal article supplement (doi:10.3390/molecules27175470), 2022-08-25
Supplement: s1 [file s1]

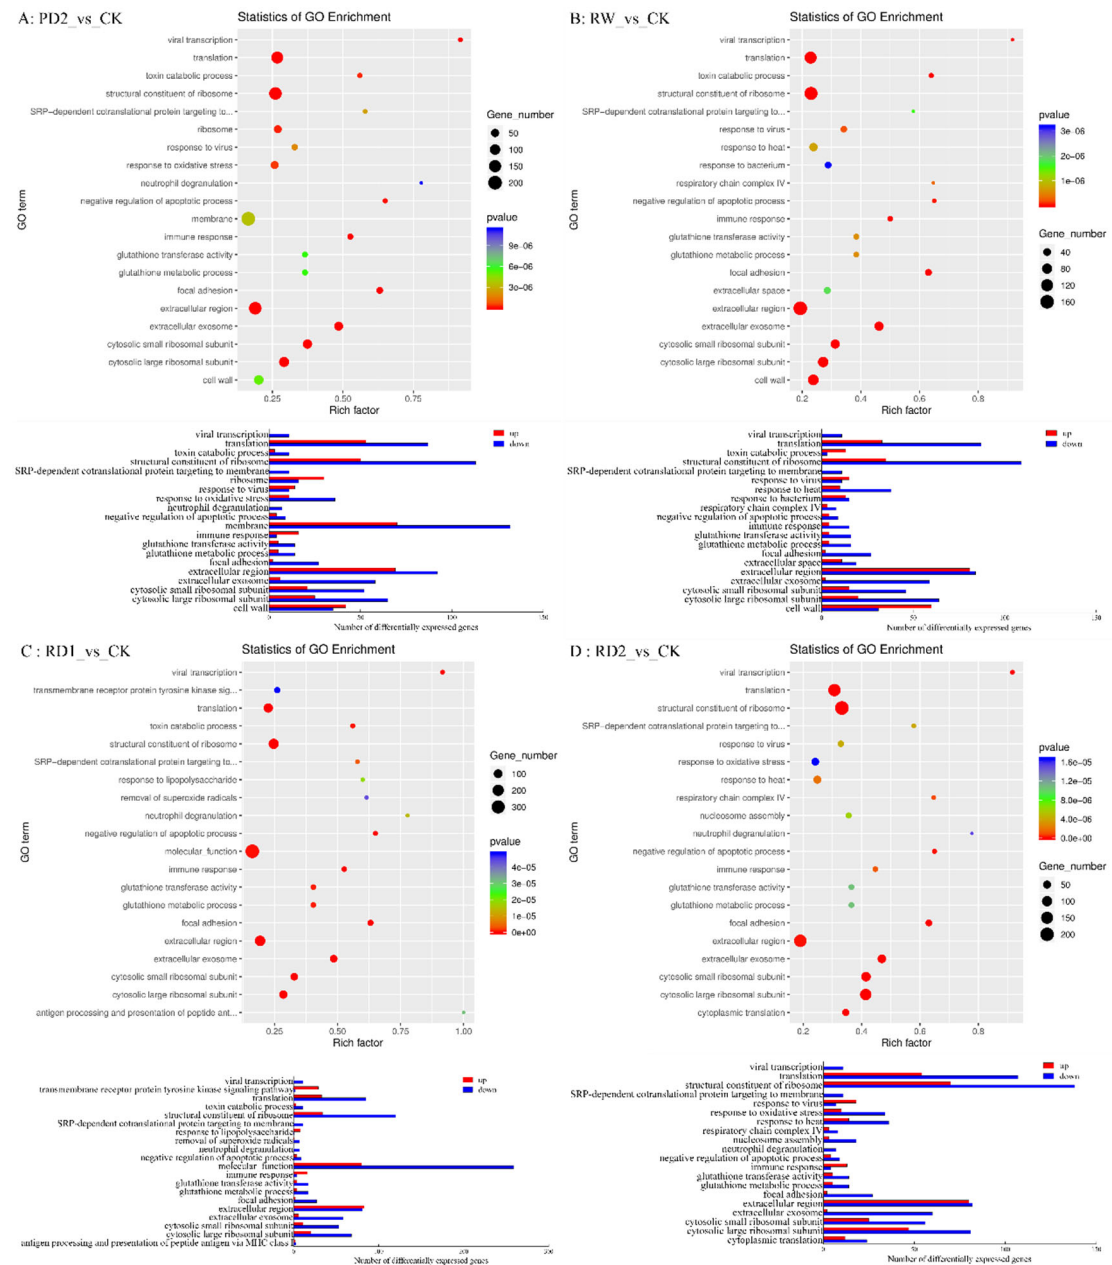

Figure S1. GO enrichment analysis of differentially expressed genes (GO enrichment scatterplot and GO classification of up- and down-regulated differentially expressed genes). (A) PD2 vs CK. (B) RW vs CK. (C) RD1 vs CK. (D) RD2 vs CK.
