# Supplementary material for: Drought Stress Stimulates the Terpenoid Backbone and Triterpenoid Biosynthesis Pathway to Promote the Synthesis of Saikosaponin in Bupleurum chinense DC. Roots
Source: Molecules. 2022 Aug 25;27(17):5470. doi: 10.3390/molecules27175470 (PMC9457724; doi:10.3390/molecules27175470)
Supplement: Supplementary file 1 [file molecules-27-05470-s001.zip]

Archive with 9 entries (9 files):
- Supplementary Material. Figure S1.pdf
- Supplementary Material. Figure S2.pdf
- Supplementary Material. Figure S3.pdf
- Supplementary Material. Table S1. NR_annotation.xlsx
- Supplementary Material. Table S2. eggNOG_annotation.xlsx
- Supplementary Material. Table S3. GO_annotation.xlsx
- Supplementary Material. Table S4. Pfam_annotation.xlsx
- Supplementary Material. Table S5. swissprot_annotation.xlsx
- Supplementary Material. Table S6. KEGG_annotation.xlsx
