# Supplementary material for: Drought Stress Stimulates the Terpenoid Backbone and Triterpenoid Biosynthesis Pathway to Promote the Synthesis of Saikosaponin in Bupleurum chinense DC. Roots
Source: Molecules. 2022 Aug 25;27(17):5470. doi: 10.3390/molecules27175470 (PMC9457724; doi:10.3390/molecules27175470)
Supplement: Supplementary file 1 [file molecules-27-05470-s001.zip › Supplementary Material. Table S1. NR_annotation.xlsx]

## Sheet: Sheet1
Query	NR_hit	NR_description	NR_species	NR_identity	NR_evalue
TRINITY_DN10009_c0_g1	KZM99264.1	hypothetical protein DCAR_013374 [Daucus carota subsp. sativus]	Daucus_carota	86.4	1.7e-23
TRINITY_DN1000_c0_g1	EAY74086.1	hypothetical protein OsI_01974 [Oryza sativa Indica Group]	Oryza_sativa	100	1.8e-31
TRINITY_DN10012_c0_g1	BAS81018.1	Os02g0759700, partial [Oryza sativa Japonica Group]	Oryza_sativa	100	2.6e-36
TRINITY_DN10015_c0_g1	BAS83477.1	Os03g0271200, partial [Oryza sativa Japonica Group]	Oryza_sativa	100	2.9e-48
TRINITY_DN1002_c0_g1	BAA84998.1	DA-3 [Trifolium repens]	Trifolium_repens	52.6	8.2e-119
TRINITY_DN10036_c0_g1	KRH29261.1	hypothetical protein GLYMA_11G105900 [Glycine max]	Glycine_max	100	6e-10
TRINITY_DN10037_c0_g1	XP_015636673.1	protein argonaute 4B [Oryza sativa Japonica Group]	Oryza_sativa	100	3.7e-41
TRINITY_DN10055_c0_g1	VDD29959.1	unnamed protein product [Brassica oleracea]	Brassica_oleracea	62.5	2.8e-17
TRINITY_DN10059_c0_g1	EEC79634.1	hypothetical protein OsI_20851 [Oryza sativa Indica Group]	Oryza_sativa	100	1e-42
TRINITY_DN1007_c0_g1	XP_017217605.1	PREDICTED: GDSL esterase/lipase At2g23540 [Daucus carota subsp. sativus]	Daucus_carota	91.9	2.6e-201
TRINITY_DN10134_c0_g1	XP_017216254.1	PREDICTED: anaphase-promoting complex subunit 13 [Daucus carota subsp. sativus]	Daucus_carota	74.2	5.3e-18
TRINITY_DN10140_c0_g1	XP_003544177.1	delta-1-pyrroline-5-carboxylate synthase [Glycine max]	Glycine_max	100	6.9e-31
TRINITY_DN10146_c0_g1	XP_017257073.1	PREDICTED: uncharacterized protein LOC108226599 [Daucus carota subsp. sativus]	Daucus_carota	87.7	4.6e-43
TRINITY_DN1014_c0_g1	XP_015637361.1	uncharacterized protein At5g02240 [Oryza sativa Japonica Group]	Oryza_sativa	100	1.8e-08
TRINITY_DN10158_c0_g1	XP_015617627.1	probable phosphoribosylformylglycinamidine synthase, chloroplastic/mitochondrial [Oryza sativa Japonica Group]	Oryza_sativa	98.8	4.3e-40
TRINITY_DN1015_c0_g1	YP_009532834.1	hypothetical protein (mitochondrion) [Glycine soja]	Glycine_soja	100	1.8e-31
TRINITY_DN10165_c0_g1	XP_027917421.1	probable small nuclear ribonucleoprotein F [Vigna unguiculata]	Vigna_unguiculata	100	3e-23
TRINITY_DN10165_c0_g2	XP_006848141.1	probable small nuclear ribonucleoprotein F [Amborella trichopoda]	Amborella_trichopoda	88.1	4.6e-28
TRINITY_DN10169_c0_g1	KHM99758.1	Proteasome subunit alpha type-1-A [Glycine soja]	Glycine_soja	100	2.4e-31
TRINITY_DN10174_c0_g1	XP_015631115.1	LRR receptor-like serine/threonine-protein kinase FEI 1 isoform X2 [Oryza sativa Japonica Group]	Oryza_sativa	100	9.2e-37
TRINITY_DN10180_c0_g1	RZB83105.1	14-3-3-like protein D isoform B [Glycine soja]	Glycine_soja	100	9.6e-30
TRINITY_DN10186_c0_g1	XP_024977083.1	protein ECERIFERUM 26-like [Cynara cardunculus var. scolymus]	Cynara_cardunculus	59.1	4.3e-14
TRINITY_DN10189_c0_g2	BAS95640.1	Os05g0592450 [Oryza sativa Japonica Group]	Oryza_sativa	100	6.3e-35
TRINITY_DN1018_c0_g1	XP_005646711.1	hypothetical protein COCSUDRAFT_36935 [Coccomyxa subellipsoidea C-169]	Coccomyxa_subellipsoidea	77.8	8.8e-28
TRINITY_DN10196_c0_g1	ACU19047.1	unknown [Glycine max]	Glycine_max	100	1e-34
TRINITY_DN10212_c0_g1	XP_017256200.1	PREDICTED: probable carboxylesterase 5 [Daucus carota subsp. sativus]	Daucus_carota	69.9	2.3e-19
TRINITY_DN10212_c0_g2	XP_017256200.1	PREDICTED: probable carboxylesterase 5 [Daucus carota subsp. sativus]	Daucus_carota	65.2	6.4e-21
TRINITY_DN10236_c0_g1	RZC29026.1	Bifunctional 3-dehydroquinate dehydratase/shikimate dehydrogenase, chloroplastic isoform C [Glycine soja]	Glycine_soja	100	2.1e-36
TRINITY_DN10261_c0_g1	XP_003531564.1	cytochrome b-c1 complex subunit 6 [Glycine max]	Glycine_max	100	1.8e-36
TRINITY_DN10275_c0_g1	EAZ21575.1	hypothetical protein OsJ_05203 [Oryza sativa Japonica Group]	Oryza_sativa	100	1.7e-29
TRINITY_DN10281_c0_g1	XP_015650814.1	calcium-dependent protein kinase 1 [Oryza sativa Japonica Group]	Oryza_sativa	100	7.2e-34
TRINITY_DN102_c0_g1	KZM86021.1	hypothetical protein DCAR_026557 [Daucus carota subsp. sativus]	Daucus_carota	55.4	2.3e-12
TRINITY_DN10300_c0_g1	XP_015649818.1	organelle RRM domain-containing protein 2, mitochondrial [Oryza sativa Japonica Group]	Oryza_sativa	98.8	4e-42
TRINITY_DN10307_c0_g1	XP_021841152.1	uncharacterized protein LOC110781236, partial [Spinacia oleracea]	Spinacia_oleracea	64.3	5.2e-18
TRINITY_DN10309_c0_g1	PLY89237.1	hypothetical protein LSAT_5X169241 [Lactuca sativa]	Lactuca_sativa	79.2	3.9e-13
TRINITY_DN10339_c0_g1	ABG21969.1	expressed protein [Oryza sativa Japonica Group]	Oryza_sativa	100	5.6e-40
TRINITY_DN10345_c0_g1	RZB91325.1	hypothetical protein D0Y65_023651 [Glycine soja]	Glycine_soja	100	4.7e-39
TRINITY_DN10359_c0_g1	XP_010275961.1	PREDICTED: 26S protease regulatory subunit 6A homolog [Nelumbo nucifera]	Nelumbo_nucifera	82.4	3.8e-28
TRINITY_DN10385_c0_g1	XP_017221760.1	PREDICTED: protein SLOW GREEN 1, chloroplastic-like [Daucus carota subsp. sativus]	Daucus_carota	55.8	2.4e-08
TRINITY_DN10398_c0_g2	XP_024960822.1	zinc finger BED domain-containing protein RICESLEEPER 2-like [Cynara cardunculus var. scolymus]	Cynara_cardunculus	57.4	4.4e-10
TRINITY_DN103_c0_g1	YP_008802544.1	NADH dehydrogenase subunit 3 (mitochondrion) [Monomastix sp. OKE-1]	Monomastix_sp._OKE-1	58.1	4.5e-11
TRINITY_DN10400_c0_g2	XP_015624179.1	14 kDa proline-rich protein DC2.15 [Oryza sativa Japonica Group]	Oryza_sativa	93.6	2.3e-10
TRINITY_DN10406_c0_g1	XP_017240326.1	PREDICTED: uncharacterized protein LOC108213095 [Daucus carota subsp. sativus]	Daucus_carota	53.4	1.5e-95
TRINITY_DN10415_c0_g1	RZB97852.1	Nuclear poly(A) polymerase 2 isoform D [Glycine soja]	Glycine_soja	100	2.7e-34
TRINITY_DN1042_c0_g1	BAJ85104.1	predicted protein [Hordeum vulgare subsp. vulgare]	Hordeum_vulgare	79.5	1.8e-26
TRINITY_DN1045_c0_g1	BAT04105.1	Os08g0180100, partial [Oryza sativa Japonica Group]	Oryza_sativa	100	6.6e-44
TRINITY_DN1048_c0_g1	PWA52766.1	Retrovirus-related Pol polyprotein from transposon TNT 1-94 [Artemisia annua]	Artemisia_annua	54.5	1.3e-13
TRINITY_DN10494_c0_g1	XP_015640237.1	patellin-3 [Oryza sativa Japonica Group]	Oryza_sativa	100	5.4e-19
TRINITY_DN10538_c0_g1	ACG24489.1	60S ribosomal protein L7a [Zea mays]	Zea_mays	67.9	2.9e-20
TRINITY_DN1055_c0_g1	XP_017246420.1	PREDICTED: O-glucosyltransferase rumi homolog [Daucus carota subsp. sativus]	Daucus_carota	87.3	4.5e-33
TRINITY_DN10575_c0_g1	XP_021716504.1	PHD finger protein ALFIN-LIKE 4-like [Chenopodium quinoa]	Chenopodium_quinoa	69.6	1.3e-25
TRINITY_DN10576_c0_g2	ABK26510.1	unknown [Picea sitchensis]	Picea_sitchensis	75.9	1.1e-18
TRINITY_DN10601_c0_g1	RZB98697.1	Solute carrier family 25 member 44 isoform C [Glycine soja]	Glycine_soja	100	3.1e-44
TRINITY_DN10614_c1_g1	XP_015629033.1	lamin-like protein [Oryza sativa Japonica Group]	Oryza_sativa	100	1.2e-39
TRINITY_DN10617_c0_g1	AAP06842.1	unknown protein [Oryza sativa Japonica Group]	Oryza_sativa	100	1.3e-20
TRINITY_DN10622_c0_g1	XP_015631988.1	transcriptional adapter ADA2 [Oryza sativa Japonica Group]	Oryza_sativa	100	4.8e-29
TRINITY_DN10622_c0_g2	XP_015631988.1	transcriptional adapter ADA2 [Oryza sativa Japonica Group]	Oryza_sativa	100	2.6e-36
TRINITY_DN10624_c0_g1	XP_015648130.1	transmembrane protein 120 homolog isoform X1 [Oryza sativa Japonica Group]	Oryza_sativa	100	4.6e-33
TRINITY_DN1065_c0_g1	RZB98511.1	Cytochrome P450 72A15 isoform B [Glycine soja]	Glycine_soja	100	1.1e-37
TRINITY_DN1067_c0_g1	PSC76461.1	NAD(P) mitochondrial [Micractinium conductrix]	Micractinium_conductrix	68.3	1.1e-07
TRINITY_DN10680_c0_g1	RZC15605.1	Signal peptide peptidase isoform A [Glycine soja]	Glycine_soja	100	1.1e-19
TRINITY_DN1068_c0_g1	AAQ56453.1	putative cytokinin inducibl protein [Oryza sativa Japonica Group]	Oryza_sativa	100	6.1e-35
TRINITY_DN106_c0_g1	XP_015641300.1	zinc finger protein STOP1 homolog [Oryza sativa Japonica Group]	Oryza_sativa	97.5	1.3e-12
TRINITY_DN10717_c0_g3	KDD76061.1	aconitate hydratase [Helicosporidium sp. ATCC 50920]	Helicosporidium_sp._ATCC_50920	81.2	7.4e-42
TRINITY_DN1072_c0_g1	EAY86110.1	hypothetical protein OsI_07480 [Oryza sativa Indica Group]	Oryza_sativa	100	9.4e-44
TRINITY_DN10764_c0_g1	PNR57710.1	hypothetical protein PHYPA_004704 [Physcomitrella patens]	Physcomitrella_patens	67.5	1.4e-25
TRINITY_DN10772_c0_g1	XP_017246860.1	PREDICTED: Werner Syndrome-like exonuclease [Daucus carota subsp. sativus]	Daucus_carota	72.2	1.2e-83
TRINITY_DN10778_c0_g1	RDX86651.1	putative protein, mitochondrial, partial [Mucuna pruriens]	Mucuna_pruriens	95.5	6e-27
TRINITY_DN10779_c0_g1	KZV15028.1	cationic amino acid transporter 4, vacuolar [Dorcoceras hygrometricum]	Dorcoceras_hygrometricum	53.6	9e-10
TRINITY_DN10796_c0_g1	RZB98929.1	DUF724 domain-containing protein 3 isoform A [Glycine soja]	Glycine_soja	100	8.2e-19
TRINITY_DN10809_c0_g1	KZN11489.1	hypothetical protein DCAR_004145 [Daucus carota subsp. sativus]	Daucus_carota	65.6	7e-26
TRINITY_DN10811_c0_g1	XP_017216533.1	PREDICTED: probable transmembrane ascorbate ferrireductase 3 [Daucus carota subsp. sativus]	Daucus_carota	86.7	1.7e-109
TRINITY_DN10812_c0_g1	XP_023922657.1	repressible alkaline phosphatase-like [Quercus suber]	Quercus_suber	49.4	1.3e-12
TRINITY_DN10815_c0_g1	XP_023874578.1	cytochrome c oxidase subunit 6B-like [Quercus suber]	Quercus_suber	50	1.5e-19
TRINITY_DN10830_c0_g1	XP_017232538.1	PREDICTED: protein disulfide-isomerase 5-1 [Daucus carota subsp. sativus]	Daucus_carota	73.5	7e-21
TRINITY_DN10832_c0_g1	XP_025880769.1	uncharacterized protein LOC112936012 [Oryza sativa Japonica Group]	Oryza_sativa	100	3e-18
TRINITY_DN10839_c0_g1	GAQ87443.1	GTP-binding protein [Klebsormidium nitens]	Klebsormidium_nitens	62.3	3.8e-22
TRINITY_DN10849_c0_g1	EEC76903.1	hypothetical protein OsI_15134 [Oryza sativa Indica Group]	Oryza_sativa	100	1.2e-32
TRINITY_DN1085_c0_g1	XP_015617849.1	1-acyl-sn-glycerol-3-phosphate acyltransferase PLS1 [Oryza sativa Japonica Group]	Oryza_sativa	100	5.8e-22
TRINITY_DN10871_c0_g1	XP_017251119.1	PREDICTED: uncharacterized protein LOC108221773 [Daucus carota subsp. sativus]	Daucus_carota	66.2	8.2e-28
TRINITY_DN10880_c0_g1	XP_017239928.1	PREDICTED: PRKR-interacting protein 1 [Daucus carota subsp. sativus]	Daucus_carota	85.3	2e-22
TRINITY_DN10886_c0_g1	KZM84647.1	hypothetical protein DCAR_027931 [Daucus carota subsp. sativus]	Daucus_carota	77.3	4.3e-14
TRINITY_DN10888_c0_g1	XP_017254675.1	PREDICTED: peptide methionine sulfoxide reductase-like [Daucus carota subsp. sativus]	Daucus_carota	85.9	9.6e-94
TRINITY_DN10889_c0_g2	XP_015622637.1	uncharacterized protein LOC9272617 [Oryza sativa Japonica Group]	Oryza_sativa	100	2.1e-17
TRINITY_DN1088_c0_g1	XP_009606254.1	PREDICTED: small nuclear ribonucleoprotein E-like [Nicotiana tomentosiformis]	Nicotiana_tomentosiformis	77.3	1.1e-22
TRINITY_DN10890_c0_g1	BAC66615.1	L-asparaginase [Glycine max]	Glycine_max	100	1.2e-30
TRINITY_DN10892_c0_g1	RZB66975.1	Heterogeneous nuclear ribonucleoprotein 1 isoform A [Glycine soja]	Glycine_soja	100	1.3e-35
TRINITY_DN10897_c0_g3	RZB99150.1	putative 1-deoxy-D-xylulose-5-phosphate synthase 2, chloroplastic isoform A [Glycine soja]	Glycine_soja	100	2e-24
TRINITY_DN10899_c0_g1	XP_015633214.1	transducin beta-like protein 2 [Oryza sativa Japonica Group]	Oryza_sativa	100	1.1e-08
TRINITY_DN10902_c0_g1	NP_001237743.1	uncharacterized protein LOC100306369 [Glycine max]	Glycine_max	96	4.2e-16
TRINITY_DN10904_c0_g1	XP_009116231.1	PREDICTED: ubiquitin-conjugating enzyme E2 14 [Brassica rapa]	Brassica_rapa	65.2	2.2e-21
TRINITY_DN10909_c0_g1	XP_017239065.1	PREDICTED: uncharacterized protein LOC108211865 [Daucus carota subsp. sativus]	Daucus_carota	75.2	4.9e-54
TRINITY_DN10910_c0_g1	OAE18840.1	hypothetical protein AXG93_2556s1110 [Marchantia polymorpha subsp. ruderalis]	Marchantia_polymorpha	52.1	7e-13
TRINITY_DN10928_c0_g1	RWR72599.1	Ribosomal protein L22e [Cinnamomum micranthum f. kanehirae]	Cinnamomum_micranthum	68.4	1.3e-33
TRINITY_DN10942_c0_g1	XP_017234527.1	PREDICTED: uncharacterized protein LOC108208504 [Daucus carota subsp. sativus]	Daucus_carota	68.4	1.7e-17
TRINITY_DN1098_c0_g1	XP_015634334.1	growth-regulating factor 3 isoform X3 [Oryza sativa Japonica Group]	Oryza_sativa	98.5	4.8e-29
TRINITY_DN10991_c0_g1	XP_019180368.1	PREDICTED: uncharacterized protein LOC109175549 [Ipomoea nil]	Ipomoea_nil	81.6	1.2e-15
TRINITY_DN11010_c0_g1	EEC70237.1	hypothetical protein OsI_01013 [Oryza sativa Indica Group]	Oryza_sativa	50.7	2.4e-06
TRINITY_DN11012_c0_g1	NP_001238685.1	uncharacterized protein LOC100306683 [Glycine max]	Glycine_max	100	1.6e-26
TRINITY_DN11014_c0_g1	XP_017233930.1	PREDICTED: uncharacterized protein LOC108207975 [Daucus carota subsp. sativus]	Daucus_carota	76.7	2.6e-43
TRINITY_DN11032_c0_g1	XP_022140896.1	splicing factor 3B subunit 1 [Momordica charantia]	Momordica_charantia	50	6.7e-07
TRINITY_DN11034_c0_g1	XP_017233337.1	PREDICTED: transmembrane protein 205 [Daucus carota subsp. sativus]	Daucus_carota	97.1	5.6e-113
TRINITY_DN1103_c0_g1	ACU17605.1	unknown [Glycine max]	Glycine_max	100	4.9e-32
TRINITY_DN11041_c0_g1	NP_001237529.1	uncharacterized protein LOC100499892 [Glycine max]	Glycine_max	100	6e-29
TRINITY_DN11045_c0_g1	XP_017228056.1	PREDICTED: upstream activation factor subunit UAF30-like isoform X2 [Daucus carota subsp. sativus]	Daucus_carota	80.8	5.8e-58
TRINITY_DN11059_c0_g1	RZB99782.1	Calcium-dependent protein kinase 19 isoform D [Glycine soja]	Glycine_soja	100	8.8e-10
TRINITY_DN11065_c0_g1	EAY81239.1	hypothetical protein OsI_36414 [Oryza sativa Indica Group]	Oryza_sativa	100	6.1e-39
TRINITY_DN11079_c0_g1	XP_017220856.1	PREDICTED: sm-like protein LSM36B [Daucus carota subsp. sativus]	Daucus_carota	97.8	2.9e-44
TRINITY_DN11100_c1_g1	AAM62680.1	unknown [Arabidopsis thaliana]	Arabidopsis_thaliana	100	9.6e-09
TRINITY_DN11104_c0_g1	XP_017251022.1	PREDICTED: uncharacterized protein LOC108221670 [Daucus carota subsp. sativus]	Daucus_carota	57.8	5.9e-19
TRINITY_DN11109_c0_g1	KZM92259.1	hypothetical protein DCAR_020376 [Daucus carota subsp. sativus]	Daucus_carota	59.3	2e-06
TRINITY_DN1110_c0_g1	BAS74412.1	Os01g0756900, partial [Oryza sativa Japonica Group]	Oryza_sativa	98.6	4.1e-26
TRINITY_DN11111_c0_g1	XP_017239580.1	PREDICTED: uncharacterized protein LOC108212366 [Daucus carota subsp. sativus]	Daucus_carota	76.3	1.1e-15
TRINITY_DN11144_c0_g1	XP_003545890.1	splicing factor 3B subunit 2 [Glycine max]	Glycine_max	100	2.9e-10
TRINITY_DN11148_c0_g1	EEC75115.1	hypothetical protein OsI_11295 [Oryza sativa Indica Group]	Oryza_sativa	100	6.4e-37
TRINITY_DN11176_c0_g1	EAY87182.1	hypothetical protein OsI_08583 [Oryza sativa Indica Group]	Oryza_sativa	100	4e-32
TRINITY_DN11176_c0_g2	EAZ24291.1	hypothetical protein OsJ_08043 [Oryza sativa Japonica Group]	Oryza_sativa	100	1e-29
TRINITY_DN11178_c0_g1	XP_015639243.1	branched-chain amino acid aminotransferase 2, chloroplastic isoform X1 [Oryza sativa Japonica Group]	Oryza_sativa	100	4.1e-41
TRINITY_DN11190_c0_g1	XP_010676986.1	PREDICTED: uncharacterized protein LOC104892696 [Beta vulgaris subsp. vulgaris]	Beta_vulgaris	81.7	7.9e-34
TRINITY_DN11191_c0_g1	KZN04393.1	hypothetical protein DCAR_005230 [Daucus carota subsp. sativus]	Daucus_carota	50.5	7.2e-23
TRINITY_DN1119_c0_g2	BAT05958.1	Os08g0484500, partial [Oryza sativa Japonica Group]	Oryza_sativa	100	5.4e-40
TRINITY_DN11215_c0_g1	AAS07179.1	putative proteasome maturation factor [Oryza sativa Japonica Group]	Oryza_sativa	100	5e-41
TRINITY_DN11265_c0_g1	XP_021772359.1	uncharacterized protein LOC110736418 [Chenopodium quinoa]	Chenopodium_quinoa	74.3	2.9e-24
TRINITY_DN11269_c0_g1	RZB79458.1	V-type proton ATPase subunit a3 isoform B [Glycine soja]	Glycine_soja	100	6.2e-08
TRINITY_DN1131_c0_g1	RZB63740.1	Integrin-linked protein kinase 1 isoform C [Glycine soja]	Glycine_soja	100	6.6e-41
TRINITY_DN11338_c0_g3	PNR41096.1	hypothetical protein PHYPA_018499 [Physcomitrella patens]	Physcomitrella_patens	47.9	1.7e-11
TRINITY_DN11396_c0_g1	XP_018848602.1	PREDICTED: mitochondrial import inner membrane translocase subunit TIM23-1-like [Juglans regia]	Juglans_regia	43.7	2e-06
TRINITY_DN11397_c0_g1	XP_023883604.1	elongation factor 1-beta-like [Quercus suber]	Quercus_suber	64.2	1.2e-25
TRINITY_DN11407_c0_g1	ACE76905.1	ethylene-responsive element binding factor 4 [Glycine max]	Glycine_max	100	3.1e-33
TRINITY_DN11439_c0_g1	NP_001239653.1	uncharacterized protein LOC100793862 [Glycine max]	Glycine_max	100	1.3e-29
TRINITY_DN1143_c0_g1	XP_017239249.1	PREDICTED: uncharacterized protein LOC108212030 [Daucus carota subsp. sativus]	Daucus_carota	69.7	9.9e-23
TRINITY_DN11441_c0_g1	XP_015643841.1	putative transcription elongation factor SPT5 homolog 1 [Oryza sativa Japonica Group]	Oryza_sativa	100	2.2e-32
TRINITY_DN1144_c0_g1	AAS89034.1	delta-1-pyrroline-5-carboxylate synthetase [Oryza sativa Japonica Group]	Oryza_sativa	100	9.5e-37
TRINITY_DN11459_c0_g1	XP_017228100.1	PREDICTED: uncharacterized mitochondrial protein AtMg00810-like [Daucus carota subsp. sativus]	Daucus_carota	82.2	2.4e-46
TRINITY_DN11470_c0_g1	XP_015648777.1	cyclin-dependent kinase B2-1 [Oryza sativa Japonica Group]	Oryza_sativa	100	1.2e-35
TRINITY_DN11503_c0_g1	XP_017238361.1	PREDICTED: ankyrin-1-like [Daucus carota subsp. sativus]	Daucus_carota	80.5	1.6e-28
TRINITY_DN11521_c0_g1	EAY99623.1	hypothetical protein OsI_21602 [Oryza sativa Indica Group]	Oryza_sativa	100	4.2e-37
TRINITY_DN11546_c0_g1	XP_015618220.1	acyl carrier protein 1, chloroplastic [Oryza sativa Japonica Group]	Oryza_sativa	100	1.6e-30
TRINITY_DN11581_c0_g1	RZC11362.1	Tobamovirus multiplication protein 2A isoform A [Glycine soja]	Glycine_soja	100	3.9e-38
TRINITY_DN11604_c0_g1	BAS76633.1	Os02g0114000, partial [Oryza sativa Japonica Group]	Oryza_sativa	100	2.6e-30
TRINITY_DN11620_c0_g1	ABR25688.1	gcip-interacting family protein-like, partial [Oryza sativa Indica Group]	Oryza_sativa	100	8.4e-38
TRINITY_DN11639_c0_g1	NP_001236566.1	uncharacterized protein LOC100500340 [Glycine max]	Glycine_max	100	6.7e-22
TRINITY_DN11640_c0_g1	XP_015637396.1	secretory carrier-associated membrane protein 3 [Oryza sativa Japonica Group]	Oryza_sativa	98.7	1.9e-37
TRINITY_DN11660_c0_g1	PIA28323.1	hypothetical protein AQUCO_07200169v1 [Aquilegia coerulea]	Aquilegia_coerulea	91.3	1.8e-40
TRINITY_DN11668_c0_g1	XP_001418675.1	predicted protein [Ostreococcus lucimarinus CCE9901]	Ostreococcus_sp._'lucimarinus'	66.2	9.3e-20
TRINITY_DN11670_c0_g1	GAU15432.1	hypothetical protein TSUD_44690 [Trifolium subterraneum]	Trifolium_subterraneum	45.8	5.5e-06
TRINITY_DN11676_c0_g1	BAS92920.1	Os05g0231700, partial [Oryza sativa Japonica Group]	Oryza_sativa	100	6.2e-33
TRINITY_DN11701_c0_g1	XP_009602099.1	PREDICTED: 60S ribosomal protein L9-1-like [Nicotiana tomentosiformis]	Nicotiana_tomentosiformis	41.5	1.8e-07
TRINITY_DN11704_c0_g1	AAM23252.1	Unknown protein [Oryza sativa Japonica Group]	Oryza_sativa	84.7	2.6e-28
TRINITY_DN11706_c0_g1	NP_001237443.1	uncharacterized protein LOC100499887 precursor [Glycine max]	Glycine_max	100	6e-36
TRINITY_DN11711_c0_g3	XP_020253074.1	zinc finger CCCH domain-containing protein 28-like isoform X1 [Asparagus officinalis]	Asparagus_officinalis	51.6	5e-14
TRINITY_DN11751_c0_g1	KZN09580.1	hypothetical protein DCAR_002236 [Daucus carota subsp. sativus]	Daucus_carota	80.6	3e-32
TRINITY_DN11773_c0_g1	XP_019266311.1	PREDICTED: translin-associated protein X isoform X1 [Nicotiana attenuata]	Nicotiana_attenuata	77.1	3.5e-114
TRINITY_DN11774_c0_g1	ACG48512.1	hypothetical protein [Zea mays]	Zea_mays	100	4.6e-57
TRINITY_DN11782_c0_g1	NP_001238193.2	putative expansin-like A2 precursor [Glycine max]	Glycine_max	100	5.9e-36
TRINITY_DN11804_c0_g1	XP_015645309.1	17kDa alpha-amylase/trypsin inhibitor 2 [Oryza sativa Japonica Group]	Oryza_sativa	100	2.4e-56
TRINITY_DN11815_c0_g1	XP_017258354.1	PREDICTED: auxin-induced protein 15A [Daucus carota subsp. sativus]	Daucus_carota	89.4	1.7e-47
TRINITY_DN11819_c0_g1	RWR94838.1	putative mitochondrial protein [Cinnamomum micranthum f. kanehirae]	Cinnamomum_micranthum	89.5	3.6e-46
TRINITY_DN11822_c0_g1	EAZ01136.1	hypothetical protein OsI_23165 [Oryza sativa Indica Group]	Oryza_sativa	100	5.3e-40
TRINITY_DN11847_c0_g1	AAN05517.1	unknown protein [Oryza sativa Japonica Group]	Oryza_sativa	100	1.1e-41
TRINITY_DN11856_c0_g2	XP_017239156.1	PREDICTED: random slug protein 5-like isoform X1 [Daucus carota subsp. sativus]	Daucus_carota	79.1	3.2e-25
TRINITY_DN11857_c0_g1	XP_023891488.1	LOB domain-containing protein 29-like [Quercus suber]	Quercus_suber	92.4	5.8e-30
TRINITY_DN11863_c0_g1	KZV14799.1	acetyl-coenzyme A synthetase, chloroplastic/glyoxysomal-like [Dorcoceras hygrometricum]	Dorcoceras_hygrometricum	42.9	2.2e-08
TRINITY_DN11873_c0_g1	NP_001235221.1	RIN4a protein [Glycine max]	Glycine_max	100	2.3e-11
TRINITY_DN11876_c0_g1	EPS62189.1	hypothetical protein M569_12604 [Genlisea aurea]	Genlisea_aurea	79.1	6.2e-55
TRINITY_DN11894_c0_g3	GBF95189.1	hypothetical protein Rsub_07904 [Raphidocelis subcapitata]	Raphidocelis_subcapitata	54.3	1.3e-11
TRINITY_DN11898_c0_g1	RZB81917.1	Annexin-like protein RJ4 isoform A [Glycine soja]	Glycine_soja	100	2.5e-44
TRINITY_DN11898_c1_g1	NP_001242031.1	uncharacterized protein LOC100784424 [Glycine max]	Glycine_max	100	3.3e-25
TRINITY_DN11926_c0_g1	NP_001238113.1	uncharacterized protein LOC100305623 [Glycine max]	Glycine_max	100	9.9e-36
TRINITY_DN11935_c0_g1	XP_017410066.1	PREDICTED: triosephosphate isomerase, chloroplastic [Vigna angularis]	Vigna_angularis	98.9	4.5e-43
TRINITY_DN11942_c0_g3	RZC14167.1	Phosphoethanolamine N-methyltransferase isoform C [Glycine soja]	Glycine_soja	100	3.2e-37
TRINITY_DN11953_c0_g1	XP_017240892.1	PREDICTED: scarecrow-like protein 32 [Daucus carota subsp. sativus]	Daucus_carota	86.4	6.2e-27
TRINITY_DN11965_c0_g1	XP_015612480.1	probable protein S-acyltransferase 7 [Oryza sativa Japonica Group]	Oryza_sativa	100	4e-31
TRINITY_DN11992_c0_g1	PIN27105.1	PolyC-binding proteins alphaCP-1 [Handroanthus impetiginosus]	Handroanthus_impetiginosus	70.7	2.3e-08
TRINITY_DN12011_c0_g1	EAY84650.1	hypothetical protein OsI_06022 [Oryza sativa Indica Group]	Oryza_sativa	100	5.7e-33
TRINITY_DN12016_c0_g2	EAZ00406.1	hypothetical protein OsI_22421 [Oryza sativa Indica Group]	Oryza_sativa	100	2.1e-25
TRINITY_DN12016_c0_g3	XP_023909560.1	ribonucleoside-diphosphate reductase small chain-like [Quercus suber]	Quercus_suber	79.7	5.6e-25
TRINITY_DN12036_c0_g1	BAT16332.1	Os12g0212100 [Oryza sativa Japonica Group]	Oryza_sativa	64.6	2.1e-12
TRINITY_DN12036_c0_g2	BAT16332.1	Os12g0212100 [Oryza sativa Japonica Group]	Oryza_sativa	70.2	3.6e-09
TRINITY_DN12082_c0_g2	XP_027345952.1	26S proteasome non-ATPase regulatory subunit 2 homolog A isoform X1 [Abrus precatorius]	Abrus_precatorius	100	3.2e-34
TRINITY_DN12098_c0_g1	BAG86806.1	unnamed protein product [Oryza sativa Japonica Group]	Oryza_sativa	100	5.6e-12
TRINITY_DN1209_c0_g1	KRH60004.1	hypothetical protein GLYMA_05G214000 [Glycine max]	Glycine_max	100	8.7e-38
TRINITY_DN12140_c0_g2	ACU19446.1	unknown [Glycine max]	Glycine_max	100	9.4e-23
TRINITY_DN12142_c0_g1	KZM86626.1	hypothetical protein DCAR_023760 [Daucus carota subsp. sativus]	Daucus_carota	88.2	6.3e-29
TRINITY_DN12145_c0_g1	XP_017244988.1	PREDICTED: pathogenesis-related protein PR-1-like [Daucus carota subsp. sativus]	Daucus_carota	80.8	1.3e-91
TRINITY_DN12153_c0_g1	XP_027903056.1	ATPase 11, plasma membrane-type-like [Vigna unguiculata]	Vigna_unguiculata	100	3.6e-35
TRINITY_DN12175_c0_g1	RZC12092.1	Endoplasmic reticulum-Golgi intermediate compartment protein 3 isoform B [Glycine soja]	Glycine_soja	100	3.8e-37
TRINITY_DN12176_c0_g1	EAY82409.1	hypothetical protein OsI_37623 [Oryza sativa Indica Group]	Oryza_sativa	100	4.5e-40
TRINITY_DN12192_c0_g1	KVH88011.1	Proteasome component (PCI) domain-containing protein [Cynara cardunculus var. scolymus]	Cynara_cardunculus	61.8	5.5e-18
TRINITY_DN12203_c0_g1	RZC10905.1	Protein NBR1-like isoform B [Glycine soja]	Glycine_soja	100	3.4e-38
TRINITY_DN12218_c0_g1	RZC22105.1	Calmodulin-binding protein 60 D isoform A [Glycine soja]	Glycine_soja	100	2.3e-31
TRINITY_DN12243_c0_g1	XP_017257478.1	PREDICTED: uncharacterized protein LOC108226993 [Daucus carota subsp. sativus]	Daucus_carota	55.1	1.4e-154
TRINITY_DN12247_c0_g1	RZB69943.1	CBL-interacting serine/threonine-protein kinase 11 [Glycine soja]	Glycine_soja	100	1.4e-50
TRINITY_DN1224_c0_g2	NP_001236587.1	tau class glutathione S-transferase [Glycine max]	Glycine_max	100	8.4e-62
TRINITY_DN1228_c0_g1	ABF99674.1	50S ribosomal protein L18, chloroplast precursor, putative, expressed [Oryza sativa Japonica Group]	Oryza_sativa	100	1.9e-14
TRINITY_DN12309_c0_g2	BAG49328.1	plastidial starch phosphorylase 1 [Oryza sativa Japonica Group]	Oryza_sativa	100	8.6e-37
TRINITY_DN12309_c0_g3	AAK16190.1	putative phosphorylase [Oryza sativa Japonica Group]	Oryza_sativa	100	5.5e-24
TRINITY_DN12327_c0_g1	PNT12887.1	hypothetical protein POPTR_011G111900 [Populus trichocarpa]	Populus_trichocarpa	49.2	1.7e-08
TRINITY_DN12337_c0_g1	RYQ81184.1	hypothetical protein Ahy_Scaffold1g107173 isoform A [Arachis hypogaea]	Arachis_hypogaea	100	1.2e-32
TRINITY_DN12337_c0_g3	XP_015620566.1	serine/threonine-protein kinase STY46 isoform X1 [Oryza sativa Japonica Group]	Oryza_sativa	100	7.2e-36
TRINITY_DN12350_c0_g2	KZM98033.1	hypothetical protein DCAR_014605 [Daucus carota subsp. sativus]	Daucus_carota	72.9	1.4e-24
TRINITY_DN12370_c0_g2	KRH61352.1	hypothetical protein GLYMA_04G042400 [Glycine max]	Glycine_max	100	1.1e-40
TRINITY_DN12388_c0_g2	RZB43452.1	VQ motif-containing protein 8, chloroplastic [Glycine soja]	Glycine_soja	100	3.5e-25
TRINITY_DN12393_c0_g1	CAH67738.1	H0522A01.9 [Oryza sativa]	Oryza_sativa	100	8.6e-44
TRINITY_DN12413_c0_g1	EAY83135.1	hypothetical protein OsI_38348 [Oryza sativa Indica Group]	Oryza_sativa	100	6.9e-35
TRINITY_DN12414_c0_g1	EEC80339.1	hypothetical protein OsI_22408 [Oryza sativa Indica Group]	Oryza_sativa	100	1.5e-38
TRINITY_DN12417_c0_g1	CAD59411.1	SMC3 protein [Oryza sativa]	Oryza_sativa	100	2.5e-31
TRINITY_DN12422_c0_g1	XP_015639333.1	nucleoside diphosphate kinase 3 [Oryza sativa Japonica Group]	Oryza_sativa	100	1.4e-34
TRINITY_DN12423_c0_g1	XP_007508441.1	Eukaryotic translation initiation factor 1A, X-chromosomal [Bathycoccus prasinos]	Bathycoccus_prasinos	81.4	8e-27
TRINITY_DN12428_c0_g2	XP_017252793.1	PREDICTED: magnesium-protoporphyrin IX monomethyl ester [oxidative] cyclase, chloroplastic-like [Daucus carota subsp. sativus]	Daucus_carota	91.8	6.5e-212
TRINITY_DN12434_c0_g1	KZM95036.1	hypothetical protein DCAR_018278 [Daucus carota subsp. sativus]	Daucus_carota	57.9	3.6e-23
TRINITY_DN12448_c0_g2	ABF94897.1	expressed protein [Oryza sativa Japonica Group]	Oryza_sativa	98.8	1.9e-14
TRINITY_DN12468_c0_g1	RVW80164.1	Berberine bridge enzyme-like 2 [Vitis vinifera]	Vitis_vinifera	64	2e-20
TRINITY_DN1247_c0_g1	XP_015636423.1	protein RCC2 isoform X2 [Oryza sativa Japonica Group]	Oryza_sativa	100	6.4e-06
TRINITY_DN12481_c0_g1	RZC01088.1	F-box/LRR-repeat protein 14 isoform J [Glycine soja]	Glycine_soja	73.5	1.8e-19
TRINITY_DN12486_c0_g1	XP_023915239.1	myosin type-2 heavy chain 1-like [Quercus suber]	Quercus_suber	56.9	4.8e-14
TRINITY_DN12497_c0_g1	ACU18267.1	unknown [Glycine max]	Glycine_max	94	6.7e-17
TRINITY_DN12501_c0_g1	EAZ03645.1	hypothetical protein OsI_25780 [Oryza sativa Indica Group]	Oryza_sativa	100	3.2e-37
TRINITY_DN12512_c0_g1	XP_017250111.1	PREDICTED: indole-3-acetic acid-amido synthetase GH3.6-like [Daucus carota subsp. sativus]	Daucus_carota	72.4	3.9e-14
TRINITY_DN12530_c0_g1	KHN12909.1	Importin subunit alpha-1 [Glycine soja]	Glycine_soja	100	1.1e-38
TRINITY_DN12550_c0_g1	RAL38227.1	hypothetical protein DM860_018067 [Cuscuta australis]	Cuscuta_australis	43	4.9e-07
TRINITY_DN12554_c0_g1	NP_001351591.1	uncharacterized protein LOC100526891 precursor [Glycine max]	Glycine_max	100	5.5e-23
TRINITY_DN12564_c0_g1	XP_003519001.1	tryptophan synthase beta chain 1 [Glycine max]	Glycine_max	100	2.5e-37
TRINITY_DN12577_c0_g1	KRH12215.1	hypothetical protein GLYMA_15G159800 [Glycine max]	Glycine_max	98.5	4.5e-30
TRINITY_DN12580_c0_g1	XP_010696214.1	PREDICTED: uncharacterized protein LOC104908764 [Beta vulgaris subsp. vulgaris]	Beta_vulgaris	66.7	1.5e-08
TRINITY_DN12586_c0_g1	EAY82481.1	hypothetical protein OsI_37698 [Oryza sativa Indica Group]	Oryza_sativa	100	4.5e-36
TRINITY_DN12592_c0_g2	XP_011101231.1	uncharacterized protein LOC105179327 [Sesamum indicum]	Sesamum_indicum	47.3	1.3e-12
TRINITY_DN12592_c1_g2	PWA87891.1	RNA-directed DNA polymerase, eukaryota, Reverse transcriptase zinc-binding domain protein [Artemisia annua]	Artemisia_annua	46.7	3.4e-17
TRINITY_DN12622_c0_g1	ACU13634.1	unknown, partial [Glycine max]	Glycine_max	85.6	3.1e-34
TRINITY_DN12625_c0_g1	KZM84600.1	hypothetical protein DCAR_027978 [Daucus carota subsp. sativus]	Daucus_carota	55.8	1.7e-15
TRINITY_DN12631_c0_g1	KZM96249.1	hypothetical protein DCAR_019491 [Daucus carota subsp. sativus]	Daucus_carota	56.5	2.3e-07
TRINITY_DN12633_c0_g1	XP_017217772.1	PREDICTED: nudix hydrolase 8-like isoform X1 [Daucus carota subsp. sativus]	Daucus_carota	80.3	3.8e-24
TRINITY_DN12636_c0_g2	XP_024376611.1	guanine nucleotide-binding protein subunit beta-like protein [Physcomitrella patens]	Physcomitrella_patens	74.4	6.6e-30
TRINITY_DN12643_c0_g1	XP_005851876.1	hypothetical protein CHLNCDRAFT_133450 [Chlorella variabilis]	Chlorella_variabilis	86.7	7.7e-15
TRINITY_DN12653_c0_g1	XP_005851754.1	hypothetical protein CHLNCDRAFT_133134 [Chlorella variabilis]	Chlorella_variabilis	48.7	2.9e-12
TRINITY_DN12653_c0_g2	EPS68515.1	hypothetical protein M569_06254 [Genlisea aurea]	Genlisea_aurea	71.1	6.8e-16
TRINITY_DN12671_c0_g1	XP_015620540.1	serine hydroxymethyltransferase 4 [Oryza sativa Japonica Group]	Oryza_sativa	100	3.5e-32
TRINITY_DN12711_c0_g1	PIA55349.1	hypothetical protein AQUCO_00800240v1 [Aquilegia coerulea]	Aquilegia_coerulea	56.5	4.3e-70
TRINITY_DN12714_c0_g1	ABF94648.1	Neutral alpha-glucosidase AB precursor, putative, expressed [Oryza sativa Japonica Group]	Oryza_sativa	100	1.2e-45
TRINITY_DN12715_c0_g2	NP_001236116.2	dirigent-like protein precursor [Glycine max]	Glycine_max	100	1e-27
TRINITY_DN12720_c0_g1	RZB43538.1	Lipid phosphate phosphatase 2 isoform B, partial [Glycine soja]	Glycine_soja	100	3.4e-30
TRINITY_DN12735_c0_g1	XP_017232601.1	PREDICTED: uncharacterized protein LOC108206724 [Daucus carota subsp. sativus]	Daucus_carota	73.9	1.4e-65
TRINITY_DN12738_c0_g1	XP_017245024.1	PREDICTED: WAT1-related protein At2g37460-like [Daucus carota subsp. sativus]	Daucus_carota	89.1	2.4e-182
TRINITY_DN12788_c0_g1	XP_021763166.1	wall-associated receptor kinase 2-like [Chenopodium quinoa]	Chenopodium_quinoa	43.9	4.7e-06
TRINITY_DN12791_c0_g1	RVW60235.1	Retrovirus-related Pol polyprotein from transposon RE1 [Vitis vinifera]	Vitis_vinifera	64.9	2e-24
TRINITY_DN12819_c0_g1	NP_001147066.1	60S ribosomal protein L37a isoform 2 [Zea mays]	Zea_mays	100	1.5e-45
TRINITY_DN12835_c0_g1	EAZ10562.1	hypothetical protein OsJ_00395 [Oryza sativa Japonica Group]	Oryza_sativa	100	3.4e-13
TRINITY_DN12845_c0_g1	XP_024017642.1	uncharacterized protein LOC21400458 [Morus notabilis]	Morus_notabilis	90	1.3e-13
TRINITY_DN12850_c0_g4	KZN02803.1	hypothetical protein DCAR_011559 [Daucus carota subsp. sativus]	Daucus_carota	76.7	3.2e-18
TRINITY_DN1289_c0_g1	XP_015641231.1	proteasome subunit beta type-3 [Oryza sativa Japonica Group]	Oryza_sativa	100	2.2e-23
TRINITY_DN1290_c0_g1	EAZ09914.1	hypothetical protein OsI_32210 [Oryza sativa Indica Group]	Oryza_sativa	100	1.3e-46
TRINITY_DN12919_c0_g1	XP_015620881.1	uncharacterized protein LOC4325142 [Oryza sativa Japonica Group]	Oryza_sativa	100	1.3e-42
TRINITY_DN12919_c0_g2	XP_015620881.1	uncharacterized protein LOC4325142 [Oryza sativa Japonica Group]	Oryza_sativa	100	1.5e-43
TRINITY_DN12940_c0_g1	ACU16628.1	unknown, partial [Glycine max]	Glycine_max	100	1.4e-31
TRINITY_DN12943_c0_g1	AGP76257.1	blast and wounding induced mitogen-activated protein, partial [Oryza rufipogon]	Oryza_rufipogon	100	1.6e-30
TRINITY_DN12944_c0_g1	KDD73606.1	hypothetical protein H632_c2013p0, partial [Helicosporidium sp. ATCC 50920]	Helicosporidium_sp._ATCC_50920	67.5	1.3e-28
TRINITY_DN12956_c0_g2	XP_019420004.1	PREDICTED: ras-related protein RHN1-like [Lupinus angustifolius]	Lupinus_angustifolius	67.9	6.3e-26
TRINITY_DN12960_c0_g1	XP_015631402.1	superoxide dismutase [Cu-Zn] 2 isoform X1 [Oryza sativa Japonica Group]	Oryza_sativa	66	1.9e-31
TRINITY_DN12962_c0_g1	XP_015627280.1	temperature-induced lipocalin-1 [Oryza sativa Japonica Group]	Oryza_sativa	100	4.2e-38
TRINITY_DN12965_c0_g1	XP_023900337.1	ketoreductase azaE-like [Quercus suber]	Quercus_suber	48.2	2.7e-06
TRINITY_DN12976_c0_g1	XP_017220132.1	PREDICTED: type IV inositol polyphosphate 5-phosphatase 9 [Daucus carota subsp. sativus]	Daucus_carota	85.9	5.5e-25
TRINITY_DN12983_c0_g2	EEC83674.1	hypothetical protein OsI_29455 [Oryza sativa Indica Group]	Oryza_sativa	100	1.4e-13
TRINITY_DN12997_c0_g1	XP_017226691.1	PREDICTED: OTU domain-containing protein 6B [Daucus carota subsp. sativus]	Daucus_carota	82.7	4.7e-129
TRINITY_DN13003_c0_g1	XP_017236084.1	PREDICTED: uncharacterized protein LOC108209603 isoform X2 [Daucus carota subsp. sativus]	Daucus_carota	78.4	1e-111
TRINITY_DN13007_c1_g1	XP_015642019.1	LRR receptor-like serine/threonine-protein kinase ERECTA [Oryza sativa Japonica Group]	Oryza_sativa	100	1.3e-38
TRINITY_DN13007_c1_g3	EEC74102.1	hypothetical protein OsI_09151 [Oryza sativa Indica Group]	Oryza_sativa	100	1.3e-38
TRINITY_DN13017_c0_g1	RZC18318.1	Oxysterol-binding protein-related protein 1C isoform A [Glycine soja]	Glycine_soja	100	8.6e-44
TRINITY_DN13029_c0_g1	RZB73677.1	Protein transport protein SEC31-like B isoform D [Glycine soja]	Glycine_soja	100	2.8e-27
TRINITY_DN13048_c0_g2	XP_017246189.1	PREDICTED: eukaryotic translation initiation factor 3 subunit A-like [Daucus carota subsp. sativus]	Daucus_carota	92.9	2.6e-32
TRINITY_DN13098_c0_g1	RZB42520.1	Ubiquitin carboxyl-terminal hydrolase 12 isoform C [Glycine soja]	Glycine_soja	100	3e-31
TRINITY_DN13109_c0_g1	KHN26799.1	U5 small nuclear ribonucleoprotein 200 kDa helicase [Glycine soja]	Glycine_soja	100	2.4e-34
TRINITY_DN13116_c0_g1	XP_011077765.1	serotonin N-acetyltransferase 2, chloroplastic [Sesamum indicum]	Sesamum_indicum	73.7	1.4e-73
TRINITY_DN13118_c0_g1	XP_006659655.1	PREDICTED: RHOMBOID-like protein 2 [Oryza brachyantha]	Oryza_brachyantha	98.7	4.8e-33
TRINITY_DN13121_c0_g1	XP_006577155.1	probable pectinesterase/pectinesterase inhibitor 20 [Glycine max]	Glycine_max	100	2.4e-32
TRINITY_DN13123_c0_g1	XP_026445445.1	uncharacterized protein LOC113346062 [Papaver somniferum]	Papaver_somniferum	68.4	4.5e-26
TRINITY_DN13124_c0_g1	XP_017219275.1	PREDICTED: putative cell wall protein [Daucus carota subsp. sativus]	Daucus_carota	75.4	6.6e-18
TRINITY_DN13135_c0_g1	AFK43759.1	unknown [Lotus japonicus]	Lotus_japonicus	54.2	1.4e-11
TRINITY_DN13135_c0_g2	AFK43759.1	unknown [Lotus japonicus]	Lotus_japonicus	53.3	6.3e-13
TRINITY_DN13143_c0_g1	PWA62706.1	ribonuclease H-like domain-containing protein [Artemisia annua]	Artemisia_annua	51.5	3.5e-11
TRINITY_DN13147_c0_g2	XP_023914364.1	uncharacterized mitochondrial carrier C8C9.12c-like [Quercus suber]	Quercus_suber	46.7	7.4e-07
TRINITY_DN13147_c0_g3	GAQ82434.1	mitochondrial substrate carrier family protein [Klebsormidium nitens]	Klebsormidium_nitens	59.5	1.6e-18
TRINITY_DN13176_c0_g1	XP_017225039.1	PREDICTED: protein FAR1-RELATED SEQUENCE 5-like [Daucus carota subsp. sativus]	Daucus_carota	57.1	1.8e-14
TRINITY_DN13183_c0_g1	NP_001348203.1	WRKY transcription factor 19 [Glycine max]	Glycine_max	100	3.4e-28
TRINITY_DN13207_c0_g1	XP_019436330.1	PREDICTED: protein FAR1-RELATED SEQUENCE 5-like [Lupinus angustifolius]	Lupinus_angustifolius	70.8	5.5e-18
TRINITY_DN13247_c0_g1	XP_024390737.1	heterogeneous nuclear ribonucleoprotein Q-like [Physcomitrella patens]	Physcomitrella_patens	40	4.8e-08
TRINITY_DN13256_c0_g1	OAE23825.1	hypothetical protein AXG93_369s1190 [Marchantia polymorpha subsp. ruderalis]	Marchantia_polymorpha	56	7.2e-18
TRINITY_DN13279_c0_g1	XP_003542685.1	ribosome biogenesis regulatory protein homolog [Glycine max]	Glycine_max	100	7.3e-37
TRINITY_DN13297_c0_g1	KZN03067.1	hypothetical protein DCAR_011823 [Daucus carota subsp. sativus]	Daucus_carota	72.2	4.7e-43
TRINITY_DN13344_c0_g1	XP_021992725.1	long chain acyl-CoA synthetase 9, chloroplastic-like [Helianthus annuus]	Helianthus_annuus	39.2	2.7e-09
TRINITY_DN13345_c0_g1	XP_025881575.1	protein GUCD1 isoform X3 [Oryza sativa Japonica Group]	Oryza_sativa	100	2.3e-48
TRINITY_DN13348_c0_g1	XP_017224458.1	PREDICTED: 40S ribosomal protein S29-like [Daucus carota subsp. sativus]	Daucus_carota	98.2	7.9e-29
TRINITY_DN13361_c0_g3	XP_017221109.1	PREDICTED: ABC transporter B family member 9-like isoform X1 [Daucus carota subsp. sativus]	Daucus_carota	68.7	2e-19
TRINITY_DN1336_c0_g1	KZM95077.1	hypothetical protein DCAR_018319 [Daucus carota subsp. sativus]	Daucus_carota	81.9	1.1e-35
TRINITY_DN13372_c0_g1	ACN31555.1	unknown [Zea mays]	Zea_mays	85.4	1.2e-31
TRINITY_DN13380_c0_g1	XP_004502577.1	putative transcription elongation factor SPT5 homolog 1 [Cicer arietinum]	Cicer_arietinum	100	1.8e-31
TRINITY_DN13385_c0_g1	XP_017235434.1	PREDICTED: uncharacterized protein LOC108209165 [Daucus carota subsp. sativus]	Daucus_carota	87.1	2.2e-29
TRINITY_DN13388_c0_g1	XP_015630932.1	probable inactive poly [ADP-ribose] polymerase SRO1 [Oryza sativa Japonica Group]	Oryza_sativa	100	9.7e-33
TRINITY_DN13388_c0_g2	XP_015630932.1	probable inactive poly [ADP-ribose] polymerase SRO1 [Oryza sativa Japonica Group]	Oryza_sativa	100	7.3e-31
TRINITY_DN13391_c0_g1	NP_001238168.2	PR1a precursor [Glycine max]	Glycine_max	100	2.1e-99
TRINITY_DN13396_c0_g1	ABG21900.1	2-oxoisovalerate dehydrogenase alpha subunit, mitochondrial precursor, putative, expressed [Oryza sativa Japonica Group]	Oryza_sativa	94.3	3.6e-30
TRINITY_DN13401_c0_g1	XP_015637175.1	prohibitin-3, mitochondrial [Oryza sativa Japonica Group]	Oryza_sativa	100	9.7e-14
TRINITY_DN13402_c0_g1	XP_017246403.1	PREDICTED: probable pectinesterase 15 isoform X1 [Daucus carota subsp. sativus]	Daucus_carota	91.3	7.7e-30
TRINITY_DN1340_c0_g1	XP_015640544.1	V-type proton ATPase subunit C [Oryza sativa Japonica Group]	Oryza_sativa	100	4.9e-32
TRINITY_DN13411_c0_g2	XP_015643826.1	nucleolar GTP-binding protein 1 [Oryza sativa Japonica Group]	Oryza_sativa	100	4.1e-28
TRINITY_DN13411_c0_g3	BAF18964.1	Os06g0195900, partial [Oryza sativa Japonica Group]	Oryza_sativa	100	5e-29
TRINITY_DN13412_c0_g2	XP_015635405.1	cell division cycle 20.2, cofactor of APC complex isoform X1 [Oryza sativa Japonica Group]	Oryza_sativa	97.3	1.4e-37
TRINITY_DN13417_c0_g1	BAJ85408.1	predicted protein [Hordeum vulgare subsp. vulgare]	Hordeum_vulgare	62	5.2e-59
TRINITY_DN13440_c0_g1	XP_017241376.1	PREDICTED: phytolongin Phyl2.2-like [Daucus carota subsp. sativus]	Daucus_carota	76.6	2.1e-28
TRINITY_DN13441_c0_g1	XP_015628437.1	glucan endo-1,3-beta-glucosidase 13 [Oryza sativa Japonica Group]	Oryza_sativa	100	2.5e-43
TRINITY_DN13472_c0_g1	XP_016505836.1	PREDICTED: uncharacterized protein LOC107823665 [Nicotiana tabacum]	Nicotiana_tabacum	67.1	2.7e-81
TRINITY_DN13479_c0_g2	XP_003553818.1	cinnamoyl-CoA reductase-like SNL6 [Glycine max]	Glycine_max	100	1.3e-35
TRINITY_DN13481_c0_g1	NP_001241244.1	uncharacterized protein LOC100795577 [Glycine max]	Glycine_max	100	5.6e-39
TRINITY_DN13482_c0_g1	KHN04824.1	rRNA 2'-O-methyltransferase fibrillarin 2 [Glycine soja]	Glycine_soja	100	6.8e-32
TRINITY_DN13501_c0_g1	PQQ16549.1	annexin D3 [Prunus yedoensis var. nudiflora]	Prunus_yedoensis	35.2	9.1e-06
TRINITY_DN13502_c0_g1	XP_017238262.1	PREDICTED: photosystem I reaction center subunit IV A, chloroplastic-like [Daucus carota subsp. sativus]	Daucus_carota	62.7	3.5e-10
TRINITY_DN13505_c0_g1	XP_006600154.1	uncharacterized protein LOC100527652 isoform X1 [Glycine max]	Glycine_max	100	6e-36
TRINITY_DN13563_c0_g1	ACU18176.1	unknown [Glycine max]	Glycine_max	100	9.8e-36
TRINITY_DN13583_c0_g1	AAP15456.1	methylmalonate semialdehyde dehydrogenase, partial [Triticum aestivum]	Triticum_aestivum	100	1.5e-25
TRINITY_DN13586_c0_g1	XP_023927037.1	inosine-5'-monophosphate dehydrogenase-like [Quercus suber]	Quercus_suber	55.7	8.7e-16
TRINITY_DN13594_c0_g1	XP_017221992.1	PREDICTED: vacuolar amino acid transporter 1 [Daucus carota subsp. sativus]	Daucus_carota	82.8	3.1e-219
TRINITY_DN13595_c0_g1	RZC14078.1	26S proteasome non-ATPase regulatory subunit 1-like A isoform D [Glycine soja]	Glycine_soja	100	7e-31
TRINITY_DN13603_c0_g1	EAY87248.1	hypothetical protein OsI_08650 [Oryza sativa Indica Group]	Oryza_sativa	100	7.9e-40
TRINITY_DN13603_c0_g2	EAY87248.1	hypothetical protein OsI_08650 [Oryza sativa Indica Group]	Oryza_sativa	100	8e-31
TRINITY_DN13608_c0_g1	XP_017215968.1	PREDICTED: uncharacterized protein LOC108193695 [Daucus carota subsp. sativus]	Daucus_carota	67.4	1.5e-36
TRINITY_DN13614_c0_g1	KZM81943.1	hypothetical protein DCAR_029556 [Daucus carota subsp. sativus]	Daucus_carota	70.7	2.9e-21
TRINITY_DN13614_c0_g3	XP_017224998.1	PREDICTED: replication factor C subunit 3-like [Daucus carota subsp. sativus]	Daucus_carota	81.7	2.5e-36
TRINITY_DN13617_c0_g1	XP_023740343.1	uncharacterized protein LOC111888388 [Lactuca sativa]	Lactuca_sativa	79.6	1.1e-15
TRINITY_DN1361_c0_g2	XP_015621360.1	signal recognition particle subunit SRP72 [Oryza sativa Japonica Group]	Oryza_sativa	100	6e-33
TRINITY_DN13636_c0_g2	XP_010682511.1	PREDICTED: uncharacterized protein LOC104897349 [Beta vulgaris subsp. vulgaris]	Beta_vulgaris	41.7	7e-12
TRINITY_DN13638_c0_g1	XP_017242617.1	PREDICTED: serine/threonine-protein phosphatase 7 long form homolog [Daucus carota subsp. sativus]	Daucus_carota	49.5	2.1e-25
TRINITY_DN13647_c0_g1	KZN02354.1	hypothetical protein DCAR_011108 [Daucus carota subsp. sativus]	Daucus_carota	75.4	5.3e-23
TRINITY_DN13647_c0_g2	KZN02354.1	hypothetical protein DCAR_011108 [Daucus carota subsp. sativus]	Daucus_carota	53.3	1e-07
TRINITY_DN13650_c0_g1	XP_017217370.1	PREDICTED: protein ODORANT1 [Daucus carota subsp. sativus]	Daucus_carota	66.3	2.7e-23
TRINITY_DN13652_c0_g1	XP_010277936.1	PREDICTED: heterogeneous nuclear ribonucleoprotein U-like protein 1 isoform X1 [Nelumbo nucifera]	Nelumbo_nucifera	42.5	6.4e-10
TRINITY_DN1367_c0_g1	XP_024390255.1	40S ribosomal protein S12-like [Physcomitrella patens]	Physcomitrella_patens	63	6.9e-41
TRINITY_DN13683_c0_g1	KZM86671.1	hypothetical protein DCAR_023805 [Daucus carota subsp. sativus]	Daucus_carota	90.9	1.5e-37
TRINITY_DN1368_c0_g1	EAY81382.1	hypothetical protein OsI_36553 [Oryza sativa Indica Group]	Oryza_sativa	100	4e-27
TRINITY_DN136_c0_g1	XP_017227561.1	PREDICTED: uncharacterized protein LOC108203276 isoform X1 [Daucus carota subsp. sativus]	Daucus_carota	59.3	1.4e-25
TRINITY_DN13702_c0_g1	XP_015083284.1	auxin-induced protein 15A-like [Solanum pennellii]	Solanum_pennellii	65	3.4e-29
TRINITY_DN1372_c0_g1	KHN46511.1	Peroxidase 5 [Glycine soja]	Glycine_soja	94.4	1.3e-29
TRINITY_DN13734_c0_g2	BAH79622.1	hypothetical protein [Glycine max]	Glycine_max	100	3.7e-35
TRINITY_DN13744_c0_g1	XP_017244715.1	PREDICTED: WD repeat-containing protein 82-B [Daucus carota subsp. sativus]	Daucus_carota	90.1	6.6e-174
TRINITY_DN13752_c0_g1	GBF90951.1	40S ribosomal protein S4 [Raphidocelis subcapitata]	Raphidocelis_subcapitata	61.9	1.3e-23
TRINITY_DN13755_c0_g1	XP_017251248.1	PREDICTED: prolyl-tRNA synthetase associated domain-containing protein 1 [Daucus carota subsp. sativus]	Daucus_carota	83.9	6.7e-143
TRINITY_DN13768_c0_g1	XP_017231762.1	PREDICTED: uncharacterized protein LOC108206089 [Daucus carota subsp. sativus]	Daucus_carota	83.1	1.8e-27
TRINITY_DN13771_c0_g1	AAP84973.1	callose synthase-like protein, partial [Oryza sativa Japonica Group]	Oryza_sativa	100	5.6e-30
TRINITY_DN13772_c0_g1	XP_017226159.1	PREDICTED: uncharacterized protein LOC108202282 [Daucus carota subsp. sativus]	Daucus_carota	72.4	2.1e-46
TRINITY_DN13800_c0_g2	KYP41491.1	hypothetical protein KK1_037138 [Cajanus cajan]	Cajanus_cajan	56.2	1.4e-18
TRINITY_DN13809_c1_g1	XP_015633215.1	uncharacterized protein LOC107275868 [Oryza sativa Japonica Group]	Oryza_sativa	100	8.2e-32
TRINITY_DN13824_c0_g1	XP_017232916.1	PREDICTED: GDSL esterase/lipase APG-like [Daucus carota subsp. sativus]	Daucus_carota	89.6	6.5e-26
TRINITY_DN13824_c0_g2	XP_017232916.1	PREDICTED: GDSL esterase/lipase APG-like [Daucus carota subsp. sativus]	Daucus_carota	89.8	3.9e-39
TRINITY_DN13826_c0_g1	QAB01368.1	auxin transport protein BIG [Oryza sativa Japonica Group]	Oryza_sativa	100	3.6e-33
TRINITY_DN13826_c0_g2	QAB01368.1	auxin transport protein BIG [Oryza sativa Japonica Group]	Oryza_sativa	98.6	1.7e-16
TRINITY_DN13829_c0_g1	RZC20794.1	Small nuclear ribonucleoprotein SmD1b, partial [Glycine soja]	Glycine_soja	100	4.2e-31
TRINITY_DN13837_c0_g1	KJB35759.1	hypothetical protein B456_006G126900 [Gossypium raimondii]	Gossypium_raimondii	71.7	5.9e-19
TRINITY_DN13845_c0_g1	RZB81433.1	hypothetical protein D0Y65_030937, partial [Glycine soja]	Glycine_soja	100	6.6e-41
TRINITY_DN13849_c0_g1	XP_017234162.1	PREDICTED: glutaredoxin-C10-like [Daucus carota subsp. sativus]	Daucus_carota	78.4	3.9e-46
TRINITY_DN13864_c0_g1	YP_717290.1	cytochrome b (mitochondrion) [Ostreococcus tauri]	Ostreococcus_tauri	52.6	2.6e-67
TRINITY_DN13864_c0_g2	YP_008816057.1	apocytochrome b (mitochondrion) [Entransia fimbriata]	Entransia_fimbriata	57.8	3.2e-27
TRINITY_DN13864_c0_g4	AJF36704.1	apocytochrome b (mitochondrion) [Klebsormidium flaccidum]	Klebsormidium_flaccidum	57.9	2e-107
TRINITY_DN13875_c0_g1	XP_017214998.1	PREDICTED: uncharacterized protein LOC108192960 [Daucus carota subsp. sativus]	Daucus_carota	90.8	1.3e-51
TRINITY_DN13886_c0_g2	RZB43324.1	hypothetical protein D0Y65_053753 [Glycine soja]	Glycine_soja	100	4.5e-27
TRINITY_DN13887_c0_g1	XP_017225855.1	PREDICTED: uncharacterized protein LOC108202006 [Daucus carota subsp. sativus]	Daucus_carota	71.9	3.6e-77
TRINITY_DN13888_c0_g1	XP_017245049.1	PREDICTED: NADH dehydrogenase [ubiquinone] iron-sulfur protein 4, mitochondrial-like [Daucus carota subsp. sativus]	Daucus_carota	80.1	5.7e-69
TRINITY_DN13893_c0_g1	EFJ14366.1	hypothetical protein SELMODRAFT_120899 [Selaginella moellendorffii]	Selaginella_moellendorffii	43.5	3.1e-07
TRINITY_DN13906_c1_g1	XP_017215247.1	PREDICTED: vacuolar protein sorting-associated protein 55 homolog [Daucus carota subsp. sativus]	Daucus_carota	90.6	6.1e-65
TRINITY_DN13917_c0_g1	KZM81930.1	hypothetical protein DCAR_029543 [Daucus carota subsp. sativus]	Daucus_carota	66.7	3.7e-16
TRINITY_DN13921_c0_g1	ABF94150.1	Beta-galactosidase precursor, putative, expressed [Oryza sativa Japonica Group]	Oryza_sativa	100	1.1e-33
TRINITY_DN13933_c0_g1	XP_017216271.1	PREDICTED: uncharacterized protein LOC108193925 [Daucus carota subsp. sativus]	Daucus_carota	69	3.3e-23
TRINITY_DN13935_c0_g1	KZM85850.1	hypothetical protein DCAR_026728 [Daucus carota subsp. sativus]	Daucus_carota	77.8	3.9e-22
TRINITY_DN13936_c1_g2	RZB45548.1	Cationic peroxidase 1, partial [Glycine soja]	Glycine_soja	100	6.2e-30
TRINITY_DN13946_c0_g1	XP_017230781.1	PREDICTED: VQ motif-containing protein 22-like [Daucus carota subsp. sativus]	Daucus_carota	73.3	7.7e-40
TRINITY_DN13952_c0_g1	EAY83985.1	hypothetical protein OsI_39211 [Oryza sativa Indica Group]	Oryza_sativa	100	4.1e-37
TRINITY_DN13957_c0_g1	XP_017238848.1	PREDICTED: dolichol phosphate-mannose biosynthesis regulatory protein [Daucus carota subsp. sativus]	Daucus_carota	95	1.8e-34
TRINITY_DN13971_c0_g1	KHN26599.1	Vacuolar-sorting receptor 6 [Glycine soja]	Glycine_soja	100	2.6e-37
TRINITY_DN13978_c0_g1	XP_015625935.1	DNA-binding protein BIN4 [Oryza sativa Japonica Group]	Oryza_sativa	100	2.5e-44
TRINITY_DN13984_c0_g1	AAG34805.1	glutathione S-transferase GST 15, partial [Glycine max]	Glycine_max	100	2.5e-83
TRINITY_DN13985_c0_g2	KZM80251.1	hypothetical protein DCAR_032119 [Daucus carota subsp. sativus]	Daucus_carota	72.6	5.6e-17
TRINITY_DN13996_c0_g2	NP_001240908.1	glutaredoxin-like family protein [Glycine max]	Glycine_max	100	4.3e-30
TRINITY_DN14005_c0_g2	XP_017250538.1	PREDICTED: uncharacterized protein LOC108221151 [Daucus carota subsp. sativus]	Daucus_carota	56	2.1e-21
TRINITY_DN14032_c0_g1	XP_017225876.1	PREDICTED: LYR motif-containing protein At3g19508 [Daucus carota subsp. sativus]	Daucus_carota	88.1	3.2e-36
TRINITY_DN1403_c0_g1	KZM85813.1	hypothetical protein DCAR_026765 [Daucus carota subsp. sativus]	Daucus_carota	67.3	1.1e-12
TRINITY_DN14058_c0_g2	NP_001237627.1	uncharacterized protein LOC100306106 [Glycine max]	Glycine_max	100	6.8e-50
TRINITY_DN14063_c0_g1	BAK01039.1	predicted protein [Hordeum vulgare subsp. vulgare]	Hordeum_vulgare	58.1	1.2e-18
TRINITY_DN14063_c0_g2	AFK44937.1	unknown [Lotus japonicus]	Lotus_japonicus	58.1	3.5e-20
TRINITY_DN14063_c0_g3	BAK01039.1	predicted protein [Hordeum vulgare subsp. vulgare]	Hordeum_vulgare	63.3	5.9e-27
TRINITY_DN14070_c0_g1	RZC12120.1	Glycine-rich RNA-binding protein RZ1A [Glycine soja]	Glycine_soja	98.7	5.2e-37
TRINITY_DN14081_c0_g1	XP_017240582.1	PREDICTED: basic leucine zipper 43 [Daucus carota subsp. sativus]	Daucus_carota	67.1	1.4e-16
TRINITY_DN14084_c0_g1	ACU16810.1	unknown [Glycine max]	Glycine_max	100	2.6e-37
TRINITY_DN14112_c0_g3	XP_017232226.1	PREDICTED: pentatricopeptide repeat-containing protein At1g01970 [Daucus carota subsp. sativus]	Daucus_carota	55.3	2.1e-14
TRINITY_DN14113_c0_g4	XP_017247904.1	PREDICTED: pentatricopeptide repeat-containing protein At1g18485 [Daucus carota subsp. sativus]	Daucus_carota	66.7	5.5e-17
TRINITY_DN14120_c0_g2	XP_023888872.1	S-adenosylmethionine decarboxylase proenzyme-like [Quercus suber]	Quercus_suber	41.1	2e-11
TRINITY_DN14146_c0_g1	KZM83768.1	hypothetical protein DCAR_028810 [Daucus carota subsp. sativus]	Daucus_carota	69	7.9e-07
TRINITY_DN14146_c0_g2	KZM83768.1	hypothetical protein DCAR_028810 [Daucus carota subsp. sativus]	Daucus_carota	48.4	6.3e-09
TRINITY_DN1414_c0_g1	XP_015640176.1	delta-1-pyrroline-5-carboxylate synthase 1 [Oryza sativa Japonica Group]	Oryza_sativa	98.7	4.5e-36
TRINITY_DN14156_c0_g1	XP_016733419.1	PREDICTED: LOW QUALITY PROTEIN: DENN domain-containing protein 4B-like [Gossypium hirsutum]	Gossypium_hirsutum	63.2	1e-15
TRINITY_DN14158_c0_g1	XP_003523269.1	peroxidase P7 [Glycine max]	Glycine_max	100	1.1e-33
TRINITY_DN14160_c0_g1	XP_009398076.1	PREDICTED: zinc finger CCCH domain-containing protein 17 isoform X1 [Musa acuminata subsp. malaccensis]	Musa_acuminata	50.7	3e-10
TRINITY_DN14165_c0_g1	NP_001237117.1	uncharacterized protein LOC100527769 [Glycine max]	Glycine_max	100	1.1e-55
TRINITY_DN14169_c0_g1	RWR85960.1	putative cyclophilin-type peptidyl-prolyl cis-trans isomerase [Cinnamomum micranthum f. kanehirae]	Cinnamomum_micranthum	47.9	1.2e-80
TRINITY_DN14181_c0_g1	NP_001236314.1	uncharacterized protein LOC100499808 [Glycine max]	Glycine_max	100	1.1e-54
TRINITY_DN14183_c0_g1	OAY38651.1	hypothetical protein MANES_10G032300 [Manihot esculenta]	Manihot_esculenta	85.7	5.7e-14
TRINITY_DN14199_c0_g1	XP_017239220.1	PREDICTED: transcription repressor OFP6-like [Daucus carota subsp. sativus]	Daucus_carota	68.4	7.6e-59
TRINITY_DN141_c0_g1	CAD89802.1	histidine amino acid transporter (protoplast) [Oryza sativa Indica Group]	Oryza_sativa	100	5e-34
TRINITY_DN14208_c0_g1	XP_023926175.1	vacuolar protease A-like [Quercus suber]	Quercus_suber	57.9	2.7e-21
TRINITY_DN14216_c0_g1	XP_017256115.1	PREDICTED: glutathione S-transferase T3-like [Daucus carota subsp. sativus]	Daucus_carota	78.5	1.6e-22
TRINITY_DN14218_c0_g1	AAT73619.1	calmodulin cam-206 [Daucus carota]	Daucus_carota	57.5	1.7e-18
TRINITY_DN14226_c0_g1	PKI50012.1	hypothetical protein CRG98_029599 [Punica granatum]	Punica_granatum	78.9	7.8e-25
TRINITY_DN14230_c0_g1	EAY72790.1	hypothetical protein OsI_00654 [Oryza sativa Indica Group]	Oryza_sativa	100	3.2e-25
TRINITY_DN14235_c0_g1	XP_017246200.1	PREDICTED: non-specific lipid-transfer protein-like 1 [Daucus carota subsp. sativus]	Daucus_carota	92.3	1.4e-54
TRINITY_DN14246_c0_g1	NP_001238002.2	putative calcium-binding protein [Glycine max]	Glycine_max	100	3.8e-32
TRINITY_DN14252_c0_g1	XP_014627751.1	superoxide dismutase [Fe], chloroplastic isoform X1 [Glycine max]	Glycine_max	100	5.6e-46
TRINITY_DN14258_c1_g1	ACU18549.1	unknown [Glycine max]	Glycine_max	100	1.9e-34
TRINITY_DN14282_c0_g1	XP_017234447.1	PREDICTED: uncharacterized protein LOC108208427 [Daucus carota subsp. sativus]	Daucus_carota	83.2	8e-69
TRINITY_DN14286_c0_g1	GBG90596.1	hypothetical protein CBR_g50939 [Chara braunii]	Chara_braunii	58.8	1e-08
TRINITY_DN14291_c0_g1	NP_001235190.1	uncharacterized protein LOC100499728 [Glycine max]	Glycine_max	100	7.3e-54
TRINITY_DN14295_c0_g1	AAO72576.1	isoprenoid biosynthesis-like protein, partial [Oryza sativa Japonica Group]	Oryza_sativa	100	7.2e-33
TRINITY_DN14300_c0_g1	XP_017217935.1	PREDICTED: uncharacterized protein LOC108195482 [Daucus carota subsp. sativus]	Daucus_carota	97.4	5e-13
TRINITY_DN14312_c0_g1	XP_017251312.1	PREDICTED: RPM1-interacting protein 4-like [Daucus carota subsp. sativus]	Daucus_carota	61.6	7.4e-75
TRINITY_DN14321_c0_g1	KZN00106.1	hypothetical protein DCAR_008860 [Daucus carota subsp. sativus]	Daucus_carota	75.3	2.6e-24
TRINITY_DN14325_c0_g1	XP_015621998.1	60S ribosomal protein L29-1 [Oryza sativa Japonica Group]	Oryza_sativa	100	4.3e-25
TRINITY_DN14335_c0_g3	GAX82325.1	hypothetical protein CEUSTIGMA_g9754.t1 [Chlamydomonas eustigma]	Chlamydomonas_eustigma	50.7	3.5e-12
TRINITY_DN1433_c0_g2	XP_005851754.1	hypothetical protein CHLNCDRAFT_133134 [Chlorella variabilis]	Chlorella_variabilis	56.6	8.3e-37
TRINITY_DN14344_c0_g1	XP_023899506.1	NADPH--cytochrome P450 reductase-like [Quercus suber]	Quercus_suber	61.7	6.3e-23
TRINITY_DN14347_c0_g1	XP_017227369.1	PREDICTED: uncharacterized protein LOC108203127 [Daucus carota subsp. sativus]	Daucus_carota	54.5	8.9e-15
TRINITY_DN14361_c0_g1	XP_023892258.1	elongation factor 3-like [Quercus suber]	Quercus_suber	86.1	6.1e-30
TRINITY_DN14383_c0_g1	KZM88074.1	hypothetical protein DCAR_025149 [Daucus carota subsp. sativus]	Daucus_carota	72.7	2.1e-20
TRINITY_DN14388_c0_g1	ACU14135.1	unknown [Glycine max]	Glycine_max	100	6.6e-26
TRINITY_DN14390_c0_g1	KZN12008.1	hypothetical protein DCAR_004664 [Daucus carota subsp. sativus]	Daucus_carota	70.8	1.5e-09
TRINITY_DN14396_c0_g1	NP_001237091.1	uncharacterized protein LOC100499864 [Glycine max]	Glycine_max	100	9.4e-20
TRINITY_DN143_c0_g1	AAO37502.2	expressed protein [Oryza sativa Japonica Group]	Oryza_sativa	100	1.3e-36
TRINITY_DN14402_c0_g1	ACF85961.1	unknown [Zea mays]	Zea_mays	90.7	3.8e-35
TRINITY_DN14409_c0_g1	XP_017236901.1	PREDICTED: nicotianamine synthase-like [Daucus carota subsp. sativus]	Daucus_carota	84	3.7e-27
TRINITY_DN14409_c0_g2	XP_017236901.1	PREDICTED: nicotianamine synthase-like [Daucus carota subsp. sativus]	Daucus_carota	80.9	2.5e-33
TRINITY_DN14426_c0_g1	XP_015636452.1	probable polyamine oxidase 4 [Oryza sativa Japonica Group]	Oryza_sativa	100	1.7e-34
TRINITY_DN14429_c0_g1	RZB61660.1	Tripeptidyl-peptidase 2 isoform A [Glycine soja]	Glycine_soja	100	9.7e-31
TRINITY_DN14431_c0_g1	BAF20917.1	Os07g0173200 [Oryza sativa Japonica Group]	Oryza_sativa	100	5.6e-31
TRINITY_DN14435_c0_g1	BAJ87032.1	predicted protein [Hordeum vulgare subsp. vulgare]	Hordeum_vulgare	55.1	1e-17
TRINITY_DN14439_c0_g1	XP_017220748.1	PREDICTED: uncharacterized protein LOC108197599 [Daucus carota subsp. sativus]	Daucus_carota	53.8	8.3e-38
TRINITY_DN14440_c0_g2	XP_003530067.1	NDR1/HIN1-like protein 10 [Glycine max]	Glycine_max	100	5.9e-38
TRINITY_DN14441_c1_g2	XP_017221371.1	PREDICTED: cytochrome P450 72A13-like [Daucus carota subsp. sativus]	Daucus_carota	85.7	1.7e-20
TRINITY_DN14450_c0_g1	XP_016559425.1	PREDICTED: flavin-dependent oxidoreductase FOX2-like [Capsicum annuum]	Capsicum_annuum	66.7	3.4e-11
TRINITY_DN14493_c0_g1	XP_005644716.1	HECT-domain-containing protein [Coccomyxa subellipsoidea C-169]	Coccomyxa_subellipsoidea	55.2	1.1e-20
TRINITY_DN14497_c0_g1	NP_001236692.2	nucleoside diphosphate kinase [Glycine max]	Glycine_max	99.3	5.5e-82
TRINITY_DN14501_c0_g1	RVW56976.1	U-box domain-containing protein 13 [Vitis vinifera]	Vitis_vinifera	86.9	4e-33
TRINITY_DN14504_c0_g1	RZB89232.1	Protein PTEN2A isoform B [Glycine soja]	Glycine_soja	97.2	1.5e-25
TRINITY_DN14520_c0_g1	RXH90692.1	hypothetical protein DVH24_035456 [Malus domestica]	Malus_domestica	59.3	8e-10
TRINITY_DN14534_c0_g2	EAY85094.1	hypothetical protein OsI_06446 [Oryza sativa Indica Group]	Oryza_sativa	100	9.8e-33
TRINITY_DN14546_c1_g1	XP_006573568.1	zinc finger CCCH domain-containing protein 44 isoform X1 [Glycine max]	Glycine_max	100	1.4e-34
TRINITY_DN1454_c0_g1	XP_015647572.1	thioredoxin H1 [Oryza sativa Japonica Group]	Oryza_sativa	100	7.2e-63
TRINITY_DN14550_c0_g1	XP_017245615.1	PREDICTED: mannose-specific lectin-like [Daucus carota subsp. sativus]	Daucus_carota	80.9	4.8e-21
TRINITY_DN14557_c0_g2	EEC78801.1	hypothetical protein OsI_19058 [Oryza sativa Indica Group]	Oryza_sativa	98.8	2.9e-39
TRINITY_DN14564_c0_g1	XP_017238247.1	PREDICTED: 54S ribosomal protein L37, mitochondrial-like [Daucus carota subsp. sativus]	Daucus_carota	84.7	1.2e-54
TRINITY_DN14570_c0_g1	XP_017256240.1	PREDICTED: uncharacterized protein LOC108225794 [Daucus carota subsp. sativus]	Daucus_carota	60.2	1.5e-63
TRINITY_DN14573_c0_g1	E6Y8S8.1	RecName: Full=Non-specific lipid-transfer protein; AltName: Full=Allergen Api g 2.0101; AltName: Allergen=Api g 2; Flags: Precursor	Apium_graveolens	69.5	8.3e-39
TRINITY_DN14575_c0_g1	ACU15795.1	unknown [Glycine max]	Glycine_max	100	2.3e-32
TRINITY_DN14578_c0_g1	XP_017231560.1	PREDICTED: uncharacterized protein LOC108205938 [Daucus carota subsp. sativus]	Daucus_carota	82	8.8e-43
TRINITY_DN14581_c0_g2	XP_017230732.1	PREDICTED: subtilisin-like protease SBT4.3 [Daucus carota subsp. sativus]	Daucus_carota	84.4	3.3e-29
TRINITY_DN14585_c0_g1	XP_017233233.1	PREDICTED: F-box protein At1g49360-like [Daucus carota subsp. sativus]	Daucus_carota	80.3	1e-30
TRINITY_DN14590_c0_g1	NP_001237671.1	WRKY transcription factor 11 [Glycine max]	Glycine_max	100	6.5e-06
TRINITY_DN14591_c0_g1	XP_017216645.1	PREDICTED: uncharacterized protein At5g65660-like [Daucus carota subsp. sativus]	Daucus_carota	69.2	6.6e-36
TRINITY_DN14607_c0_g2	KZM80059.1	hypothetical protein DCAR_000426 [Daucus carota subsp. sativus]	Daucus_carota	60.9	8.1e-11
TRINITY_DN14624_c0_g1	XP_017223991.1	PREDICTED: C-Myc-binding protein homolog [Daucus carota subsp. sativus]	Daucus_carota	80.2	2e-40
TRINITY_DN14626_c1_g1	XP_003556368.1	glu S.griseus protease inhibitor [Glycine max]	Glycine_max	100	4.2e-33
TRINITY_DN14641_c0_g2	XP_001420341.1	predicted protein, partial [Ostreococcus lucimarinus CCE9901]	Ostreococcus_sp._'lucimarinus'	46.2	1.1e-07
TRINITY_DN1464_c0_g1	XP_002442329.1	probable prefoldin subunit 3 [Sorghum bicolor]	Sorghum_bicolor	100	2.2e-27
TRINITY_DN14658_c0_g1	NP_001241936.1	uncharacterized protein LOC100787214 [Glycine max]	Glycine_max	100	1.5e-33
TRINITY_DN14670_c0_g1	YP_009112926.1	cytochrome oxidase subunit II (mitochondrion) [Auxenochlorella protothecoides]	Auxenochlorella_protothecoides	51.1	3.6e-57
TRINITY_DN14670_c0_g2	YP_008816160.1	cytochrome c oxidase subunit 2 (mitochondrion) [Roya obtusa]	Roya_obtusa	51.1	2e-57
TRINITY_DN14670_c0_g3	YP_008816160.1	cytochrome c oxidase subunit 2 (mitochondrion) [Roya obtusa]	Roya_obtusa	51.3	3.4e-55
TRINITY_DN14670_c0_g4	AVM80943.1	cytochrome oxidase subunit II (mitochondrion) [Prototheca zopfii]	Prototheca_zopfii	48.5	2.8e-45
TRINITY_DN14670_c0_g5	AVM80943.1	cytochrome oxidase subunit II (mitochondrion) [Prototheca zopfii]	Prototheca_zopfii	47.3	5.7e-37
TRINITY_DN14674_c0_g2	XP_017233606.1	PREDICTED: uncharacterized protein LOC108207684 [Daucus carota subsp. sativus]	Daucus_carota	85.3	4e-23
TRINITY_DN14680_c0_g1	XP_023929174.1	eukaryotic translation initiation factor eIF-1-like [Quercus suber]	Quercus_suber	61.2	6.7e-33
TRINITY_DN14681_c0_g3	XP_006647517.1	PREDICTED: probable LRR receptor-like serine/threonine-protein kinase At3g47570 isoform X1 [Oryza brachyantha]	Oryza_brachyantha	71.8	6.1e-83
TRINITY_DN14685_c0_g2	GAU28744.1	hypothetical protein TSUD_372530 [Trifolium subterraneum]	Trifolium_subterraneum	84.1	2.3e-29
TRINITY_DN14700_c0_g1	KZN00228.1	hypothetical protein DCAR_008982 [Daucus carota subsp. sativus]	Daucus_carota	62.5	9.1e-20
TRINITY_DN14722_c0_g1	RZB88293.1	Amino acid transporter AVT1C isoform D [Glycine soja]	Glycine_soja	98.7	2.8e-33
TRINITY_DN14725_c0_g1	XP_017238240.1	PREDICTED: mediator of RNA polymerase II transcription subunit 4-like [Daucus carota subsp. sativus]	Daucus_carota	75.6	2.3e-142
TRINITY_DN14726_c1_g1	KHN22403.1	CBL-interacting serine/threonine-protein kinase 5 [Glycine soja]	Glycine_soja	100	1.4e-28
TRINITY_DN14728_c0_g1	XP_002956599.1	2-cys peroxiredoxin, probably cytosolic [Volvox carteri f. nagariensis]	Volvox_carteri	68.6	2.3e-72
TRINITY_DN14732_c0_g1	XP_019421146.1	PREDICTED: casein kinase II subunit beta-3-like [Lupinus angustifolius]	Lupinus_angustifolius	62.7	1.2e-20
TRINITY_DN14733_c0_g1	XP_017245805.1	PREDICTED: glutamate receptor 2.7-like [Daucus carota subsp. sativus]	Daucus_carota	78.6	4.2e-10
TRINITY_DN14735_c0_g1	XP_017248156.1	PREDICTED: subtilisin-like protease SBT4.10 [Daucus carota subsp. sativus]	Daucus_carota	88	0
TRINITY_DN14738_c0_g1	XP_017224547.1	PREDICTED: cytochrome b5 [Daucus carota subsp. sativus]	Daucus_carota	86.6	3.5e-61
TRINITY_DN14745_c0_g1	XP_015650418.1	protein INVOLVED IN DE NOVO 2 [Oryza sativa Japonica Group]	Oryza_sativa	100	1.2e-36
TRINITY_DN14770_c0_g1	EAY95525.1	hypothetical protein OsI_17371 [Oryza sativa Indica Group]	Oryza_sativa	100	7.4e-30
TRINITY_DN14773_c0_g1	NP_001236340.1	ornithine decarboxylase [Glycine max]	Glycine_max	100	4.9e-42
TRINITY_DN14777_c0_g1	XP_002968995.1	40S ribosomal protein S28 [Selaginella moellendorffii]	Selaginella_moellendorffii	81	1.5e-21
TRINITY_DN14777_c0_g2	XP_002968995.1	40S ribosomal protein S28 [Selaginella moellendorffii]	Selaginella_moellendorffii	81	1.5e-21
TRINITY_DN14777_c0_g3	XP_002968995.1	40S ribosomal protein S28 [Selaginella moellendorffii]	Selaginella_moellendorffii	80.3	1.9e-20
TRINITY_DN14785_c0_g2	XP_026665877.1	T-complex protein 1 subunit epsilon-like isoform X2 [Phoenix dactylifera]	Phoenix_dactylifera	85.1	7.1e-25
TRINITY_DN14785_c0_g3	XP_010044523.1	PREDICTED: T-complex protein 1 subunit epsilon [Eucalyptus grandis]	Eucalyptus_grandis	81.1	1.2e-25
TRINITY_DN14787_c0_g2	XP_023891139.1	eukaryotic translation initiation factor 5-like [Quercus suber]	Quercus_suber	64.4	2.5e-18
TRINITY_DN14814_c1_g1	XP_010230363.1	protein decapping 5 [Brachypodium distachyon]	Brachypodium_distachyon	79.7	9.8e-23
TRINITY_DN14817_c0_g1	NP_001237204.1	uncharacterized protein LOC100306335 [Glycine max]	Glycine_max	100	2.6e-52
TRINITY_DN14819_c0_g1	XP_017222388.1	PREDICTED: epidermis-specific secreted glycoprotein EP1-like [Daucus carota subsp. sativus]	Daucus_carota	82	1.2e-20
TRINITY_DN14847_c0_g3	XP_017242859.1	PREDICTED: RAB6-interacting golgin-like [Daucus carota subsp. sativus]	Daucus_carota	70.8	1.3e-19
TRINITY_DN14850_c0_g1	XP_017244678.1	PREDICTED: protein SMAX1-LIKE 3 [Daucus carota subsp. sativus]	Daucus_carota	75.7	1.9e-23
TRINITY_DN14850_c0_g2	XP_017244678.1	PREDICTED: protein SMAX1-LIKE 3 [Daucus carota subsp. sativus]	Daucus_carota	97.3	1.6e-30
TRINITY_DN14856_c0_g1	OWM71230.1	hypothetical protein CDL15_Pgr011357 [Punica granatum]	Punica_granatum	95.1	1.3e-12
TRINITY_DN14871_c0_g1	NP_001235594.2	FCS-like zinc-finger domain-containing protein [Glycine max]	Glycine_max	91.5	2.6e-29
TRINITY_DN14872_c0_g1	XP_013667151.1	uncharacterized protein LOC106371618 [Brassica napus]	Brassica_napus	50.7	1.5e-12
TRINITY_DN14886_c0_g2	XP_005642816.1	hypothetical protein COCSUDRAFT_20832 [Coccomyxa subellipsoidea C-169]	Coccomyxa_subellipsoidea	58.9	3.5e-25
TRINITY_DN14891_c0_g1	ACU14401.1	unknown [Glycine max]	Glycine_max	49.2	3.8e-23
TRINITY_DN14896_c0_g1	XP_015641439.1	60S ribosomal protein L39-3 [Oryza sativa Japonica Group]	Oryza_sativa	100	1.3e-22
TRINITY_DN14899_c0_g2	XP_017247904.1	PREDICTED: pentatricopeptide repeat-containing protein At1g18485 [Daucus carota subsp. sativus]	Daucus_carota	85.2	1.8e-33
TRINITY_DN14901_c0_g1	XP_015641897.1	thioredoxin-like protein Clot [Oryza sativa Japonica Group]	Oryza_sativa	100	1.5e-28
TRINITY_DN14907_c0_g2	XP_017228592.1	PREDICTED: uncharacterized protein LOC108203898 [Daucus carota subsp. sativus]	Daucus_carota	90.3	1.5e-28
TRINITY_DN14915_c0_g1	EEC84247.1	hypothetical protein OsI_30690 [Oryza sativa Indica Group]	Oryza_sativa	100	1.5e-28
TRINITY_DN14919_c0_g1	NP_001235874.1	uncharacterized protein LOC100500288 [Glycine max]	Glycine_max	100	2.1e-32
TRINITY_DN14925_c0_g1	GBG84800.1	hypothetical protein CBR_g39176 [Chara braunii]	Chara_braunii	53	9.7e-14
TRINITY_DN14931_c0_g1	AFB73912.1	polyprotein [Citrus sinensis]	Citrus_sinensis	87.5	1.8e-39
TRINITY_DN14931_c0_g3	ACL97384.1	Gag-Pol polyprotein [Medicago truncatula]	Medicago_truncatula	86.4	4.6e-47
TRINITY_DN14931_c0_g4	ACL97383.1	Gag-Pol polyprotein [Medicago truncatula]	Medicago_truncatula	74.4	9.7e-30
TRINITY_DN14934_c0_g1	XP_015640666.1	60S ribosomal protein L36-3 [Oryza sativa Japonica Group]	Oryza_sativa	100	4.1e-55
TRINITY_DN14941_c0_g1	XP_017218161.1	PREDICTED: probable xyloglucan endotransglucosylase/hydrolase protein 10 [Daucus carota subsp. sativus]	Daucus_carota	87.6	1.2e-156
TRINITY_DN14950_c0_g1	XP_027905549.1	uncharacterized protein LOC114165092 [Vigna unguiculata]	Vigna_unguiculata	63.2	4e-23
TRINITY_DN14952_c0_g1	XP_002271801.1	PREDICTED: 40S ribosomal protein S29 [Vitis vinifera]	Vitis_vinifera	100	4.5e-29
TRINITY_DN14953_c0_g1	KZM81565.1	hypothetical protein DCAR_029178 [Daucus carota subsp. sativus]	Daucus_carota	61	1.2e-38
TRINITY_DN14957_c0_g1	RZB97842.1	Mitochondrial-processing peptidase subunit alpha isoform B [Glycine soja]	Glycine_soja	97.6	5.3e-38
TRINITY_DN14963_c0_g1	ACU24176.1	unknown [Glycine max]	Glycine_max	98.5	4.4e-30
TRINITY_DN1496_c0_g1	XP_017233186.1	PREDICTED: uncharacterized protein LOC108207235 [Daucus carota subsp. sativus]	Daucus_carota	69.5	8.2e-23
TRINITY_DN14978_c0_g2	XP_017255915.1	PREDICTED: uncharacterized protein LOC108225537 [Daucus carota subsp. sativus]	Daucus_carota	80	4.5e-26
TRINITY_DN14986_c0_g1	RXH82632.1	hypothetical protein DVH24_002404 [Malus domestica]	Malus_domestica	44.9	2.1e-15
TRINITY_DN14986_c0_g2	XP_002986838.1	1-acyl-sn-glycerol-3-phosphate acyltransferase 2 [Selaginella moellendorffii]	Selaginella_moellendorffii	49	7.5e-06
TRINITY_DN14988_c0_g1	KVH88658.1	Ribosomal protein L39e [Cynara cardunculus var. scolymus]	Cynara_cardunculus	76.4	1.9e-16
TRINITY_DN1498_c0_g1	XP_017228355.1	PREDICTED: uncharacterized protein LOC108203735 [Daucus carota subsp. sativus]	Daucus_carota	52.4	1e-18
TRINITY_DN14999_c0_g1	EAZ09699.1	hypothetical protein OsI_31983 [Oryza sativa Indica Group]	Oryza_sativa	100	9.7e-54
TRINITY_DN15005_c0_g1	EEC80490.1	hypothetical protein OsI_22734 [Oryza sativa Indica Group]	Oryza_sativa	100	7.9e-23
TRINITY_DN15010_c0_g1	KDD73940.1	lactate/malate dehydrogenase [Helicosporidium sp. ATCC 50920]	Helicosporidium_sp._ATCC_50920	64.5	6.9e-30
TRINITY_DN15020_c0_g1	XP_017242764.1	PREDICTED: uncharacterized protein LOC108214987 isoform X1 [Daucus carota subsp. sativus]	Daucus_carota	83.9	8.3e-156
TRINITY_DN15038_c0_g1	XP_027936485.1	two-component response regulator-like APRR7 isoform X1 [Vigna unguiculata]	Vigna_unguiculata	87.3	9.1e-27
TRINITY_DN15040_c0_g1	GAQ82548.1	hypothetical protein KFL_001150080 [Klebsormidium nitens]	Klebsormidium_nitens	43.2	5.3e-11
TRINITY_DN15048_c0_g1	XP_017238710.1	PREDICTED: heavy metal-associated isoprenylated plant protein 3-like [Daucus carota subsp. sativus]	Daucus_carota	50.2	6.2e-34
TRINITY_DN1504_c0_g1	XP_015632277.1	nuclear/nucleolar GTPase 2 [Oryza sativa Japonica Group]	Oryza_sativa	100	5.7e-40
TRINITY_DN15053_c0_g1	XP_017227000.1	PREDICTED: protein CROWDED NUCLEI 2-like [Daucus carota subsp. sativus]	Daucus_carota	69.6	5.7e-09
TRINITY_DN15063_c0_g1	XP_015615004.1	coatomer subunit beta-2 [Oryza sativa Japonica Group]	Oryza_sativa	100	4.7e-32
TRINITY_DN15063_c0_g2	XP_017699988.1	coatomer subunit beta-1 [Phoenix dactylifera]	Phoenix_dactylifera	100	5.8e-37
TRINITY_DN15063_c0_g3	EAY73532.1	hypothetical protein OsI_01415 [Oryza sativa Indica Group]	Oryza_sativa	100	1.7e-32
TRINITY_DN15064_c0_g1	XP_017243865.1	PREDICTED: universal stress protein A-like protein [Daucus carota subsp. sativus]	Daucus_carota	75.1	2.3e-80
TRINITY_DN15065_c0_g1	XP_015623914.1	uncharacterized protein LOC4328180 isoform X10 [Oryza sativa Japonica Group]	Oryza_sativa	96.6	4.4e-21
TRINITY_DN15065_c0_g2	XP_025883168.1	uncharacterized protein LOC107275885 isoform X2 [Oryza sativa Japonica Group]	Oryza_sativa	94.5	6.1e-30
TRINITY_DN15065_c0_g3	AAK91321.1	Unknown protein [Oryza sativa Japonica Group]	Oryza_sativa	100	2.9e-38
TRINITY_DN15065_c0_g4	BAF07688.1	Os02g0129000 [Oryza sativa Japonica Group]	Oryza_sativa	95.9	7.3e-31
TRINITY_DN15075_c0_g1	XP_017245559.1	PREDICTED: uncharacterized protein LOC108217231 [Daucus carota subsp. sativus]	Daucus_carota	58	1.4e-33
TRINITY_DN15078_c0_g1	XP_017239586.1	PREDICTED: uncharacterized protein LOC108212372 [Daucus carota subsp. sativus]	Daucus_carota	50	1.6e-08
TRINITY_DN15079_c0_g1	GAX82224.1	hypothetical protein CEUSTIGMA_g9652.t1 [Chlamydomonas eustigma]	Chlamydomonas_eustigma	54.2	5.6e-12
TRINITY_DN15083_c0_g1	RZB64397.1	Obg-like ATPase 1 isoform B [Glycine soja]	Glycine_soja	100	2.7e-43
TRINITY_DN15089_c0_g1	XP_017240622.1	PREDICTED: U-box domain-containing protein 21-like [Daucus carota subsp. sativus]	Daucus_carota	77.6	9.4e-191
TRINITY_DN15091_c0_g1	KHN35403.1	Cytochrome b5 isoform 1 [Glycine soja]	Glycine_soja	100	1.6e-33
TRINITY_DN15092_c0_g1	AAO72619.1	unknown, partial [Oryza sativa Japonica Group]	Oryza_sativa	100	2.9e-36
TRINITY_DN15099_c0_g1	XP_027332903.1	protein transport protein Sec61 subunit gamma isoform X1 [Abrus precatorius]	Abrus_precatorius	87.4	2.3e-36
TRINITY_DN15100_c0_g1	XP_003545484.2	fasciclin-like arabinogalactan protein 2 [Glycine max]	Glycine_max	99.1	1.7e-52
TRINITY_DN15105_c1_g1	OTG36085.1	putative nucleotide-binding alpha-beta plait domain-containing protein [Helianthus annuus]	Helianthus_annuus	48.6	7.5e-13
TRINITY_DN15112_c0_g1	XP_017226058.1	PREDICTED: uncharacterized protein LOC108202184 [Daucus carota subsp. sativus]	Daucus_carota	55.7	2.7e-20
TRINITY_DN15114_c0_g1	XP_017240794.1	PREDICTED: auxin-responsive protein SAUR36-like [Daucus carota subsp. sativus]	Daucus_carota	82.6	4.8e-69
TRINITY_DN15131_c0_g1	XP_017239012.1	PREDICTED: uncharacterized protein LOC108211827 [Daucus carota subsp. sativus]	Daucus_carota	72.7	2.4e-44
TRINITY_DN15131_c0_g2	XP_017239012.1	PREDICTED: uncharacterized protein LOC108211827 [Daucus carota subsp. sativus]	Daucus_carota	87	1.9e-12
TRINITY_DN15133_c0_g1	XP_021772359.1	uncharacterized protein LOC110736418 [Chenopodium quinoa]	Chenopodium_quinoa	78.2	2.3e-30
TRINITY_DN15140_c0_g1	XP_008648952.1	probable alpha-glucosidase Os06g0675700 isoform X2 [Zea mays]	Zea_mays	60.7	2.7e-16
TRINITY_DN15143_c0_g1	ABC86745.1	pollen-specific protein [Vitis pseudoreticulata]	Vitis_pseudoreticulata	68.8	9.2e-40
TRINITY_DN15144_c0_g2	XP_017215812.1	PREDICTED: haloalkane dehalogenase [Daucus carota subsp. sativus]	Daucus_carota	47.9	4.2e-09
TRINITY_DN15146_c1_g1	EXB28928.1	hypothetical protein L484_012687 [Morus notabilis]	Morus_notabilis	55.9	7.5e-17
TRINITY_DN15147_c0_g1	XP_017216811.1	PREDICTED: glutaredoxin-C13 [Daucus carota subsp. sativus]	Daucus_carota	90.3	4.5e-46
TRINITY_DN15151_c0_g1	KHN44271.1	hypothetical protein glysoja_024491 [Glycine soja]	Glycine_soja	100	9.7e-34
TRINITY_DN15162_c0_g5	XP_017228100.1	PREDICTED: uncharacterized mitochondrial protein AtMg00810-like [Daucus carota subsp. sativus]	Daucus_carota	76.9	4.8e-55
TRINITY_DN15162_c0_g6	RVW63782.1	Retrovirus-related Pol polyprotein from transposon TNT 1-94 [Vitis vinifera]	Vitis_vinifera	60	1.2e-21
TRINITY_DN15162_c0_g7	XP_020258980.1	uncharacterized protein LOC109835417 [Asparagus officinalis]	Asparagus_officinalis	55.9	2.1e-16
TRINITY_DN15163_c0_g1	XP_016472485.1	PREDICTED: leucine-rich repeat extensin-like protein 4, partial [Nicotiana tabacum]	Nicotiana_tabacum	83.6	2e-19
TRINITY_DN15163_c0_g2	XP_017257426.1	PREDICTED: leucine-rich repeat extensin-like protein 4 [Daucus carota subsp. sativus]	Daucus_carota	67.9	2.5e-22
TRINITY_DN15169_c0_g3	XP_017256106.1	PREDICTED: uncharacterized protein LOC108225688 [Daucus carota subsp. sativus]	Daucus_carota	57	1.3e-21
TRINITY_DN15180_c0_g1	BAT10823.1	Os10g0412100, partial [Oryza sativa Japonica Group]	Oryza_sativa	98.8	1.7e-42
TRINITY_DN15181_c0_g1	XP_017240538.1	PREDICTED: replication protein A 14 kDa subunit B [Daucus carota subsp. sativus]	Daucus_carota	88.7	1.3e-49
TRINITY_DN15188_c0_g1	XP_017222879.1	PREDICTED: probable ascorbate-specific transmembrane electron transporter 1 [Daucus carota subsp. sativus]	Daucus_carota	83.7	4.9e-97
TRINITY_DN15191_c0_g1	KHN16100.1	hypothetical protein glysoja_012076 [Glycine soja]	Glycine_soja	100	2.7e-44
TRINITY_DN15195_c0_g1	RZC07829.1	Ribonuclease TUDOR 1 isoform B [Glycine soja]	Glycine_soja	100	4e-41
TRINITY_DN15196_c0_g1	XP_017217010.1	PREDICTED: uncharacterized protein LOC108194558 [Daucus carota subsp. sativus]	Daucus_carota	81.5	4.1e-52
TRINITY_DN15197_c0_g2	KZM92990.1	hypothetical protein DCAR_016235 [Daucus carota subsp. sativus]	Daucus_carota	88.3	1.5e-34
TRINITY_DN15203_c0_g1	XP_017233621.1	PREDICTED: uncharacterized protein LOC108207697 [Daucus carota subsp. sativus]	Daucus_carota	77.9	2e-68
TRINITY_DN15207_c0_g1	XP_017238542.1	PREDICTED: uncharacterized protein LOC108211449 [Daucus carota subsp. sativus]	Daucus_carota	63.6	4.2e-15
TRINITY_DN15208_c0_g1	XP_017227963.1	PREDICTED: pentatricopeptide repeat-containing protein At1g61870, mitochondrial [Daucus carota subsp. sativus]	Daucus_carota	80	4e-91
TRINITY_DN15212_c0_g1	ADK26058.1	drought resistance protein [Glycine max]	Glycine_max	100	5.4e-48
TRINITY_DN15213_c0_g2	XP_017248020.1	PREDICTED: ethylene-responsive transcription factor 5-like [Daucus carota subsp. sativus]	Daucus_carota	57	3e-55
TRINITY_DN15223_c0_g1	XP_020152975.1	serine/arginine-rich-splicing factor SR34 isoform X1 [Aegilops tauschii subsp. tauschii]	Aegilops_tauschii	69.6	1.2e-25
TRINITY_DN15224_c1_g1	OAE26634.1	hypothetical protein AXG93_4542s1550 [Marchantia polymorpha subsp. ruderalis]	Marchantia_polymorpha	73.2	4.2e-34
TRINITY_DN15224_c1_g2	XP_024397798.1	uncharacterized protein LOC112293001, partial [Physcomitrella patens]	Physcomitrella_patens	72.1	9.7e-37
TRINITY_DN15224_c1_g3	XP_024379173.1	40S ribosomal protein S26-1-like [Physcomitrella patens]	Physcomitrella_patens	71.2	3.6e-37
TRINITY_DN15229_c0_g1	RZB83651.1	Peroxisome biogenesis protein 22 isoform B [Glycine soja]	Glycine_soja	100	2.7e-30
TRINITY_DN1522_c0_g1	RZB56707.1	Bifunctional dTDP-4-dehydrorhamnose 3,5-epimerase/dTDP-4-dehydrorhamnose reductase [Glycine soja]	Glycine_soja	100	8.8e-34
TRINITY_DN15237_c0_g1	KZN08708.1	hypothetical protein DCAR_001364 [Daucus carota subsp. sativus]	Daucus_carota	74.7	7e-67
TRINITY_DN15237_c0_g2	KZN08708.1	hypothetical protein DCAR_001364 [Daucus carota subsp. sativus]	Daucus_carota	75.1	2.9e-73
TRINITY_DN1523_c0_g1	XP_015626162.1	light-harvesting complex-like protein 3 isotype 2, chloroplastic [Oryza sativa Japonica Group]	Oryza_sativa	100	6e-29
TRINITY_DN15249_c0_g3	EAZ03172.1	hypothetical protein OsI_25325 [Oryza sativa Indica Group]	Oryza_sativa	100	1.3e-51
TRINITY_DN15254_c0_g1	XP_005850277.1	hypothetical protein CHLNCDRAFT_142000 [Chlorella variabilis]	Chlorella_variabilis	53.6	1.4e-07
TRINITY_DN15260_c0_g1	PSR91577.1	Lipid transfer protein EARLI 1 like [Actinidia chinensis var. chinensis]	Actinidia_chinensis	61.3	2.4e-39
TRINITY_DN15264_c0_g1	XP_015620714.1	60S ribosomal protein L24 [Oryza sativa Japonica Group]	Oryza_sativa	100	1.6e-64
TRINITY_DN15269_c0_g1	KZM83305.1	hypothetical protein DCAR_030874 [Daucus carota subsp. sativus]	Daucus_carota	56.4	5.8e-35
TRINITY_DN15270_c0_g1	KZN07091.1	hypothetical protein DCAR_007928 [Daucus carota subsp. sativus]	Daucus_carota	69.9	7e-16
TRINITY_DN15271_c0_g1	XP_004958491.1	trafficking protein particle complex subunit 3 [Setaria italica]	Setaria_italica	100	3.8e-48
TRINITY_DN15274_c0_g2	KXZ44536.1	hypothetical protein GPECTOR_65g154 [Gonium pectorale]	Gonium_pectorale	86.1	5.8e-30
TRINITY_DN15274_c0_g3	GAQ84803.1	eukaryotic translation initiation factor 2 subunit gamma [Klebsormidium nitens]	Klebsormidium_nitens	77.1	4.8e-31
TRINITY_DN15279_c0_g1	XP_017227681.1	PREDICTED: tetrahydrocannabinolic acid synthase-like [Daucus carota subsp. sativus]	Daucus_carota	53.9	8.8e-10
TRINITY_DN15280_c0_g2	XP_023156775.1	uncharacterized protein LOC542155 isoform X1 [Zea mays]	Zea_mays	100	1.7e-35
TRINITY_DN15285_c0_g1	PNH05668.1	40S ribosomal protein S30 [Tetrabaena socialis]	Tetrabaena_socialis	76.3	1.1e-16
TRINITY_DN15291_c0_g1	XP_017216110.1	PREDICTED: uncharacterized protein LOC108193800 [Daucus carota subsp. sativus]	Daucus_carota	97.2	9.8e-53
TRINITY_DN15292_c0_g1	XP_003524856.1	uncharacterized protein LOC100777797 [Glycine max]	Glycine_max	100	4.2e-17
TRINITY_DN15296_c0_g1	XP_017245316.1	PREDICTED: uncharacterized protein LOC108216967 [Daucus carota subsp. sativus]	Daucus_carota	61.2	6.8e-22
TRINITY_DN15300_c0_g3	RYR30370.1	hypothetical protein Ahy_B01g055146 [Arachis hypogaea]	Arachis_hypogaea	84.6	6.1e-21
TRINITY_DN15323_c0_g1	XP_023875099.1	ATP-dependent RNA helicase DED1-like [Quercus suber]	Quercus_suber	75.8	2.2e-18
TRINITY_DN15324_c1_g1	BAJ86547.1	predicted protein, partial [Hordeum vulgare subsp. vulgare]	Hordeum_vulgare	62.9	3.8e-08
TRINITY_DN15324_c1_g2	XP_003571754.1	far upstream element-binding protein 1 [Brachypodium distachyon]	Brachypodium_distachyon	86.7	1.7e-06
TRINITY_DN15326_c0_g1	XP_015632787.1	zinc finger CCCH domain-containing protein 23 [Oryza sativa Japonica Group]	Oryza_sativa	100	5.5e-33
TRINITY_DN15328_c0_g2	XP_017257376.1	PREDICTED: GDSL esterase/lipase At4g10955-like [Daucus carota subsp. sativus]	Daucus_carota	85.1	5.9e-27
TRINITY_DN15334_c0_g1	XP_017250176.1	PREDICTED: ubiquitin-like protein 5 [Daucus carota subsp. sativus]	Daucus_carota	100	5.9e-35
TRINITY_DN15335_c0_g1	XP_015632123.1	zinc finger BED domain-containing protein RICESLEEPER 2 [Oryza sativa Japonica Group]	Oryza_sativa	100	1.2e-33
TRINITY_DN15335_c0_g2	XP_015632123.1	zinc finger BED domain-containing protein RICESLEEPER 2 [Oryza sativa Japonica Group]	Oryza_sativa	100	9.7e-34
TRINITY_DN15339_c0_g1	XP_022959485.1	60S ribosomal protein L29-1-like [Cucurbita moschata]	Cucurbita_moschata	78.6	4.3e-16
TRINITY_DN15339_c0_g2	XP_022959485.1	60S ribosomal protein L29-1-like [Cucurbita moschata]	Cucurbita_moschata	72.1	2.5e-16
TRINITY_DN15339_c0_g3	XP_023514068.1	60S ribosomal protein L29-1-like [Cucurbita pepo subsp. pepo]	Cucurbita_pepo	79.2	5.4e-15
TRINITY_DN15339_c0_g4	AFK48186.1	unknown [Lotus japonicus]	Lotus_japonicus	67.2	1e-14
TRINITY_DN15345_c0_g1	XP_027065418.1	DNA-directed RNA polymerase I subunit 1 isoform X3 [Coffea arabica]	Coffea_arabica	64.6	1.8e-25
TRINITY_DN15346_c0_g1	XP_017237637.1	PREDICTED: chloroplast processing peptidase [Daucus carota subsp. sativus]	Daucus_carota	63.4	2.1e-25
TRINITY_DN15349_c0_g1	XP_017242956.1	PREDICTED: mediator of RNA polymerase II transcription subunit 11 [Daucus carota subsp. sativus]	Daucus_carota	87.8	5.8e-53
TRINITY_DN15350_c0_g1	XP_017233835.1	PREDICTED: inorganic pyrophosphatase 1 [Daucus carota subsp. sativus]	Daucus_carota	77.1	4.6e-125
TRINITY_DN15354_c0_g1	XP_015643087.1	protein transport protein Sec61 subunit gamma-like [Oryza sativa Japonica Group]	Oryza_sativa	71.6	4.4e-20
TRINITY_DN15357_c0_g1	XP_017251699.1	PREDICTED: non-specific lipid-transfer protein-like protein At2g13820 [Daucus carota subsp. sativus]	Daucus_carota	75	2.8e-54
TRINITY_DN15363_c0_g1	RZB44267.1	Eukaryotic translation initiation factor 5B isoform A [Glycine soja]	Glycine_soja	100	4.4e-10
TRINITY_DN15363_c0_g2	RZB44267.1	Eukaryotic translation initiation factor 5B isoform A [Glycine soja]	Glycine_soja	100	9.8e-36
TRINITY_DN15368_c0_g2	RZB96523.1	GBF-interacting protein 1-like isoform B [Glycine soja]	Glycine_soja	98.5	1.7e-29
TRINITY_DN15371_c0_g1	KOM35035.1	hypothetical protein LR48_Vigan02g118500, partial [Vigna angularis]	Vigna_angularis	88.5	6.6e-30
TRINITY_DN15374_c0_g1	XP_017237801.1	PREDICTED: protein SLOW GREEN 1, chloroplastic [Daucus carota subsp. sativus]	Daucus_carota	66.7	2.7e-115
TRINITY_DN15375_c0_g1	XP_017229025.1	PREDICTED: uncharacterized protein LOC108204207, partial [Daucus carota subsp. sativus]	Daucus_carota	40.7	2.7e-11
TRINITY_DN15376_c0_g1	KZN01064.1	hypothetical protein DCAR_009818 [Daucus carota subsp. sativus]	Daucus_carota	68.5	2.1e-39
TRINITY_DN15380_c0_g1	XP_017249942.1	PREDICTED: uncharacterized protein LOC108220641 [Daucus carota subsp. sativus]	Daucus_carota	68.7	1.8e-34
TRINITY_DN15394_c0_g1	ACU22915.1	unknown [Glycine max]	Glycine_max	100	1.2e-30
TRINITY_DN15396_c0_g1	XP_002955585.1	hypothetical protein VOLCADRAFT_106866 [Volvox carteri f. nagariensis]	Volvox_carteri	51.9	1.1e-11
TRINITY_DN15398_c0_g1	XP_017219057.1	PREDICTED: cysteine proteinase inhibitor 1-like [Daucus carota subsp. sativus]	Daucus_carota	64.8	5.1e-33
TRINITY_DN15399_c0_g1	XP_017251224.1	PREDICTED: ATP-dependent DNA helicase PIF1-like [Daucus carota subsp. sativus]	Daucus_carota	83.3	5.6e-70
TRINITY_DN15406_c0_g1	KZM90545.1	hypothetical protein DCAR_022090 [Daucus carota subsp. sativus]	Daucus_carota	88.5	1.3e-133
TRINITY_DN15409_c0_g1	AAK52114.1	Putative alanine aminotransferase [Oryza sativa Japonica Group]	Oryza_sativa	100	1.3e-32
TRINITY_DN15426_c0_g1	RZC30514.1	Aminopeptidase P1 isoform C [Glycine soja]	Glycine_soja	100	1.7e-38
TRINITY_DN15429_c0_g1	BAJ92600.1	predicted protein [Hordeum vulgare subsp. vulgare]	Hordeum_vulgare	83.3	2.5e-35
TRINITY_DN15440_c0_g1	NP_001236099.1	uncharacterized protein LOC100499791 [Glycine max]	Glycine_max	100	9.6e-40
TRINITY_DN15443_c0_g2	XP_017232166.1	PREDICTED: uncharacterized protein LOC108206396 [Daucus carota subsp. sativus]	Daucus_carota	78	1.2e-36
TRINITY_DN15446_c0_g1	BAJ91724.1	predicted protein [Hordeum vulgare subsp. vulgare]	Hordeum_vulgare	64.6	3e-16
TRINITY_DN15449_c0_g2	KZN02341.1	hypothetical protein DCAR_011095 [Daucus carota subsp. sativus]	Daucus_carota	88.8	2e-37
TRINITY_DN15458_c0_g2	RWR89740.1	AP-2 complex subunit mu [Cinnamomum micranthum f. kanehirae]	Cinnamomum_micranthum	60.8	4.3e-21
TRINITY_DN15459_c0_g1	KZM90157.1	hypothetical protein DCAR_022478 [Daucus carota subsp. sativus]	Daucus_carota	65.7	2.2e-12
TRINITY_DN15484_c0_g1	EYU44426.1	hypothetical protein MIMGU_mgv1a0153482mg, partial [Erythranthe guttata]	Erythranthe_guttata	68.9	6.3e-24
TRINITY_DN15485_c0_g1	XP_017255417.1	PREDICTED: malignant T-cell-amplified sequence 1 [Daucus carota subsp. sativus]	Daucus_carota	73.4	3.9e-90
TRINITY_DN15486_c0_g2	XP_023910481.1	T-complex protein 1 subunit delta-like [Quercus suber]	Quercus_suber	72.9	3.2e-20
TRINITY_DN15488_c0_g1	KZM97802.1	hypothetical protein DCAR_014836 [Daucus carota subsp. sativus]	Daucus_carota	77	1e-72
TRINITY_DN15490_c0_g1	RZC20921.1	Cytochrome P450 94A1 [Glycine soja]	Glycine_soja	100	6.4e-42
TRINITY_DN15491_c1_g1	BAT16199.1	Os12g0190000, partial [Oryza sativa Japonica Group]	Oryza_sativa	100	7.4e-40
TRINITY_DN15501_c0_g2	NP_001237990.1	proteasome beta subunit C1 [Glycine max]	Glycine_max	100	6.6e-33
TRINITY_DN15503_c0_g1	AAR13298.1	gag-pol polyprotein [Phaseolus vulgaris]	Phaseolus_vulgaris	72.7	5.2e-27
TRINITY_DN15509_c0_g1	AFK43759.1	unknown [Lotus japonicus]	Lotus_japonicus	48.8	2.7e-18
TRINITY_DN15526_c0_g1	NP_001336560.1	60S ribosomal protein L34 [Glycine max]	Glycine_max	100	1e-58
TRINITY_DN15533_c0_g2	RZB99541.1	putative methyltransferase PMT2 isoform F [Glycine soja]	Glycine_soja	97.1	1.9e-36
TRINITY_DN15543_c0_g5	XP_005849733.1	hypothetical protein CHLNCDRAFT_20835, partial [Chlorella variabilis]	Chlorella_variabilis	41.9	2.8e-13
TRINITY_DN15548_c0_g1	ACU14423.1	unknown, partial [Glycine max]	Glycine_max	82.7	2.2e-29
TRINITY_DN15549_c0_g1	BAK02186.1	predicted protein [Hordeum vulgare subsp. vulgare]	Hordeum_vulgare	80.4	2.7e-79
TRINITY_DN15549_c0_g2	BAK02186.1	predicted protein [Hordeum vulgare subsp. vulgare]	Hordeum_vulgare	94.2	7.7e-40
TRINITY_DN15553_c0_g1	KHN39481.1	U-box domain-containing protein 20 [Glycine soja]	Glycine_soja	100	5.3e-34
TRINITY_DN15556_c0_g1	XP_017231672.1	PREDICTED: 50S ribosomal protein L11, chloroplastic [Daucus carota subsp. sativus]	Daucus_carota	86.3	4.4e-85
TRINITY_DN15566_c0_g3	KZM91717.1	hypothetical protein DCAR_020918 [Daucus carota subsp. sativus]	Daucus_carota	85.1	1.3e-40
TRINITY_DN15576_c0_g2	GAX73611.1	hypothetical protein CEUSTIGMA_g1062.t1 [Chlamydomonas eustigma]	Chlamydomonas_eustigma	44.7	2.7e-10
TRINITY_DN15577_c0_g1	A2WZT1.1	RecName: Full=Ferredoxin--NADP reductase, leaf isozyme 2, chloroplastic; AltName: Full=Leaf FNR 2; Short=FNR-2; Short=Os-LFNR2; Flags: Precursor	Oryza_sativa	100	2e-33
TRINITY_DN15586_c0_g1	XP_006598806.1	dihydrolipoyllysine-residue acetyltransferase component 2 of pyruvate dehydrogenase complex, mitochondrial isoform X2 [Glycine max]	Glycine_max	100	9.7e-40
TRINITY_DN15586_c0_g3	XP_006598806.1	dihydrolipoyllysine-residue acetyltransferase component 2 of pyruvate dehydrogenase complex, mitochondrial isoform X2 [Glycine max]	Glycine_max	100	2.1e-35
TRINITY_DN15587_c0_g2	EEC80339.1	hypothetical protein OsI_22408 [Oryza sativa Indica Group]	Oryza_sativa	100	7.9e-33
TRINITY_DN15587_c0_g3	EEC80339.1	hypothetical protein OsI_22408 [Oryza sativa Indica Group]	Oryza_sativa	100	3.2e-31
TRINITY_DN15590_c0_g1	RZC31044.1	hypothetical protein D0Y65_002173 [Glycine soja]	Glycine_soja	100	5.9e-40
TRINITY_DN15599_c1_g1	XP_017249078.1	PREDICTED: palmitoyl-monogalactosyldiacylglycerol delta-7 desaturase, chloroplastic-like [Daucus carota subsp. sativus]	Daucus_carota	70.3	4.1e-28
TRINITY_DN15602_c0_g1	BAS96642.1	Os06g0199200, partial [Oryza sativa Japonica Group]	Oryza_sativa	100	6e-34
TRINITY_DN15605_c0_g1	XP_004985073.1	transmembrane 9 superfamily member 3 [Setaria italica]	Setaria_italica	100	8.3e-33
TRINITY_DN15606_c0_g1	XP_023894262.1	phosphoglycerate kinase-like [Quercus suber]	Quercus_suber	73.5	3.7e-21
TRINITY_DN15610_c0_g2	XP_023926123.1	6-phosphogluconate dehydrogenase, decarboxylating 1-like [Quercus suber]	Quercus_suber	64.7	3.5e-31
TRINITY_DN15612_c0_g1	KZM99927.1	hypothetical protein DCAR_008682 [Daucus carota subsp. sativus]	Daucus_carota	81.4	4.8e-135
TRINITY_DN15613_c0_g1	NP_001351616.1	uncharacterized protein LOC100527077 [Glycine max]	Glycine_max	100	6.7e-09
TRINITY_DN15617_c0_g1	XP_023915195.1	LOW QUALITY PROTEIN: alkaline protease 2-like [Quercus suber]	Quercus_suber	52.6	3.4e-22
TRINITY_DN15620_c0_g1	XP_003533898.2	cellulose synthase A catalytic subunit 3 [UDP-forming] [Glycine max]	Glycine_max	100	1.1e-36
TRINITY_DN15629_c0_g1	KHN18029.1	Coatomer subunit beta'-2 [Glycine soja]	Glycine_soja	100	4.5e-43
TRINITY_DN15636_c1_g2	XP_002499844.1	alpha-2 macroglobulin family-like protein [Micromonas commoda]	Micromonas_commoda	40.3	7.5e-23
TRINITY_DN15639_c0_g1	PSS04496.1	60S acidic ribosomal protein like, partial [Actinidia chinensis var. chinensis]	Actinidia_chinensis	64.2	3.3e-16
TRINITY_DN15639_c0_g2	XP_001694856.1	acidic ribosomal protein P2 [Chlamydomonas reinhardtii]	Chlamydomonas_reinhardtii	61.2	5.8e-14
TRINITY_DN15639_c0_g3	PSC76694.1	60S acidic ribosomal P2 [Micractinium conductrix]	Micractinium_conductrix	63.2	2.1e-14
TRINITY_DN15643_c0_g1	XP_017252121.1	PREDICTED: calvin cycle protein CP12-1, chloroplastic [Daucus carota subsp. sativus]	Daucus_carota	72.7	2.4e-45
TRINITY_DN15644_c0_g2	XP_003058525.1	predicted protein [Micromonas pusilla CCMP1545]	Micromonas_pusilla	52.2	9.2e-12
TRINITY_DN15657_c0_g1	XP_017254327.1	PREDICTED: S-norcoclaurine synthase 2-like [Daucus carota subsp. sativus]	Daucus_carota	69.2	3.2e-32
TRINITY_DN15657_c0_g2	KZM92218.1	hypothetical protein DCAR_020417 [Daucus carota subsp. sativus]	Daucus_carota	72.7	1.3e-14
TRINITY_DN15659_c0_g1	BAJ87685.1	predicted protein [Hordeum vulgare subsp. vulgare]	Hordeum_vulgare	75	1.4e-20
TRINITY_DN15659_c0_g2	AIZ74337.1	eukaryotic initiation factor 4A-II-like protein, partial [Pinus massoniana]	Pinus_massoniana	86.3	1.4e-29
TRINITY_DN15659_c0_g3	XP_027351203.1	eukaryotic initiation factor 4A-8 isoform X2 [Abrus precatorius]	Abrus_precatorius	77.4	7.3e-40
TRINITY_DN15661_c0_g1	ACU15756.1	unknown, partial [Glycine max]	Glycine_max	100	1.6e-16
TRINITY_DN15671_c0_g1	XP_003554077.1	uncharacterized protein LOC100305508 [Glycine max]	Glycine_max	100	2.6e-40
TRINITY_DN15673_c0_g1	ACU14353.1	unknown [Glycine max]	Glycine_max	99	5.9e-49
TRINITY_DN15681_c0_g1	GAQ85610.1	Nucleolar GTP-binding protein [Klebsormidium nitens]	Klebsormidium_nitens	73.7	1.5e-26
TRINITY_DN15682_c0_g1	KZN07406.1	hypothetical protein DCAR_008243 [Daucus carota subsp. sativus]	Daucus_carota	83.7	7.2e-40
TRINITY_DN15688_c0_g1	NP_001236216.2	40S ribosomal protein S19 [Glycine max]	Glycine_max	100	1.6e-69
TRINITY_DN15690_c0_g1	ACU17881.1	unknown [Glycine max]	Glycine_max	100	4.7e-35
TRINITY_DN15690_c0_g3	KHN44154.1	hypothetical protein glysoja_031815 [Glycine soja]	Glycine_soja	100	3.1e-43
TRINITY_DN15695_c0_g1	NP_001276294.1	uncharacterized protein LOC100796900 [Glycine max]	Glycine_max	100	7.4e-33
TRINITY_DN15696_c1_g1	BAK00385.1	predicted protein [Hordeum vulgare subsp. vulgare]	Hordeum_vulgare	75.3	9.6e-31
TRINITY_DN15696_c1_g2	XP_003057685.1	predicted protein [Micromonas pusilla CCMP1545]	Micromonas_pusilla	91.1	1.3e-66
TRINITY_DN15702_c0_g3	CAE05728.2	OSJNBb0017I01.8 [Oryza sativa Japonica Group]	Oryza_sativa	100	5.3e-08
TRINITY_DN15704_c0_g5	XP_017222282.1	PREDICTED: U-box domain-containing protein 1-like isoform X1 [Daucus carota subsp. sativus]	Daucus_carota	63.8	5.3e-15
TRINITY_DN1570_c0_g1	AAA33946.1	beta-1,3-endoglucanase (EC 3.2.1.39) [Glycine max]	Glycine_max	100	4.1e-109
TRINITY_DN1570_c0_g2	ACU23690.1	unknown [Glycine max]	Glycine_max	100	6e-78
TRINITY_DN15715_c0_g1	XP_017225837.1	PREDICTED: uncharacterized protein LOC108201993 [Daucus carota subsp. sativus]	Daucus_carota	65	3.9e-146
TRINITY_DN1571_c0_g1	RLN00322.1	hypothetical protein C2845_PM06G30880 [Panicum miliaceum]	Panicum_miliaceum	91.5	3.7e-31
TRINITY_DN15721_c0_g1	XP_017256956.1	PREDICTED: mitochondrial import inner membrane translocase subunit TIM8-like [Daucus carota subsp. sativus]	Daucus_carota	88.5	7.6e-34
TRINITY_DN15723_c0_g1	KVH94993.1	Ribosomal protein S21e [Cynara cardunculus var. scolymus]	Cynara_cardunculus	54.9	5.9e-20
TRINITY_DN15725_c0_g1	XP_016575503.1	PREDICTED: uncharacterized protein LOC107873252 [Capsicum annuum]	Capsicum_annuum	87.2	1.7e-14
TRINITY_DN15740_c0_g2	KZM82610.1	hypothetical protein DCAR_030179 [Daucus carota subsp. sativus]	Daucus_carota	72.7	4.1e-32
TRINITY_DN15746_c0_g1	XP_017227904.1	PREDICTED: importin subunit alpha-1-like [Daucus carota subsp. sativus]	Daucus_carota	41.6	5e-21
TRINITY_DN15747_c0_g2	RZB45209.1	putative UDP-N-acetylglucosamine--peptide N-acetylglucosaminyltransferase SEC isoform B [Glycine soja]	Glycine_soja	100	2.1e-36
TRINITY_DN15755_c1_g7	KHN25274.1	Beta-glucosidase 24 [Glycine soja]	Glycine_soja	100	4.5e-33
TRINITY_DN15760_c0_g1	Q0DN94.1	RecName: Full=10 kDa prolamin; Flags: Precursor	Oryza_sativa	98.5	1.1e-57
TRINITY_DN15762_c0_g1	RZC21078.1	Activating molecule in BECN1-regulated autophagy protein 1 isoform A [Glycine soja]	Glycine_soja	100	3.7e-30
TRINITY_DN15762_c1_g1	RZC21078.1	Activating molecule in BECN1-regulated autophagy protein 1 isoform A [Glycine soja]	Glycine_soja	100	1.8e-31
TRINITY_DN15763_c0_g1	NP_001235057.1	uncharacterized protein LOC100305671 [Glycine max]	Glycine_max	100	1.1e-56
TRINITY_DN15764_c0_g1	XP_021887986.1	trihelix transcription factor ASR3 [Carica papaya]	Carica_papaya	64.1	5e-95
TRINITY_DN15769_c0_g1	RZB93560.1	KH domain-containing protein isoform H [Glycine soja]	Glycine_soja	98.5	7.1e-28
TRINITY_DN15773_c0_g1	KZM96471.1	hypothetical protein DCAR_019713 [Daucus carota subsp. sativus]	Daucus_carota	93.3	4.2e-34
TRINITY_DN15773_c0_g2	KZM96471.1	hypothetical protein DCAR_019713 [Daucus carota subsp. sativus]	Daucus_carota	69.6	3.9e-30
TRINITY_DN15773_c0_g5	KZM96471.1	hypothetical protein DCAR_019713 [Daucus carota subsp. sativus]	Daucus_carota	84.2	2.4e-29
TRINITY_DN15775_c0_g1	PON56557.1	Splicing factor-like protein [Trema orientale]	Trema_orientale	64.7	3.7e-29
TRINITY_DN15778_c0_g1	XP_023871922.1	translationally-controlled tumor protein homolog [Quercus suber]	Quercus_suber	45.7	6.7e-30
TRINITY_DN1577_c0_g1	CAH65949.1	H0716A07.7 [Oryza sativa]	Oryza_sativa	100	1.3e-10
TRINITY_DN15788_c0_g2	XP_017256546.1	PREDICTED: benzyl alcohol O-benzoyltransferase-like [Daucus carota subsp. sativus]	Daucus_carota	73.3	4.2e-16
TRINITY_DN15790_c0_g1	XP_017233365.1	PREDICTED: mavicyanin-like [Daucus carota subsp. sativus]	Daucus_carota	85.4	7.5e-48
TRINITY_DN15801_c0_g3	NP_001238260.1	uncharacterized protein LOC100305632 [Glycine max]	Glycine_max	100	1.3e-32
TRINITY_DN15804_c0_g1	XP_017234344.1	PREDICTED: aquaporin NIP1-1-like [Daucus carota subsp. sativus]	Daucus_carota	77.2	8.9e-115
TRINITY_DN15819_c0_g1	XP_017256172.1	PREDICTED: putative nuclease HARBI1 [Daucus carota subsp. sativus]	Daucus_carota	86.8	7.6e-202
TRINITY_DN1581_c0_g1	GAQ91151.1	Hypothetical protein KFL_007350010 [Klebsormidium nitens]	Klebsormidium_nitens	40.4	2.6e-12
TRINITY_DN15821_c0_g1	XP_006604782.1	protein transport protein Sec24-like At3g07100 isoform X1 [Glycine max]	Glycine_max	100	2.1e-33
TRINITY_DN15826_c0_g1	XP_017220412.1	PREDICTED: la protein 1-like [Daucus carota subsp. sativus]	Daucus_carota	73.3	1.7e-101
TRINITY_DN15826_c0_g2	KZN10391.1	hypothetical protein DCAR_003047 [Daucus carota subsp. sativus]	Daucus_carota	86.8	1.9e-66
TRINITY_DN15829_c0_g2	XP_017230598.1	PREDICTED: pentatricopeptide repeat-containing protein At1g73710 isoform X1 [Daucus carota subsp. sativus]	Daucus_carota	63	2.8e-25
TRINITY_DN15838_c0_g2	XP_017231516.1	PREDICTED: protein LSD1 [Daucus carota subsp. sativus]	Daucus_carota	78	5.3e-21
TRINITY_DN15839_c0_g1	XP_017240261.1	PREDICTED: uncharacterized protein LOC108213041 [Daucus carota subsp. sativus]	Daucus_carota	77.7	3e-107
TRINITY_DN15842_c0_g1	KZM90109.1	hypothetical protein DCAR_022526 [Daucus carota subsp. sativus]	Daucus_carota	70.3	1.5e-78
TRINITY_DN15843_c0_g1	XP_017255376.1	PREDICTED: uncharacterized protein C683.02c [Daucus carota subsp. sativus]	Daucus_carota	74.4	2e-48
TRINITY_DN15847_c0_g2	XP_017242416.1	PREDICTED: mediator-associated protein 1 [Daucus carota subsp. sativus]	Daucus_carota	52.5	6.8e-66
TRINITY_DN15857_c1_g1	NP_001235143.1	uncharacterized protein LOC100527116 precursor [Glycine max]	Glycine_max	97.6	1.4e-25
TRINITY_DN15864_c0_g1	PON68688.1	Disease resistance response protein [Parasponia andersonii]	Parasponia_andersonii	42	1.2e-28
TRINITY_DN15867_c0_g1	NP_001238585.2	uncharacterized protein LOC100306421 [Glycine max]	Glycine_max	100	1.3e-46
TRINITY_DN15869_c0_g1	XP_017215200.1	PREDICTED: protein EDS1-like [Daucus carota subsp. sativus]	Daucus_carota	75.1	1.4e-256
TRINITY_DN15874_c0_g1	XP_015645186.1	uncharacterized protein LOC4343053 [Oryza sativa Japonica Group]	Oryza_sativa	98.7	4.6e-28
TRINITY_DN15878_c0_g2	XP_023769927.1	aquaporin SIP1-1-like [Lactuca sativa]	Lactuca_sativa	74.4	4.4e-09
TRINITY_DN15879_c0_g1	XP_017235814.1	PREDICTED: stellacyanin [Daucus carota subsp. sativus]	Daucus_carota	89.2	4.2e-34
TRINITY_DN15879_c0_g2	XP_017235814.1	PREDICTED: stellacyanin [Daucus carota subsp. sativus]	Daucus_carota	79.7	1.9e-26
TRINITY_DN15880_c0_g1	XP_017244185.1	PREDICTED: DNA-directed RNA polymerases I and III subunit RPAC1 [Daucus carota subsp. sativus]	Daucus_carota	86.4	2.8e-184
TRINITY_DN15883_c0_g1	XP_017252127.1	PREDICTED: uncharacterized protein LOC108222741 [Daucus carota subsp. sativus]	Daucus_carota	81.4	1.1e-24
TRINITY_DN15892_c0_g1	XP_023875501.1	GTP-binding protein rhoA [Quercus suber]	Quercus_suber	75.5	8.6e-61
TRINITY_DN15895_c0_g1	KRH18281.1	hypothetical protein GLYMA_13G048800 [Glycine max]	Glycine_max	100	8.6e-97
TRINITY_DN15897_c0_g1	ACN31553.1	unknown [Zea mays]	Zea_mays	50	2.9e-48
TRINITY_DN15899_c0_g1	XP_017242531.1	PREDICTED: tRNA-dihydrouridine(16/17) synthase [NAD(P)(+)]-like [Daucus carota subsp. sativus]	Daucus_carota	86.6	5.3e-189
TRINITY_DN15902_c0_g1	KZN04926.1	hypothetical protein DCAR_005763 [Daucus carota subsp. sativus]	Daucus_carota	69.3	5.5e-17
TRINITY_DN15904_c0_g1	XP_017258663.1	PREDICTED: uncharacterized TPR repeat-containing protein At1g05150-like [Daucus carota subsp. sativus]	Daucus_carota	90.2	0
TRINITY_DN15907_c0_g1	XP_017217654.1	PREDICTED: ethylene-responsive transcription factor ERF003-like [Daucus carota subsp. sativus]	Daucus_carota	73.7	8e-60
TRINITY_DN15912_c0_g1	KZM98607.1	hypothetical protein DCAR_014031 [Daucus carota subsp. sativus]	Daucus_carota	63.6	7.4e-32
TRINITY_DN15913_c0_g1	XP_017250213.1	PREDICTED: uncharacterized protein DDB_G0275933 [Daucus carota subsp. sativus]	Daucus_carota	96.8	1.4e-43
TRINITY_DN15914_c0_g1	XP_003548057.1	T-complex protein 1 subunit theta [Glycine max]	Glycine_max	98.6	3.7e-27
TRINITY_DN15915_c0_g1	XP_017227412.1	PREDICTED: root phototropism protein 3-like [Daucus carota subsp. sativus]	Daucus_carota	88.7	0
TRINITY_DN15916_c0_g1	XP_017248457.1	PREDICTED: 50S ribosomal protein L9, chloroplastic [Daucus carota subsp. sativus]	Daucus_carota	87.2	8.8e-86
TRINITY_DN15917_c0_g1	XP_017258870.1	PREDICTED: uncharacterized protein LOC108227967 [Daucus carota subsp. sativus]	Daucus_carota	77.9	2.6e-38
TRINITY_DN15921_c0_g1	KZN06120.1	hypothetical protein DCAR_006957 [Daucus carota subsp. sativus]	Daucus_carota	88.4	6.1e-46
TRINITY_DN15924_c0_g1	KZM98640.1	hypothetical protein DCAR_013998 [Daucus carota subsp. sativus]	Daucus_carota	78.8	4.1e-39
TRINITY_DN15929_c0_g1	XP_006578150.1	probable sugar phosphate/phosphate translocator At5g25400 [Glycine max]	Glycine_max	100	1.2e-69
TRINITY_DN15930_c0_g1	RZC06620.1	Aspartyl protease AED3 [Glycine soja]	Glycine_soja	100	5.9e-39
TRINITY_DN15930_c0_g2	XP_003522749.1	aspartyl protease AED3 [Glycine max]	Glycine_max	100	5.1e-38
TRINITY_DN15932_c0_g1	XP_003531029.1	protein EXORDIUM-like 2 [Glycine max]	Glycine_max	100	1.4e-34
TRINITY_DN15935_c1_g3	XP_017218443.1	PREDICTED: uncharacterized protein LOC108195901 [Daucus carota subsp. sativus]	Daucus_carota	82.9	3e-141
TRINITY_DN15938_c0_g1	BAD87150.1	zinc finger protein 216-like [Oryza sativa Japonica Group]	Oryza_sativa	63.6	9.2e-06
TRINITY_DN15942_c0_g1	AUZ98420.1	heterodimeric geranylgeranyl pyrophosphate synthase small subunit [Trachyspermum ammi]	Trachyspermum_ammi	85.8	2.9e-161
TRINITY_DN15944_c0_g1	XP_017217648.1	PREDICTED: uncharacterized protein LOC108195205 [Daucus carota subsp. sativus]	Daucus_carota	82	4.7e-44
TRINITY_DN15955_c0_g3	XP_017231426.1	PREDICTED: uncharacterized protein LOC108205846 [Daucus carota subsp. sativus]	Daucus_carota	87.5	6.6e-41
TRINITY_DN15958_c0_g1	OVA02320.1	hypothetical protein BVC80_9099g120 [Macleaya cordata]	Macleaya_cordata	76.1	3e-30
TRINITY_DN15959_c0_g2	XP_023915239.1	myosin type-2 heavy chain 1-like [Quercus suber]	Quercus_suber	48.6	3.1e-10
TRINITY_DN15960_c0_g1	XP_017240231.1	PREDICTED: titin-like [Daucus carota subsp. sativus]	Daucus_carota	36.1	5.4e-18
TRINITY_DN15966_c0_g1	XP_017232613.1	PREDICTED: thioredoxin-like protein Clot [Daucus carota subsp. sativus]	Daucus_carota	88.6	6.6e-63
TRINITY_DN15969_c0_g1	XP_015645890.1	13 kDa prolamin C [Oryza sativa Japonica Group]	Oryza_sativa	99.4	2.3e-82
TRINITY_DN15970_c0_g1	XP_017221598.1	PREDICTED: abscisic acid receptor PYL9-like [Daucus carota subsp. sativus]	Daucus_carota	90.8	8.7e-78
TRINITY_DN15974_c0_g3	ACF79317.1	unknown [Zea mays]	Zea_mays	46.1	1.9e-08
TRINITY_DN15983_c0_g1	CAD91335.1	monosaccharide transporter [Glycine max]	Glycine_max	100	3.6e-19
TRINITY_DN15987_c0_g1	CDY58316.1	BnaA02g16460D [Brassica napus]	Brassica_napus	49	1e-16
TRINITY_DN15992_c0_g1	PNW71442.1	hypothetical protein CHLRE_16g654500v5 [Chlamydomonas reinhardtii]	Chlamydomonas_reinhardtii	43.4	3.5e-30
TRINITY_DN15997_c0_g1	KZN09229.1	hypothetical protein DCAR_001885 [Daucus carota subsp. sativus]	Daucus_carota	78.2	1.3e-28
TRINITY_DN1599_c0_g1	KZM93634.1	hypothetical protein DCAR_016879 [Daucus carota subsp. sativus]	Daucus_carota	87.5	1.5e-28
TRINITY_DN15_c0_g1	EAZ08792.1	hypothetical protein OsI_31052 [Oryza sativa Indica Group]	Oryza_sativa	100	7.8e-26
TRINITY_DN16004_c0_g1	KHG30387.1	U-box domain-containing 4 -like protein [Gossypium arboreum]	Gossypium_arboreum	82.2	3.7e-30
TRINITY_DN16006_c0_g2	XP_017244868.1	PREDICTED: putative pentatricopeptide repeat-containing protein At1g10330 isoform X1 [Daucus carota subsp. sativus]	Daucus_carota	70.8	2e-32
TRINITY_DN16006_c0_g3	KZM99700.1	hypothetical protein DCAR_012938 [Daucus carota subsp. sativus]	Daucus_carota	75	1.1e-27
TRINITY_DN16012_c0_g1	XP_023919386.1	glycogen phosphorylase-like, partial [Quercus suber]	Quercus_suber	80.3	8.1e-24
TRINITY_DN16012_c0_g2	XP_023880804.1	glycogen phosphorylase-like [Quercus suber]	Quercus_suber	48.4	5.9e-11
TRINITY_DN16017_c0_g1	XP_023905077.1	probable cytochrome b5 [Quercus suber]	Quercus_suber	59.5	4.2e-18
TRINITY_DN16020_c1_g1	YP_717300.1	nad5 (mitochondrion) [Ostreococcus tauri]	Ostreococcus_tauri	33.6	3.7e-74
TRINITY_DN16022_c0_g1	XP_017229533.1	PREDICTED: peroxidase 17 [Daucus carota subsp. sativus]	Daucus_carota	94.6	1.6e-111
TRINITY_DN16023_c0_g1	XP_017232666.1	PREDICTED: DNA-directed RNA polymerases I and III subunit RPAC2-like [Daucus carota subsp. sativus]	Daucus_carota	80.8	2.4e-42
TRINITY_DN16024_c0_g2	XP_017259024.1	PREDICTED: F-box/LRR-repeat MAX2 homolog A [Daucus carota subsp. sativus]	Daucus_carota	79	1.3e-89
TRINITY_DN16024_c0_g3	XP_017259024.1	PREDICTED: F-box/LRR-repeat MAX2 homolog A [Daucus carota subsp. sativus]	Daucus_carota	80.9	4.4e-250
TRINITY_DN16026_c0_g1	PQM34053.1	putative boron transporter 2 [Prunus yedoensis var. nudiflora]	Prunus_yedoensis	65	3.5e-14
TRINITY_DN16032_c0_g1	XP_017240621.1	PREDICTED: 15.4 kDa class V heat shock protein [Daucus carota subsp. sativus]	Daucus_carota	85.4	9.7e-62
TRINITY_DN16036_c0_g1	RZB54956.1	60S ribosomal protein L29-1 [Glycine soja]	Glycine_soja	98.6	4.7e-32
TRINITY_DN16038_c0_g1	XP_006592435.1	putative uncharacterized protein DDB_G0271606 isoform X1 [Glycine max]	Glycine_max	100	3.6e-19
TRINITY_DN16042_c0_g1	XP_017240724.1	PREDICTED: uncharacterized protein LOC108213442 [Daucus carota subsp. sativus]	Daucus_carota	84.5	4.6e-22
TRINITY_DN16042_c0_g2	XP_027184891.1	uncharacterized protein LOC113783064 [Coffea eugenioides]	Coffea_eugenioides	57.7	4.2e-36
TRINITY_DN16047_c0_g1	XP_017256585.1	PREDICTED: 2-hydroxyisoflavanone dehydratase-like [Daucus carota subsp. sativus]	Daucus_carota	82.4	8.8e-24
TRINITY_DN16047_c0_g2	XP_017256585.1	PREDICTED: 2-hydroxyisoflavanone dehydratase-like [Daucus carota subsp. sativus]	Daucus_carota	79.4	6.1e-121
TRINITY_DN16050_c0_g1	BAK02182.1	predicted protein [Hordeum vulgare subsp. vulgare]	Hordeum_vulgare	82.1	4.2e-46
TRINITY_DN16050_c0_g2	BAK02182.1	predicted protein [Hordeum vulgare subsp. vulgare]	Hordeum_vulgare	80.6	5.3e-40
TRINITY_DN16052_c0_g1	XP_017240830.1	PREDICTED: NAC domain-containing protein 104-like [Daucus carota subsp. sativus]	Daucus_carota	46.2	7.7e-34
TRINITY_DN16060_c0_g2	KZM88495.1	hypothetical protein DCAR_025570 [Daucus carota subsp. sativus]	Daucus_carota	71.2	8.4e-17
TRINITY_DN16061_c0_g2	XP_017220659.1	PREDICTED: uncharacterized protein LOC108197524 [Daucus carota subsp. sativus]	Daucus_carota	79.1	1.4e-28
TRINITY_DN16065_c0_g3	KZN02992.1	hypothetical protein DCAR_011748 [Daucus carota subsp. sativus]	Daucus_carota	91	3.6e-24
TRINITY_DN16067_c0_g2	ACU23146.1	unknown [Glycine max]	Glycine_max	100	8.7e-22
TRINITY_DN16069_c0_g1	XP_017234452.1	PREDICTED: uncharacterized protein LOC108208432 [Daucus carota subsp. sativus]	Daucus_carota	74	7.1e-85
TRINITY_DN16072_c0_g1	ASL24776.1	mitochondrial ATP synthase subunit 9 [Allium cepa]	Allium_cepa	100	7.2e-31
TRINITY_DN16075_c0_g2	XP_017236499.1	PREDICTED: uncharacterized protein LOC108209854 [Daucus carota subsp. sativus]	Daucus_carota	64.6	1e-59
TRINITY_DN16076_c0_g2	XP_017254742.1	PREDICTED: pentatricopeptide repeat-containing protein At2g42920, chloroplastic [Daucus carota subsp. sativus]	Daucus_carota	76.6	4.9e-81
TRINITY_DN16078_c0_g1	XP_015610903.1	shaggy-related protein kinase alpha [Oryza sativa Japonica Group]	Oryza_sativa	100	1.6e-11
TRINITY_DN16078_c0_g2	AAX96827.1	hypothetical protein LOC_Os11g20310 [Oryza sativa Japonica Group]	Oryza_sativa	97.3	8e-12
TRINITY_DN16085_c0_g1	XP_017255663.1	PREDICTED: dirigent protein 22-like [Daucus carota subsp. sativus]	Daucus_carota	78.3	5.5e-76
TRINITY_DN16086_c0_g1	XP_017244987.1	PREDICTED: uncharacterized protein LOC108216671 [Daucus carota subsp. sativus]	Daucus_carota	91.4	2.2e-10
TRINITY_DN16086_c0_g2	XP_017244987.1	PREDICTED: uncharacterized protein LOC108216671 [Daucus carota subsp. sativus]	Daucus_carota	68.1	1.2e-53
TRINITY_DN16086_c0_g3	XP_016748798.1	PREDICTED: myotubularin-related protein DDB_G0290005-like [Gossypium hirsutum]	Gossypium_hirsutum	66.7	8.7e-14
TRINITY_DN16090_c0_g1	XP_017244201.1	PREDICTED: DNA-directed RNA polymerases I and III subunit RPAC2 [Daucus carota subsp. sativus]	Daucus_carota	80	1.3e-42
TRINITY_DN16092_c0_g1	KZN06488.1	hypothetical protein DCAR_007325 [Daucus carota subsp. sativus]	Daucus_carota	79.7	6.9e-75
TRINITY_DN16094_c0_g1	XP_024374687.1	60S ribosomal protein L30 [Physcomitrella patens]	Physcomitrella_patens	78.6	2.1e-44
TRINITY_DN16096_c0_g1	XP_017249822.1	PREDICTED: dual specificity phosphatase Cdc25 [Daucus carota subsp. sativus]	Daucus_carota	88.3	1.3e-63
TRINITY_DN16109_c0_g1	XP_017250120.1	PREDICTED: putative caffeoyl-CoA O-methyltransferase At1g67980 [Daucus carota subsp. sativus]	Daucus_carota	75.4	2.3e-89
TRINITY_DN16110_c0_g1	NP_001241015.1	uncharacterized protein LOC100786832 [Glycine max]	Glycine_max	100	8.5e-45
TRINITY_DN16117_c1_g1	XP_018831990.1	PREDICTED: eukaryotic translation initiation factor 3 subunit B-like [Juglans regia]	Juglans_regia	60	9.3e-17
TRINITY_DN16121_c0_g1	XP_017255142.1	PREDICTED: uncharacterized protein LOC108224894 isoform X1 [Daucus carota subsp. sativus]	Daucus_carota	77.7	1.8e-150
TRINITY_DN16122_c0_g1	RZB82272.1	Ubiquitin-like protein 5 [Glycine soja]	Glycine_soja	98.7	1.8e-37
TRINITY_DN16125_c0_g1	XP_017253551.1	PREDICTED: protein jagunal homolog 1-like [Daucus carota subsp. sativus]	Daucus_carota	77.9	2.8e-63
TRINITY_DN16126_c0_g1	ACU18529.1	unknown [Glycine max]	Glycine_max	100	5.6e-30
TRINITY_DN16127_c0_g1	OAE27478.1	hypothetical protein AXG93_3911s1610 [Marchantia polymorpha subsp. ruderalis]	Marchantia_polymorpha	49.2	1.9e-07
TRINITY_DN16129_c0_g1	RZC02885.1	Receptor-like protein EIX2 [Glycine soja]	Glycine_soja	100	3.7e-24
TRINITY_DN16140_c0_g1	XP_003538137.1	uncharacterized protein LOC100305574 [Glycine max]	Glycine_max	100	5.5e-31
TRINITY_DN16142_c0_g1	ACU19269.1	unknown [Glycine max]	Glycine_max	100	1.3e-48
TRINITY_DN16147_c0_g1	KRH29412.1	hypothetical protein GLYMA_11G114600 [Glycine max]	Glycine_max	75.6	4.9e-18
TRINITY_DN16149_c0_g1	KZN06065.1	hypothetical protein DCAR_006902 [Daucus carota subsp. sativus]	Daucus_carota	82.7	3e-43
TRINITY_DN16154_c0_g1	XP_017249759.1	PREDICTED: probable 3-beta-hydroxysteroid-Delta(8),Delta(7)-isomerase [Daucus carota subsp. sativus]	Daucus_carota	86	1.7e-109
TRINITY_DN16158_c0_g1	XP_017254361.1	PREDICTED: uncharacterized protein LOC108224317 [Daucus carota subsp. sativus]	Daucus_carota	58.9	8.5e-116
TRINITY_DN16164_c0_g1	NP_001105056.1	prolamin 19 kDa alpha zein z1D_2 precursor [Zea mays]	Zea_mays	100	3.2e-46
TRINITY_DN16165_c0_g1	P0C8M8.1	RecName: Full=Probable serine/threonine-protein kinase CCRP1; AltName: Full=Cell-cycle related Protein 1	Zea_mays	49	2.8e-06
TRINITY_DN1616_c0_g1	BAF29092.2	Os12g0131000 [Oryza sativa Japonica Group]	Oryza_sativa	100	3.1e-34
TRINITY_DN16170_c0_g1	XP_017217112.1	PREDICTED: uncharacterized protein LOC108194669 [Daucus carota subsp. sativus]	Daucus_carota	88.6	7.8e-34
TRINITY_DN16170_c2_g1	XP_017233414.1	PREDICTED: uncharacterized protein LOC108207482 [Daucus carota subsp. sativus]	Daucus_carota	80.9	2.1e-24
TRINITY_DN16173_c0_g1	EAY84905.1	hypothetical protein OsI_06273 [Oryza sativa Indica Group]	Oryza_sativa	100	1.6e-44
TRINITY_DN16176_c0_g1	XP_017258060.1	PREDICTED: uncharacterized protein LOC108227436 [Daucus carota subsp. sativus]	Daucus_carota	73.7	4.7e-115
TRINITY_DN16176_c0_g2	XP_017258060.1	PREDICTED: uncharacterized protein LOC108227436 [Daucus carota subsp. sativus]	Daucus_carota	60.6	7.8e-48
TRINITY_DN16177_c0_g1	XP_017220484.1	PREDICTED: uncharacterized protein LOC108197387 [Daucus carota subsp. sativus]	Daucus_carota	78.5	9.1e-101
TRINITY_DN16179_c0_g1	XP_023892253.1	cell division control protein 3-like [Quercus suber]	Quercus_suber	58.4	5.1e-23
TRINITY_DN16179_c0_g2	XP_009351222.1	PREDICTED: cell division control protein 3-like [Pyrus x bretschneideri]	Pyrus_x_bretschneideri	48.3	5.6e-10
TRINITY_DN16180_c0_g1	XP_017250205.1	PREDICTED: codeine O-demethylase-like [Daucus carota subsp. sativus]	Daucus_carota	80.8	2.5e-161
TRINITY_DN16182_c0_g2	XP_017237509.1	PREDICTED: very-long-chain enoyl-CoA reductase [Daucus carota subsp. sativus]	Daucus_carota	93.5	7.8e-160
TRINITY_DN16185_c0_g2	KHN37836.1	Copper transport protein ATOX1 [Glycine soja]	Glycine_soja	100	1.4e-32
TRINITY_DN16186_c0_g1	XP_017241761.1	PREDICTED: cytochrome b6-f complex iron-sulfur subunit, chloroplastic [Daucus carota subsp. sativus]	Daucus_carota	86.5	1.2e-100
TRINITY_DN16189_c0_g1	AHF45909.1	CYP716Y1 [Bupleurum falcatum]	Bupleurum_falcatum	71.8	1.5e-213
TRINITY_DN16198_c0_g3	EAZ06455.1	hypothetical protein OsI_28693 [Oryza sativa Indica Group]	Oryza_sativa	100	4.3e-36
TRINITY_DN16199_c0_g1	RZC04728.1	5'-adenylylsulfate reductase 3, chloroplastic isoform C [Glycine soja]	Glycine_soja	99.2	1.7e-64
TRINITY_DN16202_c0_g1	XP_017256697.1	PREDICTED: E3 ubiquitin-protein ligase PUB24-like [Daucus carota subsp. sativus]	Daucus_carota	69.5	1.2e-150
TRINITY_DN16205_c0_g1	RZC27370.1	Glycerophosphodiester phosphodiesterase GDPDL1 isoform B [Glycine soja]	Glycine_soja	95.1	4.2e-35
TRINITY_DN16207_c0_g1	XP_017251515.1	PREDICTED: putative clathrin assembly protein At1g25240 [Daucus carota subsp. sativus]	Daucus_carota	68.4	1e-148
TRINITY_DN16208_c1_g1	ACU18225.1	unknown [Glycine max]	Glycine_max	100	3.5e-36
TRINITY_DN16209_c0_g1	KXZ45670.1	hypothetical protein GPECTOR_52g68 [Gonium pectorale]	Gonium_pectorale	77.8	6.2e-74
TRINITY_DN16209_c0_g2	PRW56328.1	cyclophilin [Chlorella sorokiniana]	Chlorella_sorokiniana	75.6	7.5e-10
TRINITY_DN16209_c0_g3	KXZ45670.1	hypothetical protein GPECTOR_52g68 [Gonium pectorale]	Gonium_pectorale	76	3.7e-72
TRINITY_DN16211_c0_g1	XP_015637381.1	60S ribosomal protein L35a-2 [Oryza sativa Japonica Group]	Oryza_sativa	100	1.6e-57
TRINITY_DN16215_c0_g1	XP_006579883.1	probable disease resistance protein At5g66900 [Glycine max]	Glycine_max	100	2.6e-127
TRINITY_DN16216_c0_g1	XP_015636847.1	60S ribosomal protein L14-1 [Oryza sativa Japonica Group]	Oryza_sativa	100	3.6e-67
TRINITY_DN16216_c0_g2	NP_001237476.1	uncharacterized protein LOC100499889 [Glycine max]	Glycine_max	100	6.1e-48
TRINITY_DN16217_c0_g1	XP_017235550.1	PREDICTED: lon protease homolog 2, peroxisomal-like [Daucus carota subsp. sativus]	Daucus_carota	93.1	4.9e-53
TRINITY_DN16217_c0_g4	XP_010274558.1	PREDICTED: lon protease homolog 2, peroxisomal [Nelumbo nucifera]	Nelumbo_nucifera	82.5	1.3e-10
TRINITY_DN16222_c0_g1	VDC99619.1	unnamed protein product [Brassica rapa]	Brassica_rapa	74.3	1e-21
TRINITY_DN16223_c0_g1	GAV84608.1	hypothetical protein CFOL_v3_28052 [Cephalotus follicularis]	Cephalotus_follicularis	74.4	1.6e-37
TRINITY_DN16224_c0_g1	BAH93520.1	Os06g0479233 [Oryza sativa Japonica Group]	Oryza_sativa	86.6	3.5e-12
TRINITY_DN16225_c0_g1	XP_005649206.1	ribosomal protein 60S [Coccomyxa subellipsoidea C-169]	Coccomyxa_subellipsoidea	61.9	2.7e-15
TRINITY_DN16227_c0_g1	XP_017251317.1	PREDICTED: F-box/LRR-repeat protein 2 [Daucus carota subsp. sativus]	Daucus_carota	62.4	2.7e-139
TRINITY_DN16229_c0_g1	XP_017238318.1	PREDICTED: poly [ADP-ribose] polymerase 2 [Daucus carota subsp. sativus]	Daucus_carota	74	6.8e-289
TRINITY_DN16232_c0_g1	PSS10452.1	Pre-mRNA-splicing factor like [Actinidia chinensis var. chinensis]	Actinidia_chinensis	57.5	2.7e-93
TRINITY_DN16235_c0_g1	KZM82622.1	hypothetical protein DCAR_030191 [Daucus carota subsp. sativus]	Daucus_carota	69.6	2.1e-139
TRINITY_DN16236_c0_g2	GAQ83768.1	cytochrome p450 [Klebsormidium nitens]	Klebsormidium_nitens	36.4	2.4e-10
TRINITY_DN16237_c0_g1	KZN06769.1	hypothetical protein DCAR_007606 [Daucus carota subsp. sativus]	Daucus_carota	72.5	3e-23
TRINITY_DN16239_c0_g1	XP_017241060.1	PREDICTED: uncharacterized protein LOC108213782 [Daucus carota subsp. sativus]	Daucus_carota	67.5	6e-49
TRINITY_DN1623_c0_g2	XP_017227369.1	PREDICTED: uncharacterized protein LOC108203127 [Daucus carota subsp. sativus]	Daucus_carota	56.1	4.8e-13
TRINITY_DN16247_c0_g2	XP_003536212.1	basic 7S globulin [Glycine max]	Glycine_max	100	8.3e-214
TRINITY_DN16251_c0_g1	XP_004986000.1	T-complex protein 1 subunit delta [Setaria italica]	Setaria_italica	74.7	2.7e-25
TRINITY_DN16251_c0_g2	XP_002501830.1	predicted protein [Micromonas commoda]	Micromonas_commoda	60.2	4e-25
TRINITY_DN16252_c0_g1	XP_017216374.1	PREDICTED: uncharacterized protein LOC108194005 [Daucus carota subsp. sativus]	Daucus_carota	58.9	3.6e-56
TRINITY_DN16254_c0_g2	XP_008364609.1	PREDICTED: 50S ribosomal protein L7/L12-like [Malus domestica]	Malus_domestica	77.7	4.4e-79
TRINITY_DN16258_c0_g4	XP_020223585.1	proton pump-interactor 1-like [Cajanus cajan]	Cajanus_cajan	92.2	7.4e-17
TRINITY_DN16259_c0_g2	XP_017229643.1	PREDICTED: 50S ribosomal protein L28, chloroplastic [Daucus carota subsp. sativus]	Daucus_carota	74.7	1.3e-52
TRINITY_DN16260_c0_g1	ACS93764.1	sterol 24-C methyltransferase 2-2 [Glycine max]	Glycine_max	100	2.5e-41
TRINITY_DN16260_c0_g2	ACS93764.1	sterol 24-C methyltransferase 2-2 [Glycine max]	Glycine_max	99	2.5e-53
TRINITY_DN16265_c0_g1	XP_017257729.1	PREDICTED: serine/threonine-protein kinase minibrain [Daucus carota subsp. sativus]	Daucus_carota	81.6	3.1e-62
TRINITY_DN16271_c0_g1	XP_017249279.1	PREDICTED: uncharacterized protein LOC108220114 [Daucus carota subsp. sativus]	Daucus_carota	62.6	6e-49
TRINITY_DN16277_c0_g1	XP_017222430.1	PREDICTED: inhibitor of trypsin and hageman factor [Daucus carota subsp. sativus]	Daucus_carota	68.9	1.5e-08
TRINITY_DN16282_c0_g2	KZN10106.1	hypothetical protein DCAR_002762 [Daucus carota subsp. sativus]	Daucus_carota	73.5	1.5e-62
TRINITY_DN16283_c1_g4	XP_027184536.1	aspartic proteinase-like [Coffea eugenioides]	Coffea_eugenioides	38.1	2e-07
TRINITY_DN16285_c0_g1	XP_017237906.1	PREDICTED: peptidyl-prolyl cis-trans isomerase FKBP20-1 [Daucus carota subsp. sativus]	Daucus_carota	90.5	1.5e-71
TRINITY_DN16286_c0_g1	KZM93644.1	hypothetical protein DCAR_016889 [Daucus carota subsp. sativus]	Daucus_carota	63.8	8.5e-34
TRINITY_DN16287_c0_g5	XP_017231426.1	PREDICTED: uncharacterized protein LOC108205846 [Daucus carota subsp. sativus]	Daucus_carota	82	1.1e-22
TRINITY_DN16288_c0_g6	XP_017233947.1	PREDICTED: pentatricopeptide repeat-containing protein At1g31920 [Daucus carota subsp. sativus]	Daucus_carota	70.6	4.2e-13
TRINITY_DN16291_c0_g1	EPS72800.1	hypothetical protein M569_01958 [Genlisea aurea]	Genlisea_aurea	72.3	1.1e-47
TRINITY_DN16293_c0_g2	GAV56958.1	KH_1 domain-containing protein [Cephalotus follicularis]	Cephalotus_follicularis	66.3	5.7e-18
TRINITY_DN16294_c0_g2	ABK96400.1	unknown [Populus trichocarpa x Populus deltoides]	Populus_trichocarpa_x_Populus_deltoides	79.5	2.6e-37
TRINITY_DN16294_c0_g3	GAX77984.1	hypothetical protein CEUSTIGMA_g5426.t1 [Chlamydomonas eustigma]	Chlamydomonas_eustigma	76.2	3.9e-31
TRINITY_DN16302_c0_g1	XP_017227080.1	PREDICTED: uncharacterized protein LOC108202951 isoform X2 [Daucus carota subsp. sativus]	Daucus_carota	75.7	1.9e-20
TRINITY_DN16304_c0_g2	XP_017247735.1	PREDICTED: keratin, type II cytoskeletal 5 [Daucus carota subsp. sativus]	Daucus_carota	83.5	1.8e-23
TRINITY_DN16314_c0_g1	XP_017216264.1	PREDICTED: uncharacterized protein LOC108193922 isoform X1 [Daucus carota subsp. sativus]	Daucus_carota	89.4	1.3e-71
TRINITY_DN16318_c0_g2	XP_017224333.1	PREDICTED: uncharacterized protein YwkD [Daucus carota subsp. sativus]	Daucus_carota	84.4	1.6e-60
TRINITY_DN16321_c0_g1	XP_017220492.1	PREDICTED: uncharacterized protein LOC108197395 [Daucus carota subsp. sativus]	Daucus_carota	90.5	6.5e-99
TRINITY_DN16325_c0_g1	XP_002948706.1	hypothetical protein VOLCADRAFT_109683 [Volvox carteri f. nagariensis]	Volvox_carteri	81.2	6.9e-33
TRINITY_DN16326_c0_g1	NP_001237824.1	uncharacterized protein LOC100500678 [Glycine max]	Glycine_max	100	2.6e-30
TRINITY_DN16334_c0_g1	PIN05617.1	Ca2+/calmodulin-dependent protein kinase, EF-Hand protein superfamily [Handroanthus impetiginosus]	Handroanthus_impetiginosus	42.3	5.9e-10
TRINITY_DN16339_c1_g1	KRH24256.1	hypothetical protein GLYMA_12G030800 [Glycine max]	Glycine_max	100	7.9e-41
TRINITY_DN16344_c0_g4	GAX79827.1	hypothetical protein CEUSTIGMA_g7267.t1 [Chlamydomonas eustigma]	Chlamydomonas_eustigma	64.6	6.4e-16
TRINITY_DN16347_c0_g2	ACU23735.1	unknown [Glycine max]	Glycine_max	98.9	2.1e-51
TRINITY_DN16349_c0_g1	XP_017237999.1	PREDICTED: auxin-binding protein T85 [Daucus carota subsp. sativus]	Daucus_carota	78.4	2.5e-87
TRINITY_DN16350_c0_g1	XP_017238441.1	PREDICTED: uncharacterized protein LOC108211369 [Daucus carota subsp. sativus]	Daucus_carota	83.6	2.2e-47
TRINITY_DN16358_c0_g1	XP_017238899.1	PREDICTED: acidic endochitinase-like [Daucus carota subsp. sativus]	Daucus_carota	79.8	3.8e-130
TRINITY_DN16362_c0_g1	EAY86110.1	hypothetical protein OsI_07480 [Oryza sativa Indica Group]	Oryza_sativa	100	1.7e-206
TRINITY_DN1636_c0_g1	NP_001304386.1	allene oxide cyclase 4, chloroplastic-like [Glycine max]	Glycine_max	100	4.4e-14
TRINITY_DN16375_c0_g1	BAK05588.1	predicted protein [Hordeum vulgare subsp. vulgare]	Hordeum_vulgare	46.2	1.7e-13
TRINITY_DN16375_c0_g2	BAK05588.1	predicted protein [Hordeum vulgare subsp. vulgare]	Hordeum_vulgare	75.6	5.5e-47
TRINITY_DN16375_c0_g3	BAK06597.1	predicted protein, partial [Hordeum vulgare subsp. vulgare]	Hordeum_vulgare	75.4	4.6e-68
TRINITY_DN16382_c0_g1	XP_017252344.1	PREDICTED: xylose isomerase [Daucus carota subsp. sativus]	Daucus_carota	90.4	1.5e-146
TRINITY_DN16385_c0_g1	RXI03904.1	hypothetical protein DVH24_038178 [Malus domestica]	Malus_domestica	69.7	1.4e-78
TRINITY_DN16386_c0_g1	XP_017235997.1	PREDICTED: uncharacterized protein LOC108209548 [Daucus carota subsp. sativus]	Daucus_carota	75	1.1e-12
TRINITY_DN16387_c0_g1	XP_017235158.1	PREDICTED: uncharacterized RNA pseudouridine synthase aq_1464 [Daucus carota subsp. sativus]	Daucus_carota	86.5	6.7e-164
TRINITY_DN16392_c0_g2	XP_026392982.1	uridine kinase-like protein 4 isoform X1 [Papaver somniferum]	Papaver_somniferum	46.6	3e-18
TRINITY_DN16393_c0_g1	KZN08713.1	hypothetical protein DCAR_001369 [Daucus carota subsp. sativus]	Daucus_carota	93.2	1.5e-29
TRINITY_DN16394_c1_g1	XP_017246645.1	PREDICTED: chitinase 2-like [Daucus carota subsp. sativus]	Daucus_carota	92.1	5.1e-161
TRINITY_DN16395_c0_g1	XP_017248585.1	PREDICTED: gamma-tubulin complex component 2 [Daucus carota subsp. sativus]	Daucus_carota	86.4	2.2e-34
TRINITY_DN16396_c0_g3	KZM98596.1	hypothetical protein DCAR_014042 [Daucus carota subsp. sativus]	Daucus_carota	67.5	3.3e-42
TRINITY_DN16397_c0_g1	KZM92050.1	hypothetical protein DCAR_020585 [Daucus carota subsp. sativus]	Daucus_carota	55.8	1.1e-19
TRINITY_DN16398_c0_g1	XP_017238792.1	PREDICTED: BEL1-like homeodomain protein 3 [Daucus carota subsp. sativus]	Daucus_carota	73.5	4.4e-147
TRINITY_DN163_c0_g1	EAY89586.1	hypothetical protein OsI_11115 [Oryza sativa Indica Group]	Oryza_sativa	100	2e-16
TRINITY_DN16400_c0_g1	XP_027344602.1	reactive oxygen species modulator 1 [Abrus precatorius]	Abrus_precatorius	93.2	2.8e-21
TRINITY_DN16403_c0_g1	XP_017238691.1	PREDICTED: 50S ribosomal protein 5, chloroplastic [Daucus carota subsp. sativus]	Daucus_carota	84.7	1.4e-29
TRINITY_DN16404_c1_g2	XP_017221812.1	PREDICTED: high mobility group B protein 15-like [Daucus carota subsp. sativus]	Daucus_carota	63.9	9.5e-19
TRINITY_DN16405_c0_g1	KZM83276.1	hypothetical protein DCAR_030845 [Daucus carota subsp. sativus]	Daucus_carota	69.8	2.8e-28
TRINITY_DN16407_c0_g2	XP_019426024.1	PREDICTED: triosephosphate isomerase, chloroplastic-like [Lupinus angustifolius]	Lupinus_angustifolius	60.3	1.3e-41
TRINITY_DN16408_c0_g2	PIA35750.1	hypothetical protein AQUCO_03500242v1 [Aquilegia coerulea]	Aquilegia_coerulea	80.4	7.2e-59
TRINITY_DN16415_c0_g2	KZN10537.1	hypothetical protein DCAR_003193 [Daucus carota subsp. sativus]	Daucus_carota	59.5	7.2e-27
TRINITY_DN16416_c0_g1	XP_017256963.1	PREDICTED: uncharacterized protein LOC108226511 [Daucus carota subsp. sativus]	Daucus_carota	79	1.3e-87
TRINITY_DN16417_c0_g3	KHN45147.1	hypothetical protein glysoja_031375 [Glycine soja]	Glycine_soja	96	5.8e-17
TRINITY_DN16420_c0_g1	XP_017229811.1	PREDICTED: 5'-methylthioadenosine/S-adenosylhomocysteine nucleosidase 2-like [Daucus carota subsp. sativus]	Daucus_carota	87.7	4.6e-126
TRINITY_DN16421_c0_g1	KZN06202.1	hypothetical protein DCAR_007039 [Daucus carota subsp. sativus]	Daucus_carota	91.6	8.2e-234
TRINITY_DN16427_c0_g1	XP_017254158.1	PREDICTED: probable serine/threonine-protein kinase WNK4 [Daucus carota subsp. sativus]	Daucus_carota	70.8	3.6e-187
TRINITY_DN16432_c0_g1	XP_017226559.1	PREDICTED: protein NSP-INTERACTING KINASE 1-like [Daucus carota subsp. sativus]	Daucus_carota	82.8	1.5e-62
TRINITY_DN16436_c0_g1	XP_017246590.1	PREDICTED: lipid transfer-like protein VAS [Daucus carota subsp. sativus]	Daucus_carota	62	5.1e-40
TRINITY_DN16438_c0_g4	XP_015625227.1	peptidyl-prolyl cis-trans isomerase [Oryza sativa Japonica Group]	Oryza_sativa	100	4.2e-98
TRINITY_DN16439_c0_g1	XP_017251736.1	PREDICTED: uncharacterized protein LOC108222328 [Daucus carota subsp. sativus]	Daucus_carota	43.5	1.1e-12
TRINITY_DN16440_c0_g2	XP_005843938.1	hypothetical protein CHLNCDRAFT_27566, partial [Chlorella variabilis]	Chlorella_variabilis	69.5	7.8e-24
TRINITY_DN16440_c0_g3	GBF95873.1	40S ribosomal protein S25 [Raphidocelis subcapitata]	Raphidocelis_subcapitata	61.9	1.3e-23
TRINITY_DN16444_c0_g1	XP_017240501.1	PREDICTED: auxin-responsive protein SAUR72-like [Daucus carota subsp. sativus]	Daucus_carota	80	3.9e-49
TRINITY_DN16445_c0_g2	KZN00833.1	hypothetical protein DCAR_009587 [Daucus carota subsp. sativus]	Daucus_carota	82.2	7.6e-38
TRINITY_DN16445_c0_g3	XP_017221417.1	PREDICTED: uncharacterized mitochondrial protein AtMg00810-like, partial [Daucus carota subsp. sativus]	Daucus_carota	91.8	1.6e-40
TRINITY_DN16449_c0_g1	XP_017254351.1	PREDICTED: transmembrane and coiled-coil domain-containing protein 1 [Daucus carota subsp. sativus]	Daucus_carota	94.3	2.9e-94
TRINITY_DN16453_c0_g2	XP_017226918.1	PREDICTED: ninja-family protein AFP1 [Daucus carota subsp. sativus]	Daucus_carota	50.7	1e-84
TRINITY_DN16454_c0_g2	KZM89741.1	hypothetical protein DCAR_022896 [Daucus carota subsp. sativus]	Daucus_carota	53.4	2.6e-10
TRINITY_DN16455_c0_g1	XP_002508787.1	predicted protein [Micromonas commoda]	Micromonas_commoda	62.5	6.7e-14
TRINITY_DN16458_c0_g1	XP_017240262.1	PREDICTED: myb-like protein J [Daucus carota subsp. sativus]	Daucus_carota	74.4	1.2e-66
TRINITY_DN16458_c0_g2	XP_017230401.1	PREDICTED: dentin sialophosphoprotein-like [Daucus carota subsp. sativus]	Daucus_carota	74.2	4.5e-29
TRINITY_DN16460_c0_g1	XP_017230975.1	PREDICTED: DNA (cytosine-5)-methyltransferase DRM2-like isoform X1 [Daucus carota subsp. sativus]	Daucus_carota	73.6	6.5e-296
TRINITY_DN16461_c1_g1	XP_017228946.1	PREDICTED: uncharacterized protein LOC108204148 [Daucus carota subsp. sativus]	Daucus_carota	64.4	4.4e-38
TRINITY_DN16467_c1_g2	PSS15786.1	Arabinosyltransferase ARAD1 [Actinidia chinensis var. chinensis]	Actinidia_chinensis	85.6	1.4e-88
TRINITY_DN16467_c1_g5	XP_017243977.1	PREDICTED: xylulose 5-phosphate/phosphate translocator, chloroplastic [Daucus carota subsp. sativus]	Daucus_carota	86.8	5.4e-53
TRINITY_DN16468_c0_g1	XP_019196635.1	PREDICTED: pumilio homolog 5-like isoform X1 [Ipomoea nil]	Ipomoea_nil	48.8	6.2e-15
TRINITY_DN16471_c0_g1	XP_010318982.1	pantothenate kinase 2 isoform X2 [Solanum lycopersicum]	Solanum_lycopersicum	87.2	2.4e-15
TRINITY_DN16477_c0_g2	NP_001242389.1	uncharacterized protein LOC100813186 [Glycine max]	Glycine_max	100	5.9e-42
TRINITY_DN16478_c0_g1	XP_020240749.1	60S ribosomal protein L12 [Asparagus officinalis]	Asparagus_officinalis	72.3	2.8e-64
TRINITY_DN16478_c0_g2	XP_023887678.1	60S ribosomal protein L12 [Quercus suber]	Quercus_suber	71.2	1.7e-63
TRINITY_DN16479_c0_g1	XP_017230117.1	PREDICTED: mitochondrial fission 1 protein A-like [Daucus carota subsp. sativus]	Daucus_carota	90	6.8e-58
TRINITY_DN16486_c0_g1	GBG70495.1	hypothetical protein CBR_g6624 [Chara braunii]	Chara_braunii	64.1	3.8e-26
TRINITY_DN1648_c0_g1	EEC84221.1	hypothetical protein OsI_30636 [Oryza sativa Indica Group]	Oryza_sativa	100	2.8e-28
TRINITY_DN16493_c0_g1	XP_017244145.1	PREDICTED: casein kinase II subunit beta-like [Daucus carota subsp. sativus]	Daucus_carota	89.4	1.8e-91
TRINITY_DN16494_c0_g4	XP_017229977.1	PREDICTED: DEAD-box ATP-dependent RNA helicase 11-like [Daucus carota subsp. sativus]	Daucus_carota	97.2	1.9e-88
TRINITY_DN16495_c0_g1	XP_005648609.1	ribosomal protein L37 component of cytosolic 80S ribosome and 60S large subunit [Coccomyxa subellipsoidea C-169]	Coccomyxa_subellipsoidea	72.8	1.8e-32
TRINITY_DN16495_c0_g2	XP_021275539.1	60S ribosomal protein L37-1-like [Herrania umbratica]	Herrania_umbratica	73.9	1.6e-30
TRINITY_DN16496_c0_g1	XP_017222035.1	PREDICTED: KAT8 regulatory NSL complex subunit 3 [Daucus carota subsp. sativus]	Daucus_carota	73.7	1.5e-96
TRINITY_DN16501_c0_g1	XP_017232120.1	PREDICTED: syntaxin-43 [Daucus carota subsp. sativus]	Daucus_carota	92.9	1.3e-154
TRINITY_DN16504_c0_g2	XP_018452244.1	PREDICTED: pentatricopeptide repeat-containing protein At3g48810 [Raphanus sativus]	Raphanus_sativus	71	1.4e-17
TRINITY_DN16505_c0_g1	XP_017235845.1	PREDICTED: ubiquitin fusion degradation protein 1 homolog [Daucus carota subsp. sativus]	Daucus_carota	81.9	1.5e-140
TRINITY_DN16508_c0_g2	BAF20369.2	Os06g0696400 [Oryza sativa Japonica Group]	Oryza_sativa	100	1.8e-60
TRINITY_DN16508_c0_g4	XP_015634302.1	xyloglucan endotransglucosylase/hydrolase protein 9 isoform X2 [Oryza sativa Japonica Group]	Oryza_sativa	100	1.7e-15
TRINITY_DN16509_c0_g1	XP_017243042.1	PREDICTED: STS14 protein [Daucus carota subsp. sativus]	Daucus_carota	85.6	9e-72
TRINITY_DN16510_c1_g1	XP_017217738.1	PREDICTED: uncharacterized protein LOC108195293 [Daucus carota subsp. sativus]	Daucus_carota	77.3	9e-100
TRINITY_DN16513_c0_g1	XP_017224236.1	PREDICTED: E3 ubiquitin-protein ligase RING1-like [Daucus carota subsp. sativus]	Daucus_carota	58.2	3.3e-95
TRINITY_DN16515_c0_g1	XP_017215810.1	PREDICTED: 17.8 kDa class I heat shock protein-like [Daucus carota subsp. sativus]	Daucus_carota	88.2	9.6e-70
TRINITY_DN16518_c0_g1	BAJ94564.1	predicted protein [Hordeum vulgare subsp. vulgare]	Hordeum_vulgare	88.1	3.6e-63
TRINITY_DN16519_c0_g1	XP_020208193.1	putative calcium-binding protein CML19 [Cajanus cajan]	Cajanus_cajan	73.5	2.6e-12
TRINITY_DN16520_c0_g1	KZN06847.1	hypothetical protein DCAR_007684 [Daucus carota subsp. sativus]	Daucus_carota	66.7	2.6e-15
TRINITY_DN16523_c0_g1	KZN05188.1	hypothetical protein DCAR_006025 [Daucus carota subsp. sativus]	Daucus_carota	44.4	6.7e-07
TRINITY_DN16524_c0_g2	RZC00222.1	putative mitochondrial-processing peptidase subunit beta, mitochondrial isoform C [Glycine soja]	Glycine_soja	100	8.1e-32
TRINITY_DN16526_c0_g2	XP_017230937.1	PREDICTED: probable periplasmic serine endoprotease DegP-like isoform X2 [Daucus carota subsp. sativus]	Daucus_carota	50.8	1.4e-111
TRINITY_DN16531_c0_g1	XP_023926151.1	60S ribosomal protein L44 [Quercus suber]	Quercus_suber	79.4	3.2e-37
TRINITY_DN16531_c0_g2	XP_003063986.1	predicted protein [Micromonas pusilla CCMP1545]	Micromonas_pusilla	73.3	1.7e-37
TRINITY_DN16532_c0_g1	XP_017234695.1	PREDICTED: ylmG homolog protein 1-2, chloroplastic-like [Daucus carota subsp. sativus]	Daucus_carota	92.9	5.3e-56
TRINITY_DN16532_c0_g2	XP_017234695.1	PREDICTED: ylmG homolog protein 1-2, chloroplastic-like [Daucus carota subsp. sativus]	Daucus_carota	39.1	6.9e-15
TRINITY_DN16533_c0_g1	XP_021677964.1	cyclin-dependent protein kinase inhibitor SMR10-like [Hevea brasiliensis]	Hevea_brasiliensis	38.2	1.6e-06
TRINITY_DN16534_c0_g1	AAP41847.1	senescence-associated cysteine protease [Anthurium andraeanum]	Anthurium_andraeanum	51.7	1.7e-08
TRINITY_DN16535_c0_g1	XP_017250115.1	PREDICTED: uncharacterized oxidoreductase At4g09670-like [Daucus carota subsp. sativus]	Daucus_carota	81.7	2.8e-169
TRINITY_DN16538_c0_g1	EAZ37421.1	hypothetical protein OsJ_21756 [Oryza sativa Japonica Group]	Oryza_sativa	99.8	3.1e-222
TRINITY_DN16541_c0_g1	XP_017231353.1	PREDICTED: copper chaperone for superoxide dismutase, chloroplastic/cytosolic [Daucus carota subsp. sativus]	Daucus_carota	94.3	1.8e-40
TRINITY_DN16544_c0_g2	XP_017253151.1	PREDICTED: phospholipid--sterol O-acyltransferase-like isoform X1 [Daucus carota subsp. sativus]	Daucus_carota	89.5	2.4e-57
TRINITY_DN16548_c0_g1	XP_017236808.1	PREDICTED: proteasome subunit alpha type-4 [Daucus carota subsp. sativus]	Daucus_carota	97.6	3.2e-132
TRINITY_DN16557_c0_g2	XP_017247396.1	PREDICTED: 3-hydroxybutyryl-CoA dehydrogenase [Daucus carota subsp. sativus]	Daucus_carota	94.4	1.5e-84
TRINITY_DN16561_c0_g1	XP_017226716.1	PREDICTED: E3 ubiquitin-protein ligase RDUF2-like [Daucus carota subsp. sativus]	Daucus_carota	61.3	2.4e-59
TRINITY_DN16564_c0_g1	XP_017227080.1	PREDICTED: uncharacterized protein LOC108202951 isoform X2 [Daucus carota subsp. sativus]	Daucus_carota	72.9	3.5e-22
TRINITY_DN16565_c0_g1	XP_017238089.1	PREDICTED: uncharacterized protein LOC108211094 [Daucus carota subsp. sativus]	Daucus_carota	76.3	5.1e-106
TRINITY_DN16568_c0_g1	XP_017237084.1	PREDICTED: E3 ubiquitin-protein ligase RNF4 [Daucus carota subsp. sativus]	Daucus_carota	71.6	1.4e-29
TRINITY_DN16568_c0_g2	XP_017237084.1	PREDICTED: E3 ubiquitin-protein ligase RNF4 [Daucus carota subsp. sativus]	Daucus_carota	69.1	4.8e-34
TRINITY_DN16570_c0_g1	XP_017254523.1	PREDICTED: serine/arginine-rich SC35-like splicing factor SCL33 [Daucus carota subsp. sativus]	Daucus_carota	94.9	3.1e-34
TRINITY_DN16575_c0_g1	BAK00513.1	predicted protein [Hordeum vulgare subsp. vulgare]	Hordeum_vulgare	59.5	6.6e-24
TRINITY_DN16575_c0_g2	BAK00513.1	predicted protein [Hordeum vulgare subsp. vulgare]	Hordeum_vulgare	60.7	2.4e-24
TRINITY_DN16575_c0_g3	BAK00513.1	predicted protein [Hordeum vulgare subsp. vulgare]	Hordeum_vulgare	58.3	3e-23
TRINITY_DN16578_c0_g3	GAQ77990.1	T-complex protein 1 alpha subunit [Klebsormidium nitens]	Klebsormidium_nitens	68.8	4.2e-21
TRINITY_DN16578_c0_g4	XP_021613380.1	T-complex protein 1 subunit alpha [Manihot esculenta]	Manihot_esculenta	81.7	2e-29
TRINITY_DN16583_c1_g1	XP_017240267.1	PREDICTED: acid phosphatase 1-like isoform X1 [Daucus carota subsp. sativus]	Daucus_carota	77.1	5.1e-111
TRINITY_DN16587_c0_g1	KOM29886.1	hypothetical protein LR48_Vigan831s000400 [Vigna angularis]	Vigna_angularis	96.4	7.6e-48
TRINITY_DN16590_c0_g1	XP_017249565.1	PREDICTED: expansin-B3 [Daucus carota subsp. sativus]	Daucus_carota	87.4	2.4e-136
TRINITY_DN16592_c0_g1	GAQ86763.1	Ribosomal protein S8e family protein [Klebsormidium nitens]	Klebsormidium_nitens	68.1	6.1e-26
TRINITY_DN16593_c0_g1	PTQ26378.1	LOW QUALITY PROTEIN: hypothetical protein MARPO_2248s0001 [Marchantia polymorpha]	Marchantia_polymorpha	93.3	1.3e-24
TRINITY_DN16597_c0_g2	XP_003519090.1	eukaryotic translation initiation factor 3 subunit E [Glycine max]	Glycine_max	100	2.8e-35
TRINITY_DN16600_c0_g2	KZM88018.1	hypothetical protein DCAR_031519 [Daucus carota subsp. sativus]	Daucus_carota	97.4	8.9e-59
TRINITY_DN16600_c0_g3	XP_017218497.1	PREDICTED: dihydroxy-acid dehydratase, chloroplastic [Daucus carota subsp. sativus]	Daucus_carota	90.1	2.1e-249
TRINITY_DN16602_c0_g1	XP_017250008.1	PREDICTED: uncharacterized protein LOC108220677 [Daucus carota subsp. sativus]	Daucus_carota	72.9	5.5e-30
TRINITY_DN16602_c0_g2	XP_017250008.1	PREDICTED: uncharacterized protein LOC108220677 [Daucus carota subsp. sativus]	Daucus_carota	66.2	5.1e-21
TRINITY_DN16604_c0_g1	XP_002953917.1	hypothetical protein VOLCADRAFT_82555 [Volvox carteri f. nagariensis]	Volvox_carteri	35.1	4.4e-28
TRINITY_DN16606_c0_g2	XP_017235984.1	PREDICTED: BTB/POZ domain-containing protein POB1 [Daucus carota subsp. sativus]	Daucus_carota	96.6	1.7e-80
TRINITY_DN16607_c0_g1	XP_017229110.1	PREDICTED: photosystem II reaction center PSB28 protein, chloroplastic [Daucus carota subsp. sativus]	Daucus_carota	88.8	2.7e-84
TRINITY_DN16609_c1_g1	KZN09537.1	hypothetical protein DCAR_002193 [Daucus carota subsp. sativus]	Daucus_carota	94.1	4.4e-68
TRINITY_DN16612_c0_g1	XP_023901654.1	eukaryotic peptide chain release factor GTP-binding subunit-like [Quercus suber]	Quercus_suber	45.6	1.8e-10
TRINITY_DN16614_c0_g1	BAT77654.1	hypothetical protein VIGAN_02024400 [Vigna angularis var. angularis]	Vigna_angularis	87.8	5.7e-14
TRINITY_DN16614_c0_g2	PQQ05812.1	pentatricopeptide repeat-containing protein [Prunus yedoensis var. nudiflora]	Prunus_yedoensis	62.8	1.5e-56
TRINITY_DN16617_c0_g1	XP_017225089.1	PREDICTED: endoribonuclease Dicer homolog 2-like isoform X2 [Daucus carota subsp. sativus]	Daucus_carota	64.2	8.2e-44
TRINITY_DN16619_c0_g1	XP_017253961.1	PREDICTED: xyloglucan galactosyltransferase XLT2 [Daucus carota subsp. sativus]	Daucus_carota	74.6	7.2e-217
TRINITY_DN16622_c0_g1	XP_017249511.1	PREDICTED: uncharacterized protein At4g14100-like [Daucus carota subsp. sativus]	Daucus_carota	75.5	5.6e-86
TRINITY_DN16625_c0_g1	GBG68263.1	hypothetical protein CBR_g2812 [Chara braunii]	Chara_braunii	64.1	1e-23
TRINITY_DN16625_c0_g2	GBG68263.1	hypothetical protein CBR_g2812 [Chara braunii]	Chara_braunii	67.4	1.7e-24
TRINITY_DN16625_c0_g3	XP_002953563.1	component of cytosolic 80S ribosome and 60S large subunit [Volvox carteri f. nagariensis]	Volvox_carteri	63.6	3e-22
TRINITY_DN16626_c0_g1	XP_015630639.1	40S ribosomal protein S19-like [Oryza sativa Japonica Group]	Oryza_sativa	99.3	3e-79
TRINITY_DN16628_c0_g3	RLM73908.1	casein kinase I isoform alpha-like [Panicum miliaceum]	Panicum_miliaceum	73.3	9.3e-12
TRINITY_DN16631_c0_g1	XP_006654725.2	PREDICTED: 60S ribosomal protein L28-1-like [Oryza brachyantha]	Oryza_brachyantha	94.1	4e-82
TRINITY_DN16633_c0_g1	XP_017246314.1	PREDICTED: uncharacterized protein LOC108217823 [Daucus carota subsp. sativus]	Daucus_carota	51.1	3.9e-59
TRINITY_DN16634_c0_g2	XP_017227343.1	PREDICTED: uncharacterized protein LOC108203111 isoform X1 [Daucus carota subsp. sativus]	Daucus_carota	74.3	1.9e-112
TRINITY_DN16637_c0_g1	NP_001241191.1	uncharacterized protein LOC100799919 [Glycine max]	Glycine_max	100	9e-37
TRINITY_DN16638_c2_g1	XP_006576480.1	dirigent protein 22 [Glycine max]	Glycine_max	100	1.7e-105
TRINITY_DN16642_c0_g1	XP_017217464.1	PREDICTED: uncharacterized protein LOC108195040 [Daucus carota subsp. sativus]	Daucus_carota	50.6	2.1e-136
TRINITY_DN16643_c0_g1	NP_001242140.2	glutathione S-transferase [Glycine max]	Glycine_max	100	1.8e-136
TRINITY_DN16647_c0_g1	OVA14269.1	Argonaute/Dicer protein [Macleaya cordata]	Macleaya_cordata	82.4	4.4e-24
TRINITY_DN1664_c0_g1	EEC76241.1	hypothetical protein OsI_13666 [Oryza sativa Indica Group]	Oryza_sativa	100	3.5e-22
TRINITY_DN16650_c0_g2	BAF25255.1	Os09g0453100, partial [Oryza sativa Japonica Group]	Oryza_sativa	100	2.8e-11
TRINITY_DN16650_c0_g4	XP_015640661.1	glutamate--cysteine ligase A, chloroplastic [Oryza sativa Japonica Group]	Oryza_sativa	100	8e-15
TRINITY_DN16653_c0_g2	CAJ38366.1	histone H1 [Plantago major]	Plantago_major	72.2	3.7e-27
TRINITY_DN16656_c0_g1	KZN09748.1	hypothetical protein DCAR_002404 [Daucus carota subsp. sativus]	Daucus_carota	56.2	7.6e-14
TRINITY_DN16657_c0_g1	BAJ99430.1	predicted protein [Hordeum vulgare subsp. vulgare]	Hordeum_vulgare	65.3	5.5e-30
TRINITY_DN16657_c0_g2	BAJ99430.1	predicted protein [Hordeum vulgare subsp. vulgare]	Hordeum_vulgare	66.3	4.2e-30
TRINITY_DN16660_c0_g1	XP_017249258.1	PREDICTED: uncharacterized protein LOC108220099 [Daucus carota subsp. sativus]	Daucus_carota	77.7	2.8e-56
TRINITY_DN16665_c0_g1	XP_022839771.1	Histidine kinase-like ATPase, ATP-binding domain [Ostreococcus tauri]	Ostreococcus_tauri	64.5	7.2e-21
TRINITY_DN16668_c0_g2	KZN09434.1	hypothetical protein DCAR_002090 [Daucus carota subsp. sativus]	Daucus_carota	88.7	4e-242
TRINITY_DN16670_c0_g1	KZM96932.1	hypothetical protein DCAR_015706 [Daucus carota subsp. sativus]	Daucus_carota	74	5.5e-170
TRINITY_DN16672_c0_g1	XP_017236564.1	PREDICTED: 30S ribosomal protein S16-like [Daucus carota subsp. sativus]	Daucus_carota	90.6	2e-61
TRINITY_DN16675_c0_g1	NP_001236198.2	17.5 kDa class I heat shock protein [Glycine max]	Glycine_max	100	5.5e-33
TRINITY_DN16680_c0_g1	KZM86832.1	hypothetical protein DCAR_023966 [Daucus carota subsp. sativus]	Daucus_carota	84	3.1e-37
TRINITY_DN16680_c0_g2	KZM86832.1	hypothetical protein DCAR_023966 [Daucus carota subsp. sativus]	Daucus_carota	95.6	2.2e-45
TRINITY_DN16684_c0_g1	KZN07039.1	hypothetical protein DCAR_007876 [Daucus carota subsp. sativus]	Daucus_carota	69.4	5.1e-21
TRINITY_DN16684_c0_g2	XP_017244165.1	PREDICTED: sufE-like protein 1, chloroplastic/mitochondrial [Daucus carota subsp. sativus]	Daucus_carota	79.8	3.3e-150
TRINITY_DN16685_c0_g1	NP_001236884.1	uncharacterized protein LOC100526985 [Glycine max]	Glycine_max	100	2.6e-33
TRINITY_DN16690_c0_g1	XP_017218875.1	PREDICTED: pentatricopeptide repeat-containing protein At1g10910, chloroplastic [Daucus carota subsp. sativus]	Daucus_carota	87.1	3.7e-134
TRINITY_DN16692_c0_g1	XP_017255491.1	PREDICTED: uncharacterized protein LOC108225180 [Daucus carota subsp. sativus]	Daucus_carota	75.5	4.9e-41
TRINITY_DN16694_c0_g3	XP_024022668.1	uncharacterized protein LOC112091966 [Morus notabilis]	Morus_notabilis	80	5e-73
TRINITY_DN16695_c1_g1	XP_017215174.1	PREDICTED: magnesium protoporphyrin IX methyltransferase, chloroplastic [Daucus carota subsp. sativus]	Daucus_carota	82	4.7e-119
TRINITY_DN16696_c0_g2	XP_017244328.1	PREDICTED: uncharacterized protein LOC108216152 [Daucus carota subsp. sativus]	Daucus_carota	79.8	1.8e-32
TRINITY_DN16698_c0_g1	XP_017247542.1	PREDICTED: uncharacterized protein LOC108218896 isoform X1 [Daucus carota subsp. sativus]	Daucus_carota	85.3	4.2e-275
TRINITY_DN16698_c0_g2	XP_017247542.1	PREDICTED: uncharacterized protein LOC108218896 isoform X1 [Daucus carota subsp. sativus]	Daucus_carota	84.5	8.6e-123
TRINITY_DN16699_c0_g1	XP_017253901.1	PREDICTED: glycylpeptide N-tetradecanoyltransferase 1-like [Daucus carota subsp. sativus]	Daucus_carota	94.5	2e-243
TRINITY_DN166_c0_g1	KZM95892.1	hypothetical protein DCAR_019134 [Daucus carota subsp. sativus]	Daucus_carota	65.7	2e-14
TRINITY_DN16700_c0_g1	OAY46051.1	hypothetical protein MANES_07G112500 [Manihot esculenta]	Manihot_esculenta	35.8	4.7e-16
TRINITY_DN16702_c0_g2	XP_003523954.1	uncharacterized acetyltransferase At3g50280 [Glycine max]	Glycine_max	100	1.2e-83
TRINITY_DN16705_c0_g1	XP_017222839.1	PREDICTED: aspartate--tRNA ligase 2, cytoplasmic [Daucus carota subsp. sativus]	Daucus_carota	90.9	6.2e-36
TRINITY_DN16706_c0_g1	KZN00448.1	hypothetical protein DCAR_009202 [Daucus carota subsp. sativus]	Daucus_carota	84.1	7.7e-28
TRINITY_DN16708_c0_g1	XP_022891784.1	Werner Syndrome-like exonuclease [Olea europaea var. sylvestris]	Olea_europaea	74.7	1.1e-37
TRINITY_DN16713_c0_g1	XP_017238522.1	PREDICTED: uncharacterized protein LOC108211431 [Daucus carota subsp. sativus]	Daucus_carota	72.4	7.1e-58
TRINITY_DN16715_c0_g1	XP_017233672.1	PREDICTED: protein argonaute 2-like [Daucus carota subsp. sativus]	Daucus_carota	66	9.9e-09
TRINITY_DN16719_c0_g1	XP_017243602.1	PREDICTED: ras-related protein RABC1 [Daucus carota subsp. sativus]	Daucus_carota	89.4	7.5e-16
TRINITY_DN16721_c0_g1	OWM78640.1	hypothetical protein CDL15_Pgr002811 [Punica granatum]	Punica_granatum	94.9	2.2e-22
TRINITY_DN16723_c0_g1	PON49520.1	Major latex protein domain containing protein [Trema orientale]	Trema_orientale	51.3	2.6e-35
TRINITY_DN16725_c0_g1	XP_017244469.1	PREDICTED: protein UPSTREAM OF FLC [Daucus carota subsp. sativus]	Daucus_carota	81	1e-247
TRINITY_DN16726_c0_g1	XP_017244669.1	PREDICTED: cytochrome c oxidase-assembly factor COX23, mitochondrial [Daucus carota subsp. sativus]	Daucus_carota	86.3	3e-27
TRINITY_DN16730_c0_g1	XP_017219849.1	PREDICTED: NASP-related protein sim3 [Daucus carota subsp. sativus]	Daucus_carota	67.4	3.4e-155
TRINITY_DN16733_c0_g3	KZN06232.1	hypothetical protein DCAR_007069 [Daucus carota subsp. sativus]	Daucus_carota	90	1.8e-39
TRINITY_DN16733_c0_g4	XP_017224026.1	PREDICTED: high affinity nitrate transporter 2.5-like [Daucus carota subsp. sativus]	Daucus_carota	94.5	3.6e-51
TRINITY_DN16734_c1_g1	XP_017214802.1	PREDICTED: sodium/pyruvate cotransporter BASS2, chloroplastic-like [Daucus carota subsp. sativus]	Daucus_carota	85.2	1e-190
TRINITY_DN16735_c0_g1	XP_017219761.1	PREDICTED: uncharacterized protein At1g01500 [Daucus carota subsp. sativus]	Daucus_carota	90.7	1.1e-18
TRINITY_DN16739_c0_g1	BAK04589.1	predicted protein [Hordeum vulgare subsp. vulgare]	Hordeum_vulgare	39.2	6.2e-48
TRINITY_DN16741_c0_g1	XP_017255254.1	PREDICTED: mitochondrial inner membrane protease atp23 [Daucus carota subsp. sativus]	Daucus_carota	82.7	9.6e-95
TRINITY_DN16743_c0_g1	XP_017219588.1	PREDICTED: uncharacterized protein LOC108196696 [Daucus carota subsp. sativus]	Daucus_carota	71.4	0
TRINITY_DN16749_c0_g1	XP_017249361.1	PREDICTED: indole-3-glycerol phosphate synthase, chloroplastic-like [Daucus carota subsp. sativus]	Daucus_carota	82.9	7.8e-185
TRINITY_DN16752_c0_g2	ACU24391.1	unknown [Glycine max]	Glycine_max	98.7	1.3e-38
TRINITY_DN16754_c0_g1	BAK05588.1	predicted protein [Hordeum vulgare subsp. vulgare]	Hordeum_vulgare	85.6	8.2e-47
TRINITY_DN16754_c0_g3	BAK05588.1	predicted protein [Hordeum vulgare subsp. vulgare]	Hordeum_vulgare	88.8	5.6e-48
TRINITY_DN16754_c0_g4	BAK05588.1	predicted protein [Hordeum vulgare subsp. vulgare]	Hordeum_vulgare	92.3	1.8e-35
TRINITY_DN16762_c0_g1	KZN05622.1	hypothetical protein DCAR_006459 [Daucus carota subsp. sativus]	Daucus_carota	63.6	7.5e-63
TRINITY_DN16765_c0_g1	XP_017238481.1	PREDICTED: protein ROOT PRIMORDIUM DEFECTIVE 1-like [Daucus carota subsp. sativus]	Daucus_carota	74.7	5.4e-207
TRINITY_DN16767_c0_g1	KZM92533.1	hypothetical protein DCAR_020102 [Daucus carota subsp. sativus]	Daucus_carota	65.8	5.5e-71
TRINITY_DN16770_c0_g2	XP_017224353.1	PREDICTED: RNA demethylase ALKBH5-like [Daucus carota subsp. sativus]	Daucus_carota	73.8	8.6e-155
TRINITY_DN16771_c0_g1	KZN08983.1	hypothetical protein DCAR_001639 [Daucus carota subsp. sativus]	Daucus_carota	91.6	3.7e-119
TRINITY_DN16773_c0_g1	OIV90531.1	hypothetical protein TanjilG_32408 [Lupinus angustifolius]	Lupinus_angustifolius	95.9	1.2e-32
TRINITY_DN16774_c0_g2	XP_017224100.1	PREDICTED: uncharacterized protein LOC108200456 isoform X1 [Daucus carota subsp. sativus]	Daucus_carota	64	2.4e-06
TRINITY_DN16775_c0_g1	XP_017241684.1	PREDICTED: SUMO-conjugating enzyme UBC9-like [Daucus carota subsp. sativus]	Daucus_carota	98.6	8.5e-77
TRINITY_DN16776_c0_g1	KHN43515.1	Hypothetical protein glysoja_002098 [Glycine soja]	Glycine_soja	100	3.3e-21
TRINITY_DN16776_c1_g1	NP_001236771.2	alpha-crystallin-Hsps_p23-like domain-containing protein [Glycine max]	Glycine_max	99.2	3.3e-65
TRINITY_DN1677_c0_g1	XP_015643398.1	glycine cleavage system H protein 2, mitochondrial [Oryza sativa Japonica Group]	Oryza_sativa	100	6.1e-36
TRINITY_DN16782_c0_g1	XP_017223760.1	PREDICTED: lysine-specific histone demethylase 1 homolog 1 [Daucus carota subsp. sativus]	Daucus_carota	86.1	0
TRINITY_DN16783_c0_g2	GAQ86486.1	mitogen-activated protein kinase [Klebsormidium nitens]	Klebsormidium_nitens	44.3	1.5e-16
TRINITY_DN16786_c0_g2	XP_017244705.1	PREDICTED: uncharacterized protein LOC108216449 isoform X2 [Daucus carota subsp. sativus]	Daucus_carota	93.1	2.5e-66
TRINITY_DN16788_c0_g2	XP_006358337.1	PREDICTED: homeobox-leucine zipper protein HAT4 [Solanum tuberosum]	Solanum_tuberosum	57.8	8.2e-23
TRINITY_DN16797_c0_g1	KZN00208.1	hypothetical protein DCAR_008962 [Daucus carota subsp. sativus]	Daucus_carota	93	1.5e-12
TRINITY_DN16798_c0_g3	RWR83433.1	60S acidic ribosomal protein P2B-like protein [Cinnamomum micranthum f. kanehirae]	Cinnamomum_micranthum	63.8	1.9e-17
TRINITY_DN16801_c0_g1	XP_017218662.1	PREDICTED: peroxisomal membrane protein PEX14 [Daucus carota subsp. sativus]	Daucus_carota	83.5	4.7e-65
TRINITY_DN16801_c0_g2	XP_017218662.1	PREDICTED: peroxisomal membrane protein PEX14 [Daucus carota subsp. sativus]	Daucus_carota	81.1	5.1e-22
TRINITY_DN16803_c0_g1	NP_001235424.1	uncharacterized protein LOC100527647 [Glycine max]	Glycine_max	100	7.9e-75
TRINITY_DN16806_c0_g1	XP_017220768.1	PREDICTED: uncharacterized protein LOC108197615 [Daucus carota subsp. sativus]	Daucus_carota	67.5	5e-65
TRINITY_DN16807_c0_g1	XP_025882456.1	ricin B-like lectin R40G3 [Oryza sativa Japonica Group]	Oryza_sativa	100	1.1e-10
TRINITY_DN16807_c0_g2	EAZ05175.1	hypothetical protein OsI_27370 [Oryza sativa Indica Group]	Oryza_sativa	96.7	1.2e-32
TRINITY_DN16808_c0_g1	XP_017234362.1	PREDICTED: probable 2-oxoglutarate-dependent dioxygenase AOP1 [Daucus carota subsp. sativus]	Daucus_carota	88.2	1.6e-168
TRINITY_DN16810_c3_g1	XP_017218952.1	PREDICTED: zinc finger CCCH domain-containing protein 39-like [Daucus carota subsp. sativus]	Daucus_carota	62.5	2.2e-08
TRINITY_DN16812_c0_g2	NP_001240972.1	cytochrome P450 82A3 [Glycine max]	Glycine_max	99	1.8e-48
TRINITY_DN16816_c0_g2	XP_017243852.1	PREDICTED: 50S ribosomal protein L22-like [Daucus carota subsp. sativus]	Daucus_carota	85	2.2e-122
TRINITY_DN16818_c0_g1	XP_017255162.1	PREDICTED: cytochrome P450 CYP736A12-like [Daucus carota subsp. sativus]	Daucus_carota	71.2	5.2e-214
TRINITY_DN16824_c1_g2	XP_017247200.1	PREDICTED: ATP-dependent Clp protease ATP-binding subunit CLPT1, chloroplastic [Daucus carota subsp. sativus]	Daucus_carota	73.1	3.4e-84
TRINITY_DN16827_c0_g1	AAC15238.1	globulin-like protein [Daucus carota]	Daucus_carota	79.5	5.3e-30
TRINITY_DN16827_c0_g3	XP_017253394.1	PREDICTED: activator of 90 kDa heat shock protein ATPase homolog [Daucus carota subsp. sativus]	Daucus_carota	85.2	3.4e-169
TRINITY_DN16832_c1_g1	NP_001239923.1	uncharacterized protein LOC100813879 [Glycine max]	Glycine_max	100	1.4e-38
TRINITY_DN16834_c0_g1	KZM88400.1	hypothetical protein DCAR_025475 [Daucus carota subsp. sativus]	Daucus_carota	96.4	1.3e-23
TRINITY_DN16839_c0_g1	XP_017258102.1	PREDICTED: cellulose synthase-like protein D3 [Daucus carota subsp. sativus]	Daucus_carota	98.1	1.1e-52
TRINITY_DN1683_c0_g1	XP_017239717.1	PREDICTED: uncharacterized protein LOC108212505 [Daucus carota subsp. sativus]	Daucus_carota	55.2	8.6e-18
TRINITY_DN16840_c1_g1	XP_023901497.1	ATP-dependent RNA helicase eIF4A [Quercus suber]	Quercus_suber	100	1.7e-36
TRINITY_DN16844_c0_g1	XP_010922436.1	PREDICTED: 60S ribosomal protein L35 [Elaeis guineensis]	Elaeis_guineensis	66.7	2.3e-33
TRINITY_DN16844_c0_g2	XP_010922436.1	PREDICTED: 60S ribosomal protein L35 [Elaeis guineensis]	Elaeis_guineensis	69.9	1.1e-35
TRINITY_DN16845_c0_g1	PSC72562.1	Splicing factor 3B subunit 1 [Micractinium conductrix]	Micractinium_conductrix	83.1	2.4e-36
TRINITY_DN16846_c0_g1	XP_017216165.1	PREDICTED: RWD domain-containing protein 1 [Daucus carota subsp. sativus]	Daucus_carota	85.6	5.2e-92
TRINITY_DN16849_c0_g2	XP_017251260.1	PREDICTED: putative glutathione-specific gamma-glutamylcyclotransferase 2 [Daucus carota subsp. sativus]	Daucus_carota	73.2	1.1e-52
TRINITY_DN16850_c0_g2	P13993.1	RecName: Full=Repetitive proline-rich cell wall protein 2; Flags: Precursor	Glycine_max	100	2.3e-07
TRINITY_DN16850_c0_g3	KRH37835.1	hypothetical protein GLYMA_09G093000 [Glycine max]	Glycine_max	100	8.3e-08
TRINITY_DN16851_c0_g1	XP_017228152.1	PREDICTED: uncharacterized protein LOC108203659 [Daucus carota subsp. sativus]	Daucus_carota	94.5	2.6e-33
TRINITY_DN16853_c0_g1	PKA63291.1	Retrovirus-related Pol polyprotein from transposon TNT 1-94 [Apostasia shenzhenica]	Apostasia_shenzhenica	52.7	1e-07
TRINITY_DN16854_c0_g1	XP_017255381.1	PREDICTED: membrane magnesium transporter [Daucus carota subsp. sativus]	Daucus_carota	88.6	3.3e-47
TRINITY_DN16856_c0_g1	XP_017243533.1	PREDICTED: protein ABA DEFICIENT 4, chloroplastic-like [Daucus carota subsp. sativus]	Daucus_carota	82.4	6.3e-109
TRINITY_DN16857_c0_g2	XP_009795795.1	PREDICTED: uncharacterized protein LOC104242446 [Nicotiana sylvestris]	Nicotiana_sylvestris	75.6	6.7e-12
TRINITY_DN16861_c0_g1	RZC21661.1	40S ribosomal protein S28 [Glycine soja]	Glycine_soja	93.3	7.6e-30
TRINITY_DN16866_c0_g2	KZM83989.1	hypothetical protein DCAR_028589 [Daucus carota subsp. sativus]	Daucus_carota	89	8.8e-42
TRINITY_DN16868_c0_g1	XP_017216723.1	PREDICTED: calcium-binding and coiled-coil domain-containing protein 2-like isoform X1 [Daucus carota subsp. sativus]	Daucus_carota	63.8	2.7e-65
TRINITY_DN16869_c0_g4	XP_017237217.1	PREDICTED: uncharacterized protein LOC108210445 isoform X1 [Daucus carota subsp. sativus]	Daucus_carota	73.9	6e-98
TRINITY_DN16870_c0_g1	AAS21304.1	mitogen-activated protein kinase kinase 2 [Petroselinum crispum]	Petroselinum_crispum	90.8	1.5e-68
TRINITY_DN16873_c0_g2	XP_017217916.1	PREDICTED: pentatricopeptide repeat-containing protein At1g66345, mitochondrial [Daucus carota subsp. sativus]	Daucus_carota	69.8	4.2e-14
TRINITY_DN16874_c0_g1	XP_017258854.1	PREDICTED: kinesin-like protein KIN-7O isoform X1 [Daucus carota subsp. sativus]	Daucus_carota	63.1	9.2e-206
TRINITY_DN16879_c0_g1	OAE25935.1	hypothetical protein AXG93_1712s1130 [Marchantia polymorpha subsp. ruderalis]	Marchantia_polymorpha	62.5	3.1e-37
TRINITY_DN1687_c0_g1	XP_015643751.1	pheophytinase, chloroplastic isoform X2 [Oryza sativa Japonica Group]	Oryza_sativa	100	1.6e-45
TRINITY_DN16880_c0_g1	CDP03741.1	unnamed protein product [Coffea canephora]	Coffea_canephora	40.3	8.7e-24
TRINITY_DN16884_c0_g1	XP_017257888.1	PREDICTED: F-box/LRR-repeat protein 10 [Daucus carota subsp. sativus]	Daucus_carota	83	2.1e-287
TRINITY_DN16886_c0_g1	XP_023892599.1	protein yop1-like, partial [Quercus suber]	Quercus_suber	39.5	7.2e-21
TRINITY_DN16887_c0_g1	XP_017248560.1	PREDICTED: transcription initiation factor TFIID subunit 5 [Daucus carota subsp. sativus]	Daucus_carota	90.6	8e-216
TRINITY_DN16888_c0_g2	XP_017248488.1	PREDICTED: shaggy-related protein kinase epsilon-like [Daucus carota subsp. sativus]	Daucus_carota	88.4	3.1e-224
TRINITY_DN1688_c0_g1	XP_013902846.1	60S acidic ribosomal protein P1 [Monoraphidium neglectum]	Monoraphidium_neglectum	64.1	6.1e-16
TRINITY_DN16890_c0_g1	XP_017216612.1	PREDICTED: ethylene-responsive transcription factor ERF008-like [Daucus carota subsp. sativus]	Daucus_carota	79.4	7.3e-54
TRINITY_DN16894_c0_g1	XP_017235302.1	PREDICTED: CASP-like protein 1F1 [Daucus carota subsp. sativus]	Daucus_carota	74.3	3.2e-69
TRINITY_DN16895_c0_g1	PSC67282.1	polyadenylate-binding 1 [Micractinium conductrix]	Micractinium_conductrix	28.3	2.6e-10
TRINITY_DN16898_c0_g2	RZB77317.1	Nuclear pore complex protein NUP98A isoform C [Glycine soja]	Glycine_soja	100	4.6e-36
TRINITY_DN16900_c0_g2	RZC09398.1	Protein translation factor SUI1-like 1 isoform A [Glycine soja]	Glycine_soja	100	4.5e-24
TRINITY_DN16903_c0_g1	XP_017254670.1	PREDICTED: probable calcium-binding protein CML35 [Daucus carota subsp. sativus]	Daucus_carota	73.8	1.9e-60
TRINITY_DN16909_c0_g2	KZM83600.1	hypothetical protein DCAR_031169 [Daucus carota subsp. sativus]	Daucus_carota	82.9	4.6e-28
TRINITY_DN16913_c1_g1	XP_017232697.1	PREDICTED: uncharacterized protein LOC108206795 [Daucus carota subsp. sativus]	Daucus_carota	56.8	6.8e-43
TRINITY_DN16913_c1_g4	PSS30110.1	Chaperone protein like [Actinidia chinensis var. chinensis]	Actinidia_chinensis	44.3	4.6e-28
TRINITY_DN16920_c0_g1	XP_017257391.1	PREDICTED: VQ motif-containing protein 10 [Daucus carota subsp. sativus]	Daucus_carota	87.5	4.3e-13
TRINITY_DN16922_c0_g1	RVX14679.1	Retrovirus-related Pol polyprotein from transposon TNT 1-94 [Vitis vinifera]	Vitis_vinifera	80.6	3.8e-35
TRINITY_DN16922_c0_g4	RVW68266.1	Retrovirus-related Pol polyprotein from transposon TNT 1-94 [Vitis vinifera]	Vitis_vinifera	61.4	2.5e-17
TRINITY_DN16922_c0_g5	XP_017252491.1	PREDICTED: uncharacterized protein LOC108222984 [Daucus carota subsp. sativus]	Daucus_carota	79.5	1.4e-33
TRINITY_DN16923_c0_g1	XP_023885898.1	guanine nucleotide-binding protein alpha-3 subunit-like [Quercus suber]	Quercus_suber	68.5	1.1e-21
TRINITY_DN16926_c0_g1	XP_017217680.1	PREDICTED: ferritin-2, chloroplastic [Daucus carota subsp. sativus]	Daucus_carota	71.2	3e-90
TRINITY_DN16931_c0_g1	XP_017243368.1	PREDICTED: uncharacterized protein LOC108215381 [Daucus carota subsp. sativus]	Daucus_carota	81	8.5e-298
TRINITY_DN16932_c0_g1	XP_017237736.1	PREDICTED: uncharacterized protein At2g27730, mitochondrial-like [Daucus carota subsp. sativus]	Daucus_carota	81	8.9e-40
TRINITY_DN16933_c0_g1	XP_017253221.1	PREDICTED: transmembrane ascorbate ferrireductase 1 [Daucus carota subsp. sativus]	Daucus_carota	62.3	1.9e-30
TRINITY_DN16937_c0_g1	KZM99839.1	hypothetical protein DCAR_012799 [Daucus carota subsp. sativus]	Daucus_carota	68.8	4.5e-20
TRINITY_DN16941_c0_g1	XP_017245766.1	PREDICTED: protein DETOXIFICATION 21-like [Daucus carota subsp. sativus]	Daucus_carota	86.1	3.7e-47
TRINITY_DN16941_c0_g2	XP_017247830.1	PREDICTED: protein DETOXIFICATION 21-like [Daucus carota subsp. sativus]	Daucus_carota	86.9	3.3e-174
TRINITY_DN16945_c0_g1	KZN10526.1	hypothetical protein DCAR_003182 [Daucus carota subsp. sativus]	Daucus_carota	92.8	3.8e-35
TRINITY_DN16948_c0_g3	XP_017242275.1	PREDICTED: phosphoinositide phosphatase SAC1-like [Daucus carota subsp. sativus]	Daucus_carota	76.2	8.2e-124
TRINITY_DN16950_c0_g2	BAO79434.1	GmUGT3 protein [Glycine max]	Glycine_max	96.2	6.9e-35
TRINITY_DN16953_c0_g1	XP_017216036.1	PREDICTED: uncharacterized protein LOC108193738 [Daucus carota subsp. sativus]	Daucus_carota	63.4	3e-52
TRINITY_DN16957_c0_g2	XP_024009080.1	actin-depolymerizing factor 10 isoform X1 [Eutrema salsugineum]	Eutrema_salsugineum	34.4	2.9e-16
TRINITY_DN16959_c3_g1	XP_017222868.1	PREDICTED: cryptochrome-1-like [Daucus carota subsp. sativus]	Daucus_carota	84.6	1.1e-77
TRINITY_DN16960_c0_g2	AIE12482.1	UGT11 [Panax ginseng]	Panax_ginseng	75	2.9e-17
TRINITY_DN16961_c0_g1	XP_017242275.1	PREDICTED: phosphoinositide phosphatase SAC1-like [Daucus carota subsp. sativus]	Daucus_carota	71.3	5.9e-51
TRINITY_DN16963_c0_g1	XP_017240646.1	PREDICTED: uncharacterized protein LOC108213369 [Daucus carota subsp. sativus]	Daucus_carota	68.6	4e-22
TRINITY_DN16966_c0_g1	KZN11939.1	hypothetical protein DCAR_004595 [Daucus carota subsp. sativus]	Daucus_carota	58.2	1.6e-07
TRINITY_DN16971_c0_g1	XP_017240201.1	PREDICTED: uncharacterized protein LOC108212997 [Daucus carota subsp. sativus]	Daucus_carota	70.5	1.2e-33
TRINITY_DN16974_c0_g1	KZN04087.1	hypothetical protein DCAR_004924 [Daucus carota subsp. sativus]	Daucus_carota	73.1	4.9e-45
TRINITY_DN16974_c0_g3	KZN04087.1	hypothetical protein DCAR_004924 [Daucus carota subsp. sativus]	Daucus_carota	67.9	3.9e-21
TRINITY_DN16975_c0_g2	XP_017244579.1	PREDICTED: transmembrane protein 208 homolog [Daucus carota subsp. sativus]	Daucus_carota	86.5	1.7e-42
TRINITY_DN16976_c0_g2	BAK02536.1	predicted protein, partial [Hordeum vulgare subsp. vulgare]	Hordeum_vulgare	88.8	7.9e-45
TRINITY_DN16978_c3_g4	RYR37322.1	hypothetical protein Ahy_A09g042227 isoform A [Arachis hypogaea]	Arachis_hypogaea	100	2e-38
TRINITY_DN16979_c0_g1	XP_017226897.1	PREDICTED: S-adenosylmethionine decarboxylase proenzyme 4 [Daucus carota subsp. sativus]	Daucus_carota	91.7	2.4e-59
TRINITY_DN16981_c0_g1	XP_017254020.1	PREDICTED: uncharacterized protein LOC108224010 [Daucus carota subsp. sativus]	Daucus_carota	48.9	9.4e-12
TRINITY_DN16981_c0_g2	XP_017230016.1	PREDICTED: protein TRIGALACTOSYLDIACYLGLYCEROL 2, chloroplastic-like [Daucus carota subsp. sativus]	Daucus_carota	89.9	4.4e-177
TRINITY_DN16983_c0_g1	XP_017236276.1	PREDICTED: receptor-like serine/threonine-protein kinase At2g45590 [Daucus carota subsp. sativus]	Daucus_carota	85.2	2.9e-253
TRINITY_DN16983_c0_g2	XP_017236276.1	PREDICTED: receptor-like serine/threonine-protein kinase At2g45590 [Daucus carota subsp. sativus]	Daucus_carota	70.1	1.4e-07
TRINITY_DN16985_c0_g1	XP_017244202.1	PREDICTED: uncharacterized protein LOC108216055 [Daucus carota subsp. sativus]	Daucus_carota	65	7.7e-65
TRINITY_DN16986_c0_g1	XP_017223242.1	PREDICTED: histidine-containing phosphotransfer protein 1-like isoform X1 [Daucus carota subsp. sativus]	Daucus_carota	61.7	3.5e-47
TRINITY_DN16987_c0_g1	KZN09299.1	hypothetical protein DCAR_001955 [Daucus carota subsp. sativus]	Daucus_carota	62.3	5.7e-130
TRINITY_DN16989_c0_g2	XP_017242760.1	PREDICTED: regulatory protein NPR1 [Daucus carota subsp. sativus]	Daucus_carota	81.1	7e-266
TRINITY_DN16990_c0_g1	XP_017216235.1	PREDICTED: UBP1-associated proteins 1C [Daucus carota subsp. sativus]	Daucus_carota	72.5	6.7e-118
TRINITY_DN16991_c1_g1	XP_017221920.1	PREDICTED: VQ motif-containing protein 4 [Daucus carota subsp. sativus]	Daucus_carota	78	4.6e-83
TRINITY_DN16992_c0_g1	XP_017228433.1	PREDICTED: melanoma-associated antigen B2 [Daucus carota subsp. sativus]	Daucus_carota	88.9	5.6e-113
TRINITY_DN16995_c0_g1	XP_017257803.1	PREDICTED: protein SENSITIVITY TO RED LIGHT REDUCED 1 [Daucus carota subsp. sativus]	Daucus_carota	72.9	8.1e-108
TRINITY_DN16998_c0_g2	XP_017251542.1	PREDICTED: outer envelope pore protein 24, chloroplastic-like [Daucus carota subsp. sativus]	Daucus_carota	75.8	5.9e-88
TRINITY_DN16999_c0_g8	GBF90781.1	fructose-1,6-bisphosphate aldolase [Raphidocelis subcapitata]	Raphidocelis_subcapitata	57.6	2.4e-10
TRINITY_DN17000_c0_g1	XP_017243571.1	PREDICTED: probable beta-1,4-xylosyltransferase IRX9H [Daucus carota subsp. sativus]	Daucus_carota	85.3	3.1e-193
TRINITY_DN17004_c0_g4	XP_017237084.1	PREDICTED: E3 ubiquitin-protein ligase RNF4 [Daucus carota subsp. sativus]	Daucus_carota	62	4.5e-38
TRINITY_DN17007_c0_g2	XP_017247809.1	PREDICTED: uncharacterized protein LOC108219067 isoform X1 [Daucus carota subsp. sativus]	Daucus_carota	62.4	7.8e-180
TRINITY_DN17009_c0_g1	XP_017222549.1	PREDICTED: cysteine synthase, chloroplastic/chromoplastic [Daucus carota subsp. sativus]	Daucus_carota	86.9	7.3e-182
TRINITY_DN17010_c0_g1	XP_010674086.1	PREDICTED: 60S ribosomal protein L19-3 [Beta vulgaris subsp. vulgaris]	Beta_vulgaris	74.1	1e-61
TRINITY_DN17010_c0_g2	XP_021772826.1	60S ribosomal protein L19-1-like [Chenopodium quinoa]	Chenopodium_quinoa	71.5	6.8e-61
TRINITY_DN17010_c0_g3	XP_009622145.1	PREDICTED: 60S ribosomal protein L19-3-like [Nicotiana tomentosiformis]	Nicotiana_tomentosiformis	69.9	3.3e-33
TRINITY_DN17012_c0_g1	XP_015643695.1	40S ribosomal protein S24-1 [Oryza sativa Japonica Group]	Oryza_sativa	98.6	2.7e-54
TRINITY_DN17014_c0_g1	XP_017248358.1	PREDICTED: adenosine kinase 2-like [Daucus carota subsp. sativus]	Daucus_carota	91.7	4.9e-17
TRINITY_DN17023_c0_g1	XP_024381733.1	60S ribosomal protein L23 [Physcomitrella patens]	Physcomitrella_patens	87.1	7.1e-52
TRINITY_DN17026_c1_g2	RWR72599.1	Ribosomal protein L22e [Cinnamomum micranthum f. kanehirae]	Cinnamomum_micranthum	65.5	8.2e-33
TRINITY_DN17026_c1_g6	XP_015647764.1	60S ribosomal protein L22-2 [Oryza sativa Japonica Group]	Oryza_sativa	100	6.4e-65
TRINITY_DN17028_c0_g1	OTG36861.1	putative reverse transcriptase domain-containing protein [Helianthus annuus]	Helianthus_annuus	79.5	8.5e-37
TRINITY_DN17028_c0_g5	XP_017250837.1	PREDICTED: uncharacterized protein LOC108221472 [Daucus carota subsp. sativus]	Daucus_carota	87.5	4.5e-44
TRINITY_DN17028_c0_g9	XP_024965097.1	uncharacterized protein LOC112505415, partial [Cynara cardunculus var. scolymus]	Cynara_cardunculus	76.1	1.3e-35
TRINITY_DN17032_c0_g1	XP_017229714.1	PREDICTED: zinc finger BED domain-containing protein RICESLEEPER 2-like isoform X1 [Daucus carota subsp. sativus]	Daucus_carota	42.9	3.2e-23
TRINITY_DN17034_c0_g1	XP_017218148.1	PREDICTED: clavaminate synthase-like protein At3g21360 [Daucus carota subsp. sativus]	Daucus_carota	96.6	2.8e-185
TRINITY_DN17035_c0_g3	KZM87766.1	hypothetical protein DCAR_024867 [Daucus carota subsp. sativus]	Daucus_carota	87.5	1.1e-27
TRINITY_DN17036_c0_g1	AFK42829.1	unknown [Lotus japonicus]	Lotus_japonicus	49.3	5.6e-61
TRINITY_DN17039_c0_g2	XP_017250379.1	PREDICTED: hydroxyphenylpyruvate reductase-like [Daucus carota subsp. sativus]	Daucus_carota	81.2	8.8e-150
TRINITY_DN17040_c0_g1	XP_017229683.1	PREDICTED: probable receptor-like protein kinase At5g47070 [Daucus carota subsp. sativus]	Daucus_carota	87.3	2e-93
TRINITY_DN17042_c0_g3	XP_017218741.1	PREDICTED: protein SIEVE ELEMENT OCCLUSION B-like [Daucus carota subsp. sativus]	Daucus_carota	81.3	1.9e-26
TRINITY_DN17044_c0_g2	XP_017230244.1	PREDICTED: dormancy-associated protein homolog 3-like [Daucus carota subsp. sativus]	Daucus_carota	84.9	5.7e-52
TRINITY_DN17045_c0_g1	PSS01297.1	Ribosomal protein [Actinidia chinensis var. chinensis]	Actinidia_chinensis	65.9	7.9e-65
TRINITY_DN17048_c0_g2	XP_017256962.1	PREDICTED: rho GDP-dissociation inhibitor 1-like [Daucus carota subsp. sativus]	Daucus_carota	75	1.8e-93
TRINITY_DN17054_c0_g2	XP_017244028.1	PREDICTED: 28 kDa ribonucleoprotein, chloroplastic [Daucus carota subsp. sativus]	Daucus_carota	69.1	1.3e-84
TRINITY_DN17054_c0_g5	XP_017244028.1	PREDICTED: 28 kDa ribonucleoprotein, chloroplastic [Daucus carota subsp. sativus]	Daucus_carota	71.4	8.8e-06
TRINITY_DN17055_c0_g3	CAA90081.1	small GTP-binding protein [Pisum sativum]	Pisum_sativum	100	1.6e-32
TRINITY_DN17056_c0_g1	XP_017232243.1	PREDICTED: thymidine kinase a-like [Daucus carota subsp. sativus]	Daucus_carota	86.5	1.3e-107
TRINITY_DN17060_c0_g1	XP_017216335.1	PREDICTED: uncharacterized protein LOC108193979 [Daucus carota subsp. sativus]	Daucus_carota	70.7	7.5e-50
TRINITY_DN17062_c0_g1	XP_017255078.1	PREDICTED: F-box protein SKIP23-like [Daucus carota subsp. sativus]	Daucus_carota	80	3.4e-133
TRINITY_DN17062_c0_g2	XP_017255078.1	PREDICTED: F-box protein SKIP23-like [Daucus carota subsp. sativus]	Daucus_carota	77	7.3e-51
TRINITY_DN17065_c0_g1	RZB72952.1	60S ribosomal protein L32-1, partial [Glycine soja]	Glycine_soja	97.1	1.7e-68
TRINITY_DN17068_c0_g1	XP_017216155.1	PREDICTED: rhodanese-like/PpiC domain-containing protein 12, chloroplastic isoform X1 [Daucus carota subsp. sativus]	Daucus_carota	75.7	1.1e-119
TRINITY_DN17071_c0_g4	KZM95996.1	hypothetical protein DCAR_019238 [Daucus carota subsp. sativus]	Daucus_carota	70.8	1.2e-12
TRINITY_DN17072_c0_g1	XP_017235292.1	PREDICTED: clathrin interactor EPSIN 2-like isoform X1 [Daucus carota subsp. sativus]	Daucus_carota	87.1	7.6e-93
TRINITY_DN17073_c0_g1	XP_017249155.1	PREDICTED: mediator of RNA polymerase II transcription subunit 7a-like [Daucus carota subsp. sativus]	Daucus_carota	89.9	3.7e-81
TRINITY_DN17074_c0_g1	XP_017227865.1	PREDICTED: protein NUCLEAR FUSION DEFECTIVE 2 isoform X1 [Daucus carota subsp. sativus]	Daucus_carota	76.8	1.2e-67
TRINITY_DN17077_c0_g2	XP_017251906.1	PREDICTED: transcription factor bHLH84-like [Daucus carota subsp. sativus]	Daucus_carota	63	4.3e-19
TRINITY_DN17077_c1_g1	XP_017215737.1	PREDICTED: transcription factor bHLH87-like [Daucus carota subsp. sativus]	Daucus_carota	59.4	3.8e-07
TRINITY_DN17078_c0_g2	ACU20712.1	unknown [Glycine max]	Glycine_max	100	1.9e-60
TRINITY_DN17079_c0_g1	KZN09157.1	hypothetical protein DCAR_001813 [Daucus carota subsp. sativus]	Daucus_carota	97	2.1e-27
TRINITY_DN17080_c0_g1	XP_017230659.1	PREDICTED: DNA-directed RNA polymerases IV and V subunit 2-like [Daucus carota subsp. sativus]	Daucus_carota	77	0
TRINITY_DN17080_c0_g2	XP_017230659.1	PREDICTED: DNA-directed RNA polymerases IV and V subunit 2-like [Daucus carota subsp. sativus]	Daucus_carota	86.9	5.9e-126
TRINITY_DN17084_c0_g1	XP_017249607.1	PREDICTED: U1 small nuclear ribonucleoprotein 70 kDa isoform X1 [Daucus carota subsp. sativus]	Daucus_carota	59.7	4.3e-58
TRINITY_DN17084_c0_g2	XP_017249607.1	PREDICTED: U1 small nuclear ribonucleoprotein 70 kDa isoform X1 [Daucus carota subsp. sativus]	Daucus_carota	53.7	1.1e-16
TRINITY_DN17086_c1_g2	XP_015640739.1	ras-related protein RABE1c isoform X1 [Oryza sativa Japonica Group]	Oryza_sativa	100	1.4e-68
TRINITY_DN17086_c1_g3	PNY07573.1	ras-related protein RABE1c-like [Trifolium pratense]	Trifolium_pratense	96.9	1.7e-26
TRINITY_DN17095_c0_g1	XP_017258765.1	PREDICTED: WD repeat-containing protein 3 [Daucus carota subsp. sativus]	Daucus_carota	85.7	7.5e-233
TRINITY_DN17095_c0_g2	XP_017258765.1	PREDICTED: WD repeat-containing protein 3 [Daucus carota subsp. sativus]	Daucus_carota	89.9	8.7e-55
TRINITY_DN17096_c0_g1	XP_017238251.1	PREDICTED: uncharacterized protein LOC108211223 [Daucus carota subsp. sativus]	Daucus_carota	73	4.8e-91
TRINITY_DN1709_c0_g1	EEC77005.1	hypothetical protein OsI_15333 [Oryza sativa Indica Group]	Oryza_sativa	100	2.8e-31
TRINITY_DN17102_c0_g2	XP_017219994.1	PREDICTED: uncharacterized protein LOC108197031 [Daucus carota subsp. sativus]	Daucus_carota	92	4.9e-49
TRINITY_DN17102_c0_g3	KZM84311.1	hypothetical protein DCAR_028395 [Daucus carota subsp. sativus]	Daucus_carota	73.5	5.1e-85
TRINITY_DN17103_c0_g1	PKI32715.1	hypothetical protein CRG98_046889 [Punica granatum]	Punica_granatum	83.6	1.3e-75
TRINITY_DN17107_c0_g1	XP_017236314.1	PREDICTED: uncharacterized protein LOC108209747 [Daucus carota subsp. sativus]	Daucus_carota	90.6	1e-154
TRINITY_DN17107_c0_g3	PWA83692.1	U-box domain-containing protein [Artemisia annua]	Artemisia_annua	43.1	5.8e-06
TRINITY_DN17110_c0_g1	XP_017258486.1	PREDICTED: protein MICRORCHIDIA 7-like [Daucus carota subsp. sativus]	Daucus_carota	70.8	9.3e-298
TRINITY_DN17113_c0_g1	XP_017253151.1	PREDICTED: phospholipid--sterol O-acyltransferase-like isoform X1 [Daucus carota subsp. sativus]	Daucus_carota	93.8	1.5e-61
TRINITY_DN17114_c1_g1	XP_017240106.1	PREDICTED: 40S ribosomal protein S27-2 [Daucus carota subsp. sativus]	Daucus_carota	97.7	8.5e-19
TRINITY_DN17117_c0_g1	XP_008675165.1	zinc finger protein BRUTUS isoform X1 [Zea mays]	Zea_mays	58	8.1e-27
TRINITY_DN17118_c0_g1	XP_017230983.1	PREDICTED: MACPF domain-containing protein CAD1-like [Daucus carota subsp. sativus]	Daucus_carota	81.8	1.6e-39
TRINITY_DN17118_c0_g2	XP_017230983.1	PREDICTED: MACPF domain-containing protein CAD1-like [Daucus carota subsp. sativus]	Daucus_carota	89.4	1.2e-79
TRINITY_DN17119_c0_g1	ACZ06860.1	tonoplast intrinsic protein [Glycine soja]	Glycine_soja	99.6	1.3e-132
TRINITY_DN17120_c0_g1	XP_003593979.1	ISWI chromatin-remodeling complex ATPase CHR11 [Medicago truncatula]	Medicago_truncatula	91	5.5e-71
TRINITY_DN17121_c0_g1	XP_017249720.1	PREDICTED: protein IQ-DOMAIN 1 isoform X2 [Daucus carota subsp. sativus]	Daucus_carota	81.3	1.3e-158
TRINITY_DN17124_c0_g2	KRH59452.1	hypothetical protein GLYMA_05G184100 [Glycine max]	Glycine_max	100	1.2e-41
TRINITY_DN17124_c0_g3	KHN29114.1	60S ribosomal protein L6 [Glycine soja]	Glycine_soja	93	1e-46
TRINITY_DN17127_c0_g1	KZN11657.1	hypothetical protein DCAR_004313 [Daucus carota subsp. sativus]	Daucus_carota	85.3	7.9e-80
TRINITY_DN17129_c0_g1	XP_017218710.1	PREDICTED: uncharacterized protein LOC108196110 [Daucus carota subsp. sativus]	Daucus_carota	55.9	7.2e-81
TRINITY_DN17130_c0_g2	XP_017240272.1	PREDICTED: derlin-1 [Daucus carota subsp. sativus]	Daucus_carota	90.9	9.7e-123
TRINITY_DN17132_c0_g1	XP_017227241.1	PREDICTED: uncharacterized protein At1g27050 [Daucus carota subsp. sativus]	Daucus_carota	81.5	1.4e-83
TRINITY_DN17134_c0_g1	KZM95193.1	hypothetical protein DCAR_018435 [Daucus carota subsp. sativus]	Daucus_carota	91.9	1e-82
TRINITY_DN17135_c0_g1	XP_023874966.1	uncharacterized protein LOC111987475 [Quercus suber]	Quercus_suber	60.2	6.5e-22
TRINITY_DN17135_c1_g9	KZN12092.1	hypothetical protein DCAR_004748 [Daucus carota subsp. sativus]	Daucus_carota	85.7	2.2e-235
TRINITY_DN17136_c0_g1	XP_017257741.1	PREDICTED: ribokinase [Daucus carota subsp. sativus]	Daucus_carota	82.3	5.2e-166
TRINITY_DN17137_c0_g1	OMO49699.1	hypothetical protein CCACVL1_30848 [Corchorus capsularis]	Corchorus_capsularis	93	6.5e-15
TRINITY_DN17139_c0_g1	XP_017258047.1	PREDICTED: uncharacterized protein LOC108227429 [Daucus carota subsp. sativus]	Daucus_carota	72.7	1.6e-167
TRINITY_DN17140_c0_g1	XP_017257750.1	PREDICTED: sphingoid long-chain bases kinase 1-like [Daucus carota subsp. sativus]	Daucus_carota	85.4	1.3e-26
TRINITY_DN17141_c0_g1	XP_017245195.1	PREDICTED: uncharacterized protein LOC108216850 [Daucus carota subsp. sativus]	Daucus_carota	72.4	6.6e-36
TRINITY_DN17143_c0_g1	XP_017216663.1	PREDICTED: protein AUXIN-REGULATED GENE INVOLVED IN ORGAN SIZE-like [Daucus carota subsp. sativus]	Daucus_carota	74.2	4.1e-19
TRINITY_DN17144_c1_g1	XP_017218725.1	PREDICTED: flavin-containing monooxygenase FMO GS-OX-like 2 [Daucus carota subsp. sativus]	Daucus_carota	77.8	1.7e-20
TRINITY_DN17145_c1_g3	XP_017234592.1	PREDICTED: protein HESO1-like [Daucus carota subsp. sativus]	Daucus_carota	70	5.9e-161
TRINITY_DN17146_c0_g1	KZN02549.1	hypothetical protein DCAR_011303 [Daucus carota subsp. sativus]	Daucus_carota	96.5	2.2e-76
TRINITY_DN17146_c0_g5	XP_017242710.1	PREDICTED: cytochrome c1-2, heme protein, mitochondrial [Daucus carota subsp. sativus]	Daucus_carota	88	2.8e-32
TRINITY_DN17148_c0_g1	AIU48282.1	minichromosome maintenance 5 protein, partial [Buxus sinica]	Buxus_sinica	100	8.2e-09
TRINITY_DN17148_c0_g2	XP_017244285.1	PREDICTED: DNA replication licensing factor MCM5 [Daucus carota subsp. sativus]	Daucus_carota	96.2	0
TRINITY_DN17149_c0_g7	KZN10107.1	hypothetical protein DCAR_002763 [Daucus carota subsp. sativus]	Daucus_carota	50	6.1e-73
TRINITY_DN17151_c0_g1	KZM94875.1	hypothetical protein DCAR_018117 [Daucus carota subsp. sativus]	Daucus_carota	99.2	1.1e-62
TRINITY_DN17151_c0_g10	XP_023898420.1	60S ribosomal protein L15 [Quercus suber]	Quercus_suber	68.7	9.2e-49
TRINITY_DN17151_c0_g2	XP_009399011.1	PREDICTED: 60S ribosomal protein L15-1 [Musa acuminata subsp. malaccensis]	Musa_acuminata	75.5	1.6e-68
TRINITY_DN17151_c0_g3	XP_023898420.1	60S ribosomal protein L15 [Quercus suber]	Quercus_suber	77.6	2.6e-52
TRINITY_DN17151_c0_g4	NP_001235890.1	uncharacterized protein LOC100305473 [Glycine max]	Glycine_max	100	9.2e-37
TRINITY_DN17151_c0_g5	AAT85124.1	putative 60s ribosomal protein L15 [Oryza sativa Japonica Group]	Oryza_sativa	95.7	1.2e-85
TRINITY_DN17151_c0_g6	RZC31006.1	60S ribosomal protein L15, partial [Glycine soja]	Glycine_soja	100	4.4e-59
TRINITY_DN17151_c0_g7	XP_017243597.1	PREDICTED: 60S ribosomal protein L15 [Daucus carota subsp. sativus]	Daucus_carota	64.9	7.7e-69
TRINITY_DN17151_c0_g8	XP_003549922.2	60S ribosomal protein L15-1 [Glycine max]	Glycine_max	99.5	2.2e-114
TRINITY_DN17151_c0_g9	XP_009399011.1	PREDICTED: 60S ribosomal protein L15-1 [Musa acuminata subsp. malaccensis]	Musa_acuminata	77.1	1.3e-64
TRINITY_DN17153_c1_g1	XP_017217391.1	PREDICTED: uncharacterized protein LOC108194968 [Daucus carota subsp. sativus]	Daucus_carota	69.4	2.3e-28
TRINITY_DN17153_c2_g1	KZM81185.1	hypothetical protein DCAR_031246 [Daucus carota subsp. sativus]	Daucus_carota	46.4	1e-12
TRINITY_DN17153_c2_g2	XP_017239828.1	PREDICTED: uncharacterized protein LOC108212615 [Daucus carota subsp. sativus]	Daucus_carota	75	8.7e-33
TRINITY_DN17154_c0_g2	AFK48145.1	unknown [Medicago truncatula]	Medicago_truncatula	63.4	2.4e-17
TRINITY_DN17155_c0_g1	XP_017244248.1	PREDICTED: probable protein phosphatase 2C 58 [Daucus carota subsp. sativus]	Daucus_carota	94.5	7.4e-125
TRINITY_DN17158_c0_g1	XP_010268563.1	PREDICTED: armadillo repeat-containing protein 6 isoform X1 [Nelumbo nucifera]	Nelumbo_nucifera	66.7	6.4e-172
TRINITY_DN17161_c0_g6	KZM82371.1	hypothetical protein DCAR_029940 [Daucus carota subsp. sativus]	Daucus_carota	79.2	3.2e-40
TRINITY_DN17162_c0_g1	XP_017252898.1	PREDICTED: uncharacterized protein LOC108223251 [Daucus carota subsp. sativus]	Daucus_carota	67.3	6.1e-193
TRINITY_DN17163_c0_g2	ALO61913.1	NADPH cytochrome P450 oxidoreductase [Thapsia villosa var. laciniata]	Thapsia_villosa	94.2	2.4e-258
TRINITY_DN17163_c0_g4	ALO61915.1	NADPH cytochrome P450 oxidoreductase [Thapsia garganica]	Thapsia_garganica	94.1	1.1e-67
TRINITY_DN17164_c2_g3	XP_017230800.1	PREDICTED: regulatory protein NPR3 [Daucus carota subsp. sativus]	Daucus_carota	85.2	3.6e-133
TRINITY_DN17164_c2_g5	XP_017230800.1	PREDICTED: regulatory protein NPR3 [Daucus carota subsp. sativus]	Daucus_carota	75.2	2.8e-123
TRINITY_DN17165_c1_g3	CBI34455.3	unnamed protein product, partial [Vitis vinifera]	Vitis_vinifera	89.5	1.7e-142
TRINITY_DN17168_c0_g2	NP_001240945.1	ribosomal protein L11 family protein [Glycine max]	Glycine_max	100	1.6e-30
TRINITY_DN17168_c0_g3	XP_015627232.1	60S ribosomal protein L12-1 [Oryza sativa Japonica Group]	Oryza_sativa	100	1.1e-85
TRINITY_DN17170_c0_g1	XP_017216190.1	PREDICTED: peroxidase 10-like [Daucus carota subsp. sativus]	Daucus_carota	88.1	7.6e-164
TRINITY_DN17171_c0_g1	XP_017241168.1	PREDICTED: AIG2-like protein [Daucus carota subsp. sativus]	Daucus_carota	84.7	9e-80
TRINITY_DN17173_c0_g1	XP_015644708.1	seed allergenic protein RAG2 [Oryza sativa Japonica Group]	Oryza_sativa	100	9.2e-103
TRINITY_DN17173_c0_g3	XP_015646664.1	seed allergenic protein RAG2-like [Oryza sativa Japonica Group]	Oryza_sativa	100	3.8e-90
TRINITY_DN17174_c0_g1	XP_017219144.1	PREDICTED: zinc finger BED domain-containing protein RICESLEEPER 2-like isoform X1 [Daucus carota subsp. sativus]	Daucus_carota	80.8	3.5e-47
TRINITY_DN17175_c0_g1	XP_017232349.1	PREDICTED: uncharacterized protein LOC108206531 [Daucus carota subsp. sativus]	Daucus_carota	70.8	1.5e-82
TRINITY_DN17176_c0_g1	XP_017215131.1	PREDICTED: uncharacterized protein LOC108193095 [Daucus carota subsp. sativus]	Daucus_carota	54.6	8.4e-50
TRINITY_DN17178_c0_g1	XP_017218579.1	PREDICTED: flocculation protein FLO11 isoform X1 [Daucus carota subsp. sativus]	Daucus_carota	65.4	5.1e-100
TRINITY_DN17184_c0_g1	XP_002980683.1	mRNA decay activator protein ZFP36L1 [Selaginella moellendorffii]	Selaginella_moellendorffii	67.5	3.3e-09
TRINITY_DN17185_c0_g2	XP_010938730.1	PREDICTED: T-complex protein 1 subunit eta [Elaeis guineensis]	Elaeis_guineensis	72.3	2.2e-45
TRINITY_DN17186_c0_g1	XP_017221769.1	PREDICTED: MLP-like protein 34 [Daucus carota subsp. sativus]	Daucus_carota	78.2	1.9e-69
TRINITY_DN17188_c0_g1	KZN01935.1	hypothetical protein DCAR_010689 [Daucus carota subsp. sativus]	Daucus_carota	88	3.3e-91
TRINITY_DN17190_c0_g1	ABK21163.1	unknown [Picea sitchensis]	Picea_sitchensis	37.4	3.1e-12
TRINITY_DN17191_c0_g1	XP_017253796.1	PREDICTED: protein TIC 56, chloroplastic [Daucus carota subsp. sativus]	Daucus_carota	84.6	3.1e-252
TRINITY_DN17193_c0_g1	XP_017229955.1	PREDICTED: probable LRR receptor-like serine/threonine-protein kinase At1g51860 isoform X1 [Daucus carota subsp. sativus]	Daucus_carota	88.4	8.7e-179
TRINITY_DN17194_c0_g1	XP_017217695.1	PREDICTED: uncharacterized protein LOC108195253 [Daucus carota subsp. sativus]	Daucus_carota	88.8	9.7e-91
TRINITY_DN17195_c0_g1	KZN01498.1	hypothetical protein DCAR_010237 [Daucus carota subsp. sativus]	Daucus_carota	67	1.5e-52
TRINITY_DN17196_c0_g1	KZM84874.1	hypothetical protein DCAR_027704 [Daucus carota subsp. sativus]	Daucus_carota	92.3	5.7e-119
TRINITY_DN17197_c0_g1	XP_017224429.1	PREDICTED: uncharacterized protein LOC108200698 [Daucus carota subsp. sativus]	Daucus_carota	76.7	1e-120
TRINITY_DN17200_c0_g2	XP_017255664.1	PREDICTED: origin of replication complex subunit 3 isoform X1 [Daucus carota subsp. sativus]	Daucus_carota	67.2	1.4e-15
TRINITY_DN17202_c1_g2	AGB05599.1	fructose-bisphosphate aldolase 2 [Camellia oleifera]	Camellia_oleifera	76.7	1.6e-22
TRINITY_DN17204_c2_g1	XP_017229111.1	PREDICTED: RNA cytidine acetyltransferase 1-like [Daucus carota subsp. sativus]	Daucus_carota	69.1	4.9e-18
TRINITY_DN17205_c0_g1	XP_017237899.1	PREDICTED: uncharacterized protein LOC108210946 [Daucus carota subsp. sativus]	Daucus_carota	78.7	4.7e-78
TRINITY_DN17206_c0_g1	XP_017220013.1	PREDICTED: uncharacterized protein LOC108197046 [Daucus carota subsp. sativus]	Daucus_carota	77.9	3e-228
TRINITY_DN17207_c0_g1	XP_024364000.1	40S ribosomal protein S10-1-like [Physcomitrella patens]	Physcomitrella_patens	65.9	1.3e-27
TRINITY_DN17207_c0_g2	XP_013905666.1	40S ribosomal protein S10 [Monoraphidium neglectum]	Monoraphidium_neglectum	57.6	3.6e-33
TRINITY_DN17208_c0_g1	XP_009409212.1	PREDICTED: 40S ribosomal protein S15-like [Musa acuminata subsp. malaccensis]	Musa_acuminata	75.5	3.9e-58
TRINITY_DN17210_c0_g1	XP_017242520.1	PREDICTED: TMV resistance protein N-like [Daucus carota subsp. sativus]	Daucus_carota	51	9.2e-29
TRINITY_DN17214_c0_g1	XP_017255633.1	PREDICTED: transmembrane protein 256 homolog [Daucus carota subsp. sativus]	Daucus_carota	91.9	8.7e-56
TRINITY_DN17216_c0_g1	KZM92060.1	hypothetical protein DCAR_020575 [Daucus carota subsp. sativus]	Daucus_carota	95.7	1.3e-148
TRINITY_DN17216_c0_g3	XP_017215047.1	PREDICTED: DNA gyrase subunit B, chloroplastic/mitochondrial-like [Daucus carota subsp. sativus]	Daucus_carota	84.4	9.5e-190
TRINITY_DN17218_c0_g11	KZM92357.1	UDP-glycosyltransferase [Daucus carota subsp. sativus]	Daucus_carota	77.8	4.8e-14
TRINITY_DN17218_c0_g7	KZM92357.1	UDP-glycosyltransferase [Daucus carota subsp. sativus]	Daucus_carota	82.8	2.1e-32
TRINITY_DN17219_c0_g1	BAJ95967.1	predicted protein [Hordeum vulgare subsp. vulgare]	Hordeum_vulgare	78	5e-46
TRINITY_DN17219_c0_g2	BAJ95967.1	predicted protein [Hordeum vulgare subsp. vulgare]	Hordeum_vulgare	77.1	9.1e-45
TRINITY_DN17219_c0_g3	BAJ95967.1	predicted protein [Hordeum vulgare subsp. vulgare]	Hordeum_vulgare	78.4	2.8e-45
TRINITY_DN17220_c1_g1	KZN11223.1	hypothetical protein DCAR_003879 [Daucus carota subsp. sativus]	Daucus_carota	41.4	4e-32
TRINITY_DN17220_c1_g2	KZN11223.1	hypothetical protein DCAR_003879 [Daucus carota subsp. sativus]	Daucus_carota	86.9	4.9e-77
TRINITY_DN17220_c1_g3	XP_017228564.1	PREDICTED: phospholipase A1-Igamma1, chloroplastic [Daucus carota subsp. sativus]	Daucus_carota	57.4	4.7e-30
TRINITY_DN17221_c0_g2	XP_017252966.1	PREDICTED: protein transport protein Sec24-like At3g07100 [Daucus carota subsp. sativus]	Daucus_carota	86.4	0
TRINITY_DN17225_c0_g2	XP_017255180.1	PREDICTED: reticulon-like protein B16 [Daucus carota subsp. sativus]	Daucus_carota	80	4.4e-17
TRINITY_DN17226_c0_g2	XP_017256206.1	PREDICTED: DNA-directed RNA polymerases II, IV and V subunit 3-like [Daucus carota subsp. sativus]	Daucus_carota	89.1	1e-156
TRINITY_DN17226_c0_g3	XP_017214833.1	PREDICTED: plastid division protein CDP1, chloroplastic [Daucus carota subsp. sativus]	Daucus_carota	75.5	0
TRINITY_DN17227_c0_g2	XP_010230838.1	serine/arginine-rich splicing factor SR30 isoform X2 [Brachypodium distachyon]	Brachypodium_distachyon	40.4	1.3e-26
TRINITY_DN17228_c0_g1	XP_017253310.1	PREDICTED: COP9 signalosome complex subunit 6a [Daucus carota subsp. sativus]	Daucus_carota	96.4	1.2e-165
TRINITY_DN17229_c0_g1	EOY06508.1	Heat shock factor binding protein, putative [Theobroma cacao]	Theobroma_cacao	31.8	4.2e-15
TRINITY_DN17231_c0_g1	XP_017247615.1	PREDICTED: serine/threonine-protein kinase D6PK-like [Daucus carota subsp. sativus]	Daucus_carota	51.9	3.4e-31
TRINITY_DN17234_c0_g1	XP_017249133.1	PREDICTED: E3 ubiquitin-protein ligase RNF170-like [Daucus carota subsp. sativus]	Daucus_carota	84.9	3.1e-67
TRINITY_DN17235_c0_g1	KYP75076.1	hypothetical protein KK1_007774, partial [Cajanus cajan]	Cajanus_cajan	84.4	2.8e-22
TRINITY_DN17235_c0_g2	KZM90523.1	hypothetical protein DCAR_022112 [Daucus carota subsp. sativus]	Daucus_carota	58.9	4e-67
TRINITY_DN17235_c0_g4	CBI23933.3	unnamed protein product, partial [Vitis vinifera]	Vitis_vinifera	86	1.5e-20
TRINITY_DN17235_c0_g8	GAV64435.1	hypothetical protein CFOL_v3_07953, partial [Cephalotus follicularis]	Cephalotus_follicularis	60	2.4e-24
TRINITY_DN17237_c0_g1	XP_017236817.1	PREDICTED: F-box protein CPR30-like [Daucus carota subsp. sativus]	Daucus_carota	38.5	1.9e-09
TRINITY_DN17239_c0_g1	KZM88171.1	hypothetical protein DCAR_025246 [Daucus carota subsp. sativus]	Daucus_carota	93.1	6.8e-07
TRINITY_DN17242_c1_g1	XP_017223571.1	PREDICTED: GDP-mannose 3,5-epimerase 1 [Daucus carota subsp. sativus]	Daucus_carota	98.8	1.7e-42
TRINITY_DN17242_c1_g2	XP_017223571.1	PREDICTED: GDP-mannose 3,5-epimerase 1 [Daucus carota subsp. sativus]	Daucus_carota	100	2.8e-19
TRINITY_DN17243_c1_g3	XP_003552559.1	UDP-glucose 6-dehydrogenase 1 [Glycine max]	Glycine_max	99.8	5.4e-280
TRINITY_DN17243_c1_g4	ACU18255.1	unknown [Glycine max]	Glycine_max	100	1e-32
TRINITY_DN17243_c1_g5	XP_015631440.1	UDP-glucose 6-dehydrogenase 3 [Oryza sativa Japonica Group]	Oryza_sativa	100	2.1e-35
TRINITY_DN17243_c1_g6	XP_015631440.1	UDP-glucose 6-dehydrogenase 3 [Oryza sativa Japonica Group]	Oryza_sativa	100	5.1e-31
TRINITY_DN17243_c1_g7	XP_015630087.1	UDP-glucose 6-dehydrogenase 1 [Oryza sativa Japonica Group]	Oryza_sativa	100	3.5e-15
TRINITY_DN17245_c0_g1	XP_017243586.1	PREDICTED: ubiquitin carboxyl-terminal hydrolase 3 [Daucus carota subsp. sativus]	Daucus_carota	94.6	4.9e-201
TRINITY_DN17247_c0_g1	RZC22984.1	UDP-glucuronic acid decarboxylase 2 isoform B [Glycine soja]	Glycine_soja	100	7.9e-16
TRINITY_DN17248_c0_g2	XP_025879724.1	peroxisomal (S)-2-hydroxy-acid oxidase GLO1 [Oryza sativa Japonica Group]	Oryza_sativa	100	6.1e-210
TRINITY_DN17249_c0_g1	XP_015639202.1	60S ribosomal protein L18-3 [Oryza sativa Japonica Group]	Oryza_sativa	100	4.8e-99
TRINITY_DN17249_c0_g5	XP_017249646.1	PREDICTED: 60S ribosomal protein L18-2-like [Daucus carota subsp. sativus]	Daucus_carota	97.3	8.8e-97
TRINITY_DN17249_c0_g6	XP_003554636.2	60S ribosomal protein L18-2 [Glycine max]	Glycine_max	100	1.3e-29
TRINITY_DN17249_c0_g8	ACU16823.1	unknown [Glycine max]	Glycine_max	100	1.8e-31
TRINITY_DN17250_c0_g1	ASX94439.1	mitochondrial alternative oxidase 2a [Daucus carota subsp. gummifer]	Daucus_carota	78.6	6e-138
TRINITY_DN17251_c0_g2	XP_017231872.1	PREDICTED: uncharacterized protein LOC108206170 [Daucus carota subsp. sativus]	Daucus_carota	67.6	2.8e-79
TRINITY_DN17252_c0_g1	RVW29025.1	Phosphoinositide phosphatase SAC1 [Vitis vinifera]	Vitis_vinifera	89.6	7.3e-27
TRINITY_DN17253_c0_g2	RZB74263.1	Dolichyl-diphosphooligosaccharide--protein glycosyltransferase 48 kDa subunit isoform C [Glycine soja]	Glycine_soja	100	4.2e-28
TRINITY_DN17256_c0_g1	EYU37978.1	hypothetical protein MIMGU_mgv1a002825mg [Erythranthe guttata]	Erythranthe_guttata	97.9	1.3e-73
TRINITY_DN17257_c0_g1	XP_017252771.1	PREDICTED: ETO1-like protein 1 [Daucus carota subsp. sativus]	Daucus_carota	88.8	0
TRINITY_DN17259_c1_g2	XP_017219835.1	PREDICTED: RNA-binding protein 2-like [Daucus carota subsp. sativus]	Daucus_carota	72.1	7.6e-83
TRINITY_DN17259_c1_g3	XP_017232598.1	PREDICTED: U2 small nuclear ribonucleoprotein B''-like [Daucus carota subsp. sativus]	Daucus_carota	83.5	6.4e-105
TRINITY_DN17259_c1_g6	XP_017232598.1	PREDICTED: U2 small nuclear ribonucleoprotein B''-like [Daucus carota subsp. sativus]	Daucus_carota	92.2	5.3e-117
TRINITY_DN17259_c1_g7	KZN10290.1	hypothetical protein DCAR_002946 [Daucus carota subsp. sativus]	Daucus_carota	51.9	2.1e-43
TRINITY_DN17260_c0_g2	XP_017224579.1	PREDICTED: putative ribosome biogenesis protein slx9-like [Daucus carota subsp. sativus]	Daucus_carota	85	1.4e-56
TRINITY_DN17261_c0_g1	XP_017255866.1	PREDICTED: probable serine incorporator isoform X2 [Daucus carota subsp. sativus]	Daucus_carota	87.6	1.1e-89
TRINITY_DN17261_c0_g2	XP_017255866.1	PREDICTED: probable serine incorporator isoform X2 [Daucus carota subsp. sativus]	Daucus_carota	92.2	4.8e-49
TRINITY_DN17262_c2_g1	BAD82730.1	putative fructose-bisphosphate aldolase isoenzyme C-1 [Oryza sativa Japonica Group]	Oryza_sativa	100	1.2e-58
TRINITY_DN17265_c0_g1	XP_017227777.1	PREDICTED: heparanase-like protein 1 [Daucus carota subsp. sativus]	Daucus_carota	44.6	3.1e-53
TRINITY_DN17267_c0_g1	XP_017233079.1	PREDICTED: GDSL esterase/lipase At4g10955-like [Daucus carota subsp. sativus]	Daucus_carota	75.5	1e-156
TRINITY_DN17267_c0_g2	XP_017235993.1	PREDICTED: uncharacterized protein LOC108209545 isoform X1 [Daucus carota subsp. sativus]	Daucus_carota	72.1	9.2e-66
TRINITY_DN17268_c1_g1	PKA63291.1	Retrovirus-related Pol polyprotein from transposon TNT 1-94 [Apostasia shenzhenica]	Apostasia_shenzhenica	53.1	5.3e-12
TRINITY_DN17269_c0_g1	ACU14055.1	unknown [Glycine max]	Glycine_max	78.5	1.6e-59
TRINITY_DN17270_c0_g1	XP_017219618.1	PREDICTED: protein DEHYDRATION-INDUCED 19 homolog 4-like [Daucus carota subsp. sativus]	Daucus_carota	54.7	7.3e-70
TRINITY_DN17272_c0_g1	XP_017220385.1	PREDICTED: THO complex subunit 4B-like [Daucus carota subsp. sativus]	Daucus_carota	80.3	1.1e-26
TRINITY_DN17273_c0_g2	XP_017241901.1	PREDICTED: uncharacterized protein LOC108214423 isoform X1 [Daucus carota subsp. sativus]	Daucus_carota	77	2.8e-87
TRINITY_DN17275_c0_g1	XP_017223647.1	PREDICTED: DNA replication licensing factor MCM2 [Daucus carota subsp. sativus]	Daucus_carota	92.1	0
TRINITY_DN17276_c0_g1	XP_017256588.1	PREDICTED: uncharacterized protein LOC108226155 [Daucus carota subsp. sativus]	Daucus_carota	66.7	1.1e-25
TRINITY_DN17276_c0_g3	XP_017216818.1	PREDICTED: uncharacterized protein LOC108194379 [Daucus carota subsp. sativus]	Daucus_carota	62.2	1.7e-24
TRINITY_DN17276_c0_g6	XP_017239373.1	PREDICTED: uncharacterized protein LOC108212155 [Daucus carota subsp. sativus]	Daucus_carota	59.3	1.4e-19
TRINITY_DN17278_c0_g1	GAU24384.1	hypothetical protein TSUD_390930 [Trifolium subterraneum]	Trifolium_subterraneum	94.2	8.6e-39
TRINITY_DN17278_c0_g2	XP_015612809.1	60S ribosomal protein L27-3 [Oryza sativa Japonica Group]	Oryza_sativa	99.3	1.2e-69
TRINITY_DN17279_c0_g1	XP_017220769.1	PREDICTED: xylogen-like protein 11 isoform X1 [Daucus carota subsp. sativus]	Daucus_carota	62.4	1.2e-32
TRINITY_DN17280_c0_g3	XP_019231956.1	PREDICTED: heterogeneous nuclear ribonucleoprotein 1-like [Nicotiana attenuata]	Nicotiana_attenuata	41.2	1.2e-37
TRINITY_DN17280_c0_g5	XP_010264924.1	PREDICTED: heterogeneous nuclear ribonucleoprotein 1-like [Nelumbo nucifera]	Nelumbo_nucifera	39.7	6.6e-36
TRINITY_DN17281_c0_g1	XP_017245835.1	PREDICTED: myb-related protein 330-like [Daucus carota subsp. sativus]	Daucus_carota	76.3	2.9e-135
TRINITY_DN17281_c1_g2	XP_017255333.1	PREDICTED: bZIP transcription factor 53-like [Daucus carota subsp. sativus]	Daucus_carota	84.8	1.1e-07
TRINITY_DN17281_c1_g3	XP_017255334.1	PREDICTED: uncharacterized protein LOC108225042 [Daucus carota subsp. sativus]	Daucus_carota	97.4	1.7e-13
TRINITY_DN17282_c0_g8	KZM93461.1	hypothetical protein DCAR_016706 [Daucus carota subsp. sativus]	Daucus_carota	77.7	2.2e-56
TRINITY_DN17282_c0_g9	XP_018471254.1	PREDICTED: probable pectate lyase 18 [Raphanus sativus]	Raphanus_sativus	84.3	5.4e-53
TRINITY_DN17283_c0_g2	NP_001312462.1	cell division cycle protein 48 homolog [Nicotiana tabacum]	Nicotiana_tabacum	100	6.7e-34
TRINITY_DN17283_c1_g1	XP_020175970.1	cell division control protein 48 homolog E-like [Aegilops tauschii subsp. tauschii]	Aegilops_tauschii	94	2.7e-34
TRINITY_DN17283_c1_g2	XP_017226438.1	PREDICTED: probable inactive ATP-dependent zinc metalloprotease FTSHI 1, chloroplastic [Daucus carota subsp. sativus]	Daucus_carota	82.1	0
TRINITY_DN17283_c1_g3	XP_017243064.1	PREDICTED: signal recognition particle receptor subunit beta-like isoform X2 [Daucus carota subsp. sativus]	Daucus_carota	82.6	3.2e-125
TRINITY_DN17284_c0_g1	XP_017223772.1	PREDICTED: AT-hook motif nuclear-localized protein 20-like [Daucus carota subsp. sativus]	Daucus_carota	74.4	3.8e-92
TRINITY_DN17286_c0_g1	XP_017258455.1	PREDICTED: uncharacterized protein LOC108227683 [Daucus carota subsp. sativus]	Daucus_carota	79.9	7.8e-69
TRINITY_DN17290_c0_g1	CBI35134.3	unnamed protein product, partial [Vitis vinifera]	Vitis_vinifera	93.8	1.7e-35
TRINITY_DN17291_c4_g1	KZN07915.1	hypothetical protein DCAR_000584 [Daucus carota subsp. sativus]	Daucus_carota	84.4	1.5e-62
TRINITY_DN17293_c0_g1	XP_017240586.1	PREDICTED: transcription factor BEE 3-like [Daucus carota subsp. sativus]	Daucus_carota	71.7	3.3e-114
TRINITY_DN17296_c0_g1	KZM87850.1	hypothetical protein DCAR_024951 [Daucus carota subsp. sativus]	Daucus_carota	77.9	2.1e-110
TRINITY_DN17297_c0_g1	XP_017214893.1	PREDICTED: protein BASIC PENTACYSTEINE6-like [Daucus carota subsp. sativus]	Daucus_carota	83.6	1e-111
TRINITY_DN17297_c0_g6	XP_017217864.1	PREDICTED: uridine-cytidine kinase C-like isoform X1 [Daucus carota subsp. sativus]	Daucus_carota	91.2	5.3e-170
TRINITY_DN17297_c0_g7	XP_017249912.1	PREDICTED: uncharacterized protein YnbD-like isoform X1 [Daucus carota subsp. sativus]	Daucus_carota	86.8	8.4e-122
TRINITY_DN17298_c0_g1	XP_017248345.1	PREDICTED: beta-glucosidase BoGH3B-like [Daucus carota subsp. sativus]	Daucus_carota	86.8	0
TRINITY_DN17299_c0_g1	XP_017236282.1	PREDICTED: transmembrane protein 53 [Daucus carota subsp. sativus]	Daucus_carota	74.4	3.3e-58
TRINITY_DN17299_c0_g2	XP_017224384.1	PREDICTED: transmembrane protein 53-like [Daucus carota subsp. sativus]	Daucus_carota	84.6	7.4e-52
TRINITY_DN17300_c0_g1	KZM82434.1	hypothetical protein DCAR_030003 [Daucus carota subsp. sativus]	Daucus_carota	77.4	8e-117
TRINITY_DN17301_c0_g1	XP_025876278.1	LOW QUALITY PROTEIN: probable LRR receptor-like serine/threonine-protein kinase MEE39 [Oryza sativa Japonica Group]	Oryza_sativa	97.3	7.6e-36
TRINITY_DN17301_c0_g3	BAD23633.1	putative OsD305 [Oryza sativa Japonica Group]	Oryza_sativa	100	1.2e-35
TRINITY_DN17301_c1_g3	XP_017238734.1	PREDICTED: G-type lectin S-receptor-like serine/threonine-protein kinase At4g27290 [Daucus carota subsp. sativus]	Daucus_carota	75.9	6.8e-86
TRINITY_DN17303_c0_g1	NP_001236055.1	stress-induced protein H4 [Glycine max]	Glycine_max	100	2.3e-84
TRINITY_DN17304_c1_g3	XP_017228423.1	PREDICTED: uncharacterized protein LOC108203773 [Daucus carota subsp. sativus]	Daucus_carota	53.6	1.4e-20
TRINITY_DN17304_c1_g4	KZM87642.1	hypothetical protein DCAR_031921 [Daucus carota subsp. sativus]	Daucus_carota	51.3	5.1e-14
TRINITY_DN17304_c1_g5	XP_017227908.1	PREDICTED: protein NYNRIN-like [Daucus carota subsp. sativus]	Daucus_carota	49.4	3.9e-15
TRINITY_DN17305_c0_g1	XP_017229802.1	PREDICTED: uncharacterized protein LOC108204729 [Daucus carota subsp. sativus]	Daucus_carota	65.4	5.7e-132
TRINITY_DN17306_c0_g1	NP_001237785.1	ascorbate peroxidase 1, cytosolic [Glycine max]	Glycine_max	100	1.8e-142
TRINITY_DN17308_c0_g1	XP_017254873.1	PREDICTED: abscisic acid 8'-hydroxylase 4-like [Daucus carota subsp. sativus]	Daucus_carota	85.9	2e-239
TRINITY_DN17310_c1_g2	BAJ96063.1	predicted protein [Hordeum vulgare subsp. vulgare]	Hordeum_vulgare	76.4	1.1e-101
TRINITY_DN17310_c1_g4	BAJ96063.1	predicted protein [Hordeum vulgare subsp. vulgare]	Hordeum_vulgare	70.1	7.4e-26
TRINITY_DN17313_c0_g1	XP_017218272.1	PREDICTED: trihelix transcription factor ASIL1-like [Daucus carota subsp. sativus]	Daucus_carota	73.3	7.6e-117
TRINITY_DN17316_c0_g3	XP_015648298.1	60S ribosomal protein L37-1 [Oryza sativa Japonica Group]	Oryza_sativa	100	4e-48
TRINITY_DN17317_c0_g1	XP_015631418.1	40S ribosomal protein S3a [Oryza sativa Japonica Group]	Oryza_sativa	100	1.3e-143
TRINITY_DN17317_c0_g3	ACR37738.1	unknown [Zea mays]	Zea_mays	100	5.6e-43
TRINITY_DN17318_c0_g1	AAD54935.1	chitinase precursor [Petroselinum crispum]	Petroselinum_crispum	86	7.6e-139
TRINITY_DN17319_c0_g1	XP_017233318.1	PREDICTED: extensin [Daucus carota subsp. sativus]	Daucus_carota	73	1.3e-62
TRINITY_DN17320_c0_g1	BAJ89401.1	predicted protein [Hordeum vulgare subsp. vulgare]	Hordeum_vulgare	78.4	2.2e-36
TRINITY_DN17320_c0_g2	AFK49397.1	unknown [Lotus japonicus]	Lotus_japonicus	77	7.8e-38
TRINITY_DN17321_c0_g1	KZM84756.1	hypothetical protein DCAR_027822 [Daucus carota subsp. sativus]	Daucus_carota	84.5	4.7e-108
TRINITY_DN17322_c0_g2	BAJ93879.1	predicted protein [Hordeum vulgare subsp. vulgare]	Hordeum_vulgare	69	5.8e-66
TRINITY_DN17322_c0_g3	BAJ93879.1	predicted protein [Hordeum vulgare subsp. vulgare]	Hordeum_vulgare	72.3	6e-66
TRINITY_DN17323_c0_g1	XP_017216252.1	PREDICTED: uncharacterized protein LOC108193912 [Daucus carota subsp. sativus]	Daucus_carota	70.9	1.6e-52
TRINITY_DN17325_c0_g1	XP_024390255.1	40S ribosomal protein S12-like [Physcomitrella patens]	Physcomitrella_patens	58.6	2.7e-40
TRINITY_DN17326_c0_g2	XP_016511332.1	PREDICTED: uncharacterized protein LOC107828514 [Nicotiana tabacum]	Nicotiana_tabacum	50.7	2e-11
TRINITY_DN17326_c0_g3	KZM99563.1	hypothetical protein DCAR_013075 [Daucus carota subsp. sativus]	Daucus_carota	59.6	2.6e-22
TRINITY_DN17327_c0_g1	XP_017237442.1	PREDICTED: uncharacterized protein LOC108210595 [Daucus carota subsp. sativus]	Daucus_carota	61.3	2.1e-36
TRINITY_DN17328_c0_g3	XP_024971662.1	cellulose synthase A catalytic subunit 2 [UDP-forming]-like isoform X2 [Cynara cardunculus var. scolymus]	Cynara_cardunculus	89.4	3.5e-276
TRINITY_DN17333_c2_g14	XP_017238075.1	PREDICTED: protein NETWORKED 3A isoform X1 [Daucus carota subsp. sativus]	Daucus_carota	77.9	2.5e-77
TRINITY_DN17333_c2_g15	XP_017215023.1	PREDICTED: rhomboid-like protein 20 isoform X1 [Daucus carota subsp. sativus]	Daucus_carota	91.6	8.8e-147
TRINITY_DN17333_c2_g2	KZM97628.1	hypothetical protein DCAR_015010 [Daucus carota subsp. sativus]	Daucus_carota	89.1	2.1e-40
TRINITY_DN17334_c1_g1	XP_017258092.1	PREDICTED: zeatin O-glucosyltransferase-like [Daucus carota subsp. sativus]	Daucus_carota	66.7	2.4e-45
TRINITY_DN17335_c0_g2	XP_017229959.1	PREDICTED: uncharacterized protein LOC108204835 [Daucus carota subsp. sativus]	Daucus_carota	66.7	7.2e-23
TRINITY_DN17335_c0_g3	XP_017229959.1	PREDICTED: uncharacterized protein LOC108204835 [Daucus carota subsp. sativus]	Daucus_carota	68	5e-86
TRINITY_DN17335_c0_g4	XP_017229959.1	PREDICTED: uncharacterized protein LOC108204835 [Daucus carota subsp. sativus]	Daucus_carota	37.4	3.7e-37
TRINITY_DN17337_c0_g1	XP_017232278.1	PREDICTED: fasciclin-like arabinogalactan protein 4 [Daucus carota subsp. sativus]	Daucus_carota	59.7	1.7e-116
TRINITY_DN17339_c0_g1	XP_027063076.1	protein ACCELERATED CELL DEATH 6-like [Coffea arabica]	Coffea_arabica	35.8	6.9e-07
TRINITY_DN17341_c0_g1	XP_017230103.1	PREDICTED: uncharacterized protein LOC108204922 [Daucus carota subsp. sativus]	Daucus_carota	89	1.3e-116
TRINITY_DN17344_c0_g1	PSR87597.1	Ubiquitin-conjugating enzyme like [Actinidia chinensis var. chinensis]	Actinidia_chinensis	66.2	3.2e-19
TRINITY_DN17344_c0_g2	PSR87597.1	Ubiquitin-conjugating enzyme like [Actinidia chinensis var. chinensis]	Actinidia_chinensis	62.4	3.3e-26
TRINITY_DN17346_c0_g1	XP_017245969.1	PREDICTED: very-long-chain (3R)-3-hydroxyacyl-CoA dehydratase PASTICCINO 2A [Daucus carota subsp. sativus]	Daucus_carota	87.1	1e-104
TRINITY_DN17347_c0_g1	XP_003574974.1	40S ribosomal protein S27 [Brachypodium distachyon]	Brachypodium_distachyon	84.4	8.6e-32
TRINITY_DN17347_c0_g2	XP_003574974.1	40S ribosomal protein S27 [Brachypodium distachyon]	Brachypodium_distachyon	81.8	4.4e-31
TRINITY_DN17347_c0_g3	XP_003574974.1	40S ribosomal protein S27 [Brachypodium distachyon]	Brachypodium_distachyon	75.3	3.9e-27
TRINITY_DN17348_c0_g1	XP_001415408.1	P-ATPase family transporter: sodium/potassium ion [Ostreococcus lucimarinus CCE9901]	Ostreococcus_sp._'lucimarinus'	58.2	3.2e-67
TRINITY_DN17349_c2_g1	XP_024969679.1	uncharacterized protein LOC112509039 [Cynara cardunculus var. scolymus]	Cynara_cardunculus	48.8	4.6e-48
TRINITY_DN17349_c2_g2	OTG04157.1	putative ribonuclease H-like domain-containing protein [Helianthus annuus]	Helianthus_annuus	52.9	2.8e-18
TRINITY_DN17352_c0_g1	XP_017223852.1	PREDICTED: uncharacterized protein LOC108200265 [Daucus carota subsp. sativus]	Daucus_carota	62.5	2.5e-94
TRINITY_DN17353_c1_g4	XP_017215957.1	PREDICTED: serine carboxypeptidase-like 17 isoform X1 [Daucus carota subsp. sativus]	Daucus_carota	81.5	1.6e-38
TRINITY_DN17358_c0_g1	XP_017227275.1	PREDICTED: probable protein phosphatase 2C 10 [Daucus carota subsp. sativus]	Daucus_carota	88.4	1.5e-94
TRINITY_DN17361_c0_g2	XP_017258530.1	PREDICTED: zinc finger protein VAR3, chloroplastic [Daucus carota subsp. sativus]	Daucus_carota	67.6	2.2e-303
TRINITY_DN17362_c0_g1	XP_016574734.1	PREDICTED: beta-amyrin 28-oxidase-like [Capsicum annuum]	Capsicum_annuum	63.6	1.3e-174
TRINITY_DN17363_c0_g2	KZM94230.1	hypothetical protein DCAR_017473 [Daucus carota subsp. sativus]	Daucus_carota	79.9	4.2e-116
TRINITY_DN17367_c0_g1	KZN11518.1	hypothetical protein DCAR_004174 [Daucus carota subsp. sativus]	Daucus_carota	91.2	4.1e-35
TRINITY_DN17367_c1_g1	XP_017241083.1	PREDICTED: probable F-box protein At1g60180 [Daucus carota subsp. sativus]	Daucus_carota	59.9	6.9e-96
TRINITY_DN17368_c0_g2	XP_017220119.1	PREDICTED: probable methyltransferase At1g27930 [Daucus carota subsp. sativus]	Daucus_carota	84.1	2.3e-140
TRINITY_DN17368_c0_g3	XP_017220119.1	PREDICTED: probable methyltransferase At1g27930 [Daucus carota subsp. sativus]	Daucus_carota	69.7	1.2e-23
TRINITY_DN17370_c0_g1	KZN11489.1	hypothetical protein DCAR_004145 [Daucus carota subsp. sativus]	Daucus_carota	75	2.1e-33
TRINITY_DN17373_c0_g1	XP_017224313.1	PREDICTED: GATA transcription factor 16 [Daucus carota subsp. sativus]	Daucus_carota	78.5	3.3e-20
TRINITY_DN17374_c0_g4	XP_017239425.1	PREDICTED: uncharacterized protein LOC108212210 [Daucus carota subsp. sativus]	Daucus_carota	72.1	3.6e-24
TRINITY_DN17374_c0_g8	KZN05500.1	hypothetical protein DCAR_006337 [Daucus carota subsp. sativus]	Daucus_carota	94.5	2.3e-49
TRINITY_DN17375_c0_g3	XP_017243572.1	PREDICTED: transcription elongation factor B polypeptide 3-like [Daucus carota subsp. sativus]	Daucus_carota	61.5	6.1e-75
TRINITY_DN17376_c0_g1	XP_017216256.1	PREDICTED: endonuclease 2 [Daucus carota subsp. sativus]	Daucus_carota	86.4	4.1e-144
TRINITY_DN17376_c0_g3	XP_017216257.1	PREDICTED: acyl-acyl carrier protein thioesterase ATL3, chloroplastic-like isoform X1 [Daucus carota subsp. sativus]	Daucus_carota	79.2	2.6e-88
TRINITY_DN17380_c0_g1	XP_017236639.1	PREDICTED: probable nucleolar protein 5-2 [Daucus carota subsp. sativus]	Daucus_carota	95.7	6.3e-94
TRINITY_DN17380_c0_g3	XP_015630760.1	probable nucleolar protein 5-2 [Oryza sativa Japonica Group]	Oryza_sativa	100	1e-55
TRINITY_DN17380_c1_g1	XP_017247026.1	PREDICTED: exosome complex component RRP45A-like [Daucus carota subsp. sativus]	Daucus_carota	78.4	1.3e-141
TRINITY_DN17383_c0_g1	XP_017250010.1	PREDICTED: BTB/POZ domain-containing protein At1g55760-like [Daucus carota subsp. sativus]	Daucus_carota	90.1	1.9e-170
TRINITY_DN17385_c0_g1	KZM88192.1	hypothetical protein DCAR_025267 [Daucus carota subsp. sativus]	Daucus_carota	96	3.8e-65
TRINITY_DN17387_c0_g1	XP_017245206.1	PREDICTED: uncharacterized protein LOC108216862 [Daucus carota subsp. sativus]	Daucus_carota	83.4	6e-60
TRINITY_DN17388_c0_g1	XP_017236815.1	PREDICTED: germin-like protein subfamily 3 member 2 [Daucus carota subsp. sativus]	Daucus_carota	78.9	3.1e-89
TRINITY_DN17389_c0_g1	KZM87600.1	hypothetical protein DCAR_024720 [Daucus carota subsp. sativus]	Daucus_carota	96.9	3.8e-26
TRINITY_DN17389_c0_g4	KZM86050.1	hypothetical protein DCAR_026528 [Daucus carota subsp. sativus]	Daucus_carota	83.6	1.6e-21
TRINITY_DN17390_c0_g1	XP_017246596.1	PREDICTED: citrate-binding protein-like [Daucus carota subsp. sativus]	Daucus_carota	84.2	1.7e-108
TRINITY_DN17391_c0_g1	XP_017241421.1	PREDICTED: serine carboxypeptidase-like 12 [Daucus carota subsp. sativus]	Daucus_carota	74.7	1.9e-210
TRINITY_DN17392_c0_g1	XP_017232097.1	PREDICTED: uncharacterized protein At2g34160-like [Daucus carota subsp. sativus]	Daucus_carota	95.5	2e-59
TRINITY_DN17392_c1_g4	XP_017232097.1	PREDICTED: uncharacterized protein At2g34160-like [Daucus carota subsp. sativus]	Daucus_carota	93.3	8.5e-37
TRINITY_DN17393_c0_g2	KZM89178.1	hypothetical protein DCAR_026253 [Daucus carota subsp. sativus]	Daucus_carota	97.7	4.6e-68
TRINITY_DN17393_c1_g1	XP_017219717.1	PREDICTED: pyruvate dehydrogenase E1 component subunit beta-1, mitochondrial [Daucus carota subsp. sativus]	Daucus_carota	93.2	2.4e-39
TRINITY_DN17394_c0_g1	AGZ15402.1	ubiquitin conjugating enzyme/ubiquitin-like activating enzyme [Phaseolus vulgaris]	Phaseolus_vulgaris	93	3.1e-82
TRINITY_DN17398_c0_g3	XP_017231706.1	PREDICTED: rhomboid-like protein 19 [Daucus carota subsp. sativus]	Daucus_carota	67.7	5.5e-135
TRINITY_DN17399_c0_g1	XP_017254490.1	PREDICTED: uncharacterized protein LOC108224399 [Daucus carota subsp. sativus]	Daucus_carota	70.2	1.7e-97
TRINITY_DN17400_c0_g1	KZM86610.1	hypothetical protein DCAR_023744 [Daucus carota subsp. sativus]	Daucus_carota	70.6	2.4e-31
TRINITY_DN17402_c0_g1	XP_017234412.1	PREDICTED: CLAVATA3/ESR (CLE)-related protein 25 [Daucus carota subsp. sativus]	Daucus_carota	53.3	8.4e-13
TRINITY_DN17402_c1_g1	KZM88765.1	hypothetical protein DCAR_025840 [Daucus carota subsp. sativus]	Daucus_carota	62.5	5.9e-91
TRINITY_DN17402_c1_g2	KZM99856.1	hypothetical protein DCAR_012782 [Daucus carota subsp. sativus]	Daucus_carota	80.2	1.5e-44
TRINITY_DN17402_c1_g3	XP_017241478.1	PREDICTED: protein LIGHT-DEPENDENT SHORT HYPOCOTYLS 4-like [Daucus carota subsp. sativus]	Daucus_carota	80.6	3.7e-90
TRINITY_DN17403_c0_g1	KZM83363.1	hypothetical protein DCAR_030932 [Daucus carota subsp. sativus]	Daucus_carota	51.3	7.7e-23
TRINITY_DN17404_c0_g1	KZM85139.1	hypothetical protein DCAR_027439 [Daucus carota subsp. sativus]	Daucus_carota	93.4	1.4e-142
TRINITY_DN17405_c0_g1	ACN31553.1	unknown [Zea mays]	Zea_mays	95.6	2.1e-94
TRINITY_DN17405_c0_g2	ACN31553.1	unknown [Zea mays]	Zea_mays	80.1	1.5e-73
TRINITY_DN17406_c0_g3	XP_017217506.1	PREDICTED: protein BIG GRAIN 1-like B [Daucus carota subsp. sativus]	Daucus_carota	52.7	5.7e-97
TRINITY_DN17409_c0_g1	XP_017248062.1	PREDICTED: ankyrin repeat and zinc finger domain-containing protein 1 [Daucus carota subsp. sativus]	Daucus_carota	75.8	2.2e-228
TRINITY_DN17410_c1_g4	XP_017243460.1	PREDICTED: GPI mannosyltransferase 2 [Daucus carota subsp. sativus]	Daucus_carota	75.7	2.3e-216
TRINITY_DN17411_c0_g1	XP_017241513.1	PREDICTED: probable cadmium/zinc-transporting ATPase HMA1, chloroplastic [Daucus carota subsp. sativus]	Daucus_carota	92.7	0
TRINITY_DN17411_c0_g2	XP_017241513.1	PREDICTED: probable cadmium/zinc-transporting ATPase HMA1, chloroplastic [Daucus carota subsp. sativus]	Daucus_carota	68.4	2.6e-48
TRINITY_DN17412_c0_g3	OTG02696.1	putative ubiquitin-conjugating enzyme/RWD-like protein [Helianthus annuus]	Helianthus_annuus	71.2	1.2e-20
TRINITY_DN17412_c0_g4	AAY29571.1	immature spike ubiquitin-conjugating enzyme 2 [Triticum aestivum]	Triticum_aestivum	98.8	7.2e-40
TRINITY_DN17412_c0_g7	OMO60429.1	hypothetical protein CCACVL1_24163 [Corchorus capsularis]	Corchorus_capsularis	55.9	4e-12
TRINITY_DN17414_c0_g1	XP_017255473.1	PREDICTED: frataxin, mitochondrial-like [Daucus carota subsp. sativus]	Daucus_carota	87.5	4.2e-53
TRINITY_DN17414_c0_g2	XP_017238636.1	PREDICTED: frataxin, mitochondrial-like [Daucus carota subsp. sativus]	Daucus_carota	86.2	1.5e-56
TRINITY_DN17415_c0_g1	XP_017247685.1	PREDICTED: calcium-transporting ATPase 10, plasma membrane-type-like isoform X1 [Daucus carota subsp. sativus]	Daucus_carota	84.4	1.2e-51
TRINITY_DN17415_c0_g2	KZM97961.1	hypothetical protein DCAR_014677 [Daucus carota subsp. sativus]	Daucus_carota	83.3	2.3e-47
TRINITY_DN17417_c0_g1	XP_017216682.1	PREDICTED: lipid phosphate phosphatase 2-like isoform X1 [Daucus carota subsp. sativus]	Daucus_carota	89.2	1.4e-92
TRINITY_DN17418_c0_g1	XP_017230759.1	PREDICTED: 50S ribosomal protein L3-2, chloroplastic [Daucus carota subsp. sativus]	Daucus_carota	94.4	1.9e-52
TRINITY_DN17419_c0_g1	XP_018626204.1	PREDICTED: uncharacterized protein LOC104095884 [Nicotiana tomentosiformis]	Nicotiana_tomentosiformis	91.6	4e-33
TRINITY_DN17419_c1_g3	XP_017219324.1	PREDICTED: G-box-binding factor 1-like isoform X2 [Daucus carota subsp. sativus]	Daucus_carota	77.6	6.3e-96
TRINITY_DN17421_c0_g1	XP_017234751.1	PREDICTED: putative threonine aspartase isoform X1 [Daucus carota subsp. sativus]	Daucus_carota	52.5	1.5e-107
TRINITY_DN17421_c0_g2	XP_017234751.1	PREDICTED: putative threonine aspartase isoform X1 [Daucus carota subsp. sativus]	Daucus_carota	87.6	3.3e-43
TRINITY_DN17422_c1_g1	RDX71344.1	40S ribosomal protein S14, partial [Mucuna pruriens]	Mucuna_pruriens	99.1	3.3e-52
TRINITY_DN17422_c1_g3	ABS44863.1	putative ribosomal protein S14 [Oryza sativa Japonica Group]	Oryza_sativa	88.7	1.1e-69
TRINITY_DN17422_c1_g5	ABS44863.1	putative ribosomal protein S14 [Oryza sativa Japonica Group]	Oryza_sativa	88	1.5e-64
TRINITY_DN17423_c0_g1	XP_017247889.1	PREDICTED: uncharacterized protein LOC108219114 isoform X2 [Daucus carota subsp. sativus]	Daucus_carota	54.5	1.9e-275
TRINITY_DN17424_c0_g1	XP_017258923.1	PREDICTED: serine/threonine protein phosphatase 2A 57 kDa regulatory subunit B' theta isoform-like [Daucus carota subsp. sativus]	Daucus_carota	88.5	2.8e-253
TRINITY_DN17426_c0_g1	XP_017231242.1	PREDICTED: ruvB-like protein 1 [Daucus carota subsp. sativus]	Daucus_carota	98	2.9e-246
TRINITY_DN17427_c0_g1	KZN03528.1	hypothetical protein DCAR_012284 [Daucus carota subsp. sativus]	Daucus_carota	89.2	5.8e-131
TRINITY_DN17428_c0_g1	KZN02819.1	hypothetical protein DCAR_011575 [Daucus carota subsp. sativus]	Daucus_carota	79	1.2e-39
TRINITY_DN17428_c0_g2	KZN02819.1	hypothetical protein DCAR_011575 [Daucus carota subsp. sativus]	Daucus_carota	51.1	4.9e-53
TRINITY_DN17429_c1_g2	XP_017223145.1	PREDICTED: mitochondrial-processing peptidase subunit alpha-like [Daucus carota subsp. sativus]	Daucus_carota	78.4	2.2e-132
TRINITY_DN17430_c0_g3	XP_017216604.1	PREDICTED: uncharacterized protein LOC108194196 [Daucus carota subsp. sativus]	Daucus_carota	69.3	2.1e-58
TRINITY_DN17430_c0_g5	XP_017228283.1	PREDICTED: E3 ubiquitin-protein ligase SGR9, amyloplastic-like [Daucus carota subsp. sativus]	Daucus_carota	71.5	4.2e-107
TRINITY_DN17430_c0_g6	XP_017215613.1	PREDICTED: uncharacterized protein LOC108193463 [Daucus carota subsp. sativus]	Daucus_carota	73.7	1.5e-60
TRINITY_DN17433_c0_g1	XP_017240345.1	PREDICTED: metallophosphoesterase 1-like [Daucus carota subsp. sativus]	Daucus_carota	71.8	5.1e-153
TRINITY_DN17434_c0_g1	XP_010049536.1	PREDICTED: 40S ribosomal protein S3-3 [Eucalyptus grandis]	Eucalyptus_grandis	84	4.8e-98
TRINITY_DN17435_c0_g1	XP_017234903.1	PREDICTED: putative tRNA (cytidine(34)-2'-O)-methyltransferase isoform X1 [Daucus carota subsp. sativus]	Daucus_carota	82.9	1.2e-114
TRINITY_DN17437_c0_g3	XP_017226679.1	PREDICTED: glutamate--glyoxylate aminotransferase 2-like [Daucus carota subsp. sativus]	Daucus_carota	96.9	8.5e-276
TRINITY_DN17441_c0_g1	KZN05621.1	hypothetical protein DCAR_006458 [Daucus carota subsp. sativus]	Daucus_carota	58.7	1.6e-44
TRINITY_DN17447_c0_g1	XP_017221315.1	PREDICTED: uncharacterized protein LOC108198044 [Daucus carota subsp. sativus]	Daucus_carota	57.7	6.2e-25
TRINITY_DN17448_c2_g1	XP_017223975.1	PREDICTED: auxin-induced protein X15-like [Daucus carota subsp. sativus]	Daucus_carota	65	7.9e-20
TRINITY_DN17448_c2_g4	XP_017241878.1	PREDICTED: CRM-domain containing factor CFM3, chloroplastic/mitochondrial [Daucus carota subsp. sativus]	Daucus_carota	61.6	3.8e-36
TRINITY_DN17449_c0_g3	XP_017249868.1	PREDICTED: calcineurin subunit B-like [Daucus carota subsp. sativus]	Daucus_carota	96.6	1.9e-90
TRINITY_DN17449_c0_g4	OTG32570.1	putative myb/SANT-like domain, Harbinger transposase-derived nuclease domain protein [Helianthus annuus]	Helianthus_annuus	41.8	9e-71
TRINITY_DN17449_c0_g5	KZM84708.1	hypothetical protein DCAR_027870 [Daucus carota subsp. sativus]	Daucus_carota	85.3	1.6e-24
TRINITY_DN1744_c0_g1	YP_009545090.1	NADH-plastoquinone oxidoreductase subunit 2 (chloroplast) [Gymnomitrion concinnatum]	Gymnomitrion_concinnatum	28.1	2.9e-10
TRINITY_DN17450_c1_g1	XP_017256389.1	PREDICTED: uncharacterized protein LOC108225949 [Daucus carota subsp. sativus]	Daucus_carota	60.8	4.2e-21
TRINITY_DN17450_c1_g2	XP_017256389.1	PREDICTED: uncharacterized protein LOC108225949 [Daucus carota subsp. sativus]	Daucus_carota	61	4.7e-15
TRINITY_DN17451_c3_g1	XP_017258714.1	PREDICTED: 14-3-3-like protein B [Daucus carota subsp. sativus]	Daucus_carota	90	3.6e-123
TRINITY_DN17451_c3_g2	XP_017230039.1	PREDICTED: 14-3-3-like protein [Daucus carota subsp. sativus]	Daucus_carota	96.2	1.3e-90
TRINITY_DN17451_c3_g3	XP_015616773.1	transcriptional corepressor SEUSS [Oryza sativa Japonica Group]	Oryza_sativa	100	7.8e-18
TRINITY_DN17451_c3_g5	AAX77224.2	14-3-3 protein [Dunaliella salina]	Dunaliella_salina	86.2	5e-31
TRINITY_DN17452_c1_g3	XP_017215043.1	PREDICTED: catalase-like [Daucus carota subsp. sativus]	Daucus_carota	95.5	4.1e-292
TRINITY_DN17453_c0_g2	XP_017243491.1	PREDICTED: RHOMBOID-like protein 3 [Daucus carota subsp. sativus]	Daucus_carota	72.3	1.1e-111
TRINITY_DN17454_c0_g2	XP_017239543.1	PREDICTED: CASP-like protein 4D1 [Daucus carota subsp. sativus]	Daucus_carota	52.8	2e-11
TRINITY_DN17454_c1_g2	XP_017218617.1	PREDICTED: EID1-like F-box protein 2 [Daucus carota subsp. sativus]	Daucus_carota	92.3	3.2e-140
TRINITY_DN17454_c1_g7	XP_017237313.1	PREDICTED: EID1-like F-box protein 2 [Daucus carota subsp. sativus]	Daucus_carota	91.9	3.8e-139
TRINITY_DN17455_c0_g1	XP_017228255.1	PREDICTED: uncharacterized protein LOC108203695, partial [Daucus carota subsp. sativus]	Daucus_carota	61.6	1.2e-24
TRINITY_DN17455_c1_g1	XP_017227908.1	PREDICTED: protein NYNRIN-like [Daucus carota subsp. sativus]	Daucus_carota	71.8	3.8e-46
TRINITY_DN17455_c1_g9	XP_017227830.1	PREDICTED: uncharacterized protein K02A2.6-like [Daucus carota subsp. sativus]	Daucus_carota	65.1	2.1e-34
TRINITY_DN17457_c2_g1	XP_017240557.1	PREDICTED: polyadenylate-binding protein 8-like [Daucus carota subsp. sativus]	Daucus_carota	74.8	1.7e-273
TRINITY_DN17457_c2_g2	XP_027117248.1	uncharacterized protein LOC113734775 [Coffea arabica]	Coffea_arabica	58.9	1.4e-34
TRINITY_DN17458_c1_g2	KZM88456.1	hypothetical protein DCAR_025531 [Daucus carota subsp. sativus]	Daucus_carota	77.5	3.5e-65
TRINITY_DN17458_c1_g3	XP_017238294.1	PREDICTED: uncharacterized protein LOC108211256 [Daucus carota subsp. sativus]	Daucus_carota	46.9	2.8e-43
TRINITY_DN17459_c0_g1	KZN09107.1	hypothetical protein DCAR_001763 [Daucus carota subsp. sativus]	Daucus_carota	98	3.7e-57
TRINITY_DN17461_c0_g1	PHT97282.1	Protein TAR1 [Capsicum chinense]	Capsicum_chinense	46.9	4.3e-21
TRINITY_DN17461_c0_g2	PHT25112.1	hypothetical protein CQW23_35246 [Capsicum baccatum]	Capsicum_baccatum	55.3	1.7e-11
TRINITY_DN17462_c0_g1	XP_017224047.1	PREDICTED: UDP-glycosyltransferase 89A2-like [Daucus carota subsp. sativus]	Daucus_carota	70.8	2.3e-194
TRINITY_DN17463_c0_g1	XP_023772360.1	pentatricopeptide repeat-containing protein At2g36240 [Lactuca sativa]	Lactuca_sativa	60.8	3.8e-17
TRINITY_DN17464_c0_g1	XP_017255050.1	PREDICTED: UPF0183 protein At3g51130 [Daucus carota subsp. sativus]	Daucus_carota	94.4	3.7e-231
TRINITY_DN17466_c0_g1	XP_017236756.1	PREDICTED: mediator of RNA polymerase II transcription subunit 6 [Daucus carota subsp. sativus]	Daucus_carota	87.4	2.2e-70
TRINITY_DN17467_c0_g1	XP_017244637.1	PREDICTED: protein DCL, chloroplastic [Daucus carota subsp. sativus]	Daucus_carota	76.5	2.6e-80
TRINITY_DN17468_c0_g1	XP_017229113.1	PREDICTED: anther-specific proline-rich protein APG-like [Daucus carota subsp. sativus]	Daucus_carota	72.3	2.1e-27
TRINITY_DN17468_c0_g2	XP_017229113.1	PREDICTED: anther-specific proline-rich protein APG-like [Daucus carota subsp. sativus]	Daucus_carota	85.7	5.9e-34
TRINITY_DN17468_c0_g3	XP_017229113.1	PREDICTED: anther-specific proline-rich protein APG-like [Daucus carota subsp. sativus]	Daucus_carota	77.8	2.6e-17
TRINITY_DN17469_c0_g2	XP_017233107.1	PREDICTED: uncharacterized protein LOC108207157 [Daucus carota subsp. sativus]	Daucus_carota	90.2	8.1e-06
TRINITY_DN17473_c0_g1	XP_017220477.1	PREDICTED: uncharacterized protein LOC108197382 [Daucus carota subsp. sativus]	Daucus_carota	46.1	6.5e-53
TRINITY_DN17474_c0_g1	NP_001242792.1	uncharacterized protein LOC100779492 [Glycine max]	Glycine_max	100	3e-44
TRINITY_DN17475_c0_g1	XP_017229837.1	PREDICTED: lysine-specific demethylase JMJ25 [Daucus carota subsp. sativus]	Daucus_carota	77	0
TRINITY_DN17476_c0_g1	XP_017231413.1	PREDICTED: pentatricopeptide repeat-containing protein At2g20710, mitochondrial-like [Daucus carota subsp. sativus]	Daucus_carota	54.4	4.8e-110
TRINITY_DN17477_c0_g1	XP_017256840.1	PREDICTED: uroporphyrinogen decarboxylase 1, chloroplastic [Daucus carota subsp. sativus]	Daucus_carota	90	3.2e-212
TRINITY_DN17480_c0_g2	XP_007139681.1	hypothetical protein PHAVU_008G050000g [Phaseolus vulgaris]	Phaseolus_vulgaris	100	7.5e-12
TRINITY_DN17480_c0_g5	KZM89820.1	hypothetical protein DCAR_022817 [Daucus carota subsp. sativus]	Daucus_carota	98.6	1.7e-117
TRINITY_DN17480_c0_g7	KCW64139.1	hypothetical protein EUGRSUZ_G01788 [Eucalyptus grandis]	Eucalyptus_grandis	100	2.1e-74
TRINITY_DN17481_c0_g1	EXC10888.1	hypothetical protein L484_002552 [Morus notabilis]	Morus_notabilis	74.7	1.1e-54
TRINITY_DN17483_c1_g2	KZM84895.1	hypothetical protein DCAR_027683 [Daucus carota subsp. sativus]	Daucus_carota	57.9	7.1e-10
TRINITY_DN17483_c2_g1	XP_017243909.1	PREDICTED: uncharacterized protein LOC108215832 [Daucus carota subsp. sativus]	Daucus_carota	64.3	4e-76
TRINITY_DN17483_c2_g6	XP_017243909.1	PREDICTED: uncharacterized protein LOC108215832 [Daucus carota subsp. sativus]	Daucus_carota	80.6	1.1e-95
TRINITY_DN17483_c2_g8	KZN06728.1	hypothetical protein DCAR_007565 [Daucus carota subsp. sativus]	Daucus_carota	84.7	1.2e-26
TRINITY_DN17485_c0_g1	XP_006649862.1	PREDICTED: probable histone H2A.5 [Oryza brachyantha]	Oryza_brachyantha	100	2.9e-59
TRINITY_DN17486_c0_g1	XP_017227358.1	PREDICTED: uncharacterized protein LOC108203120 [Daucus carota subsp. sativus]	Daucus_carota	83.7	4.6e-247
TRINITY_DN17488_c0_g1	XP_017228151.1	PREDICTED: stress-response A/B barrel domain-containing protein UP3-like [Daucus carota subsp. sativus]	Daucus_carota	69.4	8.3e-89
TRINITY_DN17491_c0_g6	XP_017223628.1	PREDICTED: inorganic phosphate transporter 2-1, chloroplastic [Daucus carota subsp. sativus]	Daucus_carota	92.5	2.8e-36
TRINITY_DN17492_c0_g1	XP_017259108.1	PREDICTED: cyclin-L1-1 [Daucus carota subsp. sativus]	Daucus_carota	89.8	7.1e-180
TRINITY_DN17494_c2_g3	KZM84401.1	hypothetical protein DCAR_028177 [Daucus carota subsp. sativus]	Daucus_carota	69.3	6.8e-24
TRINITY_DN17496_c0_g1	XP_015962106.1	trafficking protein particle complex subunit 2-like protein [Arachis duranensis]	Arachis_duranensis	90.2	5e-66
TRINITY_DN17497_c0_g1	AAS83469.1	cycloartenol synthase [Bupleurum kaoi]	Bupleurum_kaoi	85.6	2.6e-44
TRINITY_DN17498_c0_g1	XP_016740570.1	PREDICTED: 60S ribosomal protein L13-1-like [Gossypium hirsutum]	Gossypium_hirsutum	55.3	4.1e-27
TRINITY_DN17498_c0_g2	XP_002962809.1	60S ribosomal protein L13-1 isoform X2 [Selaginella moellendorffii]	Selaginella_moellendorffii	67.8	1e-51
TRINITY_DN17498_c0_g3	XP_002962809.1	60S ribosomal protein L13-1 isoform X2 [Selaginella moellendorffii]	Selaginella_moellendorffii	58.1	4.1e-55
TRINITY_DN17500_c0_g1	KZM91398.1	hypothetical protein DCAR_021237 [Daucus carota subsp. sativus]	Daucus_carota	90	2.7e-54
TRINITY_DN17502_c0_g1	XP_017229957.1	PREDICTED: 30-kDa cleavage and polyadenylation specificity factor 30-like [Daucus carota subsp. sativus]	Daucus_carota	78.9	1.8e-284
TRINITY_DN17502_c0_g5	XP_017252253.1	PREDICTED: elongation factor 2 [Daucus carota subsp. sativus]	Daucus_carota	98.4	3.1e-298
TRINITY_DN17505_c0_g1	XP_017238252.1	PREDICTED: uncharacterized protein C9orf85 homolog [Daucus carota subsp. sativus]	Daucus_carota	71.9	7.4e-13
TRINITY_DN17506_c0_g1	XP_017230327.1	PREDICTED: uncharacterized protein LOC108205065 isoform X1 [Daucus carota subsp. sativus]	Daucus_carota	90	4.3e-121
TRINITY_DN17507_c0_g1	XP_017234450.1	PREDICTED: uncharacterized protein LOC108208426 [Daucus carota subsp. sativus]	Daucus_carota	87.3	5e-91
TRINITY_DN17508_c0_g1	XP_017259056.1	PREDICTED: protein STICHEL-like [Daucus carota subsp. sativus]	Daucus_carota	76.1	3.3e-179
TRINITY_DN17508_c1_g1	NP_001241052.1	uncharacterized protein LOC100798104 [Glycine max]	Glycine_max	70.3	4.5e-55
TRINITY_DN17509_c0_g1	XP_017216420.1	PREDICTED: protein BIG GRAIN 1-like B [Daucus carota subsp. sativus]	Daucus_carota	63	1.5e-107
TRINITY_DN17510_c0_g1	KXG35979.1	hypothetical protein SORBI_3002G258800 [Sorghum bicolor]	Sorghum_bicolor	94.9	1.9e-139
TRINITY_DN17512_c0_g1	XP_017237251.1	PREDICTED: protein FIZZY-RELATED 3 [Daucus carota subsp. sativus]	Daucus_carota	90.5	1.3e-264
TRINITY_DN17514_c0_g4	KHM99788.1	T-complex protein 1 subunit gamma [Glycine soja]	Glycine_soja	98.7	6.6e-35
TRINITY_DN17514_c0_g5	XP_017219358.1	PREDICTED: T-complex protein 1 subunit gamma [Daucus carota subsp. sativus]	Daucus_carota	97.4	3.8e-103
TRINITY_DN17515_c1_g1	XP_017241914.1	PREDICTED: phosphoinositide phospholipase C 2-like [Daucus carota subsp. sativus]	Daucus_carota	94.7	2.3e-25
TRINITY_DN17517_c0_g1	XP_017249347.1	PREDICTED: delta(12)-fatty-acid desaturase FAD2-like [Daucus carota subsp. sativus]	Daucus_carota	53.6	2.4e-120
TRINITY_DN17518_c0_g1	XP_017258175.1	PREDICTED: sm-like protein LSM1B [Daucus carota subsp. sativus]	Daucus_carota	98.7	7.8e-36
TRINITY_DN17518_c0_g2	XP_017244153.1	PREDICTED: F-box protein GID2 [Daucus carota subsp. sativus]	Daucus_carota	67	2.2e-58
TRINITY_DN17520_c0_g1	KHN15386.1	60S ribosomal protein L30 [Glycine soja]	Glycine_soja	99.1	3.2e-58
TRINITY_DN17521_c1_g1	XP_017216669.1	PREDICTED: transcription factor TCP20-like [Daucus carota subsp. sativus]	Daucus_carota	80.1	4.5e-109
TRINITY_DN17521_c2_g1	XP_017244525.1	PREDICTED: putative serine/threonine-protein kinase isoform X1 [Daucus carota subsp. sativus]	Daucus_carota	78.4	1.2e-104
TRINITY_DN17523_c0_g2	XP_017233167.1	PREDICTED: uncharacterized protein LOC108207215, partial [Daucus carota subsp. sativus]	Daucus_carota	75.9	1e-26
TRINITY_DN17524_c0_g2	XP_017218438.1	PREDICTED: denticleless protein homolog [Daucus carota subsp. sativus]	Daucus_carota	90	1.3e-06
TRINITY_DN17525_c0_g1	BAF24202.2	Os08g0524600, partial [Oryza sativa Japonica Group]	Oryza_sativa	99.3	5e-71
TRINITY_DN17525_c0_g4	XP_017227477.1	PREDICTED: 60S ribosomal protein L32-1 [Daucus carota subsp. sativus]	Daucus_carota	100	3e-15
TRINITY_DN17527_c0_g1	ABR21728.1	calmodulin [Actinidia deliciosa var. chlorocarpa]	Actinidia_deliciosa	37.4	4.5e-21
TRINITY_DN17527_c0_g4	BAJ94652.1	predicted protein [Hordeum vulgare subsp. vulgare]	Hordeum_vulgare	90.1	1.4e-38
TRINITY_DN17527_c0_g8	XP_023891019.1	guanine nucleotide-binding protein subunit beta-like [Quercus suber]	Quercus_suber	75	1.3e-24
TRINITY_DN17528_c0_g1	KMS64936.1	hypothetical protein BVRB_041110, partial [Beta vulgaris subsp. vulgaris]	Beta_vulgaris	76.4	4.6e-22
TRINITY_DN17528_c0_g2	KMS64936.1	hypothetical protein BVRB_041110, partial [Beta vulgaris subsp. vulgaris]	Beta_vulgaris	77.8	1.1e-10
TRINITY_DN17529_c0_g1	XP_017253639.1	PREDICTED: protein YLS7-like [Daucus carota subsp. sativus]	Daucus_carota	56.9	4.3e-227
TRINITY_DN17529_c0_g3	XP_017249406.1	PREDICTED: 65-kDa microtubule-associated protein 3-like isoform X1 [Daucus carota subsp. sativus]	Daucus_carota	80.6	2.1e-191
TRINITY_DN17529_c0_g6	XP_017227941.1	PREDICTED: uncharacterized protein LOC108192682 [Daucus carota subsp. sativus]	Daucus_carota	68.1	3.2e-37
TRINITY_DN17530_c0_g1	EAZ00722.1	hypothetical protein OsI_22747 [Oryza sativa Indica Group]	Oryza_sativa	99.1	1.9e-52
TRINITY_DN17530_c1_g1	NP_001237204.1	uncharacterized protein LOC100306335 [Glycine max]	Glycine_max	65	7.8e-32
TRINITY_DN17530_c1_g2	XP_023872785.1	60S ribosomal protein L31-B-like [Quercus suber]	Quercus_suber	68.7	1.3e-18
TRINITY_DN17530_c2_g1	RCV40670.1	hypothetical protein SETIT_9G073900v2 [Setaria italica]	Setaria_italica	96.8	1.5e-30
TRINITY_DN17533_c0_g1	XP_017258816.1	PREDICTED: 60S ribosomal protein L7a-1 [Daucus carota subsp. sativus]	Daucus_carota	96.5	1e-135
TRINITY_DN17534_c0_g1	XP_017232345.1	PREDICTED: OPA3-like protein [Daucus carota subsp. sativus]	Daucus_carota	84.8	6.3e-61
TRINITY_DN17536_c0_g2	XP_017241313.1	PREDICTED: golgin subfamily A member 4 [Daucus carota subsp. sativus]	Daucus_carota	83.6	3.5e-140
TRINITY_DN17537_c0_g5	XP_015614255.1	cell division control protein 48 homolog E [Oryza sativa Japonica Group]	Oryza_sativa	100	1.1e-34
TRINITY_DN17538_c0_g2	PON95002.1	hypothetical protein TorRG33x02_092010 [Trema orientale]	Trema_orientale	68.1	1.4e-37
TRINITY_DN17540_c0_g1	XP_017216560.1	PREDICTED: probable DNA primase large subunit [Daucus carota subsp. sativus]	Daucus_carota	90.7	1.5e-240
TRINITY_DN17541_c0_g1	XP_017238712.1	PREDICTED: heptahelical transmembrane protein 1-like [Daucus carota subsp. sativus]	Daucus_carota	85.7	5.1e-98
TRINITY_DN17541_c1_g1	KZM90078.1	hypothetical protein DCAR_022557 [Daucus carota subsp. sativus]	Daucus_carota	66.1	9.5e-104
TRINITY_DN17541_c1_g2	XP_017254588.1	PREDICTED: polyadenylate-binding protein-interacting protein 4 [Daucus carota subsp. sativus]	Daucus_carota	62.6	1.2e-60
TRINITY_DN17541_c2_g1	XP_017255319.1	PREDICTED: beta-amyrin 28-oxidase [Daucus carota subsp. sativus]	Daucus_carota	87.5	9.5e-255
TRINITY_DN17541_c2_g2	XP_017253396.1	PREDICTED: uncharacterized protein LOC108223586 [Daucus carota subsp. sativus]	Daucus_carota	88.3	9.6e-206
TRINITY_DN17542_c0_g1	XP_017243279.1	PREDICTED: charged multivesicular body protein 7 isoform X1 [Daucus carota subsp. sativus]	Daucus_carota	77.4	2.8e-180
TRINITY_DN17543_c0_g3	RXH69369.1	hypothetical protein DVH24_037153 [Malus domestica]	Malus_domestica	45.3	2.5e-12
TRINITY_DN17544_c0_g1	XP_017216729.1	PREDICTED: uncharacterized protein LOC108194289 [Daucus carota subsp. sativus]	Daucus_carota	92.9	5.2e-59
TRINITY_DN17545_c0_g1	XP_017219054.1	PREDICTED: uncharacterized protein LOC108196330 [Daucus carota subsp. sativus]	Daucus_carota	83.4	0
TRINITY_DN17546_c0_g1	XP_017227216.1	PREDICTED: probable inactive purple acid phosphatase 29 isoform X3 [Daucus carota subsp. sativus]	Daucus_carota	80.2	1.6e-177
TRINITY_DN17547_c0_g1	XP_017216894.1	PREDICTED: TIMELESS-interacting protein [Daucus carota subsp. sativus]	Daucus_carota	71.9	1.1e-112
TRINITY_DN17548_c0_g2	KZM94646.1	hypothetical protein DCAR_017889 [Daucus carota subsp. sativus]	Daucus_carota	73.6	4.7e-38
TRINITY_DN17548_c0_g3	XP_017249955.1	PREDICTED: type I inositol polyphosphate 5-phosphatase 8-like isoform X1 [Daucus carota subsp. sativus]	Daucus_carota	80	1.5e-155
TRINITY_DN17549_c0_g1	XP_017228044.1	PREDICTED: 3-oxo-Delta(4,5)-steroid 5-beta-reductase-like [Daucus carota subsp. sativus]	Daucus_carota	84	1.1e-152
TRINITY_DN17549_c0_g2	AFW16645.1	putative progesterone 5beta-reductase [Bupleurum falcatum]	Bupleurum_falcatum	99.7	6.8e-239
TRINITY_DN1754_c0_g1	XP_015646609.1	phospholipase D alpha 1 [Oryza sativa Japonica Group]	Oryza_sativa	100	1.5e-33
TRINITY_DN17550_c0_g1	XP_017255530.1	PREDICTED: uncharacterized protein LOC108225215 [Daucus carota subsp. sativus]	Daucus_carota	64.2	9.4e-42
TRINITY_DN17551_c0_g1	KRH17780.1	hypothetical protein GLYMA_13G015300 [Glycine max]	Glycine_max	69	1.2e-24
TRINITY_DN17552_c0_g1	XP_017242262.1	PREDICTED: transcription factor UNE12-like [Daucus carota subsp. sativus]	Daucus_carota	67	7.3e-58
TRINITY_DN17554_c0_g1	XP_017219606.1	PREDICTED: BTB/POZ and TAZ domain-containing protein 4 [Daucus carota subsp. sativus]	Daucus_carota	72.8	1.6e-162
TRINITY_DN17555_c0_g12	XP_012075839.2	uncharacterized protein LOC105637051 [Jatropha curcas]	Jatropha_curcas	84.6	3.4e-13
TRINITY_DN17557_c1_g2	XP_017231306.1	PREDICTED: BTB/POZ domain-containing protein At5g41330-like isoform X1 [Daucus carota subsp. sativus]	Daucus_carota	87.5	8.3e-161
TRINITY_DN17558_c0_g1	XP_017245974.1	PREDICTED: peptide-N4-(N-acetyl-beta-glucosaminyl)asparagine amidase A-like isoform X1 [Daucus carota subsp. sativus]	Daucus_carota	77.2	6.7e-275
TRINITY_DN17559_c1_g1	KZV15252.1	hypothetical protein F511_26398 [Dorcoceras hygrometricum]	Dorcoceras_hygrometricum	60.7	4.2e-25
TRINITY_DN17560_c1_g2	XP_017239744.1	PREDICTED: uncharacterized protein LOC108212530 [Daucus carota subsp. sativus]	Daucus_carota	47.6	2.4e-09
TRINITY_DN17561_c3_g1	XP_015958005.1	uncharacterized protein LOC107482124 [Arachis duranensis]	Arachis_duranensis	71	3.5e-29
TRINITY_DN17562_c0_g2	XP_017245407.1	PREDICTED: beta-hexosaminidase 2-like [Daucus carota subsp. sativus]	Daucus_carota	95.7	1.3e-21
TRINITY_DN17563_c0_g1	XP_017226548.1	PREDICTED: E3 ubiquitin-protein ligase RNF12 [Daucus carota subsp. sativus]	Daucus_carota	57	1.5e-212
TRINITY_DN17564_c0_g2	XP_017247912.1	PREDICTED: enoyl-CoA hydratase 2, peroxisomal-like [Daucus carota subsp. sativus]	Daucus_carota	82.2	3.7e-144
TRINITY_DN17564_c0_g8	XP_017256601.1	PREDICTED: uncharacterized protein LOC108226171 [Daucus carota subsp. sativus]	Daucus_carota	62.6	6.9e-29
TRINITY_DN17567_c1_g1	XP_017258369.1	PREDICTED: uncharacterized protein LOC108227634 isoform X1 [Daucus carota subsp. sativus]	Daucus_carota	69.3	1.4e-39
TRINITY_DN17567_c1_g2	XP_017238204.1	PREDICTED: GRF1-interacting factor 2-like [Daucus carota subsp. sativus]	Daucus_carota	66.8	1.9e-24
TRINITY_DN17570_c0_g2	KZN05540.1	hypothetical protein DCAR_006377 [Daucus carota subsp. sativus]	Daucus_carota	87.2	1.7e-193
TRINITY_DN17572_c0_g1	KZN11803.1	hypothetical protein DCAR_004459 [Daucus carota subsp. sativus]	Daucus_carota	92.6	7.6e-44
TRINITY_DN17574_c0_g2	XP_017215188.1	PREDICTED: malonyl-CoA decarboxylase, mitochondrial [Daucus carota subsp. sativus]	Daucus_carota	77.9	3e-218
TRINITY_DN17575_c0_g11	XP_017250982.1	PREDICTED: rapid alkalinization factor-like [Daucus carota subsp. sativus]	Daucus_carota	78.3	3.3e-39
TRINITY_DN17575_c0_g7	KJB24360.1	hypothetical protein B456_004G142200 [Gossypium raimondii]	Gossypium_raimondii	43.4	3.6e-21
TRINITY_DN17576_c0_g1	XP_017235769.1	PREDICTED: casein kinase 1-like protein 6 isoform X2 [Daucus carota subsp. sativus]	Daucus_carota	76.2	6.6e-61
TRINITY_DN17577_c0_g3	XP_017227544.1	PREDICTED: uncharacterized protein LOC108203269 [Daucus carota subsp. sativus]	Daucus_carota	72.1	2.3e-23
TRINITY_DN17577_c0_g6	OTG22666.1	putative protein kinase-like domain-containing protein [Helianthus annuus]	Helianthus_annuus	50	6.7e-19
TRINITY_DN17578_c1_g1	XP_021971466.1	uncharacterized protein LOC110866631 [Helianthus annuus]	Helianthus_annuus	54.9	8.1e-11
TRINITY_DN17578_c1_g3	XP_017245674.1	PREDICTED: uncharacterized protein LOC108217350 [Daucus carota subsp. sativus]	Daucus_carota	75.3	4.5e-23
TRINITY_DN17578_c1_g6	XP_022019352.1	uncharacterized protein LOC110919389 [Helianthus annuus]	Helianthus_annuus	70.9	4.2e-38
TRINITY_DN17579_c0_g1	RRT84823.1	hypothetical protein B296_00013212 [Ensete ventricosum]	Ensete_ventricosum	98.6	2.6e-38
TRINITY_DN17582_c0_g1	XP_017246135.1	PREDICTED: RING-H2 finger protein ATL54-like [Daucus carota subsp. sativus]	Daucus_carota	53.6	4.2e-92
TRINITY_DN17583_c0_g1	XP_017236159.1	PREDICTED: trigger factor isoform X1 [Daucus carota subsp. sativus]	Daucus_carota	75.5	2.3e-56
TRINITY_DN17585_c0_g1	XP_024395960.1	60S ribosomal protein L27-like [Physcomitrella patens]	Physcomitrella_patens	60.5	2.1e-33
TRINITY_DN17585_c0_g2	XP_010667820.1	PREDICTED: 60S ribosomal protein L27-3 [Beta vulgaris subsp. vulgaris]	Beta_vulgaris	59.5	1.5e-37
TRINITY_DN17588_c0_g1	XP_017220284.1	PREDICTED: 3-dehydrosphinganine reductase TSC10A [Daucus carota subsp. sativus]	Daucus_carota	84.3	7e-147
TRINITY_DN17589_c1_g1	XP_017235090.1	PREDICTED: protein SUPPRESSOR OF K(+) TRANSPORT GROWTH DEFECT 1-like [Daucus carota subsp. sativus]	Daucus_carota	97.4	9.4e-143
TRINITY_DN17589_c1_g2	XP_017241988.1	PREDICTED: protein SUPPRESSOR OF K(+) TRANSPORT GROWTH DEFECT 1 [Daucus carota subsp. sativus]	Daucus_carota	94.7	3.7e-175
TRINITY_DN17590_c0_g1	XP_017244727.1	PREDICTED: osmotin-like protein [Daucus carota subsp. sativus]	Daucus_carota	81.3	4.4e-119
TRINITY_DN17591_c1_g1	XP_017244110.1	PREDICTED: uncharacterized protein LOC108215977 [Daucus carota subsp. sativus]	Daucus_carota	88.1	5.1e-131
TRINITY_DN17592_c1_g5	KVI00069.1	Ribosomal protein L1 [Cynara cardunculus var. scolymus]	Cynara_cardunculus	90.9	6.3e-38
TRINITY_DN17594_c0_g1	XP_017235966.1	PREDICTED: homeobox-leucine zipper protein ATHB-15 [Daucus carota subsp. sativus]	Daucus_carota	92.2	0
TRINITY_DN17595_c0_g1	XP_017248973.1	PREDICTED: uncharacterized protein LOC108219900 [Daucus carota subsp. sativus]	Daucus_carota	71.3	1.2e-155
TRINITY_DN17596_c3_g4	KZN08419.1	hypothetical protein DCAR_000965 [Daucus carota subsp. sativus]	Daucus_carota	91.5	5.1e-61
TRINITY_DN17598_c1_g1	XP_017247225.1	PREDICTED: lysine-specific demethylase JMJ25-like [Daucus carota subsp. sativus]	Daucus_carota	88.6	6.5e-67
TRINITY_DN17598_c2_g3	XP_017256024.1	PREDICTED: uncharacterized protein LOC108225609 [Daucus carota subsp. sativus]	Daucus_carota	91.1	5e-56
TRINITY_DN17600_c0_g1	XP_024363053.1	nascent polypeptide-associated complex subunit alpha-like protein 1 [Physcomitrella patens]	Physcomitrella_patens	61	3.8e-34
TRINITY_DN17602_c1_g1	KZN03943.1	hypothetical protein DCAR_012699 [Daucus carota subsp. sativus]	Daucus_carota	77.2	3.5e-26
TRINITY_DN17602_c1_g3	KZN03943.1	hypothetical protein DCAR_012699 [Daucus carota subsp. sativus]	Daucus_carota	73	5.2e-31
TRINITY_DN17602_c1_g4	KZN03943.1	hypothetical protein DCAR_012699 [Daucus carota subsp. sativus]	Daucus_carota	73.4	1.3e-25
TRINITY_DN17603_c1_g1	XP_017257729.1	PREDICTED: serine/threonine-protein kinase minibrain [Daucus carota subsp. sativus]	Daucus_carota	92.7	2.3e-100
TRINITY_DN17603_c2_g1	XP_017242331.1	PREDICTED: IMPACT family member in pol 5'region isoform X2 [Daucus carota subsp. sativus]	Daucus_carota	82.7	5.8e-88
TRINITY_DN17604_c2_g4	XP_017238399.1	PREDICTED: signal recognition particle 9 kDa protein [Daucus carota subsp. sativus]	Daucus_carota	95.1	1.1e-50
TRINITY_DN17604_c2_g5	XP_017222518.1	PREDICTED: phosphatidylinositol 4-kinase gamma 7-like [Daucus carota subsp. sativus]	Daucus_carota	86.8	2.8e-10
TRINITY_DN17604_c2_g7	XP_017238399.1	PREDICTED: signal recognition particle 9 kDa protein [Daucus carota subsp. sativus]	Daucus_carota	93.2	1.1e-49
TRINITY_DN17607_c0_g3	XP_017256885.1	PREDICTED: protein CLP1 homolog isoform X1 [Daucus carota subsp. sativus]	Daucus_carota	94	9.7e-230
TRINITY_DN17609_c0_g11	KZN06727.1	hypothetical protein DCAR_007564 [Daucus carota subsp. sativus]	Daucus_carota	84.7	5.7e-141
TRINITY_DN17609_c0_g5	XP_017254234.1	PREDICTED: probable zinc metallopeptidase EGY3, chloroplastic [Daucus carota subsp. sativus]	Daucus_carota	83.2	2.9e-253
TRINITY_DN17609_c0_g6	KZN06727.1	hypothetical protein DCAR_007564 [Daucus carota subsp. sativus]	Daucus_carota	88	1.3e-150
TRINITY_DN17609_c0_g9	XP_017215433.1	PREDICTED: probable pyridoxal 5'-phosphate synthase subunit PDX1 [Daucus carota subsp. sativus]	Daucus_carota	96	6.7e-35
TRINITY_DN17611_c0_g2	XP_017237352.1	PREDICTED: serine/threonine-protein kinase MHK [Daucus carota subsp. sativus]	Daucus_carota	82.5	5.6e-225
TRINITY_DN17612_c0_g2	XP_017250042.1	PREDICTED: probable cysteine protease RD19D [Daucus carota subsp. sativus]	Daucus_carota	87.5	6.7e-129
TRINITY_DN17613_c1_g4	XP_017238133.1	PREDICTED: peroxiredoxin Q, chloroplastic-like [Daucus carota subsp. sativus]	Daucus_carota	79	2.3e-91
TRINITY_DN17615_c0_g2	XP_017216100.1	PREDICTED: autophagy-related protein 101 [Daucus carota subsp. sativus]	Daucus_carota	96.3	3.2e-69
TRINITY_DN17615_c0_g8	XP_017236805.1	PREDICTED: RING-H2 finger protein ATL7-like isoform X2 [Daucus carota subsp. sativus]	Daucus_carota	81.4	8e-90
TRINITY_DN17615_c0_g9	XP_017235762.1	PREDICTED: histone H1-like [Daucus carota subsp. sativus]	Daucus_carota	72	1.3e-27
TRINITY_DN17616_c0_g3	CBI19672.3	unnamed protein product, partial [Vitis vinifera]	Vitis_vinifera	97.4	7.5e-82
TRINITY_DN17616_c0_g5	XP_017219552.1	PREDICTED: eukaryotic peptide chain release factor subunit 1-3 [Daucus carota subsp. sativus]	Daucus_carota	96.1	2e-241
TRINITY_DN17618_c0_g1	XP_017252519.1	PREDICTED: putative GTP diphosphokinase RSH1, chloroplastic isoform X1 [Daucus carota subsp. sativus]	Daucus_carota	91.7	0
TRINITY_DN17618_c0_g2	XP_017252519.1	PREDICTED: putative GTP diphosphokinase RSH1, chloroplastic isoform X1 [Daucus carota subsp. sativus]	Daucus_carota	84	8.7e-105
TRINITY_DN17619_c0_g3	XP_017248443.1	PREDICTED: pollen-specific protein C13 [Daucus carota subsp. sativus]	Daucus_carota	79.6	3e-43
TRINITY_DN17619_c0_g4	XP_017242675.1	PREDICTED: E3 ubiquitin-protein ligase RGLG2-like [Daucus carota subsp. sativus]	Daucus_carota	72	2.5e-65
TRINITY_DN17620_c0_g2	XP_017246736.1	PREDICTED: putative ribosomal-protein-alanine acetyltransferase [Daucus carota subsp. sativus]	Daucus_carota	80.4	3.3e-67
TRINITY_DN17624_c1_g2	AAC41680.1	protein kinase p34cdc2 [Petroselinum crispum]	Petroselinum_crispum	92.2	2.1e-159
TRINITY_DN17624_c1_g4	XP_017224397.1	PREDICTED: cell division control protein 2 homolog A-like [Daucus carota subsp. sativus]	Daucus_carota	91.2	8.6e-158
TRINITY_DN17627_c1_g1	XP_017223305.1	PREDICTED: PHD finger protein ALFIN-LIKE 1-like [Daucus carota subsp. sativus]	Daucus_carota	88.4	4e-15
TRINITY_DN17627_c1_g2	XP_017223305.1	PREDICTED: PHD finger protein ALFIN-LIKE 1-like [Daucus carota subsp. sativus]	Daucus_carota	89.2	3.2e-93
TRINITY_DN17627_c1_g3	XP_017218797.1	PREDICTED: PHD finger protein ALFIN-LIKE 4-like [Daucus carota subsp. sativus]	Daucus_carota	84.5	8.9e-100
TRINITY_DN17627_c1_g6	XP_017246152.1	PREDICTED: uncharacterized protein LOC108217777 [Daucus carota subsp. sativus]	Daucus_carota	93.2	2.8e-178
TRINITY_DN17627_c1_g7	XP_017220356.1	PREDICTED: PHD finger protein ALFIN-LIKE 2-like [Daucus carota subsp. sativus]	Daucus_carota	90.4	4.1e-128
TRINITY_DN17628_c0_g3	PLY96215.1	hypothetical protein LSAT_3X117680 [Lactuca sativa]	Lactuca_sativa	87.8	9.7e-66
TRINITY_DN17630_c1_g2	XP_017220364.1	PREDICTED: uncharacterized protein LOC108197297 [Daucus carota subsp. sativus]	Daucus_carota	73.3	7.5e-22
TRINITY_DN17630_c1_g4	XP_017222019.1	PREDICTED: zinc finger protein 5 [Daucus carota subsp. sativus]	Daucus_carota	66.2	1.2e-72
TRINITY_DN17630_c1_g5	XP_017222019.1	PREDICTED: zinc finger protein 5 [Daucus carota subsp. sativus]	Daucus_carota	73.9	4.6e-83
TRINITY_DN17632_c0_g1	XP_017254024.1	PREDICTED: ubiquinol-cytochrome-c reductase complex assembly factor 1 [Daucus carota subsp. sativus]	Daucus_carota	79.5	1.4e-129
TRINITY_DN17632_c0_g2	XP_017243403.1	PREDICTED: stress-response A/B barrel domain-containing protein At5g22580 [Daucus carota subsp. sativus]	Daucus_carota	83.7	4.8e-44
TRINITY_DN17633_c0_g1	XP_017248056.1	PREDICTED: protein NUCLEAR FUSION DEFECTIVE 6, chloroplastic/mitochondrial-like isoform X2 [Daucus carota subsp. sativus]	Daucus_carota	78.7	1.3e-28
TRINITY_DN17633_c0_g3	XP_017248056.1	PREDICTED: protein NUCLEAR FUSION DEFECTIVE 6, chloroplastic/mitochondrial-like isoform X2 [Daucus carota subsp. sativus]	Daucus_carota	70.2	3.1e-22
TRINITY_DN17634_c0_g10	KZN05863.1	hypothetical protein DCAR_006700 [Daucus carota subsp. sativus]	Daucus_carota	83.5	4.4e-36
TRINITY_DN17634_c0_g2	XP_017225151.1	PREDICTED: wall-associated receptor kinase-like 10 [Daucus carota subsp. sativus]	Daucus_carota	91.6	1.1e-40
TRINITY_DN17641_c1_g1	XP_017215590.1	PREDICTED: ADP-ribosylation factor-like protein 5 [Daucus carota subsp. sativus]	Daucus_carota	96.9	8.2e-68
TRINITY_DN17641_c1_g3	XP_017223605.1	PREDICTED: ADP-ribosylation factor-like protein 5 [Daucus carota subsp. sativus]	Daucus_carota	99.1	1.6e-61
TRINITY_DN17641_c2_g4	XP_017253222.1	PREDICTED: putative disease resistance protein RGA3 [Daucus carota subsp. sativus]	Daucus_carota	72.1	0
TRINITY_DN17642_c0_g1	XP_017243299.1	PREDICTED: uncharacterized protein LOC108215348 [Daucus carota subsp. sativus]	Daucus_carota	43	2.3e-25
TRINITY_DN17644_c3_g2	XP_017249567.1	PREDICTED: uncharacterized protein LOC108220339 [Daucus carota subsp. sativus]	Daucus_carota	71.5	4.1e-69
TRINITY_DN17645_c0_g5	XP_017228418.1	PREDICTED: uncharacterized protein LOC108192715 [Daucus carota subsp. sativus]	Daucus_carota	87.6	1.6e-91
TRINITY_DN17645_c0_g7	XP_017228418.1	PREDICTED: uncharacterized protein LOC108192715 [Daucus carota subsp. sativus]	Daucus_carota	81	6.9e-88
TRINITY_DN17645_c0_g9	XP_017228418.1	PREDICTED: uncharacterized protein LOC108192715 [Daucus carota subsp. sativus]	Daucus_carota	81.9	2.3e-83
TRINITY_DN17646_c0_g2	XP_017251848.1	PREDICTED: uncharacterized protein LOC108222439 [Daucus carota subsp. sativus]	Daucus_carota	71.4	8.4e-70
TRINITY_DN17647_c0_g1	XP_017250373.1	PREDICTED: dynein light chain LC6, flagellar outer arm [Daucus carota subsp. sativus]	Daucus_carota	91.9	1.5e-47
TRINITY_DN17647_c0_g3	KZN08041.1	hypothetical protein DCAR_000710 [Daucus carota subsp. sativus]	Daucus_carota	53.7	2e-19
TRINITY_DN17648_c0_g1	XP_017229746.1	PREDICTED: ubiquitin carboxyl-terminal hydrolase 24-like [Daucus carota subsp. sativus]	Daucus_carota	76.6	5.7e-218
TRINITY_DN17649_c0_g1	XP_017244151.1	PREDICTED: uncharacterized membrane protein At3g27390-like [Daucus carota subsp. sativus]	Daucus_carota	85.7	6.5e-289
TRINITY_DN17650_c0_g1	KZM98435.1	hypothetical protein DCAR_014203 [Daucus carota subsp. sativus]	Daucus_carota	75.6	1.3e-12
TRINITY_DN17650_c1_g1	XP_017223361.1	PREDICTED: alpha-xylosidase 1-like [Daucus carota subsp. sativus]	Daucus_carota	87.1	0
TRINITY_DN17650_c1_g4	XP_017236363.1	PREDICTED: alpha-xylosidase 1-like [Daucus carota subsp. sativus]	Daucus_carota	85.4	2e-152
TRINITY_DN17651_c0_g1	XP_017245958.1	PREDICTED: uncharacterized protein At1g04910-like [Daucus carota subsp. sativus]	Daucus_carota	71.8	3.8e-34
TRINITY_DN17653_c0_g1	KZM85330.1	hypothetical protein DCAR_027248 [Daucus carota subsp. sativus]	Daucus_carota	88.5	7.4e-25
TRINITY_DN17654_c0_g1	XP_017254394.1	PREDICTED: 17.4 kDa class III heat shock protein [Daucus carota subsp. sativus]	Daucus_carota	76.3	1.1e-57
TRINITY_DN17660_c0_g2	CAN65406.1	hypothetical protein VITISV_030853 [Vitis vinifera]	Vitis_vinifera	75.6	1.9e-11
TRINITY_DN17663_c1_g10	ANA12002.1	cyclophilin [Panax ginseng]	Panax_ginseng	89	2e-87
TRINITY_DN17663_c1_g3	KZN10040.1	hypothetical protein DCAR_002696 [Daucus carota subsp. sativus]	Daucus_carota	73.7	9.3e-121
TRINITY_DN17663_c1_g4	XP_018450932.1	PREDICTED: peptidyl-prolyl cis-trans isomerase CYP18-3 [Raphanus sativus]	Raphanus_sativus	80.6	3.8e-23
TRINITY_DN17665_c1_g1	XP_012462140.1	PREDICTED: 40S ribosomal protein S16-like [Gossypium raimondii]	Gossypium_raimondii	74	8e-59
TRINITY_DN17668_c0_g2	XP_017242126.1	PREDICTED: protein LONGIFOLIA 1-like isoform X2 [Daucus carota subsp. sativus]	Daucus_carota	58.2	8.6e-286
TRINITY_DN17669_c0_g5	XP_017248873.1	PREDICTED: early nodulin-like protein 2 [Daucus carota subsp. sativus]	Daucus_carota	75.5	7.4e-55
TRINITY_DN17671_c1_g1	XP_017226171.1	PREDICTED: protein MOR1 [Daucus carota subsp. sativus]	Daucus_carota	93.4	0
TRINITY_DN17672_c1_g1	XP_017220215.1	PREDICTED: protein HHL1, chloroplastic [Daucus carota subsp. sativus]	Daucus_carota	79.3	4.7e-101
TRINITY_DN17673_c0_g3	XP_017236103.1	PREDICTED: glyoxylate/hydroxypyruvate reductase HPR3-like [Daucus carota subsp. sativus]	Daucus_carota	74.9	6.6e-132
TRINITY_DN17673_c0_g5	XP_017236108.1	PREDICTED: expansin-A18-like [Daucus carota subsp. sativus]	Daucus_carota	92.3	1.7e-32
TRINITY_DN17675_c2_g1	XP_017218682.1	PREDICTED: BTB/POZ and MATH domain-containing protein 3-like isoform X2 [Daucus carota subsp. sativus]	Daucus_carota	84.8	6e-165
TRINITY_DN17675_c2_g4	XP_017227106.1	PREDICTED: myb family transcription factor APL-like [Daucus carota subsp. sativus]	Daucus_carota	87.2	6.4e-49
TRINITY_DN17676_c0_g2	RZB68500.1	Polyadenylate-binding protein-interacting protein 7 isoform B [Glycine soja]	Glycine_soja	100	6.7e-32
TRINITY_DN17676_c1_g1	ESR66196.1	hypothetical protein CICLE_v10007851mg [Citrus clementina]	Citrus_clementina	89.1	2.4e-14
TRINITY_DN17677_c0_g1	XP_017253033.1	PREDICTED: probable Xaa-Pro aminopeptidase P [Daucus carota subsp. sativus]	Daucus_carota	90.8	0
TRINITY_DN17679_c4_g1	XP_017246204.1	PREDICTED: uncharacterized protein LOC108217826 isoform X1 [Daucus carota subsp. sativus]	Daucus_carota	58.5	1.4e-31
TRINITY_DN17684_c0_g2	XP_017249620.1	PREDICTED: 60S ribosomal protein L24-like [Daucus carota subsp. sativus]	Daucus_carota	94.3	4.6e-66
TRINITY_DN17685_c0_g1	XP_017239054.1	PREDICTED: peamaclein [Daucus carota subsp. sativus]	Daucus_carota	93.3	4.2e-31
TRINITY_DN17685_c0_g2	XP_017249698.1	PREDICTED: uncharacterized protein LOC108220436 [Daucus carota subsp. sativus]	Daucus_carota	78.4	5.8e-45
TRINITY_DN17685_c0_g5	EOX91334.1	Uncharacterized protein TCM_000563 [Theobroma cacao]	Theobroma_cacao	51	1.6e-06
TRINITY_DN17685_c0_g7	XP_017234489.1	PREDICTED: high affinity nitrate transporter 2.4-like [Daucus carota subsp. sativus]	Daucus_carota	96.7	2.2e-78
TRINITY_DN17688_c0_g1	XP_017228512.1	PREDICTED: reticuline oxidase-like [Daucus carota subsp. sativus]	Daucus_carota	74	1.7e-93
TRINITY_DN17688_c0_g2	XP_017228512.1	PREDICTED: reticuline oxidase-like [Daucus carota subsp. sativus]	Daucus_carota	74.3	1.5e-135
TRINITY_DN17692_c2_g1	XP_017216241.1	PREDICTED: nuclear ribonuclease Z [Daucus carota subsp. sativus]	Daucus_carota	78.9	9.1e-126
TRINITY_DN17693_c0_g1	XP_017215631.1	PREDICTED: protein TIC 20-I, chloroplastic [Daucus carota subsp. sativus]	Daucus_carota	82.4	4.4e-129
TRINITY_DN17694_c0_g1	EAY94718.1	hypothetical protein OsI_16495 [Oryza sativa Indica Group]	Oryza_sativa	99.5	1.1e-238
TRINITY_DN17694_c0_g2	ONM16274.1	S-adenosylmethionine decarboxylase proenzyme S-adenosylmethionine decarboxylase alpha chain S-adenosylmethionine decarboxylase beta chain [Zea mays]	Zea_mays	100	1.2e-46
TRINITY_DN17695_c1_g1	XP_017225512.1	PREDICTED: uncharacterized protein LOC108201737 [Daucus carota subsp. sativus]	Daucus_carota	82.2	1.3e-28
TRINITY_DN17695_c2_g5	XP_010668020.1	PREDICTED: uncharacterized protein LOC104885003 [Beta vulgaris subsp. vulgaris]	Beta_vulgaris	95.2	4.1e-67
TRINITY_DN17697_c1_g1	XP_017243685.1	PREDICTED: ribosome maturation protein SBDS-like [Daucus carota subsp. sativus]	Daucus_carota	87	1.7e-123
TRINITY_DN17697_c1_g4	XP_022034755.1	ribosome maturation protein SBDS [Helianthus annuus]	Helianthus_annuus	94.3	1.9e-48
TRINITY_DN17698_c0_g1	XP_017226764.1	PREDICTED: uncharacterized protein LOC108202746 [Daucus carota subsp. sativus]	Daucus_carota	62.4	1.3e-34
TRINITY_DN17699_c0_g2	XP_017239908.1	PREDICTED: protection of telomeres protein 1b-like isoform X1 [Daucus carota subsp. sativus]	Daucus_carota	70.1	2.7e-193
TRINITY_DN17700_c0_g1	XP_017222931.1	PREDICTED: uncharacterized protein LOC108199566 [Daucus carota subsp. sativus]	Daucus_carota	92.2	5.6e-187
TRINITY_DN17701_c0_g1	XP_017222322.1	PREDICTED: uncharacterized protein LOC108199078 [Daucus carota subsp. sativus]	Daucus_carota	76.9	2.1e-19
TRINITY_DN17701_c1_g5	XP_017221973.1	PREDICTED: uncharacterized protein LOC108198708 [Daucus carota subsp. sativus]	Daucus_carota	75	5.8e-20
TRINITY_DN17704_c1_g1	XP_003521645.1	aspartic proteinase [Glycine max]	Glycine_max	98.4	2.9e-285
TRINITY_DN17706_c0_g1	XP_022875216.1	serine/threonine-protein kinase OXI1-like [Olea europaea var. sylvestris]	Olea_europaea	59.1	1.8e-130
TRINITY_DN17706_c0_g5	XP_017252207.1	PREDICTED: putative lysine-specific demethylase JMJ16 [Daucus carota subsp. sativus]	Daucus_carota	79.1	0
TRINITY_DN17706_c0_g9	XP_017239704.1	PREDICTED: uncharacterized protein LOC108212492 [Daucus carota subsp. sativus]	Daucus_carota	73.4	9.6e-44
TRINITY_DN17707_c0_g2	KZN10935.1	hypothetical protein DCAR_003591 [Daucus carota subsp. sativus]	Daucus_carota	38.5	2e-09
TRINITY_DN17707_c1_g4	AAT07657.1	putative PRP8 protein [Oryza sativa Japonica Group]	Oryza_sativa	85.9	1.9e-36
TRINITY_DN17708_c0_g1	XP_017231207.1	PREDICTED: uncharacterized protein LOC108205697 [Daucus carota subsp. sativus]	Daucus_carota	86.3	1.1e-162
TRINITY_DN17709_c0_g2	XP_017220218.1	PREDICTED: UPF0695 membrane protein C977.11/PB8B6.06c isoform X1 [Daucus carota subsp. sativus]	Daucus_carota	83.4	6.1e-200
TRINITY_DN17710_c0_g1	XP_017233871.1	PREDICTED: zinc finger CCCH domain-containing protein 66-like [Daucus carota subsp. sativus]	Daucus_carota	80.3	0
TRINITY_DN17711_c0_g1	XP_017256216.1	PREDICTED: uncharacterized protein LOC108225773 [Daucus carota subsp. sativus]	Daucus_carota	56.5	1.8e-74
TRINITY_DN17712_c0_g2	KZM84224.1	hypothetical protein DCAR_028229 [Daucus carota subsp. sativus]	Daucus_carota	90.4	2.3e-29
TRINITY_DN17712_c1_g2	XP_017216077.1	PREDICTED: uncharacterized protein LOC108193773 isoform X2 [Daucus carota subsp. sativus]	Daucus_carota	63.5	4.6e-85
TRINITY_DN17713_c2_g9	XP_017255511.1	PREDICTED: uncharacterized protein LOC108225198 [Daucus carota subsp. sativus]	Daucus_carota	54.2	1.9e-40
TRINITY_DN17714_c0_g1	XP_017255464.1	PREDICTED: protein NDR1-like [Daucus carota subsp. sativus]	Daucus_carota	70.6	4.5e-69
TRINITY_DN17715_c0_g1	XP_017215873.1	PREDICTED: probable cyclin-dependent serine/threonine-protein kinase DDB_G0292550 [Daucus carota subsp. sativus]	Daucus_carota	54.2	5.7e-22
TRINITY_DN17716_c0_g1	KZN08505.1	hypothetical protein DCAR_032171 [Daucus carota subsp. sativus]	Daucus_carota	86.2	4.5e-22
TRINITY_DN17717_c1_g1	XP_017257973.1	PREDICTED: glutamyl-tRNA reductase 1, chloroplastic [Daucus carota subsp. sativus]	Daucus_carota	90.4	2.4e-258
TRINITY_DN17717_c1_g4	KZN00795.1	hypothetical protein DCAR_009549 [Daucus carota subsp. sativus]	Daucus_carota	90.1	2.1e-110
TRINITY_DN17718_c1_g1	XP_017218858.1	PREDICTED: sulfite reductase 1 [ferredoxin], chloroplastic-like [Daucus carota subsp. sativus]	Daucus_carota	87.3	7.3e-250
TRINITY_DN17718_c1_g2	XP_017257417.1	PREDICTED: sulfite reductase 1 [ferredoxin], chloroplastic-like [Daucus carota subsp. sativus]	Daucus_carota	89.5	0
TRINITY_DN17722_c0_g1	XP_017226320.1	PREDICTED: dihydrolipoyl dehydrogenase 2, chloroplastic-like [Daucus carota subsp. sativus]	Daucus_carota	75.6	1.3e-10
TRINITY_DN17722_c1_g1	XP_017220681.1	PREDICTED: probable WRKY transcription factor 33 [Daucus carota subsp. sativus]	Daucus_carota	73.6	5.9e-50
TRINITY_DN17722_c2_g1	XP_017226703.1	PREDICTED: phytochrome A [Daucus carota subsp. sativus]	Daucus_carota	86.2	0
TRINITY_DN17722_c2_g3	XP_017226703.1	PREDICTED: phytochrome A [Daucus carota subsp. sativus]	Daucus_carota	83.3	1.3e-149
TRINITY_DN17724_c0_g1	XP_017233684.1	PREDICTED: uncharacterized protein LOC108207765 [Daucus carota subsp. sativus]	Daucus_carota	45.8	1.7e-22
TRINITY_DN17724_c1_g2	BAJ96866.1	predicted protein [Hordeum vulgare subsp. vulgare]	Hordeum_vulgare	47.6	2.5e-11
TRINITY_DN17725_c0_g1	KVH91401.1	DNA-binding, integrase-type, partial [Cynara cardunculus var. scolymus]	Cynara_cardunculus	39.9	7.6e-27
TRINITY_DN17727_c0_g2	XP_017252978.1	PREDICTED: inner membrane protein PPF-1, chloroplastic [Daucus carota subsp. sativus]	Daucus_carota	89.7	2.5e-179
TRINITY_DN17729_c0_g1	XP_017224639.1	PREDICTED: uncharacterized protein LOC108200885 [Daucus carota subsp. sativus]	Daucus_carota	71.1	1.8e-135
TRINITY_DN17729_c1_g1	XP_017254773.1	PREDICTED: monothiol glutaredoxin-S15, mitochondrial [Daucus carota subsp. sativus]	Daucus_carota	93.5	7.4e-36
TRINITY_DN17729_c1_g2	XP_017254773.1	PREDICTED: monothiol glutaredoxin-S15, mitochondrial [Daucus carota subsp. sativus]	Daucus_carota	95.4	2.1e-28
TRINITY_DN17729_c1_g3	XP_017254771.1	PREDICTED: acyl-protein thioesterase 2 [Daucus carota subsp. sativus]	Daucus_carota	87.5	2.1e-17
TRINITY_DN17730_c0_g1	XP_017239041.1	PREDICTED: molybdopterin synthase catalytic subunit [Daucus carota subsp. sativus]	Daucus_carota	86.1	1.7e-94
TRINITY_DN17731_c0_g1	KZM91376.1	hypothetical protein DCAR_021259 [Daucus carota subsp. sativus]	Daucus_carota	72.8	2.8e-54
TRINITY_DN17731_c0_g2	XP_017255705.1	PREDICTED: reticulon-like protein B17 [Daucus carota subsp. sativus]	Daucus_carota	76.2	1.3e-28
TRINITY_DN17731_c0_g3	KZM91376.1	hypothetical protein DCAR_021259 [Daucus carota subsp. sativus]	Daucus_carota	83.4	1.7e-64
TRINITY_DN17732_c0_g2	CAA36191.1	GOS5 [Oryza sativa Indica Group]	Oryza_sativa	100	3.8e-28
TRINITY_DN17732_c1_g1	XP_017232471.1	PREDICTED: 21 kDa protein-like [Daucus carota subsp. sativus]	Daucus_carota	82.7	6.8e-88
TRINITY_DN17732_c1_g3	XP_012470968.1	PREDICTED: glutamate dehydrogenase 2 [Gossypium raimondii]	Gossypium_raimondii	88.6	5.6e-223
TRINITY_DN17733_c0_g1	XP_003549708.1	40S ribosomal protein S11 [Glycine max]	Glycine_max	100	3.3e-82
TRINITY_DN17735_c1_g8	KZN06706.1	hypothetical protein DCAR_007543 [Daucus carota subsp. sativus]	Daucus_carota	80	1.5e-07
TRINITY_DN17737_c0_g1	XP_017232538.1	PREDICTED: protein disulfide-isomerase 5-1 [Daucus carota subsp. sativus]	Daucus_carota	91.5	1.9e-43
TRINITY_DN17738_c0_g1	XP_017243519.1	PREDICTED: uncharacterized protein At3g49140 isoform X1 [Daucus carota subsp. sativus]	Daucus_carota	79.3	1.5e-142
TRINITY_DN17739_c0_g3	XP_017221186.1	PREDICTED: receptor like protein 30-like [Daucus carota subsp. sativus]	Daucus_carota	57.5	4.3e-17
TRINITY_DN17739_c0_g4	KZM92841.1	hypothetical protein DCAR_016086 [Daucus carota subsp. sativus]	Daucus_carota	90.8	2.9e-93
TRINITY_DN17740_c1_g1	XP_017254073.1	PREDICTED: ubinuclein-1-like isoform X2 [Daucus carota subsp. sativus]	Daucus_carota	69.6	1.4e-245
TRINITY_DN17741_c0_g1	XP_017231893.1	PREDICTED: small ubiquitin-related modifier 1-like [Daucus carota subsp. sativus]	Daucus_carota	89.9	5.2e-45
TRINITY_DN17741_c0_g2	XP_027369001.1	uncharacterized protein LOC113874916 [Abrus precatorius]	Abrus_precatorius	57.4	1.1e-07
TRINITY_DN17741_c0_g4	XP_016166339.1	small ubiquitin-related modifier 2 [Arachis ipaensis]	Arachis_ipaensis	87.8	6.8e-42
TRINITY_DN17742_c0_g1	XP_017226910.1	PREDICTED: mediator of RNA polymerase II transcription subunit 33A-like isoform X1 [Daucus carota subsp. sativus]	Daucus_carota	74.1	0
TRINITY_DN17742_c0_g6	XP_017232780.1	PREDICTED: AT-hook motif nuclear-localized protein 23-like [Daucus carota subsp. sativus]	Daucus_carota	78.9	4.6e-102
TRINITY_DN17743_c0_g1	XP_017239090.1	PREDICTED: proliferating cell nuclear antigen large form [Daucus carota subsp. sativus]	Daucus_carota	94.8	6.1e-137
TRINITY_DN17744_c1_g3	XP_017250877.1	PREDICTED: uncharacterized protein LOC108221515 [Daucus carota subsp. sativus]	Daucus_carota	60	1.8e-27
TRINITY_DN17747_c1_g1	XP_017219115.1	PREDICTED: serine/threonine protein phosphatase 2A 55 kDa regulatory subunit B beta isoform [Daucus carota subsp. sativus]	Daucus_carota	96.8	3.6e-80
TRINITY_DN17747_c1_g2	XP_017252625.1	PREDICTED: serine/threonine protein phosphatase 2A 55 kDa regulatory subunit B beta isoform-like isoform X1 [Daucus carota subsp. sativus]	Daucus_carota	91.9	9.8e-66
TRINITY_DN17747_c1_g5	XP_022147548.1	serine/threonine protein phosphatase 2A 55 kDa regulatory subunit B beta isoform-like [Momordica charantia]	Momordica_charantia	69.5	1.4e-26
TRINITY_DN17747_c1_g6	XP_017219115.1	PREDICTED: serine/threonine protein phosphatase 2A 55 kDa regulatory subunit B beta isoform [Daucus carota subsp. sativus]	Daucus_carota	95.5	1.2e-93
TRINITY_DN17747_c1_g7	XP_015622075.1	serine/threonine protein phosphatase 2A 55 kDa regulatory subunit B beta isoform-like [Oryza sativa Japonica Group]	Oryza_sativa	100	1.2e-32
TRINITY_DN17748_c0_g1	XP_017250416.1	PREDICTED: dirigent protein 22-like isoform X1 [Daucus carota subsp. sativus]	Daucus_carota	70.4	2.1e-67
TRINITY_DN17748_c0_g2	XP_017250416.1	PREDICTED: dirigent protein 22-like isoform X1 [Daucus carota subsp. sativus]	Daucus_carota	82.1	2.3e-79
TRINITY_DN17749_c0_g1	XP_017250399.1	PREDICTED: DNA topoisomerase 1 [Daucus carota subsp. sativus]	Daucus_carota	81.8	6.6e-29
TRINITY_DN17750_c1_g1	XP_017227336.1	PREDICTED: NADPH-dependent diflavin oxidoreductase 1-like [Daucus carota subsp. sativus]	Daucus_carota	89.9	1.2e-45
TRINITY_DN17751_c1_g5	XP_017215105.1	PREDICTED: uncharacterized protein LOC108193051 [Daucus carota subsp. sativus]	Daucus_carota	74.2	5.4e-63
TRINITY_DN17753_c1_g2	KZM97287.1	hypothetical protein DCAR_015351 [Daucus carota subsp. sativus]	Daucus_carota	88.9	6.2e-296
TRINITY_DN17753_c1_g5	XP_017219533.1	PREDICTED: uncharacterized protein At5g39570-like [Daucus carota subsp. sativus]	Daucus_carota	79.3	4.7e-34
TRINITY_DN17755_c0_g1	XP_017227777.1	PREDICTED: heparanase-like protein 1 [Daucus carota subsp. sativus]	Daucus_carota	91.4	1.6e-87
TRINITY_DN17756_c0_g1	POO01628.1	hypothetical protein TorRG33x02_024050 [Trema orientale]	Trema_orientale	53.9	5.9e-31
TRINITY_DN17756_c0_g2	CAA66667.1	polyubiquitin [Pinus sylvestris]	Pinus_sylvestris	100	3.3e-193
TRINITY_DN17757_c1_g2	XP_003522116.2	cationic peroxidase 1 [Glycine max]	Glycine_max	96.2	1.2e-20
TRINITY_DN17759_c0_g2	XP_017254877.1	PREDICTED: probable E3 ubiquitin-protein ligase RHY1A [Daucus carota subsp. sativus]	Daucus_carota	55	1.6e-55
TRINITY_DN17763_c2_g3	XP_017234086.1	PREDICTED: uncharacterized protein LOC108208111 [Daucus carota subsp. sativus]	Daucus_carota	60.2	3e-73
TRINITY_DN17763_c2_g5	KZN05378.1	hypothetical protein DCAR_006215 [Daucus carota subsp. sativus]	Daucus_carota	72.5	3.9e-22
TRINITY_DN17764_c1_g1	XP_017234356.1	PREDICTED: monothiol glutaredoxin-S14, chloroplastic [Daucus carota subsp. sativus]	Daucus_carota	79.3	7.5e-64
TRINITY_DN17765_c0_g1	XP_017252653.1	PREDICTED: DNA-directed RNA polymerase III subunit 1 [Daucus carota subsp. sativus]	Daucus_carota	77.9	4.3e-103
TRINITY_DN17766_c1_g2	AAB69870.1	GDP dissociation inhibitor protein OsGDI1 [Oryza sativa]	Oryza_sativa	100	2.8e-61
TRINITY_DN17767_c1_g1	AKJ23352.1	CYP71AJ12 [Thapsia villosa var. laciniata]	Thapsia_villosa	78.6	1.2e-226
TRINITY_DN17767_c1_g5	XP_017231583.1	PREDICTED: uncharacterized protein LOC108205959 [Daucus carota subsp. sativus]	Daucus_carota	73.6	1.6e-78
TRINITY_DN17769_c0_g2	XP_017241009.1	PREDICTED: protein DETOXIFICATION 35-like [Daucus carota subsp. sativus]	Daucus_carota	85.9	2.3e-244
TRINITY_DN17771_c0_g2	XP_006647249.1	PREDICTED: elongation factor 2-like [Oryza brachyantha]	Oryza_brachyantha	100	2.6e-127
TRINITY_DN17772_c0_g3	XP_017253590.1	PREDICTED: 26S proteasome regulatory subunit 4 homolog A-like [Daucus carota subsp. sativus]	Daucus_carota	98.7	3.6e-167
TRINITY_DN17772_c0_g8	XP_027363923.1	26S proteasome regulatory subunit 4 homolog A-like isoform X1 [Abrus precatorius]	Abrus_precatorius	100	1.9e-31
TRINITY_DN17775_c0_g1	XP_017238307.1	PREDICTED: probable sugar phosphate/phosphate translocator At3g17430 [Daucus carota subsp. sativus]	Daucus_carota	86.8	4e-170
TRINITY_DN17777_c0_g1	XP_015879218.1	metalloendoproteinase 2-MMP-like [Ziziphus jujuba]	Ziziphus_jujuba	35.7	4.1e-11
TRINITY_DN17779_c1_g2	XP_017226769.1	PREDICTED: ATP synthase subunit beta, mitochondrial [Daucus carota subsp. sativus]	Daucus_carota	98.7	1.5e-167
TRINITY_DN17782_c0_g2	XP_017218256.1	PREDICTED: protein CDC73 homolog [Daucus carota subsp. sativus]	Daucus_carota	87.7	6.1e-200
TRINITY_DN17783_c0_g1	PPS08684.1	hypothetical protein GOBAR_AA11954 [Gossypium barbadense]	Gossypium_barbadense	58.7	1.7e-78
TRINITY_DN17784_c1_g2	KZM94681.1	hypothetical protein DCAR_017923 [Daucus carota subsp. sativus]	Daucus_carota	72	3.4e-76
TRINITY_DN17785_c0_g2	XP_017236924.1	PREDICTED: uncharacterized protein LOC108210157 [Daucus carota subsp. sativus]	Daucus_carota	72.1	6.6e-25
TRINITY_DN17786_c0_g2	XP_017231874.1	PREDICTED: PLASMODESMATA CALLOSE-BINDING PROTEIN 4 [Daucus carota subsp. sativus]	Daucus_carota	82.2	1.8e-43
TRINITY_DN17788_c0_g1	XP_017236966.1	PREDICTED: uncharacterized protein LOC108210192 [Daucus carota subsp. sativus]	Daucus_carota	91.2	7.6e-21
TRINITY_DN17789_c0_g1	KZM91969.1	hypothetical protein DCAR_020666 [Daucus carota subsp. sativus]	Daucus_carota	90.4	6.2e-20
TRINITY_DN17790_c0_g1	PHT28718.1	hypothetical protein CQW23_31697 [Capsicum baccatum]	Capsicum_baccatum	82.1	4.2e-07
TRINITY_DN17791_c0_g5	XP_017249609.1	PREDICTED: 40S ribosomal protein S7-like [Daucus carota subsp. sativus]	Daucus_carota	95.3	2.2e-96
TRINITY_DN17792_c0_g1	NP_001235973.1	NAD(P)H-dependent 6'-deoxychalcone synthase [Glycine max]	Glycine_max	100	3.3e-180
TRINITY_DN17793_c3_g5	AQL09674.1	evolutionarily conserved C-terminal region 2 [Zea mays]	Zea_mays	100	9.4e-63
TRINITY_DN17793_c3_g6	XP_017218729.1	PREDICTED: uncharacterized protein LOC108196126 [Daucus carota subsp. sativus]	Daucus_carota	73.6	5.3e-91
TRINITY_DN17795_c1_g1	KZM99572.1	hypothetical protein DCAR_013066 [Daucus carota subsp. sativus]	Daucus_carota	97.3	2.8e-81
TRINITY_DN17795_c1_g6	XP_017231060.1	PREDICTED: probable 2,3-bisphosphoglycerate-independent phosphoglycerate mutase [Daucus carota subsp. sativus]	Daucus_carota	91.9	1.8e-269
TRINITY_DN17795_c1_g9	RXH69554.1	hypothetical protein DVH24_037338 [Malus domestica]	Malus_domestica	94.8	8.6e-59
TRINITY_DN17796_c0_g1	XP_017257191.1	PREDICTED: uncharacterized protein LOC108226706 [Daucus carota subsp. sativus]	Daucus_carota	73.9	1.1e-21
TRINITY_DN17796_c0_g2	XP_017251847.1	PREDICTED: uncharacterized protein LOC108222438 [Daucus carota subsp. sativus]	Daucus_carota	78.3	6.7e-75
TRINITY_DN17798_c0_g1	XP_017241128.1	PREDICTED: uncharacterized protein LOC108213849 [Daucus carota subsp. sativus]	Daucus_carota	55.6	5.6e-42
TRINITY_DN17801_c0_g2	XP_017242946.1	PREDICTED: probable diphthine methyl ester synthase isoform X1 [Daucus carota subsp. sativus]	Daucus_carota	92.5	3.7e-150
TRINITY_DN17802_c0_g1	BAT04161.1	Os08g0190200 [Oryza sativa Japonica Group]	Oryza_sativa	100	2.4e-37
TRINITY_DN17802_c1_g1	CAE04743.3	OSJNBb0060E08.6 [Oryza sativa Japonica Group]	Oryza_sativa	100	3.6e-32
TRINITY_DN17802_c1_g3	CAE04743.3	OSJNBb0060E08.6 [Oryza sativa Japonica Group]	Oryza_sativa	100	2.3e-34
TRINITY_DN17802_c2_g2	KZM90265.1	hypothetical protein DCAR_022370 [Daucus carota subsp. sativus]	Daucus_carota	82.5	8.9e-196
TRINITY_DN17802_c2_g5	XP_017221304.1	PREDICTED: protein FAR1-RELATED SEQUENCE 12-like [Daucus carota subsp. sativus]	Daucus_carota	46.6	4.3e-11
TRINITY_DN17803_c1_g3	KZN06498.1	hypothetical protein DCAR_007335 [Daucus carota subsp. sativus]	Daucus_carota	94.3	4.6e-28
TRINITY_DN17804_c0_g1	BAJ91591.1	predicted protein [Hordeum vulgare subsp. vulgare]	Hordeum_vulgare	69.7	3.9e-80
TRINITY_DN17805_c1_g1	YP_008816172.1	cytochrome c oxidase subunit 1 (mitochondrion) [Roya obtusa]	Roya_obtusa	65.7	4.8e-185
TRINITY_DN17805_c1_g2	AEO21063.1	cytochrome c oxidase subunit 1 (mitochondrion) [Silene conica]	Silene_conica	64.5	4.5e-183
TRINITY_DN17805_c1_g3	XP_017241803.1	PREDICTED: chaperone protein ClpB1 [Daucus carota subsp. sativus]	Daucus_carota	93.5	0
TRINITY_DN17805_c1_g4	AEO21063.1	cytochrome c oxidase subunit 1 (mitochondrion) [Silene conica]	Silene_conica	65.3	8.4e-185
TRINITY_DN17806_c0_g2	XP_017219273.1	PREDICTED: suppressor of mec-8 and unc-52 protein homolog 2 [Daucus carota subsp. sativus]	Daucus_carota	85.5	1.8e-239
TRINITY_DN17806_c0_g3	XP_017222675.1	PREDICTED: regulator of nonsense transcripts UPF2 [Daucus carota subsp. sativus]	Daucus_carota	92.4	0
TRINITY_DN17806_c0_g7	XP_017243451.1	PREDICTED: protein CURVATURE THYLAKOID 1D, chloroplastic [Daucus carota subsp. sativus]	Daucus_carota	53.2	2e-43
TRINITY_DN17807_c1_g1	XP_017257969.1	PREDICTED: eukaryotic translation initiation factor 4E-1 [Daucus carota subsp. sativus]	Daucus_carota	76.4	2.2e-94
TRINITY_DN17808_c0_g3	XP_008443634.1	PREDICTED: dnaJ protein homolog [Cucumis melo]	Cucumis_melo	89.7	1e-102
TRINITY_DN17809_c0_g2	KZN03297.1	hypothetical protein DCAR_012053 [Daucus carota subsp. sativus]	Daucus_carota	62.2	1.6e-37
TRINITY_DN17810_c0_g1	XP_017219294.1	PREDICTED: serine/threonine-protein phosphatase PP2A catalytic subunit [Daucus carota subsp. sativus]	Daucus_carota	99.1	2.6e-142
TRINITY_DN17811_c0_g2	XP_017249049.1	PREDICTED: SWR1-complex protein 4 isoform X1 [Daucus carota subsp. sativus]	Daucus_carota	79.1	6.8e-10
TRINITY_DN17812_c1_g2	XP_017237933.1	PREDICTED: uncharacterized protein LOC108210977 [Daucus carota subsp. sativus]	Daucus_carota	88.2	8e-26
TRINITY_DN17812_c1_g4	XP_017237933.1	PREDICTED: uncharacterized protein LOC108210977 [Daucus carota subsp. sativus]	Daucus_carota	89.7	6e-27
TRINITY_DN17813_c0_g2	XP_017254148.1	PREDICTED: probable methyltransferase PMT15 [Daucus carota subsp. sativus]	Daucus_carota	85.4	0
TRINITY_DN17813_c0_g6	XP_017253045.1	PREDICTED: phospho-2-dehydro-3-deoxyheptonate aldolase 2, chloroplastic-like [Daucus carota subsp. sativus]	Daucus_carota	95.3	8.3e-41
TRINITY_DN17813_c0_g9	XP_017235949.1	PREDICTED: probable methyltransferase PMT14 [Daucus carota subsp. sativus]	Daucus_carota	85.6	0
TRINITY_DN17814_c0_g1	KZM94468.1	hypothetical protein DCAR_017711 [Daucus carota subsp. sativus]	Daucus_carota	69.6	1.6e-11
TRINITY_DN17816_c0_g1	XP_017234010.1	PREDICTED: uncharacterized protein LOC108208046 [Daucus carota subsp. sativus]	Daucus_carota	77.6	3.5e-67
TRINITY_DN17816_c0_g2	XP_017234010.1	PREDICTED: uncharacterized protein LOC108208046 [Daucus carota subsp. sativus]	Daucus_carota	66	3.3e-65
TRINITY_DN17817_c0_g1	XP_017234035.1	PREDICTED: cytosolic sulfotransferase 15-like [Daucus carota subsp. sativus]	Daucus_carota	78.7	3e-156
TRINITY_DN17818_c2_g1	XP_017237859.1	PREDICTED: probable prolyl 4-hydroxylase 6 [Daucus carota subsp. sativus]	Daucus_carota	51.9	1.8e-127
TRINITY_DN17818_c2_g2	XP_027109535.1	DNA-directed RNA polymerase II subunit RPB7-like [Coffea arabica]	Coffea_arabica	90.6	9.9e-96
TRINITY_DN17818_c2_g3	XP_017214804.1	PREDICTED: alpha-protein kinase 1-like [Daucus carota subsp. sativus]	Daucus_carota	81.9	2.3e-56
TRINITY_DN17819_c3_g2	XP_017233374.1	PREDICTED: uncharacterized protein LOC108207434 [Daucus carota subsp. sativus]	Daucus_carota	60.5	5e-71
TRINITY_DN17820_c0_g2	KZN04986.1	hypothetical protein DCAR_005823 [Daucus carota subsp. sativus]	Daucus_carota	70.7	5.1e-42
TRINITY_DN17821_c0_g1	XP_017233001.1	PREDICTED: eukaryotic translation initiation factor 3 subunit H isoform X1 [Daucus carota subsp. sativus]	Daucus_carota	91.2	9.1e-112
TRINITY_DN17822_c0_g1	XP_017236207.1	PREDICTED: flowering locus K homology domain-like [Daucus carota subsp. sativus]	Daucus_carota	89.6	6.2e-210
TRINITY_DN17822_c0_g5	XP_017234759.1	PREDICTED: beta-glucosidase BoGH3B [Daucus carota subsp. sativus]	Daucus_carota	90.3	0
TRINITY_DN17823_c0_g1	XP_017248025.1	PREDICTED: uncharacterized protein LOC108219212 [Daucus carota subsp. sativus]	Daucus_carota	40.6	3.3e-07
TRINITY_DN17824_c0_g1	XP_017256324.1	PREDICTED: uncharacterized protein LOC108225881 [Daucus carota subsp. sativus]	Daucus_carota	50	3.5e-15
TRINITY_DN17824_c1_g1	XP_002272597.2	PREDICTED: double-stranded RNA-binding protein 4 isoform X3 [Vitis vinifera]	Vitis_vinifera	47.6	1.8e-49
TRINITY_DN17827_c0_g1	XP_017236797.1	PREDICTED: uncharacterized protein LOC108210060 [Daucus carota subsp. sativus]	Daucus_carota	65.6	9.2e-61
TRINITY_DN17828_c2_g3	XP_017237556.1	PREDICTED: nuclear transport factor 2-like [Daucus carota subsp. sativus]	Daucus_carota	88.6	8.8e-58
TRINITY_DN17829_c1_g2	XP_015635907.1	ubiquitin-conjugating enzyme E2 variant 1C isoform X1 [Oryza sativa Japonica Group]	Oryza_sativa	100	6.5e-26
TRINITY_DN17830_c2_g1	XP_002277877.2	PREDICTED: heavy metal-associated isoprenylated plant protein 30 [Vitis vinifera]	Vitis_vinifera	79.7	5.3e-66
TRINITY_DN17830_c2_g2	XP_017219561.1	PREDICTED: gamma carbonic anhydrase 1, mitochondrial-like [Daucus carota subsp. sativus]	Daucus_carota	91.2	2.8e-127
TRINITY_DN17832_c0_g4	XP_017228375.1	PREDICTED: GATA transcription factor 26-like isoform X2 [Daucus carota subsp. sativus]	Daucus_carota	82.8	1.6e-108
TRINITY_DN17832_c0_g8	XP_017228375.1	PREDICTED: GATA transcription factor 26-like isoform X2 [Daucus carota subsp. sativus]	Daucus_carota	59.6	4.7e-159
[truncated: 20,321 more rows]
