# Supplementary material for: Drought Stress Stimulates the Terpenoid Backbone and Triterpenoid Biosynthesis Pathway to Promote the Synthesis of Saikosaponin in Bupleurum chinense DC. Roots
Source: Molecules. 2022 Aug 25;27(17):5470. doi: 10.3390/molecules27175470 (PMC9457724; doi:10.3390/molecules27175470)
Supplement: Supplementary file 1 [file molecules-27-05470-s001.zip › Supplementary Material. Table S2. eggNOG_annotation.xlsx]

## Sheet: Sheet1
Query	eggNOG_hit	eggNOG_identity	eggNOG_evalue	NOG	COGFunctionalCategory	COGFunctionalCategoryDescription	NOGDescription
TRINITY_DN10009_c0_g1	29760.VIT_08s0007g03620.t01	84.8	1.2e-22	COG2058	J	Translation, ribosomal structure and biogenesis	Ribosomal protein
TRINITY_DN1000_c0_g1	39946.BGIOSGA001620-PA	100	2e-31	COG0017	J	Translation, ribosomal structure and biogenesis	asparaginyl-tRNA synthetase
TRINITY_DN10012_c0_g1	39946.BGIOSGA009088-PA	100	2.8e-36	ENOG410YDP8	S	Function unknown	LRR
TRINITY_DN10015_c0_g1	39946.BGIOSGA012313-PA	100	3.2e-48	COG4775	M	Cell wall/membrane/envelope biogenesis	Gram-negative-bacterium-type cell outer membrane assembly
TRINITY_DN1002_c0_g1	3711.Bra021820.1-P	43.7	8.9e-50	NA	NA	NA	NA
TRINITY_DN10037_c0_g1	39946.BGIOSGA015647-PA	100	4e-41	ENOG410XP07	J	Translation, ribosomal structure and biogenesis	eukaryotic translation initiation factor 2c
TRINITY_DN10053_c0_g1	7955.ENSDARP00000032730	100	6.5e-11	COG1282	C	Energy production and conversion	The transhydrogenation between NADH and NADP is coupled to respiration and ATP hydrolysis and functions as a proton pump across the membrane (By similarity)
TRINITY_DN10053_c0_g1	7955.ENSDARP00000032730	100	6.5e-11	COG3288	C	Energy production and conversion	The transhydrogenation between NADH and NADP is coupled to respiration and ATP hydrolysis and functions as a proton pump across the membrane (By similarity)
TRINITY_DN10055_c0_g1	6334.EFV50992	85.7	1.8e-28	COG2139	J	Translation, ribosomal structure and biogenesis	(ribosomal) protein
TRINITY_DN10059_c0_g1	39946.BGIOSGA020299-PA	100	1.1e-42	ENOG410XRSQ	S	Function unknown	Transfer protein
TRINITY_DN1007_c0_g1	4081.Solyc02g090210.2.1	81.2	4.4e-178	ENOG410ZH2N	S	Function unknown	GDSL esterase lipase
TRINITY_DN10111_c0_g1	7955.ENSDARP00000075482	90.7	1.1e-50	COG3155	Q	Secondary metabolites biosynthesis, transport and catabolism	Isoprenoid biosynthesis protein with amidotransferase-like domain
TRINITY_DN10134_c0_g1	3711.Bra003855.1-P	71	6.5e-17	ENOG410ZCC8	S	Function unknown	NA
TRINITY_DN10140_c0_g1	3847.GLYMA14G07120.1	100	7.6e-31	COG0014	E	Amino acid transport and metabolism	Catalyzes the NADPH dependent reduction of L-gamma- glutamyl 5-phosphate into L-glutamate 5-semialdehyde and phosphate. The product spontaneously undergoes cyclization to form 1-pyrroline-5-carboxylate (By similarity)
TRINITY_DN10140_c0_g1	3847.GLYMA14G07120.1	100	7.6e-31	COG0263	E	Amino acid transport and metabolism	Catalyzes the transfer of a phosphate group to glutamate to form glutamate 5-phosphate which rapidly cyclizes to 5- oxoproline (By similarity)
TRINITY_DN10146_c0_g1	29760.VIT_01s0011g01270.t01	67	8.9e-32	ENOG4112D64	S	Function unknown	VMA21-like domain
TRINITY_DN1014_c0_g1	39946.BGIOSGA019034-PA	100	2e-08	COG0702	G	Carbohydrate transport and metabolism	epimerase dehydratase
TRINITY_DN1014_c0_g1	39946.BGIOSGA019034-PA	100	2e-08	COG0702	M	Cell wall/membrane/envelope biogenesis	epimerase dehydratase
TRINITY_DN10158_c0_g1	39946.BGIOSGA000359-PA	98.8	4.7e-40	COG0046	F	Nucleotide transport and metabolism	phosphoribosylformylglycinamidine synthase
TRINITY_DN10158_c0_g1	39946.BGIOSGA000359-PA	98.8	4.7e-40	COG0047	F	Nucleotide transport and metabolism	phosphoribosylformylglycinamidine synthase
TRINITY_DN1015_c0_g1	3847.GLYMA05G18376.1	96.8	9.4e-26	NA	NA	NA	NA
TRINITY_DN10165_c0_g1	3847.GLYMA17G07060.2	100	3.3e-23	ENOG410YT7Z	K	Transcription	Sm
TRINITY_DN10165_c0_g2	9606.ENSP00000266735	100	1.5e-35	ENOG4111W47	K	Transcription	small nuclear ribonucleoprotein
TRINITY_DN10169_c0_g1	3847.GLYMA09G29030.1	100	2.7e-31	COG0638	O	Posttranslational modification, protein turnover, chaperones	The proteasome is a multicatalytic proteinase complex which is characterized by its ability to cleave peptides with Arg, Phe, Tyr, Leu, and Glu adjacent to the leaving group at neutral or slightly basic pH. The proteasome has an ATP-dependent proteolytic activity (By similarity)
TRINITY_DN10174_c0_g1	39946.BGIOSGA012295-PA	100	1e-36	COG0515	T	Signal transduction mechanisms	Serine Threonine protein kinase
TRINITY_DN10180_c0_g1	3847.GLYMA13G34580.2	100	1.1e-29	COG5040	T	Signal transduction mechanisms	Tyrosine 3-monooxygenase tryptophan 5-monooxygenase activation protein
TRINITY_DN10184_c0_g1	9606.ENSP00000299767	100	5.3e-14	COG0326	O	Posttranslational modification, protein turnover, chaperones	Molecular chaperone. Has ATPase activity (By similarity)
TRINITY_DN10189_c0_g2	39946.BGIOSGA020481-PA	100	7.7e-34	ENOG410XPF6	L	Replication, recombination and repair	DNA- binding protein
TRINITY_DN1018_c0_g1	9606.ENSP00000324124	100	2.9e-32	COG1644	K	Transcription	DNA-dependent RNA polymerase catalyzes the transcription of DNA into RNA using the four ribonucleoside triphosphates as substrates
TRINITY_DN10196_c0_g1	3847.GLYMA15G42980.1	100	1.1e-34	ENOG4111C37	S	Function unknown	response to biotic stimulus
TRINITY_DN10212_c0_g1	3847.GLYMA02G15120.1	49.1	1.3e-10	COG0657	I	Lipid transport and metabolism	alpha beta hydrolase fold-3 domain protein
TRINITY_DN10212_c0_g2	4081.Solyc01g108540.2.1	50.7	3e-11	COG0657	I	Lipid transport and metabolism	alpha beta hydrolase fold-3 domain protein
TRINITY_DN1021_c0_g1	9606.ENSP00000243997	100	1.2e-19	ENOG410Y5P5	C	Energy production and conversion	Mitochondrial membrane ATP synthase (F(1)F(0) ATP synthase or Complex V) produces ATP from ADP in the presence of a proton gradient across the membrane which is generated by electron transport complexes of the respiratory chain. F-type ATPases consist of two structural domains, F(1) - containing the extramembraneous catalytic core, and F(0) - containing the membrane proton channel, linked togethe…
TRINITY_DN10236_c0_g1	3847.GLYMA01G20760.1	100	2.3e-36	COG0169	E	Amino acid transport and metabolism	shikimate dehydrogenase
TRINITY_DN10236_c0_g1	3847.GLYMA01G20760.1	100	2.3e-36	COG0710	E	Amino acid transport and metabolism	Type I DHQase
TRINITY_DN10239_c0_g1	7955.ENSDARP00000007716	100	4.3e-23	ENOG4111TZ1	I	Lipid transport and metabolism	Mitochondrial membrane ATP synthase (F(1)F(0) ATP synthase or Complex V) produces ATP from ADP in the presence of a proton gradient across the membrane which is generated by electron transport complexes of the respiratory chain. F-type ATPases consist of two structural domains, F(1) - containing the extramembraneous catalytic core, and F(0) - containing the membrane proton channel, linked togethe…
TRINITY_DN10261_c0_g1	3847.GLYMA08G19380.2	100	2e-36	ENOG411247S	C	Energy production and conversion	This is a component of the ubiquinol-cytochrome c reductase complex (complex III or cytochrome b-c1 complex), which is part of the mitochondrial respiratory chain. This protein may mediate formation of the complex between cytochromes c and c1 (By similarity)
TRINITY_DN10275_c0_g1	39947.LOC_Os02g03280.2	100	1.9e-29	ENOG4111GCT	S	Function unknown	Bax inhibitor
TRINITY_DN10281_c0_g1	39946.BGIOSGA004017-PA	100	8e-34	ENOG410XRMJ	T	Signal transduction mechanisms	calcium-dependent protein kinase
TRINITY_DN10300_c0_g1	39947.LOC_Os08g04440.1	98.8	4.4e-42	COG0724	S	Function unknown	Rna-binding protein
TRINITY_DN10307_c0_g1	4113.PGSC0003DMT400070909	42.9	3.9e-06	NA	NA	NA	NA
TRINITY_DN10309_c0_g1	3694.POPTR_0009s03920.1	67.3	2e-10	ENOG410ZEKB	S	Function unknown	DVL family
TRINITY_DN10339_c0_g1	39946.BGIOSGA036362-PA	100	6.2e-40	ENOG41104RV	S	Function unknown	NA
TRINITY_DN10345_c0_g1	3847.GLYMA09G12320.1	100	5.1e-39	ENOG410Y00J	S	Function unknown	NA
TRINITY_DN10356_c0_g1	31033.ENSTRUP00000016679	63.5	3.8e-30	ENOG410ZT1C	S	Function unknown	(chemokine (C-X-C motif) ligand
TRINITY_DN10359_c0_g1	9606.ENSP00000298852	100	7.2e-36	COG1222	O	Posttranslational modification, protein turnover, chaperones	26S protease regulatory subunit
TRINITY_DN10381_c0_g1	8128.ENSONIP00000000291	80.8	1.9e-27	ENOG410XPH6	Z	Cytoskeleton	guanine nucleotide exchange factor
TRINITY_DN103_c0_g1	7955.ENSDARP00000087876	89.5	4.1e-34	COG0838	C	Energy production and conversion	NDH-1 shuttles electrons from NADH, via FMN and iron- sulfur (Fe-S) centers, to quinones in the respiratory chain
TRINITY_DN10400_c0_g2	39946.BGIOSGA008761-PA	93.6	2.5e-10	ENOG410ZMQE	S	Function unknown	14 kDa proline-rich protein DC2.15-like
TRINITY_DN10406_c0_g1	29760.VIT_00s0189g00010.t01	39.2	1.8e-41	ENOG410YY6X	S	Function unknown	NA
TRINITY_DN10415_c0_g1	3847.GLYMA08G21440.1	100	3e-34	COG5186	A	RNA processing and modification	polyA polymerase
TRINITY_DN10426_c0_g1	8128.ENSONIP00000009513	86.2	3.2e-17	COG2453	T	Signal transduction mechanisms	dual specificity phosphatase
TRINITY_DN1042_c0_g1	7739.JGI210558	85.3	1.9e-29	ENOG410XPVF	T	Signal transduction mechanisms	serine threonine-protein phosphatase
TRINITY_DN1045_c0_g1	39946.BGIOSGA028096-PA	100	7.3e-44	COG2940	S	Function unknown	Histone-lysine N-methyltransferase
TRINITY_DN10481_c0_g1	31234.CRE11879	42.9	5.4e-08	COG1501	G	Carbohydrate transport and metabolism	hydrolase, family 31
TRINITY_DN1048_c0_g1	39947.LOC_Os03g58270.1	41.8	1e-08	COG2801	L	Replication, recombination and repair	Retrotransposon protein
TRINITY_DN10494_c0_g1	39946.BGIOSGA018005-PA	100	6e-19	ENOG410XRSQ	S	Function unknown	Transfer protein
TRINITY_DN10521_c0_g1	7955.ENSDARP00000014106	97.9	3.2e-11	ENOG410XQA0	K	Transcription	Splicing factor proline
TRINITY_DN10538_c0_g1	12957.ACEP_00003591-PA	72.8	1.5e-22	COG1358	J	Translation, ribosomal structure and biogenesis	(ribosomal) protein
TRINITY_DN10542_c1_g1	7955.ENSDARP00000111279	58.1	2e-18	ENOG410Z4S5	U	Intracellular trafficking, secretion, and vesicular transport	CD79b molecule, immunoglobulin-associated beta
TRINITY_DN10551_c0_g2	7955.ENSDARP00000077884	79.8	3.1e-32	ENOG4110QAI	S	Function unknown	RCSD domain containing 1
TRINITY_DN1055_c0_g1	3702.AT5G23850.1	83.3	1.2e-31	ENOG410XT5U	S	Function unknown	KDEL (Lys-Asp-Glu-Leu) containing
TRINITY_DN10575_c0_g1	39946.BGIOSGA026108-PA	78.5	9.4e-25	ENOG410YG6P	S	Function unknown	Finger protein
TRINITY_DN10576_c0_g2	7955.ENSDARP00000060443	100	8.4e-28	COG0199	J	Translation, ribosomal structure and biogenesis	Binds 16S rRNA, required for the assembly of 30S particles and may also be responsible for determining the conformation of the 16S rRNA at the A site (By similarity)
TRINITY_DN10601_c0_g1	3847.GLYMA08G27520.1	100	3.5e-44	ENOG410XTGQ	S	Function unknown	Solute carrier family 25 member
TRINITY_DN10603_c0_g1	7955.ENSDARP00000088691	100	7e-21	ENOG4111GSB	K	Transcription	heterogeneous nuclear ribonucleoprotein k
TRINITY_DN10614_c1_g1	39946.BGIOSGA009779-PA	100	1.3e-39	ENOG410YVVN	S	Function unknown	Laminlike
TRINITY_DN10617_c0_g1	39946.BGIOSGA011050-PA	100	1.4e-20	ENOG410YR10	S	Function unknown	expressed protein
TRINITY_DN10622_c0_g1	39946.BGIOSGA009803-PA	100	5.4e-29	COG5114	B	Chromatin structure and dynamics	transcriptional
TRINITY_DN10622_c0_g2	39946.BGIOSGA009803-PA	100	2.8e-36	COG5114	B	Chromatin structure and dynamics	transcriptional
TRINITY_DN10624_c0_g1	39946.BGIOSGA027647-PA	100	5.1e-33	ENOG410XT6G	S	Function unknown	Transmembrane protein 120B
TRINITY_DN1065_c0_g1	3847.GLYMA08G25950.1	100	1.2e-37	COG2124	Q	Secondary metabolites biosynthesis, transport and catabolism	Cytochrome p450
TRINITY_DN10669_c0_g1	578458.XP_003036077.1	80.2	2.7e-08	ENOG410ZNFA	O	Posttranslational modification, protein turnover, chaperones	Heat shock protein 9/12
TRINITY_DN1067_c0_g1	7955.ENSDARP00000032730	100	7.7e-42	COG1282	C	Energy production and conversion	The transhydrogenation between NADH and NADP is coupled to respiration and ATP hydrolysis and functions as a proton pump across the membrane (By similarity)
TRINITY_DN1067_c0_g1	7955.ENSDARP00000032730	100	7.7e-42	COG3288	C	Energy production and conversion	The transhydrogenation between NADH and NADP is coupled to respiration and ATP hydrolysis and functions as a proton pump across the membrane (By similarity)
TRINITY_DN10680_c0_g1	3847.GLYMA04G08510.1	100	1.3e-19	ENOG410XTES	U	Intracellular trafficking, secretion, and vesicular transport	signal peptide peptidase
TRINITY_DN1068_c0_g1	39946.BGIOSGA027218-PA	100	6.7e-35	ENOG410XR9Z	S	Function unknown	homolog, nonsense mediated mRNA decay factor (C. elegans)
TRINITY_DN106_c0_g1	39947.LOC_Os01g65080.1	97.5	1.4e-12	COG5048	S	Function unknown	Zinc finger protein
TRINITY_DN10717_c0_g3	7955.ENSDARP00000123883	100	1e-52	COG1048	C	Energy production and conversion	aconitate hydratase
TRINITY_DN1072_c0_g1	39946.BGIOSGA006344-PA	100	1e-43	COG0296	G	Carbohydrate transport and metabolism	Catalyzes the formation of the alpha-1,6-glucosidic linkages in glycogen by scission of a 1,4-alpha-linked oligosaccharide from growing alpha-1,4-glucan chains and the subsequent attachment of the oligosaccharide to the alpha-1,6 position (By similarity)
TRINITY_DN10764_c0_g1	7955.ENSDARP00000091816	100	8.2e-43	COG0334	E	Amino acid transport and metabolism	oxidoreductase activity, acting on the CH-NH2 group of donors, NAD or NADP as acceptor
TRINITY_DN10772_c0_g1	4113.PGSC0003DMT400075613	54.3	7.1e-58	ENOG410XS63	S	Function unknown	Exonuclease 3'-5' domain containing 2
TRINITY_DN10778_c0_g1	3847.GLYMA18G40750.1	100	2.1e-25	ENOG4111MS5	S	Function unknown	Mitochondrial glycoprotein family protein
TRINITY_DN10779_c0_g1	479433.Caci_4179	55.7	4e-11	COG0531	E	Amino acid transport and metabolism	amino acid
TRINITY_DN10796_c0_g1	3847.GLYMA0022S00420.1	100	9.1e-19	ENOG410YG0Z	S	Function unknown	Agenet domain-containing protein bromo-adjacent homology (BAH) domain-containing protein
TRINITY_DN10809_c0_g1	3694.POPTR_0007s04060.1	56.8	1.3e-17	ENOG410ZA5Y	S	Function unknown	LysM domain
TRINITY_DN10811_c0_g1	3694.POPTR_0010s11290.1	61.6	4.4e-71	ENOG4111FKI	O	Posttranslational modification, protein turnover, chaperones	Cytochrome
TRINITY_DN10812_c0_g1	318829.MGG_07763T0	55.3	8.1e-19	COG1785	P	Inorganic ion transport and metabolism	alkaline phosphatase
TRINITY_DN10815_c0_g1	9598.ENSPTRP00000018583	100	1.5e-49	ENOG41121WM	O	Posttranslational modification, protein turnover, chaperones	cytochrome C oxidase
TRINITY_DN10821_c0_g2	7955.ENSDARP00000109589	71.8	3e-22	ENOG4111KGD	U	Intracellular trafficking, secretion, and vesicular transport	Cytotoxic and regulatory T cell molecule
TRINITY_DN10830_c0_g1	3694.POPTR_0009s00990.1	73.3	1e-17	COG0526	O	Posttranslational modification, protein turnover, chaperones	Thioredoxin
TRINITY_DN10832_c0_g1	4538.ORGLA04G0245400.1	100	3.4e-18	ENOG410YTTR	S	Function unknown	NA
TRINITY_DN10839_c0_g1	7955.ENSDARP00000082898	98.7	9.3e-38	ENOG410XQT5	S	Function unknown	RAB21, member RAS oncogene family
TRINITY_DN10849_c0_g1	39946.BGIOSGA016027-PA	100	1.4e-32	COG3733	Q	Secondary metabolites biosynthesis, transport and catabolism	amine oxidase
TRINITY_DN10852_c0_g1	7955.ENSDARP00000118616	86.5	1.2e-18	COG2340	S	Function unknown	Scp-like extracellular
TRINITY_DN1085_c0_g1	39946.BGIOSGA033656-PA	100	6.4e-22	COG0204	I	Lipid transport and metabolism	Acyltransferase
TRINITY_DN10868_c0_g2	7955.ENSDARP00000072260	72.6	7.7e-38	ENOG410YHX9	U	Intracellular trafficking, secretion, and vesicular transport	Major histocompatibility complex class II
TRINITY_DN10868_c0_g3	7955.ENSDARP00000048447	75	4.8e-101	ENOG410YHX9	U	Intracellular trafficking, secretion, and vesicular transport	Major histocompatibility complex class II
TRINITY_DN10871_c0_g1	59689.Al_scaffold_0007_1412	57.9	3.1e-20	COG0515	T	Signal transduction mechanisms	Serine Threonine protein kinase
TRINITY_DN10880_c0_g1	4081.Solyc01g107610.2.1	52.3	1.8e-16	ENOG4111T1J	S	Function unknown	PRKR interacting protein 1 (IL11 inducible)
TRINITY_DN10888_c0_g1	4081.Solyc03g111720.2.1	79.6	3.6e-86	COG0225	O	Posttranslational modification, protein turnover, chaperones	Has an important function as a repair enzyme for proteins that have been inactivated by oxidation. Catalyzes the reversible oxidation-reduction of methionine sulfoxide in proteins to methionine (By similarity)
TRINITY_DN10889_c0_g2	39946.BGIOSGA008034-PA	100	2.3e-17	ENOG41127M7	S	Function unknown	Transcription factor Pcc1
TRINITY_DN1088_c0_g1	9606.ENSP00000400591	100	5.6e-31	COG1958	K	Transcription	small nuclear ribonucleoprotein
TRINITY_DN10890_c0_g1	3847.GLYMA14G09510.1	100	1.3e-30	COG1446	E	Amino acid transport and metabolism	asparaginase
TRINITY_DN10892_c0_g1	3847.GLYMA14G02020.3	100	1.4e-35	ENOG410YA8Z	S	Function unknown	Rna-binding protein
TRINITY_DN10897_c0_g3	3847.GLYMA08G37670.1	100	2.2e-24	COG1154	H	Coenzyme transport and metabolism	Catalyzes the acyloin condensation reaction between C atoms 2 and 3 of pyruvate and glyceraldehyde 3-phosphate to yield 1-deoxy-D-xylulose-5-phosphate (DXP) (By similarity)
TRINITY_DN10899_c0_g1	39946.BGIOSGA013991-PA	100	1.3e-08	ENOG410XPR7	S	Function unknown	Transducin beta-like protein
TRINITY_DN10902_c0_g1	3847.GLYMA10G02210.1	96	4.7e-16	ENOG410ZEWF	S	Function unknown	late embryogenesis abundant protein
TRINITY_DN10904_c0_g1	9606.ENSP00000263228	100	1.7e-35	COG5078	O	Posttranslational modification, protein turnover, chaperones	ubiquitin-conjugating enzyme
TRINITY_DN10909_c0_g1	3847.GLYMA17G17240.2	38.6	2.6e-16	ENOG410Z59D	S	Function unknown	NA
TRINITY_DN10910_c0_g1	7955.ENSDARP00000082351	94.6	3.7e-31	COG0531	E	Amino acid transport and metabolism	amino acid
TRINITY_DN10928_c0_g1	9606.ENSP00000346088	100	4e-60	ENOG4111UVJ	J	Translation, ribosomal structure and biogenesis	Ribosomal protein
TRINITY_DN1092_c0_g1	7955.ENSDARP00000105632	100	6.1e-28	ENOG410XTJ5	S	Function unknown	RNA binding motif protein
TRINITY_DN10930_c0_g1	7955.ENSDARP00000045409	73.1	3.2e-14	ENOG410YYC2	D	Cell cycle control, cell division, chromosome partitioning	Thy-1 cell surface antigen
TRINITY_DN10932_c0_g1	9606.ENSP00000225655	100	1.5e-65	ENOG41126PD	O	Posttranslational modification, protein turnover, chaperones	Binds to actin and affects the structure of the cytoskeleton. At high concentrations, profilin prevents the polymerization of actin, whereas it enhances it at low concentrations (By
TRINITY_DN10959_c1_g1	7955.ENSDARP00000060342	74.3	4.1e-36	ENOG410YK57	K	Transcription	pas domain protein
TRINITY_DN10959_c1_g2	7955.ENSDARP00000060342	100	5.3e-30	ENOG410YK57	K	Transcription	pas domain protein
TRINITY_DN10986_c0_g2	8128.ENSONIP00000012320	75.9	5.4e-13	COG0174	E	Amino acid transport and metabolism	glutamine synthetase
TRINITY_DN1098_c0_g1	4538.ORGLA04G0206400.1	100	2.1e-30	ENOG410YFT7	K	Transcription	growth-regulating factor
TRINITY_DN10991_c0_g1	29760.VIT_05s0049g02120.t01	80.9	1.9e-14	ENOG410YIT8	S	Function unknown	Universal stress protein family
TRINITY_DN11010_c0_g1	39946.BGIOSGA003065-PA	50.7	2.6e-06	ENOG410XP8C	O	Posttranslational modification, protein turnover, chaperones	ubiquitin-conjugating enzyme
TRINITY_DN11012_c0_g1	3847.GLYMA17G12610.2	100	1.7e-26	ENOG410YVQQ	S	Function unknown	early nodulin
TRINITY_DN11014_c0_g1	3694.POPTR_0001s25030.1	48.6	4.3e-15	ENOG4111EE5	S	Function unknown	NA
TRINITY_DN11032_c0_g1	7955.ENSDARP00000109529	100	2.6e-28	COG5181	A	RNA processing and modification	Splicing factor 3b subunit
TRINITY_DN11034_c0_g1	3847.GLYMA10G01750.1	84.1	5.1e-99	ENOG4111HFX	S	Function unknown	Transmembrane protein 205
TRINITY_DN11039_c0_g1	7955.ENSDARP00000066948	83.6	4.1e-27	ENOG410XRXV	T	Signal transduction mechanisms	FYVE, RhoGEF and PH domain containing
TRINITY_DN11039_c0_g2	7955.ENSDARP00000066948	47.7	8.5e-15	ENOG410XRXV	T	Signal transduction mechanisms	FYVE, RhoGEF and PH domain containing
TRINITY_DN1103_c0_g1	3847.GLYMA19G34350.1	100	5.4e-32	COG0159	E	Amino acid transport and metabolism	The alpha subunit is responsible for the aldol cleavage of indoleglycerol phosphate to indole and glyceraldehyde 3- phosphate (By similarity)
TRINITY_DN11041_c0_g1	3847.GLYMA04G14650.1	100	6.6e-29	COG4281	I	Lipid transport and metabolism	Acyl-CoA binding domain containing
TRINITY_DN11045_c0_g1	3711.Bra011519.1-P	57.5	5.3e-36	COG5531	B	Chromatin structure and dynamics	SWI SNF related, matrix associated, actin dependent regulator of chromatin, subfamily d, member
TRINITY_DN11059_c0_g1	3847.GLYMA08G42850.1	100	9.8e-10	ENOG410XRMJ	T	Signal transduction mechanisms	calcium-dependent protein kinase
TRINITY_DN11065_c0_g1	39946.BGIOSGA033842-PA	100	6.7e-39	NA	NA	NA	NA
TRINITY_DN11079_c0_g1	4113.PGSC0003DMT400021589	93.4	5e-42	COG1958	K	Transcription	small nuclear ribonucleoprotein
TRINITY_DN11100_c1_g1	4081.Solyc09g098360.2.1	100	1.1e-08	COG2007	J	Translation, ribosomal structure and biogenesis	40S ribosomal protein S8
TRINITY_DN11144_c0_g1	3847.GLYMA15G07760.1	100	3.2e-10	COG5182	A	RNA processing and modification	Splicing factor 3b subunit
TRINITY_DN11148_c0_g1	39946.BGIOSGA012494-PA	100	7.1e-37	COG1643	L	Replication, recombination and repair	helicase
TRINITY_DN11176_c0_g1	39946.BGIOSGA005790-PA	100	4.4e-32	COG0187	L	Replication, recombination and repair	DNA gyrase negatively supercoils closed circular double- stranded DNA in an ATP-dependent manner and also catalyzes the interconversion of other topological isomers of double-stranded DNA rings, including catenanes and knotted rings (By similarity)
TRINITY_DN11176_c0_g1	39946.BGIOSGA005790-PA	100	4.4e-32	COG0188	L	Replication, recombination and repair	DNA gyrase negatively supercoils closed circular double- stranded DNA in an ATP-dependent manner and also catalyzes the interconversion of other topological isomers of double-stranded DNA rings, including catenanes and knotted rings (By similarity)
TRINITY_DN11176_c0_g2	39947.LOC_Os02g47150.1	100	1.1e-29	COG0187	L	Replication, recombination and repair	DNA gyrase negatively supercoils closed circular double- stranded DNA in an ATP-dependent manner and also catalyzes the interconversion of other topological isomers of double-stranded DNA rings, including catenanes and knotted rings (By similarity)
TRINITY_DN11176_c0_g2	39947.LOC_Os02g47150.1	100	1.1e-29	COG0188	L	Replication, recombination and repair	DNA gyrase negatively supercoils closed circular double- stranded DNA in an ATP-dependent manner and also catalyzes the interconversion of other topological isomers of double-stranded DNA rings, including catenanes and knotted rings (By similarity)
TRINITY_DN11178_c0_g1	39946.BGIOSGA020342-PA	100	4.5e-41	COG0115	E	Amino acid transport and metabolism	brancheD-chain amino acid aminotransferase
TRINITY_DN11190_c0_g1	39947.LOC_Os02g47270.1	69.5	4.6e-27	COG2801	L	Replication, recombination and repair	Retrotransposon protein
TRINITY_DN1119_c0_g2	39946.BGIOSGA026777-PA	100	6e-40	COG3200	E	Amino acid transport and metabolism	phospho-2-dehydro-3-deoxyheptonate aldolase
TRINITY_DN11215_c0_g1	39946.BGIOSGA013022-PA	100	5.6e-41	ENOG410XUI5	O	Posttranslational modification, protein turnover, chaperones	Proteasome maturation protein
TRINITY_DN11265_c0_g1	4577.GRMZM2G420576_P01	55.1	4.2e-16	ENOG4111SPB	S	Function unknown	transposon protein
TRINITY_DN11269_c0_g1	3847.GLYMA11G12120.1	100	6.9e-08	COG1269	C	Energy production and conversion	ATPase 116 kDa subunit
TRINITY_DN1131_c0_g1	3694.POPTR_0004s06320.1	88.8	2.7e-35	COG0515	T	Signal transduction mechanisms	Serine Threonine protein kinase
TRINITY_DN11338_c0_g3	7955.ENSDARP00000051183	100	1.1e-35	ENOG410XQHN	S	Function unknown	heterogeneous nuclear ribonucleoprotein
TRINITY_DN11394_c0_g1	7955.ENSDARP00000014491	93.7	9.7e-38	ENOG4111MI6	O	Posttranslational modification, protein turnover, chaperones	cytochrome b-245, alpha polypeptide
TRINITY_DN11397_c0_g1	8090.ENSORLP00000023183	88.5	1.7e-41	COG2092	J	Translation, ribosomal structure and biogenesis	Promotes the exchange of GDP for GTP in EF-1-alpha GDP, thus allowing the regeneration of EF-1-alpha GTP that could then be used to form the ternary complex EF-1-alpha GTP AAtRNA (By similarity)
TRINITY_DN11397_c0_g2	7955.ENSDARP00000065372	92.5	6.5e-15	COG2092	J	Translation, ribosomal structure and biogenesis	Promotes the exchange of GDP for GTP in EF-1-alpha GDP, thus allowing the regeneration of EF-1-alpha GTP that could then be used to form the ternary complex EF-1-alpha GTP AAtRNA (By similarity)
TRINITY_DN11407_c0_g1	3847.GLYMA13G30990.1	100	3.4e-33	ENOG410YQ8J	K	Transcription	Transcription factor
TRINITY_DN11439_c0_g1	3847.GLYMA09G38890.1	100	1.4e-29	ENOG410XPKH	U	Intracellular trafficking, secretion, and vesicular transport	Reticulon
TRINITY_DN11441_c0_g1	39946.BGIOSGA021699-PA	100	2.4e-32	COG5164	K	Transcription	Transcription elongation factor
TRINITY_DN1144_c0_g1	39946.BGIOSGA017932-PA	100	1e-36	COG0014	E	Amino acid transport and metabolism	Catalyzes the NADPH dependent reduction of L-gamma- glutamyl 5-phosphate into L-glutamate 5-semialdehyde and phosphate. The product spontaneously undergoes cyclization to form 1-pyrroline-5-carboxylate (By similarity)
TRINITY_DN1144_c0_g1	39946.BGIOSGA017932-PA	100	1e-36	COG0263	E	Amino acid transport and metabolism	Catalyzes the transfer of a phosphate group to glutamate to form glutamate 5-phosphate which rapidly cyclizes to 5- oxoproline (By similarity)
TRINITY_DN11459_c0_g1	39946.BGIOSGA030457-PA	71	6.4e-37	ENOG410XS4D	S	Function unknown	Retrotransposon protein
TRINITY_DN11470_c0_g1	39946.BGIOSGA028985-PA	100	1.4e-35	ENOG410XPP3	T	Signal transduction mechanisms	Cyclin-Dependent Kinase
TRINITY_DN11493_c0_g2	9685.ENSFCAP00000006303	54	3.7e-10	ENOG410XSGF	S	Function unknown	Nebulin repeat
TRINITY_DN11503_c0_g1	3694.POPTR_0001s34120.1	66.7	3.2e-22	COG0666	S	Function unknown	Ankyrin Repeat
TRINITY_DN11521_c0_g1	39946.BGIOSGA021944-PA	100	4.7e-37	ENOG410XNNY	S	Function unknown	coatomer protein complex, subunit beta 2 (beta prime)
TRINITY_DN11532_c0_g1	8083.ENSXMAP00000003184	71.6	7.2e-26	ENOG410XP9G	T	Signal transduction mechanisms	mitogen-activated protein kinase kinase kinase kinase
TRINITY_DN11536_c0_g1	7955.ENSDARP00000068426	98.5	3.2e-34	ENOG410XQT0	T	Signal transduction mechanisms	receptor, type
TRINITY_DN11546_c0_g1	39946.BGIOSGA036067-PA	100	1.7e-30	COG0236	I	Lipid transport and metabolism	Carrier of the growing fatty acid chain in fatty acid biosynthesis (By similarity)
TRINITY_DN11581_c0_g1	3847.GLYMA05G06080.2	100	4.4e-38	ENOG4111KWC	S	Function unknown	Tetraspanin family
TRINITY_DN11604_c0_g1	39946.BGIOSGA007259-PA	100	2.9e-30	COG0553	L	Replication, recombination and repair	helicase
TRINITY_DN11620_c0_g1	39946.BGIOSGA023590-PA	100	9.3e-38	ENOG410XY86	A	RNA processing and modification	SYF2 homolog, RNA splicing factor (S. cerevisiae)
TRINITY_DN11639_c0_g1	3847.GLYMA12G09600.3	100	7.4e-22	ENOG410Y847	S	Function unknown	NA
TRINITY_DN11640_c0_g1	4538.ORGLA05G0191600.1	100	9.3e-38	ENOG410XSJN	U	Intracellular trafficking, secretion, and vesicular transport	secretory carrier membrane protein
TRINITY_DN11644_c0_g1	7955.ENSDARP00000073318	65.9	1.6e-53	ENOG410ZFJ6	U	Intracellular trafficking, secretion, and vesicular transport	Lectin C-type domain
TRINITY_DN11660_c0_g1	29760.VIT_06s0080g00160.t01	90.2	7.6e-40	ENOG410XRHN	O	Posttranslational modification, protein turnover, chaperones	endosome to lysosome transport via multivesicular body sorting pathway
TRINITY_DN11668_c0_g1	7955.ENSDARP00000038227	100	1.6e-36	COG4281	I	Lipid transport and metabolism	Acyl-CoA binding domain containing
TRINITY_DN11670_c0_g1	7955.ENSDARP00000089361	82.2	5.1e-29	ENOG4111FKI	O	Posttranslational modification, protein turnover, chaperones	Cytochrome
TRINITY_DN11676_c0_g1	39946.BGIOSGA019434-PA	100	6.8e-33	COG0580	G	Carbohydrate transport and metabolism	Channel that permits osmotically driven movement of water in both directions. It is involved in the osmoregulation and in the maintenance of cell turgor during volume expansion in rapidly growing cells. It mediates rapid entry or exit of water in response to abrupt changes in osmolarity (By similarity)
TRINITY_DN11684_c0_g1	7955.ENSDARP00000069405	95	1.3e-22	COG5272	O	Posttranslational modification, protein turnover, chaperones	ubiquitin
TRINITY_DN11701_c0_g1	4896.SPAC4G9.16c.1	67.8	1e-14	COG0097	J	Translation, ribosomal structure and biogenesis	This protein binds to the 23S rRNA, and is important in its secondary structure. It is located near the subunit interface in the base of the L7 L12 stalk, and near the tRNA binding site of the peptidyltransferase center (By similarity)
TRINITY_DN11706_c0_g1	3847.GLYMA13G25870.1	100	6.6e-36	ENOG410YC0U	O	Posttranslational modification, protein turnover, chaperones	Cysteine proteinase inhibitor
TRINITY_DN11711_c0_g3	7955.ENSDARP00000088834	97.4	1.5e-40	ENOG410ZNRC	S	Function unknown	muscleblind-like splicing regulator
TRINITY_DN11745_c1_g1	7955.ENSDARP00000065680	100	3.9e-33	ENOG410XR1E	U	Intracellular trafficking, secretion, and vesicular transport	Matrilin 4
TRINITY_DN11751_c0_g1	29760.VIT_00s0194g00220.t01	52.3	8e-18	ENOG410Z27R	S	Function unknown	NA
TRINITY_DN11752_c0_g1	7955.ENSDARP00000104170	98.5	2.1e-28	ENOG4111J00	S	Function unknown	Akirin 2
TRINITY_DN11773_c0_g1	4113.PGSC0003DMT400004835	77.2	6.1e-112	COG2178	J	Translation, ribosomal structure and biogenesis	translin
TRINITY_DN11774_c0_g1	4577.GRMZM2G138727_P01	100	7.9e-34	ENOG4111CSQ	O	Posttranslational modification, protein turnover, chaperones	Protease inhibitor/seed storage/LTP family
TRINITY_DN11782_c0_g1	3847.GLYMA11G10240.1	100	6.5e-36	ENOG410YDTV	G	Carbohydrate transport and metabolism	expansin-like
TRINITY_DN11804_c0_g1	39946.BGIOSGA024601-PA	100	2.7e-56	ENOG41105ZG	S	Function unknown	Protease inhibitor/seed storage/LTP family
TRINITY_DN11815_c0_g1	29760.VIT_18s0001g13980.t01	76	8.2e-40	ENOG410YQII	S	Function unknown	auxin-responsive protein
TRINITY_DN11819_c0_g1	3711.Bra017917.1-P	81.1	7.7e-42	COG2801	L	Replication, recombination and repair	Retrotransposon protein
TRINITY_DN11822_c0_g1	39946.BGIOSGA021150-PA	100	5.9e-40	ENOG410YY3S	S	Function unknown	- Plant thionin family protein precursor
TRINITY_DN11847_c0_g1	39946.BGIOSGA031748-PA	100	1.2e-41	ENOG410Z3E0	S	Function unknown	DUF1338
TRINITY_DN11856_c0_g2	4641.GSMUA_Achr8P01630_001	67.2	8.2e-22	ENOG410Y3Q0	S	Function unknown	CRAL TRIO domain protein
TRINITY_DN11857_c0_g1	3694.POPTR_0002s04200.1	92.4	8.4e-30	ENOG410YGW0	S	Function unknown	lob domain-containing protein
TRINITY_DN11863_c0_g1	7955.ENSDARP00000044327	92.9	1.2e-34	COG0365	I	Lipid transport and metabolism	Catalyzes the conversion of acetate into acetyl-CoA (AcCoA), an essential intermediate at the junction of anabolic and catabolic pathways. AcsA undergoes a two-step reaction. In the first half reaction, AcsA combines acetate with ATP to form acetyl-adenylate (AcAMP) intermediate. In the second half reaction, it can then transfer the acetyl group from AcAMP to the sulfhydryl group of CoA, forming …
TRINITY_DN11873_c0_g1	3847.GLYMA03G19920.1	100	2.5e-11	ENOG410YR29	S	Function unknown	RPM1-interacting protein
TRINITY_DN11876_c0_g1	9606.ENSP00000318646	100	1.7e-69	COG0096	J	Translation, ribosomal structure and biogenesis	One of the primary rRNA binding proteins, it binds directly to 16S rRNA central domain where it helps coordinate assembly of the platform of the 30S subunit (By similarity)
TRINITY_DN11878_c0_g1	99883.ENSTNIP00000007244	46.7	2.2e-09	NA	NA	NA	NA
TRINITY_DN11894_c0_g3	7955.ENSDARP00000099474	91.5	2.1e-28	COG1498	J	Translation, ribosomal structure and biogenesis	Nucleolar protein
TRINITY_DN11898_c0_g1	3847.GLYMA13G26960.1	100	2.7e-44	ENOG410XPUN	S	Function unknown	annexin A7
TRINITY_DN11898_c1_g1	3847.GLYMA13G26990.1	100	3.6e-25	ENOG410XPUN	S	Function unknown	annexin A7
TRINITY_DN11921_c0_g1	7955.ENSDARP00000094033	64.4	7e-21	ENOG4111XGC	U	Intracellular trafficking, secretion, and vesicular transport	Interleukin 6 receptor
TRINITY_DN11923_c0_g1	7955.ENSDARP00000059013	63.8	6.2e-19	ENOG4111QTT	S	Function unknown	TECPR
TRINITY_DN11926_c0_g1	3847.GLYMA06G13720.1	100	1.1e-35	COG2016	J	Translation, ribosomal structure and biogenesis	Rna-binding protein
TRINITY_DN11932_c0_g1	7955.ENSDARP00000002260	86.1	1.5e-27	ENOG410XNTI	L	Replication, recombination and repair	purine NTP-dependent helicase activity
TRINITY_DN11935_c0_g1	3847.GLYMA19G36990.2	98.9	8.4e-43	COG0149	G	Carbohydrate transport and metabolism	triosephosphate isomerase
TRINITY_DN1193_c0_g1	7955.ENSDARP00000096384	52.2	2.9e-14	COG5599	T	Signal transduction mechanisms	protein tyrosine phosphatase
TRINITY_DN11942_c0_g3	3847.GLYMA05G33790.1	100	3.5e-37	ENOG410XP5G	S	Function unknown	Methyltransferase
TRINITY_DN11953_c0_g1	29760.VIT_12s0059g02770.t01	78.8	1.6e-23	ENOG410XRRT	S	Function unknown	Scarecrow-like protein
TRINITY_DN11954_c0_g1	7955.ENSDARP00000118154	71.4	8.4e-17	COG0515	T	Signal transduction mechanisms	Serine Threonine protein kinase
TRINITY_DN11959_c0_g1	6239.F41H10.8.2	48.1	6e-13	ENOG410XRWT	I	Lipid transport and metabolism	elongation of very long chain fatty acids protein
TRINITY_DN11965_c0_g1	39946.BGIOSGA029466-PA	100	4.4e-31	COG5273	S	Function unknown	Zinc finger, DHHC-type containing
TRINITY_DN11992_c0_g1	3847.GLYMA04G41270.1	65.9	1.3e-07	ENOG410XNN8	S	Function unknown	mRNA transport
TRINITY_DN12011_c0_g1	39946.BGIOSGA007627-PA	100	6.3e-33	COG0509	E	Amino acid transport and metabolism	The glycine cleavage system catalyzes the degradation of glycine. The H protein shuttles the methylamine group of glycine from the P protein to the T protein (By similarity)
TRINITY_DN12016_c0_g1	7955.ENSDARP00000008907	100	3.5e-21	COG0208	F	Nucleotide transport and metabolism	Provides the precursors necessary for DNA synthesis. Catalyzes the biosynthesis of deoxyribonucleotides from the corresponding ribonucleotides (By similarity)
TRINITY_DN12016_c0_g2	39946.BGIOSGA021510-PA	100	2.4e-25	COG0208	F	Nucleotide transport and metabolism	Provides the precursors necessary for DNA synthesis. Catalyzes the biosynthesis of deoxyribonucleotides from the corresponding ribonucleotides (By similarity)
TRINITY_DN12016_c0_g3	7955.ENSDARP00000008907	100	1.2e-31	COG0208	F	Nucleotide transport and metabolism	Provides the precursors necessary for DNA synthesis. Catalyzes the biosynthesis of deoxyribonucleotides from the corresponding ribonucleotides (By similarity)
TRINITY_DN12082_c0_g2	3847.GLYMA06G44340.1	100	3.5e-34	COG5110	O	Posttranslational modification, protein turnover, chaperones	26s proteasome regulatory subunit
TRINITY_DN12098_c0_g1	39947.LOC_Os01g21440.1	100	6.2e-12	NA	NA	NA	NA
TRINITY_DN1209_c0_g1	3847.GLYMA05G37170.1	100	9.6e-38	COG0362	G	Carbohydrate transport and metabolism	Catalyzes the oxidative decarboxylation of 6- phosphogluconate to ribulose 5-phosphate and CO(2), with concomitant reduction of NADP to NADPH (By similarity)
TRINITY_DN12108_c0_g1	7955.ENSDARP00000108712	82.7	6.3e-14	ENOG410XP6N	S	Function unknown	G-protein signaling modulator
TRINITY_DN12124_c0_g1	54126.PPA28952	57.7	1.3e-14	ENOG41117SJ	S	Function unknown	Ground-like domain
TRINITY_DN12140_c0_g2	3847.GLYMA03G28731.1	100	1e-22	NA	NA	NA	NA
TRINITY_DN12142_c0_g1	3847.GLYMA15G03641.1	76.5	5.5e-26	COG0318	I	Lipid transport and metabolism	Amp-dependent synthetase and ligase
TRINITY_DN12142_c0_g1	3847.GLYMA15G03641.1	76.5	5.5e-26	COG0318	Q	Secondary metabolites biosynthesis, transport and catabolism	Amp-dependent synthetase and ligase
TRINITY_DN12145_c0_g1	3694.POPTR_0018s10430.1	68.6	2e-77	COG2340	S	Function unknown	Scp-like extracellular
TRINITY_DN12153_c0_g1	3847.GLYMA04G34370.1	100	4e-35	COG0474	P	Inorganic ion transport and metabolism	P-type atpase
TRINITY_DN12175_c0_g1	3847.GLYMA05G24610.2	100	4.2e-37	ENOG410XP7X	U	Intracellular trafficking, secretion, and vesicular transport	Endoplasmic reticulumgolgi intermediate compartment protein
TRINITY_DN12176_c0_g1	39946.BGIOSGA036552-PA	100	4.9e-40	ENOG410Z7Z7	S	Function unknown	Pentatricopeptide repeat-containing protein
TRINITY_DN12184_c0_g1	7955.ENSDARP00000020578	64	2.2e-07	ENOG410XPXJ	S	Function unknown	adenylyl cyclase-associated protein
TRINITY_DN12192_c0_g1	7955.ENSDARP00000102398	100	6e-34	ENOG410XQ37	J	Translation, ribosomal structure and biogenesis	Component of the eukaryotic translation initiation factor 3 (eIF-3) complex, which is involved in protein synthesis and, together with other initiation factors, stimulates binding of mRNA and methionyl-tRNAi to the 40S ribosome (By similarity)
TRINITY_DN12203_c0_g1	3847.GLYMA05G02631.1	100	3.8e-38	ENOG411245W	S	Function unknown	ubiquitin-associated (UBA) TS-N domain-containing protein octicosapeptide Phox Bemp1 (PB1) domain-containing protein
TRINITY_DN12218_c0_g1	3847.GLYMA03G39170.2	100	2.5e-31	ENOG410Y99W	S	Function unknown	Calmodulin binding protein-like
TRINITY_DN12243_c0_g1	4577.GRMZM2G035890_P01	32	2.4e-54	ENOG410YIXH	S	Function unknown	Ribosome inactivating protein
TRINITY_DN12247_c0_g1	3847.GLYMA14G38337.1	100	1.5e-50	COG0515	T	Signal transduction mechanisms	Serine Threonine protein kinase
TRINITY_DN1224_c0_g2	3847.GLYMA11G31330.1	100	9.2e-62	ENOG410XSIX	O	Posttranslational modification, protein turnover, chaperones	glutathione Stransferase
TRINITY_DN1228_c0_g1	39946.BGIOSGA013859-PA	100	2.1e-14	COG0256	J	Translation, ribosomal structure and biogenesis	This is one of the proteins that binds and probably mediates the attachment of the 5S RNA into the large ribosomal subunit, where it forms part of the central protuberance (By similarity)
TRINITY_DN12309_c0_g2	39946.BGIOSGA009780-PA	100	9.5e-37	COG0058	G	Carbohydrate transport and metabolism	Phosphorylase is an important allosteric enzyme in carbohydrate metabolism. Enzymes from different sources differ in their regulatory mechanisms and in their natural substrates. However, all known phosphorylases share catalytic and structural properties (By similarity)
TRINITY_DN12309_c0_g3	39946.BGIOSGA009780-PA	100	6.1e-24	COG0058	G	Carbohydrate transport and metabolism	Phosphorylase is an important allosteric enzyme in carbohydrate metabolism. Enzymes from different sources differ in their regulatory mechanisms and in their natural substrates. However, all known phosphorylases share catalytic and structural properties (By similarity)
TRINITY_DN12327_c0_g1	9606.ENSP00000340278	100	3.3e-29	COG0693	S	Function unknown	PfpI family
TRINITY_DN12337_c0_g1	3847.GLYMA01G36630.1	100	1.4e-32	COG0515	T	Signal transduction mechanisms	Serine Threonine protein kinase
TRINITY_DN12337_c0_g3	39946.BGIOSGA036572-PA	100	7.9e-36	COG0515	T	Signal transduction mechanisms	Serine Threonine protein kinase
TRINITY_DN1234_c0_g1	10090.ENSMUSP00000032240	100	1.3e-35	ENOG410XPJ1	S	Function unknown	c-type lectin domain family
TRINITY_DN12350_c0_g2	4113.PGSC0003DMT400079642	60.3	5.1e-20	ENOG410Z7Z7	S	Function unknown	Pentatricopeptide repeat-containing protein
TRINITY_DN12353_c0_g1	31033.ENSTRUP00000044101	57.5	1.4e-15	ENOG410XQ96	U	Intracellular trafficking, secretion, and vesicular transport	Lysosomal-associated membrane protein
TRINITY_DN12370_c0_g2	3847.GLYMA04G04500.2	100	1.2e-40	COG0515	T	Signal transduction mechanisms	Serine Threonine protein kinase
TRINITY_DN12373_c0_g1	7955.ENSDARP00000020595	100	5.5e-27	ENOG4111DV3	S	Function unknown	S100 calcium binding protein
TRINITY_DN12373_c0_g2	7955.ENSDARP00000020595	75.7	7.1e-23	ENOG4111DV3	S	Function unknown	S100 calcium binding protein
TRINITY_DN12388_c0_g2	3847.GLYMA10G41970.2	82.1	1.9e-19	ENOG410YP72	S	Function unknown	VQ motif
TRINITY_DN12393_c0_g1	39946.BGIOSGA014811-PA	100	9.5e-44	ENOG410YBMW	S	Function unknown	nucleic acid binding transcription factor activity
TRINITY_DN12413_c0_g1	39946.BGIOSGA037401-PA	100	7.6e-35	ENOG4111S6I	O	Posttranslational modification, protein turnover, chaperones	prefoldin subunit 2
TRINITY_DN12414_c0_g1	39946.BGIOSGA022638-PA	100	1.6e-38	COG0553	L	Replication, recombination and repair	helicase
TRINITY_DN12415_c0_g3	7955.ENSDARP00000024751	100	3.2e-09	ENOG410Y9B3	B	Chromatin structure and dynamics	chromatin modification
TRINITY_DN12417_c0_g1	39946.BGIOSGA007179-PA	100	2.8e-31	COG1196	D	Cell cycle control, cell division, chromosome partitioning	Required for chromosome condensation and partitioning (By similarity)
TRINITY_DN12422_c0_g1	39947.LOC_Os05g51700.1	100	1.5e-34	COG0105	F	Nucleotide transport and metabolism	Major role in the synthesis of nucleoside triphosphates other than ATP. The ATP gamma phosphate is transferred to the NDP beta phosphate via a ping-pong mechanism, using a phosphorylated active-site intermediate (By similarity)
TRINITY_DN12423_c0_g1	9646.ENSAMEP00000017543	98.6	1.8e-32	COG0361	J	Translation, ribosomal structure and biogenesis	however, it seems to stimulate more or less all the activities of the other two initiation factors, IF-2 and IF-3 (By similarity)
TRINITY_DN12428_c0_g2	29760.VIT_08s0040g00390.t01	83.9	8.8e-194	ENOG410XPVQ	H	Coenzyme transport and metabolism	Catalyzes the formation of the isocyclic ring in chlorophyll biosynthesis. Mediates the cyclase reaction, which results in the formation of divinylprotochlorophyllide (Pchlide) characteristic of all chlorophylls from magnesium-protoporphyrin IX 13-monomethyl ester (MgPMME) (By similarity)
TRINITY_DN12434_c0_g1	59689.fgenesh2_kg.302__1__AT2G47270.1	41.8	2.3e-10	ENOG4111CN7	K	Transcription	Transcription factor
TRINITY_DN12448_c0_g2	4538.ORGLA03G0097100.1	100	1.6e-14	ENOG410ZMW4	S	Function unknown	NA
TRINITY_DN12453_c0_g2	7955.ENSDARP00000092488	75.9	2.1e-31	COG1018	C	Energy production and conversion	Is involved in NO detoxification in an aerobic process, termed nitric oxide dioxygenase (NOD) reaction that utilizes O(2) and NAD(P)H to convert NO to nitrate, which protects the bacterium from various noxious nitrogen compounds. Therefore, plays a central role in the inducible response to nitrosative stress (By similarity)
TRINITY_DN12455_c0_g1	7955.ENSDARP00000017878	100	4e-36	ENOG410ZIZB	J	Translation, ribosomal structure and biogenesis	Eukaryotic translation initiation factor 4 gamma
TRINITY_DN12468_c0_g1	29760.VIT_10s0003g05450.t01	61.3	1.1e-19	COG0277	C	Energy production and conversion	FAD linked oxidase domain protein
TRINITY_DN12481_c0_g1	4081.Solyc07g007400.2.1	69	2.7e-08	ENOG410XQ54	S	Function unknown	F-box and leucine-rich repeat protein
TRINITY_DN12486_c0_g1	6334.EFV55023	87.7	4.5e-29	COG5022	Z	Cytoskeleton	myosin heavy chain
TRINITY_DN12497_c0_g1	3847.GLYMA03G30720.1	100	7.4e-17	COG0050	J	Translation, ribosomal structure and biogenesis	This protein promotes the GTP-dependent binding of aminoacyl-tRNA to the A-site of ribosomes during protein biosynthesis (By similarity)
TRINITY_DN124_c0_g1	7955.ENSDARP00000090929	81.5	7.9e-23	COG0204	I	Lipid transport and metabolism	Acyltransferase
TRINITY_DN12501_c0_g1	39946.BGIOSGA025582-PA	100	3.5e-37	ENOG410XQUQ	S	Function unknown	Involved in proper cytoplasmic distribution of mitochondria (By similarity)
TRINITY_DN12512_c0_g1	3694.POPTR_0001s43990.1	58.6	7.8e-08	ENOG410XT6V	S	Function unknown	Indole-3-acetic acid-amido synthetase
TRINITY_DN12530_c0_g1	3847.GLYMA09G04430.1	100	1.2e-38	COG5064	U	Intracellular trafficking, secretion, and vesicular transport	importin subunit alpha
TRINITY_DN12550_c0_g1	7955.ENSDARP00000111799	97.6	7.2e-36	ENOG410XRHN	O	Posttranslational modification, protein turnover, chaperones	endosome to lysosome transport via multivesicular body sorting pathway
TRINITY_DN12554_c0_g1	3847.GLYMA12G05320.1	100	6.1e-23	ENOG4111C1D	S	Function unknown	NA
TRINITY_DN12564_c0_g1	3847.GLYMA02G25300.1	100	2.7e-37	COG0133	E	Amino acid transport and metabolism	The beta subunit is responsible for the synthesis of L- tryptophan from indole and L-serine (By similarity)
TRINITY_DN1256_c0_g1	7955.ENSDARP00000052386	53	1.7e-26	ENOG4110R6N	S	Function unknown	Intelectin 1 (Galactofuranose binding)
TRINITY_DN12577_c0_g1	3847.GLYMA15G17205.1	87.3	5e-22	NA	NA	NA	NA
TRINITY_DN12586_c0_g1	39946.BGIOSGA036516-PA	100	4.9e-36	COG0814	E	Amino acid transport and metabolism	amino acid transport
TRINITY_DN12592_c0_g2	3694.POPTR_0003s00770.1	46.2	7.8e-14	ENOG410XS82	S	Function unknown	Retrotransposon protein
TRINITY_DN12592_c1_g2	39946.BGIOSGA015902-PA	37.5	5.1e-06	COG0410	E	Amino acid transport and metabolism	amino acid transport
TRINITY_DN12592_c1_g2	39946.BGIOSGA015902-PA	37.5	5.1e-06	COG0559	E	Amino acid transport and metabolism	(ABC) transporter
TRINITY_DN12592_c1_g2	39946.BGIOSGA015902-PA	37.5	5.1e-06	COG2814	G	Carbohydrate transport and metabolism	Major Facilitator
TRINITY_DN12592_c1_g2	39946.BGIOSGA015902-PA	37.5	5.1e-06	COG4177	E	Amino acid transport and metabolism	(ABC) transporter
TRINITY_DN12594_c0_g1	9606.ENSP00000382707	100	2.8e-36	ENOG4112C1U	S	Function unknown	Interferon induced transmembrane protein
TRINITY_DN12594_c0_g2	61853.ENSNLEP00000023132	80.2	3e-31	ENOG41113EC	S	Function unknown	Pfam:CD225
TRINITY_DN12594_c0_g3	10090.ENSMUSP00000026565	100	1.1e-38	ENOG4112C1U	S	Function unknown	Interferon induced transmembrane protein
TRINITY_DN12622_c0_g1	3847.GLYMA04G34840.1	100	5e-33	ENOG41125P8	S	Function unknown	B12d protein
TRINITY_DN12633_c0_g1	3694.POPTR_0018s06740.1	64.1	4.7e-15	ENOG410Z4GH	S	Function unknown	nudix (nucleoside diphosphate linked moiety X)-type motif 6
TRINITY_DN12636_c0_g2	31234.CRE14424	86.8	2.6e-35	ENOG410XQGZ	S	Function unknown	guanine nucleotidebinding protein
TRINITY_DN12643_c0_g1	9606.ENSP00000308405	100	7.4e-19	COG5262	B	Chromatin structure and dynamics	histone h2a
TRINITY_DN12653_c0_g1	31033.ENSTRUP00000023279	94	4.1e-23	COG0200	J	Translation, ribosomal structure and biogenesis	Binds to the 23S rRNA (By similarity)
TRINITY_DN12653_c0_g2	31033.ENSTRUP00000023279	94.9	6.4e-31	COG0200	J	Translation, ribosomal structure and biogenesis	Binds to the 23S rRNA (By similarity)
TRINITY_DN12671_c0_g1	39946.BGIOSGA022876-PA	100	3.9e-32	COG0112	E	Amino acid transport and metabolism	Catalyzes the reversible interconversion of serine and glycine with tetrahydrofolate (THF) serving as the one-carbon carrier. This reaction serves as the major source of one-carbon groups required for the biosynthesis of purines, thymidylate, methionine, and other important biomolecules. Also exhibits THF- independent aldolase activity toward beta-hydroxyamino acids, producing glycine and aldehyd…
TRINITY_DN12711_c0_g1	3847.GLYMA20G27620.1	46.1	1.9e-55	COG0515	T	Signal transduction mechanisms	Serine Threonine protein kinase
TRINITY_DN12714_c0_g1	39946.BGIOSGA012122-PA	100	1.4e-45	COG1501	G	Carbohydrate transport and metabolism	hydrolase, family 31
TRINITY_DN12715_c0_g2	3847.GLYMA03G30420.1	100	1.1e-27	NA	NA	NA	NA
TRINITY_DN12720_c0_g1	3847.GLYMA20G25650.1	100	8e-25	COG0671	I	Lipid transport and metabolism	PHOsphatase
TRINITY_DN12734_c0_g1	7955.ENSDARP00000098106	68.4	1.7e-25	ENOG410ZN3C	S	Function unknown	von Willebrand factor A domain containing 7
TRINITY_DN12735_c0_g1	3847.GLYMA08G40060.1	69.3	2.4e-58	ENOG410Y6A1	S	Function unknown	LSM12 homolog (S. cerevisiae)
TRINITY_DN12738_c0_g1	4081.Solyc09g010360.2.1	72	1.1e-138	ENOG410YBPN	S	Function unknown	Auxin-induced protein
TRINITY_DN12765_c0_g1	7955.ENSDARP00000018322	76.1	1.1e-23	ENOG410YPNM	O	Posttranslational modification, protein turnover, chaperones	Baculoviral IAP repeat containing
TRINITY_DN12776_c0_g1	7955.ENSDARP00000069041	93.1	8.7e-30	COG0631	T	Signal transduction mechanisms	Phosphatase
TRINITY_DN12788_c0_g1	9796.ENSECAP00000015167	55.4	7.1e-11	ENOG410XSD2	S	Function unknown	G- protein-coupled receptor
TRINITY_DN12788_c1_g1	10090.ENSMUSP00000004850	100	8.8e-38	ENOG410XSD2	S	Function unknown	G- protein-coupled receptor
TRINITY_DN12791_c0_g1	3711.Bra015746.1-P	61	1.9e-23	ENOG410ZK3M	S	Function unknown	NA
TRINITY_DN12819_c0_g1	4558.Sb04g003900.1	100	1.6e-45	COG1997	J	Translation, ribosomal structure and biogenesis	Ribosomal protein
TRINITY_DN12840_c0_g1	7955.ENSDARP00000102826	63.8	6.7e-30	ENOG410XRSQ	S	Function unknown	Transfer protein
TRINITY_DN12840_c0_g2	31033.ENSTRUP00000047564	68	1.6e-09	ENOG410XRSQ	S	Function unknown	Transfer protein
TRINITY_DN12845_c0_g1	29760.VIT_01s0010g03990.t01	90	5.6e-13	ENOG410YHFS	S	Function unknown	NA
TRINITY_DN12883_c0_g1	7955.ENSDARP00000008454	98.6	4.5e-31	ENOG410XR1Q	T	Signal transduction mechanisms	CDC42 binding protein kinase
TRINITY_DN1289_c0_g1	39946.BGIOSGA020800-PA	100	2.4e-23	ENOG410XSC8	O	Posttranslational modification, protein turnover, chaperones	The proteasome is a multicatalytic proteinase complex which is characterized by its ability to cleave peptides with Arg, Phe, Tyr, Leu, and Glu adjacent to the leaving group at neutral or slightly basic pH. The proteasome has an ATP-dependent proteolytic activity (By similarity)
TRINITY_DN1290_c0_g1	39946.BGIOSGA029356-PA	100	1.5e-46	COG0236	I	Lipid transport and metabolism	Carrier of the growing fatty acid chain in fatty acid biosynthesis (By similarity)
TRINITY_DN12919_c0_g1	39947.LOC_Os01g55190.1	100	1.5e-42	ENOG411248W	S	Function unknown	expressed protein
TRINITY_DN12919_c0_g2	39946.BGIOSGA001496-PA	100	1.7e-43	ENOG410XQAC	S	Function unknown	Katanin p80 (WD repeat containing) subunit B 1
TRINITY_DN12940_c0_g1	3847.GLYMA03G34950.1	100	1.5e-31	COG3588	G	Carbohydrate transport and metabolism	fructose-bisphosphate aldolase
TRINITY_DN12943_c0_g1	39946.BGIOSGA023579-PA	100	1.8e-30	ENOG410XNY0	T	Signal transduction mechanisms	Mitogen-activated protein kinase
TRINITY_DN12944_c0_g1	7955.ENSDARP00000005582	100	1.4e-44	ENOG410Z5PX	S	Function unknown	auxiliary factor
TRINITY_DN12956_c0_g2	29760.VIT_04s0079g00760.t01	100	7.9e-22	ENOG410YCCP	S	Function unknown	member RAS oncogene family
TRINITY_DN12960_c0_g1	9606.ENSP00000270142	100	5.9e-50	COG2032	P	Inorganic ion transport and metabolism	Destroys radicals which are normally produced within the cells and which are toxic to biological systems (By similarity)
TRINITY_DN12962_c0_g1	39946.BGIOSGA006055-PA	100	4.6e-38	COG3040	M	Cell wall/membrane/envelope biogenesis	Outer membrane lipoprotein
TRINITY_DN12965_c0_g1	578458.XP_003033579.1	58.7	7.2e-13	COG0451	M	Cell wall/membrane/envelope biogenesis	Nad-dependent epimerase dehydratase
TRINITY_DN12976_c0_g1	3694.POPTR_0008s13900.1	69.5	8.7e-16	COG5411	T	Signal transduction mechanisms	inositol
TRINITY_DN12979_c0_g1	7955.ENSDARP00000109735	100	8.3e-22	ENOG410XWDZ	S	Function unknown	small EDRK-rich factor
TRINITY_DN12983_c0_g2	39946.BGIOSGA028783-PA	100	1.5e-13	NA	NA	NA	NA
TRINITY_DN12997_c0_g1	3847.GLYMA19G39500.2	67.8	9.5e-107	COG5539	O	Posttranslational modification, protein turnover, chaperones	otu domain-containing protein
TRINITY_DN13003_c0_g1	3694.POPTR_0005s01740.1	56.9	6.8e-61	ENOG4111SY8	S	Function unknown	NA
TRINITY_DN13007_c1_g1	39946.BGIOSGA021705-PA	100	1.4e-38	COG0515	T	Signal transduction mechanisms	Serine Threonine protein kinase
TRINITY_DN13007_c1_g1	39946.BGIOSGA021705-PA	100	1.4e-38	COG4886	S	Function unknown	leucine Rich Repeat
TRINITY_DN13007_c1_g3	39946.BGIOSGA009135-PA	100	1.5e-38	COG0515	T	Signal transduction mechanisms	Serine Threonine protein kinase
TRINITY_DN13007_c1_g3	39946.BGIOSGA009135-PA	100	1.5e-38	COG4886	S	Function unknown	leucine Rich Repeat
TRINITY_DN13017_c0_g1	3847.GLYMA04G43220.1	100	9.5e-44	ENOG410XP9E	S	Function unknown	Oxysterol-binding protein
TRINITY_DN13029_c0_g1	3847.GLYMA12G01291.1	100	3.1e-27	ENOG410XQ1D	U	Intracellular trafficking, secretion, and vesicular transport	Component of the coat protein complex II (COPII) which promotes the formation of transport vesicles from the endoplasmic reticulum (ER). The coat has two main functions, the physical deformation of the endoplasmic reticulum membrane into vesicles and the selection of cargo molecules
TRINITY_DN13048_c0_g2	3847.GLYMA19G35661.1	81.2	1.6e-27	ENOG410XQ37	J	Translation, ribosomal structure and biogenesis	Component of the eukaryotic translation initiation factor 3 (eIF-3) complex, which is involved in protein synthesis and, together with other initiation factors, stimulates binding of mRNA and methionyl-tRNAi to the 40S ribosome (By similarity)
TRINITY_DN13098_c0_g1	3847.GLYMA20G11330.1	100	3.3e-31	COG5077	O	Posttranslational modification, protein turnover, chaperones	ubiquitin carboxyl-terminal hydrolase
TRINITY_DN13109_c0_g1	3847.GLYMA08G18490.1	100	2.6e-34	COG1204	L	Replication, recombination and repair	helicase
TRINITY_DN13116_c0_g1	3694.POPTR_0008s11270.1	80.8	5.7e-68	ENOG4111JMV	S	Function unknown	Acetyltransferase (GNAT) family
TRINITY_DN13118_c0_g1	39946.BGIOSGA026538-PA	98.7	5.3e-33	COG0705	S	Function unknown	rhomboid family
TRINITY_DN13121_c0_g1	3847.GLYMA03G37410.1	100	2.6e-32	COG4677	G	Carbohydrate transport and metabolism	pectinesterase
TRINITY_DN13123_c0_g1	39947.LOC_Os03g26290.1	52.6	3e-15	ENOG410XS4D	S	Function unknown	Retrotransposon protein
TRINITY_DN13135_c0_g1	7955.ENSDARP00000072971	100	8.5e-34	ENOG410ZAWX	O	Posttranslational modification, protein turnover, chaperones	capping protein (actin filament) muscle Z-line, alpha
TRINITY_DN13135_c0_g2	7955.ENSDARP00000072971	97	3.9e-32	ENOG410ZAWX	O	Posttranslational modification, protein turnover, chaperones	capping protein (actin filament) muscle Z-line, alpha
TRINITY_DN13141_c0_g1	7955.ENSDARP00000052687	50.9	4.4e-48	ENOG410ZFKB	S	Function unknown	Anaphylotoxin-like domain
TRINITY_DN13143_c0_g1	39947.LOC_Os06g28390.1	49.1	2.8e-09	COG2801	L	Replication, recombination and repair	Retrotransposon protein
TRINITY_DN13147_c0_g1	7897.ENSLACP00000013199	77.9	3.6e-30	ENOG410XNT2	O	Posttranslational modification, protein turnover, chaperones	solute carrier family 25 (mitochondrial iron transporter), member
TRINITY_DN13147_c0_g2	7955.ENSDARP00000090636	78.9	1.7e-20	ENOG410XNT2	O	Posttranslational modification, protein turnover, chaperones	solute carrier family 25 (mitochondrial iron transporter), member
TRINITY_DN13147_c0_g3	7955.ENSDARP00000090636	97.6	7e-39	ENOG410XNT2	O	Posttranslational modification, protein turnover, chaperones	solute carrier family 25 (mitochondrial iron transporter), member
TRINITY_DN13179_c0_g2	9544.ENSMMUP00000016741	98.1	1.1e-18	COG5374	S	Function unknown	b-cell receptor-associated protein
TRINITY_DN13183_c0_g1	3847.GLYMA11G29720.1	100	3.8e-28	ENOG4112BTF	K	Transcription	WRKY transcription factor
TRINITY_DN13207_c0_g1	29760.VIT_04s0044g01920.t01	52.3	5.1e-09	ENOG410ZJSX	S	Function unknown	protein FAR1-RELATED SEQUENCE 5-like
TRINITY_DN13209_c0_g2	8128.ENSONIP00000021323	82.6	4.9e-22	ENOG410XS17	U	Intracellular trafficking, secretion, and vesicular transport	scavenger receptor class B, member
TRINITY_DN13218_c0_g1	7955.ENSDARP00000094247	100	9.8e-11	COG5176	A	RNA processing and modification	mRNA processing
TRINITY_DN13247_c0_g1	7955.ENSDARP00000037410	97.1	1.7e-30	ENOG410XTJ5	S	Function unknown	RNA binding motif protein
TRINITY_DN13256_c0_g1	339724.XP_001537052.1	56	4.1e-14	ENOG410ZITE	S	Function unknown	DUF895 domain membrane protein
TRINITY_DN13258_c0_g1	8049.ENSGMOP00000013600	51.5	1.8e-08	COG5022	Z	Cytoskeleton	myosin heavy chain
TRINITY_DN13279_c0_g1	3847.GLYMA13G23700.1	100	8.1e-37	COG5225	J	Translation, ribosomal structure and biogenesis	ribosome biogenesis regulatory protein
TRINITY_DN13297_c0_g1	29760.VIT_13s0067g01210.t01	48.2	3.1e-24	ENOG410XQ83	O	Posttranslational modification, protein turnover, chaperones	Anaphase promoting complex subunit 1
TRINITY_DN13342_c0_g1	7955.ENSDARP00000105809	90.2	3.1e-21	COG0372	C	Energy production and conversion	citrate synthase
TRINITY_DN13344_c0_g1	7955.ENSDARP00000015290	44.6	2.2e-12	COG1022	I	Lipid transport and metabolism	Amp-dependent synthetase and ligase
TRINITY_DN13345_c0_g1	39946.BGIOSGA017936-PA	100	2.5e-48	ENOG4111HS3	S	Function unknown	guanylyl cyclase domain containing 1
TRINITY_DN13348_c0_g1	4641.GSMUA_Achr10P11400_001	85.7	2.4e-26	COG0199	J	Translation, ribosomal structure and biogenesis	Binds 16S rRNA, required for the assembly of 30S particles and may also be responsible for determining the conformation of the 16S rRNA at the A site (By similarity)
TRINITY_DN13361_c0_g3	3694.POPTR_0001s34280.1	66.1	3.3e-10	COG1132	V	Defense mechanisms	(ABC) transporter
TRINITY_DN1336_c0_g1	39946.BGIOSGA023420-PA	46.6	1.9e-07	COG0515	T	Signal transduction mechanisms	Serine Threonine protein kinase
TRINITY_DN13372_c0_g1	4577.GRMZM5G898444_P01	100	1.3e-31	NA	NA	NA	NA
TRINITY_DN13380_c0_g1	3847.GLYMA04G42000.1	100	2e-31	COG5164	K	Transcription	Transcription elongation factor
TRINITY_DN13385_c0_g1	3694.POPTR_0008s08930.1	67.6	9.4e-21	ENOG410YK5F	S	Function unknown	NA
TRINITY_DN13388_c0_g1	39946.BGIOSGA009411-PA	100	1.1e-32	ENOG410YCU9	S	Function unknown	inactive poly ADP-ribose polymerase RCD1-like
TRINITY_DN13388_c0_g2	39947.LOC_Os03g63770.1	100	8e-31	ENOG410YCU9	S	Function unknown	inactive poly ADP-ribose polymerase RCD1-like
TRINITY_DN13391_c0_g1	3847.GLYMA13G32500.1	100	2.3e-99	COG2340	S	Function unknown	Scp-like extracellular
TRINITY_DN13396_c0_g1	39946.BGIOSGA037107-PA	94.3	3.9e-30	COG1071	C	Energy production and conversion	Dehydrogenase
TRINITY_DN13401_c0_g1	39946.BGIOSGA014948-PA	100	1.1e-13	COG0330	O	Posttranslational modification, protein turnover, chaperones	Band 7 protein
TRINITY_DN13402_c0_g1	29760.VIT_08s0007g04480.t01	85.7	2.7e-28	COG4677	G	Carbohydrate transport and metabolism	pectinesterase
TRINITY_DN1340_c0_g1	39946.BGIOSGA017451-PA	100	5.4e-32	COG5127	C	Energy production and conversion	ATP hydrolysis coupled proton transport
TRINITY_DN13411_c0_g2	39947.LOC_Os06g09570.1	100	4.5e-28	COG1084	S	Function unknown	Involved in the biogenesis of the 60S ribosomal subunit (By similarity)
TRINITY_DN13411_c0_g3	39947.LOC_Os06g09570.1	100	5.5e-29	COG1084	S	Function unknown	Involved in the biogenesis of the 60S ribosomal subunit (By similarity)
TRINITY_DN13412_c0_g2	39946.BGIOSGA017049-PA	97.3	1.5e-37	ENOG410XQ8I	D	Cell cycle control, cell division, chromosome partitioning	Cell division cycle 20
TRINITY_DN13417_c0_g1	9606.ENSP00000311430	100	6.1e-109	COG0088	J	Translation, ribosomal structure and biogenesis	One of the primary rRNA binding proteins, this protein initially binds near the 5'-end of the 23S rRNA. It is important during the early stages of 50S assembly. It makes multiple contacts with different domains of the 23S rRNA in the assembled 50S subunit and ribosome (By similarity)
TRINITY_DN13440_c0_g1	4113.PGSC0003DMT400047728	59.7	2.1e-21	ENOG410XY93	S	Function unknown	VAMP-like protein
TRINITY_DN13441_c0_g1	39946.BGIOSGA004430-PA	100	2.7e-43	ENOG410YA1S	G	Carbohydrate transport and metabolism	glucan endo-1-3-beta-glucosidase
TRINITY_DN13469_c0_g1	8049.ENSGMOP00000008136	74.6	3.4e-23	ENOG410XPH6	Z	Cytoskeleton	guanine nucleotide exchange factor
TRINITY_DN13472_c0_g1	29760.VIT_16s0050g00710.t01	60.5	2.1e-74	ENOG410YIUI	S	Function unknown	NA
TRINITY_DN13479_c0_g2	3847.GLYMA19G00980.1	100	1.5e-35	COG0451	M	Cell wall/membrane/envelope biogenesis	Nad-dependent epimerase dehydratase
TRINITY_DN13481_c0_g1	3847.GLYMA08G19360.1	100	6.2e-39	COG0076	E	Amino acid transport and metabolism	decarboxylase
TRINITY_DN13482_c0_g1	3847.GLYMA04G37770.1	100	7.6e-32	COG1889	J	Translation, ribosomal structure and biogenesis	Involved in pre-rRNA and tRNA processing. Utilizes the methyl donor S-adenosyl-L-methionine to catalyze the site-specific 2'-hydroxyl methylation of ribose moieties in rRNA and tRNA. Site specificity is provided by a guide RNA that base pairs with the substrate. Methylation occurs at a characteristic distance from the sequence involved in base pairing with the guide RNA (By similarity)
TRINITY_DN13501_c0_g1	7955.ENSDARP00000064973	86.6	3.4e-30	ENOG410XPUN	S	Function unknown	annexin A7
TRINITY_DN13502_c0_g1	3847.GLYMA10G04780.1	90.6	5.6e-09	ENOG41122QJ	C	Energy production and conversion	Stabilizes the interaction between PsaC and the PSI core, assists the docking of the ferredoxin to PSI and interacts with ferredoxin-NADP oxidoreductase (By similarity)
TRINITY_DN13505_c0_g1	3847.GLYMA17G31280.1	100	6.6e-36	ENOG4111V1G	C	Energy production and conversion	component of the ubiquinol-cytochrome c reductase complex (complex III or cytochrome b-c1 complex), which is part of the mitochondrial respiratory chain (By similarity)
TRINITY_DN13563_c0_g1	3847.GLYMA05G02740.1	97.3	3.5e-34	ENOG410XQF2	T	Signal transduction mechanisms	CDC-like kinase
TRINITY_DN13583_c0_g1	39946.BGIOSGA025301-PA	100	1.7e-25	ENOG410XNP1	I	Lipid transport and metabolism	Dehydrogenase
TRINITY_DN13586_c0_g1	7955.ENSDARP00000066972	100	2.3e-33	COG0516	F	Nucleotide transport and metabolism	Catalyzes the conversion of inosine 5'-phosphate (IMP) to xanthosine 5'-phosphate (XMP), the first committed and rate- limiting step in the de novo synthesis of guanine nucleotides, and therefore plays an important role in the regulation of cell growth (By similarity)
TRINITY_DN13586_c0_g1	7955.ENSDARP00000066972	100	2.3e-33	COG0517	S	Function unknown	Catalyzes the conversion of inosine 5'-phosphate (IMP) to xanthosine 5'-phosphate (XMP), the first committed and rate- limiting step in the de novo synthesis of guanine nucleotides, and therefore plays an important role in the regulation of cell growth (By similarity)
TRINITY_DN13594_c0_g1	29760.VIT_05s0062g01150.t01	71.7	3.3e-169	COG0814	E	Amino acid transport and metabolism	amino acid transport
TRINITY_DN13595_c0_g1	3847.GLYMA05G34320.1	100	7.7e-31	COG5116	O	Posttranslational modification, protein turnover, chaperones	26s proteasome
TRINITY_DN13597_c1_g1	9606.ENSP00000257857	100	2.6e-59	ENOG4111IRY	S	Function unknown	tetraspanin
TRINITY_DN13603_c0_g1	39946.BGIOSGA005757-PA	100	8.7e-40	ENOG4111KVI	S	Function unknown	Nuclear matrix constituent protein
TRINITY_DN13603_c0_g2	39946.BGIOSGA005757-PA	100	8.8e-31	ENOG4111KVI	S	Function unknown	Nuclear matrix constituent protein
TRINITY_DN13608_c0_g1	3694.POPTR_0002s26110.1	41.1	2.4e-14	ENOG410YUYP	S	Function unknown	NA
TRINITY_DN13612_c0_g1	7955.ENSDARP00000013110	98.7	2.1e-37	ENOG410YJ1Y	A	RNA processing and modification	Serine arginine-rich splicing factor 11
TRINITY_DN13614_c0_g1	4081.Solyc01g081080.1.1	61.8	5.4e-16	COG0470	L	Replication, recombination and repair	DNA polymerase III subunit delta'
TRINITY_DN13614_c0_g3	29760.VIT_15s0045g00530.t01	63.4	6.5e-25	COG0470	L	Replication, recombination and repair	DNA polymerase III subunit delta'
TRINITY_DN13617_c0_g1	3694.POPTR_0010s10540.1	77.6	2.7e-15	ENOG410YMY7	S	Function unknown	expressed protein
TRINITY_DN13618_c0_g1	9606.ENSP00000334188	100	2.7e-23	COG1730	O	Posttranslational modification, protein turnover, chaperones	Molecular chaperone capable of stabilizing a range of proteins. Seems to fulfill an ATP-independent, HSP70-like function in archaeal de novo protein folding (By similarity)
TRINITY_DN1361_c0_g2	39946.BGIOSGA004954-PA	100	6.7e-33	ENOG410XRWI	U	Intracellular trafficking, secretion, and vesicular transport	Signal-recognition-particle assembly has a crucial role in targeting secretory proteins to the rough endoplasmic reticulum membrane (By similarity)
TRINITY_DN13635_c0_g1	7955.ENSDARP00000104303	100	1.2e-54	ENOG410ZPX7	O	Posttranslational modification, protein turnover, chaperones	Meprin A
TRINITY_DN13638_c0_g1	39947.LOC_Os10g22164.1	39	1.3e-07	NA	NA	NA	NA
TRINITY_DN13650_c0_g1	29760.VIT_00s1241g00010.t01	44.4	2.6e-11	COG5147	K	Transcription	Myblike DNAbinding domain containing protein
TRINITY_DN13652_c0_g1	7955.ENSDARP00000112099	100	7.7e-41	ENOG4111X2K	T	Signal transduction mechanisms	SAP domain
TRINITY_DN1367_c0_g1	9606.ENSP00000230050	100	7.8e-70	COG1358	J	Translation, ribosomal structure and biogenesis	(ribosomal) protein
TRINITY_DN13683_c0_g1	3694.POPTR_0008s09380.1	75.3	3.3e-30	COG2723	G	Carbohydrate transport and metabolism	beta-glucosidase
TRINITY_DN1368_c0_g1	39946.BGIOSGA033768-PA	100	4.4e-27	COG5077	O	Posttranslational modification, protein turnover, chaperones	ubiquitin carboxyl-terminal hydrolase
TRINITY_DN13702_c0_g1	4081.Solyc01g110900.1.1	65	3.7e-29	ENOG410YVUY	S	Function unknown	auxin-induced protein
TRINITY_DN1372_c0_g1	3847.GLYMA09G42160.1	94.4	1.5e-29	ENOG410YDTD	G	Carbohydrate transport and metabolism	peroxidase
TRINITY_DN13734_c0_g2	3847.GLYMA05G34360.1	100	4.1e-35	ENOG410XS2U	O	Posttranslational modification, protein turnover, chaperones	Translocase of outer mitochondrial membrane 40 homolog
TRINITY_DN13744_c0_g1	29760.VIT_14s0066g00720.t01	84.2	1.6e-157	ENOG410XT9X	S	Function unknown	histone H3-K4 methylation
TRINITY_DN13752_c0_g1	54126.PPA06904	81	4.4e-33	COG1471	J	Translation, ribosomal structure and biogenesis	(ribosomal) protein
TRINITY_DN13755_c0_g1	4113.PGSC0003DMT400045310	66.5	2.5e-114	COG3760	S	Function unknown	prolyl-tRNA synthetase
TRINITY_DN13756_c0_g1	30608.ENSMICP00000006594	95.8	6.3e-36	COG1488	H	Coenzyme transport and metabolism	Nicotinate phosphoribosyltransferase
TRINITY_DN13768_c0_g1	4113.PGSC0003DMT400026591	67.5	3.1e-20	ENOG410Z10A	S	Function unknown	NA
TRINITY_DN13771_c0_g1	4558.Sb04g038510.1	100	6.2e-30	ENOG410XQ8V	S	Function unknown	synthase
TRINITY_DN13772_c0_g1	4113.PGSC0003DMT400040445	31.5	1.4e-06	ENOG4111AB6	S	Function unknown	NA
TRINITY_DN13800_c0_g2	39947.LOC_Os02g12120.1	45.1	1.1e-11	COG2801	L	Replication, recombination and repair	Retrotransposon protein
TRINITY_DN13809_c1_g1	39946.BGIOSGA011642-PA	100	9.1e-32	ENOG4110127	S	Function unknown	NA
TRINITY_DN13811_c0_g1	7955.ENSDARP00000009826	91.1	2.1e-13	ENOG410ZZC0	S	Function unknown	negative regulation of nuclear-transcribed mRNA poly(A) tail shortening
TRINITY_DN13824_c0_g1	29760.VIT_09s0002g03140.t01	71.6	5.8e-20	COG3240	S	Function unknown	GDSL esterase lipase
TRINITY_DN13824_c0_g2	29760.VIT_09s0002g03140.t01	89	5.7e-31	COG3240	S	Function unknown	GDSL esterase lipase
TRINITY_DN13826_c0_g1	39946.BGIOSGA030171-PA	100	4e-33	ENOG410XPP8	O	Posttranslational modification, protein turnover, chaperones	Ubiquitin protein ligase E3 component n-recognin 4
TRINITY_DN13826_c0_g2	39946.BGIOSGA030171-PA	98.6	1.9e-16	ENOG410XPP8	O	Posttranslational modification, protein turnover, chaperones	Ubiquitin protein ligase E3 component n-recognin 4
TRINITY_DN13829_c0_g1	29760.VIT_07s0104g00160.t01	96.9	1.5e-26	COG1958	K	Transcription	small nuclear ribonucleoprotein
TRINITY_DN13837_c0_g1	4081.Solyc11g065360.1.1	73.7	6.1e-17	COG1131	V	Defense mechanisms	(ABC) transporter
TRINITY_DN13845_c0_g1	3847.GLYMA13G23740.1	100	4.7e-40	NA	NA	NA	NA
TRINITY_DN13847_c0_g2	7955.ENSDARP00000056212	93.6	1.6e-43	ENOG410XP6R	T	Signal transduction mechanisms	Phosphoinositide-3-kinase, regulatory subunit
TRINITY_DN13847_c0_g5	7955.ENSDARP00000056212	95.7	1.2e-46	ENOG410XP6R	T	Signal transduction mechanisms	Phosphoinositide-3-kinase, regulatory subunit
TRINITY_DN13849_c0_g1	4081.Solyc08g062970.1.1	67.7	2.8e-37	COG0695	O	Posttranslational modification, protein turnover, chaperones	Glutaredoxin
TRINITY_DN13864_c0_g1	9606.ENSP00000354554	93.7	2.7e-126	COG1290	C	Energy production and conversion	Component of the ubiquinol-cytochrome c reductase complex (complex III or cytochrome b-c1 complex), which is a respiratory chain that generates an electrochemical potential coupled to ATP synthesis (By similarity)
TRINITY_DN13864_c0_g2	9606.ENSP00000354554	95.3	3e-50	COG1290	C	Energy production and conversion	Component of the ubiquinol-cytochrome c reductase complex (complex III or cytochrome b-c1 complex), which is a respiratory chain that generates an electrochemical potential coupled to ATP synthesis (By similarity)
TRINITY_DN13864_c0_g4	7955.ENSDARP00000087881	93.9	2.6e-180	COG1290	C	Energy production and conversion	Component of the ubiquinol-cytochrome c reductase complex (complex III or cytochrome b-c1 complex), which is a respiratory chain that generates an electrochemical potential coupled to ATP synthesis (By similarity)
TRINITY_DN13875_c0_g1	29760.VIT_08s0040g01410.t01	79.8	1.5e-45	ENOG41120QE	S	Function unknown	NA
TRINITY_DN13886_c0_g2	3847.GLYMA20G24180.1	100	4.9e-27	ENOG410Z5M3	S	Function unknown	NA
TRINITY_DN13887_c0_g1	4081.Solyc08g075230.1.1	45	1.6e-41	ENOG410YIP0	S	Function unknown	NA
TRINITY_DN13888_c0_g1	4641.GSMUA_Achr8P31080_001	67.5	5.5e-57	ENOG4111TR4	C	Energy production and conversion	etc complex i subunit conserved region
TRINITY_DN13893_c0_g1	7955.ENSDARP00000061671	92.6	8.8e-32	ENOG410XPVR	A	RNA processing and modification	PRP39 pre-mRNA processing factor 39 homolog (S. cerevisiae)
TRINITY_DN13906_c1_g1	29760.VIT_02s0012g00600.t01	74.6	4.7e-50	ENOG4111UCZ	U	Intracellular trafficking, secretion, and vesicular transport	Leptin receptor overlapping
TRINITY_DN13917_c0_g1	29760.VIT_15s0021g00320.t01	50.6	5.7e-10	ENOG4111EDE	S	Function unknown	NA
TRINITY_DN13921_c0_g1	39946.BGIOSGA011389-PA	100	1.2e-33	COG1874	G	Carbohydrate transport and metabolism	beta-galactosidase
TRINITY_DN13933_c0_g1	3847.GLYMA20G34153.1	63.6	2.3e-14	ENOG410ZGWR	S	Function unknown	NA
TRINITY_DN13934_c0_g1	7955.ENSDARP00000124248	81.8	3.7e-42	ENOG4111EA0	S	Function unknown	Lectin, galactoside-binding, soluble
TRINITY_DN13935_c0_g1	3694.POPTR_0008s11790.1	65.6	7.5e-14	ENOG410Z040	S	Function unknown	NA
TRINITY_DN13936_c1_g2	3847.GLYMA20G38590.1	100	6.9e-30	NA	NA	NA	NA
TRINITY_DN13941_c0_g1	7955.ENSDARP00000017420	76.1	4.6e-17	COG0553	L	Replication, recombination and repair	helicase
TRINITY_DN13946_c0_g1	3694.POPTR_0003s07340.1	47.1	2.8e-14	ENOG4111AG7	S	Function unknown	VQ motif
TRINITY_DN13952_c0_g1	39946.BGIOSGA035790-PA	100	4.5e-37	ENOG410Z4SF	S	Function unknown	thaumatin-like protein
TRINITY_DN13957_c0_g1	3847.GLYMA10G04730.2	91.2	1.9e-32	ENOG41122UH	S	Function unknown	dolichyl-phosphate beta-D-mannosyltransferase activity
TRINITY_DN13971_c0_g1	3847.GLYMA09G05490.1	100	2.8e-37	ENOG41105IF	U	Intracellular trafficking, secretion, and vesicular transport	calcium ion binding
TRINITY_DN13978_c0_g1	39946.BGIOSGA007534-PA	100	2.8e-44	ENOG410Y5VT	S	Function unknown	NA
TRINITY_DN13982_c0_g1	9606.ENSP00000221419	100	1.8e-30	ENOG410XQHN	S	Function unknown	heterogeneous nuclear ribonucleoprotein
TRINITY_DN13982_c1_g1	7955.ENSDARP00000051183	100	2.5e-42	ENOG410XQHN	S	Function unknown	heterogeneous nuclear ribonucleoprotein
TRINITY_DN13984_c0_g1	3847.GLYMA10G33650.1	100	2.8e-83	ENOG410XSIX	O	Posttranslational modification, protein turnover, chaperones	glutathione Stransferase
TRINITY_DN13985_c0_g2	3694.POPTR_0017s06920.1	49.2	7.5e-07	NA	NA	NA	NA
TRINITY_DN13996_c0_g2	3847.GLYMA12G33510.1	100	4.8e-30	COG0695	O	Posttranslational modification, protein turnover, chaperones	Glutaredoxin
TRINITY_DN14005_c0_g2	4558.Sb01g046340.1	37.4	3.5e-09	ENOG410Y65V	S	Function unknown	Retrotransposon protein
TRINITY_DN14023_c0_g1	7955.ENSDARP00000037399	94.3	4.4e-34	COG0515	T	Signal transduction mechanisms	Serine Threonine protein kinase
TRINITY_DN14032_c0_g1	4081.Solyc01g107470.2.1	76.8	2.9e-30	ENOG410Z0SB	S	Function unknown	NA
TRINITY_DN1403_c0_g1	3694.POPTR_0008s12670.1	41.2	1.1e-08	ENOG410YPRJ	S	Function unknown	NA
TRINITY_DN14058_c0_g2	3847.GLYMA13G44380.1	100	7.5e-50	COG1905	C	Energy production and conversion	Nadh dehydrogenase
TRINITY_DN14063_c0_g1	9606.ENSP00000378160	100	5e-45	COG2174	J	Translation, ribosomal structure and biogenesis	(ribosomal) protein
TRINITY_DN14063_c0_g2	7955.ENSDARP00000040770	100	9.1e-46	COG2174	J	Translation, ribosomal structure and biogenesis	(ribosomal) protein
TRINITY_DN14063_c0_g3	31033.ENSTRUP00000014783	97.4	9.7e-55	COG2174	J	Translation, ribosomal structure and biogenesis	(ribosomal) protein
TRINITY_DN14070_c0_g1	3847.GLYMA08G08051.1	98.7	1.1e-35	ENOG411219Q	S	Function unknown	Zinc knuckle
TRINITY_DN14076_c0_g1	7955.ENSDARP00000034979	97.2	1.9e-29	ENOG410Y2MB	U	Intracellular trafficking, secretion, and vesicular transport	Syntaxin 5
TRINITY_DN14084_c0_g1	3847.GLYMA14G08960.1	100	2.8e-37	ENOG4111Y8T	S	Function unknown	NA
TRINITY_DN14113_c0_g4	29760.VIT_17s0000g04710.t01	57.6	1.9e-15	ENOG410Z7Z7	S	Function unknown	Pentatricopeptide repeat-containing protein
TRINITY_DN14120_c0_g2	7955.ENSDARP00000119077	100	1.2e-41	ENOG410XRN0	E	Amino acid transport and metabolism	S-adenosylmethionine decarboxylase proenzyme
TRINITY_DN14120_c0_g4	69293.ENSGACP00000008729	90.6	8.2e-09	ENOG410XRN0	E	Amino acid transport and metabolism	S-adenosylmethionine decarboxylase proenzyme
TRINITY_DN14124_c0_g1	7955.ENSDARP00000036317	42.2	1.2e-43	ENOG4111ZQ8	O	Posttranslational modification, protein turnover, chaperones	kininogen 1
TRINITY_DN14143_c0_g1	10090.ENSMUSP00000021668	100	1e-30	ENOG4111Q8S	S	Function unknown	Niemann-Pick disease, type C2
TRINITY_DN1414_c0_g1	39946.BGIOSGA017932-PA	98.7	5e-36	COG0014	E	Amino acid transport and metabolism	Catalyzes the NADPH dependent reduction of L-gamma- glutamyl 5-phosphate into L-glutamate 5-semialdehyde and phosphate. The product spontaneously undergoes cyclization to form 1-pyrroline-5-carboxylate (By similarity)
TRINITY_DN1414_c0_g1	39946.BGIOSGA017932-PA	98.7	5e-36	COG0263	E	Amino acid transport and metabolism	Catalyzes the transfer of a phosphate group to glutamate to form glutamate 5-phosphate which rapidly cyclizes to 5- oxoproline (By similarity)
TRINITY_DN14152_c0_g1	7955.ENSDARP00000060342	97.5	6.2e-37	ENOG410YK57	K	Transcription	pas domain protein
TRINITY_DN14156_c0_g1	7955.ENSDARP00000108460	97.6	1.6e-38	ENOG410XQMX	S	Function unknown	DENN MADD domain containing
TRINITY_DN14158_c0_g1	3847.GLYMA04G39860.1	100	1.3e-33	ENOG410YETZ	G	Carbohydrate transport and metabolism	peroxidase
TRINITY_DN14160_c0_g1	4641.GSMUA_Achr4P24880_001	50.7	3.3e-10	ENOG411058N	S	Function unknown	zinc finger CCCH domain-containing protein
TRINITY_DN14165_c0_g1	3847.GLYMA11G12810.1	100	1.3e-55	ENOG41107F2	S	Function unknown	Protease inhibitor/seed storage/LTP family
TRINITY_DN14169_c0_g1	3711.Bra011568.1-P	60.7	2.4e-48	COG0652	O	Posttranslational modification, protein turnover, chaperones	peptidyl-prolyl cis-trans isomerase activity
TRINITY_DN14181_c0_g1	3847.GLYMA17G16840.1	99	2.9e-53	ENOG411253X	O	Posttranslational modification, protein turnover, chaperones	Cytochrome c oxidase polypeptide VIa
TRINITY_DN14183_c0_g1	4555.Si033270m	92.7	1.1e-13	ENOG410Z9RD	S	Function unknown	May be involved in N-glycosylation through its association with N-oligosaccharyl transferase (By similarity)
TRINITY_DN14196_c0_g1	7955.ENSDARP00000036302	61.9	5.6e-10	ENOG410XSD2	S	Function unknown	G- protein-coupled receptor
TRINITY_DN14196_c0_g3	8128.ENSONIP00000020578	52	3.5e-08	ENOG410XSD2	S	Function unknown	G- protein-coupled receptor
TRINITY_DN14199_c0_g1	4081.Solyc04g080210.1.1	36.7	2.6e-20	ENOG410Z091	S	Function unknown	Pfam:DUF623
TRINITY_DN141_c0_g1	39946.BGIOSGA027915-PA	100	5.5e-34	COG0814	E	Amino acid transport and metabolism	amino acid transport
TRINITY_DN14208_c0_g1	240176.XP_001837196.1	61.4	8.8e-26	ENOG410XNV7	O	Posttranslational modification, protein turnover, chaperones	aspartic
TRINITY_DN14211_c0_g1	7955.ENSDARP00000112194	100	6.1e-37	COG2335	M	Cell wall/membrane/envelope biogenesis	Beta-Ig-H3 fasciclin
TRINITY_DN14214_c0_g1	7955.ENSDARP00000000514	73.5	2.7e-15	COG2268	S	Function unknown	Band 7 protein
TRINITY_DN14216_c0_g1	4538.ORGLA06G0182800.1	68.3	5.4e-08	ENOG410YTD5	S	Function unknown	NA
TRINITY_DN14218_c0_g1	7955.ENSDARP00000095111	100	7.6e-44	COG5126	D	Cell cycle control, cell division, chromosome partitioning	Calcium-binding protein
TRINITY_DN14218_c0_g1	7955.ENSDARP00000095111	100	7.6e-44	COG5126	T	Signal transduction mechanisms	Calcium-binding protein
TRINITY_DN14218_c0_g1	7955.ENSDARP00000095111	100	7.6e-44	COG5126	Z	Cytoskeleton	Calcium-binding protein
TRINITY_DN14226_c0_g1	39947.LOC_Os06g25800.1	50.7	1.9e-11	COG2801	L	Replication, recombination and repair	Retrotransposon protein
TRINITY_DN14230_c0_g1	39946.BGIOSGA002892-PA	100	3.5e-25	COG0443	O	Posttranslational modification, protein turnover, chaperones	Heat shock protein
TRINITY_DN14233_c1_g2	69293.ENSGACP00000006024	100	5.5e-10	ENOG410XP9Y	O	Posttranslational modification, protein turnover, chaperones	RING finger) protein
TRINITY_DN14235_c0_g1	29760.VIT_18s0001g10520.t01	83.8	4.2e-52	ENOG4111SAE	S	Function unknown	sterol binding
TRINITY_DN14246_c0_g1	3847.GLYMA11G03280.1	100	4.2e-32	COG5126	D	Cell cycle control, cell division, chromosome partitioning	Calcium-binding protein
TRINITY_DN14246_c0_g1	3847.GLYMA11G03280.1	100	4.2e-32	COG5126	T	Signal transduction mechanisms	Calcium-binding protein
TRINITY_DN14246_c0_g1	3847.GLYMA11G03280.1	100	4.2e-32	COG5126	Z	Cytoskeleton	Calcium-binding protein
TRINITY_DN14252_c0_g1	3847.GLYMA20G33880.2	100	6.2e-46	COG0605	P	Inorganic ion transport and metabolism	Destroys radicals which are normally produced within the cells and which are toxic to biological systems (By similarity)
TRINITY_DN14258_c1_g1	3847.GLYMA08G22790.1	100	2.1e-34	ENOG4111M8Y	S	Function unknown	CUE domain containing protein
TRINITY_DN1427_c0_g1	9606.ENSP00000339720	100	5.5e-28	ENOG41124SW	U	Intracellular trafficking, secretion, and vesicular transport	NADH dehydrogenase (ubiquinone) 1 alpha subcomplex
TRINITY_DN14282_c0_g1	3847.GLYMA07G36210.1	73.1	1.7e-56	ENOG410YJJA	S	Function unknown	Protein of unknown function, DUF538
TRINITY_DN14286_c0_g1	7955.ENSDARP00000064708	91.8	7.3e-32	COG1249	C	Energy production and conversion	dihydrolipoyl dehydrogenase
TRINITY_DN14291_c0_g1	3847.GLYMA11G14310.1	100	8.1e-54	ENOG410YI8C	T	Signal transduction mechanisms	universal stress protein
TRINITY_DN14295_c0_g1	39946.BGIOSGA006093-PA	100	8e-33	COG0821	I	Lipid transport and metabolism	4-hydroxy-3-methylbut-2-en-1-yl diphosphate synthase activity
TRINITY_DN14300_c0_g1	3847.GLYMA20G32701.1	80	8.9e-11	ENOG4111687	S	Function unknown	DVL family
TRINITY_DN14312_c0_g1	29760.VIT_00s0231g00040.t01	46.1	1.1e-47	ENOG410YR29	S	Function unknown	RPM1-interacting protein
TRINITY_DN14321_c0_g1	3694.POPTR_0002s11680.1	51.9	3.4e-17	ENOG410Z7FJ	S	Function unknown	NA
TRINITY_DN14325_c0_g1	4533.OB05G21100.1	82.7	2.5e-26	ENOG4112428	J	Translation, ribosomal structure and biogenesis	ribosomal protein l29
TRINITY_DN14335_c0_g1	7955.ENSDARP00000039692	93	6.5e-33	COG0647	G	Carbohydrate transport and metabolism	Hydrolase
TRINITY_DN14335_c0_g3	7955.ENSDARP00000039692	93.4	2.3e-33	COG0647	G	Carbohydrate transport and metabolism	Hydrolase
TRINITY_DN1433_c0_g2	9606.ENSP00000346015	100	1e-59	COG0200	J	Translation, ribosomal structure and biogenesis	Binds to the 23S rRNA (By similarity)
TRINITY_DN14342_c0_g1	7955.ENSDARP00000068337	100	3.2e-35	ENOG4111WJP	S	Function unknown	bladder cancer- associated protein
TRINITY_DN14344_c0_g1	5507.FOXG_07461P0	65	5.7e-25	COG0369	P	Inorganic ion transport and metabolism	Component of the sulfite reductase complex that catalyzes the 6-electron reduction of sulfite to sulfide. This is one of several activities required for the biosynthesis of L- cysteine from sulfate. The flavoprotein component catalyzes the electron flow from NADPH - FAD - FMN to the hemoprotein component (By similarity)
TRINITY_DN14361_c0_g1	13684.SNOT_05861	100	1.5e-34	COG0488	S	Function unknown	(ABC) transporter
TRINITY_DN14383_c0_g1	3694.POPTR_0014s02570.1	58.7	1e-12	ENOG410YJ90	S	Function unknown	Transferase family
TRINITY_DN14388_c0_g1	3847.GLYMA03G25790.1	100	7.3e-26	ENOG4111FJ7	A	RNA processing and modification	Mago nashi
TRINITY_DN14396_c0_g1	3847.GLYMA12G15421.1	94.3	9.7e-26	COG1813	K	Transcription	Factor 1
TRINITY_DN143_c0_g1	39946.BGIOSGA012857-PA	100	1.4e-36	ENOG4110801	S	Function unknown	NA
TRINITY_DN14402_c0_g1	7955.ENSDARP00000055503	100	2.2e-39	COG2857	C	Energy production and conversion	cytochrome c1
TRINITY_DN14409_c0_g1	29760.VIT_14s0060g01190.t01	74.6	8.6e-25	ENOG4111NF0	E	Amino acid transport and metabolism	as a sensor for the physiological iron status within the plant, and or might be involved in the transport of iron
TRINITY_DN14409_c0_g2	29760.VIT_14s0060g01190.t01	69.7	4.6e-28	ENOG4111NF0	E	Amino acid transport and metabolism	as a sensor for the physiological iron status within the plant, and or might be involved in the transport of iron
TRINITY_DN14426_c0_g1	39946.BGIOSGA014122-PA	100	1.9e-34	ENOG410XSNC	S	Function unknown	amine oxidase
TRINITY_DN14429_c0_g1	3847.GLYMA16G30190.1	100	1.1e-30	COG1404	O	Posttranslational modification, protein turnover, chaperones	peptidase (S8 and S53, subtilisin, kexin, sedolisin
TRINITY_DN14431_c0_g1	39946.BGIOSGA024736-PA	100	6.1e-31	ENOG410YC7X	S	Function unknown	Frigida-like protein
TRINITY_DN14435_c0_g1	8128.ENSONIP00000023984	98.7	1.3e-37	COG0024	J	Translation, ribosomal structure and biogenesis	Removes the N-terminal methionine from nascent proteins (By similarity)
TRINITY_DN14439_c0_g1	3694.POPTR_0003s00910.1	53.2	1.3e-12	ENOG411153U	S	Function unknown	NA
TRINITY_DN14440_c0_g2	3847.GLYMA07G11720.1	100	6.5e-38	NA	NA	NA	NA
TRINITY_DN14441_c1_g2	29760.VIT_11s0016g01290.t01	66.1	2.7e-14	COG2124	Q	Secondary metabolites biosynthesis, transport and catabolism	Cytochrome p450
TRINITY_DN14450_c0_g1	4081.Solyc02g070070.1.1	66	5e-11	COG0277	C	Energy production and conversion	FAD linked oxidase domain protein
TRINITY_DN14485_c0_g2	7955.ENSDARP00000045310	75	1.9e-35	ENOG4111F8S	U	Intracellular trafficking, secretion, and vesicular transport	synaptogyrin
TRINITY_DN14493_c0_g1	7955.ENSDARP00000058160	97.7	6.4e-43	COG5021	O	Posttranslational modification, protein turnover, chaperones	ubiquitin protein ligase
TRINITY_DN14497_c0_g1	3847.GLYMA07G13710.1	99.3	6.1e-82	COG0105	F	Nucleotide transport and metabolism	Major role in the synthesis of nucleoside triphosphates other than ATP. The ATP gamma phosphate is transferred to the NDP beta phosphate via a ping-pong mechanism, using a phosphorylated active-site intermediate (By similarity)
TRINITY_DN14501_c0_g1	4641.GSMUA_Achr5P07140_001	70.9	1.7e-24	ENOG410XRTN	S	Function unknown	U-box domain-containing protein
TRINITY_DN14504_c0_g1	3847.GLYMA10G41000.3	97.2	1.7e-25	COG2453	T	Signal transduction mechanisms	dual specificity phosphatase
TRINITY_DN14520_c0_g1	3847.GLYMA02G08760.2	55.2	1.5e-09	ENOG410ZQ9A	S	Function unknown	F-box kelch-repeat protein
TRINITY_DN14522_c0_g1	7955.ENSDARP00000108601	100	2.3e-32	COG4870	O	Posttranslational modification, protein turnover, chaperones	cathepsin
TRINITY_DN14522_c0_g2	7955.ENSDARP00000108601	100	6.3e-39	COG4870	O	Posttranslational modification, protein turnover, chaperones	cathepsin
TRINITY_DN14534_c0_g2	39946.BGIOSGA006839-PA	100	1.1e-32	COG4886	S	Function unknown	leucine Rich Repeat
TRINITY_DN14546_c1_g1	3847.GLYMA01G37406.1	100	1.6e-34	COG2940	S	Function unknown	Histone-lysine N-methyltransferase
TRINITY_DN1454_c0_g1	39946.BGIOSGA024701-PA	100	7.9e-63	COG0526	O	Posttranslational modification, protein turnover, chaperones	Thioredoxin
TRINITY_DN14557_c0_g2	39946.BGIOSGA019431-PA	98.8	3.2e-39	ENOG410XPCR	S	Function unknown	ER membrane protein complex subunit 1
TRINITY_DN14564_c0_g1	3694.POPTR_0001s36310.1	68.7	1.7e-41	ENOG411244M	S	Function unknown	Mitochondrial ribosomal protein L54
TRINITY_DN14570_c0_g1	29760.VIT_03s0063g00980.t01	53.8	2.4e-49	ENOG410YPAM	S	Function unknown	Plastocyanin-like domain
TRINITY_DN14571_c0_g1	7955.ENSDARP00000042064	100	1.4e-42	ENOG410XNMM	S	Function unknown	collagen, type
TRINITY_DN14573_c0_g1	29760.VIT_08s0058g01230.t01	57	3.9e-29	ENOG410YT63	U	Intracellular trafficking, secretion, and vesicular transport	Plant non-specific lipid-transfer proteins transfer phospholipids as well as galactolipids across membranes. May play a role in wax or cutin deposition in the cell walls of expanding epidermal cells and certain secretory tissues (By similarity)
TRINITY_DN14575_c0_g1	3847.GLYMA14G08810.1	100	2.5e-32	NA	NA	NA	NA
TRINITY_DN14578_c0_g1	3711.Bra013615.1-P	54.6	5.7e-27	ENOG410Z57I	S	Function unknown	NA
TRINITY_DN14581_c0_g2	3694.POPTR_0003s12010.1	60.3	7.9e-16	COG1404	O	Posttranslational modification, protein turnover, chaperones	peptidase (S8 and S53, subtilisin, kexin, sedolisin
TRINITY_DN14590_c0_g1	3847.GLYMA05G20710.1	100	7.2e-06	ENOG410YIPU	K	Transcription	Transcription factor
TRINITY_DN14591_c0_g1	29760.VIT_07s0205g00010.t01	53.4	1.3e-27	ENOG410XWC4	S	Function unknown	hydroxyproline-rich glycoprotein
TRINITY_DN14598_c0_g1	7955.ENSDARP00000075419	59.4	1e-19	COG5173	U	Intracellular trafficking, secretion, and vesicular transport	Exocyst complex component
TRINITY_DN14619_c0_g1	69293.ENSGACP00000009620	93.8	9.9e-17	ENOG410XRI7	T	Signal transduction mechanisms	Phosphodiesterase
TRINITY_DN14624_c0_g1	29760.VIT_14s0081g00600.t01	80	4.1e-39	ENOG41126S1	S	Function unknown	C-Myc binding protein
TRINITY_DN14626_c1_g1	3847.GLYMA20G34820.1	100	4.7e-33	ENOG410Z25M	S	Function unknown	inhibitor
TRINITY_DN14639_c0_g1	7955.ENSDARP00000096527	74.7	1.9e-28	COG4886	S	Function unknown	leucine Rich Repeat
TRINITY_DN14641_c0_g1	7955.ENSDARP00000108264	59.4	2.7e-26	COG5640	O	Posttranslational modification, protein turnover, chaperones	protease
TRINITY_DN14641_c0_g2	7955.ENSDARP00000108264	70.1	4.4e-23	COG5640	O	Posttranslational modification, protein turnover, chaperones	protease
TRINITY_DN1464_c0_g1	4558.Sb08g018270.1	100	2.4e-27	ENOG410XRZ8	S	Function unknown	Prefoldin, subunit
TRINITY_DN14658_c0_g1	3847.GLYMA19G00550.1	100	1.6e-33	ENOG410ZGFF	S	Function unknown	altered inheritance of mitochondria protein
TRINITY_DN14660_c0_g1	269798.CHU_1781	45.5	1.1e-09	COG0277	C	Energy production and conversion	FAD linked oxidase domain protein
TRINITY_DN14670_c0_g1	31033.ENSTRUP00000047832	87.9	4.7e-106	COG1622	C	Energy production and conversion	Subunits I and II form the functional core of the enzyme complex. Electrons originating in cytochrome c are transferred via heme a and Cu(A) to the binuclear center formed by heme a3 and Cu(B) (By similarity)
TRINITY_DN14670_c0_g2	7955.ENSDARP00000087872	95.2	3.7e-105	COG1622	C	Energy production and conversion	Subunits I and II form the functional core of the enzyme complex. Electrons originating in cytochrome c are transferred via heme a and Cu(A) to the binuclear center formed by heme a3 and Cu(B) (By similarity)
TRINITY_DN14670_c0_g3	31033.ENSTRUP00000047832	86.1	1.5e-104	COG1622	C	Energy production and conversion	Subunits I and II form the functional core of the enzyme complex. Electrons originating in cytochrome c are transferred via heme a and Cu(A) to the binuclear center formed by heme a3 and Cu(B) (By similarity)
TRINITY_DN14670_c0_g4	10090.ENSMUSP00000080994	91.8	1.5e-92	COG1622	C	Energy production and conversion	Subunits I and II form the functional core of the enzyme complex. Electrons originating in cytochrome c are transferred via heme a and Cu(A) to the binuclear center formed by heme a3 and Cu(B) (By similarity)
TRINITY_DN14670_c0_g5	10116.ENSRNOP00000046414	91.6	1.7e-82	COG1622	C	Energy production and conversion	Subunits I and II form the functional core of the enzyme complex. Electrons originating in cytochrome c are transferred via heme a and Cu(A) to the binuclear center formed by heme a3 and Cu(B) (By similarity)
TRINITY_DN14674_c0_g2	4513.MLOC_16669.1	69.8	5.4e-13	COG2801	L	Replication, recombination and repair	Retrotransposon protein
TRINITY_DN14680_c0_g1	486041.XP_001878593.1	80.5	5.9e-46	COG0023	J	Translation, ribosomal structure and biogenesis	translation initiation factor
TRINITY_DN14681_c0_g3	4533.OB02G31420.1	71.8	6.7e-83	COG0515	T	Signal transduction mechanisms	Serine Threonine protein kinase
TRINITY_DN14681_c0_g3	4533.OB02G31420.1	71.8	6.7e-83	COG4886	S	Function unknown	leucine Rich Repeat
TRINITY_DN14682_c0_g1	8083.ENSXMAP00000015462	88.6	3.5e-35	COG0666	S	Function unknown	Ankyrin Repeat
TRINITY_DN14685_c0_g2	4577.GRMZM2G568664_P01	79.7	1.8e-27	COG2801	L	Replication, recombination and repair	Retrotransposon protein
TRINITY_DN14688_c0_g1	7955.ENSDARP00000116417	94.1	2.8e-30	ENOG410XRE3	S	Function unknown	guanyl-nucleotide exchange factor activity
TRINITY_DN14694_c0_g1	7955.ENSDARP00000072092	100	7.4e-38	ENOG4111PGK	K	Transcription	inhibitor of DNA binding 2, dominant negative helix-loop-helix protein
TRINITY_DN14700_c0_g1	4081.Solyc03g081330.1.1	47.8	1.6e-09	ENOG411173Q	S	Function unknown	Avr9 Cf-9 rapidly elicited protein 65
TRINITY_DN14708_c0_g1	7955.ENSDARP00000089263	98.8	7.2e-39	COG5069	Z	Cytoskeleton	Microtubule associated monoxygenase, calponin and LIM domain containing
TRINITY_DN14722_c0_g1	3847.GLYMA10G35280.2	98.7	3.1e-33	COG0814	E	Amino acid transport and metabolism	amino acid transport
TRINITY_DN14725_c0_g1	4081.Solyc04g014240.1.1	75.2	2.4e-127	ENOG410Y5NG	K	Transcription	Mediator of RNA polymerase II transcription subunit
TRINITY_DN14726_c1_g1	3847.GLYMA15G00581.1	100	1.6e-28	COG0515	T	Signal transduction mechanisms	Serine Threonine protein kinase
TRINITY_DN14728_c0_g1	10090.ENSMUSP00000102078	100	9.4e-115	COG0450	O	Posttranslational modification, protein turnover, chaperones	alkyl hydroperoxide reductase
TRINITY_DN14732_c0_g1	9606.ENSP00000365025	100	3.2e-40	COG5041	D	Cell cycle control, cell division, chromosome partitioning	casein kinase ii
TRINITY_DN14732_c0_g1	9606.ENSP00000365025	100	3.2e-40	COG5041	K	Transcription	casein kinase ii
TRINITY_DN14732_c0_g1	9606.ENSP00000365025	100	3.2e-40	COG5041	T	Signal transduction mechanisms	casein kinase ii
TRINITY_DN14733_c0_g1	29760.VIT_19s0014g01770.t01	58.1	3.1e-06	ENOG410XQQV	S	Function unknown	glutamate receptor
TRINITY_DN14735_c0_g1	29760.VIT_04s0044g01970.t01	75.9	0	COG1404	O	Posttranslational modification, protein turnover, chaperones	peptidase (S8 and S53, subtilisin, kexin, sedolisin
TRINITY_DN14738_c0_g1	29760.VIT_01s0011g00210.t01	70.7	3e-50	COG5274	C	Energy production and conversion	cytochrome b5
TRINITY_DN14738_c0_g1	29760.VIT_01s0011g00210.t01	70.7	3e-50	COG5274	I	Lipid transport and metabolism	cytochrome b5
TRINITY_DN14745_c0_g1	39946.BGIOSGA004053-PA	100	1.3e-36	ENOG410YGHF	S	Function unknown	XH XS domain-containing protein
TRINITY_DN14746_c1_g2	7955.ENSDARP00000064035	39	6.4e-08	COG5640	O	Posttranslational modification, protein turnover, chaperones	protease
TRINITY_DN14767_c0_g1	7955.ENSDARP00000037399	92.1	1.8e-40	COG0515	T	Signal transduction mechanisms	Serine Threonine protein kinase
TRINITY_DN14770_c0_g1	39946.BGIOSGA017105-PA	100	8.1e-30	COG5307	S	Function unknown	and Sec7 domain
TRINITY_DN14773_c0_g1	3847.GLYMA06G02290.1	100	5.5e-42	COG0019	E	Amino acid transport and metabolism	Specifically catalyzes the decarboxylation of meso- diaminopimelate (meso-DAP) to L-lysine (By similarity)
TRINITY_DN14777_c0_g1	7955.ENSDARP00000115796	100	3.3e-30	COG2053	J	Translation, ribosomal structure and biogenesis	Ribosomal protein
TRINITY_DN14777_c0_g2	7955.ENSDARP00000115796	100	3.3e-30	COG2053	J	Translation, ribosomal structure and biogenesis	Ribosomal protein
TRINITY_DN14777_c0_g3	8083.ENSXMAP00000013972	100	8.5e-30	COG2053	J	Translation, ribosomal structure and biogenesis	Ribosomal protein
TRINITY_DN14785_c0_g2	7955.ENSDARP00000066759	100	1.1e-31	COG0459	O	Posttranslational modification, protein turnover, chaperones	Prevents misfolding and promotes the refolding and proper assembly of unfolded polypeptides generated under stress conditions (By similarity)
TRINITY_DN14785_c0_g3	7955.ENSDARP00000066759	100	5.1e-33	COG0459	O	Posttranslational modification, protein turnover, chaperones	Prevents misfolding and promotes the refolding and proper assembly of unfolded polypeptides generated under stress conditions (By similarity)
TRINITY_DN14787_c0_g1	99883.ENSTNIP00000015362	91.5	2e-26	COG1601	J	Translation, ribosomal structure and biogenesis	translation Initiation Factor
TRINITY_DN14787_c0_g2	7955.ENSDARP00000020566	98.8	1.9e-43	COG1601	J	Translation, ribosomal structure and biogenesis	translation Initiation Factor
TRINITY_DN14814_c1_g1	4513.MLOC_58492.1	82.4	5.7e-24	ENOG41122RA	S	Function unknown	LSM14A, SCD6 homolog A (S. cerevisiae)
TRINITY_DN14817_c0_g1	3847.GLYMA05G36160.1	100	2.9e-52	COG2097	J	Translation, ribosomal structure and biogenesis	(ribosomal) protein
TRINITY_DN14819_c0_g1	3694.POPTR_0011s07370.1	72.1	1.8e-17	ENOG410YGSV	S	Function unknown	Curculin-like mannose-binding lectin family protein
TRINITY_DN14826_c0_g1	7955.ENSDARP00000069745	92.8	9.3e-29	ENOG410XP60	U	Intracellular trafficking, secretion, and vesicular transport	integrin, beta
TRINITY_DN14850_c0_g1	29760.VIT_08s0007g02380.t01	63	8.5e-17	COG0542	O	Posttranslational modification, protein turnover, chaperones	ATP-dependent CLP protease ATP-binding subunit
TRINITY_DN14850_c0_g2	3694.POPTR_0016s07250.1	93.1	2.4e-27	COG0542	O	Posttranslational modification, protein turnover, chaperones	ATP-dependent CLP protease ATP-binding subunit
TRINITY_DN14856_c0_g1	4081.Solyc01g066690.2.1	94.9	9.1e-12	COG5257	J	Translation, ribosomal structure and biogenesis	translation initiation factor
TRINITY_DN14871_c0_g1	3847.GLYMA03G25200.2	91.5	2.8e-29	ENOG4111AXA	S	Function unknown	Protein of unknown function (DUF581)
TRINITY_DN14872_c0_g1	5306.JGI71820	55.1	1.5e-13	ENOG410Y9MH	S	Function unknown	NA
TRINITY_DN14881_c0_g1	8128.ENSONIP00000010236	96.7	6e-44	COG5022	Z	Cytoskeleton	myosin heavy chain
TRINITY_DN14881_c0_g2	8364.ENSXETP00000000487	70.7	1.3e-06	COG5022	Z	Cytoskeleton	myosin heavy chain
TRINITY_DN14886_c0_g2	7668.SPU_020006tr	66.7	9.5e-32	COG0554	C	Energy production and conversion	Key enzyme in the regulation of glycerol uptake and metabolism (By similarity)
TRINITY_DN14891_c0_g1	3847.GLYMA13G22940.1	100	1.6e-11	ENOG410YKTH	S	Function unknown	AAI
TRINITY_DN14896_c0_g1	39946.BGIOSGA021784-PA	100	1.5e-22	COG2167	J	Translation, ribosomal structure and biogenesis	Ribosomal protein
TRINITY_DN14899_c0_g2	29760.VIT_17s0000g04710.t01	64	4.5e-25	ENOG410Z7Z7	S	Function unknown	Pentatricopeptide repeat-containing protein
TRINITY_DN14901_c0_g1	39946.BGIOSGA021341-PA	100	1.6e-28	ENOG4111Q2V	O	Posttranslational modification, protein turnover, chaperones	Thioredoxin domain containing 17
TRINITY_DN14907_c0_g2	4113.PGSC0003DMT400096648	51.4	2e-13	ENOG410YJRW	S	Function unknown	NA
TRINITY_DN14915_c0_g1	39946.BGIOSGA030429-PA	100	1.6e-28	ENOG410ZSH4	S	Function unknown	RNA splicing
TRINITY_DN14919_c0_g1	3847.GLYMA09G30260.1	100	2.3e-32	ENOG410YZVQ	S	Function unknown	NA
TRINITY_DN14925_c0_g1	8090.ENSORLP00000011626	65.2	2.5e-18	COG0724	S	Function unknown	Rna-binding protein
TRINITY_DN14931_c0_g1	4081.Solyc12g009540.1.1	67	1.9e-26	ENOG410XS4D	S	Function unknown	Retrotransposon protein
TRINITY_DN14931_c0_g3	4081.Solyc11g062200.1.1	56.9	4.3e-30	ENOG410XS4D	S	Function unknown	Retrotransposon protein
TRINITY_DN14931_c0_g4	4113.PGSC0003DMT400076165	54.5	7.2e-18	COG2801	L	Replication, recombination and repair	Retrotransposon protein
TRINITY_DN14934_c0_g1	39946.BGIOSGA019990-PA	100	4.5e-55	COG5051	J	Translation, ribosomal structure and biogenesis	60S ribosomal protein l36
TRINITY_DN14937_c0_g1	7955.ENSDARP00000028333	96.7	1.3e-06	ENOG4111K8B	O	Posttranslational modification, protein turnover, chaperones	growth arrest and DNA-damage-inducible, beta
TRINITY_DN14941_c0_g1	29760.VIT_03s0088g00650.t01	81.2	3.6e-146	ENOG410YAEJ	G	Carbohydrate transport and metabolism	xyloglucan endotransglucosylase hydrolase protein
TRINITY_DN14945_c0_g2	7955.ENSDARP00000031677	94.4	1.4e-27	ENOG410XQX6	S	Function unknown	Rhophilin, Rho GTPase binding protein
TRINITY_DN14950_c0_g1	4081.Solyc03g097670.2.1	66.7	1.1e-21	ENOG4111N59	S	Function unknown	NA
TRINITY_DN14952_c0_g1	3847.GLYMA10G40461.1	98.6	1.4e-36	COG0199	J	Translation, ribosomal structure and biogenesis	Binds 16S rRNA, required for the assembly of 30S particles and may also be responsible for determining the conformation of the 16S rRNA at the A site (By similarity)
TRINITY_DN14953_c0_g1	3694.POPTR_0022s00510.1	40.2	4.8e-15	ENOG41119QF	S	Function unknown	NA
TRINITY_DN14957_c0_g1	3847.GLYMA08G21380.1	97.6	5.8e-38	COG0612	O	Posttranslational modification, protein turnover, chaperones	peptidase'
TRINITY_DN14963_c0_g1	3847.GLYMA04G08540.1	98.5	4.8e-30	COG5193	J	Translation, ribosomal structure and biogenesis	La ribonucleoprotein domain family member
TRINITY_DN14963_c0_g1	3847.GLYMA04G08540.1	98.5	4.8e-30	COG5193	O	Posttranslational modification, protein turnover, chaperones	La ribonucleoprotein domain family member
TRINITY_DN14978_c0_g2	29760.VIT_14s0066g00600.t01	63.6	7.9e-16	ENOG411155J	S	Function unknown	NA
TRINITY_DN14986_c0_g1	7955.ENSDARP00000090929	97.4	4.1e-41	COG0204	I	Lipid transport and metabolism	Acyltransferase
TRINITY_DN14986_c0_g2	7955.ENSDARP00000090929	95.6	2.4e-29	COG0204	I	Lipid transport and metabolism	Acyltransferase
TRINITY_DN14988_c0_g1	7955.ENSDARP00000052760	100	1.2e-21	COG2167	J	Translation, ribosomal structure and biogenesis	Ribosomal protein
TRINITY_DN14991_c0_g2	7955.ENSDARP00000049650	97.6	8.3e-40	COG5069	Z	Cytoskeleton	Microtubule associated monoxygenase, calponin and LIM domain containing
TRINITY_DN14999_c0_g1	39946.BGIOSGA029463-PA	100	1.1e-53	NA	NA	NA	NA
TRINITY_DN15005_c0_g1	39946.BGIOSGA022790-PA	100	8.7e-23	NA	NA	NA	NA
TRINITY_DN15010_c0_g1	7955.ENSDARP00000023121	100	3.2e-52	COG0039	C	Energy production and conversion	Catalyzes the reversible oxidation of malate to oxaloacetate (By similarity)
TRINITY_DN15020_c0_g1	3694.POPTR_0015s05440.1	69.9	1.1e-129	ENOG410YTP2	S	Function unknown	NA
TRINITY_DN15038_c0_g1	3847.GLYMA13G19871.1	96.4	2e-19	COG5641	K	Transcription	Transcription factor
TRINITY_DN15040_c0_g1	7955.ENSDARP00000119542	79.7	9.6e-30	COG5021	O	Posttranslational modification, protein turnover, chaperones	ubiquitin protein ligase
TRINITY_DN15040_c0_g1	7955.ENSDARP00000119542	79.7	9.6e-30	COG5184	D	Cell cycle control, cell division, chromosome partitioning	regulator of chromosome condensation
TRINITY_DN15040_c0_g1	7955.ENSDARP00000119542	79.7	9.6e-30	COG5184	Z	Cytoskeleton	regulator of chromosome condensation
TRINITY_DN15048_c0_g1	29760.VIT_07s0005g00050.t01	71.1	7.6e-25	COG2608	S	Function unknown	heavy metal transport detoxification protein
TRINITY_DN1504_c0_g1	39946.BGIOSGA012620-PA	100	6.3e-40	COG1161	S	Function unknown	Required for a late step of 50S ribosomal subunit assembly. Has GTPase activity (By similarity)
TRINITY_DN15063_c0_g1	39946.BGIOSGA001884-PA	100	5.2e-32	COG5096	U	Intracellular trafficking, secretion, and vesicular transport	The coatomer is a cytosolic protein complex that binds to dilysine motifs and reversibly associates with Golgi non- clathrin-coated vesicles, which further mediate biosynthetic protein transport from the ER, via the Golgi up to the trans Golgi network. Coatomer complex is required for budding from Golgi membranes, and is essential for the retrograde Golgi-to-ER transport of dilysine-tagged protei…
TRINITY_DN15063_c0_g2	39946.BGIOSGA034416-PA	100	6.4e-37	COG5096	U	Intracellular trafficking, secretion, and vesicular transport	The coatomer is a cytosolic protein complex that binds to dilysine motifs and reversibly associates with Golgi non- clathrin-coated vesicles, which further mediate biosynthetic protein transport from the ER, via the Golgi up to the trans Golgi network. Coatomer complex is required for budding from Golgi membranes, and is essential for the retrograde Golgi-to-ER transport of dilysine-tagged protei…
TRINITY_DN15063_c0_g3	39946.BGIOSGA001884-PA	100	1.9e-32	COG5096	U	Intracellular trafficking, secretion, and vesicular transport	The coatomer is a cytosolic protein complex that binds to dilysine motifs and reversibly associates with Golgi non- clathrin-coated vesicles, which further mediate biosynthetic protein transport from the ER, via the Golgi up to the trans Golgi network. Coatomer complex is required for budding from Golgi membranes, and is essential for the retrograde Golgi-to-ER transport of dilysine-tagged protei…
TRINITY_DN15064_c0_g1	4113.PGSC0003DMT400080606	80.6	4.9e-76	ENOG4111M5Q	S	Function unknown	universal stress protein
TRINITY_DN15065_c0_g1	39946.BGIOSGA007452-PA	100	4.4e-22	ENOG41114AV	S	Function unknown	NA
TRINITY_DN15065_c0_g2	39946.BGIOSGA016149-PA	97.7	7.3e-16	ENOG41114AV	S	Function unknown	NA
TRINITY_DN15065_c0_g3	39947.LOC_Os08g28010.1	100	3.2e-38	ENOG41114AV	S	Function unknown	NA
TRINITY_DN15065_c0_g4	39946.BGIOSGA016149-PA	95.9	8e-31	ENOG41114AV	S	Function unknown	NA
TRINITY_DN15075_c0_g1	4081.Solyc02g093710.1.1	41.7	2.4e-31	ENOG410YW3V	S	Function unknown	NA
TRINITY_DN15078_c0_g1	4081.Solyc09g014660.1.1	50.8	3.9e-08	ENOG4111AFN	S	Function unknown	NA
TRINITY_DN15079_c0_g1	7955.ENSDARP00000003468	100	7.5e-34	ENOG410XPXR	O	Posttranslational modification, protein turnover, chaperones	t-complex protein 1
TRINITY_DN15083_c0_g1	3847.GLYMA09G02870.1	100	3e-43	COG0012	J	Translation, ribosomal structure and biogenesis	gtp-binding protein
TRINITY_DN15089_c0_g1	29760.VIT_01s0011g06140.t01	61.9	4.7e-151	ENOG410Y3P9	O	Posttranslational modification, protein turnover, chaperones	Ubox domain-containing protein
TRINITY_DN15091_c0_g1	3847.GLYMA19G44780.1	100	1.8e-33	COG5274	C	Energy production and conversion	cytochrome b5
TRINITY_DN15091_c0_g1	3847.GLYMA19G44780.1	100	1.8e-33	COG5274	I	Lipid transport and metabolism	cytochrome b5
TRINITY_DN15092_c0_g1	39946.BGIOSGA014312-PA	100	3.2e-36	ENOG410Y9JN	S	Function unknown	expressed protein
TRINITY_DN15099_c0_g1	3847.GLYMA02G42671.1	100	1.2e-30	ENOG4111WJ7	U	Intracellular trafficking, secretion, and vesicular transport	protein transport protein sec61
TRINITY_DN15100_c0_g1	3847.GLYMA14G00720.1	99.1	1.9e-52	ENOG410YBWT	M	Cell wall/membrane/envelope biogenesis	Fasciclin-like arabinogalactan protein
TRINITY_DN15105_c1_g1	7955.ENSDARP00000058554	100	7.9e-56	ENOG410ZYQJ	L	Replication, recombination and repair	TAR DNA binding protein
TRINITY_DN15106_c0_g1	9258.ENSOANP00000011740	100	5.8e-07	ENOG410XP7S	S	Function unknown	ELAV (embryonic lethal, abnormal vision, Drosophila)-like
TRINITY_DN15114_c0_g1	4113.PGSC0003DMT400035329	71.5	1.6e-57	ENOG410Z28U	S	Function unknown	auxin-induced protein
TRINITY_DN15131_c0_g1	4113.PGSC0003DMT400003549	36.4	3.5e-07	ENOG41116TG	S	Function unknown	NA
TRINITY_DN15133_c0_g1	4577.GRMZM2G420576_P01	54.5	2e-19	ENOG4111SPB	S	Function unknown	transposon protein
TRINITY_DN15140_c0_g1	281687.CJA04889a	66.7	1.6e-22	COG1501	G	Carbohydrate transport and metabolism	hydrolase, family 31
TRINITY_DN15143_c0_g1	29760.VIT_18s0001g05040.t01	67.9	8.6e-39	ENOG410YRT5	S	Function unknown	Pollen-specific protein
TRINITY_DN15147_c0_g1	3847.GLYMA03G36840.3	78.4	1e-38	COG0695	O	Posttranslational modification, protein turnover, chaperones	Glutaredoxin
TRINITY_DN15151_c0_g1	3847.GLYMA04G42130.1	100	1.1e-33	ENOG410YFUQ	S	Function unknown	NA
TRINITY_DN15162_c0_g5	39947.LOC_Os03g05850.1	63.2	7.9e-43	ENOG410XS4D	S	Function unknown	Retrotransposon protein
TRINITY_DN15162_c0_g6	15368.BRADI1G43020.1	60.2	1.2e-22	ENOG410XS4D	S	Function unknown	Retrotransposon protein
TRINITY_DN15162_c0_g7	15368.BRADI1G43550.1	55.9	1.2e-15	COG2801	L	Replication, recombination and repair	Retrotransposon protein
TRINITY_DN15163_c0_g1	3711.Bra014208.1-P	53	8.2e-14	COG4886	S	Function unknown	leucine Rich Repeat
TRINITY_DN15163_c0_g2	29760.VIT_12s0028g03390.t01	50	1.3e-11	ENOG4111BJ0	S	Function unknown	Leucine-rich repeAt
TRINITY_DN15169_c0_g3	39947.LOC_Os11g20760.1	36.8	3e-08	ENOG410Y65V	S	Function unknown	Retrotransposon protein
TRINITY_DN15180_c0_g1	39947.LOC_Os10g27230.1	98.8	1.8e-42	COG5239	A	RNA processing and modification	Ccr4-NOT transcription complex, subunit
TRINITY_DN15181_c0_g1	29760.VIT_08s0007g03190.t01	75.7	1.7e-39	ENOG410YSBX	L	Replication, recombination and repair	DNA replication
TRINITY_DN15188_c0_g1	29760.VIT_01s0011g06230.t01	65.3	1.5e-75	ENOG4111FKI	O	Posttranslational modification, protein turnover, chaperones	Cytochrome
TRINITY_DN15191_c0_g1	3847.GLYMA10G29210.1	100	3e-44	ENOG410Y8QT	S	Function unknown	Hypoxia-responsive family
TRINITY_DN15195_c0_g1	3847.GLYMA04G38010.1	100	4.4e-41	COG1525	L	Replication, recombination and repair	nuclease
TRINITY_DN15196_c0_g1	29760.VIT_09s0002g01750.t01	59.4	2.2e-30	ENOG4111AYC	S	Function unknown	Domain of unknown function (DUF3511)
TRINITY_DN15197_c0_g2	29760.VIT_09s0002g05290.t01	67.5	2.6e-24	COG3491	S	Function unknown	2OGFe(II) oxygenase
TRINITY_DN15203_c0_g1	4081.Solyc10g085010.1.1	61	4e-49	ENOG410YH1N	S	Function unknown	PAR1 protein
TRINITY_DN15207_c0_g1	3694.POPTR_0012s02920.1	53.1	1e-06	ENOG41104YW	S	Function unknown	NA
TRINITY_DN15208_c0_g1	29760.VIT_10s0116g00090.t01	63.6	4.4e-67	ENOG410Z7Z7	S	Function unknown	Pentatricopeptide repeat-containing protein
TRINITY_DN15212_c0_g1	3847.GLYMA10G02090.2	100	5.9e-48	ENOG410XS0C	S	Function unknown	NA
TRINITY_DN15213_c0_g2	3694.POPTR_0003s15060.1	41.5	1.5e-28	ENOG4111416	K	Transcription	Transcription factor
TRINITY_DN15223_c0_g1	7955.ENSDARP00000074862	100	2.5e-48	COG0724	S	Function unknown	Rna-binding protein
TRINITY_DN15224_c1_g1	7955.ENSDARP00000105328	100	7.3e-48	COG4830	J	Translation, ribosomal structure and biogenesis	Ribosomal protein
TRINITY_DN15224_c1_g2	7955.ENSDARP00000105328	100	5.8e-51	COG4830	J	Translation, ribosomal structure and biogenesis	Ribosomal protein
TRINITY_DN15224_c1_g3	7955.ENSDARP00000105328	99.1	5.6e-55	COG4830	J	Translation, ribosomal structure and biogenesis	Ribosomal protein
TRINITY_DN15229_c0_g1	3847.GLYMA12G32190.1	100	3e-30	ENOG410XXC3	S	Function unknown	peroxisome biogenesis protein 22-like
TRINITY_DN1522_c0_g1	3847.GLYMA17G14170.1	100	9.7e-34	COG1088	M	Cell wall/membrane/envelope biogenesis	dTDP-glucose 4-6-dehydratase
TRINITY_DN15237_c0_g1	4113.PGSC0003DMT400073811	58.9	6e-51	ENOG410YWNR	S	Function unknown	cell wall vacuolar inhibitor of fructosidase
TRINITY_DN15237_c0_g2	4113.PGSC0003DMT400073811	58.2	2.8e-53	ENOG410YWNR	S	Function unknown	cell wall vacuolar inhibitor of fructosidase
TRINITY_DN1523_c0_g1	39946.BGIOSGA007432-PA	100	6.6e-29	ENOG410XPYN	S	Function unknown	glycopeptide alpha-N-acetylgalactosaminidase activity
TRINITY_DN15249_c0_g3	39946.BGIOSGA024630-PA	100	1.4e-51	ENOG410XP5G	S	Function unknown	Methyltransferase
TRINITY_DN15254_c0_g1	7955.ENSDARP00000004830	100	3.7e-33	ENOG4111VAU	O	Posttranslational modification, protein turnover, chaperones	glutathione Stransferase
TRINITY_DN15257_c0_g1	7955.ENSDARP00000113097	94.5	3.5e-08	NA	NA	NA	NA
TRINITY_DN15260_c0_g1	29760.VIT_02s0154g00320.t01	60.6	1.9e-37	ENOG410ZMQE	S	Function unknown	14 kDa proline-rich protein DC2.15-like
TRINITY_DN15264_c0_g1	39947.LOC_Os01g59990.1	100	1.8e-64	COG2075	J	Translation, ribosomal structure and biogenesis	Ribosomal protein
TRINITY_DN15269_c0_g1	3847.GLYMA02G46540.1	80	1.6e-25	ENOG41121M0	C	Energy production and conversion	ATPase, H transporting, lysosomal 9kDa, V0 subunit e1
TRINITY_DN15271_c0_g1	39946.BGIOSGA010567-PA	100	4.2e-48	ENOG410Z1VV	U	Intracellular trafficking, secretion, and vesicular transport	trafficking protein particle complex
TRINITY_DN15272_c0_g1	7955.ENSDARP00000074112	76.4	1.8e-22	COG5048	S	Function unknown	Zinc finger protein
TRINITY_DN15274_c0_g2	7955.ENSDARP00000027695	100	4.3e-42	COG5257	J	Translation, ribosomal structure and biogenesis	translation initiation factor
TRINITY_DN15274_c0_g3	7955.ENSDARP00000027695	100	2.6e-38	COG5257	J	Translation, ribosomal structure and biogenesis	translation initiation factor
TRINITY_DN15279_c0_g1	3847.GLYMA05G25460.1	46.6	4.8e-09	COG0277	C	Energy production and conversion	FAD linked oxidase domain protein
TRINITY_DN15280_c0_g2	4577.GRMZM5G836222_P02	100	4e-30	ENOG4111UWC	S	Function unknown	zinc finger
TRINITY_DN15284_c0_g1	61853.ENSNLEP00000002733	87.5	6.2e-16	NA	NA	NA	NA
TRINITY_DN15285_c0_g1	7955.ENSDARP00000019813	79.1	1.2e-54	ENOG41123KC	J	Translation, ribosomal structure and biogenesis	40s ribosomal protein s30
TRINITY_DN15291_c0_g1	3847.GLYMA09G38590.1	78.3	1.1e-41	ENOG41121RP	S	Function unknown	zinc finger
TRINITY_DN15292_c0_g1	3847.GLYMA05G27090.1	100	4.6e-17	ENOG410ZR2A	S	Function unknown	Transmembrane protein 214
TRINITY_DN15300_c0_g3	59689.scaffold_701130.1	84.6	1.2e-20	COG2940	S	Function unknown	Histone-lysine N-methyltransferase
TRINITY_DN15307_c0_g1	6238.CBG14284	70.7	5.8e-16	COG0401	S	Function unknown	hydrophobic protein
TRINITY_DN15315_c0_g1	7955.ENSDARP00000112233	49.6	2.8e-22	COG4826	O	Posttranslational modification, protein turnover, chaperones	serine-type endopeptidase inhibitor activity
TRINITY_DN15315_c0_g2	8090.ENSORLP00000019898	60	5.3e-20	COG4826	O	Posttranslational modification, protein turnover, chaperones	serine-type endopeptidase inhibitor activity
TRINITY_DN15315_c0_g3	8128.ENSONIP00000001504	63	3.8e-13	COG4826	O	Posttranslational modification, protein turnover, chaperones	serine-type endopeptidase inhibitor activity
TRINITY_DN15323_c0_g1	486041.XP_001883806.1	78.8	6.9e-21	ENOG410XNTI	L	Replication, recombination and repair	purine NTP-dependent helicase activity
TRINITY_DN15324_c1_g2	15368.BRADI3G08410.1	86.7	1.9e-06	ENOG410XZYE	S	Function unknown	Far upstream element (FUSE) binding protein
TRINITY_DN15325_c0_g1	10116.ENSRNOP00000026580	96.4	4.2e-39	ENOG410XQ96	U	Intracellular trafficking, secretion, and vesicular transport	Lysosomal-associated membrane protein
TRINITY_DN15326_c0_g1	4558.Sb01g036490.1	100	6.1e-33	ENOG410YCDX	S	Function unknown	zinc finger CCCH domain-containing protein
TRINITY_DN15328_c0_g2	4113.PGSC0003DMT400023454	56.7	5.2e-16	ENOG41114F2	S	Function unknown	Lipase (class 3)
TRINITY_DN15334_c0_g1	3847.GLYMA13G29291.1	95.9	1.4e-34	ENOG4111UT0	O	Posttranslational modification, protein turnover, chaperones	Ubiquitin-like protein
TRINITY_DN15335_c0_g1	39947.LOC_Os03g52310.1	100	1.3e-33	ENOG410Y37V	S	Function unknown	transposon protein
TRINITY_DN15335_c0_g2	39947.LOC_Os03g52310.1	100	1.1e-33	ENOG410Y37V	S	Function unknown	transposon protein
TRINITY_DN15339_c0_g1	7955.ENSDARP00000099277	89.1	2e-22	ENOG4112428	J	Translation, ribosomal structure and biogenesis	ribosomal protein l29
TRINITY_DN15339_c0_g2	7955.ENSDARP00000099277	100	5.5e-28	ENOG4112428	J	Translation, ribosomal structure and biogenesis	ribosomal protein l29
TRINITY_DN15339_c0_g3	9544.ENSMMUP00000031977	97.7	1.7e-62	ENOG4112428	J	Translation, ribosomal structure and biogenesis	ribosomal protein l29
TRINITY_DN15339_c0_g4	8083.ENSXMAP00000017660	91.5	5e-23	ENOG4112428	J	Translation, ribosomal structure and biogenesis	ribosomal protein l29
TRINITY_DN15345_c0_g1	4081.Solyc10g080350.1.1	55.4	8.6e-21	COG0086	K	Transcription	DNA-dependent RNA polymerase catalyzes the transcription of DNA into RNA using the four ribonucleoside triphosphates as substrates (By similarity)
TRINITY_DN15349_c0_g1	29760.VIT_17s0000g04620.t01	80.9	5.1e-50	ENOG4111TND	K	Transcription	mediator of RNA polymerase II transcription, subunit 11
TRINITY_DN15350_c0_g1	3694.POPTR_0008s20130.1	64.7	9.8e-100	ENOG4111NAQ	S	Function unknown	Phosphatase
TRINITY_DN15351_c0_g1	7955.ENSDARP00000067081	100	1.4e-57	ENOG4111J5K	U	Intracellular trafficking, secretion, and vesicular transport	clathrin light chain
TRINITY_DN15353_c0_g2	7955.ENSDARP00000103723	50.8	5.6e-08	ENOG4112BQP	U	Intracellular trafficking, secretion, and vesicular transport	colony stimulating factor 2 receptor, beta, low-affinity (granulocyte-macrophage)
TRINITY_DN15354_c0_g1	9606.ENSP00000341538	100	6.8e-30	ENOG4111WJ7	U	Intracellular trafficking, secretion, and vesicular transport	protein transport protein sec61
TRINITY_DN15357_c0_g1	29760.VIT_07s0151g00740.t01	60.2	7.2e-43	ENOG4111902	S	Function unknown	Protease inhibitor/seed storage/LTP family
TRINITY_DN15358_c0_g1	7955.ENSDARP00000071646	100	2.3e-46	ENOG410ZYS4	S	Function unknown	fibrinogen
TRINITY_DN15363_c0_g1	3847.GLYMA20G30590.1	100	4.9e-10	COG0532	J	Translation, ribosomal structure and biogenesis	One of the essential components for the initiation of protein synthesis. Protects formylmethionyl-tRNA from spontaneous hydrolysis and promotes its binding to the 30S ribosomal subunits. Also involved in the hydrolysis of GTP during the formation of the 70S ribosomal complex (By similarity)
TRINITY_DN15363_c0_g2	3847.GLYMA10G37020.1	100	1.1e-35	COG0532	J	Translation, ribosomal structure and biogenesis	One of the essential components for the initiation of protein synthesis. Protects formylmethionyl-tRNA from spontaneous hydrolysis and promotes its binding to the 30S ribosomal subunits. Also involved in the hydrolysis of GTP during the formation of the 70S ribosomal complex (By similarity)
TRINITY_DN15368_c0_g2	3847.GLYMA08G12940.1	98.5	1.8e-29	ENOG410YCKV	S	Function unknown	function DUF1296 domain containing protein, expressed
TRINITY_DN15371_c0_g1	3847.GLYMA10G03250.2	98.5	8.9e-28	NA	NA	NA	NA
TRINITY_DN15372_c0_g2	7955.ENSDARP00000084514	89.9	1.5e-38	ENOG410XQZC	S	Function unknown	Sema domain, immunoglobulin domain (Ig), transmembrane domain (TM) and short cytoplasmic domain, (Semaphorin)
TRINITY_DN15374_c0_g1	4081.Solyc09g005740.1.1	52.2	5.6e-85	ENOG4111WQ2	S	Function unknown	chloroplast lumen common family protein
TRINITY_DN15378_c0_g3	7955.ENSDARP00000024129	96.8	1.1e-25	ENOG410XNP7	J	Translation, ribosomal structure and biogenesis	formation of translation preinitiation complex
TRINITY_DN15380_c0_g1	29760.VIT_07s0151g00530.t01	62.9	3.3e-29	ENOG410XVRY	S	Function unknown	NA
TRINITY_DN15387_c0_g1	8049.ENSGMOP00000008036	68.6	6.5e-06	COG0666	S	Function unknown	Ankyrin Repeat
TRINITY_DN15390_c0_g1	7955.ENSDARP00000037789	96.9	4.9e-50	COG5048	S	Function unknown	Zinc finger protein
TRINITY_DN15394_c0_g1	3847.GLYMA13G16570.1	100	1.3e-30	COG0513	L	Replication, recombination and repair	purine NTP-dependent helicase activity
TRINITY_DN15395_c0_g1	7955.ENSDARP00000092745	82.6	6e-41	ENOG4111P0H	S	Function unknown	Immunoglobulin C1-set domain
TRINITY_DN15396_c0_g1	8083.ENSXMAP00000014859	100	7.3e-22	ENOG410XRSP	S	Function unknown	Leucine zipper-ef-hand containing transmembrane protein
TRINITY_DN15398_c0_g1	29760.VIT_00s0187g00040.t01	47.5	5.1e-18	ENOG410YZDC	O	Posttranslational modification, protein turnover, chaperones	Cysteine proteinase inhibitor
TRINITY_DN15399_c0_g1	4555.Si012162m	64	7.1e-50	COG0507	L	Replication, recombination and repair	exodeoxyribonuclease v alpha
TRINITY_DN15406_c0_g1	4081.Solyc01g109290.2.1	72.9	1.7e-107	ENOG410XNZZ	S	Function unknown	methyltransferase like 13
TRINITY_DN15409_c0_g1	39946.BGIOSGA032845-PA	100	1.4e-32	COG0436	E	Amino acid transport and metabolism	aminotransferase
TRINITY_DN15426_c0_g1	3847.GLYMA01G38410.1	100	1.8e-38	COG0006	E	Amino acid transport and metabolism	peptidase M24
TRINITY_DN15428_c0_g4	486041.XP_001873859.1	56.2	9.2e-17	ENOG4111ZNA	S	Function unknown	NA
TRINITY_DN15429_c0_g1	7955.ENSDARP00000066721	100	3.1e-42	ENOG4111PFV	S	Function unknown	Polyadenylate-binding protein
TRINITY_DN15436_c0_g1	9606.ENSP00000268668	100	5.6e-31	ENOG4111MMM	I	Lipid transport and metabolism	NADH dehydrogenase (ubiquinone) 1 beta subcomplex
TRINITY_DN15440_c0_g1	3847.GLYMA07G30160.1	100	1.1e-39	ENOG4111WHQ	S	Function unknown	CHCH domain
TRINITY_DN15443_c0_g2	4113.PGSC0003DMT400062222	67.6	2.9e-31	ENOG410YWKP	S	Function unknown	NA
TRINITY_DN15446_c0_g1	7955.ENSDARP00000109194	100	4.2e-27	COG1498	J	Translation, ribosomal structure and biogenesis	Nucleolar protein
TRINITY_DN15449_c0_g2	29760.VIT_14s0108g00600.t01	70	5.8e-30	ENOG410Z7Z7	S	Function unknown	Pentatricopeptide repeat-containing protein
TRINITY_DN15458_c0_g2	7955.ENSDARP00000046586	100	7.3e-38	ENOG410XPFS	U	Intracellular trafficking, secretion, and vesicular transport	Adaptor-related protein complex
TRINITY_DN15471_c0_g1	9646.ENSAMEP00000011554	100	1.7e-13	COG0553	L	Replication, recombination and repair	helicase
TRINITY_DN15471_c0_g1	9646.ENSAMEP00000011554	100	1.7e-13	COG5076	B	Chromatin structure and dynamics	bromodomain
TRINITY_DN15471_c0_g1	9646.ENSAMEP00000011554	100	1.7e-13	COG5076	K	Transcription	bromodomain
TRINITY_DN15484_c0_g1	7955.ENSDARP00000011487	100	1.6e-36	COG5078	O	Posttranslational modification, protein turnover, chaperones	ubiquitin-conjugating enzyme
TRINITY_DN15485_c0_g1	4081.Solyc01g099890.2.1	69.7	2.1e-84	COG2016	J	Translation, ribosomal structure and biogenesis	Rna-binding protein
TRINITY_DN15486_c0_g2	7955.ENSDARP00000025466	98.6	8.5e-30	COG0459	O	Posttranslational modification, protein turnover, chaperones	Prevents misfolding and promotes the refolding and proper assembly of unfolded polypeptides generated under stress conditions (By similarity)
TRINITY_DN15488_c0_g1	29760.VIT_08s0040g02450.t01	68.6	2.7e-61	ENOG4112CW3	S	Function unknown	NA
TRINITY_DN15490_c0_g1	3847.GLYMA03G31691.1	100	7.1e-42	COG2124	Q	Secondary metabolites biosynthesis, transport and catabolism	Cytochrome p450
TRINITY_DN15491_c1_g1	39946.BGIOSGA036501-PA	100	8.2e-40	ENOG4111FR6	S	Function unknown	GDP-D-glucose phosphorylase
TRINITY_DN15491_c1_g2	7955.ENSDARP00000100461	72.8	8.1e-115	ENOG410ZPX7	O	Posttranslational modification, protein turnover, chaperones	Meprin A
TRINITY_DN15496_c0_g1	7955.ENSDARP00000102398	100	1.2e-34	ENOG410XQ37	J	Translation, ribosomal structure and biogenesis	Component of the eukaryotic translation initiation factor 3 (eIF-3) complex, which is involved in protein synthesis and, together with other initiation factors, stimulates binding of mRNA and methionyl-tRNAi to the 40S ribosome (By similarity)
TRINITY_DN15497_c0_g1	8049.ENSGMOP00000010398	91.4	1e-30	ENOG41105KN	S	Function unknown	Heterogeneous nuclear ribonucleoprotein M
TRINITY_DN15501_c0_g2	3847.GLYMA13G10130.1	100	7.3e-33	ENOG410XSC8	O	Posttranslational modification, protein turnover, chaperones	The proteasome is a multicatalytic proteinase complex which is characterized by its ability to cleave peptides with Arg, Phe, Tyr, Leu, and Glu adjacent to the leaving group at neutral or slightly basic pH. The proteasome has an ATP-dependent proteolytic activity (By similarity)
TRINITY_DN15502_c0_g3	7955.ENSDARP00000017792	97.1	1.2e-33	ENOG410XQ3E	J	Translation, ribosomal structure and biogenesis	Component of the eukaryotic translation initiation factor 3 (eIF-3) complex, which is involved in protein synthesis and, together with other initiation factors, stimulates binding of mRNA and methionyl-tRNAi to the 40S ribosome (By similarity)
TRINITY_DN15503_c0_g1	39947.LOC_Os07g22800.1	40	1e-07	COG2801	L	Replication, recombination and repair	Retrotransposon protein
TRINITY_DN15509_c0_g1	7955.ENSDARP00000046972	100	2.3e-42	ENOG410ZAWX	O	Posttranslational modification, protein turnover, chaperones	capping protein (actin filament) muscle Z-line, alpha
TRINITY_DN15526_c0_g1	3847.GLYMA01G05740.1	100	1.1e-58	COG2174	J	Translation, ribosomal structure and biogenesis	(ribosomal) protein
TRINITY_DN15527_c0_g1	578458.XP_003038802.1	67.7	4.5e-19	COG5048	S	Function unknown	Zinc finger protein
TRINITY_DN15533_c0_g2	3847.GLYMA08G41220.4	97.1	2.1e-36	ENOG410YD4N	S	Function unknown	Methyltransferase
TRINITY_DN15543_c0_g1	8128.ENSONIP00000006910	80.2	1.7e-32	COG0513	L	Replication, recombination and repair	purine NTP-dependent helicase activity
TRINITY_DN15543_c0_g5	8128.ENSONIP00000006910	76.7	2.5e-31	COG0513	L	Replication, recombination and repair	purine NTP-dependent helicase activity
TRINITY_DN15548_c0_g1	4641.GSMUA_Achr3P13390_001	91.4	1.1e-23	COG2167	J	Translation, ribosomal structure and biogenesis	Ribosomal protein
TRINITY_DN15549_c0_g1	7955.ENSDARP00000024752	100	3.3e-99	COG0480	J	Translation, ribosomal structure and biogenesis	Catalyzes the GTP-dependent ribosomal translocation step during translation elongation. During this step, the ribosome changes from the pre-translocational (PRE) to the post- translocational (POST) state as the newly formed A-site-bound peptidyl-tRNA and P-site-bound deacylated tRNA move to the P and E sites, respectively. Catalyzes the coordinated movement of the two tRNA molecules, the mRNA and…
TRINITY_DN15549_c0_g2	7955.ENSDARP00000024752	100	7e-42	COG0480	J	Translation, ribosomal structure and biogenesis	Catalyzes the GTP-dependent ribosomal translocation step during translation elongation. During this step, the ribosome changes from the pre-translocational (PRE) to the post- translocational (POST) state as the newly formed A-site-bound peptidyl-tRNA and P-site-bound deacylated tRNA move to the P and E sites, respectively. Catalyzes the coordinated movement of the two tRNA molecules, the mRNA and…
TRINITY_DN1554_c0_g1	7955.ENSDARP00000065384	92	7.1e-06	ENOG410YWNC	K	Transcription	Nuclear receptor subfamily 4, group A, member
TRINITY_DN15553_c0_g1	3847.GLYMA14G39300.1	100	5.9e-34	ENOG410Y3P9	O	Posttranslational modification, protein turnover, chaperones	Ubox domain-containing protein
TRINITY_DN15556_c0_g1	3694.POPTR_0001s45510.1	83.8	1.1e-81	COG0080	J	Translation, ribosomal structure and biogenesis	This protein binds directly to 23S ribosomal RNA (By similarity)
TRINITY_DN15563_c0_g1	7955.ENSDARP00000051361	100	3.2e-42	COG5022	Z	Cytoskeleton	myosin heavy chain
TRINITY_DN15566_c0_g3	29760.VIT_11s0016g05390.t01	77.8	4.5e-34	COG0257	J	Translation, ribosomal structure and biogenesis	50S ribosomal protein L36
TRINITY_DN15576_c0_g2	7955.ENSDARP00000003744	100	5.4e-36	COG0443	O	Posttranslational modification, protein turnover, chaperones	Heat shock protein
TRINITY_DN15577_c0_g1	39946.BGIOSGA007302-PA	100	2.2e-33	COG0369	P	Inorganic ion transport and metabolism	Component of the sulfite reductase complex that catalyzes the 6-electron reduction of sulfite to sulfide. This is one of several activities required for the biosynthesis of L- cysteine from sulfate. The flavoprotein component catalyzes the electron flow from NADPH - FAD - FMN to the hemoprotein component (By similarity)
TRINITY_DN15586_c0_g1	3847.GLYMA16G00590.1	100	1.1e-39	COG0508	C	Energy production and conversion	Dehydrogenase
TRINITY_DN15586_c0_g3	3847.GLYMA16G00590.1	100	2.3e-35	COG0508	C	Energy production and conversion	Dehydrogenase
TRINITY_DN15587_c0_g2	39946.BGIOSGA022638-PA	100	8.7e-33	COG0553	L	Replication, recombination and repair	helicase
TRINITY_DN15587_c0_g3	39946.BGIOSGA022638-PA	100	3.6e-31	COG0553	L	Replication, recombination and repair	helicase
TRINITY_DN15589_c0_g1	7955.ENSDARP00000067444	84.9	4.7e-30	COG0814	E	Amino acid transport and metabolism	amino acid transport
TRINITY_DN15589_c0_g4	7955.ENSDARP00000067444	95.7	9.9e-31	COG0814	E	Amino acid transport and metabolism	amino acid transport
TRINITY_DN15590_c0_g1	3847.GLYMA01G41721.1	100	6.5e-40	ENOG410YJ5A	S	Function unknown	Agenet domain
TRINITY_DN15602_c0_g1	39946.BGIOSGA021716-PA	100	6.6e-34	ENOG4111EZQ	S	Function unknown	smr domain containing protein
TRINITY_DN15605_c0_g1	39946.BGIOSGA012197-PA	100	9.2e-33	COG0656	S	Function unknown	reductase
TRINITY_DN15606_c0_g1	7955.ENSDARP00000070807	98.5	8.3e-30	COG0126	G	Carbohydrate transport and metabolism	phosphoglycerate kinase
TRINITY_DN15607_c0_g1	7955.ENSDARP00000124457	90	2.3e-25	ENOG410XRY4	S	Function unknown	WD repeat domain 43
TRINITY_DN15610_c0_g2	7955.ENSDARP00000007588	97.1	4e-52	COG0362	G	Carbohydrate transport and metabolism	Catalyzes the oxidative decarboxylation of 6- phosphogluconate to ribulose 5-phosphate and CO(2), with concomitant reduction of NADP to NADPH (By similarity)
TRINITY_DN15611_c0_g3	7955.ENSDARP00000089342	62.2	4.2e-20	ENOG4111IRY	S	Function unknown	tetraspanin
TRINITY_DN15612_c0_g1	29760.VIT_19s0014g04980.t01	68.1	1.5e-113	COG0451	M	Cell wall/membrane/envelope biogenesis	Nad-dependent epimerase dehydratase
TRINITY_DN15613_c0_g1	3847.GLYMA08G14810.1	100	7.4e-09	ENOG41117YM	S	Function unknown	NA
TRINITY_DN15617_c0_g1	486041.XP_001888817.1	60	1e-27	COG1404	O	Posttranslational modification, protein turnover, chaperones	peptidase (S8 and S53, subtilisin, kexin, sedolisin
TRINITY_DN15620_c0_g1	3847.GLYMA09G15620.2	100	1.3e-36	COG1215	M	Cell wall/membrane/envelope biogenesis	Glycosyl transferase, family 2
TRINITY_DN15629_c0_g1	3847.GLYMA13G43680.3	100	4.9e-43	ENOG410XNNY	S	Function unknown	coatomer protein complex, subunit beta 2 (beta prime)
TRINITY_DN15636_c1_g1	7955.ENSDARP00000117582	72.1	4.3e-23	COG2373	S	Function unknown	alpha-2-macroglobulin domain protein
TRINITY_DN15636_c1_g2	8049.ENSGMOP00000002326	72.9	3.6e-50	COG2373	S	Function unknown	alpha-2-macroglobulin domain protein
TRINITY_DN15636_c1_g3	69293.ENSGACP00000006701	55.4	1.9e-20	ENOG410XRED	S	Function unknown	Complement component
TRINITY_DN15636_c1_g4	7955.ENSDARP00000061057	60	4e-18	COG2373	S	Function unknown	alpha-2-macroglobulin domain protein
TRINITY_DN15639_c0_g1	8083.ENSXMAP00000015574	91	1.2e-27	COG2058	J	Translation, ribosomal structure and biogenesis	Ribosomal protein
TRINITY_DN15639_c0_g2	7955.ENSDARP00000022552	100	1.3e-27	COG2058	J	Translation, ribosomal structure and biogenesis	Ribosomal protein
TRINITY_DN15639_c0_g3	7955.ENSDARP00000022552	91	8.6e-25	COG2058	J	Translation, ribosomal structure and biogenesis	Ribosomal protein
TRINITY_DN15643_c0_g1	3694.POPTR_0014s11580.1	61.8	3.4e-32	ENOG4112442	S	Function unknown	Calvin cycle protein
TRINITY_DN15644_c0_g2	7955.ENSDARP00000011778	97	2e-31	COG0638	O	Posttranslational modification, protein turnover, chaperones	The proteasome is a multicatalytic proteinase complex which is characterized by its ability to cleave peptides with Arg, Phe, Tyr, Leu, and Glu adjacent to the leaving group at neutral or slightly basic pH. The proteasome has an ATP-dependent proteolytic activity (By similarity)
TRINITY_DN15645_c0_g1	6238.CBG01802	71.7	1.6e-13	ENOG4110K4T	S	Function unknown	Transthyretin-like family
TRINITY_DN15657_c0_g1	4113.PGSC0003DMT400071846	54.9	8.1e-21	ENOG410YQ60	S	Function unknown	Pathogenesis-related protein Bet v I family
TRINITY_DN15657_c0_g2	4113.PGSC0003DMT400008753	62.7	4e-09	ENOG410YQ60	S	Function unknown	Pathogenesis-related protein Bet v I family
TRINITY_DN15659_c0_g1	7955.ENSDARP00000104653	100	2.8e-33	COG0513	L	Replication, recombination and repair	purine NTP-dependent helicase activity
TRINITY_DN15659_c0_g2	7955.ENSDARP00000104653	100	1e-33	COG0513	L	Replication, recombination and repair	purine NTP-dependent helicase activity
TRINITY_DN15659_c0_g3	7955.ENSDARP00000104653	100	6.3e-53	COG0513	L	Replication, recombination and repair	purine NTP-dependent helicase activity
TRINITY_DN15661_c0_g1	3847.GLYMA20G22630.1	100	1.8e-16	COG2039	O	Posttranslational modification, protein turnover, chaperones	Removes 5-oxoproline from various penultimate amino acid residues except L-proline (By similarity)
TRINITY_DN15664_c0_g1	7955.ENSDARP00000015753	92.9	2.1e-38	ENOG410XPN8	K	Transcription	signal transducer and activator of transcription
TRINITY_DN15666_c0_g3	7955.ENSDARP00000096542	100	8e-37	ENOG410XPN8	K	Transcription	signal transducer and activator of transcription
TRINITY_DN15671_c0_g1	3847.GLYMA08G24930.1	96.3	2.9e-40	ENOG410YZCA	S	Function unknown	Protein of unknown function (DUF1138)
TRINITY_DN15673_c0_g1	3847.GLYMA11G12650.1	98.2	4.8e-52	ENOG4111DKA	S	Function unknown	organ-specific protein S2-like
TRINITY_DN15678_c0_g1	7955.ENSDARP00000040537	92.5	6.1e-28	COG0235	G	Carbohydrate transport and metabolism	Class II aldolase adducin
TRINITY_DN15681_c0_g1	7955.ENSDARP00000002061	98.7	5.1e-36	COG1084	S	Function unknown	Involved in the biogenesis of the 60S ribosomal subunit (By similarity)
TRINITY_DN15681_c0_g2	7955.ENSDARP00000002061	95.3	3.2e-34	COG1084	S	Function unknown	Involved in the biogenesis of the 60S ribosomal subunit (By similarity)
TRINITY_DN15682_c0_g1	3847.GLYMA01G01980.1	52	2.1e-16	ENOG410XQ5A	T	Signal transduction mechanisms	mitogen-activated protein kinase kinase
TRINITY_DN15683_c0_g2	7955.ENSDARP00000041401	94.7	1.7e-13	COG0406	G	Carbohydrate transport and metabolism	Phosphoglycerate mutase
TRINITY_DN15686_c0_g1	7955.ENSDARP00000067130	77.5	2.9e-25	COG0515	T	Signal transduction mechanisms	Serine Threonine protein kinase
TRINITY_DN15687_c0_g2	7955.ENSDARP00000020118	96.2	1.7e-37	ENOG410XRNN	S	Function unknown	integral membrane protein
TRINITY_DN15688_c0_g1	3847.GLYMA04G16660.1	100	1.8e-69	COG2238	J	Translation, ribosomal structure and biogenesis	Ribosomal protein
TRINITY_DN15690_c0_g1	3847.GLYMA13G43970.1	100	5.2e-35	ENOG411248W	S	Function unknown	expressed protein
TRINITY_DN15690_c0_g3	3847.GLYMA13G43970.1	98.8	7.7e-43	ENOG411248W	S	Function unknown	expressed protein
TRINITY_DN15692_c0_g2	7955.ENSDARP00000018579	90.2	1.3e-22	ENOG4111V1Q	U	Intracellular trafficking, secretion, and vesicular transport	type 1 fibroblast growth factor receptor binding
TRINITY_DN15695_c0_g1	3847.GLYMA19G39850.1	100	8.2e-33	COG0724	S	Function unknown	Rna-binding protein
TRINITY_DN15696_c1_g1	9606.ENSP00000433821	100	4e-54	COG0092	J	Translation, ribosomal structure and biogenesis	Binds the lower part of the 30S subunit head. Binds mRNA in the 70S ribosome, positioning it for translation (By similarity)
TRINITY_DN15696_c1_g2	9646.ENSAMEP00000018017	100	4.1e-74	COG0092	J	Translation, ribosomal structure and biogenesis	Binds the lower part of the 30S subunit head. Binds mRNA in the 70S ribosome, positioning it for translation (By similarity)
TRINITY_DN15696_c1_g4	7955.ENSDARP00000058963	100	4e-75	ENOG4110T15	S	Function unknown	NA
TRINITY_DN15702_c0_g2	59463.ENSMLUP00000022332	88.7	1.1e-16	ENOG410ZA5I	S	Function unknown	prothymosin, alpha
TRINITY_DN15702_c0_g3	39946.BGIOSGA014083-PA	100	5.9e-08	ENOG410YD56	S	Function unknown	Stem-specific protein
TRINITY_DN15704_c0_g5	3694.POPTR_0008s07160.1	52.2	6.7e-11	ENOG410XQT6	S	Function unknown	Ubox domain-containing protein
TRINITY_DN15709_c0_g1	7955.ENSDARP00000017569	100	3.1e-38	COG0021	G	Carbohydrate transport and metabolism	Transketolase
TRINITY_DN1570_c0_g1	3847.GLYMA03G28850.1	100	4.6e-109	ENOG410YAHP	G	Carbohydrate transport and metabolism	glucan endo-1-3-beta-glucosidase
TRINITY_DN1570_c0_g2	3847.GLYMA03G28850.1	100	6.6e-78	ENOG410YAHP	G	Carbohydrate transport and metabolism	glucan endo-1-3-beta-glucosidase
TRINITY_DN15715_c0_g1	4113.PGSC0003DMT400016187	32.8	2.2e-54	ENOG410Z3DC	S	Function unknown	Domain-Containing protein
TRINITY_DN1571_c0_g1	4555.Si024179m	90.1	1.2e-30	ENOG410YTGP	O	Posttranslational modification, protein turnover, chaperones	Cytochrome c oxidase subunit
TRINITY_DN15721_c0_g1	4113.PGSC0003DMT400011082	79.7	2.1e-29	ENOG41126D5	O	Posttranslational modification, protein turnover, chaperones	mitochondrial intermembrane chaperone that participates in the import and insertion of some multi-pass transmembrane proteins into the mitochondrial inner membrane. Also required for the transfer of beta-barrel precursors from the TOM complex to the sorting and assembly machinery (SAM complex) of the outer membrane. Acts as a chaperone-like protein that protects the hydrophobic precursors from ag…
TRINITY_DN15723_c0_g1	7955.ENSDARP00000031181	100	3.1e-38	ENOG4112266	J	Translation, ribosomal structure and biogenesis	40S ribosomal protein S21
TRINITY_DN15725_c0_g1	3711.Bra030262.1-P	77.3	6.5e-12	ENOG410ZTP2	S	Function unknown	ARM
TRINITY_DN15740_c0_g2	3847.GLYMA20G25520.1	56	2.1e-21	ENOG410YV7D	U	Intracellular trafficking, secretion, and vesicular transport	nonspecific lipid-transfer protein
TRINITY_DN15747_c0_g2	3847.GLYMA20G36330.1	100	2.3e-36	COG3914	O	Posttranslational modification, protein turnover, chaperones	protein N-acetylglucosaminyltransferase activity
TRINITY_DN15750_c0_g1	7955.ENSDARP00000051971	69.2	1.6e-28	ENOG410XR6S	S	Function unknown	Granulin
TRINITY_DN15751_c0_g1	99883.ENSTNIP00000015933	96.3	5.4e-23	ENOG410YV57	S	Function unknown	GTPase activating protein (SH3 domain) binding protein
TRINITY_DN15755_c1_g7	3847.GLYMA12G05811.1	100	5e-33	COG2723	G	Carbohydrate transport and metabolism	beta-glucosidase
TRINITY_DN15760_c0_g1	4538.ORGLA11G0134700.1	91.1	4.4e-49	NA	NA	NA	NA
TRINITY_DN15762_c0_g1	3847.GLYMA03G32620.1	100	4.1e-30	ENOG410ZUDQ	S	Function unknown	Autophagy beclin-1 regulator 1
TRINITY_DN15762_c1_g1	3847.GLYMA03G32620.1	100	2e-31	ENOG410ZUDQ	S	Function unknown	Autophagy beclin-1 regulator 1
TRINITY_DN15763_c0_g1	3847.GLYMA10G43770.1	100	1.3e-56	COG0255	J	Translation, ribosomal structure and biogenesis	50s ribosomal protein l29
TRINITY_DN15764_c0_g1	3847.GLYMA20G39410.1	65.7	1.2e-89	ENOG410YBJK	S	Function unknown	NA
TRINITY_DN15769_c0_g1	3847.GLYMA09G37070.3	98.5	7.8e-28	ENOG410XNN8	S	Function unknown	mRNA transport
TRINITY_DN15773_c0_g1	4113.PGSC0003DMT400015699	74.3	6.1e-26	ENOG410XS9J	S	Function unknown	BTB POZ domain-containing protein
TRINITY_DN15773_c0_g2	3694.POPTR_0014s16190.1	46.5	1.2e-13	ENOG410XS9J	S	Function unknown	BTB POZ domain-containing protein
TRINITY_DN15773_c0_g5	4113.PGSC0003DMT400015699	69.2	3.4e-24	ENOG410XS9J	S	Function unknown	BTB POZ domain-containing protein
TRINITY_DN15774_c0_g3	7955.ENSDARP00000081505	100	2.4e-33	COG2335	M	Cell wall/membrane/envelope biogenesis	Beta-Ig-H3 fasciclin
TRINITY_DN15775_c0_g1	29760.VIT_18s0166g00180.t01	82.7	1.8e-24	COG0724	S	Function unknown	Rna-binding protein
TRINITY_DN15776_c0_g3	7955.ENSDARP00000066372	100	7.1e-28	ENOG410ZBK1	U	Intracellular trafficking, secretion, and vesicular transport	voltage-dependent anion channel
TRINITY_DN15778_c0_g1	43179.ENSSTOP00000006187	93	7.3e-94	ENOG4111FVP	S	Function unknown	tumor protein
TRINITY_DN1577_c0_g1	39946.BGIOSGA015796-PA	100	1.4e-10	COG1071	C	Energy production and conversion	Dehydrogenase
TRINITY_DN15788_c0_g2	3694.POPTR_0013s07230.1	67.9	1.4e-12	ENOG410YDJK	S	Function unknown	benzyl alcohol O-benzoyltransferase-like
TRINITY_DN15789_c0_g1	59463.ENSMLUP00000001301	75.5	7.7e-14	ENOG410YBHR	S	Function unknown	SERPINE1 mRNA binding protein 1
TRINITY_DN15790_c0_g1	3847.GLYMA18G03850.1	63.9	1.4e-31	ENOG410YTCF	S	Function unknown	Plastocyanin-like domain
TRINITY_DN15801_c0_g3	3847.GLYMA19G41670.1	100	1.4e-32	ENOG410YIKI	U	Intracellular trafficking, secretion, and vesicular transport	Small GTPase component of the coat protein complex II (COPII) which promotes the formation of transport vesicles from the endoplasmic reticulum (ER). The coat has two main functions, the physical deformation of the endoplasmic reticulum membrane into vesicles and the selection of cargo molecules. SAR1 controls the coat assembly in a stepwise manner. Activated SAR1-GTP binds to membranes first and…
TRINITY_DN15804_c0_g1	4081.Solyc03g005980.2.1	68.2	3.2e-97	COG0580	G	Carbohydrate transport and metabolism	Channel that permits osmotically driven movement of water in both directions. It is involved in the osmoregulation and in the maintenance of cell turgor during volume expansion in rapidly growing cells. It mediates rapid entry or exit of water in response to abrupt changes in osmolarity (By similarity)
TRINITY_DN15819_c0_g1	29760.VIT_03s0063g00920.t01	76.7	4.6e-168	ENOG411206Y	S	Function unknown	transposon protein
TRINITY_DN1581_c0_g1	9606.ENSP00000215071	100	7.9e-47	ENOG410XXP2	O	Posttranslational modification, protein turnover, chaperones	26S proteasome nonATPase regulatory subunit
TRINITY_DN15821_c0_g1	3847.GLYMA19G41400.3	100	2.3e-33	COG5028	U	Intracellular trafficking, secretion, and vesicular transport	SEC24 family, member
TRINITY_DN15822_c0_g1	7955.ENSDARP00000074998	82.6	3.2e-72	ENOG4111QHM	G	Carbohydrate transport and metabolism	those in tissues and body fluids are associated with the monocyte- macrophage system and enhance the activity of immunoagents
TRINITY_DN15824_c0_g1	7955.ENSDARP00000011098	97.4	1.8e-13	ENOG410YYIF	S	Function unknown	Chromosome 16 open reading frame 72
TRINITY_DN15826_c0_g1	29760.VIT_04s0008g03800.t01	64.6	1.3e-81	COG5193	J	Translation, ribosomal structure and biogenesis	La ribonucleoprotein domain family member
TRINITY_DN15826_c0_g1	29760.VIT_04s0008g03800.t01	64.6	1.3e-81	COG5193	O	Posttranslational modification, protein turnover, chaperones	La ribonucleoprotein domain family member
TRINITY_DN15826_c0_g2	3694.POPTR_0006s25850.1	67.4	2.2e-39	COG5193	J	Translation, ribosomal structure and biogenesis	La ribonucleoprotein domain family member
TRINITY_DN15826_c0_g2	3694.POPTR_0006s25850.1	67.4	2.2e-39	COG5193	O	Posttranslational modification, protein turnover, chaperones	La ribonucleoprotein domain family member
TRINITY_DN15830_c0_g2	7955.ENSDARP00000102798	87.8	1.4e-31	ENOG41124WE	S	Function unknown	Helix-loop-helix DNA-binding domain
TRINITY_DN15838_c0_g2	29760.VIT_10s0092g00230.t01	70.2	1.3e-15	ENOG4111MH5	S	Function unknown	LSD1 zinc finger domain containing protein, expressed
TRINITY_DN15839_c0_g1	4113.PGSC0003DMT400021734	67.3	1.2e-96	ENOG4111GZ5	S	Function unknown	NA
TRINITY_DN15842_c0_g1	29760.VIT_19s0014g05430.t01	37.7	1.4e-18	ENOG41113EN	U	Intracellular trafficking, secretion, and vesicular transport	disease resistance
TRINITY_DN15843_c0_g1	3694.POPTR_0015s13070.1	63.2	3.5e-25	COG5082	O	Posttranslational modification, protein turnover, chaperones	zinc finger
TRINITY_DN15843_c0_g1	3694.POPTR_0015s13070.1	63.2	3.5e-25	COG5082	U	Intracellular trafficking, secretion, and vesicular transport	zinc finger
TRINITY_DN15847_c0_g2	29760.VIT_00s0868g00010.t01	34.3	4.6e-23	ENOG410YYUR	K	Transcription	Protein of unknown function, DUF573
TRINITY_DN15849_c0_g1	7955.ENSDARP00000095074	90.7	1.7e-20	ENOG4111F3B	S	Function unknown	2',3'-cyclic nucleotide 3' phosphodiesterase
TRINITY_DN15857_c1_g1	3847.GLYMA06G47740.1	97.6	1.5e-25	ENOG41115R1	S	Function unknown	Invertase pectin methylesterase inhibitor family protein
TRINITY_DN15864_c0_g1	29760.VIT_12s0059g00830.t01	36.9	9.9e-21	ENOG410YZUA	S	Function unknown	Disease resistance response protein
TRINITY_DN15867_c0_g1	3847.GLYMA18G40652.1	100	1.5e-46	NA	NA	NA	NA
TRINITY_DN15869_c0_g1	4081.Solyc06g071280.2.1	55.2	1.8e-180	ENOG410YEK6	S	Function unknown	enhanced disease susceptibility 1
TRINITY_DN15874_c0_g1	39947.LOC_Os07g24830.1	98.7	5.1e-28	ENOG41106JV	S	Function unknown	NA
TRINITY_DN15878_c0_g2	29760.VIT_08s0007g07680.t01	63.2	1.7e-06	COG0580	G	Carbohydrate transport and metabolism	Channel that permits osmotically driven movement of water in both directions. It is involved in the osmoregulation and in the maintenance of cell turgor during volume expansion in rapidly growing cells. It mediates rapid entry or exit of water in response to abrupt changes in osmolarity (By similarity)
TRINITY_DN15879_c0_g1	3694.POPTR_0001s11240.1	73	9.3e-27	ENOG410YR23	S	Function unknown	Early nodulin-like protein
TRINITY_DN15879_c0_g2	29760.VIT_02s0025g02410.t01	66.2	1.5e-16	ENOG410YR23	S	Function unknown	Early nodulin-like protein
TRINITY_DN15880_c0_g1	29760.VIT_19s0015g00780.t01	77.8	1.4e-165	COG0202	K	Transcription	DNA-dependent RNA polymerase catalyzes the transcription of DNA into RNA using the four ribonucleoside triphosphates as substrates (By similarity)
TRINITY_DN15883_c0_g1	29760.VIT_08s0105g00510.t01	60.3	1.7e-15	ENOG410XYWE	S	Function unknown	NA
TRINITY_DN15892_c0_g1	28377.ENSACAP00000017665	98.7	4.7e-84	COG1100	S	Function unknown	GTP-binding Protein
TRINITY_DN15894_c0_g3	203124.Tery_3315	59.1	9.1e-06	COG3781	S	Function unknown	UPF0187 protein
TRINITY_DN15895_c0_g1	3847.GLYMA13G07220.1	100	9.5e-97	COG5498	M	Cell wall/membrane/envelope biogenesis	Hydrolase
TRINITY_DN15897_c0_g1	10090.ENSMUSP00000088372	100	3.1e-99	COG1528	P	Inorganic ion transport and metabolism	Stores iron in a soluble, non-toxic, readily available form. Important for iron homeostasis (By similarity)
TRINITY_DN15899_c0_g1	29760.VIT_07s0031g00090.t01	74.2	1e-172	COG0042	J	Translation, ribosomal structure and biogenesis	Catalyzes the synthesis of dihydrouridine a modified base found in the D-loop of most tRNAs (By similarity)
TRINITY_DN1589_c0_g1	9606.ENSP00000398632	100	2.7e-21	ENOG4111S6T	U	Intracellular trafficking, secretion, and vesicular transport	CD44 molecule (Indian blood group)
TRINITY_DN15902_c0_g1	3847.GLYMA18G53390.1	57.5	1.7e-14	ENOG410YVWD	S	Function unknown	NA
TRINITY_DN15904_c0_g1	4081.Solyc04g081050.1.1	81.9	1.5e-307	ENOG41102AN	S	Function unknown	Calcium-binding EF hand family protein
TRINITY_DN15906_c0_g1	7955.ENSDARP00000058502	100	5.2e-33	ENOG4110EPW	U	Intracellular trafficking, secretion, and vesicular transport	long-chain fatty acid biosynthetic process
TRINITY_DN15907_c0_g1	4113.PGSC0003DMT400073334	63	5.9e-48	ENOG4111RRZ	K	Transcription	Transcription factor
TRINITY_DN15913_c0_g1	4641.GSMUA_Achr6P16990_001	79.5	3.8e-34	ENOG4111YK0	S	Function unknown	COX assembly mitochondrial protein 1 homolog (S. cerevisiae)
TRINITY_DN15914_c0_g1	3847.GLYMA16G26920.1	98.6	4.1e-27	ENOG410XPXR	O	Posttranslational modification, protein turnover, chaperones	t-complex protein 1
TRINITY_DN15915_c0_g1	29760.VIT_03s0038g00270.t01	77.2	1.9e-291	ENOG41110QX	S	Function unknown	cellular response to blue light
TRINITY_DN15916_c0_g1	29760.VIT_06s0061g00770.t01	75.8	8.2e-77	ENOG4111HFB	J	Translation, ribosomal structure and biogenesis	ribosomal protein l9
TRINITY_DN15917_c0_g1	29760.VIT_11s0016g05270.t01	53.8	1.5e-23	ENOG410YQQQ	S	Function unknown	defective protein 2
TRINITY_DN15921_c0_g1	29760.VIT_15s0046g01620.t01	66.3	5e-33	ENOG4111HG6	S	Function unknown	glycosyltransferase family protein 1
TRINITY_DN15924_c0_g1	3694.POPTR_0012s03380.1	68	3.9e-30	COG0271	T	Signal transduction mechanisms	Bola-like protein
TRINITY_DN15929_c0_g1	3847.GLYMA04G07190.1	100	1.4e-69	ENOG410XP1S	S	Function unknown	solute carrier family 35 member
TRINITY_DN15930_c0_g1	3847.GLYMA04G09740.1	100	6.5e-39	ENOG410XNV7	O	Posttranslational modification, protein turnover, chaperones	aspartic
TRINITY_DN15930_c0_g2	3847.GLYMA04G09740.1	100	5.7e-38	ENOG410XNV7	O	Posttranslational modification, protein turnover, chaperones	aspartic
TRINITY_DN15932_c0_g1	3847.GLYMA08G07590.1	100	1.6e-34	ENOG41107QF	S	Function unknown	phosphate-induced protein 1 conserved region domain containing protein, expressed
TRINITY_DN15935_c1_g3	29760.VIT_14s0060g01740.t01	63.6	8.2e-108	ENOG410XUPD	S	Function unknown	Folate receptor family
TRINITY_DN15938_c0_g1	7955.ENSDARP00000022273	92.6	1.7e-21	ENOG4111UWC	S	Function unknown	zinc finger
TRINITY_DN15942_c0_g1	3694.POPTR_0004s18610.1	77.3	3e-135	COG0142	H	Coenzyme transport and metabolism	synthase
TRINITY_DN15944_c0_g1	4081.Solyc01g100700.2.1	69.4	8.4e-34	ENOG410YTIQ	S	Function unknown	IGR protein motif
TRINITY_DN15955_c0_g3	29760.VIT_11s0103g00630.t01	84.9	4e-39	ENOG410Y3AQ	S	Function unknown	NA
TRINITY_DN15958_c0_g1	3847.GLYMA13G18900.1	68.1	8.4e-26	ENOG410Z0I1	U	Intracellular trafficking, secretion, and vesicular transport	mitochondrial import receptor subunit TOM22 homolog 2-like
TRINITY_DN15959_c0_g2	7955.ENSDARP00000056852	100	1.8e-35	COG5022	Z	Cytoskeleton	myosin heavy chain
TRINITY_DN15959_c0_g5	8049.ENSGMOP00000010141	90	1.6e-19	COG5022	Z	Cytoskeleton	myosin heavy chain
TRINITY_DN15966_c0_g1	29760.VIT_13s0064g01450.t01	75.6	3.9e-56	ENOG4111Q2V	O	Posttranslational modification, protein turnover, chaperones	Thioredoxin domain containing 17
TRINITY_DN15969_c0_g1	39947.LOC_Os07g10580.1	99.4	2.6e-79	NA	NA	NA	NA
TRINITY_DN15970_c0_g1	29760.VIT_02s0025g01340.t01	90.3	2.7e-72	ENOG4111HU5	S	Function unknown	abscisic acid receptor
TRINITY_DN15974_c0_g3	7955.ENSDARP00000104892	81	1.1e-25	COG0457	S	Function unknown	repeat-containing protein
TRINITY_DN15983_c0_g1	3847.GLYMA08G06420.1	100	4e-19	ENOG410XNQK	G	Carbohydrate transport and metabolism	Transporter
TRINITY_DN15987_c0_g1	3711.Bra008101.1-P	48	1.5e-16	COG0494	L	Replication, recombination and repair	Nudix hydrolase
TRINITY_DN15992_c0_g1	7955.ENSDARP00000099664	94.3	1.7e-81	COG1310	S	Function unknown	Component of the eukaryotic translation initiation factor 3 (eIF-3) complex, which is involved in protein synthesis and, together with other initiation factors, stimulates binding of mRNA and methionyl-tRNAi to the 40S ribosome (By similarity)
TRINITY_DN15997_c0_g1	4081.Solyc01g101260.2.1	49.3	1.8e-12	ENOG410ZAK7	S	Function unknown	NA
TRINITY_DN1599_c0_g1	4081.Solyc10g078460.1.1	51.2	1.2e-10	COG4642	S	Function unknown	whole genome shotgun sequence
TRINITY_DN1599_c0_g1	4081.Solyc10g078460.1.1	51.2	1.2e-10	COG5253	T	Signal transduction mechanisms	phosphatidylinositol-4-phosphate 5-kinase
TRINITY_DN15_c0_g1	39946.BGIOSGA030593-PA	100	8.6e-26	ENOG410ZBK1	U	Intracellular trafficking, secretion, and vesicular transport	voltage-dependent anion channel
TRINITY_DN16003_c0_g1	7955.ENSDARP00000096540	76.3	1.8e-25	ENOG410XRZH	S	Function unknown	Aryl hydrocarbon receptor
TRINITY_DN16004_c0_g1	3694.POPTR_0005s08190.1	91	1.5e-29	ENOG410ZTP2	S	Function unknown	ARM
TRINITY_DN16006_c0_g2	29760.VIT_12s0059g00900.t01	60.2	7.3e-23	ENOG410Z7Z7	S	Function unknown	Pentatricopeptide repeat-containing protein
TRINITY_DN16006_c0_g3	29760.VIT_12s0059g00900.t01	67.5	4e-23	ENOG410Z7Z7	S	Function unknown	Pentatricopeptide repeat-containing protein
TRINITY_DN16012_c0_g1	5085.CADAFUBP00001219	80.3	5.3e-24	COG0058	G	Carbohydrate transport and metabolism	Phosphorylase is an important allosteric enzyme in carbohydrate metabolism. Enzymes from different sources differ in their regulatory mechanisms and in their natural substrates. However, all known phosphorylases share catalytic and structural properties (By similarity)
TRINITY_DN16012_c0_g2	336963.XP_002544918.1	54.5	4.9e-14	COG0058	G	Carbohydrate transport and metabolism	Phosphorylase is an important allosteric enzyme in carbohydrate metabolism. Enzymes from different sources differ in their regulatory mechanisms and in their natural substrates. However, all known phosphorylases share catalytic and structural properties (By similarity)
TRINITY_DN16015_c0_g2	7955.ENSDARP00000004469	93.5	4.9e-41	COG5024	D	Cell cycle control, cell division, chromosome partitioning	g2 mitotic-specific
TRINITY_DN16017_c0_g1	5022.CBX96307	67.6	8.5e-20	COG5274	C	Energy production and conversion	cytochrome b5
TRINITY_DN16017_c0_g1	5022.CBX96307	67.6	8.5e-20	COG5274	I	Lipid transport and metabolism	cytochrome b5
TRINITY_DN16020_c1_g1	7955.ENSDARP00000087879	93.2	1.2e-307	COG1009	C	Energy production and conversion	subunit l
TRINITY_DN16020_c1_g2	10116.ENSRNOP00000044573	91.3	4.1e-41	COG1009	C	Energy production and conversion	subunit l
TRINITY_DN16022_c0_g1	4113.PGSC0003DMT400041812	80.3	1.9e-89	ENOG410YF4C	G	Carbohydrate transport and metabolism	peroxidase
TRINITY_DN16023_c0_g1	3847.GLYMA19G06080.1	74	9e-35	COG1761	K	Transcription	DNA-dependent RNA polymerase catalyzes the transcription of DNA into RNA using the four ribonucleoside triphosphates as substrates
TRINITY_DN16024_c0_g2	4113.PGSC0003DMT400085749	66.2	1.1e-70	ENOG4110R60	S	Function unknown	regulation of meristem structural organization
TRINITY_DN16024_c0_g3	4113.PGSC0003DMT400020318	66.7	3.6e-205	ENOG4110R60	S	Function unknown	regulation of meristem structural organization
TRINITY_DN16026_c0_g1	3702.AT2G47160.2	86.8	2.1e-12	ENOG410XPHD	U	Intracellular trafficking, secretion, and vesicular transport	solute carrier family 4
TRINITY_DN16032_c0_g1	4081.Solyc02g080410.2.1	75.2	3.8e-51	COG0071	O	Posttranslational modification, protein turnover, chaperones	response to heat
TRINITY_DN16036_c0_g1	3847.GLYMA07G37060.1	100	1.1e-26	ENOG4112428	J	Translation, ribosomal structure and biogenesis	ribosomal protein l29
TRINITY_DN16038_c0_g1	3847.GLYMA12G12740.1	100	4e-19	ENOG410YI4W	S	Function unknown	Hydroxyproline-rich glycoprotein family protein
TRINITY_DN16042_c0_g1	4081.Solyc06g008100.2.1	85.7	4.3e-21	COG3450	S	Function unknown	Enzyme of the cupin superfamily
TRINITY_DN16042_c0_g2	4081.Solyc06g008100.2.1	54.8	1.1e-32	COG3450	S	Function unknown	Enzyme of the cupin superfamily
TRINITY_DN16047_c0_g1	29760.VIT_05s0020g03010.t01	62.9	2.3e-12	COG0657	I	Lipid transport and metabolism	alpha beta hydrolase fold-3 domain protein
TRINITY_DN16047_c0_g2	4081.Solyc09g075670.1.1	54.5	1.9e-78	COG0657	I	Lipid transport and metabolism	alpha beta hydrolase fold-3 domain protein
TRINITY_DN16050_c0_g1	7955.ENSDARP00000052330	100	5.3e-58	COG0051	J	Translation, ribosomal structure and biogenesis	tRNA binding
TRINITY_DN16050_c0_g2	7955.ENSDARP00000052330	100	3.3e-51	COG0051	J	Translation, ribosomal structure and biogenesis	tRNA binding
TRINITY_DN16052_c0_g1	3711.Bra031915.1-P	39.5	4.2e-25	ENOG410YHMV	S	Function unknown	(NAC) domain-containing protein
TRINITY_DN16059_c0_g1	7955.ENSDARP00000015753	85.7	6.1e-29	ENOG410XPN8	K	Transcription	signal transducer and activator of transcription
TRINITY_DN16061_c0_g2	29760.VIT_00s2386g00010.t01	48.9	7.6e-15	ENOG410YM84	S	Function unknown	Arabidopsis protein of unknown function
TRINITY_DN16065_c0_g3	3694.POPTR_0010s20400.1	73.1	5.6e-18	COG1404	O	Posttranslational modification, protein turnover, chaperones	peptidase (S8 and S53, subtilisin, kexin, sedolisin
TRINITY_DN16067_c0_g2	3847.GLYMA09G33960.1	100	9.6e-22	ENOG4111FG4	S	Function unknown	rna recognition motif containing
TRINITY_DN16069_c0_g1	4113.PGSC0003DMT400023326	55.3	3.8e-55	ENOG410YX8C	S	Function unknown	NA
TRINITY_DN16072_c0_g1	7955.ENSDARP00000014252	100	8e-31	COG0636	C	Energy production and conversion	F(1)F(0) ATP synthase produces ATP from ADP in the presence of a proton or sodium gradient. F-type ATPases consist of two structural domains, F(1) containing the extramembraneous catalytic core and F(0) containing the membrane proton channel, linked together by a central stalk and a peripheral stalk. During catalysis, ATP synthesis in the catalytic domain of F(1) is coupled via a rotary mechanism…
TRINITY_DN16073_c0_g4	7955.ENSDARP00000107572	98.5	3.1e-32	COG0515	T	Signal transduction mechanisms	Serine Threonine protein kinase
TRINITY_DN16073_c0_g6	7955.ENSDARP00000107572	79.7	1.1e-26	COG0515	T	Signal transduction mechanisms	Serine Threonine protein kinase
TRINITY_DN16073_c0_g9	7955.ENSDARP00000107572	87.6	1.9e-37	COG0515	T	Signal transduction mechanisms	Serine Threonine protein kinase
TRINITY_DN16075_c0_g2	29760.VIT_18s0001g01410.t01	34.2	5.1e-15	ENOG41115P3	S	Function unknown	NA
TRINITY_DN16076_c0_g2	3694.POPTR_0005s22430.1	71.2	9.4e-57	ENOG410Z7Z7	S	Function unknown	Pentatricopeptide repeat-containing protein
TRINITY_DN16078_c0_g1	39946.BGIOSGA003157-PA	100	1.8e-11	COG0515	T	Signal transduction mechanisms	Serine Threonine protein kinase
TRINITY_DN16078_c0_g2	39946.BGIOSGA034099-PA	97.3	8.8e-12	COG0515	T	Signal transduction mechanisms	Serine Threonine protein kinase
TRINITY_DN16085_c0_g1	29760.VIT_13s0019g01210.t01	58.8	2.5e-53	ENOG41116V5	U	Intracellular trafficking, secretion, and vesicular transport	Dirigent-like protein
TRINITY_DN16086_c0_g1	3694.POPTR_1092s00200.1	78	1.7e-08	ENOG410YFKY	S	Function unknown	NA
TRINITY_DN16086_c0_g2	4113.PGSC0003DMT400024514	62	1.2e-49	ENOG410YFKY	S	Function unknown	NA
TRINITY_DN16086_c0_g3	3711.Bra031374.1-P	55.9	7.9e-08	NA	NA	NA	NA
TRINITY_DN16090_c0_g1	4113.PGSC0003DMT400053681	70.5	2.6e-36	COG1761	K	Transcription	DNA-dependent RNA polymerase catalyzes the transcription of DNA into RNA using the four ribonucleoside triphosphates as substrates
TRINITY_DN16092_c0_g1	3694.POPTR_0008s13300.1	60.7	9.7e-54	ENOG410YCA0	U	Intracellular trafficking, secretion, and vesicular transport	cysteine-rich repeat secretory protein
TRINITY_DN16094_c0_g1	8128.ENSONIP00000003346	98.2	9.2e-57	COG1911	J	Translation, ribosomal structure and biogenesis	(ribosomal) protein
TRINITY_DN16096_c0_g1	4081.Solyc01g097140.2.1	78	8.5e-56	COG0607	P	Inorganic ion transport and metabolism	Rhodanese domain protein
TRINITY_DN16099_c0_g1	7955.ENSDARP00000082752	84.9	4.6e-101	ENOG410XP9G	T	Signal transduction mechanisms	mitogen-activated protein kinase kinase kinase kinase
TRINITY_DN16109_c0_g1	4081.Solyc09g082660.2.1	58.9	1.7e-72	COG4122	S	Function unknown	O-methyltransferase
TRINITY_DN16110_c0_g1	3847.GLYMA03G33830.1	100	9.4e-45	COG0019	E	Amino acid transport and metabolism	Specifically catalyzes the decarboxylation of meso- diaminopimelate (meso-DAP) to L-lysine (By similarity)
TRINITY_DN16114_c0_g1	8083.ENSXMAP00000013588	71.1	2.5e-25	ENOG410YC4U	S	Function unknown	SAM and SH3 domain containing 3
TRINITY_DN16117_c1_g1	30608.ENSMICP00000009213	98.5	5.1e-32	COG5354	J	Translation, ribosomal structure and biogenesis	Component of the eukaryotic translation initiation factor 3 (eIF-3) complex, which is involved in protein synthesis and, together with other initiation factors, stimulates binding of mRNA and methionyl-tRNAi to the 40S ribosome (By similarity)
TRINITY_DN16118_c0_g1	7955.ENSDARP00000094162	82.8	1.7e-32	ENOG410Y240	S	Function unknown	solute carrier family 25 (mitochondrial carrier, glutamate), member 22
TRINITY_DN16118_c0_g2	7955.ENSDARP00000094162	95.1	3.8e-14	ENOG410Y240	S	Function unknown	solute carrier family 25 (mitochondrial carrier, glutamate), member 22
TRINITY_DN16121_c0_g1	29760.VIT_14s0066g00980.t01	53.6	2.6e-102	ENOG41119ND	S	Function unknown	NA
TRINITY_DN16122_c0_g1	3847.GLYMA13G29291.1	100	1.5e-37	ENOG4111UT0	O	Posttranslational modification, protein turnover, chaperones	Ubiquitin-like protein
TRINITY_DN16125_c0_g1	3694.POPTR_0012s14600.1	55.8	1.1e-39	ENOG4111GU8	U	Intracellular trafficking, secretion, and vesicular transport	jagunal homolog 1 (Drosophila)
TRINITY_DN16126_c0_g1	3847.GLYMA01G20670.1	100	6.2e-30	COG5272	O	Posttranslational modification, protein turnover, chaperones	ubiquitin
TRINITY_DN16127_c0_g1	3218.PP1S62_94V6.2	47.5	2.8e-07	COG5038	S	Function unknown	Domain-Containing protein
TRINITY_DN16129_c0_g1	3847.GLYMA07G17000.2	100	1.5e-21	ENOG410ZFBK	S	Function unknown	Protease inhibitor seed storage lipid transfer protein
TRINITY_DN16137_c0_g5	7955.ENSDARP00000122973	68.1	8.7e-15	ENOG410ZNK1	S	Function unknown	negative regulation of proteasomal ubiquitin-dependent protein catabolic process
TRINITY_DN16140_c0_g1	3847.GLYMA11G19300.1	100	6.1e-31	ENOG410YT3B	S	Function unknown	Cytochrome c oxidase subunit VIIa
TRINITY_DN16142_c0_g1	3847.GLYMA05G24410.1	100	1.5e-48	COG0631	T	Signal transduction mechanisms	Phosphatase
TRINITY_DN16147_c0_g1	3847.GLYMA11G12230.1	75.6	5.4e-18	ENOG410XRH2	U	Intracellular trafficking, secretion, and vesicular transport	The coatomer is a cytosolic protein complex that binds to dilysine motifs and reversibly associates with Golgi non- clathrin-coated vesicles, which further mediate biosynthetic protein transport from the ER, via the Golgi up to the trans Golgi network. Coatomer complex is required for budding from Golgi membranes, and is essential for the retrograde Golgi-to-ER transport of dilysine-tagged protei…
TRINITY_DN16149_c0_g1	4641.GSMUA_Achr5P10450_001	62.8	7.7e-24	ENOG410Z8I0	S	Function unknown	Peptidoglycan-binding LysM domain-containing protein
TRINITY_DN16153_c0_g1	7955.ENSDARP00000011213	88.1	2.4e-16	ENOG4111F6G	S	Function unknown	coagulation factor
TRINITY_DN16154_c0_g1	29760.VIT_06s0004g02100.t01	73.4	8.5e-86	ENOG41101ES	I	Lipid transport and metabolism	emopamil binding protein (sterol isomerase)
TRINITY_DN16155_c0_g1	7955.ENSDARP00000121958	88	2e-29	NA	NA	NA	NA
TRINITY_DN16158_c0_g1	29760.VIT_19s0090g00310.t01	36.3	4.6e-46	ENOG410YU99	S	Function unknown	NA
TRINITY_DN16164_c0_g1	4577.AF546187.1_FGP001	100	3.5e-46	NA	NA	NA	NA
TRINITY_DN16165_c0_g1	7955.ENSDARP00000121537	93.2	2.5e-32	ENOG410XQBP	T	Signal transduction mechanisms	Polo-like kinase
TRINITY_DN16165_c0_g2	7955.ENSDARP00000121537	92.5	1.6e-51	ENOG410XQBP	T	Signal transduction mechanisms	Polo-like kinase
TRINITY_DN1616_c0_g1	39947.LOC_Os12g03710.1	100	3.4e-34	ENOG4111GHC	S	Function unknown	RNA recognition motif. (a.k.a. RRM, RBD, or RNP domain)
TRINITY_DN16170_c0_g1	39947.LOC_Os09g11040.1	60.8	5.8e-22	COG2801	L	Replication, recombination and repair	Retrotransposon protein
TRINITY_DN16170_c2_g1	39947.LOC_Os02g06050.1	55.7	7e-13	COG2801	L	Replication, recombination and repair	Retrotransposon protein
TRINITY_DN16173_c0_g1	39946.BGIOSGA006930-PA	100	1.7e-44	ENOG410XQ54	S	Function unknown	F-box and leucine-rich repeat protein
TRINITY_DN16176_c0_g1	29760.VIT_08s0040g02510.t01	79.7	7.5e-90	ENOG410YI08	S	Function unknown	NA
TRINITY_DN16176_c0_g2	29760.VIT_08s0040g02510.t01	57	2.3e-40	ENOG410YI08	S	Function unknown	NA
TRINITY_DN16177_c0_g1	3847.GLYMA05G04530.1	75.4	2.9e-92	ENOG4111GZ1	S	Function unknown	Pfam:YbaK
TRINITY_DN16179_c0_g1	7955.ENSDARP00000069063	97.7	1.3e-43	COG5019	D	Cell cycle control, cell division, chromosome partitioning	Cell division control protein
TRINITY_DN16179_c0_g1	7955.ENSDARP00000069063	97.7	1.3e-43	COG5019	Z	Cytoskeleton	Cell division control protein
TRINITY_DN16179_c0_g2	13735.ENSPSIP00000018388	93.3	5.3e-38	COG5019	D	Cell cycle control, cell division, chromosome partitioning	Cell division control protein
TRINITY_DN16179_c0_g2	13735.ENSPSIP00000018388	93.3	5.3e-38	COG5019	Z	Cytoskeleton	Cell division control protein
TRINITY_DN16180_c0_g1	29760.VIT_09s0002g08090.t01	63.1	3.2e-125	COG3491	S	Function unknown	2OGFe(II) oxygenase
TRINITY_DN16182_c0_g2	29760.VIT_13s0019g01260.t01	79.7	7.6e-148	ENOG410XR2S	S	Function unknown	Trans-2,3-enoyl-CoA
TRINITY_DN16185_c0_g2	3847.GLYMA10G34880.2	100	1.5e-32	COG2608	S	Function unknown	heavy metal transport detoxification protein
TRINITY_DN16186_c0_g1	29760.VIT_19s0014g03850.t01	75.2	7.1e-94	COG0723	C	Energy production and conversion	Component of the ubiquinol-cytochrome c reductase complex (complex III or cytochrome b-c1 complex), which is a respiratory chain that generates an electrochemical potential coupled to ATP synthesis (By similarity)
TRINITY_DN16189_c0_g1	29760.VIT_04s0008g02960.t01	53.1	8.6e-141	COG2124	Q	Secondary metabolites biosynthesis, transport and catabolism	Cytochrome p450
TRINITY_DN16198_c0_g3	39946.BGIOSGA028412-PA	100	4.8e-36	COG1355	S	Function unknown	UPF0103 protein
TRINITY_DN16199_c0_g1	3847.GLYMA07G39130.1	99.2	1.9e-64	COG0175	P	Inorganic ion transport and metabolism	Reduction of activated sulfate into sulfite (By similarity)
TRINITY_DN16202_c0_g1	4113.PGSC0003DMT400054946	44.4	5.7e-85	ENOG410Y8GW	O	Posttranslational modification, protein turnover, chaperones	Ubiquitin-protein ligase
TRINITY_DN16205_c0_g1	3847.GLYMA02G46590.1	95.1	4.6e-35	COG0584	C	Energy production and conversion	glycerophosphoryl diester phosphodiesterase
TRINITY_DN16207_c0_g1	3694.POPTR_0008s13950.1	45.4	1e-91	ENOG410XQ90	U	Intracellular trafficking, secretion, and vesicular transport	Clathrin assembly protein
TRINITY_DN16208_c1_g1	3847.GLYMA06G14290.1	100	3.8e-36	ENOG410ZJIT	S	Function unknown	nac domain
TRINITY_DN16209_c0_g1	7955.ENSDARP00000003641	89	3.7e-83	COG0652	O	Posttranslational modification, protein turnover, chaperones	peptidyl-prolyl cis-trans isomerase activity
TRINITY_DN16209_c0_g2	31033.ENSTRUP00000047619	82.9	8.8e-12	COG0652	O	Posttranslational modification, protein turnover, chaperones	peptidyl-prolyl cis-trans isomerase activity
TRINITY_DN16209_c0_g3	7955.ENSDARP00000003641	99.4	1.4e-91	COG0652	O	Posttranslational modification, protein turnover, chaperones	peptidyl-prolyl cis-trans isomerase activity
TRINITY_DN16210_c0_g2	7955.ENSDARP00000088098	95.9	8.5e-44	COG5347	U	Intracellular trafficking, secretion, and vesicular transport	domain, ankyrin repeat and PH domain
TRINITY_DN16210_c0_g3	7955.ENSDARP00000088098	83.7	1.3e-11	COG5347	U	Intracellular trafficking, secretion, and vesicular transport	domain, ankyrin repeat and PH domain
TRINITY_DN16211_c0_g1	39946.BGIOSGA020332-PA	100	1.8e-57	COG2451	J	Translation, ribosomal structure and biogenesis	Ribosomal protein
TRINITY_DN16215_c0_g1	3847.GLYMA05G17470.1	100	2.9e-127	COG4886	S	Function unknown	leucine Rich Repeat
TRINITY_DN16216_c0_g1	39946.BGIOSGA014715-PA	100	4e-67	COG2163	J	Translation, ribosomal structure and biogenesis	(ribosomal) protein
TRINITY_DN16216_c0_g2	3847.GLYMA10G32580.1	100	2.6e-47	COG2163	J	Translation, ribosomal structure and biogenesis	(ribosomal) protein
TRINITY_DN16217_c0_g1	3694.POPTR_0003s08420.1	88	1.3e-51	COG0466	O	Posttranslational modification, protein turnover, chaperones	ATP-dependent serine protease that mediates the selective degradation of mutant and abnormal proteins as well as certain short-lived regulatory proteins. Required for cellular homeostasis and for survival from DNA damage and developmental changes induced by stress. Degrades polypeptides processively to yield small peptide fragments that are 5 to 10 amino acids long. Binds to DNA in a double-stran…
TRINITY_DN16217_c0_g4	4081.Solyc08g077440.2.1	91.2	9.5e-10	COG0466	O	Posttranslational modification, protein turnover, chaperones	ATP-dependent serine protease that mediates the selective degradation of mutant and abnormal proteins as well as certain short-lived regulatory proteins. Required for cellular homeostasis and for survival from DNA damage and developmental changes induced by stress. Degrades polypeptides processively to yield small peptide fragments that are 5 to 10 amino acids long. Binds to DNA in a double-stran…
TRINITY_DN16219_c0_g1	7955.ENSDARP00000010728	62.4	3.3e-79	ENOG410YQC4	T	Signal transduction mechanisms	Cytokine that binds to TNFRSF1A TNFR1 and TNFRSF1B TNFBR. It is mainly secreted by macrophages and can induce cell death of certain tumor cell lines. It is potent pyrogen causing fever by direct action or by stimulation of interleukin-1 secretion and is implicated in the induction of cachexia, Under certain conditions it can stimulate cell proliferation and induce cell differentiation
TRINITY_DN16222_c0_g1	9606.ENSP00000309830	100	1.2e-26	ENOG4112229	J	Translation, ribosomal structure and biogenesis	Ribosomal protein L38
TRINITY_DN16223_c0_g1	4113.PGSC0003DMT400047810	71.2	2.2e-35	ENOG41128UX	S	Function unknown	NA
TRINITY_DN16225_c0_g1	7955.ENSDARP00000033600	96.9	1.5e-27	COG2058	J	Translation, ribosomal structure and biogenesis	Ribosomal protein
TRINITY_DN16226_c0_g1	7955.ENSDARP00000091557	73.5	0	COG5640	O	Posttranslational modification, protein turnover, chaperones	protease
TRINITY_DN16227_c0_g1	4113.PGSC0003DMT400036638	40.3	3e-70	ENOG410XQ54	S	Function unknown	F-box and leucine-rich repeat protein
TRINITY_DN16229_c0_g1	29760.VIT_07s0005g00630.t01	77.8	3e-229	ENOG410XP18	S	Function unknown	Poly (ADP-ribose) polymerase
TRINITY_DN16231_c0_g1	7955.ENSDARP00000052382	81.3	2e-104	ENOG4111IRY	S	Function unknown	tetraspanin
TRINITY_DN16232_c0_g1	3847.GLYMA15G13010.1	43.8	4.7e-78	ENOG410XSTA	S	Function unknown	CWC25 spliceosome-associated protein homolog (S. cerevisiae)
TRINITY_DN16235_c0_g1	29760.VIT_14s0006g02160.t01	45.2	1.2e-76	ENOG4111PH9	S	Function unknown	methyltransferase
TRINITY_DN16236_c0_g1	7739.JGI90034	39.7	1.4e-06	COG2124	Q	Secondary metabolites biosynthesis, transport and catabolism	Cytochrome p450
TRINITY_DN16236_c0_g2	240176.XP_001839826.2	50	1.6e-15	COG2124	Q	Secondary metabolites biosynthesis, transport and catabolism	Cytochrome p450
TRINITY_DN16237_c0_g1	4081.Solyc03g121340.1.1	71.7	8e-17	ENOG410Z9HU	S	Function unknown	NA
TRINITY_DN16239_c0_g1	29760.VIT_00s0207g00140.t01	64.3	1.1e-43	ENOG410YR55	S	Function unknown	NA
TRINITY_DN16247_c0_g2	3847.GLYMA10G32380.1	100	9.2e-214	ENOG410XNV7	O	Posttranslational modification, protein turnover, chaperones	aspartic
TRINITY_DN16251_c0_g1	7955.ENSDARP00000025466	96	1.5e-32	COG0459	O	Posttranslational modification, protein turnover, chaperones	Prevents misfolding and promotes the refolding and proper assembly of unfolded polypeptides generated under stress conditions (By similarity)
TRINITY_DN16251_c0_g2	7955.ENSDARP00000025466	100	3.5e-38	COG0459	O	Posttranslational modification, protein turnover, chaperones	Prevents misfolding and promotes the refolding and proper assembly of unfolded polypeptides generated under stress conditions (By similarity)
TRINITY_DN16252_c0_g1	29760.VIT_07s0129g00370.t01	46.8	6e-36	ENOG410ZAC3	S	Function unknown	expressed protein
TRINITY_DN16254_c0_g2	4113.PGSC0003DMT400022871	72.2	6e-69	COG0222	J	Translation, ribosomal structure and biogenesis	Seems to be the binding site for several of the factors involved in protein synthesis and appears to be essential for accurate translation (By similarity)
TRINITY_DN16258_c0_g4	3847.GLYMA13G35170.1	95.6	2.6e-15	ENOG4111QP9	S	Function unknown	proton pump interactor
TRINITY_DN16259_c0_g2	4081.Solyc09g090410.2.1	79.8	6.9e-44	COG0227	J	Translation, ribosomal structure and biogenesis	50s ribosomal protein L28
TRINITY_DN16260_c0_g1	3847.GLYMA06G02330.1	100	2.7e-41	ENOG410XP5G	S	Function unknown	Methyltransferase
TRINITY_DN16260_c0_g2	3847.GLYMA06G02330.1	99	2.7e-53	ENOG410XP5G	S	Function unknown	Methyltransferase
TRINITY_DN16265_c0_g1	29760.VIT_16s0039g00610.t01	66.7	1.8e-47	ENOG410XPET	T	Signal transduction mechanisms	dual-specificity tyrosine-(Y)-phosphorylation regulated kinase
TRINITY_DN16275_c0_g2	31234.CRE02154	94.7	8.6e-36	ENOG4111EBZ	U	Intracellular trafficking, secretion, and vesicular transport	ZP
TRINITY_DN16282_c0_g2	3694.POPTR_0002s22900.1	53.6	6e-44	ENOG410YNXG	S	Function unknown	domain protein
TRINITY_DN16283_c1_g2	7955.ENSDARP00000045068	98.9	2.8e-46	ENOG410XSI5	O	Posttranslational modification, protein turnover, chaperones	surfactant protein B
TRINITY_DN16283_c1_g4	7955.ENSDARP00000045068	89.6	2.8e-34	ENOG410XSI5	O	Posttranslational modification, protein turnover, chaperones	surfactant protein B
TRINITY_DN16283_c1_g5	7955.ENSDARP00000045068	100	1e-36	ENOG410XSI5	O	Posttranslational modification, protein turnover, chaperones	surfactant protein B
TRINITY_DN16285_c0_g1	4558.Sb09g022450.1	80.6	9.5e-64	COG0545	O	Posttranslational modification, protein turnover, chaperones	Peptidyl-prolyl cis-trans isomerase
TRINITY_DN16286_c0_g1	4113.PGSC0003DMT400018507	39	5.9e-12	ENOG410XP06	S	Function unknown	Phosphatidylinositol 4-kinase type
TRINITY_DN16287_c0_g5	29760.VIT_11s0103g00630.t01	71.2	2.4e-18	ENOG410Y3AQ	S	Function unknown	NA
TRINITY_DN16288_c0_g6	29760.VIT_02s0012g02540.t01	62	2e-08	ENOG410Z7Z7	S	Function unknown	Pentatricopeptide repeat-containing protein
TRINITY_DN16291_c0_g1	9606.ENSP00000380156	100	2.5e-69	COG1717	J	Translation, ribosomal structure and biogenesis	(ribosomal) protein
TRINITY_DN16293_c0_g2	3847.GLYMA04G05330.1	66.7	3.7e-10	ENOG410XZYE	S	Function unknown	Far upstream element (FUSE) binding protein
TRINITY_DN16294_c0_g2	9606.ENSP00000419425	100	1.5e-46	COG0652	O	Posttranslational modification, protein turnover, chaperones	peptidyl-prolyl cis-trans isomerase activity
TRINITY_DN16294_c0_g3	9601.ENSPPYP00000019709	95.4	1.1e-42	COG0652	O	Posttranslational modification, protein turnover, chaperones	peptidyl-prolyl cis-trans isomerase activity
TRINITY_DN16301_c0_g1	7955.ENSDARP00000062586	89.3	1.4e-33	COG5048	S	Function unknown	Zinc finger protein
TRINITY_DN16301_c0_g2	7955.ENSDARP00000062586	86.7	3.3e-33	COG5048	S	Function unknown	Zinc finger protein
TRINITY_DN16301_c0_g4	7955.ENSDARP00000062586	100	8.7e-18	COG5048	S	Function unknown	Zinc finger protein
TRINITY_DN16302_c0_g1	4081.Solyc11g061700.1.1	62	4.5e-15	COG3533	S	Function unknown	Secreted protein
TRINITY_DN16304_c0_g2	29760.VIT_18s0089g01180.t01	78.9	4.1e-16	ENOG4112ANT	S	Function unknown	NA
TRINITY_DN16305_c0_g2	7955.ENSDARP00000006228	86.7	5.9e-24	ENOG4111FT1	T	Signal transduction mechanisms	protein phosphatase 1, regulatory subunit
TRINITY_DN16311_c0_g1	7955.ENSDARP00000113767	66.2	3.7e-70	COG2304	S	Function unknown	von Willebrand factor, type A
TRINITY_DN16311_c0_g2	99883.ENSTNIP00000014054	61.3	4e-20	COG2304	S	Function unknown	von Willebrand factor, type A
TRINITY_DN16313_c0_g2	10090.ENSMUSP00000003066	100	2.6e-51	ENOG4111MYC	Z	Cytoskeleton	Mediates the binding, internalization, and catabolism of lipoprotein particles. It can serve as a ligand for the LDL (apo B E) receptor and for the specific apo-E receptor (chylomicron remnant) of hepatic tissues
TRINITY_DN16314_c0_g1	4081.Solyc03g112810.2.1	85.4	1.6e-67	ENOG4111F79	O	Posttranslational modification, protein turnover, chaperones	translocase of inner mitochondrial membrane domain containing 1
TRINITY_DN16318_c0_g2	4081.Solyc09g082120.2.1	76.9	1.1e-57	ENOG411217K	S	Function unknown	Glyoxalase/Bleomycin resistance protein/Dioxygenase superfamily
TRINITY_DN16320_c1_g1	7955.ENSDARP00000094648	69.6	2.8e-56	ENOG4111CPD	O	Posttranslational modification, protein turnover, chaperones	CD46 molecule, complement regulatory protein
TRINITY_DN16320_c1_g2	7955.ENSDARP00000121595	58.8	2.9e-24	ENOG4111CPD	O	Posttranslational modification, protein turnover, chaperones	CD46 molecule, complement regulatory protein
TRINITY_DN16321_c0_g1	4081.Solyc05g008900.2.1	74.5	3.1e-78	ENOG410YGJD	S	Function unknown	fiber protein Fb34
TRINITY_DN16325_c0_g1	7955.ENSDARP00000064557	100	2.5e-39	COG1503	J	Translation, ribosomal structure and biogenesis	Peptide Chain Release Factor
TRINITY_DN16326_c0_g1	3847.GLYMA01G18780.1	100	2.8e-30	ENOG4111JBG	K	Transcription	Component of the nascent polypeptide-associated complex (NAC), a dynamic component of the ribosomal exit tunnel, protecting the emerging polypeptides from interaction with other cytoplasmic proteins to ensure appropriate nascent protein targeting (By similarity). The NAC complex also promotes mitochondrial protein import by enhancing productive ribosome interactions with the outer mitochondrial m…
TRINITY_DN16334_c0_g1	7955.ENSDARP00000019044	96.2	3.3e-38	ENOG410XQA9	T	Signal transduction mechanisms	protein kinase activity
TRINITY_DN16339_c1_g1	3847.GLYMA12G03470.1	100	4.3e-40	COG1278	K	Transcription	Cold shock protein
TRINITY_DN16344_c0_g4	7955.ENSDARP00000124587	100	1.4e-32	COG5215	U	Intracellular trafficking, secretion, and vesicular transport	Importin
TRINITY_DN16345_c0_g1	7955.ENSDARP00000078994	86.4	2.2e-29	ENOG410YMJD	K	Transcription	Regulator of G-protein signaling
TRINITY_DN16347_c0_g2	3847.GLYMA20G26440.1	98.9	2.3e-51	COG1064	C	Energy production and conversion	alcohol dehydrogenase
TRINITY_DN16349_c0_g1	3847.GLYMA02G16890.2	73.1	5.3e-78	ENOG4112D1V	S	Function unknown	auxin-binding protein
TRINITY_DN16350_c0_g1	3694.POPTR_0008s09430.1	67.6	3e-37	COG0457	S	Function unknown	repeat-containing protein
TRINITY_DN16351_c0_g1	7955.ENSDARP00000060361	62.6	1.1e-40	ENOG410YMSK	U	Intracellular trafficking, secretion, and vesicular transport	interleukin 10 receptor, alpha
TRINITY_DN16358_c0_g1	3694.POPTR_0012s01160.1	60.1	7.5e-95	ENOG4111GPA	G	Carbohydrate transport and metabolism	chitinase
TRINITY_DN16362_c0_g1	39946.BGIOSGA006344-PA	100	1.9e-206	COG0296	G	Carbohydrate transport and metabolism	Catalyzes the formation of the alpha-1,6-glucosidic linkages in glycogen by scission of a 1,4-alpha-linked oligosaccharide from growing alpha-1,4-glucan chains and the subsequent attachment of the oligosaccharide to the alpha-1,6 position (By similarity)
TRINITY_DN16365_c0_g1	7955.ENSDARP00000063358	78.9	7.6e-16	ENOG410XRV1	O	Posttranslational modification, protein turnover, chaperones	UnCoupling Protein
TRINITY_DN1636_c0_g1	3847.GLYMA02G11020.1	100	4.9e-14	ENOG4111X07	S	Function unknown	allene oxide cyclase
TRINITY_DN16371_c0_g1	7955.ENSDARP00000071978	80.2	1.6e-161	ENOG410XRW9	U	Intracellular trafficking, secretion, and vesicular transport	Receptor
TRINITY_DN16375_c0_g1	5306.JGI69711	48.9	4.5e-15	COG0488	S	Function unknown	(ABC) transporter
TRINITY_DN16375_c0_g2	486041.XP_001878516.1	84.6	1e-49	COG0488	S	Function unknown	(ABC) transporter
TRINITY_DN16375_c0_g3	578458.XP_003036264.1	87.2	2.9e-79	COG0488	S	Function unknown	(ABC) transporter
TRINITY_DN16382_c0_g1	3694.POPTR_0018s10460.1	86.3	2.4e-134	COG2115	G	Carbohydrate transport and metabolism	Xylose isomerase
TRINITY_DN16385_c0_g1	59689.fgenesh2_kg.5__1526__AT3G51790.1	66.5	3.6e-75	COG2332	O	Posttranslational modification, protein turnover, chaperones	Heme chaperone required for the biogenesis of c-type cytochromes. Transiently binds heme delivered by CcmC and transfers the heme to apo-cytochromes in a process facilitated by CcmF and CcmH (By similarity)
TRINITY_DN16387_c0_g1	4081.Solyc11g008360.1.1	80.8	9.4e-151	COG1187	J	Translation, ribosomal structure and biogenesis	pseudouridine synthase activity
TRINITY_DN16392_c0_g2	59689.fgenesh1_pm.C_scaffold_1003575	42.9	5.8e-15	COG0035	F	Nucleotide transport and metabolism	Catalyzes the conversion of uracil and 5-phospho-alpha- D-ribose 1-diphosphate (PRPP) to UMP and diphosphate (By similarity)
TRINITY_DN16392_c0_g2	59689.fgenesh1_pm.C_scaffold_1003575	42.9	5.8e-15	COG0572	F	Nucleotide transport and metabolism	uridine kinase
TRINITY_DN16393_c0_g1	3694.POPTR_0014s17830.1	81.7	4.3e-25	COG1132	V	Defense mechanisms	(ABC) transporter
TRINITY_DN16394_c1_g1	29760.VIT_06s0004g03830.t01	81.3	2.9e-141	ENOG410YAXH	G	Carbohydrate transport and metabolism	chitinase
TRINITY_DN16395_c0_g1	4113.PGSC0003DMT400050760	55.1	1.6e-17	ENOG410XNRE	S	Function unknown	Tubulin, gamma complex associated protein 2
TRINITY_DN16396_c0_g3	4113.PGSC0003DMT400009444	54.1	1.7e-23	ENOG41121N2	O	Posttranslational modification, protein turnover, chaperones	zinc ion binding
TRINITY_DN16398_c0_g1	3694.POPTR_0002s03240.1	46.3	1.3e-80	ENOG410XPMQ	K	Transcription	homeobox
TRINITY_DN163_c0_g1	39946.BGIOSGA012398-PA	100	2.3e-16	COG0631	T	Signal transduction mechanisms	Phosphatase
TRINITY_DN16400_c0_g1	3847.GLYMA18G14801.1	91.9	1.5e-20	ENOG411279J	S	Function unknown	Reactive oxygen species modulator 1
TRINITY_DN16403_c0_g1	29760.VIT_08s0040g00300.t01	62.9	3.7e-15	ENOG410ZGCP	S	Function unknown	50S ribosomal protein 5
TRINITY_DN16405_c0_g1	29760.VIT_00s0194g00220.t01	52.3	1e-18	ENOG410Z27R	S	Function unknown	NA
TRINITY_DN16407_c0_g2	7955.ENSDARP00000060055	100	1.9e-73	COG0149	G	Carbohydrate transport and metabolism	triosephosphate isomerase
TRINITY_DN16408_c0_g2	9606.ENSP00000435777	100	1.1e-71	COG0184	J	Translation, ribosomal structure and biogenesis	Forms an intersubunit bridge (bridge B4) with the 23S rRNA of the 50S subunit in the ribosome (By similarity)
TRINITY_DN16410_c0_g1	7955.ENSDARP00000114302	78.8	1.2e-36	NA	NA	NA	NA
TRINITY_DN16410_c0_g3	7955.ENSDARP00000119693	97.8	4.9e-46	ENOG410YKQK	S	Function unknown	grancalcin, EF-hand calcium binding protein
TRINITY_DN16415_c0_g2	29760.VIT_03s0038g02880.t01	39.3	5.7e-09	ENOG410Z4FJ	S	Function unknown	NA
TRINITY_DN16416_c0_g1	29760.VIT_08s0007g06340.t01	60.6	1.1e-58	ENOG410YTD2	S	Function unknown	NA
TRINITY_DN16420_c0_g1	3694.POPTR_0004s17450.1	80.6	5.3e-115	ENOG4111IXC	F	Nucleotide transport and metabolism	nucleosidase
TRINITY_DN16421_c0_g1	4113.PGSC0003DMT400018883	78.2	6.3e-195	ENOG410XQZ5	S	Function unknown	RNA binding motif protein 19
TRINITY_DN16423_c0_g2	7955.ENSDARP00000059320	100	1e-29	ENOG4111M3B	U	Intracellular trafficking, secretion, and vesicular transport	Epithelial cell adhesion molecule
TRINITY_DN16427_c0_g1	4641.GSMUA_Achr1P03970_001	49.4	2.7e-106	ENOG410XQWZ	T	Signal transduction mechanisms	WNK lysine deficient protein kinase
TRINITY_DN16432_c0_g1	29760.VIT_01s0010g01000.t01	80.9	3e-61	ENOG410ZS46	T	Signal transduction mechanisms	NSP-interacting kinase
TRINITY_DN16436_c0_g1	3847.GLYMA16G26480.1	64.1	6.1e-34	ENOG41116TK	U	Intracellular trafficking, secretion, and vesicular transport	lipid transfer-like protein
TRINITY_DN16438_c0_g4	39946.BGIOSGA007410-PA	100	4.7e-98	COG0652	O	Posttranslational modification, protein turnover, chaperones	peptidyl-prolyl cis-trans isomerase activity
TRINITY_DN16440_c0_g2	7955.ENSDARP00000061273	95.5	7.7e-49	COG4901	J	Translation, ribosomal structure and biogenesis	Ribosomal protein S25
TRINITY_DN16440_c0_g3	7955.ENSDARP00000061273	96.7	2.2e-56	COG4901	J	Translation, ribosomal structure and biogenesis	Ribosomal protein S25
TRINITY_DN16444_c0_g1	29760.VIT_11s0016g00500.t01	73.9	5.3e-39	ENOG410YYZF	S	Function unknown	- Auxin-responsive SAUR gene family member, expressed
TRINITY_DN16445_c0_g2	39947.LOC_Os05g29174.1	66.3	2.2e-30	COG2801	L	Replication, recombination and repair	Retrotransposon protein
TRINITY_DN16445_c0_g3	39947.LOC_Os03g12600.1	71.4	8.5e-32	COG2801	L	Replication, recombination and repair	Retrotransposon protein
TRINITY_DN16449_c0_g1	4081.Solyc10g079000.1.1	85.6	3.4e-83	ENOG410XR8B	S	Function unknown	transmembrane and coiled-coil domains 1
TRINITY_DN16453_c0_g2	4113.PGSC0003DMT400045906	42.3	4.5e-54	ENOG410YGKS	S	Function unknown	ninja-family protein
TRINITY_DN16455_c0_g1	7955.ENSDARP00000074623	100	1.9e-30	ENOG4111NJ8	A	RNA processing and modification	serine arginine-rich splicing factor
TRINITY_DN16458_c0_g1	29760.VIT_11s0016g02410.t01	54	3.2e-41	ENOG410YK2X	K	Transcription	Transcription factor
TRINITY_DN16458_c0_g2	29760.VIT_03s0088g00630.t01	60.8	8e-19	ENOG410YZ75	S	Function unknown	NA
TRINITY_DN16460_c0_g1	29760.VIT_05s0020g00450.t01	51.1	8.7e-193	ENOG410YFUA	L	Replication, recombination and repair	DNA cytosine-5,-methyltransferase
TRINITY_DN16461_c1_g1	39947.LOC_Os01g28910.1	33.3	8.2e-09	NA	NA	NA	NA
TRINITY_DN16467_c1_g2	3694.POPTR_0013s06370.1	82.9	1.3e-85	ENOG410XTFH	S	Function unknown	Exostosin
TRINITY_DN16467_c1_g5	3847.GLYMA15G43065.1	84	7.3e-51	ENOG410XP1S	S	Function unknown	solute carrier family 35 member
TRINITY_DN16468_c0_g1	9315.ENSMEUP00000000906	90.1	1.1e-33	COG5099	J	Translation, ribosomal structure and biogenesis	pumilio homolog
TRINITY_DN16471_c0_g1	4081.Solyc03g112910.2.1	87.2	2.7e-15	COG5146	H	Coenzyme transport and metabolism	PaNtothenate Kinase
TRINITY_DN16476_c0_g2	6238.CBG05057	58	8.8e-16	ENOG410XS6A	Z	Cytoskeleton	Troponin T type
TRINITY_DN16477_c0_g2	3847.GLYMA01G38470.1	100	6.6e-42	ENOG410XS81	O	Posttranslational modification, protein turnover, chaperones	ubiquitin-conjugating enzyme
TRINITY_DN16478_c0_g1	31033.ENSTRUP00000029502	89.8	7e-85	COG0080	J	Translation, ribosomal structure and biogenesis	This protein binds directly to 23S ribosomal RNA (By similarity)
TRINITY_DN16478_c0_g2	9593.ENSGGOP00000000636	100	1e-101	COG0080	J	Translation, ribosomal structure and biogenesis	This protein binds directly to 23S ribosomal RNA (By similarity)
TRINITY_DN16479_c0_g1	4081.Solyc12g099770.1.1	79.2	9.8e-50	ENOG4111PPH	U	Intracellular trafficking, secretion, and vesicular transport	fission 1
TRINITY_DN16483_c0_g1	54126.PPA26399	46.5	2e-10	ENOG4111B7I	S	Function unknown	NA
TRINITY_DN16486_c0_g1	7955.ENSDARP00000026575	97.8	1e-43	ENOG4111IHM	S	Function unknown	RNA binding motif protein 8A
TRINITY_DN1648_c0_g1	39946.BGIOSGA030112-PA	100	3e-28	NA	NA	NA	NA
TRINITY_DN16493_c0_g1	59689.fgenesh2_kg.4__2659__AT2G44680.1	70.9	6e-75	COG5041	D	Cell cycle control, cell division, chromosome partitioning	casein kinase ii
TRINITY_DN16493_c0_g1	59689.fgenesh2_kg.4__2659__AT2G44680.1	70.9	6e-75	COG5041	K	Transcription	casein kinase ii
TRINITY_DN16493_c0_g1	59689.fgenesh2_kg.4__2659__AT2G44680.1	70.9	6e-75	COG5041	T	Signal transduction mechanisms	casein kinase ii
TRINITY_DN16494_c0_g4	29760.VIT_08s0007g07070.t01	88.9	5.8e-83	ENOG410XNTI	L	Replication, recombination and repair	purine NTP-dependent helicase activity
TRINITY_DN16495_c0_g1	7955.ENSDARP00000115482	97.9	1.3e-47	COG2126	J	Translation, ribosomal structure and biogenesis	Binds to the 23S rRNA (By similarity)
TRINITY_DN16495_c0_g2	9606.ENSP00000274242	100	7.3e-48	COG2126	J	Translation, ribosomal structure and biogenesis	Binds to the 23S rRNA (By similarity)
TRINITY_DN16496_c0_g1	29760.VIT_02s0025g01290.t01	73.5	6.7e-85	COG3571	S	Function unknown	Hydrolase of the alpha beta-hydrolase
TRINITY_DN16501_c0_g1	29760.VIT_14s0060g01540.t01	80.1	1.2e-134	COG5325	U	Intracellular trafficking, secretion, and vesicular transport	SYNtaxin
TRINITY_DN16505_c0_g1	3694.POPTR_0001s24900.1	68.6	2.3e-118	COG5140	O	Posttranslational modification, protein turnover, chaperones	Ubiquitin fusion degradation protein
TRINITY_DN16508_c0_g2	39946.BGIOSGA023532-PA	100	2e-60	COG2273	G	Carbohydrate transport and metabolism	hydrolase family 16
TRINITY_DN16508_c0_g4	39946.BGIOSGA017422-PA	100	1.8e-15	ENOG410YBFU	G	Carbohydrate transport and metabolism	xyloglucan endotransglucosylase hydrolase protein
TRINITY_DN16509_c0_g1	4081.Solyc02g065470.1.1	71.2	1.1e-59	COG2340	S	Function unknown	Scp-like extracellular
TRINITY_DN16510_c1_g1	3694.POPTR_0008s12150.1	52.4	2.7e-52	ENOG41118E5	S	Function unknown	NA
TRINITY_DN16513_c0_g1	59689.fgenesh2_kg.3__2214__AT3G19950.1	50.7	3e-73	ENOG41121N2	O	Posttranslational modification, protein turnover, chaperones	zinc ion binding
TRINITY_DN16515_c0_g1	3694.POPTR_0010s20300.1	77.8	4.8e-62	COG0071	O	Posttranslational modification, protein turnover, chaperones	response to heat
TRINITY_DN16518_c0_g1	7955.ENSDARP00000035273	100	4e-71	COG0048	J	Translation, ribosomal structure and biogenesis	Interacts with and stabilizes bases of the 16S rRNA that are involved in tRNA selection in the A site and with the mRNA backbone. Located at the interface of the 30S and 50S subunits, it traverses the body of the 30S subunit contacting proteins on the other side and probably holding the rRNA structure together. The combined cluster of proteins S8, S12 and S17 appears to hold together the shoulder…
TRINITY_DN16519_c0_g1	3694.POPTR_0001s34030.1	66.9	2.9e-20	ENOG410YVEP	S	Function unknown	NA
TRINITY_DN16520_c0_g1	59689.Al_scaffold_0001_538	49.2	4.9e-07	ENOG410ZCI1	S	Function unknown	NA
TRINITY_DN16524_c0_g2	3847.GLYMA08G46020.1	100	9e-32	COG0612	O	Posttranslational modification, protein turnover, chaperones	peptidase'
TRINITY_DN16528_c0_g1	7955.ENSDARP00000041876	85.5	3.6e-27	ENOG410XREB	S	Function unknown	cysteine-serine-rich nuclear protein
TRINITY_DN16528_c0_g4	7955.ENSDARP00000041876	73.3	1e-30	ENOG410XREB	S	Function unknown	cysteine-serine-rich nuclear protein
TRINITY_DN16529_c0_g1	69293.ENSGACP00000012719	46.4	4.8e-19	ENOG410XR10	S	Function unknown	Domain of Unknown Function (DUF1081)
TRINITY_DN16531_c0_g1	7955.ENSDARP00000075363	100	2.5e-51	COG1631	J	Translation, ribosomal structure and biogenesis	Ribosomal protein
TRINITY_DN16531_c0_g2	9606.ENSP00000404375	93.2	2.8e-57	COG1631	J	Translation, ribosomal structure and biogenesis	Ribosomal protein
TRINITY_DN16532_c0_g1	29760.VIT_05s0062g00910.t01	81.4	6.1e-45	COG0762	S	Function unknown	integral membrane protein
TRINITY_DN16534_c0_g1	7955.ENSDARP00000113859	71.1	5.3e-35	ENOG410XR6S	S	Function unknown	Granulin
TRINITY_DN16535_c0_g1	4113.PGSC0003DMT400034501	70.2	9.9e-144	COG0673	S	Function unknown	oxidoreductase
TRINITY_DN16537_c0_g1	7955.ENSDARP00000038723	86.1	2.5e-99	ENOG4111V4J	O	Posttranslational modification, protein turnover, chaperones	negative regulation of signal transduction
TRINITY_DN16538_c0_g1	4538.ORGLA06G0158100.1	99.8	1.6e-219	COG0625	O	Posttranslational modification, protein turnover, chaperones	glutathione Stransferase
TRINITY_DN16541_c0_g1	3847.GLYMA05G04170.1	83	6.5e-36	COG2608	S	Function unknown	heavy metal transport detoxification protein
TRINITY_DN16542_c0_g2	8049.ENSGMOP00000008472	84.9	1e-32	COG5069	Z	Cytoskeleton	Microtubule associated monoxygenase, calponin and LIM domain containing
TRINITY_DN16542_c0_g3	7955.ENSDARP00000000803	100	1.3e-24	COG5069	Z	Cytoskeleton	Microtubule associated monoxygenase, calponin and LIM domain containing
TRINITY_DN16542_c0_g5	7955.ENSDARP00000000803	100	3.2e-35	COG5069	Z	Cytoskeleton	Microtubule associated monoxygenase, calponin and LIM domain containing
TRINITY_DN16544_c0_g2	29760.VIT_07s0005g03910.t01	85.1	1.6e-54	ENOG410Y9CF	S	Function unknown	Acyl-transferase
TRINITY_DN16548_c0_g1	3694.POPTR_0006s01040.1	94.8	2.4e-128	COG0638	O	Posttranslational modification, protein turnover, chaperones	The proteasome is a multicatalytic proteinase complex which is characterized by its ability to cleave peptides with Arg, Phe, Tyr, Leu, and Glu adjacent to the leaving group at neutral or slightly basic pH. The proteasome has an ATP-dependent proteolytic activity (By similarity)
TRINITY_DN16552_c0_g3	7955.ENSDARP00000091948	88.1	2.3e-24	ENOG410ZUE5	A	RNA processing and modification	TNF receptor-associated factor 1
TRINITY_DN16557_c0_g2	29760.VIT_19s0014g02370.t01	87.9	2.2e-76	COG1250	I	Lipid transport and metabolism	Dehydrogenase
TRINITY_DN16558_c0_g1	6238.CBG01968	55.4	1.1e-09	COG0235	G	Carbohydrate transport and metabolism	Class II aldolase adducin
TRINITY_DN16561_c0_g1	3694.POPTR_0010s17540.1	48.8	2.1e-40	ENOG41121N2	O	Posttranslational modification, protein turnover, chaperones	zinc ion binding
TRINITY_DN16564_c0_g1	3694.POPTR_0003s20500.1	61.8	7.3e-13	COG3533	S	Function unknown	Secreted protein
TRINITY_DN16565_c0_g1	4081.Solyc07g005550.2.1	65.9	3.8e-86	ENOG4111VTA	S	Function unknown	NA
TRINITY_DN16568_c0_g1	4113.PGSC0003DMT400071832	51	3.3e-16	NA	NA	NA	NA
TRINITY_DN16568_c0_g2	29760.VIT_00s0574g00030.t01	61.7	1.6e-30	ENOG410XV78	O	Posttranslational modification, protein turnover, chaperones	RING finger protein 4
TRINITY_DN16570_c0_g1	4113.PGSC0003DMT400010908	63.2	9e-27	ENOG4111J16	S	Function unknown	serine arginine-rich splicing factor
TRINITY_DN16575_c0_g1	9478.ENSTSYP00000002137	99.4	2.3e-62	COG2075	J	Translation, ribosomal structure and biogenesis	Ribosomal protein
TRINITY_DN16575_c0_g2	9478.ENSTSYP00000002137	94.3	7.3e-51	COG2075	J	Translation, ribosomal structure and biogenesis	Ribosomal protein
TRINITY_DN16575_c0_g3	9478.ENSTSYP00000002137	93.2	4.1e-50	COG2075	J	Translation, ribosomal structure and biogenesis	Ribosomal protein
TRINITY_DN16578_c0_g3	7955.ENSDARP00000104575	100	2.5e-35	COG0459	O	Posttranslational modification, protein turnover, chaperones	Prevents misfolding and promotes the refolding and proper assembly of unfolded polypeptides generated under stress conditions (By similarity)
TRINITY_DN16578_c0_g4	7955.ENSDARP00000104575	97.6	2.7e-35	COG0459	O	Posttranslational modification, protein turnover, chaperones	Prevents misfolding and promotes the refolding and proper assembly of unfolded polypeptides generated under stress conditions (By similarity)
TRINITY_DN16579_c0_g1	7955.ENSDARP00000109065	74.5	2.9e-42	ENOG410YTDG	O	Posttranslational modification, protein turnover, chaperones	Component of the class I major histocompatibility complex (MHC). Involved in the presentation of peptide antigens to the immune system (By similarity)
TRINITY_DN16583_c1_g1	4081.Solyc08g066530.2.1	60.9	8.8e-88	ENOG410YCRN	S	Function unknown	Acid phosphatase
TRINITY_DN16587_c0_g1	3847.GLYMA03G32950.4	99.1	2.1e-46	ENOG410XQ37	J	Translation, ribosomal structure and biogenesis	Component of the eukaryotic translation initiation factor 3 (eIF-3) complex, which is involved in protein synthesis and, together with other initiation factors, stimulates binding of mRNA and methionyl-tRNAi to the 40S ribosome (By similarity)
TRINITY_DN16590_c0_g1	3694.POPTR_0019s13300.1	80.6	3.1e-116	ENOG410YA5Q	G	Carbohydrate transport and metabolism	May cause loosening and extension of plant cell walls by disrupting non-covalent bonding between cellulose microfibrils and matrix glucans. No enzymatic activity has been found. May be required for rapid internodal elongation in deepwater rice during submergence (By similarity)
TRINITY_DN16591_c0_g14	7955.ENSDARP00000003177	100	2.9e-159	ENOG410ZVV2	O	Posttranslational modification, protein turnover, chaperones	Collagen, type I, alpha 1
TRINITY_DN16591_c0_g2	7955.ENSDARP00000091007	93.8	4.8e-07	ENOG41121KM	S	Function unknown	Collagen triple helix repeat
TRINITY_DN16591_c0_g3	7955.ENSDARP00000003177	100	5.6e-51	ENOG410ZVV2	O	Posttranslational modification, protein turnover, chaperones	Collagen, type I, alpha 1
TRINITY_DN16592_c0_g1	69293.ENSGACP00000020976	90.7	2.1e-40	COG2007	J	Translation, ribosomal structure and biogenesis	40S ribosomal protein S8
TRINITY_DN16593_c0_g1	425265.XP_001728955.1	87.5	8.4e-17	ENOG410Y2ES	S	Function unknown	NA
TRINITY_DN16597_c0_g2	3847.GLYMA02G33770.1	100	3.1e-35	ENOG410XQK5	J	Translation, ribosomal structure and biogenesis	Component of the eukaryotic translation initiation factor 3 (eIF-3) complex, which is involved in protein synthesis and, together with other initiation factors, stimulates binding of mRNA and methionyl-tRNAi to the 40S ribosome (By similarity)
TRINITY_DN16600_c0_g2	4113.PGSC0003DMT400049308	88.8	3.3e-54	COG0129	E	Amino acid transport and metabolism	Dihydroxy-acid dehydratase
TRINITY_DN16600_c0_g3	4081.Solyc12g043020.1.1	89.4	7.9e-234	COG0129	E	Amino acid transport and metabolism	Dihydroxy-acid dehydratase
TRINITY_DN16602_c0_g1	4081.Solyc03g062860.1.1	62.4	6.6e-24	ENOG4111YC2	L	Replication, recombination and repair	Tkp5 protein
TRINITY_DN16604_c0_g1	7955.ENSDARP00000120035	76.4	3.3e-109	COG0670	S	Function unknown	Membrane
TRINITY_DN16606_c0_g2	29760.VIT_02s0025g00880.t01	95.3	7.7e-79	ENOG410YD15	S	Function unknown	BTB POZ domain-containing protein
TRINITY_DN16607_c0_g1	4113.PGSC0003DMT400022131	75	3.3e-67	ENOG4111V3V	H	Coenzyme transport and metabolism	photosystem II reaction center
TRINITY_DN16609_c1_g1	29760.VIT_09s0018g01600.t01	86.7	1.6e-63	COG0494	L	Replication, recombination and repair	Nudix hydrolase
TRINITY_DN16612_c0_g1	7955.ENSDARP00000027268	100	2e-34	COG5256	J	Translation, ribosomal structure and biogenesis	This protein promotes the GTP-dependent binding of aminoacyl-tRNA to the A-site of ribosomes during protein biosynthesis (By similarity)
TRINITY_DN16614_c0_g1	29760.VIT_18s0001g00890.t01	83.7	7.7e-12	ENOG410Z7Z7	S	Function unknown	Pentatricopeptide repeat-containing protein
TRINITY_DN16614_c0_g2	29760.VIT_18s0001g00890.t01	55.8	2.4e-52	ENOG410Z7Z7	S	Function unknown	Pentatricopeptide repeat-containing protein
TRINITY_DN16617_c0_g1	4081.Solyc11g008540.1.1	45.3	1.5e-27	COG0571	K	Transcription	Digests double-stranded RNA. Involved in the processing of primary rRNA transcript to yield the immediate precursors to the large and small rRNAs (23S and 16S). Also processes some mRNAs, and tRNAs when they are encoded in the rRNA operon (By similarity)
TRINITY_DN16619_c0_g1	4113.PGSC0003DMT400079639	60.3	1.4e-184	ENOG410XTFH	S	Function unknown	Exostosin
TRINITY_DN16622_c0_g1	4081.Solyc03g118120.2.1	73.9	1.1e-71	ENOG4111MP0	S	Function unknown	NA
TRINITY_DN16625_c0_g1	8128.ENSONIP00000009751	93.5	8.6e-48	COG5051	J	Translation, ribosomal structure and biogenesis	60S ribosomal protein l36
TRINITY_DN16625_c0_g2	9669.ENSMPUP00000006114	99.1	5.3e-51	COG5051	J	Translation, ribosomal structure and biogenesis	60S ribosomal protein l36
TRINITY_DN16625_c0_g3	7955.ENSDARP00000016957	100	4.7e-45	COG5051	J	Translation, ribosomal structure and biogenesis	60S ribosomal protein l36
TRINITY_DN16626_c0_g1	39946.BGIOSGA012909-PA	99.3	3.3e-79	COG2238	J	Translation, ribosomal structure and biogenesis	Ribosomal protein
TRINITY_DN16628_c0_g3	9606.ENSP00000421689	100	1.4e-21	ENOG410XPGP	T	Signal transduction mechanisms	Casein Kinase
TRINITY_DN16631_c0_g1	4533.OB05G31870.1	93.5	7.6e-82	ENOG4111T32	J	Translation, ribosomal structure and biogenesis	protein complex subunit organization
TRINITY_DN16634_c0_g2	29760.VIT_14s0128g00310.t01	62.6	4.7e-93	ENOG410XQZR	O	Posttranslational modification, protein turnover, chaperones	topoisomerase I binding, arginine serine-rich, E3 ubiquitin protein ligase
TRINITY_DN16637_c0_g1	3847.GLYMA10G42650.1	100	9.9e-37	COG0638	O	Posttranslational modification, protein turnover, chaperones	The proteasome is a multicatalytic proteinase complex which is characterized by its ability to cleave peptides with Arg, Phe, Tyr, Leu, and Glu adjacent to the leaving group at neutral or slightly basic pH. The proteasome has an ATP-dependent proteolytic activity (By similarity)
TRINITY_DN16638_c2_g1	3847.GLYMA03G05510.1	100	1.8e-105	ENOG410YZUA	S	Function unknown	Disease resistance response protein
TRINITY_DN16642_c0_g1	3711.Bra031513.1-P	30.6	5.1e-19	ENOG410ZIWC	O	Posttranslational modification, protein turnover, chaperones	nucleoredoxin-like
TRINITY_DN16643_c0_g1	3847.GLYMA03G33340.5	100	2e-136	ENOG410XSIX	O	Posttranslational modification, protein turnover, chaperones	glutathione Stransferase
TRINITY_DN16647_c0_g1	3847.GLYMA16G34300.1	84.5	5.4e-23	ENOG410XP07	J	Translation, ribosomal structure and biogenesis	eukaryotic translation initiation factor 2c
TRINITY_DN16648_c0_g1	135651.CBN19623	46.3	4.3e-07	ENOG410ZAEW	S	Function unknown	Trypsin Inhibitor like cysteine rich domain
TRINITY_DN1664_c0_g1	39946.BGIOSGA013629-PA	100	3.8e-22	ENOG41103VK	S	Function unknown	NA
TRINITY_DN16650_c0_g4	39946.BGIOSGA019114-PA	100	8.8e-15	COG3572	H	Coenzyme transport and metabolism	glutamate--cysteine ligase
TRINITY_DN16653_c0_g2	59689.fgenesh2_kg.3__3412__AT2G18050.1	64.8	1.9e-24	ENOG410XWIM	S	Function unknown	histone h1
TRINITY_DN16657_c0_g1	7955.ENSDARP00000114578	96	4.1e-50	COG2451	J	Translation, ribosomal structure and biogenesis	Ribosomal protein
TRINITY_DN16657_c0_g2	7955.ENSDARP00000114578	99	9.5e-52	COG2451	J	Translation, ribosomal structure and biogenesis	Ribosomal protein
TRINITY_DN16660_c0_g1	29760.VIT_06s0004g02860.t01	55.4	3.5e-28	ENOG41113C5	S	Function unknown	NA
TRINITY_DN16665_c0_g1	7955.ENSDARP00000014978	97.4	1.4e-33	COG0326	O	Posttranslational modification, protein turnover, chaperones	Molecular chaperone. Has ATPase activity (By similarity)
TRINITY_DN16668_c0_g2	4113.PGSC0003DMT400011839	77.7	1.4e-208	ENOG410XRSH	K	Transcription	Scarecrow-like protein
TRINITY_DN16670_c0_g1	4113.PGSC0003DMT400016144	51.8	1.3e-95	ENOG4111IHV	O	Posttranslational modification, protein turnover, chaperones	Ring finger protein
TRINITY_DN16672_c0_g1	4081.Solyc07g008660.2.1	84.8	3e-58	COG0228	J	Translation, ribosomal structure and biogenesis	30s ribosomal protein S16
TRINITY_DN16675_c0_g1	3847.GLYMA13G24440.1	97.1	8.8e-32	COG0071	O	Posttranslational modification, protein turnover, chaperones	response to heat
TRINITY_DN16680_c0_g1	3847.GLYMA09G40890.1	76.3	7.4e-32	ENOG410ZGB6	S	Function unknown	acetyltransferase
TRINITY_DN16680_c0_g2	3694.POPTR_0016s14680.1	86.5	3.9e-43	ENOG410ZGB6	S	Function unknown	acetyltransferase
TRINITY_DN16684_c0_g1	3694.POPTR_0011s02600.1	51.2	2.8e-12	ENOG411195E	S	Function unknown	Conserved gene of
TRINITY_DN16684_c0_g2	29760.VIT_19s0015g01690.t01	65.4	1.2e-116	COG0271	T	Signal transduction mechanisms	Bola-like protein
TRINITY_DN16684_c0_g2	29760.VIT_19s0015g01690.t01	65.4	1.2e-116	COG2166	S	Function unknown	Fe-S metabolism associated
TRINITY_DN16685_c0_g1	3847.GLYMA01G03750.1	100	2.9e-33	ENOG4111IKT	S	Function unknown	DNA-binding protein-related
TRINITY_DN16687_c0_g1	7955.ENSDARP00000002293	56.1	1e-74	ENOG410XU2E	K	Transcription	Produced by activated macrophages, IL-1 stimulates thymocyte proliferation by inducing IL-2 release, B-cell maturation and proliferation, and fibroblast growth factor activity. IL-1 proteins are involved in the inflammatory response, being identified as endogenous pyrogens, and are reported to stimulate the release of prostaglandin and collagenase from synovial cells
TRINITY_DN16690_c0_g1	29760.VIT_12s0034g01820.t01	72.9	1.8e-89	ENOG410Z7Z7	S	Function unknown	Pentatricopeptide repeat-containing protein
TRINITY_DN16692_c0_g1	29760.VIT_03s0088g00370.t01	55.5	9.9e-19	ENOG410YPQF	S	Function unknown	expressed protein
TRINITY_DN16694_c0_g3	3847.GLYMA03G24720.1	55.6	3e-42	COG2801	L	Replication, recombination and repair	Retrotransposon protein
TRINITY_DN16695_c1_g1	4113.PGSC0003DMT400036942	68.5	3.5e-115	COG2227	H	Coenzyme transport and metabolism	Non-specific O-methyltransferase that catalyzes the 2 O- methylation steps in the ubiquinone biosynthetic pathway (By similarity)
TRINITY_DN16696_c0_g2	29760.VIT_00s0665g00030.t01	60	7e-22	ENOG411181N	S	Function unknown	NA
TRINITY_DN16698_c0_g1	29760.VIT_08s0007g02840.t01	64.8	7.4e-212	ENOG410XRSP	S	Function unknown	Leucine zipper-ef-hand containing transmembrane protein
TRINITY_DN16698_c0_g2	29760.VIT_08s0007g02840.t01	63.6	5.8e-80	ENOG410XRSP	S	Function unknown	Leucine zipper-ef-hand containing transmembrane protein
TRINITY_DN16699_c0_g1	4081.Solyc03g121830.1.1	84.2	1.1e-215	COG5092	I	Lipid transport and metabolism	Adds a myristoyl group to the N-terminal glycine residue of certain cellular proteins (By similarity)
TRINITY_DN16700_c0_g1	7955.ENSDARP00000023177	100	5.4e-90	ENOG41122P5	S	Function unknown	actin-depolymerizing factor
TRINITY_DN16702_c0_g2	3847.GLYMA04G04270.1	100	1.3e-83	ENOG410YJ90	S	Function unknown	Transferase family
TRINITY_DN16705_c0_g1	29760.VIT_04s0008g03010.t01	88.3	2.9e-34	COG0017	J	Translation, ribosomal structure and biogenesis	asparaginyl-tRNA synthetase
TRINITY_DN16706_c0_g1	4113.PGSC0003DMT400053241	52.4	4.1e-14	ENOG410YNCK	S	Function unknown	zinc finger
TRINITY_DN16708_c0_g1	29760.VIT_14s0060g00990.t01	67	5.7e-30	ENOG410XS63	S	Function unknown	Exonuclease 3'-5' domain containing 2
TRINITY_DN16713_c0_g1	4081.Solyc09g061270.2.1	52.7	5.3e-38	ENOG410YQD5	S	Function unknown	BSD domain-containing protein
TRINITY_DN16715_c0_g1	4081.Solyc02g069260.2.1	55.1	1.7e-06	ENOG410XP07	J	Translation, ribosomal structure and biogenesis	eukaryotic translation initiation factor 2c
TRINITY_DN16719_c0_g1	29760.VIT_18s0001g15090.t01	90.5	2.3e-13	ENOG410XPD0	S	Function unknown	Ras-related protein
TRINITY_DN16721_c0_g1	3694.POPTR_0013s13900.1	91.5	1.2e-21	ENOG410XRKD	A	RNA processing and modification	PRP6 pre-mRNA processing factor 6 homolog (S. cerevisiae)
TRINITY_DN16723_c0_g1	3847.GLYMA12G01970.1	45.1	7e-29	ENOG410YQ60	S	Function unknown	Pathogenesis-related protein Bet v I family
TRINITY_DN16725_c0_g1	29760.VIT_06s0061g00700.t01	61.7	1.3e-171	ENOG410YW6D	S	Function unknown	function DUF966 domain containing protein, expressed
TRINITY_DN16726_c0_g1	3847.GLYMA08G45440.1	83.8	6.9e-25	ENOG4112B0H	O	Posttranslational modification, protein turnover, chaperones	coiled-coil-helix-coiled-coil-helix domain containing 7
TRINITY_DN16730_c0_g1	29760.VIT_00s0207g00240.t01	63	4.3e-111	ENOG4111PIX	S	Function unknown	Nuclear Autoantigenic Sperm Protein
TRINITY_DN16733_c0_g3	3694.POPTR_0015s09290.1	80.9	4.3e-34	COG2223	P	Inorganic ion transport and metabolism	Transporter
TRINITY_DN16733_c0_g4	3694.POPTR_0012s08950.1	79.3	1e-43	COG2223	P	Inorganic ion transport and metabolism	Transporter
TRINITY_DN16734_c1_g1	4081.Solyc05g017950.2.1	79	1e-175	COG0385	S	Function unknown	bile acid
TRINITY_DN16735_c0_g1	3847.GLYMA07G07190.1	77.3	1.8e-12	ENOG410YD6W	S	Function unknown	NA
TRINITY_DN16739_c0_g1	7955.ENSDARP00000027102	97.9	7.4e-167	ENOG410XQN9	S	Function unknown	nucleosome assembly
TRINITY_DN16741_c0_g1	3694.POPTR_0001s35930.1	75.7	1.6e-82	ENOG4111IRG	O	Posttranslational modification, protein turnover, chaperones	Has a dual role in the assembly of mitochondrial ATPase. Acts as a protease that removes N-terminal residues of mitochondrial ATPase CF(0) subunit 6 at the intermembrane space side. Also involved in the correct assembly of the membrane- embedded ATPase CF(0) particle, probably mediating association of subunit 6 with the subunit 9 ring (By similarity)
TRINITY_DN16743_c0_g1	4081.Solyc02g078220.1.1	48.2	2.4e-239	ENOG410XQIH	S	Function unknown	Protein of unknown function (DUF2921)
TRINITY_DN16749_c0_g1	29760.VIT_12s0057g01240.t01	76.9	2e-157	COG0134	E	Amino acid transport and metabolism	indole-3-glycerol phosphate synthase
TRINITY_DN16752_c0_g2	3847.GLYMA02G00590.1	98.7	1.5e-38	COG1894	C	Energy production and conversion	Nadh dehydrogenase
TRINITY_DN16754_c0_g1	486041.XP_001878516.1	96.3	2.6e-54	COG0488	S	Function unknown	(ABC) transporter
TRINITY_DN16754_c0_g3	578458.XP_003036264.1	89.7	1.3e-48	COG0488	S	Function unknown	(ABC) transporter
TRINITY_DN16754_c0_g4	486041.XP_001878516.1	98.7	7.2e-38	COG0488	S	Function unknown	(ABC) transporter
TRINITY_DN16755_c0_g2	7955.ENSDARP00000065651	64.4	2.7e-47	NA	NA	NA	NA
TRINITY_DN16765_c0_g1	4113.PGSC0003DMT400027242	55.5	2.4e-131	ENOG410YF7S	S	Function unknown	Plant organelle RNA recognition domain
TRINITY_DN16767_c0_g1	3694.POPTR_0006s19200.1	49.8	1.4e-62	ENOG411259Z	S	Function unknown	NA
TRINITY_DN16770_c0_g2	29760.VIT_12s0034g01810.t01	60	1.2e-128	ENOG410Y0IS	S	Function unknown	alkB, alkylation repair homolog 5 (E. coli)
TRINITY_DN16771_c0_g1	4081.Solyc01g107700.2.1	84.1	2.6e-110	COG1878	S	Function unknown	Cyclase family
TRINITY_DN16773_c0_g1	4113.PGSC0003DMT400082747	94.5	5.2e-32	ENOG410XPGP	T	Signal transduction mechanisms	Casein Kinase
TRINITY_DN16774_c0_g2	3694.POPTR_0026s00220.1	57.4	9.9e-06	ENOG410XX9Y	S	Function unknown	NA
TRINITY_DN16775_c0_g1	4113.PGSC0003DMT400009229	97.1	6.8e-75	COG5078	O	Posttranslational modification, protein turnover, chaperones	ubiquitin-conjugating enzyme
TRINITY_DN16776_c0_g1	3847.GLYMA03G37191.1	76.2	1e-07	ENOG41121RT	S	Function unknown	Prostaglandin E synthase 3 (Cytosolic)
TRINITY_DN16776_c1_g1	3847.GLYMA19G39800.1	95.9	5.8e-63	ENOG41121RT	S	Function unknown	Prostaglandin E synthase 3 (Cytosolic)
TRINITY_DN1677_c0_g1	39946.BGIOSGA020717-PA	100	6.8e-36	COG0509	E	Amino acid transport and metabolism	The glycine cleavage system catalyzes the degradation of glycine. The H protein shuttles the methylamine group of glycine from the P protein to the T protein (By similarity)
TRINITY_DN16782_c0_g1	4113.PGSC0003DMT400095293	75.7	0	ENOG410XSNC	S	Function unknown	amine oxidase
TRINITY_DN16783_c0_g2	7955.ENSDARP00000034206	100	4.4e-57	ENOG410XNY0	T	Signal transduction mechanisms	Mitogen-activated protein kinase
TRINITY_DN16786_c0_g2	4113.PGSC0003DMT400073734	76.2	1.8e-54	ENOG41125FV	S	Function unknown	NA
TRINITY_DN16788_c0_g2	4113.PGSC0003DMT400032546	57.8	9.1e-23	ENOG410Z2UE	K	Transcription	homeobox-leucine zipper protein
TRINITY_DN16791_c0_g1	7955.ENSDARP00000033622	100	3e-29	ENOG410XPST	S	Function unknown	Phosphate carrier protein
TRINITY_DN16797_c0_g1	3694.POPTR_0012s02730.1	89.5	7.5e-10	ENOG410XSP5	G	Carbohydrate transport and metabolism	Major Facilitator superfamily
TRINITY_DN16798_c0_g3	7955.ENSDARP00000025616	97.1	2.7e-28	COG2058	J	Translation, ribosomal structure and biogenesis	Ribosomal protein
TRINITY_DN16798_c0_g4	6239.F17C8.2	57.3	1.4e-19	ENOG410XNMM	S	Function unknown	collagen, type
TRINITY_DN16801_c0_g1	29760.VIT_17s0000g08410.t01	62.3	8.6e-44	ENOG4111P8A	S	Function unknown	peroxisomal biogenesis factor 14
TRINITY_DN16801_c0_g2	59689.fgenesh2_kg.8__2280__AT5G62810.1	56	1e-15	ENOG4111P8A	S	Function unknown	peroxisomal biogenesis factor 14
TRINITY_DN16803_c0_g1	3847.GLYMA19G03520.1	100	8.7e-75	COG2238	J	Translation, ribosomal structure and biogenesis	Ribosomal protein
TRINITY_DN16806_c0_g1	4113.PGSC0003DMT400058290	62.8	9.8e-54	ENOG410YSGN	S	Function unknown	NA
TRINITY_DN16807_c0_g1	39946.BGIOSGA026411-PA	100	1.2e-10	ENOG410YRN6	S	Function unknown	Stress responsive protein
TRINITY_DN16807_c0_g2	39946.BGIOSGA026410-PA	96.7	1.4e-32	ENOG4111FUQ	S	Function unknown	NA
TRINITY_DN16808_c0_g1	4081.Solyc06g067870.2.1	64.9	3.3e-119	COG3491	S	Function unknown	2OGFe(II) oxygenase
TRINITY_DN16812_c0_g2	3847.GLYMA13G04670.1	99	2e-48	COG2124	Q	Secondary metabolites biosynthesis, transport and catabolism	Cytochrome p450
TRINITY_DN16816_c0_g2	29760.VIT_08s0032g00620.t01	70.3	1e-96	COG0091	J	Translation, ribosomal structure and biogenesis	The globular domain of the protein is located near the polypeptide exit tunnel on the outside of the subunit, while an extended beta-hairpin is found that lines the wall of the exit tunnel in the center of the 70S ribosome (By similarity)
TRINITY_DN16818_c0_g1	29760.VIT_17s0000g03940.t01	52.9	2.7e-155	COG2124	Q	Secondary metabolites biosynthesis, transport and catabolism	Cytochrome p450
TRINITY_DN16824_c1_g2	29760.VIT_16s0022g01840.t01	63.8	1.6e-71	COG0542	O	Posttranslational modification, protein turnover, chaperones	ATP-dependent CLP protease ATP-binding subunit
TRINITY_DN16825_c0_g4	7955.ENSDARP00000099216	75	3.7e-14	COG1528	P	Inorganic ion transport and metabolism	Stores iron in a soluble, non-toxic, readily available form. Important for iron homeostasis (By similarity)
TRINITY_DN16827_c0_g1	4081.Solyc06g075320.2.1	68.4	8.2e-24	ENOG4111FD7	S	Function unknown	Vicilin-like antimicrobial peptides
TRINITY_DN16827_c0_g3	29760.VIT_08s0007g06710.t01	75.8	3e-155	COG5580	O	Posttranslational modification, protein turnover, chaperones	AHA1, activator of heat shock 90kDa protein ATPase homolog
TRINITY_DN16831_c0_g1	7955.ENSDARP00000090515	60.7	3.9e-58	ENOG410ZHEG	S	Function unknown	NA
TRINITY_DN16832_c1_g1	3847.GLYMA08G23770.1	100	1.5e-38	ENOG410YDRR	S	Function unknown	growth regulator related protein
TRINITY_DN16834_c0_g1	4113.PGSC0003DMT400014547	80.8	4.2e-18	ENOG411248W	S	Function unknown	expressed protein
TRINITY_DN16839_c0_g1	4081.Solyc08g076320.2.1	94.2	1.1e-50	COG1215	M	Cell wall/membrane/envelope biogenesis	Glycosyl transferase, family 2
TRINITY_DN16840_c1_g1	861557.XP_003296835.1	100	1.8e-36	COG0513	L	Replication, recombination and repair	purine NTP-dependent helicase activity
TRINITY_DN16844_c0_g1	7955.ENSDARP00000018594	100	1.4e-55	COG0255	J	Translation, ribosomal structure and biogenesis	50s ribosomal protein l29
TRINITY_DN16844_c0_g2	9606.ENSP00000259469	100	8e-56	COG0255	J	Translation, ribosomal structure and biogenesis	50s ribosomal protein l29
TRINITY_DN16845_c0_g1	9606.ENSP00000335321	100	3.1e-45	COG5181	A	RNA processing and modification	Splicing factor 3b subunit
TRINITY_DN16846_c0_g1	3694.POPTR_0001s20660.1	78.6	3e-85	ENOG410XT0M	S	Function unknown	RWD domain containing
TRINITY_DN16849_c0_g2	29760.VIT_18s0001g03150.t01	63.8	7e-45	COG3703	P	Inorganic ion transport and metabolism	cation transport
TRINITY_DN16850_c0_g2	3847.GLYMA09G12252.1	100	2.6e-07	NA	NA	NA	NA
TRINITY_DN16851_c0_g1	4081.Solyc02g094210.1.1	81.2	4.1e-27	ENOG410YTPC	S	Function unknown	expressed protein
TRINITY_DN16854_c0_g1	29760.VIT_08s0040g01430.t01	76.2	1.5e-40	ENOG4111UG5	S	Function unknown	Membrane magnesium transporter
TRINITY_DN16856_c0_g1	29760.VIT_14s0006g02880.t01	63.2	1.5e-82	ENOG41100EE	S	Function unknown	NA
TRINITY_DN16857_c0_g2	4113.PGSC0003DMT400078796	73.3	2.1e-11	NA	NA	NA	NA
TRINITY_DN16861_c0_g1	3847.GLYMA03G36420.1	100	6e-28	COG2053	J	Translation, ribosomal structure and biogenesis	Ribosomal protein
TRINITY_DN16865_c0_g2	7955.ENSDARP00000013110	92.4	8.1e-29	ENOG410YJ1Y	A	RNA processing and modification	Serine arginine-rich splicing factor 11
TRINITY_DN16866_c0_g2	3694.POPTR_0018s06840.1	78.3	3.3e-34	ENOG410XNU9	S	Function unknown	retinoblastoma binding protein
TRINITY_DN16868_c0_g1	3847.GLYMA20G20630.1	46.8	1.7e-36	ENOG410YTP7	S	Function unknown	NA
TRINITY_DN16869_c0_g4	3694.POPTR_0005s19030.1	62.4	6.7e-74	ENOG4112BMJ	U	Intracellular trafficking, secretion, and vesicular transport	Heat shock protein
TRINITY_DN16870_c0_g1	3694.POPTR_0018s05420.1	71.9	2.4e-56	ENOG410XQ5A	T	Signal transduction mechanisms	mitogen-activated protein kinase kinase
TRINITY_DN16872_c2_g1	7955.ENSDARP00000121673	57.1	1.5e-23	NA	NA	NA	NA
TRINITY_DN16873_c0_g2	4113.PGSC0003DMT400037844	64.8	1.1e-12	ENOG410Z7Z7	S	Function unknown	Pentatricopeptide repeat-containing protein
TRINITY_DN16874_c0_g1	29760.VIT_09s0002g07300.t01	45.6	1.1e-135	ENOG4110T18	S	Function unknown	Domain-Containing protein
TRINITY_DN16879_c0_g1	7955.ENSDARP00000120183	100	7.1e-67	COG2238	J	Translation, ribosomal structure and biogenesis	Ribosomal protein
TRINITY_DN1687_c0_g1	39946.BGIOSGA022884-PA	100	1.8e-45	COG0596	S	Function unknown	Alpha beta hydrolase
TRINITY_DN16880_c0_g1	3694.POPTR_0002s03950.1	38.7	4.3e-16	ENOG41118T9	S	Function unknown	NA
TRINITY_DN16884_c0_g1	3847.GLYMA20G23880.1	66.1	1.7e-221	ENOG410XQ54	S	Function unknown	F-box and leucine-rich repeat protein
TRINITY_DN16886_c0_g1	5297.EFP86750	52.7	5.7e-35	COG5052	U	Intracellular trafficking, secretion, and vesicular transport	receptor accessory protein
TRINITY_DN16887_c0_g1	29760.VIT_04s0008g05780.t01	73.8	1.4e-181	ENOG410XPM5	K	Transcription	TAF5-like RNA polymerase II, p300 CBP-associated factor (PCAF)-associated factor
TRINITY_DN16888_c0_g2	3694.POPTR_0014s07120.1	76.7	1.7e-199	COG0515	T	Signal transduction mechanisms	Serine Threonine protein kinase
TRINITY_DN1688_c0_g1	9606.ENSP00000346037	100	2.5e-34	COG2058	J	Translation, ribosomal structure and biogenesis	Ribosomal protein
TRINITY_DN16890_c0_g1	59689.fgenesh2_kg.4__264__AT2G23340.1	64.1	1.3e-35	ENOG41116MV	K	Transcription	transcription factor
TRINITY_DN16894_c0_g1	4113.PGSC0003DMT400069269	50	1e-36	ENOG411140T	S	Function unknown	CASP-like protein
TRINITY_DN16895_c0_g1	7955.ENSDARP00000117497	90.7	1.2e-80	ENOG41105PP	S	Function unknown	RNA binding motif protein
TRINITY_DN16898_c0_g2	3847.GLYMA12G36350.1	100	5.1e-36	ENOG410XPV4	U	Intracellular trafficking, secretion, and vesicular transport	nuclear pore complex protein
TRINITY_DN16900_c0_g2	3847.GLYMA06G42061.1	100	4.7e-14	COG0023	J	Translation, ribosomal structure and biogenesis	translation initiation factor
TRINITY_DN16903_c0_g1	4113.PGSC0003DMT400076709	63.4	1.4e-38	COG5126	D	Cell cycle control, cell division, chromosome partitioning	Calcium-binding protein
TRINITY_DN16903_c0_g1	4113.PGSC0003DMT400076709	63.4	1.4e-38	COG5126	T	Signal transduction mechanisms	Calcium-binding protein
TRINITY_DN16903_c0_g1	4113.PGSC0003DMT400076709	63.4	1.4e-38	COG5126	Z	Cytoskeleton	Calcium-binding protein
TRINITY_DN16909_c0_g2	29760.VIT_01s0137g00400.t01	53	3e-12	ENOG411157J	S	Function unknown	NA
TRINITY_DN16913_c1_g1	4113.PGSC0003DMT400088352	40.8	2e-24	ENOG410ZDKI	S	Function unknown	NA
TRINITY_DN16913_c1_g4	4113.PGSC0003DMT400088352	40.3	3.9e-20	ENOG410ZDKI	S	Function unknown	NA
TRINITY_DN16918_c1_g1	8128.ENSONIP00000011627	77.8	2.1e-24	ENOG410XRBS	Z	Cytoskeleton	vimentin
TRINITY_DN16918_c2_g2	31033.ENSTRUP00000030841	91.1	2.3e-29	ENOG410YY6B	S	Function unknown	structural constituent of epidermis
TRINITY_DN16918_c2_g7	9606.ENSP00000293308	100	4.6e-196	ENOG410YY6B	S	Function unknown	structural constituent of epidermis
TRINITY_DN16919_c0_g1	7955.ENSDARP00000053204	71.6	1.4e-72	ENOG4110S2M	U	Intracellular trafficking, secretion, and vesicular transport	CD74 molecule, major histocompatibility complex, class II invariant chain
TRINITY_DN16920_c0_g1	3847.GLYMA08G18820.1	69	1.1e-06	ENOG41115YH	S	Function unknown	VQ motif
TRINITY_DN16922_c0_g1	39947.LOC_Os02g33340.1	42	7.7e-13	ENOG410ZDF4	S	Function unknown	Integrase core domain
TRINITY_DN16922_c0_g4	39947.LOC_Os03g43610.1	40.2	7.2e-10	ENOG410XS4D	S	Function unknown	Retrotransposon protein
TRINITY_DN16922_c0_g5	39947.LOC_Os01g23090.1	63.1	1.7e-24	COG2801	L	Replication, recombination and repair	Retrotransposon protein
TRINITY_DN16923_c0_g1	9606.ENSP00000343027	100	1.1e-35	ENOG410XNVQ	S	Function unknown	Guanine nucleotide binding protein (G protein) alpha
TRINITY_DN16926_c0_g1	4113.PGSC0003DMT400069736	74.8	4.6e-84	ENOG4111TFW	P	Inorganic ion transport and metabolism	Stores iron in a soluble, non-toxic, readily available form. Important for iron homeostasis (By similarity)
TRINITY_DN16930_c0_g1	7955.ENSDARP00000105556	92.5	5.2e-34	COG5024	D	Cell cycle control, cell division, chromosome partitioning	g2 mitotic-specific
TRINITY_DN16931_c0_g1	4113.PGSC0003DMT400046612	67.7	1.2e-260	ENOG41111E0	S	Function unknown	NA
TRINITY_DN16932_c0_g1	29760.VIT_06s0080g00540.t01	65.3	1.1e-30	ENOG410Y847	S	Function unknown	NA
TRINITY_DN16933_c0_g1	3847.GLYMA20G29750.1	50.8	5.4e-23	ENOG4111FKI	O	Posttranslational modification, protein turnover, chaperones	Cytochrome
TRINITY_DN16937_c0_g1	3694.POPTR_2688s00200.1	43.8	3.3e-08	ENOG4111302	S	Function unknown	NA
TRINITY_DN16941_c0_g1	29760.VIT_08s0056g00780.t01	76.5	5.7e-41	COG0534	V	Defense mechanisms	Mate efflux family protein
TRINITY_DN16941_c0_g2	3694.POPTR_0013s06650.1	77.3	9.3e-154	COG0534	V	Defense mechanisms	Mate efflux family protein
TRINITY_DN16945_c0_g1	3694.POPTR_0004s18340.1	84	3.1e-30	COG0631	T	Signal transduction mechanisms	Phosphatase
TRINITY_DN16948_c0_g3	29760.VIT_14s0081g00460.t01	60.6	4.4e-94	COG5329	T	Signal transduction mechanisms	Phosphatase
TRINITY_DN16950_c0_g2	3847.GLYMA16G29330.1	96.2	7.6e-35	COG1819	S	Function unknown	Transferase
TRINITY_DN16953_c0_g1	3847.GLYMA01G38910.1	50.8	1.1e-39	ENOG410YRE3	S	Function unknown	NA
TRINITY_DN16957_c0_g1	9606.ENSP00000253003	100	2.5e-19	ENOG410XSJJ	O	Posttranslational modification, protein turnover, chaperones	Adhesion regulating molecule
TRINITY_DN16957_c0_g2	30608.ENSMICP00000011626	89.2	3.5e-103	ENOG41122P5	S	Function unknown	actin-depolymerizing factor
TRINITY_DN16959_c3_g1	4081.Solyc09g090100.2.1	74.4	3.8e-66	COG0415	L	Replication, recombination and repair	deoxyribo-dipyrimidine photolyase
TRINITY_DN16960_c0_g2	4081.Solyc10g079350.1.1	68.8	5.2e-15	COG1819	S	Function unknown	Transferase
TRINITY_DN16961_c0_g1	4081.Solyc11g022380.1.1	68.7	2.3e-48	COG5329	T	Signal transduction mechanisms	Phosphatase
TRINITY_DN16963_c0_g1	4081.Solyc07g042450.2.1	52.5	2.1e-19	ENOG410ZTG3	S	Function unknown	NA
TRINITY_DN16968_c0_g5	7955.ENSDARP00000067933	98.7	7.8e-37	COG5069	Z	Cytoskeleton	Microtubule associated monoxygenase, calponin and LIM domain containing
TRINITY_DN16968_c0_g8	7955.ENSDARP00000067933	98	7.7e-53	COG5069	Z	Cytoskeleton	Microtubule associated monoxygenase, calponin and LIM domain containing
TRINITY_DN16971_c0_g1	3694.POPTR_0014s10590.1	61.5	1.4e-27	ENOG410Z2U1	S	Function unknown	NA
TRINITY_DN16973_c0_g4	240176.XP_001836378.1	44.9	1.1e-10	ENOG410YN0X	S	Function unknown	NA
TRINITY_DN16974_c0_g1	4081.Solyc08g079050.1.1	61.2	3.1e-32	ENOG410YNE7	S	Function unknown	NA
TRINITY_DN16974_c0_g3	4081.Solyc08g079050.1.1	55.6	4.8e-12	ENOG410YNE7	S	Function unknown	NA
TRINITY_DN16975_c0_g2	3694.POPTR_0018s11010.1	75	3.4e-36	ENOG4111RF3	S	Function unknown	Transmembrane protein 208
TRINITY_DN16976_c0_g2	15368.BRADI2G56060.2	97.9	5.6e-44	ENOG4111PB8	K	Transcription	LSM3 homolog, U6 small nuclear RNA associated (S. cerevisiae)
TRINITY_DN16978_c3_g4	3847.GLYMA10G40340.1	100	2.3e-38	ENOG41105IF	U	Intracellular trafficking, secretion, and vesicular transport	calcium ion binding
TRINITY_DN16979_c0_g1	3694.POPTR_0008s20330.1	76.2	3.8e-50	ENOG410XRN0	E	Amino acid transport and metabolism	S-adenosylmethionine decarboxylase proenzyme
TRINITY_DN16981_c0_g2	29760.VIT_05s0102g01210.t01	74.7	1.9e-149	COG1463	Q	Secondary metabolites biosynthesis, transport and catabolism	Mammalian cell entry related domain protein
TRINITY_DN16983_c0_g1	4081.Solyc01g094020.2.1	70.1	6.6e-190	COG0515	T	Signal transduction mechanisms	Serine Threonine protein kinase
TRINITY_DN16985_c0_g1	29760.VIT_19s0014g03470.t01	55.6	1.2e-34	ENOG4111Z8B	S	Function unknown	NA
TRINITY_DN16986_c0_g1	29760.VIT_14s0030g00410.t01	51.3	4.2e-38	COG2198	T	Signal transduction mechanisms	Histidine kinase
TRINITY_DN16987_c0_g1	4113.PGSC0003DMT400083136	51.5	3.8e-103	ENOG41127Z6	S	Function unknown	NA
TRINITY_DN16989_c0_g2	4081.Solyc07g040690.2.1	70.3	3.4e-221	COG0666	S	Function unknown	Ankyrin Repeat
TRINITY_DN16990_c0_g1	29760.VIT_11s0016g01740.t01	59	1.1e-92	ENOG411081U	S	Function unknown	Ly1 antibody reactive homolog (mouse)
TRINITY_DN16991_c1_g1	4081.Solyc02g078030.1.1	68.2	1.4e-64	ENOG410YVV0	S	Function unknown	VQ motif-containing protein
TRINITY_DN16992_c0_g1	29760.VIT_05s0029g01300.t01	71.2	7.1e-93	ENOG4111S70	S	Function unknown	Melanoma antigen, family
TRINITY_DN16995_c0_g1	4081.Solyc11g005260.1.1	56.1	7.3e-86	ENOG4111JHV	S	Function unknown	SRR1 domain containing
TRINITY_DN16998_c0_g2	3694.POPTR_0014s17940.1	65.9	8.2e-75	ENOG410YICA	U	Intracellular trafficking, secretion, and vesicular transport	High-conductance voltage-dependent solute channel with a slight selectivity for cations transporting triosephosphates, dicarboxylic acids, ATP, inorganic phosphate (Pi), sugars, and positively or negatively charged amino acids (By similarity)
TRINITY_DN16999_c0_g8	30608.ENSMICP00000008307	100	1.1e-32	COG3588	G	Carbohydrate transport and metabolism	fructose-bisphosphate aldolase
TRINITY_DN17000_c0_g1	29760.VIT_18s0001g08150.t01	69.5	2.6e-156	ENOG410XP79	S	Function unknown	glucuronosyltransferase
TRINITY_DN17004_c0_g4	3847.GLYMA11G11050.1	52.6	1.3e-30	ENOG410XV78	O	Posttranslational modification, protein turnover, chaperones	RING finger protein 4
TRINITY_DN17007_c0_g2	29760.VIT_13s0067g03850.t01	51.9	7.2e-150	ENOG410Y9BV	S	Function unknown	expressed protein
TRINITY_DN17009_c0_g1	29760.VIT_05s0094g00780.t01	83.9	2.1e-166	COG0031	E	Amino acid transport and metabolism	cysteine biosynthetic process from serine
TRINITY_DN17010_c0_g1	9606.ENSP00000225430	100	3.1e-83	COG2147	J	Translation, ribosomal structure and biogenesis	ribosomal protein L19
TRINITY_DN17010_c0_g2	31033.ENSTRUP00000042111	96.3	4.5e-82	COG2147	J	Translation, ribosomal structure and biogenesis	ribosomal protein L19
TRINITY_DN17010_c0_g3	9483.ENSCJAP00000041508	94.9	5.6e-50	COG2147	J	Translation, ribosomal structure and biogenesis	ribosomal protein L19
TRINITY_DN17012_c0_g1	39946.BGIOSGA023081-PA	98.6	2.9e-54	COG2004	J	Translation, ribosomal structure and biogenesis	40S ribosomal protein S24
TRINITY_DN17014_c0_g1	3694.POPTR_0010s23120.1	85.4	2.1e-16	COG0524	G	Carbohydrate transport and metabolism	pfkb domain protein
TRINITY_DN17016_c1_g1	7955.ENSDARP00000088880	85.7	1.9e-38	ENOG410XRBS	Z	Cytoskeleton	vimentin
TRINITY_DN17016_c1_g2	7955.ENSDARP00000088880	90.9	2.3e-28	ENOG410XRBS	Z	Cytoskeleton	vimentin
TRINITY_DN17016_c1_g3	9606.ENSP00000224237	100	4.4e-136	ENOG410XRBS	Z	Cytoskeleton	vimentin
TRINITY_DN17023_c0_g1	7955.ENSDARP00000069977	100	2.5e-58	COG0093	J	Translation, ribosomal structure and biogenesis	Binds to 23S rRNA. Forms part of two intersubunit bridges in the 70S ribosome (By similarity)
TRINITY_DN17026_c1_g1	7955.ENSDARP00000008085	86	2e-14	ENOG410XQRX	S	Function unknown	Testis-specific Y-encoded-like protein
TRINITY_DN17026_c1_g2	7955.ENSDARP00000111487	99.2	8.9e-65	ENOG4111UVJ	J	Translation, ribosomal structure and biogenesis	Ribosomal protein
TRINITY_DN17026_c1_g6	39946.BGIOSGA026376-PA	100	7.1e-65	ENOG4111UVJ	J	Translation, ribosomal structure and biogenesis	Ribosomal protein
TRINITY_DN17028_c0_g1	39947.LOC_Os08g22660.1	60.9	3.7e-25	COG2801	L	Replication, recombination and repair	Retrotransposon protein
TRINITY_DN17028_c0_g5	39947.LOC_Os04g04490.1	66.7	1.1e-30	COG2801	L	Replication, recombination and repair	Retrotransposon protein
TRINITY_DN17028_c0_g9	4081.Solyc11g017260.1.1	66.3	3.7e-28	COG2801	L	Replication, recombination and repair	Retrotransposon protein
TRINITY_DN17033_c0_g1	7955.ENSDARP00000125232	65.9	2.4e-23	NA	NA	NA	NA
TRINITY_DN17034_c0_g1	3694.POPTR_0010s14120.1	79.1	5.7e-155	ENOG410XPT7	S	Function unknown	taurine catabolism dioxygenase taud tfda
TRINITY_DN17035_c0_g3	3694.POPTR_0010s20530.1	66.2	7.8e-19	COG0285	H	Coenzyme transport and metabolism	Folylpolyglutamate synthase
TRINITY_DN17036_c0_g1	7955.ENSDARP00000099688	100	8.5e-135	COG4870	O	Posttranslational modification, protein turnover, chaperones	cathepsin
TRINITY_DN17039_c0_g2	4081.Solyc03g120670.2.1	69	3e-122	COG1052	C	Energy production and conversion	Dehydrogenase
TRINITY_DN17040_c0_g1	3694.POPTR_0003s03310.1	74.2	2.3e-71	COG0515	T	Signal transduction mechanisms	Serine Threonine protein kinase
TRINITY_DN17042_c0_g3	29760.VIT_14s0066g00060.t01	53.8	2.1e-13	ENOG4111ADI	S	Function unknown	Mediator complex subunit 28
TRINITY_DN17044_c0_g2	29760.VIT_14s0060g01720.t01	61.8	6.5e-33	ENOG410YZ0W	S	Function unknown	Dormancy auxin associated
TRINITY_DN17045_c0_g1	29760.VIT_05s0062g00880.t01	62.1	3.8e-52	COG0100	J	Translation, ribosomal structure and biogenesis	Located on the platform of the 30S subunit, it bridges several disparate RNA helices of the 16S rRNA. Forms part of the Shine-Dalgarno cleft in the 70S ribosome (By similarity)
TRINITY_DN17046_c0_g2	7955.ENSDARP00000004557	100	1.5e-37	ENOG4110EVD	K	Transcription	interferon regulatory factor 2 binding protein 2
TRINITY_DN17048_c0_g2	3694.POPTR_0002s22030.1	67.2	1.6e-87	ENOG4111K44	O	Posttranslational modification, protein turnover, chaperones	Rho GDP dissociation inhibitor (GDI)
TRINITY_DN17054_c0_g2	29760.VIT_18s0001g06590.t01	63.3	9.4e-65	COG0724	S	Function unknown	Rna-binding protein
TRINITY_DN17055_c0_g3	3847.GLYMA02G10450.1	100	1.8e-32	ENOG410XPUI	S	Function unknown	member RAS oncogene family
TRINITY_DN17056_c0_g1	4081.Solyc11g012480.1.1	65	6e-93	COG1435	F	Nucleotide transport and metabolism	THymidine Kinase
TRINITY_DN17058_c0_g1	7955.ENSDARP00000112534	89.2	1.8e-189	ENOG41116IH	U	Intracellular trafficking, secretion, and vesicular transport	sphingosine-1-phosphate receptor 4
TRINITY_DN1705_c0_g1	7955.ENSDARP00000101541	75.9	2.1e-30	COG1018	C	Energy production and conversion	Is involved in NO detoxification in an aerobic process, termed nitric oxide dioxygenase (NOD) reaction that utilizes O(2) and NAD(P)H to convert NO to nitrate, which protects the bacterium from various noxious nitrogen compounds. Therefore, plays a central role in the inducible response to nitrosative stress (By similarity)
TRINITY_DN17060_c0_g1	29760.VIT_01s0011g06350.t01	46.8	7.6e-19	ENOG410ZFVT	S	Function unknown	NA
TRINITY_DN17062_c0_g1	4113.PGSC0003DMT400025793	61.4	1.8e-98	ENOG410YS61	S	Function unknown	F-box protein
TRINITY_DN17062_c0_g2	4113.PGSC0003DMT400025793	57.7	2.8e-35	ENOG410YS61	S	Function unknown	F-box protein
TRINITY_DN17065_c0_g1	3847.GLYMA05G28880.1	98.5	1.2e-67	COG1717	J	Translation, ribosomal structure and biogenesis	(ribosomal) protein
TRINITY_DN17068_c0_g1	29760.VIT_06s0009g03170.t01	66.1	2.2e-105	COG0607	P	Inorganic ion transport and metabolism	Rhodanese domain protein
TRINITY_DN17068_c0_g1	29760.VIT_06s0009g03170.t01	66.1	2.2e-105	COG0760	O	Posttranslational modification, protein turnover, chaperones	peptidyl-prolyl cis-trans isomerase
TRINITY_DN17071_c0_g4	29760.VIT_12s0057g00700.t01	76.5	2.5e-08	ENOG410YNUZ	G	Carbohydrate transport and metabolism	glucan endo-1,3-beta-glucosidase
TRINITY_DN17072_c0_g1	29760.VIT_05s0124g00040.t01	83.1	1.6e-88	ENOG410XSM0	U	Intracellular trafficking, secretion, and vesicular transport	Clathrin interactor 1
TRINITY_DN17073_c0_g1	4081.Solyc04g081430.2.1	89.3	1.2e-80	ENOG410ZFRU	K	Transcription	Component of the Mediator complex, a coactivator involved in the regulated transcription of nearly all RNA polymerase II-dependent genes. Mediator functions as a bridge to convey information from gene-specific regulatory proteins to the basal RNA polymerase II transcription machinery. Mediator is recruited to promoters by direct interactions with regulatory proteins and serves as a scaffold for t…
TRINITY_DN17074_c0_g1	29760.VIT_17s0000g08000.t01	69.3	5.7e-50	ENOG410YN9Y	S	Function unknown	RIBOc
TRINITY_DN17078_c0_g2	3847.GLYMA02G03280.1	100	2e-60	NA	NA	NA	NA
TRINITY_DN17079_c0_g1	4113.PGSC0003DMT400056441	77.1	5.7e-26	COG2053	J	Translation, ribosomal structure and biogenesis	Ribosomal protein
TRINITY_DN17080_c0_g1	4081.Solyc03g110880.2.1	65	0	COG0085	K	Transcription	DNA-dependent RNA polymerase catalyzes the transcription of DNA into RNA using the four ribonucleoside triphosphates as substrates (By similarity)
TRINITY_DN17080_c0_g2	4081.Solyc03g110880.2.1	81.1	1.6e-116	COG0085	K	Transcription	DNA-dependent RNA polymerase catalyzes the transcription of DNA into RNA using the four ribonucleoside triphosphates as substrates (By similarity)
TRINITY_DN17084_c0_g1	29760.VIT_11s0016g04610.t01	76	2.2e-39	ENOG410YFP8	S	Function unknown	RNA recognition motif. (a.k.a. RRM, RBD, or RNP domain)
TRINITY_DN17086_c1_g2	39946.BGIOSGA017911-PA	100	1.5e-68	ENOG410XPUI	S	Function unknown	member RAS oncogene family
TRINITY_DN17086_c1_g3	3847.GLYMA20G23210.5	100	2.5e-26	ENOG410XPUI	S	Function unknown	member RAS oncogene family
TRINITY_DN17091_c0_g1	31234.CRE28495	84.8	3.9e-25	ENOG41121HS	Z	Cytoskeleton	Calponin family repeat
TRINITY_DN17092_c0_g1	7955.ENSDARP00000067901	98.6	4.3e-37	ENOG410XNSK	S	Function unknown	oligomeric mucus gel-forming
TRINITY_DN17095_c0_g1	29760.VIT_08s0007g04690.t01	78.7	7.3e-213	ENOG410XR1C	S	Function unknown	WD repeat domain 3
TRINITY_DN17095_c0_g2	3694.POPTR_0006s12290.1	80	2.4e-45	ENOG410XR1C	S	Function unknown	WD repeat domain 3
TRINITY_DN17096_c0_g1	29760.VIT_18s0001g15560.t01	70.1	6.5e-73	ENOG410YERQ	S	Function unknown	Uncharacterised BCR, YhbC family COG0779
TRINITY_DN1709_c0_g1	39946.BGIOSGA015358-PA	100	3.1e-31	ENOG41124JV	I	Lipid transport and metabolism	Accessory subunit of the mitochondrial membrane respiratory chain NADH dehydrogenase (Complex I), that is believed not to be involved in catalysis. Complex I functions in the transfer of electrons from NADH to the respiratory chain. The immediate electron acceptor for the enzyme is believed to be ubiquinone
TRINITY_DN17102_c0_g2	29760.VIT_06s0004g07560.t01	84	1.3e-42	ENOG410XSDC	S	Function unknown	Death associated protein 3
TRINITY_DN17102_c0_g3	4113.PGSC0003DMT400078112	66.8	3.8e-73	ENOG410XSDC	S	Function unknown	Death associated protein 3
TRINITY_DN17103_c0_g1	29760.VIT_06s0004g05220.t01	85.9	4e-70	ENOG4111IMU	S	Function unknown	serine arginine repetitive matrix
TRINITY_DN17107_c0_g1	4081.Solyc01g104080.2.1	81.5	9.5e-141	ENOG4111PIG	S	Function unknown	NA
TRINITY_DN17108_c0_g1	69293.ENSGACP00000008246	68.4	4.3e-15	ENOG410ZQIE	O	Posttranslational modification, protein turnover, chaperones	apoptosis-related cysteine peptidase
TRINITY_DN17110_c0_g1	29760.VIT_17s0000g00910.t01	60.7	5.3e-246	ENOG411033B	S	Function unknown	MORC family CW-type zinc finger
TRINITY_DN17113_c0_g1	29760.VIT_07s0005g03910.t01	82.3	5.6e-54	ENOG410Y9CF	S	Function unknown	Acyl-transferase
TRINITY_DN17114_c1_g1	88036.EFJ31978	90.7	1.5e-16	COG2051	J	Translation, ribosomal structure and biogenesis	40s ribosomal protein S27
TRINITY_DN17117_c0_g1	4577.GRMZM2G312712_P02	58	8.9e-27	ENOG410XXHF	S	Function unknown	ring finger and CHY zinc finger
TRINITY_DN17118_c0_g1	3694.POPTR_0004s06280.1	66.3	1.4e-25	ENOG410XRQR	S	Function unknown	MAC Perforin domain containing protein
TRINITY_DN17118_c0_g2	4113.PGSC0003DMT400073150	82.5	1.7e-66	ENOG410XRQR	S	Function unknown	MAC Perforin domain containing protein
TRINITY_DN17119_c0_g1	3847.GLYMA11G03690.1	99.6	1.4e-132	COG0580	G	Carbohydrate transport and metabolism	Channel that permits osmotically driven movement of water in both directions. It is involved in the osmoregulation and in the maintenance of cell turgor during volume expansion in rapidly growing cells. It mediates rapid entry or exit of water in response to abrupt changes in osmolarity (By similarity)
TRINITY_DN17120_c0_g1	3847.GLYMA13G28720.1	90.3	5.1e-70	COG0553	L	Replication, recombination and repair	helicase
TRINITY_DN17121_c0_g1	3694.POPTR_0014s15920.1	50.9	5.2e-84	ENOG410YHE5	S	Function unknown	IQ
TRINITY_DN17124_c0_g2	3847.GLYMA15G42620.1	94.5	2e-39	COG2163	J	Translation, ribosomal structure and biogenesis	(ribosomal) protein
TRINITY_DN17124_c0_g3	3847.GLYMA08G15000.1	93	1.1e-46	COG2163	J	Translation, ribosomal structure and biogenesis	(ribosomal) protein
TRINITY_DN17127_c0_g1	4113.PGSC0003DMT400054483	64.5	3e-64	ENOG4111JC3	S	Function unknown	NA
TRINITY_DN17129_c0_g1	29760.VIT_05s0020g02050.t01	49.1	6.1e-65	ENOG410YFRT	O	Posttranslational modification, protein turnover, chaperones	DNAJ heat shock N-terminal domain-containing protein
TRINITY_DN17130_c0_g2	3847.GLYMA08G03630.1	75.3	1.5e-100	COG5291	S	Function unknown	Derlin 1
TRINITY_DN17132_c0_g1	4113.PGSC0003DMT400045469	59.4	4.5e-54	ENOG410Z2UE	K	Transcription	homeobox-leucine zipper protein
TRINITY_DN17134_c0_g1	3694.POPTR_0004s06120.1	86.8	1.1e-77	COG0198	J	Translation, ribosomal structure and biogenesis	One of the proteins that surrounds the polypeptide exit tunnel on the outside of the subunit (By similarity)
TRINITY_DN17135_c0_g1	29760.VIT_05s0020g03640.t01	58.6	6.1e-21	ENOG410YIDJ	S	Function unknown	ERG2 and Sigma1 receptor like protein
TRINITY_DN17135_c1_g9	3694.POPTR_0002s24930.1	69.5	5.3e-190	ENOG410Y94B	G	Carbohydrate transport and metabolism	glucan endo-1-3-beta-glucosidase
TRINITY_DN17136_c0_g1	29760.VIT_19s0014g00180.t01	80.5	1.9e-137	COG0524	G	Carbohydrate transport and metabolism	pfkb domain protein
TRINITY_DN17137_c0_g1	3694.POPTR_0002s15380.1	84.4	4.7e-14	NA	NA	NA	NA
TRINITY_DN17139_c0_g1	29760.VIT_13s0067g03660.t01	48.1	2.1e-91	ENOG410YZEJ	S	Function unknown	NA
TRINITY_DN17140_c0_g1	29760.VIT_00s0215g00110.t01	72	1.9e-18	COG1597	I	Lipid transport and metabolism	diacylglycerol kinase
TRINITY_DN17141_c0_g1	3694.POPTR_0009s00980.1	76.3	2.4e-15	ENOG410Z7C9	S	Function unknown	NA
TRINITY_DN17144_c1_g1	4081.Solyc06g060610.2.1	64.1	8.3e-16	COG2072	P	Inorganic ion transport and metabolism	Monooxygenase
TRINITY_DN17145_c1_g3	29760.VIT_13s0019g02230.t01	59.2	2.7e-130	COG5260	L	Replication, recombination and repair	domain) containing
TRINITY_DN17146_c0_g1	4081.Solyc12g042920.1.1	95	2.1e-75	COG2857	C	Energy production and conversion	cytochrome c1
TRINITY_DN17146_c0_g5	29760.VIT_14s0171g00330.t01	80.7	2.7e-28	COG2857	C	Energy production and conversion	cytochrome c1
TRINITY_DN17147_c0_g3	7955.ENSDARP00000040537	94.3	2.3e-20	COG0235	G	Carbohydrate transport and metabolism	Class II aldolase adducin
TRINITY_DN17148_c0_g1	3847.GLYMA13G22420.1	93.9	3.5e-08	COG1241	L	Replication, recombination and repair	dna replication licensing factor
TRINITY_DN17148_c0_g2	4081.Solyc07g005020.2.1	83.7	0	COG1241	L	Replication, recombination and repair	dna replication licensing factor
TRINITY_DN17149_c0_g7	4081.Solyc06g008900.2.1	36.4	1.9e-35	NA	NA	NA	NA
TRINITY_DN17150_c0_g2	10116.ENSRNOP00000000696	100	1.4e-70	ENOG410XSI5	O	Posttranslational modification, protein turnover, chaperones	surfactant protein B
TRINITY_DN17151_c0_g1	29760.VIT_00s0551g00020.t01	93.3	1e-59	COG1632	J	Translation, ribosomal structure and biogenesis	Ribosomal protein L15
TRINITY_DN17151_c0_g10	9606.ENSP00000309334	100	1.8e-74	COG1632	J	Translation, ribosomal structure and biogenesis	Ribosomal protein L15
TRINITY_DN17151_c0_g2	7955.ENSDARP00000122141	98.2	9.4e-91	COG1632	J	Translation, ribosomal structure and biogenesis	Ribosomal protein L15
TRINITY_DN17151_c0_g3	13616.ENSMODP00000018609	96.9	1.1e-67	COG1632	J	Translation, ribosomal structure and biogenesis	Ribosomal protein L15
TRINITY_DN17151_c0_g4	3847.GLYMA01G41620.1	100	1e-36	COG1632	J	Translation, ribosomal structure and biogenesis	Ribosomal protein L15
TRINITY_DN17151_c0_g5	39946.BGIOSGA010295-PA	95.7	1.3e-85	COG1632	J	Translation, ribosomal structure and biogenesis	Ribosomal protein L15
TRINITY_DN17151_c0_g6	3847.GLYMA01G41620.1	100	5.7e-52	COG1632	J	Translation, ribosomal structure and biogenesis	Ribosomal protein L15
TRINITY_DN17151_c0_g7	3694.POPTR_0002s14250.1	60.9	5.7e-65	COG1632	J	Translation, ribosomal structure and biogenesis	Ribosomal protein L15
TRINITY_DN17151_c0_g8	3847.GLYMA05G04870.1	100	4.1e-114	COG1632	J	Translation, ribosomal structure and biogenesis	Ribosomal protein L15
TRINITY_DN17151_c0_g9	7955.ENSDARP00000122141	100	5e-86	COG1632	J	Translation, ribosomal structure and biogenesis	Ribosomal protein L15
TRINITY_DN17153_c1_g1	4555.Si012749m	40.8	1.5e-07	NA	NA	NA	NA
TRINITY_DN17154_c0_g1	7955.ENSDARP00000090576	100	2.4e-32	ENOG410YKF6	S	Function unknown	protein 2 3 complex subunit
TRINITY_DN17154_c0_g2	7955.ENSDARP00000090576	100	1.2e-33	ENOG410YKF6	S	Function unknown	protein 2 3 complex subunit
TRINITY_DN17155_c0_g1	4113.PGSC0003DMT400082796	75	2.2e-98	COG0631	T	Signal transduction mechanisms	Phosphatase
TRINITY_DN17158_c0_g1	29760.VIT_03s0063g01020.t01	67.2	1.3e-168	ENOG410XR4D	S	Function unknown	armadillo repeat containing 6
TRINITY_DN17161_c0_g6	4113.PGSC0003DMT400094362	65	2.4e-33	ENOG410Z7Z7	S	Function unknown	Pentatricopeptide repeat-containing protein
TRINITY_DN17162_c0_g1	29760.VIT_19s0014g00850.t01	68.1	4.4e-184	ENOG410YAB2	S	Function unknown	NA
TRINITY_DN17163_c0_g2	3694.POPTR_0006s18280.1	80.8	5.1e-225	COG0369	P	Inorganic ion transport and metabolism	Component of the sulfite reductase complex that catalyzes the 6-electron reduction of sulfite to sulfide. This is one of several activities required for the biosynthesis of L- cysteine from sulfate. The flavoprotein component catalyzes the electron flow from NADPH - FAD - FMN to the hemoprotein component (By similarity)
TRINITY_DN17163_c0_g4	29760.VIT_11s0052g00880.t01	84.6	4.9e-61	COG0369	P	Inorganic ion transport and metabolism	Component of the sulfite reductase complex that catalyzes the 6-electron reduction of sulfite to sulfide. This is one of several activities required for the biosynthesis of L- cysteine from sulfate. The flavoprotein component catalyzes the electron flow from NADPH - FAD - FMN to the hemoprotein component (By similarity)
TRINITY_DN17164_c2_g3	3847.GLYMA09G02430.1	74.4	9.3e-114	COG0666	S	Function unknown	Ankyrin Repeat
TRINITY_DN17164_c2_g5	29760.VIT_10s0042g01250.t01	69	6.6e-110	COG0666	S	Function unknown	Ankyrin Repeat
TRINITY_DN17165_c1_g3	29760.VIT_02s0025g01160.t01	90.5	4e-132	ENOG410XQJF	A	RNA processing and modification	crooked neck pre-mRNA splicing factor-like 1 (Drosophila)
TRINITY_DN17168_c0_g2	3847.GLYMA12G08050.1	100	1.8e-30	COG0080	J	Translation, ribosomal structure and biogenesis	This protein binds directly to 23S ribosomal RNA (By similarity)
TRINITY_DN17168_c0_g3	39946.BGIOSGA008871-PA	100	1.2e-85	COG0080	J	Translation, ribosomal structure and biogenesis	This protein binds directly to 23S ribosomal RNA (By similarity)
TRINITY_DN17170_c0_g1	4113.PGSC0003DMT400026090	72.2	3.2e-131	ENOG41118P7	G	Carbohydrate transport and metabolism	peroxidase
TRINITY_DN17171_c0_g1	29760.VIT_04s0008g02840.t01	66	3.4e-56	ENOG410XV5J	S	Function unknown	disease resistance protein Aig2
TRINITY_DN17173_c0_g1	39947.LOC_Os07g11380.1	100	1e-102	ENOG41103SW	S	Function unknown	type I hypersensitivity
TRINITY_DN17173_c0_g3	39946.BGIOSGA024611-PA	100	4.2e-90	ENOG41103SW	S	Function unknown	type I hypersensitivity
TRINITY_DN17174_c0_g1	4513.MLOC_23785.3	54.8	1.6e-21	ENOG4111T8J	S	Function unknown	transposon protein
TRINITY_DN17175_c0_g1	29760.VIT_18s0001g13950.t01	58.7	2.5e-67	ENOG4111X1Q	S	Function unknown	rna polymerase
TRINITY_DN17176_c0_g1	59689.Al_scaffold_0007_2229	42.2	2.3e-32	ENOG410Y3ZI	S	Function unknown	NA
TRINITY_DN17178_c0_g1	29760.VIT_01s0026g00960.t01	31.6	1.6e-38	ENOG4111BIK	S	Function unknown	NA
TRINITY_DN17184_c0_g1	7955.ENSDARP00000065198	84.8	7.2e-90	COG5063	S	Function unknown	zinc finger
TRINITY_DN17184_c0_g3	7955.ENSDARP00000065198	58.5	2.1e-23	COG5063	S	Function unknown	zinc finger
TRINITY_DN17185_c0_g2	7955.ENSDARP00000003107	100	1.2e-63	COG0459	O	Posttranslational modification, protein turnover, chaperones	Prevents misfolding and promotes the refolding and proper assembly of unfolded polypeptides generated under stress conditions (By similarity)
TRINITY_DN17186_c0_g1	4081.Solyc00g323130.2.1	53	2.2e-42	ENOG4111C37	S	Function unknown	response to biotic stimulus
TRINITY_DN17188_c0_g1	3694.POPTR_0018s09500.1	82.5	7.4e-84	COG2084	I	Lipid transport and metabolism	Dehydrogenase
TRINITY_DN17190_c0_g1	7955.ENSDARP00000024189	99.3	6.4e-67	ENOG4111T32	J	Translation, ribosomal structure and biogenesis	protein complex subunit organization
TRINITY_DN17191_c0_g1	4081.Solyc09g013100.2.1	73.3	2.1e-217	ENOG4111F7B	S	Function unknown	NA
TRINITY_DN17193_c0_g1	4113.PGSC0003DMT400076407	75.3	3.9e-148	COG4886	S	Function unknown	leucine Rich Repeat
TRINITY_DN17194_c0_g1	29760.VIT_11s0016g01160.t01	75.8	3.2e-71	ENOG4111YE4	S	Function unknown	FR47-like protein
TRINITY_DN17195_c0_g1	3694.POPTR_0002s07380.1	54.2	9.9e-26	ENOG410XT7C	K	Transcription	NA
TRINITY_DN17196_c0_g1	3694.POPTR_0001s10560.1	72.1	2.5e-99	ENOG410XPC9	G	Carbohydrate transport and metabolism	hydrolase family
TRINITY_DN17197_c0_g1	29760.VIT_01s0026g02550.t01	63	5e-84	ENOG4111ACN	K	Transcription	Myb-like DNA-binding domain
TRINITY_DN17200_c0_g2	29760.VIT_16s0039g01440.t01	58.5	3.8e-06	ENOG410XT1W	L	Replication, recombination and repair	origin recognition complex subunit
TRINITY_DN17202_c1_g2	7955.ENSDARP00000042199	100	4.2e-35	COG3588	G	Carbohydrate transport and metabolism	fructose-bisphosphate aldolase
TRINITY_DN17204_c2_g1	29760.VIT_07s0031g01750.t01	62.5	2.1e-14	COG1444	S	Function unknown	Catalyzes the formation of N(4)-acetylcytidine (ac(4)C) at the wobble position of tRNA(Met), by using acetyl-CoA as an acetyl donor and ATP (or GTP) (By similarity)
TRINITY_DN17205_c0_g1	4113.PGSC0003DMT400053148	70.1	3.6e-63	ENOG410ZKR3	S	Function unknown	wound stress protein
TRINITY_DN17206_c0_g1	3694.POPTR_0004s05210.1	42.7	2e-103	ENOG410ZVKW	P	Inorganic ion transport and metabolism	Calcium-binding EF hand family protein
TRINITY_DN17207_c0_g1	8128.ENSONIP00000018563	98.9	3.3e-48	COG5045	J	Translation, ribosomal structure and biogenesis	Ribosomal protein
TRINITY_DN17207_c0_g2	7955.ENSDARP00000045900	100	9.5e-75	COG5045	J	Translation, ribosomal structure and biogenesis	Ribosomal protein
TRINITY_DN17208_c0_g1	7955.ENSDARP00000095139	100	6.7e-75	COG0185	J	Translation, ribosomal structure and biogenesis	Protein S19 forms a complex with S13 that binds strongly to the 16S ribosomal RNA (By similarity)
TRINITY_DN17214_c0_g1	4113.PGSC0003DMT400015679	83.5	1.3e-52	ENOG41125SJ	S	Function unknown	UPF0451 protein C17orf61 homolog
TRINITY_DN17216_c0_g1	4081.Solyc12g021230.1.1	82.8	2.3e-138	COG0187	L	Replication, recombination and repair	DNA gyrase negatively supercoils closed circular double- stranded DNA in an ATP-dependent manner and also catalyzes the interconversion of other topological isomers of double-stranded DNA rings, including catenanes and knotted rings (By similarity)
TRINITY_DN17216_c0_g3	29760.VIT_08s0007g05120.t01	80.9	1.8e-173	COG0187	L	Replication, recombination and repair	DNA gyrase negatively supercoils closed circular double- stranded DNA in an ATP-dependent manner and also catalyzes the interconversion of other topological isomers of double-stranded DNA rings, including catenanes and knotted rings (By similarity)
TRINITY_DN17218_c0_g11	3847.GLYMA16G29430.1	67.9	3.3e-08	COG1819	S	Function unknown	Transferase
TRINITY_DN17218_c0_g7	3847.GLYMA16G29430.1	73.6	1.2e-28	COG1819	S	Function unknown	Transferase
TRINITY_DN17219_c0_g1	7955.ENSDARP00000067865	100	4.8e-66	COG1383	J	Translation, ribosomal structure and biogenesis	Ribosomal protein
TRINITY_DN17219_c0_g2	7955.ENSDARP00000106566	96.8	6.3e-63	COG1383	J	Translation, ribosomal structure and biogenesis	Ribosomal protein
TRINITY_DN17219_c0_g3	9606.ENSP00000346045	100	2.3e-69	COG1383	J	Translation, ribosomal structure and biogenesis	Ribosomal protein
TRINITY_DN17220_c1_g1	29760.VIT_10s0003g04210.t01	81.4	7e-30	ENOG410Y942	S	Function unknown	phospholipase A1-Igamma1, chloroplastic-like
TRINITY_DN17220_c1_g2	29760.VIT_10s0003g04210.t01	79.6	5.7e-71	ENOG410Y942	S	Function unknown	phospholipase A1-Igamma1, chloroplastic-like
TRINITY_DN17220_c1_g3	29760.VIT_10s0003g04230.t01	44.1	8.4e-20	ENOG410Y942	S	Function unknown	phospholipase A1-Igamma1, chloroplastic-like
TRINITY_DN17221_c0_g2	29760.VIT_19s0014g01900.t01	82.7	0	COG5028	U	Intracellular trafficking, secretion, and vesicular transport	SEC24 family, member
TRINITY_DN17225_c0_g2	3694.POPTR_0019s08560.1	69.1	6.6e-14	ENOG410XPKH	U	Intracellular trafficking, secretion, and vesicular transport	Reticulon
TRINITY_DN17226_c0_g2	29760.VIT_03s0180g00050.t01	83.5	2.2e-149	COG0202	K	Transcription	DNA-dependent RNA polymerase catalyzes the transcription of DNA into RNA using the four ribonucleoside triphosphates as substrates (By similarity)
TRINITY_DN17226_c0_g3	29760.VIT_17s0053g00090.t01	62.3	4.3e-265	ENOG410YAIP	S	Function unknown	plastid division protein CDP1, chloroplastic-like
TRINITY_DN17227_c0_g2	7955.ENSDARP00000043311	97.3	7.3e-100	COG0724	S	Function unknown	Rna-binding protein
TRINITY_DN17228_c0_g1	3694.POPTR_0011s17270.1	87.4	5.3e-149	COG1310	S	Function unknown	Component of the eukaryotic translation initiation factor 3 (eIF-3) complex, which is involved in protein synthesis and, together with other initiation factors, stimulates binding of mRNA and methionyl-tRNAi to the 40S ribosome (By similarity)
TRINITY_DN17229_c0_g1	3694.POPTR_0014s12620.1	32.5	4.1e-11	ENOG41122JH	S	Function unknown	heat shock factor binding protein
TRINITY_DN17231_c0_g1	29760.VIT_14s0066g00460.t01	33.3	1.4e-06	ENOG410XQ0C	T	Signal transduction mechanisms	serine threonine-protein kinase
TRINITY_DN17234_c0_g1	3694.POPTR_0019s10760.1	73.4	7.1e-57	ENOG410XTFS	O	Posttranslational modification, protein turnover, chaperones	Ring finger protein
TRINITY_DN17235_c0_g1	3847.GLYMA07G32043.1	73.6	3.1e-22	ENOG410Y16S	S	Function unknown	NA
TRINITY_DN17235_c0_g2	4113.PGSC0003DMT400079611	36.7	6e-32	ENOG410ZIWC	O	Posttranslational modification, protein turnover, chaperones	nucleoredoxin-like
TRINITY_DN17235_c0_g4	3847.GLYMA07G32043.1	80.3	8.1e-23	ENOG410Y16S	S	Function unknown	NA
TRINITY_DN17235_c0_g8	35128.Thaps260868	79.2	3.5e-24	ENOG410Y16S	S	Function unknown	NA
TRINITY_DN17242_c1_g1	3694.POPTR_0005s05450.1	94.1	2.9e-40	COG0451	M	Cell wall/membrane/envelope biogenesis	Nad-dependent epimerase dehydratase
TRINITY_DN17242_c1_g2	3702.AT5G28840.1	93.9	1e-17	COG0451	M	Cell wall/membrane/envelope biogenesis	Nad-dependent epimerase dehydratase
TRINITY_DN17243_c1_g3	3847.GLYMA18G50000.1	99.8	6e-280	COG1004	M	Cell wall/membrane/envelope biogenesis	UDP-glucose 6-dehydrogenase
TRINITY_DN17243_c1_g4	3847.GLYMA01G06970.1	100	1.1e-32	COG1004	M	Cell wall/membrane/envelope biogenesis	UDP-glucose 6-dehydrogenase
TRINITY_DN17243_c1_g5	39946.BGIOSGA013592-PA	100	2.3e-35	COG1004	M	Cell wall/membrane/envelope biogenesis	UDP-glucose 6-dehydrogenase
TRINITY_DN17243_c1_g6	4558.Sb01g043150.1	100	5.6e-31	COG1004	M	Cell wall/membrane/envelope biogenesis	UDP-glucose 6-dehydrogenase
TRINITY_DN17243_c1_g7	39946.BGIOSGA012914-PA	100	3.8e-15	COG1004	M	Cell wall/membrane/envelope biogenesis	UDP-glucose 6-dehydrogenase
TRINITY_DN17244_c0_g1	7955.ENSDARP00000020522	95.5	1.2e-77	ENOG410XQA0	K	Transcription	Splicing factor proline
TRINITY_DN17245_c0_g1	4081.Solyc04g056290.2.1	90.2	2.1e-189	ENOG410XQ81	O	Posttranslational modification, protein turnover, chaperones	ubiquitin carboxyl-terminal hydrolase
TRINITY_DN17247_c0_g1	3847.GLYMA02G02170.1	100	8.8e-16	COG0451	M	Cell wall/membrane/envelope biogenesis	Nad-dependent epimerase dehydratase
TRINITY_DN17248_c0_g2	39946.BGIOSGA013686-PA	100	4.7e-203	COG1304	C	Energy production and conversion	Catalyzes the 1,3-allylic rearrangement of the homoallylic substrate isopentenyl (IPP) to its allylic isomer, dimethylallyl diphosphate (DMAPP) (By similarity)
TRINITY_DN17249_c0_g1	39946.BGIOSGA019210-PA	100	5.3e-99	COG1727	J	Translation, ribosomal structure and biogenesis	Ribosomal protein
TRINITY_DN17249_c0_g5	29760.VIT_07s0005g00690.t01	89.2	9.5e-92	COG1727	J	Translation, ribosomal structure and biogenesis	Ribosomal protein
TRINITY_DN17249_c0_g6	3847.GLYMA19G42030.1	100	1.4e-29	COG1727	J	Translation, ribosomal structure and biogenesis	Ribosomal protein
TRINITY_DN17249_c0_g8	3847.GLYMA03G39420.1	100	1.9e-31	COG1727	J	Translation, ribosomal structure and biogenesis	Ribosomal protein
TRINITY_DN17250_c0_g1	3847.GLYMA08G07700.1	86.6	1.2e-131	ENOG410YFEH	S	Function unknown	alternative oxidase
TRINITY_DN17251_c0_g2	3847.GLYMA04G06770.1	50	7.4e-49	COG5183	O	Posttranslational modification, protein turnover, chaperones	(Membrane-Associated Ring finger (C3HC4))
TRINITY_DN17252_c0_g1	29760.VIT_14s0081g00460.t01	96.7	6.8e-26	COG5329	T	Signal transduction mechanisms	Phosphatase
TRINITY_DN17253_c0_g2	3847.GLYMA12G04950.1	100	4.6e-28	ENOG410XSF3	S	Function unknown	Dolichyl-diphosphooligosaccharide--protein glycosyltransferase
TRINITY_DN17256_c0_g1	3694.POPTR_0004s18400.1	97.2	4.2e-73	COG1156	C	Energy production and conversion	Produces ATP from ADP in the presence of a proton gradient across the membrane. The V-type beta chain is a regulatory subunit (By similarity)
TRINITY_DN17257_c0_g1	29760.VIT_00s0179g00100.t01	79.2	0	ENOG410ZP3V	S	Function unknown	Ethylene-overproduction protein
TRINITY_DN17259_c1_g2	29760.VIT_04s0008g01390.t01	61.4	8.5e-67	ENOG41127HC	S	Function unknown	RNA recognition motif containing protein
TRINITY_DN17259_c1_g3	29760.VIT_06s0004g07530.t01	80.3	1.4e-89	ENOG410XPZI	S	Function unknown	Small nuclear ribonucleoprotein
TRINITY_DN17259_c1_g6	4641.GSMUA_Achr10P01850_001	74.8	8.5e-92	ENOG410XPZI	S	Function unknown	Small nuclear ribonucleoprotein
TRINITY_DN17259_c1_g7	3694.POPTR_0019s14440.1	83.5	2.3e-35	ENOG410XPZI	S	Function unknown	Small nuclear ribonucleoprotein
TRINITY_DN1725_c0_g1	7955.ENSDARP00000111160	81.1	3.2e-27	NA	NA	NA	NA
TRINITY_DN17260_c0_g2	4081.Solyc12g056030.1.1	60.6	3e-39	ENOG410YSDH	S	Function unknown	NA
TRINITY_DN17261_c0_g1	4113.PGSC0003DMT400079117	75.1	1.4e-80	ENOG410XP7K	S	Function unknown	serine incorporator
TRINITY_DN17261_c0_g2	4113.PGSC0003DMT400079117	77.7	1.3e-39	ENOG410XP7K	S	Function unknown	serine incorporator
TRINITY_DN17262_c2_g1	39946.BGIOSGA000301-PA	100	1.3e-58	COG3588	G	Carbohydrate transport and metabolism	fructose-bisphosphate aldolase
TRINITY_DN17265_c0_g1	3694.POPTR_0015s03440.1	34.6	1.3e-33	ENOG410YDJW	G	Carbohydrate transport and metabolism	Heparanase
TRINITY_DN17266_c0_g1	69293.ENSGACP00000012260	55.5	1.9e-26	ENOG41115Q6	S	Function unknown	immunoglobulin kappa constant
TRINITY_DN17266_c1_g1	7955.ENSDARP00000081172	68.8	2.1e-32	ENOG410Y9T8	S	Function unknown	antigen binding
TRINITY_DN17266_c1_g2	7955.ENSDARP00000081172	69.3	1e-28	ENOG410Y9T8	S	Function unknown	antigen binding
TRINITY_DN17266_c1_g3	7955.ENSDARP00000120591	78.8	2.2e-26	ENOG41115Q6	S	Function unknown	immunoglobulin kappa constant
TRINITY_DN17267_c0_g1	29760.VIT_02s0025g01590.t01	65.2	1e-133	ENOG410YP6W	S	Function unknown	GDSL esterase lipase
TRINITY_DN17267_c0_g2	4081.Solyc05g006320.2.1	50.7	3.4e-29	ENOG41122EE	S	Function unknown	Sterile alpha motif (SAM) domain-containing protein
TRINITY_DN17268_c1_g1	39947.LOC_Os08g39760.1	51.6	3e-08	COG2801	L	Replication, recombination and repair	Retrotransposon protein
TRINITY_DN17269_c0_g1	3847.GLYMA13G21520.1	100	1.8e-59	COG2075	J	Translation, ribosomal structure and biogenesis	Ribosomal protein
TRINITY_DN17270_c0_g1	4081.Solyc12g099390.1.1	43.8	2.1e-49	ENOG411156E	S	Function unknown	Pfam:Di19
TRINITY_DN17272_c0_g1	3847.GLYMA13G40930.3	62.5	5.6e-16	ENOG4111JAW	S	Function unknown	Polymerase (DNA-directed), delta interacting protein 3
TRINITY_DN17273_c0_g2	4113.PGSC0003DMT400026096	42.7	2e-33	ENOG410YFA9	K	Transcription	MYB family transcription factor
TRINITY_DN17275_c0_g1	4113.PGSC0003DMT400005594	82.6	0	COG1241	L	Replication, recombination and repair	dna replication licensing factor
TRINITY_DN17276_c0_g1	39947.LOC_Os11g42630.1	48.2	1.9e-15	COG2801	L	Replication, recombination and repair	Retrotransposon protein
TRINITY_DN17276_c0_g3	3694.POPTR_0017s09810.1	51.8	7.7e-15	COG2801	L	Replication, recombination and repair	Retrotransposon protein
TRINITY_DN17276_c0_g6	4558.Sb06g007325.1	48.1	1.7e-13	COG2801	L	Replication, recombination and repair	Retrotransposon protein
TRINITY_DN17278_c0_g1	3847.GLYMA05G26320.1	94.2	1.2e-38	COG2163	J	Translation, ribosomal structure and biogenesis	(ribosomal) protein
TRINITY_DN17278_c0_g2	39946.BGIOSGA031388-PA	99.3	1.4e-69	COG2163	J	Translation, ribosomal structure and biogenesis	(ribosomal) protein
TRINITY_DN17279_c0_g1	3847.GLYMA05G04180.2	38	3.9e-16	ENOG410YZ3J	S	Function unknown	lipid transfer-like protein
TRINITY_DN17280_c0_g3	7955.ENSDARP00000089179	100	3.1e-106	COG0724	S	Function unknown	Rna-binding protein
TRINITY_DN17280_c0_g5	7955.ENSDARP00000124217	100	3.6e-152	COG0724	S	Function unknown	Rna-binding protein
TRINITY_DN17281_c0_g1	29760.VIT_12s0134g00570.t01	59.2	4.9e-99	COG5147	K	Transcription	Myblike DNAbinding domain containing protein
TRINITY_DN17281_c1_g3	3847.GLYMA14G07811.1	80.5	4e-08	ENOG410ZF9H	S	Function unknown	NA
TRINITY_DN17282_c0_g8	3694.POPTR_0001s42670.1	58.6	2.5e-45	ENOG41121N2	O	Posttranslational modification, protein turnover, chaperones	zinc ion binding
TRINITY_DN17282_c0_g9	3711.Bra013833.1-P	83.5	1.3e-52	COG3866	G	Carbohydrate transport and metabolism	pectate lyase activity
TRINITY_DN17283_c0_g2	4081.Solyc06g074980.2.1	100	7.4e-34	COG0464	O	Posttranslational modification, protein turnover, chaperones	Aaa atpase
TRINITY_DN17283_c1_g1	5786.XP_003290830.1	94	1.2e-33	COG0464	O	Posttranslational modification, protein turnover, chaperones	Aaa atpase
TRINITY_DN17283_c1_g2	3694.POPTR_0001s10780.1	72.1	0	COG0465	O	Posttranslational modification, protein turnover, chaperones	Acts as a processive, ATP-dependent zinc metallopeptidase for both cytoplasmic and membrane proteins. Plays a role in the quality control of integral membrane proteins (By similarity)
TRINITY_DN17283_c1_g3	4113.PGSC0003DMT400001202	72.2	1.4e-92	COG2229	S	Function unknown	atp gtp-binding protein
TRINITY_DN17284_c0_g1	3694.POPTR_0008s16440.1	66.1	8.2e-88	ENOG410Y9GR	S	Function unknown	Domain of unknown function (DUF296)
TRINITY_DN17286_c0_g1	3694.POPTR_0008s07760.1	75.6	1.2e-54	ENOG410YH10	S	Function unknown	NA
TRINITY_DN17290_c0_g1	29760.VIT_13s0139g00160.t01	93.8	1.9e-35	ENOG410XRCG	U	Intracellular trafficking, secretion, and vesicular transport	USO1 vesicle docking protein homolog (yeast)
TRINITY_DN17291_c4_g1	4081.Solyc09g072810.2.1	62.5	3.6e-41	COG4886	S	Function unknown	leucine Rich Repeat
TRINITY_DN17293_c0_g1	3694.POPTR_0012s05210.1	50.8	1.3e-66	ENOG410YIJY	K	Transcription	Transcription factor
TRINITY_DN17296_c0_g1	4113.PGSC0003DMT400047514	78.9	8.2e-108	ENOG4111CGI	S	Function unknown	Methyltransferase
TRINITY_DN17297_c0_g1	4113.PGSC0003DMT400009137	56.7	1.2e-65	NA	NA	NA	NA
TRINITY_DN17297_c0_g6	3847.GLYMA02G14110.2	84.5	1.3e-161	COG0572	F	Nucleotide transport and metabolism	uridine kinase
TRINITY_DN17297_c0_g7	29760.VIT_13s0147g00190.t01	72.9	4.8e-102	ENOG4111KM0	T	Signal transduction mechanisms	dual specificity protein phosphatase
TRINITY_DN17298_c0_g1	29760.VIT_06s0004g06110.t01	74.4	1.2e-277	COG1472	G	Carbohydrate transport and metabolism	hydrolase family 3
TRINITY_DN17299_c0_g1	3694.POPTR_0007s07250.1	51.5	5.9e-32	ENOG4111184	S	Function unknown	transmembrane protein 53
TRINITY_DN17299_c0_g2	4113.PGSC0003DMT400006741	74.1	2e-45	ENOG4111184	S	Function unknown	transmembrane protein 53
TRINITY_DN17300_c0_g1	29760.VIT_04s0023g00800.t01	67.2	6.4e-99	COG5200	A	RNA processing and modification	S. cerevisiae
TRINITY_DN17301_c0_g1	39946.BGIOSGA029912-PA	68.5	6.2e-23	COG0515	T	Signal transduction mechanisms	Serine Threonine protein kinase
TRINITY_DN17301_c0_g3	39946.BGIOSGA029909-PA	87.3	3.6e-33	NA	NA	NA	NA
TRINITY_DN17301_c1_g3	3694.POPTR_0011s12880.1	62	2e-67	COG0515	T	Signal transduction mechanisms	Serine Threonine protein kinase
TRINITY_DN17303_c0_g1	3847.GLYMA17G03350.1	100	2.6e-84	NA	NA	NA	NA
TRINITY_DN17304_c1_g4	39947.LOC_Os06g49720.1	30.6	3.3e-06	COG2801	L	Replication, recombination and repair	Retrotransposon protein
TRINITY_DN17305_c0_g1	29760.VIT_14s0068g01100.t01	43.2	3.7e-76	ENOG410Y85G	S	Function unknown	NA
TRINITY_DN17306_c0_g1	3847.GLYMA11G15680.5	100	2e-142	COG0376	P	Inorganic ion transport and metabolism	Bifunctional enzyme with both catalase and broad- spectrum peroxidase activity (By similarity)
TRINITY_DN17308_c0_g1	29760.VIT_18s0001g10500.t01	76.8	2.7e-208	COG2124	Q	Secondary metabolites biosynthesis, transport and catabolism	Cytochrome p450
TRINITY_DN17310_c1_g2	7955.ENSDARP00000115147	100	3.1e-129	COG0090	J	Translation, ribosomal structure and biogenesis	One of the primary rRNA binding proteins. Required for association of the 30S and 50S subunits to form the 70S ribosome, for tRNA binding and peptide bond formation. It has been suggested to have peptidyltransferase activity
TRINITY_DN17310_c1_g4	281687.CJA15580.1	77.9	1.6e-29	COG0090	J	Translation, ribosomal structure and biogenesis	One of the primary rRNA binding proteins. Required for association of the 30S and 50S subunits to form the 70S ribosome, for tRNA binding and peptide bond formation. It has been suggested to have peptidyltransferase activity
TRINITY_DN17313_c0_g1	29760.VIT_09s0002g04700.t01	58.6	3.4e-86	ENOG410YYXY	K	Transcription	Transcription factor
TRINITY_DN17316_c0_g3	39947.LOC_Os08g03450.1	100	4.4e-48	COG2126	J	Translation, ribosomal structure and biogenesis	Binds to the 23S rRNA (By similarity)
TRINITY_DN17317_c0_g1	39946.BGIOSGA012058-PA	100	1.4e-143	COG1890	J	Translation, ribosomal structure and biogenesis	Ribosomal protein
TRINITY_DN17317_c0_g3	4577.GRMZM2G013457_P01	100	6.2e-43	COG1890	J	Translation, ribosomal structure and biogenesis	Ribosomal protein
TRINITY_DN17318_c0_g1	3847.GLYMA19G40960.1	72.8	1.1e-117	COG3979	G	Carbohydrate transport and metabolism	chitinase
TRINITY_DN17319_c0_g1	3847.GLYMA19G44770.1	35.4	5.2e-20	ENOG410Z451	S	Function unknown	NA
TRINITY_DN17320_c0_g1	7955.ENSDARP00000091586	98.5	2.6e-54	COG2004	J	Translation, ribosomal structure and biogenesis	40S ribosomal protein S24
TRINITY_DN17320_c0_g2	9606.ENSP00000414321	100	3.4e-58	COG2004	J	Translation, ribosomal structure and biogenesis	40S ribosomal protein S24
TRINITY_DN17321_c0_g1	4113.PGSC0003DMT400021800	81.1	2.6e-83	ENOG4111K44	O	Posttranslational modification, protein turnover, chaperones	Rho GDP dissociation inhibitor (GDI)
TRINITY_DN17322_c0_g2	8090.ENSORLP00000024964	96.6	1.5e-94	COG2157	J	Translation, ribosomal structure and biogenesis	ribosomal protein
TRINITY_DN17322_c0_g3	9606.ENSP00000222247	100	2.6e-94	COG2157	J	Translation, ribosomal structure and biogenesis	ribosomal protein
TRINITY_DN17323_c0_g1	3694.POPTR_0015s10670.1	62.3	1e-39	ENOG410Y42C	S	Function unknown	Det1 complexing ubiquitin ligase
TRINITY_DN17325_c0_g1	7955.ENSDARP00000053541	100	1.4e-69	COG1358	J	Translation, ribosomal structure and biogenesis	(ribosomal) protein
TRINITY_DN17326_c0_g2	3694.POPTR_0003s00740.1	38.8	2e-07	ENOG410Y65V	S	Function unknown	Retrotransposon protein
TRINITY_DN17328_c0_g3	4113.PGSC0003DMT400027996	82.4	2.3e-260	COG1215	M	Cell wall/membrane/envelope biogenesis	Glycosyl transferase, family 2
TRINITY_DN17330_c0_g1	8128.ENSONIP00000017731	55.4	1.4e-30	ENOG410ZYS4	S	Function unknown	fibrinogen
TRINITY_DN17333_c2_g14	4081.Solyc09g074470.2.1	60	9.9e-35	ENOG410YK0V	S	Function unknown	kinase interacting family protein
TRINITY_DN17333_c2_g15	29760.VIT_08s0040g01280.t01	73.4	1.2e-120	ENOG4111CBK	S	Function unknown	UBA domain containing 2
TRINITY_DN17333_c2_g2	3694.POPTR_0006s12300.1	79.1	1.1e-34	COG4642	S	Function unknown	whole genome shotgun sequence
TRINITY_DN17333_c2_g2	3694.POPTR_0006s12300.1	79.1	1.1e-34	COG5253	T	Signal transduction mechanisms	phosphatidylinositol-4-phosphate 5-kinase
TRINITY_DN17334_c1_g1	4113.PGSC0003DMT400070214	46.9	4.1e-22	COG1819	S	Function unknown	Transferase
TRINITY_DN17335_c0_g1	7955.ENSDARP00000123227	61.9	7.9e-61	ENOG4110S2J	S	Function unknown	NA
TRINITY_DN17335_c0_g2	29760.VIT_04s0008g05800.t01	54.7	5.3e-19	ENOG410YFEE	S	Function unknown	NA
TRINITY_DN17335_c0_g3	3847.GLYMA04G06560.5	56.7	1.8e-68	ENOG410XQW7	S	Function unknown	PDS5, regulator of cohesion maintenance, homolog
TRINITY_DN17337_c0_g1	29760.VIT_06s0004g04610.t01	58.3	1.2e-104	ENOG4112B5J	S	Function unknown	Fasciclin-like arabinogalactan protein
TRINITY_DN17341_c0_g1	29760.VIT_05s0077g01800.t01	79.7	1.3e-106	ENOG411081H	S	Function unknown	NA
TRINITY_DN17344_c0_g1	3694.POPTR_0003s12980.1	70.9	3e-18	ENOG410XRC5	O	Posttranslational modification, protein turnover, chaperones	ubiquitin-conjugating enzyme
TRINITY_DN17344_c0_g2	4081.Solyc11g071870.1.1	58.8	9.8e-24	ENOG410XRC5	O	Posttranslational modification, protein turnover, chaperones	ubiquitin-conjugating enzyme
TRINITY_DN17346_c0_g1	4081.Solyc04g014370.2.1	79.5	2.7e-98	COG5198	S	Function unknown	Protein tyrosine phosphatase-like
TRINITY_DN17347_c0_g1	7955.ENSDARP00000072300	100	3.2e-43	COG2051	J	Translation, ribosomal structure and biogenesis	40s ribosomal protein S27
TRINITY_DN17347_c0_g2	7955.ENSDARP00000072300	96.4	3.6e-42	COG2051	J	Translation, ribosomal structure and biogenesis	40s ribosomal protein S27
TRINITY_DN17347_c0_g3	7955.ENSDARP00000029079	100	2.7e-37	COG2051	J	Translation, ribosomal structure and biogenesis	40s ribosomal protein S27
TRINITY_DN17348_c0_g1	7955.ENSDARP00000075490	100	1.3e-133	COG0474	P	Inorganic ion transport and metabolism	P-type atpase
TRINITY_DN17349_c2_g1	4081.Solyc03g062860.1.1	43.2	1e-40	ENOG4111YC2	L	Replication, recombination and repair	Tkp5 protein
TRINITY_DN17349_c2_g2	4081.Solyc03g062860.1.1	44.7	1.9e-15	ENOG4111YC2	L	Replication, recombination and repair	Tkp5 protein
TRINITY_DN17352_c0_g1	4113.PGSC0003DMT400033244	49.4	2.4e-85	ENOG4110FD4	S	Function unknown	BSD domain containing 1
TRINITY_DN17353_c1_g4	3694.POPTR_0001s29900.1	57.9	8.6e-25	COG2939	E	Amino acid transport and metabolism	carboxy-peptidase
TRINITY_DN17358_c0_g1	29760.VIT_07s0141g00040.t01	79.6	4.7e-81	COG0631	T	Signal transduction mechanisms	Phosphatase
TRINITY_DN17361_c0_g2	29760.VIT_08s0056g01170.t01	52.4	6.4e-211	ENOG410Y4K7	S	Function unknown	zinc finger protein VAR3, chloroplastic-like
TRINITY_DN17362_c0_g1	4113.PGSC0003DMT400019561	62.7	1.4e-169	COG2124	Q	Secondary metabolites biosynthesis, transport and catabolism	Cytochrome p450
TRINITY_DN17363_c0_g2	29760.VIT_18s0001g14100.t01	56.8	6.5e-78	COG5052	U	Intracellular trafficking, secretion, and vesicular transport	receptor accessory protein
TRINITY_DN17367_c0_g1	4081.Solyc02g079950.2.1	80	7.9e-32	ENOG4111SJA	S	Function unknown	oxygen-evolving enhancer protein
TRINITY_DN17367_c1_g1	29760.VIT_06s0080g00910.t01	42.8	1.7e-58	ENOG410YK80	S	Function unknown	F-box protein
TRINITY_DN17368_c0_g2	4113.PGSC0003DMT400084744	63	1.1e-92	ENOG410YA8E	S	Function unknown	Pfam:DUF579
TRINITY_DN17370_c0_g1	3694.POPTR_0007s04060.1	47.9	3.9e-17	ENOG410ZA5Y	S	Function unknown	LysM domain
TRINITY_DN17373_c0_g1	29760.VIT_05s0077g01450.t01	68.2	2e-18	COG5641	K	Transcription	Transcription factor
TRINITY_DN17374_c0_g8	4081.Solyc01g087120.2.1	77.4	1.2e-38	COG0712	C	Energy production and conversion	F(1)F(0) ATP synthase produces ATP from ADP in the presence of a proton or sodium gradient. F-type ATPases consist of two structural domains, F(1) containing the extramembraneous catalytic core and F(0) containing the membrane proton channel, linked together by a central stalk and a peripheral stalk. During catalysis, ATP synthesis in the catalytic domain of F(1) is coupled via a rotary mechanism…
TRINITY_DN17375_c0_g3	29760.VIT_12s0028g01320.t01	62.5	5.7e-58	ENOG4110PG3	K	Transcription	transcription elongation factor b
TRINITY_DN17376_c0_g1	4113.PGSC0003DMT400037746	79.2	4.8e-130	ENOG4111UE2	S	Function unknown	S1 P1 Nuclease
TRINITY_DN17376_c0_g3	3847.GLYMA01G19200.2	69.9	3.6e-70	ENOG4111REW	S	Function unknown	Methylketone synthase
TRINITY_DN17380_c0_g1	29760.VIT_14s0030g01270.t01	95.1	3.2e-91	COG1498	J	Translation, ribosomal structure and biogenesis	Nucleolar protein
TRINITY_DN17380_c0_g3	39946.BGIOSGA010732-PA	100	1.1e-55	COG1498	J	Translation, ribosomal structure and biogenesis	Nucleolar protein
TRINITY_DN17380_c1_g1	29760.VIT_18s0072g00880.t01	63.6	9.6e-114	COG2123	J	Translation, ribosomal structure and biogenesis	Exosome complex
TRINITY_DN17383_c0_g1	3694.POPTR_0001s47270.1	80	1.1e-152	ENOG410XQV8	S	Function unknown	meprin and TRAF homology domain-containing protein MATH domain-containing protein
TRINITY_DN17385_c0_g1	29760.VIT_03s0038g02810.t01	82.3	3.3e-54	COG5195	S	Function unknown	INO80 complex subunit
TRINITY_DN17387_c0_g1	59689.fgenesh1_pm.C_scaffold_6002302	70.9	6.6e-36	ENOG411229A	S	Function unknown	glutaredoxin 2
TRINITY_DN17388_c0_g1	4081.Solyc11g006980.1.1	65.4	2.8e-70	ENOG410YH14	S	Function unknown	germin-like protein
TRINITY_DN17389_c0_g1	3694.POPTR_0019s02280.1	85.9	2.1e-22	COG5022	Z	Cytoskeleton	myosin heavy chain
TRINITY_DN17389_c0_g4	3694.POPTR_0008s19170.1	50	1.8e-08	COG0515	T	Signal transduction mechanisms	Serine Threonine protein kinase
TRINITY_DN17390_c0_g1	3694.POPTR_0001s31460.1	66.8	1.1e-76	ENOG410YG69	S	Function unknown	Alginate lyase
TRINITY_DN17391_c0_g1	29760.VIT_18s0001g08840.t01	55.4	2.3e-148	COG2939	E	Amino acid transport and metabolism	carboxy-peptidase
TRINITY_DN17392_c0_g1	4081.Solyc06g065980.2.1	78.3	5.5e-47	ENOG41121TC	S	Function unknown	Alba
TRINITY_DN17392_c1_g4	4081.Solyc06g065980.2.1	77.5	1.6e-28	ENOG41121TC	S	Function unknown	Alba
TRINITY_DN17393_c0_g2	29760.VIT_01s0146g00310.t01	93.2	2.1e-66	COG0022	C	Energy production and conversion	Dehydrogenase, E1 component
TRINITY_DN17393_c1_g1	4081.Solyc06g072580.2.1	92.8	2.1e-36	COG0022	C	Energy production and conversion	Dehydrogenase, E1 component
TRINITY_DN17394_c0_g1	3847.GLYMA02G35990.1	99.2	2.1e-71	ENOG4111MDW	O	Posttranslational modification, protein turnover, chaperones	ubiquitin-conjugating enzyme
TRINITY_DN17398_c0_g3	29760.VIT_13s0019g04120.t01	60	6.1e-119	ENOG410XQM0	S	Function unknown	Transmembrane protein 115
TRINITY_DN17399_c0_g1	29760.VIT_08s0007g07320.t01	46.3	5.8e-46	ENOG410YZPN	S	Function unknown	NA
TRINITY_DN17400_c0_g1	4113.PGSC0003DMT400056340	62.2	1.3e-22	NA	NA	NA	NA
TRINITY_DN17402_c1_g1	29760.VIT_07s0205g00160.t01	48.5	3.3e-34	ENOG41103SF	K	Transcription	Transcription factor
TRINITY_DN17402_c1_g2	3711.Bra012130.1-P	52.7	1.9e-27	ENOG410YQ19	S	Function unknown	Rapid ALkalinization Factor (RALF)
TRINITY_DN17402_c1_g3	3711.Bra014935.1-P	84.3	9e-61	ENOG41116RU	S	Function unknown	light-dependent short hypocotyls 1
TRINITY_DN17403_c0_g1	4113.PGSC0003DMT400014837	31.5	4.2e-06	ENOG4110HDW	S	Function unknown	RWP-RK domain-containing protein
TRINITY_DN17404_c0_g1	3694.POPTR_0008s09030.1	89.8	1.9e-135	COG0515	T	Signal transduction mechanisms	Serine Threonine protein kinase
TRINITY_DN17405_c0_g1	9593.ENSGGOP00000017738	82.2	2.2e-105	COG1528	P	Inorganic ion transport and metabolism	Stores iron in a soluble, non-toxic, readily available form. Important for iron homeostasis (By similarity)
TRINITY_DN17405_c0_g2	7955.ENSDARP00000026092	98.3	4.5e-95	COG1528	P	Inorganic ion transport and metabolism	Stores iron in a soluble, non-toxic, readily available form. Important for iron homeostasis (By similarity)
TRINITY_DN17406_c0_g3	3694.POPTR_0006s23930.1	41.1	1.1e-56	ENOG410YYZ5	S	Function unknown	NA
TRINITY_DN17409_c0_g1	29760.VIT_15s0048g01760.t01	61.5	3.8e-173	ENOG410XQAG	S	Function unknown	Ankyrin repeat and zinc finger domain containing 1
TRINITY_DN17410_c1_g4	29760.VIT_06s0004g00920.t01	60.9	1.1e-166	COG5542	S	Function unknown	Phosphatidylinositol glycan anchor biosynthesis class V
TRINITY_DN17411_c0_g1	4113.PGSC0003DMT400064232	76.2	8.1e-261	COG2217	P	Inorganic ion transport and metabolism	p-type ATPase
TRINITY_DN17411_c0_g2	29760.VIT_07s0129g01040.t01	74.1	3.3e-36	COG2217	P	Inorganic ion transport and metabolism	p-type ATPase
TRINITY_DN17412_c0_g3	3694.POPTR_0001s10290.1	95.7	1.1e-19	COG5078	O	Posttranslational modification, protein turnover, chaperones	ubiquitin-conjugating enzyme
TRINITY_DN17412_c0_g4	15368.BRADI2G22200.1	98.8	8e-40	COG5078	O	Posttranslational modification, protein turnover, chaperones	ubiquitin-conjugating enzyme
TRINITY_DN17412_c0_g7	4533.OB06G30780.1	52.9	2.4e-10	ENOG410ZQDJ	S	Function unknown	Domain of unknown function (DUF2828)
TRINITY_DN17414_c0_g1	29760.VIT_12s0134g00410.t01	79.5	1.7e-47	COG1965	P	Inorganic ion transport and metabolism	frataxin-like protein
TRINITY_DN17414_c0_g2	29760.VIT_12s0134g00410.t01	74.4	3.3e-49	COG1965	P	Inorganic ion transport and metabolism	frataxin-like protein
TRINITY_DN17415_c0_g1	3711.Bra002762.1-P	71	1.6e-36	ENOG410XNNC	P	Inorganic ion transport and metabolism	ATPase, Ca transporting, plasma membrane
TRINITY_DN17415_c0_g2	4081.Solyc07g008320.2.1	68.9	6.6e-32	ENOG410XNNC	P	Inorganic ion transport and metabolism	ATPase, Ca transporting, plasma membrane
TRINITY_DN17416_c0_g1	6238.CBG20492	48.6	1.2e-08	ENOG410XS0X	S	Function unknown	peptidyl-glycine alpha-amidating monooxygenase
TRINITY_DN17417_c0_g1	29760.VIT_01s0011g04180.t01	68.1	3.4e-71	COG0671	I	Lipid transport and metabolism	PHOsphatase
TRINITY_DN17418_c0_g1	29760.VIT_05s0020g00810.t01	85	3.2e-48	COG0087	J	Translation, ribosomal structure and biogenesis	One of the primary rRNA binding proteins, it binds directly near the 3'-end of the 23S rRNA, where it nucleates assembly of the 50S subunit (By similarity)
TRINITY_DN17419_c0_g1	4577.AC212565.3_FGP001	94.9	9.9e-33	COG2036	B	Chromatin structure and dynamics	Core component of nucleosome. Nucleosomes wrap and compact DNA into chromatin, limiting DNA accessibility to the cellular machineries which require DNA as a template. Histones thereby play a central role in transcription regulation, DNA repair, DNA replication and chromosomal stability. DNA accessibility is regulated via a complex set of post-translational modifications of histones, also called h…
TRINITY_DN17419_c1_g3	3694.POPTR_0005s12750.1	55.2	1.6e-60	ENOG410YJFN	K	Transcription	Transcription factor
TRINITY_DN17421_c0_g1	29760.VIT_15s0046g03410.t01	42	2.1e-81	COG1446	E	Amino acid transport and metabolism	asparaginase
TRINITY_DN17421_c0_g2	3694.POPTR_0014s07640.1	83	1.5e-41	COG1446	E	Amino acid transport and metabolism	asparaginase
TRINITY_DN17422_c1_g1	3847.GLYMA03G40110.1	100	1.4e-51	COG0100	J	Translation, ribosomal structure and biogenesis	Located on the platform of the 30S subunit, it bridges several disparate RNA helices of the 16S rRNA. Forms part of the Shine-Dalgarno cleft in the 70S ribosome (By similarity)
TRINITY_DN17422_c1_g3	9593.ENSGGOP00000021460	99.4	1.1e-80	COG0100	J	Translation, ribosomal structure and biogenesis	Located on the platform of the 30S subunit, it bridges several disparate RNA helices of the 16S rRNA. Forms part of the Shine-Dalgarno cleft in the 70S ribosome (By similarity)
TRINITY_DN17422_c1_g5	8049.ENSGMOP00000013261	100	2.4e-74	COG0100	J	Translation, ribosomal structure and biogenesis	Located on the platform of the 30S subunit, it bridges several disparate RNA helices of the 16S rRNA. Forms part of the Shine-Dalgarno cleft in the 70S ribosome (By similarity)
TRINITY_DN17423_c0_g1	3694.POPTR_0014s14110.1	33.4	7e-114	ENOG410XU84	S	Function unknown	NA
TRINITY_DN17424_c0_g1	4081.Solyc02g067980.2.1	78.4	4.7e-225	ENOG410XQJW	T	Signal transduction mechanisms	Protein phosphatase 2, regulatory subunit B
TRINITY_DN17426_c0_g1	4081.Solyc06g062350.2.1	93.8	6.6e-236	COG1224	K	Transcription	ruvB-like
TRINITY_DN17427_c0_g1	29760.VIT_06s0004g07060.t01	83.6	5.3e-125	COG0476	H	Coenzyme transport and metabolism	small protein activating enzyme activity
TRINITY_DN17428_c0_g1	4081.Solyc06g069390.2.1	80	3e-31	COG1650	S	Function unknown	Hydrolyzes D-tyrosyl-tRNA(Tyr) into D-tyrosine and free tRNA(Tyr) (By similarity)
TRINITY_DN17428_c0_g2	29760.VIT_17s0000g04890.t01	45.4	3.4e-47	COG1650	S	Function unknown	Hydrolyzes D-tyrosyl-tRNA(Tyr) into D-tyrosine and free tRNA(Tyr) (By similarity)
TRINITY_DN17429_c1_g2	29760.VIT_11s0016g02870.t01	69.6	3.2e-124	COG0612	O	Posttranslational modification, protein turnover, chaperones	peptidase'
TRINITY_DN17430_c0_g3	3694.POPTR_0012s07880.1	56	1e-45	ENOG41113T2	S	Function unknown	NA
TRINITY_DN17430_c0_g5	4081.Solyc09g007060.2.1	50.4	6.9e-71	ENOG41121N2	O	Posttranslational modification, protein turnover, chaperones	zinc ion binding
TRINITY_DN17430_c0_g6	3694.POPTR_0024s00700.1	59.6	4.4e-45	ENOG410YQR5	S	Function unknown	Protein of unknown function, DUF538
TRINITY_DN17433_c0_g1	29760.VIT_18s0001g05130.t01	56.3	5.1e-114	ENOG410ZM57	S	Function unknown	Metallophosphoesterase 1
TRINITY_DN17434_c0_g1	7955.ENSDARP00000067802	100	8.7e-133	COG0092	J	Translation, ribosomal structure and biogenesis	Binds the lower part of the 30S subunit head. Binds mRNA in the 70S ribosome, positioning it for translation (By similarity)
TRINITY_DN17435_c0_g1	29760.VIT_13s0064g01270.t01	70	1.4e-95	COG0219	J	Translation, ribosomal structure and biogenesis	Methylates the ribose at the nucleotide 34 wobble position in the two leucyl isoacceptors tRNA(Leu)(CmAA) and tRNA(Leu)(cmnm5UmAA). Catalyzes the methyl transfer from S- adenosyl-L-methionine to the 2'-OH of the wobble nucleotide (By similarity)
TRINITY_DN17437_c0_g3	29760.VIT_00s0225g00130.t01	90.6	3e-258	COG0436	E	Amino acid transport and metabolism	aminotransferase
TRINITY_DN17438_c0_g1	7955.ENSDARP00000100306	79.6	7.3e-128	ENOG4111Q82	S	Function unknown	free fatty acid receptor
TRINITY_DN17448_c2_g1	3694.POPTR_0013s11550.1	60.5	5.8e-16	ENOG4111DTS	S	Function unknown	Auxin responsive protein
TRINITY_DN17448_c2_g4	29760.VIT_17s0000g03610.t01	36.9	2.6e-14	ENOG410YDW8	S	Function unknown	CRS1_YhbY
TRINITY_DN17449_c0_g3	29760.VIT_11s0037g00600.t01	85.7	7.3e-80	COG5126	D	Cell cycle control, cell division, chromosome partitioning	Calcium-binding protein
TRINITY_DN17449_c0_g3	29760.VIT_11s0037g00600.t01	85.7	7.3e-80	COG5126	T	Signal transduction mechanisms	Calcium-binding protein
TRINITY_DN17449_c0_g3	29760.VIT_11s0037g00600.t01	85.7	7.3e-80	COG5126	Z	Cytoskeleton	Calcium-binding protein
TRINITY_DN17449_c0_g4	4081.Solyc10g049530.1.1	60.4	4.1e-64	ENOG411206Y	S	Function unknown	transposon protein
TRINITY_DN17449_c0_g5	29760.VIT_10s0003g04530.t01	79.4	3.8e-22	COG0531	E	Amino acid transport and metabolism	amino acid
TRINITY_DN1744_c0_g1	9606.ENSP00000355046	91.2	2.2e-104	COG1009	C	Energy production and conversion	subunit l
TRINITY_DN17450_c1_g1	3694.POPTR_0001s42060.1	41.3	4.5e-08	COG0515	T	Signal transduction mechanisms	Serine Threonine protein kinase
TRINITY_DN17450_c1_g2	3694.POPTR_0011s02160.1	47.2	3.2e-09	COG0515	T	Signal transduction mechanisms	Serine Threonine protein kinase
TRINITY_DN17451_c3_g1	29760.VIT_18s0001g06330.t01	86.9	1.4e-120	COG5040	T	Signal transduction mechanisms	Tyrosine 3-monooxygenase tryptophan 5-monooxygenase activation protein
TRINITY_DN17451_c3_g2	4081.Solyc11g010200.1.1	87.6	1.2e-81	COG5040	T	Signal transduction mechanisms	Tyrosine 3-monooxygenase tryptophan 5-monooxygenase activation protein
TRINITY_DN17451_c3_g3	39946.BGIOSGA034990-PA	100	8.6e-18	ENOG41119BM	S	Function unknown	NA
TRINITY_DN17451_c3_g5	7955.ENSDARP00000062382	100	2.1e-38	COG5040	T	Signal transduction mechanisms	Tyrosine 3-monooxygenase tryptophan 5-monooxygenase activation protein
TRINITY_DN17452_c1_g3	29760.VIT_18s0122g01320.t01	91.1	2.3e-283	COG0753	P	Inorganic ion transport and metabolism	Catalase
TRINITY_DN17453_c0_g2	29760.VIT_16s0100g00640.t01	59.6	1.6e-98	COG0705	S	Function unknown	rhomboid family
TRINITY_DN17454_c1_g2	3694.POPTR_0004s12380.1	84.7	1.7e-131	ENOG4111HQB	S	Function unknown	EID1-like F-box protein
TRINITY_DN17454_c1_g7	3847.GLYMA08G26400.2	83.5	5.2e-129	ENOG4111HQB	S	Function unknown	EID1-like F-box protein
TRINITY_DN17455_c0_g1	39947.LOC_Os12g18840.1	50.6	1.2e-14	COG2801	L	Replication, recombination and repair	Retrotransposon protein
TRINITY_DN17455_c1_g1	4641.GSMUA_AchrUn_randomP11040_001	50.8	5.7e-27	COG2801	L	Replication, recombination and repair	Retrotransposon protein
TRINITY_DN17455_c1_g9	3694.POPTR_0017s09810.1	48.1	3.2e-20	COG2801	L	Replication, recombination and repair	Retrotransposon protein
TRINITY_DN17456_c0_g2	7955.ENSDARP00000100467	88.9	8.3e-10	NA	NA	NA	NA
TRINITY_DN17457_c2_g1	29760.VIT_07s0031g00210.t01	68.1	5.7e-246	ENOG410XR5X	S	Function unknown	poly(A) binding protein, cytoplasmic
TRINITY_DN17457_c2_g2	4081.Solyc03g080040.1.1	56.2	1.1e-29	ENOG4112D0X	O	Posttranslational modification, protein turnover, chaperones	serine protease inhibitor, Kazal-type family protein
TRINITY_DN17458_c1_g2	3694.POPTR_0003s02350.1	66.1	1.1e-54	ENOG410Y1R0	S	Function unknown	NA
TRINITY_DN17458_c1_g3	29760.VIT_11s0118g00550.t01	40.3	4.3e-21	ENOG4111AYR	S	Function unknown	NA
TRINITY_DN17459_c0_g1	29760.VIT_00s0282g00010.t01	90.1	9.4e-54	COG0229	O	Posttranslational modification, protein turnover, chaperones	)-reductase
TRINITY_DN17461_c0_g1	13735.ENSPSIP00000001938	87.9	3.3e-83	ENOG410XZB8	S	Function unknown	NA
TRINITY_DN17461_c0_g2	29875.EHK21457	78.9	1.2e-23	ENOG410XZB8	S	Function unknown	NA
TRINITY_DN17462_c0_g1	4113.PGSC0003DMT400050552	53.9	1.1e-141	COG1819	S	Function unknown	Transferase
TRINITY_DN17464_c0_g1	29760.VIT_04s0023g02970.t01	89.2	7.2e-212	ENOG410XT40	S	Function unknown	Chromosome 16 open reading frame 70
TRINITY_DN17466_c0_g1	3694.POPTR_0017s03500.1	72.5	1.5e-59	COG5097	K	Transcription	component of the Mediator complex, a coactivator involved in the regulated transcription of nearly all RNA polymerase II-dependent genes. Mediator functions as a bridge to convey information from gene-specific regulatory proteins to the basal RNA polymerase II transcription machinery. Mediator is recruited to promoters by direct interactions with regulatory proteins and serves as a scaffold for t…
TRINITY_DN17467_c0_g1	29760.VIT_18s0001g09930.t01	64.9	1.5e-65	ENOG411274C	S	Function unknown	Protein of unknown function (DUF3223)
TRINITY_DN17468_c0_g1	4113.PGSC0003DMT400021746	69.9	8.8e-19	ENOG410Z7V6	S	Function unknown	NA
TRINITY_DN17468_c0_g2	3847.GLYMA17G01030.1	76.5	3.1e-28	ENOG410ZUCS	S	Function unknown	NA
TRINITY_DN17474_c0_g1	3847.GLYMA09G41850.1	100	3.3e-44	ENOG410XS7T	S	Function unknown	o-methyltransferase
TRINITY_DN17475_c0_g1	29760.VIT_14s0060g02420.t01	60.2	5.1e-290	ENOG410XTAA	S	Function unknown	lysine (K)-specific demethylase
TRINITY_DN17476_c0_g1	29760.VIT_12s0028g03870.t01	43.7	3.6e-82	ENOG410Z7Z7	S	Function unknown	Pentatricopeptide repeat-containing protein
TRINITY_DN17477_c0_g1	3694.POPTR_0001s40130.1	79.9	8.6e-182	COG0407	H	Coenzyme transport and metabolism	Catalyzes the decarboxylation of four acetate groups of uroporphyrinogen-III to yield coproporphyrinogen-III (By similarity)
TRINITY_DN17480_c0_g2	3847.GLYMA09G38110.1	100	8.3e-12	COG1156	C	Energy production and conversion	Produces ATP from ADP in the presence of a proton gradient across the membrane. The V-type beta chain is a regulatory subunit (By similarity)
TRINITY_DN17480_c0_g5	4641.GSMUA_Achr8P05550_001	88.4	6.2e-113	COG1156	C	Energy production and conversion	Produces ATP from ADP in the presence of a proton gradient across the membrane. The V-type beta chain is a regulatory subunit (By similarity)
TRINITY_DN17480_c0_g7	4558.Sb04g007800.1	99.3	8.6e-74	COG1156	C	Energy production and conversion	Produces ATP from ADP in the presence of a proton gradient across the membrane. The V-type beta chain is a regulatory subunit (By similarity)
TRINITY_DN17481_c0_g1	4113.PGSC0003DMT400094705	72	3.9e-53	ENOG410Y1GU	S	Function unknown	NA
TRINITY_DN17482_c0_g2	7955.ENSDARP00000004236	83.9	1.6e-15	ENOG4111N7I	S	Function unknown	DAZ associated protein 2
TRINITY_DN17483_c1_g2	3694.POPTR_0016s02080.1	42.4	4e-06	ENOG410YMD2	S	Function unknown	NA
TRINITY_DN17483_c2_g1	4081.Solyc04g015850.2.1	45.8	3.8e-35	ENOG410YJZ8	S	Function unknown	NA
TRINITY_DN17483_c2_g6	3694.POPTR_0006s04860.1	57.7	3.8e-65	ENOG410YJZ8	S	Function unknown	NA
TRINITY_DN17483_c2_g8	3694.POPTR_0001s18360.1	75.7	4.6e-22	ENOG41125TJ	S	Function unknown	Sorting nexin C terminal
TRINITY_DN17485_c0_g1	39946.BGIOSGA003601-PA	100	3.2e-59	COG5262	B	Chromatin structure and dynamics	histone h2a
TRINITY_DN17486_c0_g1	29760.VIT_03s0063g00270.t01	70.1	6.7e-207	ENOG411091J	S	Function unknown	Pfam:DUF88
TRINITY_DN17488_c0_g1	29760.VIT_11s0016g01340.t01	58.3	1.1e-68	ENOG4111VSH	S	Function unknown	stress responsive A B Barrel domain containing protein, expressed
TRINITY_DN17491_c0_g2	7955.ENSDARP00000031665	98.8	1.5e-42	ENOG410ZZC0	S	Function unknown	negative regulation of nuclear-transcribed mRNA poly(A) tail shortening
TRINITY_DN17491_c0_g6	29760.VIT_00s0291g00060.t01	83.8	5.5e-33	COG0306	P	Inorganic ion transport and metabolism	inorganic phosphate transmembrane transporter activity
TRINITY_DN17492_c0_g1	4113.PGSC0003DMT400057824	74.5	7.9e-148	COG5333	D	Cell cycle control, cell division, chromosome partitioning	Component of the Mediator complex, a coactivator involved in regulated gene transcription of nearly all RNA polymerase II-dependent genes. Mediator functions as a bridge to convey information from gene-specific regulatory proteins to the basal RNA polymerase II transcription machinery. Mediator is recruited to promoters by direct interactions with regulatory proteins and serves as a scaffold for …
TRINITY_DN17492_c0_g1	4113.PGSC0003DMT400057824	74.5	7.9e-148	COG5333	K	Transcription	Component of the Mediator complex, a coactivator involved in regulated gene transcription of nearly all RNA polymerase II-dependent genes. Mediator functions as a bridge to convey information from gene-specific regulatory proteins to the basal RNA polymerase II transcription machinery. Mediator is recruited to promoters by direct interactions with regulatory proteins and serves as a scaffold for …
TRINITY_DN17492_c0_g1	4113.PGSC0003DMT400057824	74.5	7.9e-148	COG5333	L	Replication, recombination and repair	Component of the Mediator complex, a coactivator involved in regulated gene transcription of nearly all RNA polymerase II-dependent genes. Mediator functions as a bridge to convey information from gene-specific regulatory proteins to the basal RNA polymerase II transcription machinery. Mediator is recruited to promoters by direct interactions with regulatory proteins and serves as a scaffold for …
TRINITY_DN17494_c2_g3	3694.POPTR_0004s02810.1	48.6	1.3e-15	NA	NA	NA	NA
TRINITY_DN17496_c0_g1	3847.GLYMA09G38100.1	90.2	1.2e-65	ENOG4111IEZ	U	Intracellular trafficking, secretion, and vesicular transport	trafficking protein particle complex
TRINITY_DN17497_c0_g1	29760.VIT_11s0065g00640.t01	79.4	4.7e-42	COG1657	I	Lipid transport and metabolism	Squalene--hopene cyclase
TRINITY_DN17498_c0_g1	9606.ENSP00000307889	100	1.3e-61	COG4352	J	Translation, ribosomal structure and biogenesis	cytoplasmic translation
TRINITY_DN17498_c0_g2	7955.ENSDARP00000047390	100	4.2e-83	COG4352	J	Translation, ribosomal structure and biogenesis	cytoplasmic translation
TRINITY_DN17498_c0_g3	7955.ENSDARP00000047390	93.5	1.8e-96	COG4352	J	Translation, ribosomal structure and biogenesis	cytoplasmic translation
TRINITY_DN17500_c0_g1	29760.VIT_12s0059g00260.t01	85.1	3.1e-51	ENOG410XRKD	A	RNA processing and modification	PRP6 pre-mRNA processing factor 6 homolog (S. cerevisiae)
TRINITY_DN17501_c0_g4	7955.ENSDARP00000083965	100	2.1e-50	ENOG410ZH8Y	K	Transcription	Cold shock domain containing E1, RNA-binding
TRINITY_DN17501_c0_g6	7955.ENSDARP00000083965	98.9	1.1e-42	ENOG410ZH8Y	K	Transcription	Cold shock domain containing E1, RNA-binding
TRINITY_DN17502_c0_g1	29760.VIT_10s0003g04600.t01	71.1	5.2e-232	COG5084	S	Function unknown	zinc finger
TRINITY_DN17502_c0_g5	3694.POPTR_0007s08390.1	95.9	4.4e-293	COG0480	J	Translation, ribosomal structure and biogenesis	Catalyzes the GTP-dependent ribosomal translocation step during translation elongation. During this step, the ribosome changes from the pre-translocational (PRE) to the post- translocational (POST) state as the newly formed A-site-bound peptidyl-tRNA and P-site-bound deacylated tRNA move to the P and E sites, respectively. Catalyzes the coordinated movement of the two tRNA molecules, the mRNA and…
TRINITY_DN17506_c0_g1	29760.VIT_07s0005g01740.t01	78	1.6e-100	ENOG410YEG4	S	Function unknown	Zinc knuckle
TRINITY_DN17507_c0_g1	3694.POPTR_0014s12490.1	73.7	4e-73	ENOG41123SB	J	Translation, ribosomal structure and biogenesis	Involved in the biogenesis of the 60S ribosomal subunit (By similarity)
TRINITY_DN17508_c0_g1	4113.PGSC0003DMT400047011	48.8	8.3e-99	COG2812	L	Replication, recombination and repair	dna polymerase iii subunits gamma and tau
TRINITY_DN17508_c1_g1	3847.GLYMA02G05120.1	70.3	5e-55	COG5201	O	Posttranslational modification, protein turnover, chaperones	ubiquitin-dependent protein catabolic process
TRINITY_DN17509_c0_g1	4113.PGSC0003DMT400006604	39.8	2.8e-41	ENOG410YYWK	S	Function unknown	NA
TRINITY_DN17510_c0_g1	4533.OB08G19380.1	98.1	4.2e-140	COG1358	J	Translation, ribosomal structure and biogenesis	(ribosomal) protein
TRINITY_DN17512_c0_g1	29760.VIT_13s0019g01840.t01	80	1.5e-229	COG2319	S	Function unknown	wd repeat
TRINITY_DN17514_c0_g4	3847.GLYMA09G28650.4	98.7	7.3e-35	COG0459	O	Posttranslational modification, protein turnover, chaperones	Prevents misfolding and promotes the refolding and proper assembly of unfolded polypeptides generated under stress conditions (By similarity)
TRINITY_DN17514_c0_g5	29760.VIT_07s0130g00410.t01	94.8	2.5e-100	COG0459	O	Posttranslational modification, protein turnover, chaperones	Prevents misfolding and promotes the refolding and proper assembly of unfolded polypeptides generated under stress conditions (By similarity)
TRINITY_DN17515_c1_g1	3711.Bra000168.1-P	83.6	1.7e-24	ENOG410XPSW	S	Function unknown	phospholipase c
TRINITY_DN17517_c0_g1	3694.POPTR_0016s04550.1	54.4	7.4e-115	COG3239	I	Lipid transport and metabolism	linoleoyl-CoA desaturase activity
TRINITY_DN17518_c0_g1	29760.VIT_09s0002g00930.t01	91.1	5.2e-33	ENOG411224Q	K	Transcription	LSM1 homolog, U6 small nuclear RNA associated (S. cerevisiae)
TRINITY_DN17518_c0_g2	3694.POPTR_0014s02220.1	59.6	1.1e-47	ENOG410YPR2	S	Function unknown	F-box protein
TRINITY_DN17520_c0_g1	3847.GLYMA02G00490.3	99.1	3.5e-58	COG1911	J	Translation, ribosomal structure and biogenesis	(ribosomal) protein
TRINITY_DN17521_c1_g1	29760.VIT_14s0068g01690.t01	59	6.2e-67	ENOG410YH53	K	Transcription	Transcription factor
TRINITY_DN17521_c2_g1	4113.PGSC0003DMT400032254	60.6	1.8e-82	COG0515	T	Signal transduction mechanisms	Serine Threonine protein kinase
TRINITY_DN17523_c0_g2	39947.LOC_Os01g45050.1	42.9	6.3e-06	COG2801	L	Replication, recombination and repair	Retrotransposon protein
TRINITY_DN17525_c0_g1	39946.BGIOSGA029026-PA	99.2	2.1e-70	COG1717	J	Translation, ribosomal structure and biogenesis	(ribosomal) protein
TRINITY_DN17525_c0_g4	4641.GSMUA_Achr10P17110_001	87.8	7.6e-12	COG1717	J	Translation, ribosomal structure and biogenesis	(ribosomal) protein
TRINITY_DN17527_c0_g1	7955.ENSDARP00000004932	100	2.5e-89	COG5126	D	Cell cycle control, cell division, chromosome partitioning	Calcium-binding protein
TRINITY_DN17527_c0_g1	7955.ENSDARP00000004932	100	2.5e-89	COG5126	T	Signal transduction mechanisms	Calcium-binding protein
TRINITY_DN17527_c0_g1	7955.ENSDARP00000004932	100	2.5e-89	COG5126	Z	Cytoskeleton	Calcium-binding protein
TRINITY_DN17527_c0_g4	7955.ENSDARP00000079424	100	2.3e-42	ENOG410XQUX	S	Function unknown	guanine nucleotide binding protein (G protein), beta
TRINITY_DN17527_c0_g8	6085.XP_002162273	87.9	1.1e-29	ENOG410XQUX	S	Function unknown	guanine nucleotide binding protein (G protein), beta
TRINITY_DN17528_c0_g1	224914.BAWG_3065	78	3.7e-28	ENOG4111PC4	S	Function unknown	Pfam:Cw-hydrolase
TRINITY_DN17528_c0_g2	694569.D7S_0372	74.5	5.3e-14	ENOG4111PC4	S	Function unknown	Pfam:Cw-hydrolase
TRINITY_DN17529_c0_g1	3694.POPTR_0015s14330.1	81.1	2.2e-184	ENOG410XREJ	S	Function unknown	Pfam:DUF231
TRINITY_DN17529_c0_g3	29760.VIT_16s0022g01820.t01	74.8	5.5e-180	ENOG410YZBK	S	Function unknown	protein regulator of cytokinesis
TRINITY_DN17529_c0_g6	4113.PGSC0003DMT400000749	66.7	5.5e-14	ENOG410YNGG	S	Function unknown	NA
TRINITY_DN17530_c0_g1	39946.BGIOSGA022797-PA	99.1	2.1e-52	COG2097	J	Translation, ribosomal structure and biogenesis	(ribosomal) protein
TRINITY_DN17530_c1_g1	7955.ENSDARP00000124804	100	1.3e-56	COG2097	J	Translation, ribosomal structure and biogenesis	(ribosomal) protein
TRINITY_DN17530_c1_g2	7955.ENSDARP00000124804	100	1.8e-29	COG2097	J	Translation, ribosomal structure and biogenesis	(ribosomal) protein
TRINITY_DN17530_c2_g1	4577.GRMZM2G165619_P03	96.7	2.3e-29	COG0199	J	Translation, ribosomal structure and biogenesis	Binds 16S rRNA, required for the assembly of 30S particles and may also be responsible for determining the conformation of the 16S rRNA at the A site (By similarity)
TRINITY_DN17533_c0_g1	4558.Sb02g029380.1	89.1	2.1e-126	COG1358	J	Translation, ribosomal structure and biogenesis	(ribosomal) protein
TRINITY_DN17534_c0_g1	29760.VIT_10s0003g00490.t01	77.2	2.5e-58	ENOG4111J9C	S	Function unknown	optic atrophy 3 (autosomal recessive, with chorea and spastic paraplegia)
TRINITY_DN17536_c0_g2	29760.VIT_18s0001g04680.t01	69.4	3.9e-116	ENOG410YBHG	S	Function unknown	NA
TRINITY_DN17537_c0_g5	39946.BGIOSGA033032-PA	100	1.2e-34	COG0464	O	Posttranslational modification, protein turnover, chaperones	Aaa atpase
TRINITY_DN17538_c0_g2	29760.VIT_00s0179g00360.t01	76	5.8e-37	ENOG4111S35	S	Function unknown	Plant-specific domain TIGR01615 family protein
TRINITY_DN17540_c0_g1	29760.VIT_05s0051g00930.t01	82	6.6e-218	COG2219	L	Replication, recombination and repair	DNA primase is the polymerase that synthesizes small RNA primers for the Okazaki fragments on both template strands at replication forks during chromosomal DNA synthesis (By similarity)
TRINITY_DN17541_c0_g1	4081.Solyc07g007800.2.1	71	2.1e-81	COG1272	S	Function unknown	Channel protein (Hemolysin III family
TRINITY_DN17541_c1_g1	29760.VIT_19s0090g00300.t01	45.5	7.1e-68	ENOG410YIVV	S	Function unknown	NA
TRINITY_DN17541_c1_g2	4113.PGSC0003DMT400057491	56.9	6.2e-23	ENOG410YIVV	S	Function unknown	NA
TRINITY_DN17541_c2_g1	4081.Solyc07g042880.1.1	77.5	5.6e-224	COG2124	Q	Secondary metabolites biosynthesis, transport and catabolism	Cytochrome p450
TRINITY_DN17541_c2_g2	4113.PGSC0003DMT400029692	62.6	1.2e-129	ENOG4111IHV	O	Posttranslational modification, protein turnover, chaperones	Ring finger protein
TRINITY_DN17542_c0_g1	29760.VIT_07s0005g02500.t01	53.9	3.3e-118	ENOG4110IXB	U	Intracellular trafficking, secretion, and vesicular transport	Charged multivesicular body protein
TRINITY_DN17543_c0_g3	240176.XP_002910572.1	89.1	1.4e-40	COG0474	P	Inorganic ion transport and metabolism	P-type atpase
TRINITY_DN17544_c0_g1	4113.PGSC0003DMT400052348	80.4	5.8e-51	COG4323	S	Function unknown	Membrane
TRINITY_DN17545_c0_g1	29760.VIT_05s0020g00790.t01	67.4	0	ENOG410XWK2	S	Function unknown	transposon protein
TRINITY_DN17546_c0_g1	3694.POPTR_0002s18380.1	72.9	1.3e-159	COG1409	S	Function unknown	Hydrolyzes cAMP to 5'-AMP. Plays an important regulatory role in modulating the intracellular concentration of cAMP, thereby influencing cAMP-dependent processes (By similarity)
TRINITY_DN17547_c0_g1	29760.VIT_01s0010g01670.t01	54.9	2.2e-74	ENOG4111VXN	K	Transcription	Forms a fork protection complex (FPC) with tof1 and which is required for chromosome segregation during meiosis and DNA damage repair. FPC coordinates leading and lagging strand synthesis and moves with the replication fork. FPC stabilizes replication forks in a configuration that is recognized by replication checkpoint sensors (By similarity)
TRINITY_DN17548_c0_g2	4113.PGSC0003DMT400061482	49.5	8.6e-17	COG5411	T	Signal transduction mechanisms	inositol
TRINITY_DN17548_c0_g3	29760.VIT_08s0040g02520.t01	64.7	3.4e-124	COG5411	T	Signal transduction mechanisms	inositol
TRINITY_DN17549_c0_g1	4113.PGSC0003DMT400013949	75.6	7.2e-140	ENOG410XPIJ	S	Function unknown	epimerase dehydratase
TRINITY_DN17549_c0_g2	4113.PGSC0003DMT400013949	72.4	3.9e-179	ENOG410XPIJ	S	Function unknown	epimerase dehydratase
TRINITY_DN1754_c0_g1	39946.BGIOSGA002291-PA	100	1.6e-33	COG1502	I	Lipid transport and metabolism	Catalyzes the reversible phosphatidyl group transfer from one phosphatidylglycerol molecule to another to form cardiolipin (CL) (diphosphatidylglycerol) and glycerol (By similarity)
TRINITY_DN17550_c0_g1	4081.Solyc06g063320.2.1	52.3	8.6e-28	ENOG410YXUS	S	Function unknown	NA
TRINITY_DN17551_c0_g1	10228.TriadP51202	62.5	5.9e-20	ENOG41123PQ	S	Function unknown	NA
TRINITY_DN17552_c0_g1	29760.VIT_07s0141g00220.t01	63.3	9.5e-51	ENOG410YBM7	K	Transcription	Transcription factor
TRINITY_DN17554_c0_g1	29760.VIT_07s0129g00210.t01	65.5	5.8e-137	ENOG410Z8TC	S	Function unknown	BTB POZ and TAZ domain-containing protein
TRINITY_DN17555_c0_g12	4558.Sb08g008672.1	35.7	7.7e-06	COG2801	L	Replication, recombination and repair	Retrotransposon protein
TRINITY_DN17557_c1_g2	29760.VIT_02s0025g03300.t01	75.2	3.8e-138	ENOG410XSWI	S	Function unknown	Potassium channel tetramerisation domain containing 3
TRINITY_DN17558_c0_g1	3694.POPTR_0011s11100.1	62.9	6.2e-221	ENOG410XR8Z	S	Function unknown	Peptide-N(4)-(N-acetyl-beta-glucosaminyl)asparagine amidase
TRINITY_DN17559_c1_g1	29760.VIT_08s0007g01710.t01	58.8	8e-25	ENOG410XQ6S	O	Posttranslational modification, protein turnover, chaperones	Cbl proto-oncogene, E3 ubiquitin protein ligase-like 1
TRINITY_DN17561_c3_g1	59689.scaffold_800742.1	68.8	9.5e-28	ENOG411299P	S	Function unknown	drought-induced protein 1
TRINITY_DN17562_c0_g2	4113.PGSC0003DMT400079931	81.8	3.9e-16	COG3525	G	Carbohydrate transport and metabolism	ec 3.2.1.52
TRINITY_DN17563_c0_g1	4081.Solyc09g091480.2.1	44.1	3.4e-88	ENOG41121N2	O	Posttranslational modification, protein turnover, chaperones	zinc ion binding
TRINITY_DN17564_c0_g2	4081.Solyc12g094450.1.1	70.2	4.2e-117	COG2030	I	Lipid transport and metabolism	maoc domain protein dehydratase
TRINITY_DN17564_c0_g8	3847.GLYMA03G14872.1	29.5	9.1e-06	NA	NA	NA	NA
TRINITY_DN17567_c1_g1	29760.VIT_16s0098g01130.t01	47	1.6e-20	ENOG410YFGR	S	Function unknown	NA
TRINITY_DN17567_c1_g2	29760.VIT_16s0098g01110.t01	44	1.1e-09	ENOG41128HA	K	Transcription	synovial sarcoma translocation gene on chromosome 18-like
TRINITY_DN17570_c0_g2	3694.POPTR_0008s02770.1	74	3.5e-155	COG0508	C	Energy production and conversion	Dehydrogenase
TRINITY_DN17572_c0_g1	29760.VIT_09s0002g03250.t01	87.5	3.1e-38	ENOG41126PD	O	Posttranslational modification, protein turnover, chaperones	Binds to actin and affects the structure of the cytoskeleton. At high concentrations, profilin prevents the polymerization of actin, whereas it enhances it at low concentrations (By
TRINITY_DN17574_c0_g2	29760.VIT_10s0116g00870.t01	67.5	7.7e-199	COG1593	G	Carbohydrate transport and metabolism	trap dicarboxylate transporter dctm subunit
TRINITY_DN17575_c0_g11	4081.Solyc01g099520.2.1	70.1	5.7e-32	ENOG410Z3VJ	S	Function unknown	Cell signaling peptide that may regulate plant stress, growth, and development. Mediates a rapid alkalinization of extracellular space by mediating a transient increase in the cytoplasmic Ca(2 ) concentration leading to a calcium-dependent signaling events through a cell surface receptor and a concomitant activation of some intracellular mitogen-activated protein kinases (By similarity)
TRINITY_DN17575_c0_g7	3694.POPTR_0014s12620.1	39.5	1.7e-19	ENOG41122JH	S	Function unknown	heat shock factor binding protein
TRINITY_DN17576_c0_g1	4081.Solyc06g008320.2.1	69.3	8.1e-52	ENOG410XPGP	T	Signal transduction mechanisms	Casein Kinase
TRINITY_DN17577_c0_g6	39947.LOC_Os03g22100.1	41.8	3.8e-15	COG2801	L	Replication, recombination and repair	Retrotransposon protein
TRINITY_DN17578_c1_g6	3694.POPTR_0004s19270.1	62	3.7e-27	COG2801	L	Replication, recombination and repair	Retrotransposon protein
TRINITY_DN17579_c0_g1	3847.GLYMA05G28790.1	98.6	2.9e-38	COG0639	T	Signal transduction mechanisms	serine threonine-protein phosphatase
TRINITY_DN17582_c0_g1	29760.VIT_18s0001g06640.t01	41.4	6.9e-56	ENOG41121N2	O	Posttranslational modification, protein turnover, chaperones	zinc ion binding
TRINITY_DN17583_c0_g1	3694.POPTR_0013s12910.1	66.2	1.3e-44	ENOG410YJEJ	S	Function unknown	Bacterial trigger factor protein (TF)
TRINITY_DN17585_c0_g1	7955.ENSDARP00000117864	100	1.1e-62	COG2163	J	Translation, ribosomal structure and biogenesis	(ribosomal) protein
TRINITY_DN17585_c0_g2	9685.ENSFCAP00000012189	100	1.4e-68	COG2163	J	Translation, ribosomal structure and biogenesis	(ribosomal) protein
TRINITY_DN17588_c0_g1	3694.POPTR_0010s19920.1	76.5	2.5e-129	ENOG410YF8M	S	Function unknown	reductase
TRINITY_DN17589_c1_g1	29760.VIT_06s0080g00160.t01	89.5	1.4e-131	ENOG410XRHN	O	Posttranslational modification, protein turnover, chaperones	endosome to lysosome transport via multivesicular body sorting pathway
TRINITY_DN17589_c1_g2	3847.GLYMA11G19120.1	91.7	1.1e-172	ENOG410XRHN	O	Posttranslational modification, protein turnover, chaperones	endosome to lysosome transport via multivesicular body sorting pathway
TRINITY_DN17590_c0_g1	4113.PGSC0003DMT400001066	71.8	3.8e-100	ENOG410YFST	S	Function unknown	osmotin-like protein
TRINITY_DN17591_c1_g1	3702.AT3G27460.1	75.6	3.8e-111	ENOG410XPFD	S	Function unknown	SAGA-associated factor 29
TRINITY_DN17592_c1_g5	29760.VIT_08s0007g03340.t01	89.9	3.4e-37	COG0081	J	Translation, ribosomal structure and biogenesis	Binds directly to 23S rRNA. The L1 stalk is quite mobile in the ribosome, and is involved in E site tRNA release (By similarity)
TRINITY_DN17594_c0_g1	29760.VIT_09s0002g03740.t01	80	4.9e-280	ENOG410XQ3R	K	Transcription	homeobox-leucine zipper protein
TRINITY_DN17595_c0_g1	29760.VIT_04s0023g02110.t01	46.1	5.3e-88	ENOG410XWA7	S	Function unknown	NA
TRINITY_DN17596_c3_g4	3694.POPTR_0001s33770.1	81	1.9e-53	COG0009	J	Translation, ribosomal structure and biogenesis	sua5 ycio yrdc ywlc family protein
TRINITY_DN17598_c1_g1	4081.Solyc04g049140.2.1	84.8	5.1e-65	ENOG410XTAA	S	Function unknown	lysine (K)-specific demethylase
TRINITY_DN17598_c2_g3	4113.PGSC0003DMT400022277	81.1	5e-49	ENOG410YFMK	S	Function unknown	NA
TRINITY_DN17600_c0_g1	7897.ENSLACP00000021269	99.3	9.2e-58	COG1308	K	Transcription	nascent polypeptide-associated complex
TRINITY_DN17602_c1_g1	3711.Bra020703.1-P	63.4	5.3e-20	ENOG410XPSH	U	Intracellular trafficking, secretion, and vesicular transport	Glutamate receptor, ionotropic
TRINITY_DN17602_c1_g3	29760.VIT_11s0052g01020.t01	51.1	1e-16	ENOG410XQQV	S	Function unknown	glutamate receptor
TRINITY_DN17602_c1_g4	29760.VIT_04s0069g00560.t01	49.3	1.4e-09	ENOG410Y6P1	U	Intracellular trafficking, secretion, and vesicular transport	Glutamate-gated receptor that probably acts as non- selective cation channel (By similarity)
TRINITY_DN17603_c1_g1	4081.Solyc03g097350.2.1	82.2	4e-90	ENOG410XPET	T	Signal transduction mechanisms	dual-specificity tyrosine-(Y)-phosphorylation regulated kinase
TRINITY_DN17603_c2_g1	4081.Solyc11g010510.1.1	75.9	9.9e-81	COG1739	S	Function unknown	protein family UPF0029, Impact, N-terminal protein
TRINITY_DN17604_c2_g4	29760.VIT_07s0141g00660.t01	84.5	4.5e-45	ENOG41123E8	U	Intracellular trafficking, secretion, and vesicular transport	negative regulation of translational elongation
TRINITY_DN17604_c2_g5	4081.Solyc05g010810.1.1	71.1	6e-06	ENOG410XP06	S	Function unknown	Phosphatidylinositol 4-kinase type
TRINITY_DN17604_c2_g7	4081.Solyc12g099820.1.1	83.5	7.4e-44	ENOG41123E8	U	Intracellular trafficking, secretion, and vesicular transport	negative regulation of translational elongation
TRINITY_DN17607_c0_g3	4113.PGSC0003DMT400077848	84.8	8.8e-208	COG5623	A	RNA processing and modification	Required for endonucleolytic cleavage during polyadenylation-dependent pre-mRNA 3'-end formation (By similarity)
TRINITY_DN17609_c0_g11	4081.Solyc03g120090.1.1	77.4	2.8e-125	COG0214	H	Coenzyme transport and metabolism	Involved in the production of pyridoxal phosphate, probably by incorporating ammonia into the pyridine ring (By similarity)
TRINITY_DN17609_c0_g5	3694.POPTR_0001s29700.1	87.3	3.2e-237	COG0750	M	Cell wall/membrane/envelope biogenesis	Membrane-associated zinc metalloprotease
TRINITY_DN17609_c0_g6	4081.Solyc03g120090.1.1	77.1	5.6e-131	COG0214	H	Coenzyme transport and metabolism	Involved in the production of pyridoxal phosphate, probably by incorporating ammonia into the pyridine ring (By similarity)
TRINITY_DN17609_c0_g9	4081.Solyc06g081980.1.1	89.3	6.9e-33	COG0214	H	Coenzyme transport and metabolism	Involved in the production of pyridoxal phosphate, probably by incorporating ammonia into the pyridine ring (By similarity)
TRINITY_DN17611_c0_g2	4081.Solyc06g083210.2.1	73	1.4e-181	ENOG410XPBB	T	Signal transduction mechanisms	Male germ cell-associated kinase
TRINITY_DN17612_c0_g2	4081.Solyc11g008260.1.1	80.2	4.5e-118	COG4870	O	Posttranslational modification, protein turnover, chaperones	cathepsin
TRINITY_DN17613_c1_g4	3694.POPTR_0006s13980.1	75.2	4.1e-81	COG1225	O	Posttranslational modification, protein turnover, chaperones	alkyl hydroperoxide reductase Thiol specific antioxidant Mal allergen
TRINITY_DN17614_c0_g1	54126.PPA13966	56.5	1.9e-14	ENOG4112BCC	S	Function unknown	C1q and tumor necrosis factor related protein
TRINITY_DN17615_c0_g2	29760.VIT_00s0253g00070.t01	83	5.1e-60	ENOG410XP6A	S	Function unknown	Chromosome 12 open reading frame 44
TRINITY_DN17615_c0_g8	29760.VIT_15s0048g01840.t01	61.6	4.7e-59	ENOG41121N2	O	Posttranslational modification, protein turnover, chaperones	zinc ion binding
TRINITY_DN17615_c0_g9	4081.Solyc09g083380.2.1	71.9	3.6e-26	ENOG410XYG5	S	Function unknown	histone h1
TRINITY_DN17616_c0_g3	29760.VIT_18s0001g12240.t01	97.4	8.3e-82	COG1503	J	Translation, ribosomal structure and biogenesis	Peptide Chain Release Factor
TRINITY_DN17616_c0_g5	4558.Sb01g010860.1	95.4	3.8e-241	COG1503	J	Translation, ribosomal structure and biogenesis	Peptide Chain Release Factor
TRINITY_DN17618_c0_g1	4081.Solyc09g075390.2.1	77	1.5e-281	COG0317	K	Transcription	In eubacteria ppGpp (guanosine 3'-diphosphate 5-' diphosphate) is a mediator of the stringent response that coordinates a variety of cellular activities in response to changes in nutritional abundance (By similarity)
TRINITY_DN17618_c0_g1	4081.Solyc09g075390.2.1	77	1.5e-281	COG0317	T	Signal transduction mechanisms	In eubacteria ppGpp (guanosine 3'-diphosphate 5-' diphosphate) is a mediator of the stringent response that coordinates a variety of cellular activities in response to changes in nutritional abundance (By similarity)
TRINITY_DN17618_c0_g2	29760.VIT_07s0005g00770.t01	69.7	1.9e-84	COG0317	K	Transcription	In eubacteria ppGpp (guanosine 3'-diphosphate 5-' diphosphate) is a mediator of the stringent response that coordinates a variety of cellular activities in response to changes in nutritional abundance (By similarity)
TRINITY_DN17618_c0_g2	29760.VIT_07s0005g00770.t01	69.7	1.9e-84	COG0317	T	Signal transduction mechanisms	In eubacteria ppGpp (guanosine 3'-diphosphate 5-' diphosphate) is a mediator of the stringent response that coordinates a variety of cellular activities in response to changes in nutritional abundance (By similarity)
TRINITY_DN17619_c0_g3	29760.VIT_00s0357g00100.t01	65.5	3e-36	ENOG410YRT5	S	Function unknown	Pollen-specific protein
TRINITY_DN17619_c0_g4	3694.POPTR_0001s35660.1	90.6	4.2e-50	ENOG410XPC8	S	Function unknown	copine family
TRINITY_DN17620_c0_g2	29760.VIT_12s0059g00170.t01	69.1	2.6e-57	COG0456	S	Function unknown	acetyltransferase
TRINITY_DN17624_c1_g2	4113.PGSC0003DMT400075349	90.5	1.3e-157	ENOG410XPP3	T	Signal transduction mechanisms	Cyclin-Dependent Kinase
TRINITY_DN17624_c1_g4	4081.Solyc12g095860.1.1	87.8	3.7e-154	ENOG410XPP3	T	Signal transduction mechanisms	Cyclin-Dependent Kinase
TRINITY_DN17627_c1_g1	29760.VIT_08s0105g00360.t01	81.4	1.1e-13	ENOG410YG6P	S	Function unknown	Finger protein
TRINITY_DN17627_c1_g2	29760.VIT_08s0105g00360.t01	85.2	2.9e-87	ENOG410YG6P	S	Function unknown	Finger protein
[truncated: 20,211 more rows]
