# Supplementary material for: Drought Stress Stimulates the Terpenoid Backbone and Triterpenoid Biosynthesis Pathway to Promote the Synthesis of Saikosaponin in Bupleurum chinense DC. Roots
Source: Molecules. 2022 Aug 25;27(17):5470. doi: 10.3390/molecules27175470 (PMC9457724; doi:10.3390/molecules27175470)
Supplement: Supplementary file 1 [file molecules-27-05470-s001.zip › Supplementary Material. Table S3. GO_annotation.xlsx]

## Sheet: Sheet1
Query	GO_hit	GO_identity	GO_evalue	Gene	Symbol	GO_ID	GO_Term	GO_Function	GO_Level
TRINITY_DN10009_c0_g1	UNIPROTKB|D7TJ45	84.8	1.1e-23	100254522	VIT_08s0007g03620	GO:0002181	cytoplasmic translation	biological_process	9
TRINITY_DN10009_c0_g1	UNIPROTKB|D7TJ45	84.8	1.1e-23	100254522	VIT_08s0007g03620	GO:0003735	structural constituent of ribosome	molecular_function	4
TRINITY_DN10009_c0_g1	UNIPROTKB|D7TJ45	84.8	1.1e-23	100254522	VIT_08s0007g03620	GO:0022625	cytosolic large ribosomal subunit	cellular_component	8
TRINITY_DN10009_c0_g1	UNIPROTKB|D7TJ45	84.8	1.1e-23	100254522	VIT_08s0007g03620	GO:0030687	preribosome, large subunit precursor	cellular_component	6
TRINITY_DN10009_c0_g1	UNIPROTKB|D7TJ45	84.8	1.1e-23	100254522	VIT_08s0007g03620	GO:0070180	large ribosomal subunit rRNA binding	molecular_function	8
TRINITY_DN1000_c0_g1	TAIR|locus:2165001	86.7	2.4e-24	835769	SYNC1	GO:0003677	DNA binding	molecular_function	6
TRINITY_DN1000_c0_g1	TAIR|locus:2165001	86.7	2.4e-24	835769	SYNC1	GO:0004816	asparagine-tRNA ligase activity	molecular_function	7
TRINITY_DN1000_c0_g1	TAIR|locus:2165001	86.7	2.4e-24	835769	SYNC1	GO:0005524	ATP binding	molecular_function	5
TRINITY_DN1000_c0_g1	TAIR|locus:2165001	86.7	2.4e-24	835769	SYNC1	GO:0005737	cytoplasm	cellular_component	5
TRINITY_DN1000_c0_g1	TAIR|locus:2165001	86.7	2.4e-24	835769	SYNC1	GO:0005739	mitochondrion	cellular_component	6
TRINITY_DN1000_c0_g1	TAIR|locus:2165001	86.7	2.4e-24	835769	SYNC1	GO:0005829	cytosol	cellular_component	6
TRINITY_DN1000_c0_g1	TAIR|locus:2165001	86.7	2.4e-24	835769	SYNC1	GO:0006421	asparaginyl-tRNA aminoacylation	biological_process	13
TRINITY_DN1000_c0_g1	TAIR|locus:2165001	86.7	2.4e-24	835769	SYNC1	GO:0009507	chloroplast	cellular_component	7
TRINITY_DN1000_c0_g1	TAIR|locus:2165001	86.7	2.4e-24	835769	SYNC1	GO:0009793	embryo development ending in seed dormancy	biological_process	5
TRINITY_DN1000_c0_g1	TAIR|locus:2165001	86.7	2.4e-24	835769	SYNC1	GO:0046686	response to cadmium ion	biological_process	7
TRINITY_DN10012_c0_g1	UNIPROTKB|B9H6Y0	62.9	2.2e-20	7486562	POPTR_0005s17580g	GO:0000822	inositol hexakisphosphate binding	molecular_function	5
TRINITY_DN10012_c0_g1	UNIPROTKB|B9H6Y0	62.9	2.2e-20	7486562	POPTR_0005s17580g	GO:0009734	auxin-activated signaling pathway	biological_process	6
TRINITY_DN10015_c0_g1	UNIPROTKB|Q43715	74.2	1.1e-37	-	TOC75	GO:0005515	protein binding	molecular_function	4
TRINITY_DN10037_c0_g1	TAIR|locus:2179008	81.6	2.3e-36	832241	AGO9	GO:0005634	nucleus	cellular_component	6
TRINITY_DN10037_c0_g1	TAIR|locus:2179008	81.6	2.3e-36	832241	AGO9	GO:0005737	cytoplasm	cellular_component	5
TRINITY_DN10037_c0_g1	TAIR|locus:2179008	81.6	2.3e-36	832241	AGO9	GO:0009554	megasporogenesis	biological_process	7
TRINITY_DN10037_c0_g1	TAIR|locus:2179008	81.6	2.3e-36	832241	AGO9	GO:0010529	negative regulation of transposition	biological_process	7
TRINITY_DN10037_c0_g1	TAIR|locus:2179008	81.6	2.3e-36	832241	AGO9	GO:0035197	siRNA binding	molecular_function	8
TRINITY_DN10037_c0_g1	TAIR|locus:2179008	81.6	2.3e-36	832241	AGO9	GO:0048481	plant ovule development	biological_process	5
TRINITY_DN10037_c0_g1	TAIR|locus:2179008	81.6	2.3e-36	832241	AGO9	GO:0051607	defense response to virus	biological_process	5
TRINITY_DN10037_c0_g1	TAIR|locus:2179008	81.6	2.3e-36	832241	AGO9	GO:1904159	megasporocyte differentiation	biological_process	7
TRINITY_DN10053_c0_g1	ZFIN|ZDB-GENE-040426-2592	100	5.9e-12	406619	nnt	GO:0005743	mitochondrial inner membrane	cellular_component	6
TRINITY_DN10053_c0_g1	ZFIN|ZDB-GENE-040426-2592	100	5.9e-12	406619	nnt	GO:0006740	NADPH regeneration	biological_process	6
TRINITY_DN10053_c0_g1	ZFIN|ZDB-GENE-040426-2592	100	5.9e-12	406619	nnt	GO:0008746	NAD(P)+ transhydrogenase activity	molecular_function	7
TRINITY_DN10053_c0_g1	ZFIN|ZDB-GENE-040426-2592	100	5.9e-12	406619	nnt	GO:0008750	NAD(P)+ transhydrogenase (AB-specific) activity	molecular_function	8
TRINITY_DN10053_c0_g1	ZFIN|ZDB-GENE-040426-2592	100	5.9e-12	406619	nnt	GO:0016020	membrane	cellular_component	3
TRINITY_DN10053_c0_g1	ZFIN|ZDB-GENE-040426-2592	100	5.9e-12	406619	nnt	GO:0016021	integral component of membrane	cellular_component	5
TRINITY_DN10053_c0_g1	ZFIN|ZDB-GENE-040426-2592	100	5.9e-12	406619	nnt	GO:0016491	oxidoreductase activity	molecular_function	4
TRINITY_DN10053_c0_g1	ZFIN|ZDB-GENE-040426-2592	100	5.9e-12	406619	nnt	GO:0050661	NADP binding	molecular_function	6
TRINITY_DN10053_c0_g1	ZFIN|ZDB-GENE-040426-2592	100	5.9e-12	406619	nnt	GO:0051287	NAD binding	molecular_function	6
TRINITY_DN10053_c0_g1	ZFIN|ZDB-GENE-040426-2592	100	5.9e-12	406619	nnt	GO:0055114	oxidation-reduction process	biological_process	4
TRINITY_DN10055_c0_g1	UNIPROTKB|Q4PM21	82.9	1.8e-28	8026412	IscW_ISCW017347	GO:0003735	structural constituent of ribosome	molecular_function	4
TRINITY_DN10055_c0_g1	UNIPROTKB|Q4PM21	82.9	1.8e-28	8026412	IscW_ISCW017347	GO:0006412	translation	biological_process	8
TRINITY_DN10055_c0_g1	UNIPROTKB|Q4PM21	82.9	1.8e-28	8026412	IscW_ISCW017347	GO:0022625	cytosolic large ribosomal subunit	cellular_component	8
TRINITY_DN1007_c0_g1	TAIR|locus:2046743	69.3	1.7e-158	816886	AT2G23540	GO:0005576	extracellular region	cellular_component	3
TRINITY_DN1007_c0_g1	TAIR|locus:2046743	69.3	1.7e-158	816886	AT2G23540	GO:0016042	lipid catabolic process	biological_process	6
TRINITY_DN1007_c0_g1	TAIR|locus:2046743	69.3	1.7e-158	816886	AT2G23540	GO:0016788	hydrolase activity, acting on ester bonds	molecular_function	5
TRINITY_DN1007_c0_g1	TAIR|locus:2046743	69.3	1.7e-158	816886	AT2G23540	GO:0052689	carboxylic ester hydrolase activity	molecular_function	6
TRINITY_DN10111_c0_g1	UNIPROTKB|H2TPF2	68.2	1.6e-38	-	H2TPF2	GO:0005739	mitochondrion	cellular_component	6
TRINITY_DN10134_c0_g1	TAIR|locus:505006219	67.7	3.8e-17	843651	BNS	GO:0003674	molecular_function	molecular_function	2
TRINITY_DN10134_c0_g1	TAIR|locus:505006219	67.7	3.8e-17	843651	BNS	GO:0005634	nucleus	cellular_component	6
TRINITY_DN10134_c0_g1	TAIR|locus:505006219	67.7	3.8e-17	843651	BNS	GO:0005680	anaphase-promoting complex	cellular_component	7
TRINITY_DN10134_c0_g1	TAIR|locus:505006219	67.7	3.8e-17	843651	BNS	GO:0007049	cell cycle	biological_process	4
TRINITY_DN10134_c0_g1	TAIR|locus:505006219	67.7	3.8e-17	843651	BNS	GO:0010152	pollen maturation	biological_process	5
TRINITY_DN10134_c0_g1	TAIR|locus:505006219	67.7	3.8e-17	843651	BNS	GO:0010229	inflorescence development	biological_process	6
TRINITY_DN10134_c0_g1	TAIR|locus:505006219	67.7	3.8e-17	843651	BNS	GO:0016567	protein ubiquitination	biological_process	11
TRINITY_DN10134_c0_g1	TAIR|locus:505006219	67.7	3.8e-17	843651	BNS	GO:0048827	phyllome development	biological_process	6
TRINITY_DN10134_c0_g1	TAIR|locus:505006219	67.7	3.8e-17	843651	BNS	GO:0051301	cell division	biological_process	4
TRINITY_DN10134_c0_g1	TAIR|locus:505006219	67.7	3.8e-17	843651	BNS	GO:0061614	pri-miRNA transcription by RNA polymerase II	biological_process	10
TRINITY_DN10140_c0_g1	UNIPROTKB|I1M826	100	6.9e-32	100816150	GLYMA_14G065600	GO:0004350	glutamate-5-semialdehyde dehydrogenase activity	molecular_function	7
TRINITY_DN10140_c0_g1	UNIPROTKB|I1M826	100	6.9e-32	100816150	GLYMA_14G065600	GO:0005737	cytoplasm	cellular_component	5
TRINITY_DN10140_c0_g1	UNIPROTKB|I1M826	100	6.9e-32	100816150	GLYMA_14G065600	GO:0006561	proline biosynthetic process	biological_process	12
TRINITY_DN10146_c0_g1	UNIPROTKB|F6HFT6	67	8.1e-33	-	VIT_01s0011g01270	GO:0005789	endoplasmic reticulum membrane	cellular_component	5
TRINITY_DN10146_c0_g1	UNIPROTKB|F6HFT6	67	8.1e-33	-	VIT_01s0011g01270	GO:0070072	vacuolar proton-transporting V-type ATPase complex assembly	biological_process	10
TRINITY_DN10158_c0_g1	UNIPROTKB|Q0JH25	98.8	4.3e-41	-	Os01g0888500	GO:0004642	phosphoribosylformylglycinamidine synthase activity	molecular_function	7
TRINITY_DN10158_c0_g1	UNIPROTKB|Q0JH25	98.8	4.3e-41	-	Os01g0888500	GO:0005524	ATP binding	molecular_function	5
TRINITY_DN10158_c0_g1	UNIPROTKB|Q0JH25	98.8	4.3e-41	-	Os01g0888500	GO:0005737	cytoplasm	cellular_component	5
TRINITY_DN10158_c0_g1	UNIPROTKB|Q0JH25	98.8	4.3e-41	-	Os01g0888500	GO:0006164	purine nucleotide biosynthetic process	biological_process	10
TRINITY_DN10158_c0_g1	UNIPROTKB|Q0JH25	98.8	4.3e-41	-	Os01g0888500	GO:0006541	glutamine metabolic process	biological_process	11
TRINITY_DN10158_c0_g1	UNIPROTKB|Q0JH25	98.8	4.3e-41	-	Os01g0888500	GO:0009156	ribonucleoside monophosphate biosynthetic process	biological_process	10
TRINITY_DN10165_c0_g1	UNIPROTKB|C6SYQ7	100	3e-24	100499965	GLYMA_20G084000	GO:0000398	mRNA splicing, via spliceosome	biological_process	13
TRINITY_DN10165_c0_g1	UNIPROTKB|C6SYQ7	100	3e-24	100499965	GLYMA_20G084000	GO:0003723	RNA binding	molecular_function	6
TRINITY_DN10165_c0_g1	UNIPROTKB|C6SYQ7	100	3e-24	100499965	GLYMA_20G084000	GO:0005685	U1 snRNP	cellular_component	8
TRINITY_DN10165_c0_g1	UNIPROTKB|C6SYQ7	100	3e-24	100499965	GLYMA_20G084000	GO:0071013	catalytic step 2 spliceosome	cellular_component	7
TRINITY_DN10165_c0_g2	UNIPROTKB|F1P4B8	100	1.4e-36	417916	SNRPF	GO:0000387	spliceosomal snRNP assembly	biological_process	9
TRINITY_DN10165_c0_g2	UNIPROTKB|F1P4B8	100	1.4e-36	417916	SNRPF	GO:0000398	mRNA splicing, via spliceosome	biological_process	13
TRINITY_DN10165_c0_g2	UNIPROTKB|F1P4B8	100	1.4e-36	417916	SNRPF	GO:0003723	RNA binding	molecular_function	6
TRINITY_DN10165_c0_g2	UNIPROTKB|F1P4B8	100	1.4e-36	417916	SNRPF	GO:0005683	U7 snRNP	cellular_component	7
TRINITY_DN10165_c0_g2	UNIPROTKB|F1P4B8	100	1.4e-36	417916	SNRPF	GO:0005685	U1 snRNP	cellular_component	8
TRINITY_DN10165_c0_g2	UNIPROTKB|F1P4B8	100	1.4e-36	417916	SNRPF	GO:0005687	U4 snRNP	cellular_component	8
TRINITY_DN10165_c0_g2	UNIPROTKB|F1P4B8	100	1.4e-36	417916	SNRPF	GO:0005689	U12-type spliceosomal complex	cellular_component	7
TRINITY_DN10165_c0_g2	UNIPROTKB|F1P4B8	100	1.4e-36	417916	SNRPF	GO:0005829	cytosol	cellular_component	6
TRINITY_DN10165_c0_g2	UNIPROTKB|F1P4B8	100	1.4e-36	417916	SNRPF	GO:0034709	methylosome	cellular_component	6
TRINITY_DN10165_c0_g2	UNIPROTKB|F1P4B8	100	1.4e-36	417916	SNRPF	GO:0034715	pICln-Sm protein complex	cellular_component	6
TRINITY_DN10165_c0_g2	UNIPROTKB|F1P4B8	100	1.4e-36	417916	SNRPF	GO:0034719	SMN-Sm protein complex	cellular_component	6
TRINITY_DN10165_c0_g2	UNIPROTKB|F1P4B8	100	1.4e-36	417916	SNRPF	GO:0071013	catalytic step 2 spliceosome	cellular_component	7
TRINITY_DN10165_c0_g2	UNIPROTKB|F1P4B8	100	1.4e-36	417916	SNRPF	GO:0098779	positive regulation of mitophagy in response to mitochondrial depolarization	biological_process	12
TRINITY_DN10169_c0_g1	TAIR|locus:2165512	71.8	3.5e-23	834290	PAF1	GO:0000502	proteasome complex	cellular_component	5
TRINITY_DN10169_c0_g1	TAIR|locus:2165512	71.8	3.5e-23	834290	PAF1	GO:0004175	endopeptidase activity	molecular_function	7
TRINITY_DN10169_c0_g1	TAIR|locus:2165512	71.8	3.5e-23	834290	PAF1	GO:0004298	threonine-type endopeptidase activity	molecular_function	8
TRINITY_DN10169_c0_g1	TAIR|locus:2165512	71.8	3.5e-23	834290	PAF1	GO:0005634	nucleus	cellular_component	6
TRINITY_DN10169_c0_g1	TAIR|locus:2165512	71.8	3.5e-23	834290	PAF1	GO:0005737	cytoplasm	cellular_component	5
TRINITY_DN10169_c0_g1	TAIR|locus:2165512	71.8	3.5e-23	834290	PAF1	GO:0005829	cytosol	cellular_component	6
TRINITY_DN10169_c0_g1	TAIR|locus:2165512	71.8	3.5e-23	834290	PAF1	GO:0005839	proteasome core complex	cellular_component	4
TRINITY_DN10169_c0_g1	TAIR|locus:2165512	71.8	3.5e-23	834290	PAF1	GO:0005886	plasma membrane	cellular_component	4
TRINITY_DN10169_c0_g1	TAIR|locus:2165512	71.8	3.5e-23	834290	PAF1	GO:0006511	ubiquitin-dependent protein catabolic process	biological_process	10
TRINITY_DN10169_c0_g1	TAIR|locus:2165512	71.8	3.5e-23	834290	PAF1	GO:0008233	peptidase activity	molecular_function	5
TRINITY_DN10169_c0_g1	TAIR|locus:2165512	71.8	3.5e-23	834290	PAF1	GO:0030163	protein catabolic process	biological_process	7
TRINITY_DN10169_c0_g1	TAIR|locus:2165512	71.8	3.5e-23	834290	PAF1	GO:0043161	proteasome-mediated ubiquitin-dependent protein catabolic process	biological_process	11
TRINITY_DN10169_c0_g1	TAIR|locus:2165512	71.8	3.5e-23	834290	PAF1	GO:0046685	response to arsenic-containing substance	biological_process	5
TRINITY_DN10174_c0_g1	TAIR|locus:2206179	76.3	7.8e-29	840032	FEI1	GO:0004674	protein serine/threonine kinase activity	molecular_function	8
TRINITY_DN10174_c0_g1	TAIR|locus:2206179	76.3	7.8e-29	840032	FEI1	GO:0005524	ATP binding	molecular_function	5
TRINITY_DN10174_c0_g1	TAIR|locus:2206179	76.3	7.8e-29	840032	FEI1	GO:0005886	plasma membrane	cellular_component	4
TRINITY_DN10174_c0_g1	TAIR|locus:2206179	76.3	7.8e-29	840032	FEI1	GO:0006468	protein phosphorylation	biological_process	9
TRINITY_DN10174_c0_g1	TAIR|locus:2206179	76.3	7.8e-29	840032	FEI1	GO:0007169	transmembrane receptor protein tyrosine kinase signaling pathway	biological_process	7
TRINITY_DN10174_c0_g1	TAIR|locus:2206179	76.3	7.8e-29	840032	FEI1	GO:0009664	plant-type cell wall organization	biological_process	7
TRINITY_DN10174_c0_g1	TAIR|locus:2206179	76.3	7.8e-29	840032	FEI1	GO:0009826	unidimensional cell growth	biological_process	7
TRINITY_DN10174_c0_g1	TAIR|locus:2206179	76.3	7.8e-29	840032	FEI1	GO:0016021	integral component of membrane	cellular_component	5
TRINITY_DN10174_c0_g1	TAIR|locus:2206179	76.3	7.8e-29	840032	FEI1	GO:0016301	kinase activity	molecular_function	6
TRINITY_DN10174_c0_g1	TAIR|locus:2206179	76.3	7.8e-29	840032	FEI1	GO:0016310	phosphorylation	biological_process	7
TRINITY_DN10174_c0_g1	TAIR|locus:2206179	76.3	7.8e-29	840032	FEI1	GO:0030244	cellulose biosynthetic process	biological_process	11
TRINITY_DN10180_c0_g1	TAIR|locus:2197940	75.8	8.2e-22	839189	GRF12	GO:0005634	nucleus	cellular_component	6
TRINITY_DN10180_c0_g1	TAIR|locus:2197940	75.8	8.2e-22	839189	GRF12	GO:0005737	cytoplasm	cellular_component	5
TRINITY_DN10180_c0_g1	TAIR|locus:2197940	75.8	8.2e-22	839189	GRF12	GO:0019904	protein domain specific binding	molecular_function	5
TRINITY_DN10180_c0_g1	TAIR|locus:2197940	75.8	8.2e-22	839189	GRF12	GO:0045309	protein phosphorylated amino acid binding	molecular_function	6
TRINITY_DN10184_c0_g1	UNIPROTKB|Q95M18	100	4.8e-15	282646	HSP90B1	GO:0001666	response to hypoxia	biological_process	5
TRINITY_DN10184_c0_g1	UNIPROTKB|Q95M18	100	4.8e-15	282646	HSP90B1	GO:0003723	RNA binding	molecular_function	6
TRINITY_DN10184_c0_g1	UNIPROTKB|Q95M18	100	4.8e-15	282646	HSP90B1	GO:0005524	ATP binding	molecular_function	5
TRINITY_DN10184_c0_g1	UNIPROTKB|Q95M18	100	4.8e-15	282646	HSP90B1	GO:0005634	nucleus	cellular_component	6
TRINITY_DN10184_c0_g1	UNIPROTKB|Q95M18	100	4.8e-15	282646	HSP90B1	GO:0005783	endoplasmic reticulum	cellular_component	6
TRINITY_DN10184_c0_g1	UNIPROTKB|Q95M18	100	4.8e-15	282646	HSP90B1	GO:0005788	endoplasmic reticulum lumen	cellular_component	7
TRINITY_DN10184_c0_g1	UNIPROTKB|Q95M18	100	4.8e-15	282646	HSP90B1	GO:0005789	endoplasmic reticulum membrane	cellular_component	5
TRINITY_DN10184_c0_g1	UNIPROTKB|Q95M18	100	4.8e-15	282646	HSP90B1	GO:0005829	cytosol	cellular_component	6
TRINITY_DN10184_c0_g1	UNIPROTKB|Q95M18	100	4.8e-15	282646	HSP90B1	GO:0005886	plasma membrane	cellular_component	4
TRINITY_DN10184_c0_g1	UNIPROTKB|Q95M18	100	4.8e-15	282646	HSP90B1	GO:0005925	focal adhesion	cellular_component	7
TRINITY_DN10184_c0_g1	UNIPROTKB|Q95M18	100	4.8e-15	282646	HSP90B1	GO:0006457	protein folding	biological_process	4
TRINITY_DN10184_c0_g1	UNIPROTKB|Q95M18	100	4.8e-15	282646	HSP90B1	GO:0019903	protein phosphatase binding	molecular_function	7
TRINITY_DN10184_c0_g1	UNIPROTKB|Q95M18	100	4.8e-15	282646	HSP90B1	GO:0030433	ubiquitin-dependent ERAD pathway	biological_process	8
TRINITY_DN10184_c0_g1	UNIPROTKB|Q95M18	100	4.8e-15	282646	HSP90B1	GO:0030496	midbody	cellular_component	4
TRINITY_DN10184_c0_g1	UNIPROTKB|Q95M18	100	4.8e-15	282646	HSP90B1	GO:0030970	retrograde protein transport, ER to cytosol	biological_process	12
TRINITY_DN10184_c0_g1	UNIPROTKB|Q95M18	100	4.8e-15	282646	HSP90B1	GO:0031012	extracellular matrix	cellular_component	4
TRINITY_DN10184_c0_g1	UNIPROTKB|Q95M18	100	4.8e-15	282646	HSP90B1	GO:0031247	actin rod assembly	biological_process	7
TRINITY_DN10184_c0_g1	UNIPROTKB|Q95M18	100	4.8e-15	282646	HSP90B1	GO:0034663	endoplasmic reticulum chaperone complex	cellular_component	4
TRINITY_DN10184_c0_g1	UNIPROTKB|Q95M18	100	4.8e-15	282646	HSP90B1	GO:0042470	melanosome	cellular_component	8
TRINITY_DN10184_c0_g1	UNIPROTKB|Q95M18	100	4.8e-15	282646	HSP90B1	GO:0043066	negative regulation of apoptotic process	biological_process	9
TRINITY_DN10184_c0_g1	UNIPROTKB|Q95M18	100	4.8e-15	282646	HSP90B1	GO:0043666	regulation of phosphoprotein phosphatase activity	biological_process	11
TRINITY_DN10184_c0_g1	UNIPROTKB|Q95M18	100	4.8e-15	282646	HSP90B1	GO:0046790	virion binding	molecular_function	4
TRINITY_DN10184_c0_g1	UNIPROTKB|Q95M18	100	4.8e-15	282646	HSP90B1	GO:0048471	perinuclear region of cytoplasm	cellular_component	6
TRINITY_DN10184_c0_g1	UNIPROTKB|Q95M18	100	4.8e-15	282646	HSP90B1	GO:0050750	low-density lipoprotein particle receptor binding	molecular_function	7
TRINITY_DN10184_c0_g1	UNIPROTKB|Q95M18	100	4.8e-15	282646	HSP90B1	GO:0051082	unfolded protein binding	molecular_function	5
TRINITY_DN10184_c0_g1	UNIPROTKB|Q95M18	100	4.8e-15	282646	HSP90B1	GO:0070062	extracellular exosome	cellular_component	7
TRINITY_DN10184_c0_g1	UNIPROTKB|Q95M18	100	4.8e-15	282646	HSP90B1	GO:0071318	cellular response to ATP	biological_process	9
TRINITY_DN10188_c0_g1	UNIPROTKB|A1Z651	39.1	3.9e-06	-	gag-pol	GO:0042802	identical protein binding	molecular_function	5
TRINITY_DN10189_c0_g2	UNIPROTKB|Q6L4S0	100	7e-35	4339794	Os05g0592400	GO:0003684	damaged DNA binding	molecular_function	7
TRINITY_DN10189_c0_g2	UNIPROTKB|Q6L4S0	100	7e-35	4339794	Os05g0592400	GO:0005634	nucleus	cellular_component	6
TRINITY_DN10189_c0_g2	UNIPROTKB|Q6L4S0	100	7e-35	4339794	Os05g0592400	GO:0006289	nucleotide-excision repair	biological_process	9
TRINITY_DN10189_c0_g2	UNIPROTKB|Q6L4S0	100	7e-35	4339794	Os05g0592400	GO:0031461	cullin-RING ubiquitin ligase complex	cellular_component	6
TRINITY_DN10189_c0_g2	UNIPROTKB|Q6L4S0	100	7e-35	4339794	Os05g0592400	GO:0043161	proteasome-mediated ubiquitin-dependent protein catabolic process	biological_process	11
TRINITY_DN1018_c0_g1	UNIPROTKB|E1BSY6	100	2.7e-33	770704	POLR2L	GO:0001054	RNA polymerase I activity	molecular_function	10
TRINITY_DN1018_c0_g1	UNIPROTKB|E1BSY6	100	2.7e-33	770704	POLR2L	GO:0001055	RNA polymerase II activity	molecular_function	10
TRINITY_DN1018_c0_g1	UNIPROTKB|E1BSY6	100	2.7e-33	770704	POLR2L	GO:0001056	RNA polymerase III activity	molecular_function	10
TRINITY_DN1018_c0_g1	UNIPROTKB|E1BSY6	100	2.7e-33	770704	POLR2L	GO:0003677	DNA binding	molecular_function	6
TRINITY_DN1018_c0_g1	UNIPROTKB|E1BSY6	100	2.7e-33	770704	POLR2L	GO:0005665	DNA-directed RNA polymerase II, core complex	cellular_component	7
TRINITY_DN1018_c0_g1	UNIPROTKB|E1BSY6	100	2.7e-33	770704	POLR2L	GO:0005666	DNA-directed RNA polymerase III complex	cellular_component	8
TRINITY_DN1018_c0_g1	UNIPROTKB|E1BSY6	100	2.7e-33	770704	POLR2L	GO:0005736	DNA-directed RNA polymerase I complex	cellular_component	7
TRINITY_DN1018_c0_g1	UNIPROTKB|E1BSY6	100	2.7e-33	770704	POLR2L	GO:0006360	transcription by RNA polymerase I	biological_process	9
TRINITY_DN1018_c0_g1	UNIPROTKB|E1BSY6	100	2.7e-33	770704	POLR2L	GO:0006366	transcription by RNA polymerase II	biological_process	9
TRINITY_DN1018_c0_g1	UNIPROTKB|E1BSY6	100	2.7e-33	770704	POLR2L	GO:0006383	transcription by RNA polymerase III	biological_process	9
TRINITY_DN1018_c0_g1	UNIPROTKB|E1BSY6	100	2.7e-33	770704	POLR2L	GO:0008270	zinc ion binding	molecular_function	8
TRINITY_DN10196_c0_g1	TAIR|locus:2014000	44.9	3.5e-15	843420	MLP28	GO:0003674	molecular_function	molecular_function	2
TRINITY_DN10196_c0_g1	TAIR|locus:2014000	44.9	3.5e-15	843420	MLP28	GO:0005634	nucleus	cellular_component	6
TRINITY_DN10196_c0_g1	TAIR|locus:2014000	44.9	3.5e-15	843420	MLP28	GO:0005737	cytoplasm	cellular_component	5
TRINITY_DN10196_c0_g1	TAIR|locus:2014000	44.9	3.5e-15	843420	MLP28	GO:0006952	defense response	biological_process	5
TRINITY_DN10196_c0_g1	TAIR|locus:2014000	44.9	3.5e-15	843420	MLP28	GO:0009507	chloroplast	cellular_component	7
TRINITY_DN10196_c0_g1	TAIR|locus:2014000	44.9	3.5e-15	843420	MLP28	GO:0009607	response to biotic stimulus	biological_process	4
TRINITY_DN10212_c0_g1	TAIR|locus:2012227	54.5	2.2e-10	841390	CXE5	GO:0005634	nucleus	cellular_component	6
TRINITY_DN10212_c0_g1	TAIR|locus:2012227	54.5	2.2e-10	841390	CXE5	GO:0009056	catabolic process	biological_process	4
TRINITY_DN10212_c0_g1	TAIR|locus:2012227	54.5	2.2e-10	841390	CXE5	GO:0052689	carboxylic ester hydrolase activity	molecular_function	6
TRINITY_DN1021_c0_g1	UNIPROTKB|P56381	100	1.1e-20	514	ATP5E	GO:0000275	mitochondrial proton-transporting ATP synthase complex, catalytic core F(1)	cellular_component	7
TRINITY_DN1021_c0_g1	UNIPROTKB|P56381	100	1.1e-20	514	ATP5E	GO:0005753	mitochondrial proton-transporting ATP synthase complex	cellular_component	7
TRINITY_DN1021_c0_g1	UNIPROTKB|P56381	100	1.1e-20	514	ATP5E	GO:0005759	mitochondrial matrix	cellular_component	7
TRINITY_DN1021_c0_g1	UNIPROTKB|P56381	100	1.1e-20	514	ATP5E	GO:0006754	ATP biosynthetic process	biological_process	12
TRINITY_DN1021_c0_g1	UNIPROTKB|P56381	100	1.1e-20	514	ATP5E	GO:0016887	ATPase activity	molecular_function	9
TRINITY_DN1021_c0_g1	UNIPROTKB|P56381	100	1.1e-20	514	ATP5E	GO:0022857	transmembrane transporter activity	molecular_function	4
TRINITY_DN1021_c0_g1	UNIPROTKB|P56381	100	1.1e-20	514	ATP5E	GO:0042407	cristae formation	biological_process	9
TRINITY_DN1021_c0_g1	UNIPROTKB|P56381	100	1.1e-20	514	ATP5E	GO:0042776	mitochondrial ATP synthesis coupled proton transport	biological_process	7
TRINITY_DN1021_c0_g1	UNIPROTKB|P56381	100	1.1e-20	514	ATP5E	GO:0046933	proton-transporting ATP synthase activity, rotational mechanism	molecular_function	10
TRINITY_DN1021_c0_g1	UNIPROTKB|P56381	100	1.1e-20	514	ATP5E	GO:0046961	proton-transporting ATPase activity, rotational mechanism	molecular_function	10
TRINITY_DN10236_c0_g1	TAIR|locus:2081036	68.4	2e-24	819809	MEE32	GO:0003855	3-dehydroquinate dehydratase activity	molecular_function	7
TRINITY_DN10236_c0_g1	TAIR|locus:2081036	68.4	2e-24	819809	MEE32	GO:0004764	shikimate 3-dehydrogenase (NADP+) activity	molecular_function	7
TRINITY_DN10236_c0_g1	TAIR|locus:2081036	68.4	2e-24	819809	MEE32	GO:0005829	cytosol	cellular_component	6
TRINITY_DN10236_c0_g1	TAIR|locus:2081036	68.4	2e-24	819809	MEE32	GO:0009073	aromatic amino acid family biosynthetic process	biological_process	10
TRINITY_DN10236_c0_g1	TAIR|locus:2081036	68.4	2e-24	819809	MEE32	GO:0009423	chorismate biosynthetic process	biological_process	10
TRINITY_DN10236_c0_g1	TAIR|locus:2081036	68.4	2e-24	819809	MEE32	GO:0009507	chloroplast	cellular_component	7
TRINITY_DN10236_c0_g1	TAIR|locus:2081036	68.4	2e-24	819809	MEE32	GO:0009570	chloroplast stroma	cellular_component	8
TRINITY_DN10236_c0_g1	TAIR|locus:2081036	68.4	2e-24	819809	MEE32	GO:0009793	embryo development ending in seed dormancy	biological_process	5
TRINITY_DN10236_c0_g1	TAIR|locus:2081036	68.4	2e-24	819809	MEE32	GO:0019632	shikimate metabolic process	biological_process	9
TRINITY_DN10236_c0_g1	TAIR|locus:2081036	68.4	2e-24	819809	MEE32	GO:0050661	NADP binding	molecular_function	6
TRINITY_DN10236_c0_g1	TAIR|locus:2081036	68.4	2e-24	819809	MEE32	GO:0055114	oxidation-reduction process	biological_process	4
TRINITY_DN10239_c0_g1	ZFIN|ZDB-GENE-030131-5177	98.2	8.7e-24	-	atp5l	GO:0000276	mitochondrial proton-transporting ATP synthase complex, coupling factor F(o)	cellular_component	7
TRINITY_DN10239_c0_g1	ZFIN|ZDB-GENE-030131-5177	98.2	8.7e-24	-	atp5l	GO:0015078	proton transmembrane transporter activity	molecular_function	9
TRINITY_DN10239_c0_g1	ZFIN|ZDB-GENE-030131-5177	98.2	8.7e-24	-	atp5l	GO:0015986	ATP synthesis coupled proton transport	biological_process	13
TRINITY_DN10239_c0_g1	ZFIN|ZDB-GENE-030131-5177	98.2	8.7e-24	-	atp5l	GO:0046933	proton-transporting ATP synthase activity, rotational mechanism	molecular_function	10
TRINITY_DN10261_c0_g1	TAIR|locus:2037838	84.7	1.4e-26	838075	AT1G15120	GO:0005739	mitochondrion	cellular_component	6
TRINITY_DN10261_c0_g1	TAIR|locus:2037838	84.7	1.4e-26	838075	AT1G15120	GO:0005750	mitochondrial respiratory chain complex III	cellular_component	6
TRINITY_DN10261_c0_g1	TAIR|locus:2037838	84.7	1.4e-26	838075	AT1G15120	GO:0006122	mitochondrial electron transport, ubiquinol to cytochrome c	biological_process	8
TRINITY_DN10261_c0_g1	TAIR|locus:2037838	84.7	1.4e-26	838075	AT1G15120	GO:0008121	ubiquinol-cytochrome-c reductase activity	molecular_function	6
TRINITY_DN10275_c0_g1	TAIR|locus:2151977	77.6	1.5e-21	834758	BI1	GO:0000038	very long-chain fatty acid metabolic process	biological_process	10
TRINITY_DN10275_c0_g1	TAIR|locus:2151977	77.6	1.5e-21	834758	BI1	GO:0005515	protein binding	molecular_function	4
TRINITY_DN10275_c0_g1	TAIR|locus:2151977	77.6	1.5e-21	834758	BI1	GO:0005635	nuclear envelope	cellular_component	6
TRINITY_DN10275_c0_g1	TAIR|locus:2151977	77.6	1.5e-21	834758	BI1	GO:0005737	cytoplasm	cellular_component	5
TRINITY_DN10275_c0_g1	TAIR|locus:2151977	77.6	1.5e-21	834758	BI1	GO:0005783	endoplasmic reticulum	cellular_component	6
TRINITY_DN10275_c0_g1	TAIR|locus:2151977	77.6	1.5e-21	834758	BI1	GO:0005789	endoplasmic reticulum membrane	cellular_component	5
TRINITY_DN10275_c0_g1	TAIR|locus:2151977	77.6	1.5e-21	834758	BI1	GO:0005886	plasma membrane	cellular_component	4
TRINITY_DN10275_c0_g1	TAIR|locus:2151977	77.6	1.5e-21	834758	BI1	GO:0006983	ER overload response	biological_process	6
TRINITY_DN10275_c0_g1	TAIR|locus:2151977	77.6	1.5e-21	834758	BI1	GO:0009414	response to water deprivation	biological_process	5
TRINITY_DN10275_c0_g1	TAIR|locus:2151977	77.6	1.5e-21	834758	BI1	GO:0016021	integral component of membrane	cellular_component	5
TRINITY_DN10275_c0_g1	TAIR|locus:2151977	77.6	1.5e-21	834758	BI1	GO:0043066	negative regulation of apoptotic process	biological_process	9
TRINITY_DN10275_c0_g1	TAIR|locus:2151977	77.6	1.5e-21	834758	BI1	GO:0043069	negative regulation of programmed cell death	biological_process	8
TRINITY_DN10281_c0_g1	UNIPROTKB|C5XR62	95.9	2.3e-33	8054903	Sb03g028340	GO:0004683	calmodulin-dependent protein kinase activity	molecular_function	9
TRINITY_DN10281_c0_g1	UNIPROTKB|C5XR62	95.9	2.3e-33	8054903	Sb03g028340	GO:0005516	calmodulin binding	molecular_function	5
TRINITY_DN10281_c0_g1	UNIPROTKB|C5XR62	95.9	2.3e-33	8054903	Sb03g028340	GO:0005634	nucleus	cellular_component	6
TRINITY_DN10281_c0_g1	UNIPROTKB|C5XR62	95.9	2.3e-33	8054903	Sb03g028340	GO:0005737	cytoplasm	cellular_component	5
TRINITY_DN10281_c0_g1	UNIPROTKB|C5XR62	95.9	2.3e-33	8054903	Sb03g028340	GO:0009738	abscisic acid-activated signaling pathway	biological_process	6
TRINITY_DN10281_c0_g1	UNIPROTKB|C5XR62	95.9	2.3e-33	8054903	Sb03g028340	GO:0009931	calcium-dependent protein serine/threonine kinase activity	molecular_function	9
TRINITY_DN10281_c0_g1	UNIPROTKB|C5XR62	95.9	2.3e-33	8054903	Sb03g028340	GO:0018105	peptidyl-serine phosphorylation	biological_process	10
TRINITY_DN10281_c0_g1	UNIPROTKB|C5XR62	95.9	2.3e-33	8054903	Sb03g028340	GO:0035556	intracellular signal transduction	biological_process	5
TRINITY_DN10281_c0_g1	UNIPROTKB|C5XR62	95.9	2.3e-33	8054903	Sb03g028340	GO:0046777	protein autophosphorylation	biological_process	10
TRINITY_DN10300_c0_g1	TAIR|locus:2172144	70.1	1.3e-22	835546	ORRM2	GO:0003723	RNA binding	molecular_function	6
TRINITY_DN10300_c0_g1	TAIR|locus:2172144	70.1	1.3e-22	835546	ORRM2	GO:0005515	protein binding	molecular_function	4
TRINITY_DN10300_c0_g1	TAIR|locus:2172144	70.1	1.3e-22	835546	ORRM2	GO:0005739	mitochondrion	cellular_component	6
TRINITY_DN10300_c0_g1	TAIR|locus:2172144	70.1	1.3e-22	835546	ORRM2	GO:0006397	mRNA processing	biological_process	10
TRINITY_DN10300_c0_g1	TAIR|locus:2172144	70.1	1.3e-22	835546	ORRM2	GO:0080156	mitochondrial mRNA modification	biological_process	11
TRINITY_DN10309_c0_g1	TAIR|locus:2148388	52.9	9.3e-08	836070	RTFL5	GO:0003674	molecular_function	molecular_function	2
TRINITY_DN10309_c0_g1	TAIR|locus:2148388	52.9	9.3e-08	836070	RTFL5	GO:0005634	nucleus	cellular_component	6
TRINITY_DN10309_c0_g1	TAIR|locus:2148388	52.9	9.3e-08	836070	RTFL5	GO:0048367	shoot system development	biological_process	6
TRINITY_DN10345_c0_g1	TAIR|locus:2046079	78.5	2.6e-30	815712	AT2G12400	GO:0003674	molecular_function	molecular_function	2
TRINITY_DN10345_c0_g1	TAIR|locus:2046079	78.5	2.6e-30	815712	AT2G12400	GO:0005576	extracellular region	cellular_component	3
TRINITY_DN10345_c0_g1	TAIR|locus:2046079	78.5	2.6e-30	815712	AT2G12400	GO:0008150	biological_process	biological_process	2
TRINITY_DN10345_c0_g1	TAIR|locus:2046079	78.5	2.6e-30	815712	AT2G12400	GO:0009506	plasmodesma	cellular_component	5
TRINITY_DN10345_c0_g1	TAIR|locus:2046079	78.5	2.6e-30	815712	AT2G12400	GO:0016020	membrane	cellular_component	3
TRINITY_DN10345_c0_g1	TAIR|locus:2046079	78.5	2.6e-30	815712	AT2G12400	GO:0016021	integral component of membrane	cellular_component	5
TRINITY_DN10356_c0_g1	ZFIN|ZDB-GENE-081104-317	76.5	1.9e-37	100002946	cxcl8a	GO:0001570	vasculogenesis	biological_process	6
TRINITY_DN10356_c0_g1	ZFIN|ZDB-GENE-081104-317	76.5	1.9e-37	100002946	cxcl8a	GO:0002244	hematopoietic progenitor cell differentiation	biological_process	6
TRINITY_DN10356_c0_g1	ZFIN|ZDB-GENE-081104-317	76.5	1.9e-37	100002946	cxcl8a	GO:0002523	leukocyte migration involved in inflammatory response	biological_process	5
TRINITY_DN10356_c0_g1	ZFIN|ZDB-GENE-081104-317	76.5	1.9e-37	100002946	cxcl8a	GO:0002631	regulation of granuloma formation	biological_process	10
TRINITY_DN10356_c0_g1	ZFIN|ZDB-GENE-081104-317	76.5	1.9e-37	100002946	cxcl8a	GO:0002690	positive regulation of leukocyte chemotaxis	biological_process	8
TRINITY_DN10356_c0_g1	ZFIN|ZDB-GENE-081104-317	76.5	1.9e-37	100002946	cxcl8a	GO:0005576	extracellular region	cellular_component	3
TRINITY_DN10356_c0_g1	ZFIN|ZDB-GENE-081104-317	76.5	1.9e-37	100002946	cxcl8a	GO:0005615	extracellular space	cellular_component	4
TRINITY_DN10356_c0_g1	ZFIN|ZDB-GENE-081104-317	76.5	1.9e-37	100002946	cxcl8a	GO:0006935	chemotaxis	biological_process	5
TRINITY_DN10356_c0_g1	ZFIN|ZDB-GENE-081104-317	76.5	1.9e-37	100002946	cxcl8a	GO:0006952	defense response	biological_process	5
TRINITY_DN10356_c0_g1	ZFIN|ZDB-GENE-081104-317	76.5	1.9e-37	100002946	cxcl8a	GO:0006954	inflammatory response	biological_process	6
TRINITY_DN10356_c0_g1	ZFIN|ZDB-GENE-081104-317	76.5	1.9e-37	100002946	cxcl8a	GO:0006955	immune response	biological_process	4
TRINITY_DN10356_c0_g1	ZFIN|ZDB-GENE-081104-317	76.5	1.9e-37	100002946	cxcl8a	GO:0007186	G-protein coupled receptor signaling pathway	biological_process	5
TRINITY_DN10356_c0_g1	ZFIN|ZDB-GENE-081104-317	76.5	1.9e-37	100002946	cxcl8a	GO:0008009	chemokine activity	molecular_function	8
TRINITY_DN10356_c0_g1	ZFIN|ZDB-GENE-081104-317	76.5	1.9e-37	100002946	cxcl8a	GO:0009611	response to wounding	biological_process	5
TRINITY_DN10356_c0_g1	ZFIN|ZDB-GENE-081104-317	76.5	1.9e-37	100002946	cxcl8a	GO:0009617	response to bacterium	biological_process	7
TRINITY_DN10356_c0_g1	ZFIN|ZDB-GENE-081104-317	76.5	1.9e-37	100002946	cxcl8a	GO:0030593	neutrophil chemotaxis	biological_process	7
TRINITY_DN10356_c0_g1	ZFIN|ZDB-GENE-081104-317	76.5	1.9e-37	100002946	cxcl8a	GO:0032496	response to lipopolysaccharide	biological_process	7
TRINITY_DN10356_c0_g1	ZFIN|ZDB-GENE-081104-317	76.5	1.9e-37	100002946	cxcl8a	GO:0042127	regulation of cell proliferation	biological_process	6
TRINITY_DN10356_c0_g1	ZFIN|ZDB-GENE-081104-317	76.5	1.9e-37	100002946	cxcl8a	GO:0045236	CXCR chemokine receptor binding	molecular_function	8
TRINITY_DN10356_c0_g1	ZFIN|ZDB-GENE-081104-317	76.5	1.9e-37	100002946	cxcl8a	GO:0060218	hematopoietic stem cell differentiation	biological_process	7
TRINITY_DN10356_c0_g1	ZFIN|ZDB-GENE-081104-317	76.5	1.9e-37	100002946	cxcl8a	GO:0070098	chemokine-mediated signaling pathway	biological_process	7
TRINITY_DN10356_c0_g1	ZFIN|ZDB-GENE-081104-317	76.5	1.9e-37	100002946	cxcl8a	GO:0071305	cellular response to vitamin D	biological_process	8
TRINITY_DN10356_c0_g1	ZFIN|ZDB-GENE-081104-317	76.5	1.9e-37	100002946	cxcl8a	GO:0071621	granulocyte chemotaxis	biological_process	6
TRINITY_DN10356_c0_g1	ZFIN|ZDB-GENE-081104-317	76.5	1.9e-37	100002946	cxcl8a	GO:0098508	endothelial to hematopoietic transition	biological_process	8
TRINITY_DN10356_c0_g1	ZFIN|ZDB-GENE-081104-317	76.5	1.9e-37	100002946	cxcl8a	GO:1990266	neutrophil migration	biological_process	7
TRINITY_DN10359_c0_g1	UNIPROTKB|Q5ZIT7	100	6.5e-37	423182	PSMC3	GO:0000932	P-body	cellular_component	8
TRINITY_DN10359_c0_g1	UNIPROTKB|Q5ZIT7	100	6.5e-37	423182	PSMC3	GO:0005524	ATP binding	molecular_function	5
TRINITY_DN10359_c0_g1	UNIPROTKB|Q5ZIT7	100	6.5e-37	423182	PSMC3	GO:0008540	proteasome regulatory particle, base subcomplex	cellular_component	4
TRINITY_DN10359_c0_g1	UNIPROTKB|Q5ZIT7	100	6.5e-37	423182	PSMC3	GO:0016020	membrane	cellular_component	3
TRINITY_DN10359_c0_g1	UNIPROTKB|Q5ZIT7	100	6.5e-37	423182	PSMC3	GO:0017025	TBP-class protein binding	molecular_function	7
TRINITY_DN10359_c0_g1	UNIPROTKB|Q5ZIT7	100	6.5e-37	423182	PSMC3	GO:0030433	ubiquitin-dependent ERAD pathway	biological_process	8
TRINITY_DN10359_c0_g1	UNIPROTKB|Q5ZIT7	100	6.5e-37	423182	PSMC3	GO:0031595	nuclear proteasome complex	cellular_component	6
TRINITY_DN10359_c0_g1	UNIPROTKB|Q5ZIT7	100	6.5e-37	423182	PSMC3	GO:0031597	cytosolic proteasome complex	cellular_component	6
TRINITY_DN10359_c0_g1	UNIPROTKB|Q5ZIT7	100	6.5e-37	423182	PSMC3	GO:0036402	proteasome-activating ATPase activity	molecular_function	11
TRINITY_DN10359_c0_g1	UNIPROTKB|Q5ZIT7	100	6.5e-37	423182	PSMC3	GO:0045899	positive regulation of RNA polymerase II transcriptional preinitiation complex assembly	biological_process	8
TRINITY_DN10359_c0_g1	UNIPROTKB|Q5ZIT7	100	6.5e-37	423182	PSMC3	GO:1901800	positive regulation of proteasomal protein catabolic process	biological_process	11
TRINITY_DN10381_c0_g1	UNIPROTKB|F1MR20	65.8	9e-22	-	VAV1	GO:0005089	Rho guanyl-nucleotide exchange factor activity	molecular_function	9
TRINITY_DN10381_c0_g1	UNIPROTKB|F1MR20	65.8	9e-22	-	VAV1	GO:0005622	intracellular	cellular_component	4
TRINITY_DN10381_c0_g1	UNIPROTKB|F1MR20	65.8	9e-22	-	VAV1	GO:0007264	small GTPase mediated signal transduction	biological_process	6
TRINITY_DN10381_c0_g1	UNIPROTKB|F1MR20	65.8	9e-22	-	VAV1	GO:0035023	regulation of Rho protein signal transduction	biological_process	11
TRINITY_DN10381_c0_g1	UNIPROTKB|F1MR20	65.8	9e-22	-	VAV1	GO:0043547	positive regulation of GTPase activity	biological_process	8
TRINITY_DN103_c0_g1	ZFIN|ZDB-GENE-011205-9	89.5	3.8e-35	140533	mt-nd3	GO:0005739	mitochondrion	cellular_component	6
TRINITY_DN103_c0_g1	ZFIN|ZDB-GENE-011205-9	89.5	3.8e-35	140533	mt-nd3	GO:0005747	mitochondrial respiratory chain complex I	cellular_component	7
TRINITY_DN103_c0_g1	ZFIN|ZDB-GENE-011205-9	89.5	3.8e-35	140533	mt-nd3	GO:0008137	NADH dehydrogenase (ubiquinone) activity	molecular_function	8
TRINITY_DN103_c0_g1	ZFIN|ZDB-GENE-011205-9	89.5	3.8e-35	140533	mt-nd3	GO:0016020	membrane	cellular_component	3
TRINITY_DN103_c0_g1	ZFIN|ZDB-GENE-011205-9	89.5	3.8e-35	140533	mt-nd3	GO:0016021	integral component of membrane	cellular_component	5
TRINITY_DN103_c0_g1	ZFIN|ZDB-GENE-011205-9	89.5	3.8e-35	140533	mt-nd3	GO:0016491	oxidoreductase activity	molecular_function	4
TRINITY_DN103_c0_g1	ZFIN|ZDB-GENE-011205-9	89.5	3.8e-35	140533	mt-nd3	GO:0055114	oxidation-reduction process	biological_process	4
TRINITY_DN103_c0_g1	ZFIN|ZDB-GENE-011205-9	89.5	3.8e-35	140533	mt-nd3	GO:0070469	respiratory chain	cellular_component	4
TRINITY_DN10406_c0_g1	TAIR|locus:2090315	47.3	2.5e-22	822104	AT3G25130	GO:0003674	molecular_function	molecular_function	2
TRINITY_DN10406_c0_g1	TAIR|locus:2090315	47.3	2.5e-22	822104	AT3G25130	GO:0005886	plasma membrane	cellular_component	4
TRINITY_DN10406_c0_g1	TAIR|locus:2090315	47.3	2.5e-22	822104	AT3G25130	GO:0008150	biological_process	biological_process	2
TRINITY_DN10406_c0_g1	TAIR|locus:2090315	47.3	2.5e-22	822104	AT3G25130	GO:0009507	chloroplast	cellular_component	7
TRINITY_DN10406_c0_g1	TAIR|locus:2090315	47.3	2.5e-22	822104	AT3G25130	GO:0016021	integral component of membrane	cellular_component	5
TRINITY_DN10415_c0_g1	UNIPROTKB|I1KV14	100	2.7e-35	100783237	GLYMA_08G200500	GO:0004652	polynucleotide adenylyltransferase activity	molecular_function	8
TRINITY_DN10415_c0_g1	UNIPROTKB|I1KV14	100	2.7e-35	100783237	GLYMA_08G200500	GO:0005634	nucleus	cellular_component	6
TRINITY_DN10415_c0_g1	UNIPROTKB|I1KV14	100	2.7e-35	100783237	GLYMA_08G200500	GO:0006378	mRNA polyadenylation	biological_process	12
TRINITY_DN10426_c0_g1	UNIPROTKB|R4GM14	74.6	2.5e-14	431336	LOC100857357	GO:0000188	inactivation of MAPK activity	biological_process	13
TRINITY_DN10426_c0_g1	UNIPROTKB|R4GM14	74.6	2.5e-14	431336	LOC100857357	GO:0004725	protein tyrosine phosphatase activity	molecular_function	9
TRINITY_DN10426_c0_g1	UNIPROTKB|R4GM14	74.6	2.5e-14	431336	LOC100857357	GO:0005654	nucleoplasm	cellular_component	6
TRINITY_DN10426_c0_g1	UNIPROTKB|R4GM14	74.6	2.5e-14	431336	LOC100857357	GO:0005737	cytoplasm	cellular_component	5
TRINITY_DN10426_c0_g1	UNIPROTKB|R4GM14	74.6	2.5e-14	431336	LOC100857357	GO:0017017	MAP kinase tyrosine/serine/threonine phosphatase activity	molecular_function	10
TRINITY_DN10426_c0_g1	UNIPROTKB|R4GM14	74.6	2.5e-14	431336	LOC100857357	GO:0035335	peptidyl-tyrosine dephosphorylation	biological_process	10
TRINITY_DN1042_c0_g1	WB|WBGene00001747	85.5	3.9e-30	179486	gsp-1	GO:0001933	negative regulation of protein phosphorylation	biological_process	10
TRINITY_DN1042_c0_g1	WB|WBGene00001747	85.5	3.9e-30	179486	gsp-1	GO:0004721	phosphoprotein phosphatase activity	molecular_function	8
TRINITY_DN1042_c0_g1	WB|WBGene00001747	85.5	3.9e-30	179486	gsp-1	GO:0005515	protein binding	molecular_function	4
TRINITY_DN1042_c0_g1	WB|WBGene00001747	85.5	3.9e-30	179486	gsp-1	GO:0006470	protein dephosphorylation	biological_process	9
TRINITY_DN1042_c0_g1	WB|WBGene00001747	85.5	3.9e-30	179486	gsp-1	GO:0007049	cell cycle	biological_process	4
TRINITY_DN1042_c0_g1	WB|WBGene00001747	85.5	3.9e-30	179486	gsp-1	GO:0010628	positive regulation of gene expression	biological_process	8
TRINITY_DN1042_c0_g1	WB|WBGene00001747	85.5	3.9e-30	179486	gsp-1	GO:0016569	covalent chromatin modification	biological_process	6
TRINITY_DN1042_c0_g1	WB|WBGene00001747	85.5	3.9e-30	179486	gsp-1	GO:0016787	hydrolase activity	molecular_function	4
TRINITY_DN1042_c0_g1	WB|WBGene00001747	85.5	3.9e-30	179486	gsp-1	GO:0046872	metal ion binding	molecular_function	6
TRINITY_DN1042_c0_g1	WB|WBGene00001747	85.5	3.9e-30	179486	gsp-1	GO:0051301	cell division	biological_process	4
TRINITY_DN1042_c0_g1	WB|WBGene00001747	85.5	3.9e-30	179486	gsp-1	GO:0051321	meiotic cell cycle	biological_process	5
TRINITY_DN1045_c0_g1	TAIR|locus:2129755	88	3.5e-38	827183	SDG2	GO:0005634	nucleus	cellular_component	6
TRINITY_DN1045_c0_g1	TAIR|locus:2129755	88	3.5e-38	827183	SDG2	GO:0009791	post-embryonic development	biological_process	4
TRINITY_DN1045_c0_g1	TAIR|locus:2129755	88	3.5e-38	827183	SDG2	GO:0010228	vegetative to reproductive phase transition of meristem	biological_process	5
TRINITY_DN1045_c0_g1	TAIR|locus:2129755	88	3.5e-38	827183	SDG2	GO:0042800	histone methyltransferase activity (H3-K4 specific)	molecular_function	10
TRINITY_DN1045_c0_g1	TAIR|locus:2129755	88	3.5e-38	827183	SDG2	GO:0048440	carpel development	biological_process	6
TRINITY_DN1045_c0_g1	TAIR|locus:2129755	88	3.5e-38	827183	SDG2	GO:0048443	stamen development	biological_process	6
TRINITY_DN10494_c0_g1	TAIR|locus:2207001	61.4	8.1e-08	843546	PATL1	GO:0002020	protease binding	molecular_function	6
TRINITY_DN10494_c0_g1	TAIR|locus:2207001	61.4	8.1e-08	843546	PATL1	GO:0005215	transporter activity	molecular_function	3
TRINITY_DN10494_c0_g1	TAIR|locus:2207001	61.4	8.1e-08	843546	PATL1	GO:0005634	nucleus	cellular_component	6
TRINITY_DN10494_c0_g1	TAIR|locus:2207001	61.4	8.1e-08	843546	PATL1	GO:0005773	vacuole	cellular_component	6
TRINITY_DN10494_c0_g1	TAIR|locus:2207001	61.4	8.1e-08	843546	PATL1	GO:0005794	Golgi apparatus	cellular_component	6
TRINITY_DN10494_c0_g1	TAIR|locus:2207001	61.4	8.1e-08	843546	PATL1	GO:0005829	cytosol	cellular_component	6
TRINITY_DN10494_c0_g1	TAIR|locus:2207001	61.4	8.1e-08	843546	PATL1	GO:0005886	plasma membrane	cellular_component	4
TRINITY_DN10494_c0_g1	TAIR|locus:2207001	61.4	8.1e-08	843546	PATL1	GO:0006810	transport	biological_process	5
TRINITY_DN10494_c0_g1	TAIR|locus:2207001	61.4	8.1e-08	843546	PATL1	GO:0007049	cell cycle	biological_process	4
TRINITY_DN10494_c0_g1	TAIR|locus:2207001	61.4	8.1e-08	843546	PATL1	GO:0008289	lipid binding	molecular_function	4
TRINITY_DN10494_c0_g1	TAIR|locus:2207001	61.4	8.1e-08	843546	PATL1	GO:0009506	plasmodesma	cellular_component	5
TRINITY_DN10494_c0_g1	TAIR|locus:2207001	61.4	8.1e-08	843546	PATL1	GO:0009507	chloroplast	cellular_component	7
TRINITY_DN10494_c0_g1	TAIR|locus:2207001	61.4	8.1e-08	843546	PATL1	GO:0009860	pollen tube growth	biological_process	8
TRINITY_DN10494_c0_g1	TAIR|locus:2207001	61.4	8.1e-08	843546	PATL1	GO:0016020	membrane	cellular_component	3
TRINITY_DN10494_c0_g1	TAIR|locus:2207001	61.4	8.1e-08	843546	PATL1	GO:0048046	apoplast	cellular_component	4
TRINITY_DN10494_c0_g1	TAIR|locus:2207001	61.4	8.1e-08	843546	PATL1	GO:0051301	cell division	biological_process	4
TRINITY_DN10521_c0_g1	ZFIN|ZDB-GENE-030131-713	97.9	2.9e-12	321994	nono	GO:0000398	mRNA splicing, via spliceosome	biological_process	13
TRINITY_DN10521_c0_g1	ZFIN|ZDB-GENE-030131-713	97.9	2.9e-12	321994	nono	GO:0000976	transcription regulatory region sequence-specific DNA binding	molecular_function	8
TRINITY_DN10521_c0_g1	ZFIN|ZDB-GENE-030131-713	97.9	2.9e-12	321994	nono	GO:0003676	nucleic acid binding	molecular_function	5
TRINITY_DN10521_c0_g1	ZFIN|ZDB-GENE-030131-713	97.9	2.9e-12	321994	nono	GO:0003723	RNA binding	molecular_function	6
TRINITY_DN10521_c0_g1	ZFIN|ZDB-GENE-030131-713	97.9	2.9e-12	321994	nono	GO:0005634	nucleus	cellular_component	6
TRINITY_DN10521_c0_g1	ZFIN|ZDB-GENE-030131-713	97.9	2.9e-12	321994	nono	GO:0006355	regulation of transcription, DNA-templated	biological_process	8
TRINITY_DN10521_c0_g1	ZFIN|ZDB-GENE-030131-713	97.9	2.9e-12	321994	nono	GO:0007417	central nervous system development	biological_process	6
TRINITY_DN10521_c0_g1	ZFIN|ZDB-GENE-030131-713	97.9	2.9e-12	321994	nono	GO:0061053	somite development	biological_process	7
TRINITY_DN10521_c0_g1	ZFIN|ZDB-GENE-030131-713	97.9	2.9e-12	321994	nono	GO:0071599	otic vesicle development	biological_process	7
TRINITY_DN10538_c0_g1	WB|WBGene00004419	68.8	6.8e-23	177203	rpl-7A	GO:0000470	maturation of LSU-rRNA	biological_process	12
TRINITY_DN10538_c0_g1	WB|WBGene00004419	68.8	6.8e-23	177203	rpl-7A	GO:0003723	RNA binding	molecular_function	6
TRINITY_DN10538_c0_g1	WB|WBGene00004419	68.8	6.8e-23	177203	rpl-7A	GO:0005516	calmodulin binding	molecular_function	5
TRINITY_DN10538_c0_g1	WB|WBGene00004419	68.8	6.8e-23	177203	rpl-7A	GO:0005840	ribosome	cellular_component	6
TRINITY_DN10538_c0_g1	WB|WBGene00004419	68.8	6.8e-23	177203	rpl-7A	GO:0006412	translation	biological_process	8
TRINITY_DN10538_c0_g1	WB|WBGene00004419	68.8	6.8e-23	177203	rpl-7A	GO:0022625	cytosolic large ribosomal subunit	cellular_component	8
TRINITY_DN10542_c1_g1	ZFIN|ZDB-GENE-121219-1	58.1	1.8e-19	100329481	cd79b	GO:0005737	cytoplasm	cellular_component	5
TRINITY_DN10542_c1_g1	ZFIN|ZDB-GENE-121219-1	58.1	1.8e-19	100329481	cd79b	GO:0005887	integral component of plasma membrane	cellular_component	6
TRINITY_DN10542_c1_g1	ZFIN|ZDB-GENE-121219-1	58.1	1.8e-19	100329481	cd79b	GO:0009897	external side of plasma membrane	cellular_component	5
TRINITY_DN10542_c1_g1	ZFIN|ZDB-GENE-121219-1	58.1	1.8e-19	100329481	cd79b	GO:0016020	membrane	cellular_component	3
TRINITY_DN10542_c1_g1	ZFIN|ZDB-GENE-121219-1	58.1	1.8e-19	100329481	cd79b	GO:0016021	integral component of membrane	cellular_component	5
TRINITY_DN10542_c1_g1	ZFIN|ZDB-GENE-121219-1	58.1	1.8e-19	100329481	cd79b	GO:0019815	B cell receptor complex	cellular_component	5
TRINITY_DN10542_c1_g1	ZFIN|ZDB-GENE-121219-1	58.1	1.8e-19	100329481	cd79b	GO:0030183	B cell differentiation	biological_process	8
TRINITY_DN10542_c1_g1	ZFIN|ZDB-GENE-121219-1	58.1	1.8e-19	100329481	cd79b	GO:0050853	B cell receptor signaling pathway	biological_process	8
TRINITY_DN10551_c0_g2	ZFIN|ZDB-GENE-060825-81	79.8	2.8e-33	566846	dub	GO:0001947	heart looping	biological_process	7
TRINITY_DN10551_c0_g2	ZFIN|ZDB-GENE-060825-81	79.8	2.8e-33	566846	dub	GO:0003146	heart jogging	biological_process	7
TRINITY_DN10551_c0_g2	ZFIN|ZDB-GENE-060825-81	79.8	2.8e-33	566846	dub	GO:0003674	molecular_function	molecular_function	2
TRINITY_DN10551_c0_g2	ZFIN|ZDB-GENE-060825-81	79.8	2.8e-33	566846	dub	GO:0005575	cellular_component	cellular_component	2
TRINITY_DN10551_c0_g2	ZFIN|ZDB-GENE-060825-81	79.8	2.8e-33	566846	dub	GO:0007368	determination of left/right symmetry	biological_process	7
TRINITY_DN10551_c0_g2	ZFIN|ZDB-GENE-060825-81	79.8	2.8e-33	566846	dub	GO:0060271	cilium assembly	biological_process	7
TRINITY_DN10551_c0_g2	ZFIN|ZDB-GENE-060825-81	79.8	2.8e-33	566846	dub	GO:0061341	non-canonical Wnt signaling pathway involved in heart development	biological_process	9
TRINITY_DN1055_c0_g1	TAIR|locus:2172818	83.3	1.1e-32	832450	AT5G23850	GO:0005576	extracellular region	cellular_component	3
TRINITY_DN1055_c0_g1	TAIR|locus:2172818	83.3	1.1e-32	832450	AT5G23850	GO:0005768	endosome	cellular_component	7
TRINITY_DN1055_c0_g1	TAIR|locus:2172818	83.3	1.1e-32	832450	AT5G23850	GO:0005794	Golgi apparatus	cellular_component	6
TRINITY_DN1055_c0_g1	TAIR|locus:2172818	83.3	1.1e-32	832450	AT5G23850	GO:0005802	trans-Golgi network	cellular_component	7
TRINITY_DN1055_c0_g1	TAIR|locus:2172818	83.3	1.1e-32	832450	AT5G23850	GO:0016021	integral component of membrane	cellular_component	5
TRINITY_DN1055_c0_g1	TAIR|locus:2172818	83.3	1.1e-32	832450	AT5G23850	GO:0046527	glucosyltransferase activity	molecular_function	7
TRINITY_DN10575_c0_g1	TAIR|locus:2012577	78.5	1.1e-25	838013	AL7	GO:0003677	DNA binding	molecular_function	6
TRINITY_DN10575_c0_g1	TAIR|locus:2012577	78.5	1.1e-25	838013	AL7	GO:0005634	nucleus	cellular_component	6
TRINITY_DN10575_c0_g1	TAIR|locus:2012577	78.5	1.1e-25	838013	AL7	GO:0006351	transcription, DNA-templated	biological_process	8
TRINITY_DN10575_c0_g1	TAIR|locus:2012577	78.5	1.1e-25	838013	AL7	GO:0006355	regulation of transcription, DNA-templated	biological_process	8
TRINITY_DN10575_c0_g1	TAIR|locus:2012577	78.5	1.1e-25	838013	AL7	GO:0016569	covalent chromatin modification	biological_process	6
TRINITY_DN10575_c0_g1	TAIR|locus:2012577	78.5	1.1e-25	838013	AL7	GO:0035064	methylated histone binding	molecular_function	6
TRINITY_DN10575_c0_g1	TAIR|locus:2012577	78.5	1.1e-25	838013	AL7	GO:0046872	metal ion binding	molecular_function	6
TRINITY_DN10576_c0_g2	ZFIN|ZDB-GENE-040622-5	100	7.6e-29	405889	rps29	GO:0001525	angiogenesis	biological_process	5
TRINITY_DN10576_c0_g2	ZFIN|ZDB-GENE-040622-5	100	7.6e-29	405889	rps29	GO:0001570	vasculogenesis	biological_process	6
TRINITY_DN10576_c0_g2	ZFIN|ZDB-GENE-040622-5	100	7.6e-29	405889	rps29	GO:0003735	structural constituent of ribosome	molecular_function	4
TRINITY_DN10576_c0_g2	ZFIN|ZDB-GENE-040622-5	100	7.6e-29	405889	rps29	GO:0005622	intracellular	cellular_component	4
TRINITY_DN10576_c0_g2	ZFIN|ZDB-GENE-040622-5	100	7.6e-29	405889	rps29	GO:0005840	ribosome	cellular_component	6
TRINITY_DN10576_c0_g2	ZFIN|ZDB-GENE-040622-5	100	7.6e-29	405889	rps29	GO:0006412	translation	biological_process	8
TRINITY_DN10576_c0_g2	ZFIN|ZDB-GENE-040622-5	100	7.6e-29	405889	rps29	GO:0008270	zinc ion binding	molecular_function	8
TRINITY_DN10576_c0_g2	ZFIN|ZDB-GENE-040622-5	100	7.6e-29	405889	rps29	GO:0022627	cytosolic small ribosomal subunit	cellular_component	8
TRINITY_DN10576_c0_g2	ZFIN|ZDB-GENE-040622-5	100	7.6e-29	405889	rps29	GO:0030218	erythrocyte differentiation	biological_process	7
TRINITY_DN10576_c0_g2	ZFIN|ZDB-GENE-040622-5	100	7.6e-29	405889	rps29	GO:0043009	chordate embryonic development	biological_process	7
TRINITY_DN10576_c0_g2	ZFIN|ZDB-GENE-040622-5	100	7.6e-29	405889	rps29	GO:0048821	erythrocyte development	biological_process	7
TRINITY_DN10576_c0_g2	ZFIN|ZDB-GENE-040622-5	100	7.6e-29	405889	rps29	GO:0051726	regulation of cell cycle	biological_process	6
TRINITY_DN10576_c0_g2	ZFIN|ZDB-GENE-040622-5	100	7.6e-29	405889	rps29	GO:0060218	hematopoietic stem cell differentiation	biological_process	7
TRINITY_DN10576_c0_g2	ZFIN|ZDB-GENE-040622-5	100	7.6e-29	405889	rps29	GO:0072332	intrinsic apoptotic signaling pathway by p53 class mediator	biological_process	7
TRINITY_DN10601_c0_g1	UNIPROTKB|I1KWH6	100	3.1e-45	100781796	GLYMA_08G249600	GO:0003735	structural constituent of ribosome	molecular_function	4
TRINITY_DN10601_c0_g1	UNIPROTKB|I1KWH6	100	3.1e-45	100781796	GLYMA_08G249600	GO:0006412	translation	biological_process	8
TRINITY_DN10603_c0_g1	ZFIN|ZDB-GENE-040426-1926	100	6.4e-22	406267	hnrnpk	GO:0003676	nucleic acid binding	molecular_function	5
TRINITY_DN10603_c0_g1	ZFIN|ZDB-GENE-040426-1926	100	6.4e-22	406267	hnrnpk	GO:0003677	DNA binding	molecular_function	6
TRINITY_DN10603_c0_g1	ZFIN|ZDB-GENE-040426-1926	100	6.4e-22	406267	hnrnpk	GO:0003723	RNA binding	molecular_function	6
TRINITY_DN10603_c0_g1	ZFIN|ZDB-GENE-040426-1926	100	6.4e-22	406267	hnrnpk	GO:0006357	regulation of transcription by RNA polymerase II	biological_process	9
TRINITY_DN10603_c0_g1	ZFIN|ZDB-GENE-040426-1926	100	6.4e-22	406267	hnrnpk	GO:0006396	RNA processing	biological_process	9
TRINITY_DN10603_c0_g1	ZFIN|ZDB-GENE-040426-1926	100	6.4e-22	406267	hnrnpk	GO:0019012	virion	cellular_component	3
TRINITY_DN10603_c0_g1	ZFIN|ZDB-GENE-040426-1926	100	6.4e-22	406267	hnrnpk	GO:0019013	viral nucleocapsid	cellular_component	4
TRINITY_DN10614_c1_g1	UNIPROTKB|Q9AUW1	100	1.2e-40	4334174	LOC_Os03g55120	GO:0046658	anchored component of plasma membrane	cellular_component	6
TRINITY_DN10622_c0_g1	UNIPROTKB|Q75LL6	100	4.9e-30	4334126	ADA2	GO:0003682	chromatin binding	molecular_function	4
TRINITY_DN10622_c0_g1	UNIPROTKB|Q75LL6	100	4.9e-30	4334126	ADA2	GO:0003700	DNA binding transcription factor activity	molecular_function	4
TRINITY_DN10622_c0_g1	UNIPROTKB|Q75LL6	100	4.9e-30	4334126	ADA2	GO:0003713	transcription coactivator activity	molecular_function	5
TRINITY_DN10622_c0_g1	UNIPROTKB|Q75LL6	100	4.9e-30	4334126	ADA2	GO:0004402	histone acetyltransferase activity	molecular_function	11
TRINITY_DN10622_c0_g1	UNIPROTKB|Q75LL6	100	4.9e-30	4334126	ADA2	GO:0005634	nucleus	cellular_component	6
TRINITY_DN10622_c0_g1	UNIPROTKB|Q75LL6	100	4.9e-30	4334126	ADA2	GO:0006338	chromatin remodeling	biological_process	6
TRINITY_DN10622_c0_g1	UNIPROTKB|Q75LL6	100	4.9e-30	4334126	ADA2	GO:0006357	regulation of transcription by RNA polymerase II	biological_process	9
TRINITY_DN10622_c0_g1	UNIPROTKB|Q75LL6	100	4.9e-30	4334126	ADA2	GO:0035066	positive regulation of histone acetylation	biological_process	11
TRINITY_DN10622_c0_g2	UNIPROTKB|Q75LL6	100	2.6e-37	4334126	ADA2	GO:0003682	chromatin binding	molecular_function	4
TRINITY_DN10622_c0_g2	UNIPROTKB|Q75LL6	100	2.6e-37	4334126	ADA2	GO:0003700	DNA binding transcription factor activity	molecular_function	4
TRINITY_DN10622_c0_g2	UNIPROTKB|Q75LL6	100	2.6e-37	4334126	ADA2	GO:0003713	transcription coactivator activity	molecular_function	5
TRINITY_DN10622_c0_g2	UNIPROTKB|Q75LL6	100	2.6e-37	4334126	ADA2	GO:0004402	histone acetyltransferase activity	molecular_function	11
TRINITY_DN10622_c0_g2	UNIPROTKB|Q75LL6	100	2.6e-37	4334126	ADA2	GO:0005634	nucleus	cellular_component	6
TRINITY_DN10622_c0_g2	UNIPROTKB|Q75LL6	100	2.6e-37	4334126	ADA2	GO:0006338	chromatin remodeling	biological_process	6
TRINITY_DN10622_c0_g2	UNIPROTKB|Q75LL6	100	2.6e-37	4334126	ADA2	GO:0006357	regulation of transcription by RNA polymerase II	biological_process	9
TRINITY_DN10622_c0_g2	UNIPROTKB|Q75LL6	100	2.6e-37	4334126	ADA2	GO:0035066	positive regulation of histone acetylation	biological_process	11
TRINITY_DN10624_c0_g1	TAIR|locus:2196668	74.3	3.1e-22	840217	AT1G33230	GO:0003674	molecular_function	molecular_function	2
TRINITY_DN10624_c0_g1	TAIR|locus:2196668	74.3	3.1e-22	840217	AT1G33230	GO:0008150	biological_process	biological_process	2
TRINITY_DN1065_c0_g1	UNIPROTKB|I1KW78	100	1.1e-38	100801959	GLYMA_08G238100	GO:0004497	monooxygenase activity	molecular_function	5
TRINITY_DN10669_c0_g1	UNIPROTKB|Q5KDF0	74.4	1e-07	3258584	CNG04220	GO:0005829	cytosol	cellular_component	6
TRINITY_DN10669_c0_g1	UNIPROTKB|Q5KDF0	74.4	1e-07	3258584	CNG04220	GO:0005886	plasma membrane	cellular_component	4
TRINITY_DN10669_c0_g1	UNIPROTKB|Q5KDF0	74.4	1e-07	3258584	CNG04220	GO:0008289	lipid binding	molecular_function	4
TRINITY_DN1067_c0_g1	ZFIN|ZDB-GENE-040426-2592	100	7e-43	406619	nnt	GO:0005743	mitochondrial inner membrane	cellular_component	6
TRINITY_DN1067_c0_g1	ZFIN|ZDB-GENE-040426-2592	100	7e-43	406619	nnt	GO:0006740	NADPH regeneration	biological_process	6
TRINITY_DN1067_c0_g1	ZFIN|ZDB-GENE-040426-2592	100	7e-43	406619	nnt	GO:0008746	NAD(P)+ transhydrogenase activity	molecular_function	7
TRINITY_DN1067_c0_g1	ZFIN|ZDB-GENE-040426-2592	100	7e-43	406619	nnt	GO:0008750	NAD(P)+ transhydrogenase (AB-specific) activity	molecular_function	8
TRINITY_DN1067_c0_g1	ZFIN|ZDB-GENE-040426-2592	100	7e-43	406619	nnt	GO:0016020	membrane	cellular_component	3
TRINITY_DN1067_c0_g1	ZFIN|ZDB-GENE-040426-2592	100	7e-43	406619	nnt	GO:0016021	integral component of membrane	cellular_component	5
TRINITY_DN1067_c0_g1	ZFIN|ZDB-GENE-040426-2592	100	7e-43	406619	nnt	GO:0016491	oxidoreductase activity	molecular_function	4
TRINITY_DN1067_c0_g1	ZFIN|ZDB-GENE-040426-2592	100	7e-43	406619	nnt	GO:0050661	NADP binding	molecular_function	6
TRINITY_DN1067_c0_g1	ZFIN|ZDB-GENE-040426-2592	100	7e-43	406619	nnt	GO:0051287	NAD binding	molecular_function	6
TRINITY_DN1067_c0_g1	ZFIN|ZDB-GENE-040426-2592	100	7e-43	406619	nnt	GO:0055114	oxidation-reduction process	biological_process	4
TRINITY_DN10680_c0_g1	UNIPROTKB|I1JUR9	100	1.1e-20	100801697	GLYMA_04G080200	GO:0005765	lysosomal membrane	cellular_component	9
TRINITY_DN10680_c0_g1	UNIPROTKB|I1JUR9	100	1.1e-20	100801697	GLYMA_04G080200	GO:0006465	signal peptide processing	biological_process	8
TRINITY_DN10680_c0_g1	UNIPROTKB|I1JUR9	100	1.1e-20	100801697	GLYMA_04G080200	GO:0030660	Golgi-associated vesicle membrane	cellular_component	7
TRINITY_DN10680_c0_g1	UNIPROTKB|I1JUR9	100	1.1e-20	100801697	GLYMA_04G080200	GO:0033619	membrane protein proteolysis	biological_process	8
TRINITY_DN10680_c0_g1	UNIPROTKB|I1JUR9	100	1.1e-20	100801697	GLYMA_04G080200	GO:0042500	aspartic endopeptidase activity, intramembrane cleaving	molecular_function	9
TRINITY_DN10680_c0_g1	UNIPROTKB|I1JUR9	100	1.1e-20	100801697	GLYMA_04G080200	GO:0071458	integral component of cytoplasmic side of endoplasmic reticulum membrane	cellular_component	8
TRINITY_DN10680_c0_g1	UNIPROTKB|I1JUR9	100	1.1e-20	100801697	GLYMA_04G080200	GO:0071556	integral component of lumenal side of endoplasmic reticulum membrane	cellular_component	8
TRINITY_DN106_c0_g1	UNIPROTKB|Q943I6	97.5	1.3e-13	4324940	LOC_Os01g65080	GO:0005634	nucleus	cellular_component	6
TRINITY_DN10717_c0_g3	ZFIN|ZDB-GENE-030131-1390	100	9.4e-54	-	aco2	GO:0003994	aconitate hydratase activity	molecular_function	7
TRINITY_DN10717_c0_g3	ZFIN|ZDB-GENE-030131-1390	100	9.4e-54	-	aco2	GO:0005739	mitochondrion	cellular_component	6
TRINITY_DN10717_c0_g3	ZFIN|ZDB-GENE-030131-1390	100	9.4e-54	-	aco2	GO:0006099	tricarboxylic acid cycle	biological_process	5
TRINITY_DN10717_c0_g3	ZFIN|ZDB-GENE-030131-1390	100	9.4e-54	-	aco2	GO:0008152	metabolic process	biological_process	3
TRINITY_DN10717_c0_g3	ZFIN|ZDB-GENE-030131-1390	100	9.4e-54	-	aco2	GO:0016829	lyase activity	molecular_function	4
TRINITY_DN10717_c0_g3	ZFIN|ZDB-GENE-030131-1390	100	9.4e-54	-	aco2	GO:0046872	metal ion binding	molecular_function	6
TRINITY_DN10717_c0_g3	ZFIN|ZDB-GENE-030131-1390	100	9.4e-54	-	aco2	GO:0051536	iron-sulfur cluster binding	molecular_function	5
TRINITY_DN10717_c0_g3	ZFIN|ZDB-GENE-030131-1390	100	9.4e-54	-	aco2	GO:0051539	4 iron, 4 sulfur cluster binding	molecular_function	6
TRINITY_DN1072_c0_g1	TAIR|locus:2144608	62.5	2.1e-12	831769	SBE2.2	GO:0003844	1,4-alpha-glucan branching enzyme activity	molecular_function	7
TRINITY_DN1072_c0_g1	TAIR|locus:2144608	62.5	2.1e-12	831769	SBE2.2	GO:0004553	hydrolase activity, hydrolyzing O-glycosyl compounds	molecular_function	6
TRINITY_DN1072_c0_g1	TAIR|locus:2144608	62.5	2.1e-12	831769	SBE2.2	GO:0005978	glycogen biosynthetic process	biological_process	10
TRINITY_DN1072_c0_g1	TAIR|locus:2144608	62.5	2.1e-12	831769	SBE2.2	GO:0005982	starch metabolic process	biological_process	9
TRINITY_DN1072_c0_g1	TAIR|locus:2144608	62.5	2.1e-12	831769	SBE2.2	GO:0009501	amyloplast	cellular_component	7
TRINITY_DN1072_c0_g1	TAIR|locus:2144608	62.5	2.1e-12	831769	SBE2.2	GO:0009507	chloroplast	cellular_component	7
TRINITY_DN1072_c0_g1	TAIR|locus:2144608	62.5	2.1e-12	831769	SBE2.2	GO:0009570	chloroplast stroma	cellular_component	8
TRINITY_DN1072_c0_g1	TAIR|locus:2144608	62.5	2.1e-12	831769	SBE2.2	GO:0010021	amylopectin biosynthetic process	biological_process	7
TRINITY_DN1072_c0_g1	TAIR|locus:2144608	62.5	2.1e-12	831769	SBE2.2	GO:0019252	starch biosynthetic process	biological_process	10
TRINITY_DN1072_c0_g1	TAIR|locus:2144608	62.5	2.1e-12	831769	SBE2.2	GO:0043169	cation binding	molecular_function	5
TRINITY_DN1072_c0_g1	TAIR|locus:2144608	62.5	2.1e-12	831769	SBE2.2	GO:0102752	1,4-alpha-glucan branching enzyme activity (using a glucosylated glycogenin as primer for glycogen synthesis)	molecular_function	7
TRINITY_DN10764_c0_g1	ZFIN|ZDB-GENE-030828-1	100	7.5e-44	-	glud1b	GO:0005575	cellular_component	cellular_component	2
TRINITY_DN10764_c0_g1	ZFIN|ZDB-GENE-030828-1	100	7.5e-44	-	glud1b	GO:0006520	cellular amino acid metabolic process	biological_process	8
TRINITY_DN10764_c0_g1	ZFIN|ZDB-GENE-030828-1	100	7.5e-44	-	glud1b	GO:0016491	oxidoreductase activity	molecular_function	4
TRINITY_DN10764_c0_g1	ZFIN|ZDB-GENE-030828-1	100	7.5e-44	-	glud1b	GO:0016639	oxidoreductase activity, acting on the CH-NH2 group of donors, NAD or NADP as acceptor	molecular_function	6
TRINITY_DN10764_c0_g1	ZFIN|ZDB-GENE-030828-1	100	7.5e-44	-	glud1b	GO:0055114	oxidation-reduction process	biological_process	4
TRINITY_DN10772_c0_g1	UNIPROTKB|B9HDT1	51.9	4.1e-58	7479635	POPTR_0006s02990g	GO:0005634	nucleus	cellular_component	6
TRINITY_DN10772_c0_g1	UNIPROTKB|B9HDT1	51.9	4.1e-58	7479635	POPTR_0006s02990g	GO:0005737	cytoplasm	cellular_component	5
TRINITY_DN10772_c0_g1	UNIPROTKB|B9HDT1	51.9	4.1e-58	7479635	POPTR_0006s02990g	GO:0008408	3'-5' exonuclease activity	molecular_function	8
TRINITY_DN10778_c0_g1	TAIR|locus:2185093	71.2	9e-16	831729	AT5G02050	GO:0005739	mitochondrion	cellular_component	6
TRINITY_DN10778_c0_g1	TAIR|locus:2185093	71.2	9e-16	831729	AT5G02050	GO:0005759	mitochondrial matrix	cellular_component	7
TRINITY_DN10778_c0_g1	TAIR|locus:2185093	71.2	9e-16	831729	AT5G02050	GO:0008150	biological_process	biological_process	2
TRINITY_DN10779_c0_g1	UNIPROTKB|Q8P9N1	51.4	3.1e-11	1002268	yhdG	GO:0005887	integral component of plasma membrane	cellular_component	6
TRINITY_DN10779_c0_g1	UNIPROTKB|Q8P9N1	51.4	3.1e-11	1002268	yhdG	GO:0015179	L-amino acid transmembrane transporter activity	molecular_function	8
TRINITY_DN10779_c0_g1	UNIPROTKB|Q8P9N1	51.4	3.1e-11	1002268	yhdG	GO:0015297	antiporter activity	molecular_function	7
TRINITY_DN10811_c0_g1	UNIPROTKB|B9HVR8	61.6	4e-72	7459093	POPTR_0010s11290g	GO:0016491	oxidoreductase activity	molecular_function	4
TRINITY_DN10811_c0_g1	UNIPROTKB|B9HVR8	61.6	4e-72	7459093	POPTR_0010s11290g	GO:0055114	oxidation-reduction process	biological_process	4
TRINITY_DN10812_c0_g1	ASPGD|ASPL0000322216	55.3	5.4e-15	5996268	AO090120000280	GO:0000329	fungal-type vacuole membrane	cellular_component	9
TRINITY_DN10812_c0_g1	ASPGD|ASPL0000322216	55.3	5.4e-15	5996268	AO090120000280	GO:0004035	alkaline phosphatase activity	molecular_function	8
TRINITY_DN10812_c0_g1	ASPGD|ASPL0000322216	55.3	5.4e-15	5996268	AO090120000280	GO:0005576	extracellular region	cellular_component	3
TRINITY_DN10812_c0_g1	ASPGD|ASPL0000322216	55.3	5.4e-15	5996268	AO090120000280	GO:0006470	protein dephosphorylation	biological_process	9
TRINITY_DN10812_c0_g1	ASPGD|ASPL0000322216	55.3	5.4e-15	5996268	AO090120000280	GO:0046496	nicotinamide nucleotide metabolic process	biological_process	9
TRINITY_DN10815_c0_g1	UNIPROTKB|P14854	100	7.6e-49	1340	COX6B1	GO:0004129	cytochrome-c oxidase activity	molecular_function	6
TRINITY_DN10815_c0_g1	UNIPROTKB|P14854	100	7.6e-49	1340	COX6B1	GO:0005739	mitochondrion	cellular_component	6
TRINITY_DN10815_c0_g1	UNIPROTKB|P14854	100	7.6e-49	1340	COX6B1	GO:0005743	mitochondrial inner membrane	cellular_component	6
TRINITY_DN10815_c0_g1	UNIPROTKB|P14854	100	7.6e-49	1340	COX6B1	GO:0005758	mitochondrial intermembrane space	cellular_component	6
TRINITY_DN10815_c0_g1	UNIPROTKB|P14854	100	7.6e-49	1340	COX6B1	GO:0006123	mitochondrial electron transport, cytochrome c to oxygen	biological_process	10
TRINITY_DN10815_c0_g1	UNIPROTKB|P14854	100	7.6e-49	1340	COX6B1	GO:0021762	substantia nigra development	biological_process	6
TRINITY_DN10815_c0_g1	UNIPROTKB|P14854	100	7.6e-49	1340	COX6B1	GO:1902600	proton transmembrane transport	biological_process	9
TRINITY_DN10830_c0_g1	UNIPROTKB|B9HQP9	73.3	9.5e-19	7491175	POPTR_0009s00990g	GO:0003756	protein disulfide isomerase activity	molecular_function	7
TRINITY_DN10830_c0_g1	UNIPROTKB|B9HQP9	73.3	9.5e-19	7491175	POPTR_0009s00990g	GO:0005783	endoplasmic reticulum	cellular_component	6
TRINITY_DN10830_c0_g1	UNIPROTKB|B9HQP9	73.3	9.5e-19	7491175	POPTR_0009s00990g	GO:0006457	protein folding	biological_process	4
TRINITY_DN10830_c0_g1	UNIPROTKB|B9HQP9	73.3	9.5e-19	7491175	POPTR_0009s00990g	GO:0034976	response to endoplasmic reticulum stress	biological_process	6
TRINITY_DN10832_c0_g1	TAIR|locus:2118661	52.1	5.9e-07	829162	AT4G30390	GO:0003674	molecular_function	molecular_function	2
TRINITY_DN10832_c0_g1	TAIR|locus:2118661	52.1	5.9e-07	829162	AT4G30390	GO:0005739	mitochondrion	cellular_component	6
TRINITY_DN10832_c0_g1	TAIR|locus:2118661	52.1	5.9e-07	829162	AT4G30390	GO:0008150	biological_process	biological_process	2
TRINITY_DN10839_c0_g1	ZFIN|ZDB-GENE-060929-1062	98.7	8.5e-39	767727	zgc:154045	GO:0003924	GTPase activity	molecular_function	9
TRINITY_DN10839_c0_g1	ZFIN|ZDB-GENE-060929-1062	98.7	8.5e-39	767727	zgc:154045	GO:0005525	GTP binding	molecular_function	8
TRINITY_DN10839_c0_g1	ZFIN|ZDB-GENE-060929-1062	98.7	8.5e-39	767727	zgc:154045	GO:0005769	early endosome	cellular_component	8
TRINITY_DN10839_c0_g1	ZFIN|ZDB-GENE-060929-1062	98.7	8.5e-39	767727	zgc:154045	GO:0030100	regulation of endocytosis	biological_process	7
TRINITY_DN10849_c0_g1	TAIR|locus:2139054	77.6	1.5e-26	826837	AT4G12280	GO:0005507	copper ion binding	molecular_function	8
TRINITY_DN10849_c0_g1	TAIR|locus:2139054	77.6	1.5e-26	826837	AT4G12280	GO:0005634	nucleus	cellular_component	6
TRINITY_DN10849_c0_g1	TAIR|locus:2139054	77.6	1.5e-26	826837	AT4G12280	GO:0008131	primary amine oxidase activity	molecular_function	7
TRINITY_DN10849_c0_g1	TAIR|locus:2139054	77.6	1.5e-26	826837	AT4G12280	GO:0048038	quinone binding	molecular_function	5
TRINITY_DN10849_c0_g1	TAIR|locus:2139054	77.6	1.5e-26	826837	AT4G12280	GO:0055114	oxidation-reduction process	biological_process	4
TRINITY_DN10852_c0_g1	ZFIN|ZDB-GENE-030131-4424	86.5	1e-19	-	glipr2	GO:0005576	extracellular region	cellular_component	3
TRINITY_DN10868_c0_g2	ZFIN|ZDB-GENE-030616-318	69.8	1.1e-36	368993	si:busm1-194e12.11	GO:0006955	immune response	biological_process	4
TRINITY_DN10868_c0_g2	ZFIN|ZDB-GENE-030616-318	69.8	1.1e-36	368993	si:busm1-194e12.11	GO:0016020	membrane	cellular_component	3
TRINITY_DN10868_c0_g2	ZFIN|ZDB-GENE-030616-318	69.8	1.1e-36	368993	si:busm1-194e12.11	GO:0016021	integral component of membrane	cellular_component	5
TRINITY_DN10868_c0_g2	ZFIN|ZDB-GENE-030616-318	69.8	1.1e-36	368993	si:busm1-194e12.11	GO:0019882	antigen processing and presentation	biological_process	4
TRINITY_DN10868_c0_g2	ZFIN|ZDB-GENE-030616-318	69.8	1.1e-36	368993	si:busm1-194e12.11	GO:0042613	MHC class II protein complex	cellular_component	7
TRINITY_DN10868_c0_g3	ZFIN|ZDB-GENE-030131-7449	75	1.1e-102	335509	zgc:113912	GO:0006955	immune response	biological_process	4
TRINITY_DN10868_c0_g3	ZFIN|ZDB-GENE-030131-7449	75	1.1e-102	335509	zgc:113912	GO:0016020	membrane	cellular_component	3
TRINITY_DN10868_c0_g3	ZFIN|ZDB-GENE-030131-7449	75	1.1e-102	335509	zgc:113912	GO:0016021	integral component of membrane	cellular_component	5
TRINITY_DN10868_c0_g3	ZFIN|ZDB-GENE-030131-7449	75	1.1e-102	335509	zgc:113912	GO:0019882	antigen processing and presentation	biological_process	4
TRINITY_DN10868_c0_g3	ZFIN|ZDB-GENE-030131-7449	75	1.1e-102	335509	zgc:113912	GO:0042613	MHC class II protein complex	cellular_component	7
TRINITY_DN10871_c0_g1	UNIPROTKB|F6H2A5	53.2	4.8e-21	-	VIT_19s0014g04240	GO:0004674	protein serine/threonine kinase activity	molecular_function	8
TRINITY_DN10871_c0_g1	UNIPROTKB|F6H2A5	53.2	4.8e-21	-	VIT_19s0014g04240	GO:0005886	plasma membrane	cellular_component	4
TRINITY_DN10871_c0_g1	UNIPROTKB|F6H2A5	53.2	4.8e-21	-	VIT_19s0014g04240	GO:0006468	protein phosphorylation	biological_process	9
TRINITY_DN10871_c0_g1	UNIPROTKB|F6H2A5	53.2	4.8e-21	-	VIT_19s0014g04240	GO:0006952	defense response	biological_process	5
TRINITY_DN10871_c0_g1	UNIPROTKB|F6H2A5	53.2	4.8e-21	-	VIT_19s0014g04240	GO:0009506	plasmodesma	cellular_component	5
TRINITY_DN10880_c0_g1	UNIPROTKB|K4B2X7	52.3	1.6e-17	101251420	K4B2X7	GO:0003725	double-stranded RNA binding	molecular_function	7
TRINITY_DN10880_c0_g1	UNIPROTKB|K4B2X7	52.3	1.6e-17	101251420	K4B2X7	GO:0004860	protein kinase inhibitor activity	molecular_function	7
TRINITY_DN10880_c0_g1	UNIPROTKB|K4B2X7	52.3	1.6e-17	101251420	K4B2X7	GO:0005730	nucleolus	cellular_component	6
TRINITY_DN10880_c0_g1	UNIPROTKB|K4B2X7	52.3	1.6e-17	101251420	K4B2X7	GO:0006469	negative regulation of protein kinase activity	biological_process	11
TRINITY_DN10880_c0_g1	UNIPROTKB|K4B2X7	52.3	1.6e-17	101251420	K4B2X7	GO:0019901	protein kinase binding	molecular_function	7
TRINITY_DN10888_c0_g1	TAIR|locus:2117313	69.2	1.1e-69	828616	PMSR4	GO:0005739	mitochondrion	cellular_component	6
TRINITY_DN10888_c0_g1	TAIR|locus:2117313	69.2	1.1e-69	828616	PMSR4	GO:0006464	cellular protein modification process	biological_process	8
TRINITY_DN10888_c0_g1	TAIR|locus:2117313	69.2	1.1e-69	828616	PMSR4	GO:0008113	peptide-methionine (S)-S-oxide reductase activity	molecular_function	7
TRINITY_DN10888_c0_g1	TAIR|locus:2117313	69.2	1.1e-69	828616	PMSR4	GO:0009416	response to light stimulus	biological_process	6
TRINITY_DN10888_c0_g1	TAIR|locus:2117313	69.2	1.1e-69	828616	PMSR4	GO:0009507	chloroplast	cellular_component	7
TRINITY_DN10888_c0_g1	TAIR|locus:2117313	69.2	1.1e-69	828616	PMSR4	GO:0009570	chloroplast stroma	cellular_component	8
TRINITY_DN10888_c0_g1	TAIR|locus:2117313	69.2	1.1e-69	828616	PMSR4	GO:0009735	response to cytokinin	biological_process	6
TRINITY_DN10888_c0_g1	TAIR|locus:2117313	69.2	1.1e-69	828616	PMSR4	GO:0009941	chloroplast envelope	cellular_component	7
TRINITY_DN10888_c0_g1	TAIR|locus:2117313	69.2	1.1e-69	828616	PMSR4	GO:0010114	response to red light	biological_process	8
TRINITY_DN10888_c0_g1	TAIR|locus:2117313	69.2	1.1e-69	828616	PMSR4	GO:0010218	response to far red light	biological_process	8
TRINITY_DN10888_c0_g1	TAIR|locus:2117313	69.2	1.1e-69	828616	PMSR4	GO:0034599	cellular response to oxidative stress	biological_process	6
TRINITY_DN10888_c0_g1	TAIR|locus:2117313	69.2	1.1e-69	828616	PMSR4	GO:0055114	oxidation-reduction process	biological_process	4
TRINITY_DN1088_c0_g1	UNIPROTKB|P62303	100	5.1e-32	396180	SNRPE	GO:0000387	spliceosomal snRNP assembly	biological_process	9
TRINITY_DN1088_c0_g1	UNIPROTKB|P62303	100	5.1e-32	396180	SNRPE	GO:0003723	RNA binding	molecular_function	6
TRINITY_DN1088_c0_g1	UNIPROTKB|P62303	100	5.1e-32	396180	SNRPE	GO:0005682	U5 snRNP	cellular_component	8
TRINITY_DN1088_c0_g1	UNIPROTKB|P62303	100	5.1e-32	396180	SNRPE	GO:0005683	U7 snRNP	cellular_component	7
TRINITY_DN1088_c0_g1	UNIPROTKB|P62303	100	5.1e-32	396180	SNRPE	GO:0005685	U1 snRNP	cellular_component	8
TRINITY_DN1088_c0_g1	UNIPROTKB|P62303	100	5.1e-32	396180	SNRPE	GO:0005686	U2 snRNP	cellular_component	8
TRINITY_DN1088_c0_g1	UNIPROTKB|P62303	100	5.1e-32	396180	SNRPE	GO:0005687	U4 snRNP	cellular_component	8
TRINITY_DN1088_c0_g1	UNIPROTKB|P62303	100	5.1e-32	396180	SNRPE	GO:0005689	U12-type spliceosomal complex	cellular_component	7
TRINITY_DN1088_c0_g1	UNIPROTKB|P62303	100	5.1e-32	396180	SNRPE	GO:0005697	telomerase holoenzyme complex	cellular_component	6
TRINITY_DN1088_c0_g1	UNIPROTKB|P62303	100	5.1e-32	396180	SNRPE	GO:0005829	cytosol	cellular_component	6
TRINITY_DN1088_c0_g1	UNIPROTKB|P62303	100	5.1e-32	396180	SNRPE	GO:0034709	methylosome	cellular_component	6
TRINITY_DN1088_c0_g1	UNIPROTKB|P62303	100	5.1e-32	396180	SNRPE	GO:0034715	pICln-Sm protein complex	cellular_component	6
TRINITY_DN1088_c0_g1	UNIPROTKB|P62303	100	5.1e-32	396180	SNRPE	GO:0034719	SMN-Sm protein complex	cellular_component	6
TRINITY_DN1088_c0_g1	UNIPROTKB|P62303	100	5.1e-32	396180	SNRPE	GO:0046540	U4/U6 x U5 tri-snRNP complex	cellular_component	9
TRINITY_DN1088_c0_g1	UNIPROTKB|P62303	100	5.1e-32	396180	SNRPE	GO:0070062	extracellular exosome	cellular_component	7
TRINITY_DN1088_c0_g1	UNIPROTKB|P62303	100	5.1e-32	396180	SNRPE	GO:0071011	precatalytic spliceosome	cellular_component	7
TRINITY_DN1088_c0_g1	UNIPROTKB|P62303	100	5.1e-32	396180	SNRPE	GO:0071013	catalytic step 2 spliceosome	cellular_component	7
TRINITY_DN10890_c0_g1	TAIR|locus:2093387	89.7	3.5e-28	820860	ASPGB1	GO:0004067	asparaginase activity	molecular_function	7
TRINITY_DN10890_c0_g1	TAIR|locus:2093387	89.7	3.5e-28	820860	ASPGB1	GO:0005737	cytoplasm	cellular_component	5
TRINITY_DN10890_c0_g1	TAIR|locus:2093387	89.7	3.5e-28	820860	ASPGB1	GO:0006508	proteolysis	biological_process	7
TRINITY_DN10890_c0_g1	TAIR|locus:2093387	89.7	3.5e-28	820860	ASPGB1	GO:0006516	glycoprotein catabolic process	biological_process	8
TRINITY_DN10890_c0_g1	TAIR|locus:2093387	89.7	3.5e-28	820860	ASPGB1	GO:0008798	beta-aspartyl-peptidase activity	molecular_function	9
TRINITY_DN10892_c0_g1	TAIR|locus:2077392	74.3	2.3e-25	819972	AT3G07810	GO:0003723	RNA binding	molecular_function	6
TRINITY_DN10892_c0_g1	TAIR|locus:2077392	74.3	2.3e-25	819972	AT3G07810	GO:0003729	mRNA binding	molecular_function	7
TRINITY_DN10892_c0_g1	TAIR|locus:2077392	74.3	2.3e-25	819972	AT3G07810	GO:0005576	extracellular region	cellular_component	3
TRINITY_DN10904_c0_g1	UNIPROTKB|R4GIV8	100	1.6e-36	427021	LOC427134	GO:0005524	ATP binding	molecular_function	5
TRINITY_DN10904_c0_g1	UNIPROTKB|R4GIV8	100	1.6e-36	427021	LOC427134	GO:0005737	cytoplasm	cellular_component	5
TRINITY_DN10904_c0_g1	UNIPROTKB|R4GIV8	100	1.6e-36	427021	LOC427134	GO:0016567	protein ubiquitination	biological_process	11
TRINITY_DN10904_c0_g1	UNIPROTKB|R4GIV8	100	1.6e-36	427021	LOC427134	GO:0031625	ubiquitin protein ligase binding	molecular_function	7
TRINITY_DN10904_c0_g1	UNIPROTKB|R4GIV8	100	1.6e-36	427021	LOC427134	GO:0043161	proteasome-mediated ubiquitin-dependent protein catabolic process	biological_process	11
TRINITY_DN10904_c0_g1	UNIPROTKB|R4GIV8	100	1.6e-36	427021	LOC427134	GO:0061630	ubiquitin protein ligase activity	molecular_function	7
TRINITY_DN10909_c0_g1	TAIR|locus:2120150	29.5	1.1e-06	829925	AT4G37700	GO:0003674	molecular_function	molecular_function	2
TRINITY_DN10909_c0_g1	TAIR|locus:2120150	29.5	1.1e-06	829925	AT4G37700	GO:0005634	nucleus	cellular_component	6
TRINITY_DN10909_c0_g1	TAIR|locus:2120150	29.5	1.1e-06	829925	AT4G37700	GO:0008150	biological_process	biological_process	2
TRINITY_DN10910_c0_g1	ZFIN|ZDB-GENE-120813-6	94.6	3.4e-32	100003376	slc7a3b	GO:0003333	amino acid transmembrane transport	biological_process	11
TRINITY_DN10910_c0_g1	ZFIN|ZDB-GENE-120813-6	94.6	3.4e-32	100003376	slc7a3b	GO:0006865	amino acid transport	biological_process	10
TRINITY_DN10910_c0_g1	ZFIN|ZDB-GENE-120813-6	94.6	3.4e-32	100003376	slc7a3b	GO:0015171	amino acid transmembrane transporter activity	molecular_function	7
TRINITY_DN10910_c0_g1	ZFIN|ZDB-GENE-120813-6	94.6	3.4e-32	100003376	slc7a3b	GO:0016020	membrane	cellular_component	3
TRINITY_DN10910_c0_g1	ZFIN|ZDB-GENE-120813-6	94.6	3.4e-32	100003376	slc7a3b	GO:0016021	integral component of membrane	cellular_component	5
TRINITY_DN10910_c0_g1	ZFIN|ZDB-GENE-120813-6	94.6	3.4e-32	100003376	slc7a3b	GO:1902475	L-alpha-amino acid transmembrane transport	biological_process	12
TRINITY_DN10928_c0_g1	UNIPROTKB|P35268	100	3.7e-61	6146	RPL22	GO:0000184	nuclear-transcribed mRNA catabolic process, nonsense-mediated decay	biological_process	12
TRINITY_DN10928_c0_g1	UNIPROTKB|P35268	100	3.7e-61	6146	RPL22	GO:0002181	cytoplasmic translation	biological_process	9
TRINITY_DN10928_c0_g1	UNIPROTKB|P35268	100	3.7e-61	6146	RPL22	GO:0003723	RNA binding	molecular_function	6
TRINITY_DN10928_c0_g1	UNIPROTKB|P35268	100	3.7e-61	6146	RPL22	GO:0003735	structural constituent of ribosome	molecular_function	4
TRINITY_DN10928_c0_g1	UNIPROTKB|P35268	100	3.7e-61	6146	RPL22	GO:0005515	protein binding	molecular_function	4
TRINITY_DN10928_c0_g1	UNIPROTKB|P35268	100	3.7e-61	6146	RPL22	GO:0005634	nucleus	cellular_component	6
TRINITY_DN10928_c0_g1	UNIPROTKB|P35268	100	3.7e-61	6146	RPL22	GO:0005737	cytoplasm	cellular_component	5
TRINITY_DN10928_c0_g1	UNIPROTKB|P35268	100	3.7e-61	6146	RPL22	GO:0005829	cytosol	cellular_component	6
TRINITY_DN10928_c0_g1	UNIPROTKB|P35268	100	3.7e-61	6146	RPL22	GO:0005925	focal adhesion	cellular_component	7
TRINITY_DN10928_c0_g1	UNIPROTKB|P35268	100	3.7e-61	6146	RPL22	GO:0006364	rRNA processing	biological_process	11
TRINITY_DN10928_c0_g1	UNIPROTKB|P35268	100	3.7e-61	6146	RPL22	GO:0006412	translation	biological_process	8
TRINITY_DN10928_c0_g1	UNIPROTKB|P35268	100	3.7e-61	6146	RPL22	GO:0006413	translational initiation	biological_process	5
TRINITY_DN10928_c0_g1	UNIPROTKB|P35268	100	3.7e-61	6146	RPL22	GO:0006614	SRP-dependent cotranslational protein targeting to membrane	biological_process	14
TRINITY_DN10928_c0_g1	UNIPROTKB|P35268	100	3.7e-61	6146	RPL22	GO:0008201	heparin binding	molecular_function	6
TRINITY_DN10928_c0_g1	UNIPROTKB|P35268	100	3.7e-61	6146	RPL22	GO:0019083	viral transcription	biological_process	7
TRINITY_DN10928_c0_g1	UNIPROTKB|P35268	100	3.7e-61	6146	RPL22	GO:0022625	cytosolic large ribosomal subunit	cellular_component	8
TRINITY_DN10928_c0_g1	UNIPROTKB|P35268	100	3.7e-61	6146	RPL22	GO:0046632	alpha-beta T cell differentiation	biological_process	9
TRINITY_DN10928_c0_g1	UNIPROTKB|P35268	100	3.7e-61	6146	RPL22	GO:0070062	extracellular exosome	cellular_component	7
TRINITY_DN1092_c0_g1	UNIPROTKB|F2Z5D4	95.1	1.6e-28	-	SYNCRIP	GO:0000166	nucleotide binding	molecular_function	5
TRINITY_DN1092_c0_g1	UNIPROTKB|F2Z5D4	95.1	1.6e-28	-	SYNCRIP	GO:0001649	osteoblast differentiation	biological_process	6
TRINITY_DN1092_c0_g1	UNIPROTKB|F2Z5D4	95.1	1.6e-28	-	SYNCRIP	GO:0008143	poly(A) binding	molecular_function	9
TRINITY_DN1092_c0_g1	UNIPROTKB|F2Z5D4	95.1	1.6e-28	-	SYNCRIP	GO:0016020	membrane	cellular_component	3
TRINITY_DN1092_c0_g1	UNIPROTKB|F2Z5D4	95.1	1.6e-28	-	SYNCRIP	GO:0017148	negative regulation of translation	biological_process	10
TRINITY_DN1092_c0_g1	UNIPROTKB|F2Z5D4	95.1	1.6e-28	-	SYNCRIP	GO:0070934	CRD-mediated mRNA stabilization	biological_process	12
TRINITY_DN1092_c0_g1	UNIPROTKB|F2Z5D4	95.1	1.6e-28	-	SYNCRIP	GO:0070937	CRD-mediated mRNA stability complex	cellular_component	4
TRINITY_DN1092_c0_g1	UNIPROTKB|F2Z5D4	95.1	1.6e-28	-	SYNCRIP	GO:0071013	catalytic step 2 spliceosome	cellular_component	7
TRINITY_DN1092_c0_g1	UNIPROTKB|F2Z5D4	95.1	1.6e-28	-	SYNCRIP	GO:0071204	histone pre-mRNA 3'end processing complex	cellular_component	6
TRINITY_DN1092_c0_g1	UNIPROTKB|F2Z5D4	95.1	1.6e-28	-	SYNCRIP	GO:0071346	cellular response to interferon-gamma	biological_process	8
TRINITY_DN1092_c0_g1	UNIPROTKB|F2Z5D4	95.1	1.6e-28	-	SYNCRIP	GO:0097452	GAIT complex	cellular_component	4
TRINITY_DN10930_c0_g1	ZFIN|ZDB-GENE-030131-8561	71.7	6.5e-15	-	thy1	GO:0001525	angiogenesis	biological_process	5
TRINITY_DN10930_c0_g1	ZFIN|ZDB-GENE-030131-8561	71.7	6.5e-15	-	thy1	GO:0005096	GTPase activator activity	molecular_function	6
TRINITY_DN10930_c0_g1	ZFIN|ZDB-GENE-030131-8561	71.7	6.5e-15	-	thy1	GO:0005178	integrin binding	molecular_function	6
TRINITY_DN10930_c0_g1	ZFIN|ZDB-GENE-030131-8561	71.7	6.5e-15	-	thy1	GO:0006469	negative regulation of protein kinase activity	biological_process	11
TRINITY_DN10930_c0_g1	ZFIN|ZDB-GENE-030131-8561	71.7	6.5e-15	-	thy1	GO:0007010	cytoskeleton organization	biological_process	6
TRINITY_DN10930_c0_g1	ZFIN|ZDB-GENE-030131-8561	71.7	6.5e-15	-	thy1	GO:0007155	cell adhesion	biological_process	4
TRINITY_DN10930_c0_g1	ZFIN|ZDB-GENE-030131-8561	71.7	6.5e-15	-	thy1	GO:0019901	protein kinase binding	molecular_function	7
TRINITY_DN10930_c0_g1	ZFIN|ZDB-GENE-030131-8561	71.7	6.5e-15	-	thy1	GO:0030334	regulation of cell migration	biological_process	7
TRINITY_DN10930_c0_g1	ZFIN|ZDB-GENE-030131-8561	71.7	6.5e-15	-	thy1	GO:0030336	negative regulation of cell migration	biological_process	8
TRINITY_DN10930_c0_g1	ZFIN|ZDB-GENE-030131-8561	71.7	6.5e-15	-	thy1	GO:0030425	dendrite	cellular_component	6
TRINITY_DN10930_c0_g1	ZFIN|ZDB-GENE-030131-8561	71.7	6.5e-15	-	thy1	GO:0031362	anchored component of external side of plasma membrane	cellular_component	7
TRINITY_DN10930_c0_g1	ZFIN|ZDB-GENE-030131-8561	71.7	6.5e-15	-	thy1	GO:0034235	GPI anchor binding	molecular_function	7
TRINITY_DN10930_c0_g1	ZFIN|ZDB-GENE-030131-8561	71.7	6.5e-15	-	thy1	GO:0043209	myelin sheath	cellular_component	4
TRINITY_DN10930_c0_g1	ZFIN|ZDB-GENE-030131-8561	71.7	6.5e-15	-	thy1	GO:0045121	membrane raft	cellular_component	6
TRINITY_DN10930_c0_g1	ZFIN|ZDB-GENE-030131-8561	71.7	6.5e-15	-	thy1	GO:0046549	retinal cone cell development	biological_process	9
TRINITY_DN10930_c0_g1	ZFIN|ZDB-GENE-030131-8561	71.7	6.5e-15	-	thy1	GO:0048041	focal adhesion assembly	biological_process	9
TRINITY_DN10930_c0_g1	ZFIN|ZDB-GENE-030131-8561	71.7	6.5e-15	-	thy1	GO:0050771	negative regulation of axonogenesis	biological_process	10
TRINITY_DN10930_c0_g1	ZFIN|ZDB-GENE-030131-8561	71.7	6.5e-15	-	thy1	GO:0050852	T cell receptor signaling pathway	biological_process	8
TRINITY_DN10930_c0_g1	ZFIN|ZDB-GENE-030131-8561	71.7	6.5e-15	-	thy1	GO:0050870	positive regulation of T cell activation	biological_process	9
TRINITY_DN10930_c0_g1	ZFIN|ZDB-GENE-030131-8561	71.7	6.5e-15	-	thy1	GO:0051281	positive regulation of release of sequestered calcium ion into cytosol	biological_process	15
TRINITY_DN10932_c0_g1	UNIPROTKB|P07737	100	1.4e-66	5216	PFN1	GO:0000774	adenyl-nucleotide exchange factor activity	molecular_function	8
TRINITY_DN10932_c0_g1	UNIPROTKB|P07737	100	1.4e-66	5216	PFN1	GO:0001843	neural tube closure	biological_process	7
TRINITY_DN10932_c0_g1	UNIPROTKB|P07737	100	1.4e-66	5216	PFN1	GO:0003779	actin binding	molecular_function	6
TRINITY_DN10932_c0_g1	UNIPROTKB|P07737	100	1.4e-66	5216	PFN1	GO:0003785	actin monomer binding	molecular_function	7
TRINITY_DN10932_c0_g1	UNIPROTKB|P07737	100	1.4e-66	5216	PFN1	GO:0005102	receptor binding	molecular_function	5
TRINITY_DN10932_c0_g1	UNIPROTKB|P07737	100	1.4e-66	5216	PFN1	GO:0005515	protein binding	molecular_function	4
TRINITY_DN10932_c0_g1	UNIPROTKB|P07737	100	1.4e-66	5216	PFN1	GO:0005546	phosphatidylinositol-4,5-bisphosphate binding	molecular_function	9
TRINITY_DN10932_c0_g1	UNIPROTKB|P07737	100	1.4e-66	5216	PFN1	GO:0005634	nucleus	cellular_component	6
TRINITY_DN10932_c0_g1	UNIPROTKB|P07737	100	1.4e-66	5216	PFN1	GO:0005737	cytoplasm	cellular_component	5
TRINITY_DN10932_c0_g1	UNIPROTKB|P07737	100	1.4e-66	5216	PFN1	GO:0005829	cytosol	cellular_component	6
TRINITY_DN10932_c0_g1	UNIPROTKB|P07737	100	1.4e-66	5216	PFN1	GO:0005856	cytoskeleton	cellular_component	6
TRINITY_DN10932_c0_g1	UNIPROTKB|P07737	100	1.4e-66	5216	PFN1	GO:0005925	focal adhesion	cellular_component	7
TRINITY_DN10932_c0_g1	UNIPROTKB|P07737	100	1.4e-66	5216	PFN1	GO:0005938	cell cortex	cellular_component	7
TRINITY_DN10932_c0_g1	UNIPROTKB|P07737	100	1.4e-66	5216	PFN1	GO:0010634	positive regulation of epithelial cell migration	biological_process	9
TRINITY_DN10932_c0_g1	UNIPROTKB|P07737	100	1.4e-66	5216	PFN1	GO:0016020	membrane	cellular_component	3
TRINITY_DN10932_c0_g1	UNIPROTKB|P07737	100	1.4e-66	5216	PFN1	GO:0017048	Rho GTPase binding	molecular_function	9
TRINITY_DN10932_c0_g1	UNIPROTKB|P07737	100	1.4e-66	5216	PFN1	GO:0030036	actin cytoskeleton organization	biological_process	7
TRINITY_DN10932_c0_g1	UNIPROTKB|P07737	100	1.4e-66	5216	PFN1	GO:0030837	negative regulation of actin filament polymerization	biological_process	9
TRINITY_DN10932_c0_g1	UNIPROTKB|P07737	100	1.4e-66	5216	PFN1	GO:0030838	positive regulation of actin filament polymerization	biological_process	9
TRINITY_DN10932_c0_g1	UNIPROTKB|P07737	100	1.4e-66	5216	PFN1	GO:0032232	negative regulation of actin filament bundle assembly	biological_process	7
TRINITY_DN10932_c0_g1	UNIPROTKB|P07737	100	1.4e-66	5216	PFN1	GO:0032233	positive regulation of actin filament bundle assembly	biological_process	7
TRINITY_DN10932_c0_g1	UNIPROTKB|P07737	100	1.4e-66	5216	PFN1	GO:0032781	positive regulation of ATPase activity	biological_process	8
TRINITY_DN10932_c0_g1	UNIPROTKB|P07737	100	1.4e-66	5216	PFN1	GO:0043005	neuron projection	cellular_component	5
TRINITY_DN10932_c0_g1	UNIPROTKB|P07737	100	1.4e-66	5216	PFN1	GO:0045202	synapse	cellular_component	3
TRINITY_DN10932_c0_g1	UNIPROTKB|P07737	100	1.4e-66	5216	PFN1	GO:0045944	positive regulation of transcription by RNA polymerase II	biological_process	10
TRINITY_DN10932_c0_g1	UNIPROTKB|P07737	100	1.4e-66	5216	PFN1	GO:0050434	positive regulation of viral transcription	biological_process	9
TRINITY_DN10932_c0_g1	UNIPROTKB|P07737	100	1.4e-66	5216	PFN1	GO:0050821	protein stabilization	biological_process	6
TRINITY_DN10932_c0_g1	UNIPROTKB|P07737	100	1.4e-66	5216	PFN1	GO:0051054	positive regulation of DNA metabolic process	biological_process	8
TRINITY_DN10932_c0_g1	UNIPROTKB|P07737	100	1.4e-66	5216	PFN1	GO:0051496	positive regulation of stress fiber assembly	biological_process	8
TRINITY_DN10932_c0_g1	UNIPROTKB|P07737	100	1.4e-66	5216	PFN1	GO:0051497	negative regulation of stress fiber assembly	biological_process	8
TRINITY_DN10932_c0_g1	UNIPROTKB|P07737	100	1.4e-66	5216	PFN1	GO:0060071	Wnt signaling pathway, planar cell polarity pathway	biological_process	9
TRINITY_DN10932_c0_g1	UNIPROTKB|P07737	100	1.4e-66	5216	PFN1	GO:0070062	extracellular exosome	cellular_component	7
TRINITY_DN10932_c0_g1	UNIPROTKB|P07737	100	1.4e-66	5216	PFN1	GO:0070064	proline-rich region binding	molecular_function	5
TRINITY_DN10932_c0_g1	UNIPROTKB|P07737	100	1.4e-66	5216	PFN1	GO:0071363	cellular response to growth factor stimulus	biological_process	7
TRINITY_DN10932_c0_g1	UNIPROTKB|P07737	100	1.4e-66	5216	PFN1	GO:0072562	blood microparticle	cellular_component	4
TRINITY_DN10932_c0_g1	UNIPROTKB|P07737	100	1.4e-66	5216	PFN1	GO:1900029	positive regulation of ruffle assembly	biological_process	10
TRINITY_DN10959_c1_g1	ZFIN|ZDB-GENE-040426-1315	76.2	7.5e-38	-	hif1al	GO:0000976	transcription regulatory region sequence-specific DNA binding	molecular_function	8
TRINITY_DN10959_c1_g1	ZFIN|ZDB-GENE-040426-1315	76.2	7.5e-38	-	hif1al	GO:0000981	RNA polymerase II transcription factor activity, sequence-specific DNA binding	molecular_function	5
TRINITY_DN10959_c1_g1	ZFIN|ZDB-GENE-040426-1315	76.2	7.5e-38	-	hif1al	GO:0001654	eye development	biological_process	7
TRINITY_DN10959_c1_g1	ZFIN|ZDB-GENE-040426-1315	76.2	7.5e-38	-	hif1al	GO:0001666	response to hypoxia	biological_process	5
TRINITY_DN10959_c1_g1	ZFIN|ZDB-GENE-040426-1315	76.2	7.5e-38	-	hif1al	GO:0003700	DNA binding transcription factor activity	molecular_function	4
TRINITY_DN10959_c1_g1	ZFIN|ZDB-GENE-040426-1315	76.2	7.5e-38	-	hif1al	GO:0005634	nucleus	cellular_component	6
TRINITY_DN10959_c1_g1	ZFIN|ZDB-GENE-040426-1315	76.2	7.5e-38	-	hif1al	GO:0005667	transcription factor complex	cellular_component	4
TRINITY_DN10959_c1_g1	ZFIN|ZDB-GENE-040426-1315	76.2	7.5e-38	-	hif1al	GO:0005737	cytoplasm	cellular_component	5
TRINITY_DN10959_c1_g1	ZFIN|ZDB-GENE-040426-1315	76.2	7.5e-38	-	hif1al	GO:0006351	transcription, DNA-templated	biological_process	8
TRINITY_DN10959_c1_g1	ZFIN|ZDB-GENE-040426-1315	76.2	7.5e-38	-	hif1al	GO:0006355	regulation of transcription, DNA-templated	biological_process	8
TRINITY_DN10959_c1_g1	ZFIN|ZDB-GENE-040426-1315	76.2	7.5e-38	-	hif1al	GO:0008013	beta-catenin binding	molecular_function	5
TRINITY_DN10959_c1_g1	ZFIN|ZDB-GENE-040426-1315	76.2	7.5e-38	-	hif1al	GO:0014823	response to activity	biological_process	4
TRINITY_DN10959_c1_g1	ZFIN|ZDB-GENE-040426-1315	76.2	7.5e-38	-	hif1al	GO:0045944	positive regulation of transcription by RNA polymerase II	biological_process	10
TRINITY_DN10959_c1_g1	ZFIN|ZDB-GENE-040426-1315	76.2	7.5e-38	-	hif1al	GO:0046983	protein dimerization activity	molecular_function	5
TRINITY_DN10959_c1_g1	ZFIN|ZDB-GENE-040426-1315	76.2	7.5e-38	-	hif1al	GO:0051402	neuron apoptotic process	biological_process	7
TRINITY_DN10959_c1_g1	ZFIN|ZDB-GENE-040426-1315	76.2	7.5e-38	-	hif1al	GO:1990907	beta-catenin-TCF complex	cellular_component	7
TRINITY_DN10959_c1_g2	ZFIN|ZDB-GENE-040426-1315	100	4.8e-31	-	hif1al	GO:0000976	transcription regulatory region sequence-specific DNA binding	molecular_function	8
TRINITY_DN10959_c1_g2	ZFIN|ZDB-GENE-040426-1315	100	4.8e-31	-	hif1al	GO:0000981	RNA polymerase II transcription factor activity, sequence-specific DNA binding	molecular_function	5
TRINITY_DN10959_c1_g2	ZFIN|ZDB-GENE-040426-1315	100	4.8e-31	-	hif1al	GO:0001654	eye development	biological_process	7
TRINITY_DN10959_c1_g2	ZFIN|ZDB-GENE-040426-1315	100	4.8e-31	-	hif1al	GO:0001666	response to hypoxia	biological_process	5
TRINITY_DN10959_c1_g2	ZFIN|ZDB-GENE-040426-1315	100	4.8e-31	-	hif1al	GO:0003700	DNA binding transcription factor activity	molecular_function	4
TRINITY_DN10959_c1_g2	ZFIN|ZDB-GENE-040426-1315	100	4.8e-31	-	hif1al	GO:0005634	nucleus	cellular_component	6
TRINITY_DN10959_c1_g2	ZFIN|ZDB-GENE-040426-1315	100	4.8e-31	-	hif1al	GO:0005667	transcription factor complex	cellular_component	4
TRINITY_DN10959_c1_g2	ZFIN|ZDB-GENE-040426-1315	100	4.8e-31	-	hif1al	GO:0005737	cytoplasm	cellular_component	5
TRINITY_DN10959_c1_g2	ZFIN|ZDB-GENE-040426-1315	100	4.8e-31	-	hif1al	GO:0006351	transcription, DNA-templated	biological_process	8
TRINITY_DN10959_c1_g2	ZFIN|ZDB-GENE-040426-1315	100	4.8e-31	-	hif1al	GO:0006355	regulation of transcription, DNA-templated	biological_process	8
TRINITY_DN10959_c1_g2	ZFIN|ZDB-GENE-040426-1315	100	4.8e-31	-	hif1al	GO:0008013	beta-catenin binding	molecular_function	5
TRINITY_DN10959_c1_g2	ZFIN|ZDB-GENE-040426-1315	100	4.8e-31	-	hif1al	GO:0014823	response to activity	biological_process	4
TRINITY_DN10959_c1_g2	ZFIN|ZDB-GENE-040426-1315	100	4.8e-31	-	hif1al	GO:0045944	positive regulation of transcription by RNA polymerase II	biological_process	10
TRINITY_DN10959_c1_g2	ZFIN|ZDB-GENE-040426-1315	100	4.8e-31	-	hif1al	GO:0046983	protein dimerization activity	molecular_function	5
TRINITY_DN10959_c1_g2	ZFIN|ZDB-GENE-040426-1315	100	4.8e-31	-	hif1al	GO:0051402	neuron apoptotic process	biological_process	7
TRINITY_DN10959_c1_g2	ZFIN|ZDB-GENE-040426-1315	100	4.8e-31	-	hif1al	GO:1990907	beta-catenin-TCF complex	cellular_component	7
TRINITY_DN10986_c0_g2	ZFIN|ZDB-GENE-030131-688	100	1.9e-13	100000775	glula	GO:0000166	nucleotide binding	molecular_function	5
TRINITY_DN10986_c0_g2	ZFIN|ZDB-GENE-030131-688	100	1.9e-13	100000775	glula	GO:0003824	catalytic activity	molecular_function	3
TRINITY_DN10986_c0_g2	ZFIN|ZDB-GENE-030131-688	100	1.9e-13	100000775	glula	GO:0004356	glutamate-ammonia ligase activity	molecular_function	8
TRINITY_DN10986_c0_g2	ZFIN|ZDB-GENE-030131-688	100	1.9e-13	100000775	glula	GO:0005524	ATP binding	molecular_function	5
TRINITY_DN10986_c0_g2	ZFIN|ZDB-GENE-030131-688	100	1.9e-13	100000775	glula	GO:0006542	glutamine biosynthetic process	biological_process	12
TRINITY_DN10986_c0_g2	ZFIN|ZDB-GENE-030131-688	100	1.9e-13	100000775	glula	GO:0006807	nitrogen compound metabolic process	biological_process	4
TRINITY_DN10986_c0_g2	ZFIN|ZDB-GENE-030131-688	100	1.9e-13	100000775	glula	GO:0016874	ligase activity	molecular_function	4
TRINITY_DN1098_c0_g1	UNIPROTKB|C5Y0D6	57.6	4.3e-15	-	Sb04g030760	GO:0005737	cytoplasm	cellular_component	5
TRINITY_DN1098_c0_g1	UNIPROTKB|C5Y0D6	57.6	4.3e-15	-	Sb04g030760	GO:0008757	S-adenosylmethionine-dependent methyltransferase activity	molecular_function	7
TRINITY_DN1098_c0_g1	UNIPROTKB|C5Y0D6	57.6	4.3e-15	-	Sb04g030760	GO:0032259	methylation	biological_process	4
TRINITY_DN10991_c0_g1	TAIR|locus:2142130	77.3	4.3e-14	826977	AT4G13450	GO:0005739	mitochondrion	cellular_component	6
TRINITY_DN10991_c0_g1	TAIR|locus:2142130	77.3	4.3e-14	826977	AT4G13450	GO:0016787	hydrolase activity	molecular_function	4
TRINITY_DN11012_c0_g1	TAIR|locus:2180632	66.7	3e-10	832663	AT5G25940	GO:0003674	molecular_function	molecular_function	2
TRINITY_DN11012_c0_g1	TAIR|locus:2180632	66.7	3e-10	832663	AT5G25940	GO:0005739	mitochondrion	cellular_component	6
TRINITY_DN11012_c0_g1	TAIR|locus:2180632	66.7	3e-10	832663	AT5G25940	GO:0016021	integral component of membrane	cellular_component	5
TRINITY_DN11014_c0_g1	TAIR|locus:2043192	31.4	9.6e-07	817467	AT2G29180	GO:0003674	molecular_function	molecular_function	2
TRINITY_DN11014_c0_g1	TAIR|locus:2043192	31.4	9.6e-07	817467	AT2G29180	GO:0008150	biological_process	biological_process	2
TRINITY_DN11014_c0_g1	TAIR|locus:2043192	31.4	9.6e-07	817467	AT2G29180	GO:0009507	chloroplast	cellular_component	7
TRINITY_DN11014_c0_g1	TAIR|locus:2043192	31.4	9.6e-07	817467	AT2G29180	GO:0009535	chloroplast thylakoid membrane	cellular_component	8
TRINITY_DN11014_c0_g1	TAIR|locus:2043192	31.4	9.6e-07	817467	AT2G29180	GO:0016021	integral component of membrane	cellular_component	5
TRINITY_DN11032_c0_g1	ZFIN|ZDB-GENE-040827-3	100	2.4e-29	446117	sf3b1	GO:0000245	spliceosomal complex assembly	biological_process	9
TRINITY_DN11032_c0_g1	ZFIN|ZDB-GENE-040827-3	100	2.4e-29	446117	sf3b1	GO:0003729	mRNA binding	molecular_function	7
TRINITY_DN11032_c0_g1	ZFIN|ZDB-GENE-040827-3	100	2.4e-29	446117	sf3b1	GO:0005686	U2 snRNP	cellular_component	8
TRINITY_DN11032_c0_g1	ZFIN|ZDB-GENE-040827-3	100	2.4e-29	446117	sf3b1	GO:0005689	U12-type spliceosomal complex	cellular_component	7
TRINITY_DN11032_c0_g1	ZFIN|ZDB-GENE-040827-3	100	2.4e-29	446117	sf3b1	GO:0014032	neural crest cell development	biological_process	7
TRINITY_DN11032_c0_g1	ZFIN|ZDB-GENE-040827-3	100	2.4e-29	446117	sf3b1	GO:0030318	melanocyte differentiation	biological_process	7
TRINITY_DN11032_c0_g1	ZFIN|ZDB-GENE-040827-3	100	2.4e-29	446117	sf3b1	GO:0042981	regulation of apoptotic process	biological_process	8
TRINITY_DN11032_c0_g1	ZFIN|ZDB-GENE-040827-3	100	2.4e-29	446117	sf3b1	GO:0060216	definitive hemopoiesis	biological_process	8
TRINITY_DN11032_c0_g1	ZFIN|ZDB-GENE-040827-3	100	2.4e-29	446117	sf3b1	GO:0060218	hematopoietic stem cell differentiation	biological_process	7
TRINITY_DN11032_c0_g1	ZFIN|ZDB-GENE-040827-3	100	2.4e-29	446117	sf3b1	GO:0061515	myeloid cell development	biological_process	6
TRINITY_DN11032_c0_g1	ZFIN|ZDB-GENE-040827-3	100	2.4e-29	446117	sf3b1	GO:0071004	U2-type prespliceosome	cellular_component	8
TRINITY_DN11032_c0_g1	ZFIN|ZDB-GENE-040827-3	100	2.4e-29	446117	sf3b1	GO:0071013	catalytic step 2 spliceosome	cellular_component	7
TRINITY_DN11034_c0_g1	TAIR|locus:2095984	77	1.3e-91	825432	AT3G62580	GO:0003674	molecular_function	molecular_function	2
TRINITY_DN11034_c0_g1	TAIR|locus:2095984	77	1.3e-91	825432	AT3G62580	GO:0005783	endoplasmic reticulum	cellular_component	6
TRINITY_DN11034_c0_g1	TAIR|locus:2095984	77	1.3e-91	825432	AT3G62580	GO:0008150	biological_process	biological_process	2
TRINITY_DN11034_c0_g1	TAIR|locus:2095984	77	1.3e-91	825432	AT3G62580	GO:0009507	chloroplast	cellular_component	7
TRINITY_DN11039_c0_g1	ZFIN|ZDB-GENE-041210-200	83.6	3.7e-28	556459	fgd6	GO:0005089	Rho guanyl-nucleotide exchange factor activity	molecular_function	9
TRINITY_DN11039_c0_g1	ZFIN|ZDB-GENE-041210-200	83.6	3.7e-28	556459	fgd6	GO:0035023	regulation of Rho protein signal transduction	biological_process	11
TRINITY_DN11039_c0_g1	ZFIN|ZDB-GENE-041210-200	83.6	3.7e-28	556459	fgd6	GO:0046872	metal ion binding	molecular_function	6
TRINITY_DN11039_c0_g2	ZFIN|ZDB-GENE-041210-200	47.7	7.7e-16	556459	fgd6	GO:0005089	Rho guanyl-nucleotide exchange factor activity	molecular_function	9
TRINITY_DN11039_c0_g2	ZFIN|ZDB-GENE-041210-200	47.7	7.7e-16	556459	fgd6	GO:0035023	regulation of Rho protein signal transduction	biological_process	11
TRINITY_DN11039_c0_g2	ZFIN|ZDB-GENE-041210-200	47.7	7.7e-16	556459	fgd6	GO:0046872	metal ion binding	molecular_function	6
TRINITY_DN1103_c0_g1	UNIPROTKB|I1N9L7	100	4.9e-33	732610	GLYMA_19G160800	GO:0000162	tryptophan biosynthetic process	biological_process	11
TRINITY_DN1103_c0_g1	UNIPROTKB|I1N9L7	100	4.9e-33	732610	GLYMA_19G160800	GO:0004834	tryptophan synthase activity	molecular_function	7
TRINITY_DN1103_c0_g1	UNIPROTKB|I1N9L7	100	4.9e-33	732610	GLYMA_19G160800	GO:0005737	cytoplasm	cellular_component	5
TRINITY_DN1103_c0_g1	UNIPROTKB|I1N9L7	100	4.9e-33	732610	GLYMA_19G160800	GO:0009507	chloroplast	cellular_component	7
TRINITY_DN1103_c0_g1	UNIPROTKB|I1N9L7	100	4.9e-33	732610	GLYMA_19G160800	GO:0030170	pyridoxal phosphate binding	molecular_function	6
TRINITY_DN11041_c0_g1	TAIR|locus:2826180	75	5.1e-21	840069	ACBP6	GO:0000062	fatty-acyl-CoA binding	molecular_function	9
TRINITY_DN11041_c0_g1	TAIR|locus:2826180	75	5.1e-21	840069	ACBP6	GO:0001666	response to hypoxia	biological_process	5
TRINITY_DN11041_c0_g1	TAIR|locus:2826180	75	5.1e-21	840069	ACBP6	GO:0005737	cytoplasm	cellular_component	5
TRINITY_DN11041_c0_g1	TAIR|locus:2826180	75	5.1e-21	840069	ACBP6	GO:0005829	cytosol	cellular_component	6
TRINITY_DN11041_c0_g1	TAIR|locus:2826180	75	5.1e-21	840069	ACBP6	GO:0005886	plasma membrane	cellular_component	4
TRINITY_DN11041_c0_g1	TAIR|locus:2826180	75	5.1e-21	840069	ACBP6	GO:0006869	lipid transport	biological_process	7
TRINITY_DN11041_c0_g1	TAIR|locus:2826180	75	5.1e-21	840069	ACBP6	GO:0009409	response to cold	biological_process	5
TRINITY_DN11041_c0_g1	TAIR|locus:2826180	75	5.1e-21	840069	ACBP6	GO:0009646	response to absence of light	biological_process	8
TRINITY_DN11041_c0_g1	TAIR|locus:2826180	75	5.1e-21	840069	ACBP6	GO:0031210	phosphatidylcholine binding	molecular_function	6
TRINITY_DN11041_c0_g1	TAIR|locus:2826180	75	5.1e-21	840069	ACBP6	GO:0050826	response to freezing	biological_process	6
TRINITY_DN11045_c0_g1	TAIR|locus:2060469	58.2	1.5e-33	815977	SWIB2	GO:0003674	molecular_function	molecular_function	2
TRINITY_DN11045_c0_g1	TAIR|locus:2060469	58.2	1.5e-33	815977	SWIB2	GO:0005634	nucleus	cellular_component	6
TRINITY_DN11045_c0_g1	TAIR|locus:2060469	58.2	1.5e-33	815977	SWIB2	GO:0008150	biological_process	biological_process	2
TRINITY_DN11059_c0_g1	UNIPROTKB|I1KY83	100	8.9e-11	547888	GLYMA_08G316500	GO:0004683	calmodulin-dependent protein kinase activity	molecular_function	9
TRINITY_DN11059_c0_g1	UNIPROTKB|I1KY83	100	8.9e-11	547888	GLYMA_08G316500	GO:0005516	calmodulin binding	molecular_function	5
TRINITY_DN11059_c0_g1	UNIPROTKB|I1KY83	100	8.9e-11	547888	GLYMA_08G316500	GO:0005634	nucleus	cellular_component	6
TRINITY_DN11059_c0_g1	UNIPROTKB|I1KY83	100	8.9e-11	547888	GLYMA_08G316500	GO:0005737	cytoplasm	cellular_component	5
TRINITY_DN11059_c0_g1	UNIPROTKB|I1KY83	100	8.9e-11	547888	GLYMA_08G316500	GO:0009738	abscisic acid-activated signaling pathway	biological_process	6
TRINITY_DN11059_c0_g1	UNIPROTKB|I1KY83	100	8.9e-11	547888	GLYMA_08G316500	GO:0009931	calcium-dependent protein serine/threonine kinase activity	molecular_function	9
TRINITY_DN11059_c0_g1	UNIPROTKB|I1KY83	100	8.9e-11	547888	GLYMA_08G316500	GO:0018105	peptidyl-serine phosphorylation	biological_process	10
TRINITY_DN11059_c0_g1	UNIPROTKB|I1KY83	100	8.9e-11	547888	GLYMA_08G316500	GO:0035556	intracellular signal transduction	biological_process	5
TRINITY_DN11059_c0_g1	UNIPROTKB|I1KY83	100	8.9e-11	547888	GLYMA_08G316500	GO:0046777	protein autophosphorylation	biological_process	10
TRINITY_DN11065_c0_g1	UNIPROTKB|Q2R2Y6	98.7	1.1e-38	4350687	Os11g0545000	GO:0000154	rRNA modification	biological_process	12
TRINITY_DN11065_c0_g1	UNIPROTKB|Q2R2Y6	98.7	1.1e-38	4350687	Os11g0545000	GO:0030515	snoRNA binding	molecular_function	7
TRINITY_DN11065_c0_g1	UNIPROTKB|Q2R2Y6	98.7	1.1e-38	4350687	Os11g0545000	GO:0031428	box C/D snoRNP complex	cellular_component	6
TRINITY_DN11065_c0_g1	UNIPROTKB|Q2R2Y6	98.7	1.1e-38	4350687	Os11g0545000	GO:0032040	small-subunit processome	cellular_component	6
TRINITY_DN11079_c0_g1	UNIPROTKB|B9HHZ6	88	1.7e-42	7472468	POPTR_0008s07780g	GO:0000398	mRNA splicing, via spliceosome	biological_process	13
TRINITY_DN11079_c0_g1	UNIPROTKB|B9HHZ6	88	1.7e-42	7472468	POPTR_0008s07780g	GO:0000932	P-body	cellular_component	8
TRINITY_DN11079_c0_g1	UNIPROTKB|B9HHZ6	88	1.7e-42	7472468	POPTR_0008s07780g	GO:0003723	RNA binding	molecular_function	6
TRINITY_DN11079_c0_g1	UNIPROTKB|B9HHZ6	88	1.7e-42	7472468	POPTR_0008s07780g	GO:0005688	U6 snRNP	cellular_component	8
TRINITY_DN11079_c0_g1	UNIPROTKB|B9HHZ6	88	1.7e-42	7472468	POPTR_0008s07780g	GO:0005730	nucleolus	cellular_component	6
TRINITY_DN11079_c0_g1	UNIPROTKB|B9HHZ6	88	1.7e-42	7472468	POPTR_0008s07780g	GO:0005732	small nucleolar ribonucleoprotein complex	cellular_component	5
TRINITY_DN11079_c0_g1	UNIPROTKB|B9HHZ6	88	1.7e-42	7472468	POPTR_0008s07780g	GO:0030490	maturation of SSU-rRNA	biological_process	12
TRINITY_DN11079_c0_g1	UNIPROTKB|B9HHZ6	88	1.7e-42	7472468	POPTR_0008s07780g	GO:0046540	U4/U6 x U5 tri-snRNP complex	cellular_component	9
TRINITY_DN11100_c1_g1	UNIPROTKB|A9P7Y7	100	9.7e-10	7488094	POPTR_0016s07110g	GO:0000460	maturation of 5.8S rRNA	biological_process	12
TRINITY_DN11100_c1_g1	UNIPROTKB|A9P7Y7	100	9.7e-10	7488094	POPTR_0016s07110g	GO:0000470	maturation of LSU-rRNA	biological_process	12
TRINITY_DN11100_c1_g1	UNIPROTKB|A9P7Y7	100	9.7e-10	7488094	POPTR_0016s07110g	GO:0005730	nucleolus	cellular_component	6
TRINITY_DN11100_c1_g1	UNIPROTKB|A9P7Y7	100	9.7e-10	7488094	POPTR_0016s07110g	GO:0030687	preribosome, large subunit precursor	cellular_component	6
TRINITY_DN11144_c0_g1	UNIPROTKB|I1MEF2	100	2.9e-11	100810640	GLYMA_15G071600	GO:0000398	mRNA splicing, via spliceosome	biological_process	13
TRINITY_DN11144_c0_g1	UNIPROTKB|I1MEF2	100	2.9e-11	100810640	GLYMA_15G071600	GO:0005684	U2-type spliceosomal complex	cellular_component	7
TRINITY_DN11144_c0_g1	UNIPROTKB|I1MEF2	100	2.9e-11	100810640	GLYMA_15G071600	GO:0005686	U2 snRNP	cellular_component	8
TRINITY_DN11144_c0_g1	UNIPROTKB|I1MEF2	100	2.9e-11	100810640	GLYMA_15G071600	GO:0005689	U12-type spliceosomal complex	cellular_component	7
TRINITY_DN11144_c0_g1	UNIPROTKB|I1MEF2	100	2.9e-11	100810640	GLYMA_15G071600	GO:0071011	precatalytic spliceosome	cellular_component	7
TRINITY_DN11144_c0_g1	UNIPROTKB|I1MEF2	100	2.9e-11	100810640	GLYMA_15G071600	GO:0071013	catalytic step 2 spliceosome	cellular_component	7
TRINITY_DN11148_c0_g1	UNIPROTKB|I1JBE2	94.2	2.1e-36	100819776	GLYMA_02G010500	GO:0004004	ATP-dependent RNA helicase activity	molecular_function	11
TRINITY_DN11148_c0_g1	UNIPROTKB|I1JBE2	94.2	2.1e-36	100819776	GLYMA_02G010500	GO:0005634	nucleus	cellular_component	6
TRINITY_DN11148_c0_g1	UNIPROTKB|I1JBE2	94.2	2.1e-36	100819776	GLYMA_02G010500	GO:0005737	cytoplasm	cellular_component	5
TRINITY_DN11148_c0_g1	UNIPROTKB|I1JBE2	94.2	2.1e-36	100819776	GLYMA_02G010500	GO:0006396	RNA processing	biological_process	9
TRINITY_DN11176_c0_g1	UNIPROTKB|Q6Z8D9	100	4e-33	4330426	P0459B01.29	GO:0000712	resolution of meiotic recombination intermediates	biological_process	7
TRINITY_DN11176_c0_g1	UNIPROTKB|Q6Z8D9	100	4e-33	4330426	P0459B01.29	GO:0000819	sister chromatid segregation	biological_process	7
TRINITY_DN11176_c0_g1	UNIPROTKB|Q6Z8D9	100	4e-33	4330426	P0459B01.29	GO:0003918	DNA topoisomerase type II (ATP-hydrolyzing) activity	molecular_function	12
TRINITY_DN11176_c0_g1	UNIPROTKB|Q6Z8D9	100	4e-33	4330426	P0459B01.29	GO:0005634	nucleus	cellular_component	6
TRINITY_DN11176_c0_g1	UNIPROTKB|Q6Z8D9	100	4e-33	4330426	P0459B01.29	GO:0006265	DNA topological change	biological_process	8
TRINITY_DN11176_c0_g1	UNIPROTKB|Q6Z8D9	100	4e-33	4330426	P0459B01.29	GO:0006268	DNA unwinding involved in DNA replication	biological_process	10
TRINITY_DN11176_c0_g1	UNIPROTKB|Q6Z8D9	100	4e-33	4330426	P0459B01.29	GO:0006312	mitotic recombination	biological_process	9
TRINITY_DN11176_c0_g1	UNIPROTKB|Q6Z8D9	100	4e-33	4330426	P0459B01.29	GO:0009295	nucleoid	cellular_component	3
TRINITY_DN11176_c0_g1	UNIPROTKB|Q6Z8D9	100	4e-33	4330426	P0459B01.29	GO:0009330	DNA topoisomerase complex (ATP-hydrolyzing)	cellular_component	4
TRINITY_DN11176_c0_g1	UNIPROTKB|Q6Z8D9	100	4e-33	4330426	P0459B01.29	GO:0044774	mitotic DNA integrity checkpoint	biological_process	6
TRINITY_DN11176_c0_g2	UNIPROTKB|Q6Z8D9	100	1e-30	4330426	P0459B01.29	GO:0000712	resolution of meiotic recombination intermediates	biological_process	7
TRINITY_DN11176_c0_g2	UNIPROTKB|Q6Z8D9	100	1e-30	4330426	P0459B01.29	GO:0000819	sister chromatid segregation	biological_process	7
TRINITY_DN11176_c0_g2	UNIPROTKB|Q6Z8D9	100	1e-30	4330426	P0459B01.29	GO:0003918	DNA topoisomerase type II (ATP-hydrolyzing) activity	molecular_function	12
TRINITY_DN11176_c0_g2	UNIPROTKB|Q6Z8D9	100	1e-30	4330426	P0459B01.29	GO:0005634	nucleus	cellular_component	6
TRINITY_DN11176_c0_g2	UNIPROTKB|Q6Z8D9	100	1e-30	4330426	P0459B01.29	GO:0006265	DNA topological change	biological_process	8
TRINITY_DN11176_c0_g2	UNIPROTKB|Q6Z8D9	100	1e-30	4330426	P0459B01.29	GO:0006268	DNA unwinding involved in DNA replication	biological_process	10
TRINITY_DN11176_c0_g2	UNIPROTKB|Q6Z8D9	100	1e-30	4330426	P0459B01.29	GO:0006312	mitotic recombination	biological_process	9
TRINITY_DN11176_c0_g2	UNIPROTKB|Q6Z8D9	100	1e-30	4330426	P0459B01.29	GO:0009295	nucleoid	cellular_component	3
TRINITY_DN11176_c0_g2	UNIPROTKB|Q6Z8D9	100	1e-30	4330426	P0459B01.29	GO:0009330	DNA topoisomerase complex (ATP-hydrolyzing)	cellular_component	4
TRINITY_DN11176_c0_g2	UNIPROTKB|Q6Z8D9	100	1e-30	4330426	P0459B01.29	GO:0044774	mitotic DNA integrity checkpoint	biological_process	6
TRINITY_DN11177_c0_g1	ZFIN|ZDB-GENE-121214-215	73.5	1e-06	-	si:dkey-24p1.7	GO:0016020	membrane	cellular_component	3
TRINITY_DN11177_c0_g1	ZFIN|ZDB-GENE-121214-215	73.5	1e-06	-	si:dkey-24p1.7	GO:0016021	integral component of membrane	cellular_component	5
TRINITY_DN11178_c0_g1	TAIR|locus:2097320	82.6	4.9e-35	824130	BCAT3	GO:0003824	catalytic activity	molecular_function	3
TRINITY_DN11178_c0_g1	TAIR|locus:2097320	82.6	4.9e-35	824130	BCAT3	GO:0004084	branched-chain-amino-acid transaminase activity	molecular_function	7
TRINITY_DN11178_c0_g1	TAIR|locus:2097320	82.6	4.9e-35	824130	BCAT3	GO:0005829	cytosol	cellular_component	6
TRINITY_DN11178_c0_g1	TAIR|locus:2097320	82.6	4.9e-35	824130	BCAT3	GO:0009082	branched-chain amino acid biosynthetic process	biological_process	10
TRINITY_DN11178_c0_g1	TAIR|locus:2097320	82.6	4.9e-35	824130	BCAT3	GO:0009097	isoleucine biosynthetic process	biological_process	11
TRINITY_DN11178_c0_g1	TAIR|locus:2097320	82.6	4.9e-35	824130	BCAT3	GO:0009098	leucine biosynthetic process	biological_process	11
TRINITY_DN11178_c0_g1	TAIR|locus:2097320	82.6	4.9e-35	824130	BCAT3	GO:0009099	valine biosynthetic process	biological_process	11
TRINITY_DN11178_c0_g1	TAIR|locus:2097320	82.6	4.9e-35	824130	BCAT3	GO:0009507	chloroplast	cellular_component	7
TRINITY_DN11178_c0_g1	TAIR|locus:2097320	82.6	4.9e-35	824130	BCAT3	GO:0009570	chloroplast stroma	cellular_component	8
TRINITY_DN11178_c0_g1	TAIR|locus:2097320	82.6	4.9e-35	824130	BCAT3	GO:0052654	L-leucine transaminase activity	molecular_function	8
TRINITY_DN11178_c0_g1	TAIR|locus:2097320	82.6	4.9e-35	824130	BCAT3	GO:0052655	L-valine transaminase activity	molecular_function	8
TRINITY_DN11178_c0_g1	TAIR|locus:2097320	82.6	4.9e-35	824130	BCAT3	GO:0052656	L-isoleucine transaminase activity	molecular_function	8
TRINITY_DN11190_c0_g1	UNIPROTKB|H8WH74	40.5	6.3e-08	-	CBG24470	GO:0004674	protein serine/threonine kinase activity	molecular_function	8
TRINITY_DN11190_c0_g1	UNIPROTKB|H8WH74	40.5	6.3e-08	-	CBG24470	GO:0005634	nucleus	cellular_component	6
TRINITY_DN11190_c0_g1	UNIPROTKB|H8WH74	40.5	6.3e-08	-	CBG24470	GO:0005737	cytoplasm	cellular_component	5
TRINITY_DN11190_c0_g1	UNIPROTKB|H8WH74	40.5	6.3e-08	-	CBG24470	GO:0008360	regulation of cell shape	biological_process	8
TRINITY_DN11190_c0_g1	UNIPROTKB|H8WH74	40.5	6.3e-08	-	CBG24470	GO:0018105	peptidyl-serine phosphorylation	biological_process	10
TRINITY_DN1119_c0_g2	TAIR|locus:2005526	91.1	4e-36	829489	DHS2	GO:0003849	3-deoxy-7-phosphoheptulonate synthase activity	molecular_function	6
TRINITY_DN1119_c0_g2	TAIR|locus:2005526	91.1	4e-36	829489	DHS2	GO:0005515	protein binding	molecular_function	4
TRINITY_DN1119_c0_g2	TAIR|locus:2005526	91.1	4e-36	829489	DHS2	GO:0009073	aromatic amino acid family biosynthetic process	biological_process	10
TRINITY_DN1119_c0_g2	TAIR|locus:2005526	91.1	4e-36	829489	DHS2	GO:0009423	chorismate biosynthetic process	biological_process	10
TRINITY_DN1119_c0_g2	TAIR|locus:2005526	91.1	4e-36	829489	DHS2	GO:0009507	chloroplast	cellular_component	7
TRINITY_DN1119_c0_g2	TAIR|locus:2005526	91.1	4e-36	829489	DHS2	GO:0009534	chloroplast thylakoid	cellular_component	7
TRINITY_DN11215_c0_g1	UNIPROTKB|Q0DQL2	100	5e-42	-	Os03g0583700	GO:0005634	nucleus	cellular_component	6
TRINITY_DN11215_c0_g1	UNIPROTKB|Q0DQL2	100	5e-42	-	Os03g0583700	GO:0005737	cytoplasm	cellular_component	5
TRINITY_DN11215_c0_g1	UNIPROTKB|Q0DQL2	100	5e-42	-	Os03g0583700	GO:0043248	proteasome assembly	biological_process	8
TRINITY_DN11269_c0_g1	UNIPROTKB|I1LJ94	100	6.3e-09	100783125	GLYMA_11G113400	GO:0000325	plant-type vacuole	cellular_component	7
TRINITY_DN11269_c0_g1	UNIPROTKB|I1LJ94	100	6.3e-09	100783125	GLYMA_11G113400	GO:0007035	vacuolar acidification	biological_process	13
TRINITY_DN11269_c0_g1	UNIPROTKB|I1LJ94	100	6.3e-09	100783125	GLYMA_11G113400	GO:0015986	ATP synthesis coupled proton transport	biological_process	13
TRINITY_DN11269_c0_g1	UNIPROTKB|I1LJ94	100	6.3e-09	100783125	GLYMA_11G113400	GO:0016471	vacuolar proton-transporting V-type ATPase complex	cellular_component	7
TRINITY_DN11269_c0_g1	UNIPROTKB|I1LJ94	100	6.3e-09	100783125	GLYMA_11G113400	GO:0046961	proton-transporting ATPase activity, rotational mechanism	molecular_function	10
TRINITY_DN11269_c0_g1	UNIPROTKB|I1LJ94	100	6.3e-09	100783125	GLYMA_11G113400	GO:0051117	ATPase binding	molecular_function	6
TRINITY_DN11269_c0_g1	UNIPROTKB|I1LJ94	100	6.3e-09	100783125	GLYMA_11G113400	GO:0070072	vacuolar proton-transporting V-type ATPase complex assembly	biological_process	10
TRINITY_DN1131_c0_g1	TAIR|locus:2117129	78.5	5.8e-30	827630	AT4G18950	GO:0004672	protein kinase activity	molecular_function	7
TRINITY_DN1131_c0_g1	TAIR|locus:2117129	78.5	5.8e-30	827630	AT4G18950	GO:0004712	protein serine/threonine/tyrosine kinase activity	molecular_function	8
TRINITY_DN1131_c0_g1	TAIR|locus:2117129	78.5	5.8e-30	827630	AT4G18950	GO:0005524	ATP binding	molecular_function	5
TRINITY_DN1131_c0_g1	TAIR|locus:2117129	78.5	5.8e-30	827630	AT4G18950	GO:0005634	nucleus	cellular_component	6
TRINITY_DN1131_c0_g1	TAIR|locus:2117129	78.5	5.8e-30	827630	AT4G18950	GO:0005737	cytoplasm	cellular_component	5
TRINITY_DN1131_c0_g1	TAIR|locus:2117129	78.5	5.8e-30	827630	AT4G18950	GO:0005829	cytosol	cellular_component	6
TRINITY_DN1131_c0_g1	TAIR|locus:2117129	78.5	5.8e-30	827630	AT4G18950	GO:0005886	plasma membrane	cellular_component	4
TRINITY_DN1131_c0_g1	TAIR|locus:2117129	78.5	5.8e-30	827630	AT4G18950	GO:0006468	protein phosphorylation	biological_process	9
TRINITY_DN1131_c0_g1	TAIR|locus:2117129	78.5	5.8e-30	827630	AT4G18950	GO:0007229	integrin-mediated signaling pathway	biological_process	6
TRINITY_DN1131_c0_g1	TAIR|locus:2117129	78.5	5.8e-30	827630	AT4G18950	GO:0016301	kinase activity	molecular_function	6
TRINITY_DN11338_c0_g3	ZFIN|ZDB-GENE-040426-710	100	9.9e-37	394074	hnrnpl	GO:0003676	nucleic acid binding	molecular_function	5
TRINITY_DN11338_c0_g3	ZFIN|ZDB-GENE-040426-710	100	9.9e-37	394074	hnrnpl	GO:0003723	RNA binding	molecular_function	6
TRINITY_DN11338_c0_g3	ZFIN|ZDB-GENE-040426-710	100	9.9e-37	394074	hnrnpl	GO:0005634	nucleus	cellular_component	6
TRINITY_DN11338_c0_g3	ZFIN|ZDB-GENE-040426-710	100	9.9e-37	394074	hnrnpl	GO:0006397	mRNA processing	biological_process	10
TRINITY_DN11394_c0_g1	ZFIN|ZDB-GENE-040426-1526	93.7	8.8e-39	393551	cyba	GO:0005886	plasma membrane	cellular_component	4
TRINITY_DN11394_c0_g1	ZFIN|ZDB-GENE-040426-1526	93.7	8.8e-39	393551	cyba	GO:0016020	membrane	cellular_component	3
TRINITY_DN11394_c0_g1	ZFIN|ZDB-GENE-040426-1526	93.7	8.8e-39	393551	cyba	GO:0016021	integral component of membrane	cellular_component	5
TRINITY_DN11394_c0_g1	ZFIN|ZDB-GENE-040426-1526	93.7	8.8e-39	393551	cyba	GO:0016175	superoxide-generating NADPH oxidase activity	molecular_function	7
TRINITY_DN11394_c0_g1	ZFIN|ZDB-GENE-040426-1526	93.7	8.8e-39	393551	cyba	GO:0016491	oxidoreductase activity	molecular_function	4
TRINITY_DN11394_c0_g1	ZFIN|ZDB-GENE-040426-1526	93.7	8.8e-39	393551	cyba	GO:0020037	heme binding	molecular_function	6
TRINITY_DN11394_c0_g1	ZFIN|ZDB-GENE-040426-1526	93.7	8.8e-39	393551	cyba	GO:0042554	superoxide anion generation	biological_process	7
TRINITY_DN11394_c0_g1	ZFIN|ZDB-GENE-040426-1526	93.7	8.8e-39	393551	cyba	GO:0043020	NADPH oxidase complex	cellular_component	6
TRINITY_DN11394_c0_g1	ZFIN|ZDB-GENE-040426-1526	93.7	8.8e-39	393551	cyba	GO:0046872	metal ion binding	molecular_function	6
TRINITY_DN11394_c0_g1	ZFIN|ZDB-GENE-040426-1526	93.7	8.8e-39	393551	cyba	GO:0048246	macrophage chemotaxis	biological_process	6
TRINITY_DN11394_c0_g1	ZFIN|ZDB-GENE-040426-1526	93.7	8.8e-39	393551	cyba	GO:0055114	oxidation-reduction process	biological_process	4
TRINITY_DN11394_c0_g1	ZFIN|ZDB-GENE-040426-1526	93.7	8.8e-39	393551	cyba	GO:1990266	neutrophil migration	biological_process	7
TRINITY_DN11397_c0_g1	ZFIN|ZDB-GENE-030131-7310	93.3	4.6e-42	335370	eef1b2	GO:0003746	translation elongation factor activity	molecular_function	8
TRINITY_DN11397_c0_g1	ZFIN|ZDB-GENE-030131-7310	93.3	4.6e-42	335370	eef1b2	GO:0005853	eukaryotic translation elongation factor 1 complex	cellular_component	4
TRINITY_DN11397_c0_g1	ZFIN|ZDB-GENE-030131-7310	93.3	4.6e-42	335370	eef1b2	GO:0006412	translation	biological_process	8
TRINITY_DN11397_c0_g1	ZFIN|ZDB-GENE-030131-7310	93.3	4.6e-42	335370	eef1b2	GO:0006414	translational elongation	biological_process	8
TRINITY_DN11397_c0_g2	ZFIN|ZDB-GENE-030131-7310	95	2.6e-16	335370	eef1b2	GO:0003746	translation elongation factor activity	molecular_function	8
TRINITY_DN11397_c0_g2	ZFIN|ZDB-GENE-030131-7310	95	2.6e-16	335370	eef1b2	GO:0005853	eukaryotic translation elongation factor 1 complex	cellular_component	4
TRINITY_DN11397_c0_g2	ZFIN|ZDB-GENE-030131-7310	95	2.6e-16	335370	eef1b2	GO:0006412	translation	biological_process	8
TRINITY_DN11397_c0_g2	ZFIN|ZDB-GENE-030131-7310	95	2.6e-16	335370	eef1b2	GO:0006414	translational elongation	biological_process	8
TRINITY_DN11439_c0_g1	TAIR|locus:2128238	78.8	4.4e-23	826724	BTI2	GO:0005634	nucleus	cellular_component	6
TRINITY_DN11439_c0_g1	TAIR|locus:2128238	78.8	4.4e-23	826724	BTI2	GO:0005783	endoplasmic reticulum	cellular_component	6
TRINITY_DN11439_c0_g1	TAIR|locus:2128238	78.8	4.4e-23	826724	BTI2	GO:0005789	endoplasmic reticulum membrane	cellular_component	5
TRINITY_DN11439_c0_g1	TAIR|locus:2128238	78.8	4.4e-23	826724	BTI2	GO:0005794	Golgi apparatus	cellular_component	6
TRINITY_DN11439_c0_g1	TAIR|locus:2128238	78.8	4.4e-23	826724	BTI2	GO:0005886	plasma membrane	cellular_component	4
TRINITY_DN11439_c0_g1	TAIR|locus:2128238	78.8	4.4e-23	826724	BTI2	GO:0071458	integral component of cytoplasmic side of endoplasmic reticulum membrane	cellular_component	8
TRINITY_DN11439_c0_g1	TAIR|locus:2128238	78.8	4.4e-23	826724	BTI2	GO:0071782	endoplasmic reticulum tubular network	cellular_component	7
TRINITY_DN11439_c0_g1	TAIR|locus:2128238	78.8	4.4e-23	826724	BTI2	GO:0071786	endoplasmic reticulum tubular network organization	biological_process	7
TRINITY_DN11441_c0_g1	UNIPROTKB|C5Z6E1	88.6	5e-30	-	Sb10g006870	GO:0004190	aspartic-type endopeptidase activity	molecular_function	8
TRINITY_DN11441_c0_g1	UNIPROTKB|C5Z6E1	88.6	5e-30	-	Sb10g006870	GO:0006508	proteolysis	biological_process	7
TRINITY_DN11441_c0_g1	UNIPROTKB|C5Z6E1	88.6	5e-30	-	Sb10g006870	GO:0030163	protein catabolic process	biological_process	7
TRINITY_DN1144_c0_g1	UNIPROTKB|O04226	100	9.5e-38	4338979	P5CS	GO:0004350	glutamate-5-semialdehyde dehydrogenase activity	molecular_function	7
TRINITY_DN1144_c0_g1	UNIPROTKB|O04226	100	9.5e-38	4338979	P5CS	GO:0005737	cytoplasm	cellular_component	5
TRINITY_DN1144_c0_g1	UNIPROTKB|O04226	100	9.5e-38	4338979	P5CS	GO:0006561	proline biosynthetic process	biological_process	12
TRINITY_DN11459_c0_g1	UNIPROTKB|F6H2U0	45.8	4.6e-19	-	VIT_04s0008g02170	GO:0003723	RNA binding	molecular_function	6
TRINITY_DN11459_c0_g1	UNIPROTKB|F6H2U0	45.8	4.6e-19	-	VIT_04s0008g02170	GO:0004525	ribonuclease III activity	molecular_function	10
TRINITY_DN11459_c0_g1	UNIPROTKB|F6H2U0	45.8	4.6e-19	-	VIT_04s0008g02170	GO:0005634	nucleus	cellular_component	6
TRINITY_DN11459_c0_g1	UNIPROTKB|F6H2U0	45.8	4.6e-19	-	VIT_04s0008g02170	GO:0005737	cytoplasm	cellular_component	5
TRINITY_DN11459_c0_g1	UNIPROTKB|F6H2U0	45.8	4.6e-19	-	VIT_04s0008g02170	GO:0016442	RISC complex	cellular_component	6
TRINITY_DN11459_c0_g1	UNIPROTKB|F6H2U0	45.8	4.6e-19	-	VIT_04s0008g02170	GO:0030422	production of siRNA involved in RNA interference	biological_process	12
TRINITY_DN11470_c0_g1	TAIR|locus:2037410	81.4	6.2e-28	838687	CDKB2;2	GO:0000082	G1/S transition of mitotic cell cycle	biological_process	7
TRINITY_DN11470_c0_g1	TAIR|locus:2037410	81.4	6.2e-28	838687	CDKB2;2	GO:0000307	cyclin-dependent protein kinase holoenzyme complex	cellular_component	5
TRINITY_DN11470_c0_g1	TAIR|locus:2037410	81.4	6.2e-28	838687	CDKB2;2	GO:0004674	protein serine/threonine kinase activity	molecular_function	8
TRINITY_DN11470_c0_g1	TAIR|locus:2037410	81.4	6.2e-28	838687	CDKB2;2	GO:0004693	cyclin-dependent protein serine/threonine kinase activity	molecular_function	9
TRINITY_DN11470_c0_g1	TAIR|locus:2037410	81.4	6.2e-28	838687	CDKB2;2	GO:0005515	protein binding	molecular_function	4
TRINITY_DN11470_c0_g1	TAIR|locus:2037410	81.4	6.2e-28	838687	CDKB2;2	GO:0005524	ATP binding	molecular_function	5
TRINITY_DN11470_c0_g1	TAIR|locus:2037410	81.4	6.2e-28	838687	CDKB2;2	GO:0005634	nucleus	cellular_component	6
TRINITY_DN11470_c0_g1	TAIR|locus:2037410	81.4	6.2e-28	838687	CDKB2;2	GO:0005737	cytoplasm	cellular_component	5
TRINITY_DN11470_c0_g1	TAIR|locus:2037410	81.4	6.2e-28	838687	CDKB2;2	GO:0007275	multicellular organism development	biological_process	4
TRINITY_DN11470_c0_g1	TAIR|locus:2037410	81.4	6.2e-28	838687	CDKB2;2	GO:0007346	regulation of mitotic cell cycle	biological_process	7
TRINITY_DN11470_c0_g1	TAIR|locus:2037410	81.4	6.2e-28	838687	CDKB2;2	GO:0008284	positive regulation of cell proliferation	biological_process	7
TRINITY_DN11470_c0_g1	TAIR|locus:2037410	81.4	6.2e-28	838687	CDKB2;2	GO:0008353	RNA polymerase II carboxy-terminal domain kinase activity	molecular_function	9
TRINITY_DN11470_c0_g1	TAIR|locus:2037410	81.4	6.2e-28	838687	CDKB2;2	GO:0009755	hormone-mediated signaling pathway	biological_process	5
TRINITY_DN11470_c0_g1	TAIR|locus:2037410	81.4	6.2e-28	838687	CDKB2;2	GO:0009934	regulation of meristem structural organization	biological_process	7
TRINITY_DN11470_c0_g1	TAIR|locus:2037410	81.4	6.2e-28	838687	CDKB2;2	GO:0010389	regulation of G2/M transition of mitotic cell cycle	biological_process	9
TRINITY_DN11470_c0_g1	TAIR|locus:2037410	81.4	6.2e-28	838687	CDKB2;2	GO:0010468	regulation of gene expression	biological_process	7
TRINITY_DN11470_c0_g1	TAIR|locus:2037410	81.4	6.2e-28	838687	CDKB2;2	GO:0016301	kinase activity	molecular_function	6
TRINITY_DN11470_c0_g1	TAIR|locus:2037410	81.4	6.2e-28	838687	CDKB2;2	GO:0030332	cyclin binding	molecular_function	5
TRINITY_DN11470_c0_g1	TAIR|locus:2037410	81.4	6.2e-28	838687	CDKB2;2	GO:0046777	protein autophosphorylation	biological_process	10
TRINITY_DN11503_c0_g1	TAIR|locus:2145613	46.8	2.9e-15	831273	AT5G14230	GO:0005737	cytoplasm	cellular_component	5
TRINITY_DN11503_c0_g1	TAIR|locus:2145613	46.8	2.9e-15	831273	AT5G14230	GO:0008150	biological_process	biological_process	2
TRINITY_DN11521_c0_g1	UNIPROTKB|Q5VQ77	100	4.3e-38	-	OSJNBa0007O20.8-2	GO:0006886	intracellular protein transport	biological_process	10
TRINITY_DN11521_c0_g1	UNIPROTKB|Q5VQ77	100	4.3e-38	-	OSJNBa0007O20.8-2	GO:0006888	ER to Golgi vesicle-mediated transport	biological_process	7
TRINITY_DN11521_c0_g1	UNIPROTKB|Q5VQ77	100	4.3e-38	-	OSJNBa0007O20.8-2	GO:0006890	retrograde vesicle-mediated transport, Golgi to ER	biological_process	8
TRINITY_DN11521_c0_g1	UNIPROTKB|Q5VQ77	100	4.3e-38	-	OSJNBa0007O20.8-2	GO:0006891	intra-Golgi vesicle-mediated transport	biological_process	8
TRINITY_DN11521_c0_g1	UNIPROTKB|Q5VQ77	100	4.3e-38	-	OSJNBa0007O20.8-2	GO:0030126	COPI vesicle coat	cellular_component	8
TRINITY_DN11532_c0_g1	UNIPROTKB|H2TCP2	56.2	6.1e-17	-	MAP4K1	GO:0005737	cytoplasm	cellular_component	5
TRINITY_DN11536_c0_g1	ZFIN|ZDB-GENE-131120-9	98.5	2.9e-35	559222	acvr1bb	GO:0000166	nucleotide binding	molecular_function	5
TRINITY_DN11536_c0_g1	ZFIN|ZDB-GENE-131120-9	98.5	2.9e-35	559222	acvr1bb	GO:0004672	protein kinase activity	molecular_function	7
TRINITY_DN11536_c0_g1	ZFIN|ZDB-GENE-131120-9	98.5	2.9e-35	559222	acvr1bb	GO:0004674	protein serine/threonine kinase activity	molecular_function	8
TRINITY_DN11536_c0_g1	ZFIN|ZDB-GENE-131120-9	98.5	2.9e-35	559222	acvr1bb	GO:0004675	transmembrane receptor protein serine/threonine kinase activity	molecular_function	9
TRINITY_DN11536_c0_g1	ZFIN|ZDB-GENE-131120-9	98.5	2.9e-35	559222	acvr1bb	GO:0005524	ATP binding	molecular_function	5
TRINITY_DN11536_c0_g1	ZFIN|ZDB-GENE-131120-9	98.5	2.9e-35	559222	acvr1bb	GO:0006468	protein phosphorylation	biological_process	9
TRINITY_DN11536_c0_g1	ZFIN|ZDB-GENE-131120-9	98.5	2.9e-35	559222	acvr1bb	GO:0007178	transmembrane receptor protein serine/threonine kinase signaling pathway	biological_process	7
TRINITY_DN11536_c0_g1	ZFIN|ZDB-GENE-131120-9	98.5	2.9e-35	559222	acvr1bb	GO:0016020	membrane	cellular_component	3
TRINITY_DN11536_c0_g1	ZFIN|ZDB-GENE-131120-9	98.5	2.9e-35	559222	acvr1bb	GO:0016021	integral component of membrane	cellular_component	5
TRINITY_DN11536_c0_g1	ZFIN|ZDB-GENE-131120-9	98.5	2.9e-35	559222	acvr1bb	GO:0016301	kinase activity	molecular_function	6
TRINITY_DN11536_c0_g1	ZFIN|ZDB-GENE-131120-9	98.5	2.9e-35	559222	acvr1bb	GO:0016310	phosphorylation	biological_process	7
TRINITY_DN11536_c0_g1	ZFIN|ZDB-GENE-131120-9	98.5	2.9e-35	559222	acvr1bb	GO:0016740	transferase activity	molecular_function	4
TRINITY_DN11546_c0_g1	TAIR|locus:2199461	57.1	1.1e-13	841900	ACP2	GO:0000035	acyl binding	molecular_function	4
TRINITY_DN11546_c0_g1	TAIR|locus:2199461	57.1	1.1e-13	841900	ACP2	GO:0000036	acyl carrier activity	molecular_function	7
TRINITY_DN11546_c0_g1	TAIR|locus:2199461	57.1	1.1e-13	841900	ACP2	GO:0005829	cytosol	cellular_component	6
TRINITY_DN11546_c0_g1	TAIR|locus:2199461	57.1	1.1e-13	841900	ACP2	GO:0006633	fatty acid biosynthetic process	biological_process	10
TRINITY_DN11546_c0_g1	TAIR|locus:2199461	57.1	1.1e-13	841900	ACP2	GO:0009245	lipid A biosynthetic process	biological_process	9
TRINITY_DN11546_c0_g1	TAIR|locus:2199461	57.1	1.1e-13	841900	ACP2	GO:0009507	chloroplast	cellular_component	7
TRINITY_DN11546_c0_g1	TAIR|locus:2199461	57.1	1.1e-13	841900	ACP2	GO:0031177	phosphopantetheine binding	molecular_function	6
TRINITY_DN11581_c0_g1	TAIR|locus:2033718	57.5	2.7e-19	840133	TOM2A	GO:0005515	protein binding	molecular_function	4
TRINITY_DN11581_c0_g1	TAIR|locus:2033718	57.5	2.7e-19	840133	TOM2A	GO:0005576	extracellular region	cellular_component	3
TRINITY_DN11581_c0_g1	TAIR|locus:2033718	57.5	2.7e-19	840133	TOM2A	GO:0005773	vacuole	cellular_component	6
TRINITY_DN11581_c0_g1	TAIR|locus:2033718	57.5	2.7e-19	840133	TOM2A	GO:0005794	Golgi apparatus	cellular_component	6
TRINITY_DN11581_c0_g1	TAIR|locus:2033718	57.5	2.7e-19	840133	TOM2A	GO:0009506	plasmodesma	cellular_component	5
TRINITY_DN11581_c0_g1	TAIR|locus:2033718	57.5	2.7e-19	840133	TOM2A	GO:0009705	plant-type vacuole membrane	cellular_component	8
TRINITY_DN11581_c0_g1	TAIR|locus:2033718	57.5	2.7e-19	840133	TOM2A	GO:0016020	membrane	cellular_component	3
TRINITY_DN11581_c0_g1	TAIR|locus:2033718	57.5	2.7e-19	840133	TOM2A	GO:0016021	integral component of membrane	cellular_component	5
TRINITY_DN11581_c0_g1	TAIR|locus:2033718	57.5	2.7e-19	840133	TOM2A	GO:0043621	protein self-association	molecular_function	5
TRINITY_DN11581_c0_g1	TAIR|locus:2033718	57.5	2.7e-19	840133	TOM2A	GO:0046786	viral replication complex formation and maintenance	biological_process	7
TRINITY_DN11620_c0_g1	UNIPROTKB|Q5Z7Y7	100	8.5e-39	4342038	Os06g0711600	GO:0000398	mRNA splicing, via spliceosome	biological_process	13
TRINITY_DN11620_c0_g1	UNIPROTKB|Q5Z7Y7	100	8.5e-39	4342038	Os06g0711600	GO:0000974	Prp19 complex	cellular_component	4
TRINITY_DN11620_c0_g1	UNIPROTKB|Q5Z7Y7	100	8.5e-39	4342038	Os06g0711600	GO:0071010	prespliceosome	cellular_component	7
TRINITY_DN11620_c0_g1	UNIPROTKB|Q5Z7Y7	100	8.5e-39	4342038	Os06g0711600	GO:0071012	catalytic step 1 spliceosome	cellular_component	7
TRINITY_DN11620_c0_g1	UNIPROTKB|Q5Z7Y7	100	8.5e-39	4342038	Os06g0711600	GO:0071013	catalytic step 2 spliceosome	cellular_component	7
TRINITY_DN11620_c0_g1	UNIPROTKB|Q5Z7Y7	100	8.5e-39	4342038	Os06g0711600	GO:0071014	post-mRNA release spliceosomal complex	cellular_component	7
TRINITY_DN11639_c0_g1	TAIR|locus:2042001	61.8	1.8e-07	817319	AT2G27730	GO:0005507	copper ion binding	molecular_function	8
TRINITY_DN11639_c0_g1	TAIR|locus:2042001	61.8	1.8e-07	817319	AT2G27730	GO:0005730	nucleolus	cellular_component	6
TRINITY_DN11639_c0_g1	TAIR|locus:2042001	61.8	1.8e-07	817319	AT2G27730	GO:0005739	mitochondrion	cellular_component	6
TRINITY_DN11639_c0_g1	TAIR|locus:2042001	61.8	1.8e-07	817319	AT2G27730	GO:0005747	mitochondrial respiratory chain complex I	cellular_component	7
TRINITY_DN11639_c0_g1	TAIR|locus:2042001	61.8	1.8e-07	817319	AT2G27730	GO:0005773	vacuole	cellular_component	6
TRINITY_DN11639_c0_g1	TAIR|locus:2042001	61.8	1.8e-07	817319	AT2G27730	GO:0009853	photorespiration	biological_process	6
TRINITY_DN11639_c0_g1	TAIR|locus:2042001	61.8	1.8e-07	817319	AT2G27730	GO:0031966	mitochondrial membrane	cellular_component	5
TRINITY_DN11639_c0_g1	TAIR|locus:2042001	61.8	1.8e-07	817319	AT2G27730	GO:0045271	respiratory chain complex I	cellular_component	6
TRINITY_DN11640_c0_g1	UNIPROTKB|Q8H5X5	81.8	5.5e-30	4343617	SCAMP1	GO:0005769	early endosome	cellular_component	8
TRINITY_DN11640_c0_g1	UNIPROTKB|Q8H5X5	81.8	5.5e-30	4343617	SCAMP1	GO:0005886	plasma membrane	cellular_component	4
TRINITY_DN11640_c0_g1	UNIPROTKB|Q8H5X5	81.8	5.5e-30	4343617	SCAMP1	GO:0006897	endocytosis	biological_process	7
TRINITY_DN11640_c0_g1	UNIPROTKB|Q8H5X5	81.8	5.5e-30	4343617	SCAMP1	GO:0006898	receptor-mediated endocytosis	biological_process	8
TRINITY_DN11644_c0_g1	ZFIN|ZDB-GENE-141216-19	65.9	1.5e-54	-	si:ch73-86n18.1	GO:0016020	membrane	cellular_component	3
TRINITY_DN11644_c0_g1	ZFIN|ZDB-GENE-141216-19	65.9	1.5e-54	-	si:ch73-86n18.1	GO:0016021	integral component of membrane	cellular_component	5
TRINITY_DN11644_c0_g1	ZFIN|ZDB-GENE-141216-19	65.9	1.5e-54	-	si:ch73-86n18.1	GO:0030246	carbohydrate binding	molecular_function	4
TRINITY_DN11660_c0_g1	UNIPROTKB|F6HHH1	90.2	6.9e-41	100242617	VIT_06s0080g00160	GO:0005634	nucleus	cellular_component	6
TRINITY_DN11660_c0_g1	UNIPROTKB|F6HHH1	90.2	6.9e-41	100242617	VIT_06s0080g00160	GO:0007033	vacuole organization	biological_process	6
TRINITY_DN11660_c0_g1	UNIPROTKB|F6HHH1	90.2	6.9e-41	100242617	VIT_06s0080g00160	GO:0008568	microtubule-severing ATPase activity	molecular_function	11
TRINITY_DN11660_c0_g1	UNIPROTKB|F6HHH1	90.2	6.9e-41	100242617	VIT_06s0080g00160	GO:0031122	cytoplasmic microtubule organization	biological_process	8
TRINITY_DN11668_c0_g1	ZFIN|ZDB-GENE-040426-1861	98.7	9.3e-37	-	dbi	GO:0000062	fatty-acyl-CoA binding	molecular_function	9
TRINITY_DN11668_c0_g1	ZFIN|ZDB-GENE-040426-1861	98.7	9.3e-37	-	dbi	GO:0005575	cellular_component	cellular_component	2
TRINITY_DN11668_c0_g1	ZFIN|ZDB-GENE-040426-1861	98.7	9.3e-37	-	dbi	GO:0008150	biological_process	biological_process	2
TRINITY_DN11670_c0_g1	ZFIN|ZDB-GENE-060526-374	82.2	4.6e-30	100002371	cyb561a3a	GO:0005764	lysosome	cellular_component	8
TRINITY_DN11670_c0_g1	ZFIN|ZDB-GENE-060526-374	82.2	4.6e-30	100002371	cyb561a3a	GO:0005765	lysosomal membrane	cellular_component	9
TRINITY_DN11670_c0_g1	ZFIN|ZDB-GENE-060526-374	82.2	4.6e-30	100002371	cyb561a3a	GO:0005768	endosome	cellular_component	7
TRINITY_DN11670_c0_g1	ZFIN|ZDB-GENE-060526-374	82.2	4.6e-30	100002371	cyb561a3a	GO:0016020	membrane	cellular_component	3
TRINITY_DN11670_c0_g1	ZFIN|ZDB-GENE-060526-374	82.2	4.6e-30	100002371	cyb561a3a	GO:0016021	integral component of membrane	cellular_component	5
TRINITY_DN11670_c0_g1	ZFIN|ZDB-GENE-060526-374	82.2	4.6e-30	100002371	cyb561a3a	GO:0016491	oxidoreductase activity	molecular_function	4
TRINITY_DN11670_c0_g1	ZFIN|ZDB-GENE-060526-374	82.2	4.6e-30	100002371	cyb561a3a	GO:0031902	late endosome membrane	cellular_component	9
TRINITY_DN11670_c0_g1	ZFIN|ZDB-GENE-060526-374	82.2	4.6e-30	100002371	cyb561a3a	GO:0046872	metal ion binding	molecular_function	6
TRINITY_DN11670_c0_g1	ZFIN|ZDB-GENE-060526-374	82.2	4.6e-30	100002371	cyb561a3a	GO:0055114	oxidation-reduction process	biological_process	4
TRINITY_DN11676_c0_g1	UNIPROTKB|Q75GA5	100	6.2e-34	4338163	TIP4-1	GO:0005887	integral component of plasma membrane	cellular_component	6
TRINITY_DN11676_c0_g1	UNIPROTKB|Q75GA5	100	6.2e-34	4338163	TIP4-1	GO:0009705	plant-type vacuole membrane	cellular_component	8
TRINITY_DN11676_c0_g1	UNIPROTKB|Q75GA5	100	6.2e-34	4338163	TIP4-1	GO:0009992	cellular water homeostasis	biological_process	8
TRINITY_DN11676_c0_g1	UNIPROTKB|Q75GA5	100	6.2e-34	4338163	TIP4-1	GO:0015250	water channel activity	molecular_function	7
TRINITY_DN11676_c0_g1	UNIPROTKB|Q75GA5	100	6.2e-34	4338163	TIP4-1	GO:0015254	glycerol channel activity	molecular_function	7
TRINITY_DN11676_c0_g1	UNIPROTKB|Q75GA5	100	6.2e-34	4338163	TIP4-1	GO:0034220	ion transmembrane transport	biological_process	7
TRINITY_DN11676_c0_g1	UNIPROTKB|Q75GA5	100	6.2e-34	4338163	TIP4-1	GO:0042807	central vacuole	cellular_component	8
TRINITY_DN11684_c0_g1	UNIPROTKB|Q95M59	84.2	1.4e-19	282392	UBQLN1	GO:0005654	nucleoplasm	cellular_component	6
TRINITY_DN11684_c0_g1	UNIPROTKB|Q95M59	84.2	1.4e-19	282392	UBQLN1	GO:0005776	autophagosome	cellular_component	7
TRINITY_DN11684_c0_g1	UNIPROTKB|Q95M59	84.2	1.4e-19	282392	UBQLN1	GO:0005783	endoplasmic reticulum	cellular_component	6
TRINITY_DN11684_c0_g1	UNIPROTKB|Q95M59	84.2	1.4e-19	282392	UBQLN1	GO:0005886	plasma membrane	cellular_component	4
TRINITY_DN11684_c0_g1	UNIPROTKB|Q95M59	84.2	1.4e-19	282392	UBQLN1	GO:0016235	aggresome	cellular_component	6
TRINITY_DN11684_c0_g1	UNIPROTKB|Q95M59	84.2	1.4e-19	282392	UBQLN1	GO:0019900	kinase binding	molecular_function	6
TRINITY_DN11684_c0_g1	UNIPROTKB|Q95M59	84.2	1.4e-19	282392	UBQLN1	GO:0030433	ubiquitin-dependent ERAD pathway	biological_process	8
TRINITY_DN11684_c0_g1	UNIPROTKB|Q95M59	84.2	1.4e-19	282392	UBQLN1	GO:0031398	positive regulation of protein ubiquitination	biological_process	11
TRINITY_DN11684_c0_g1	UNIPROTKB|Q95M59	84.2	1.4e-19	282392	UBQLN1	GO:0031593	polyubiquitin modification-dependent protein binding	molecular_function	6
TRINITY_DN11684_c0_g1	UNIPROTKB|Q95M59	84.2	1.4e-19	282392	UBQLN1	GO:0034140	negative regulation of toll-like receptor 3 signaling pathway	biological_process	8
TRINITY_DN11684_c0_g1	UNIPROTKB|Q95M59	84.2	1.4e-19	282392	UBQLN1	GO:0035973	aggrephagy	biological_process	9
TRINITY_DN11684_c0_g1	UNIPROTKB|Q95M59	84.2	1.4e-19	282392	UBQLN1	GO:0042802	identical protein binding	molecular_function	5
TRINITY_DN11684_c0_g1	UNIPROTKB|Q95M59	84.2	1.4e-19	282392	UBQLN1	GO:0048471	perinuclear region of cytoplasm	cellular_component	6
TRINITY_DN11684_c0_g1	UNIPROTKB|Q95M59	84.2	1.4e-19	282392	UBQLN1	GO:0071456	cellular response to hypoxia	biological_process	6
TRINITY_DN11684_c0_g1	UNIPROTKB|Q95M59	84.2	1.4e-19	282392	UBQLN1	GO:1901097	negative regulation of autophagosome maturation	biological_process	11
TRINITY_DN11684_c0_g1	UNIPROTKB|Q95M59	84.2	1.4e-19	282392	UBQLN1	GO:1901340	negative regulation of store-operated calcium channel activity	biological_process	9
TRINITY_DN11684_c0_g1	UNIPROTKB|Q95M59	84.2	1.4e-19	282392	UBQLN1	GO:1902175	regulation of oxidative stress-induced intrinsic apoptotic signaling pathway	biological_process	8
TRINITY_DN11684_c0_g1	UNIPROTKB|Q95M59	84.2	1.4e-19	282392	UBQLN1	GO:1903071	positive regulation of ER-associated ubiquitin-dependent protein catabolic process	biological_process	13
TRINITY_DN11684_c0_g1	UNIPROTKB|Q95M59	84.2	1.4e-19	282392	UBQLN1	GO:2000785	regulation of autophagosome assembly	biological_process	10
TRINITY_DN11701_c0_g1	POMBASE|SPAC4G9.16c	67.8	9.2e-16	2543380	rpl901	GO:0002181	cytoplasmic translation	biological_process	9
TRINITY_DN11701_c0_g1	POMBASE|SPAC4G9.16c	67.8	9.2e-16	2543380	rpl901	GO:0003735	structural constituent of ribosome	molecular_function	4
TRINITY_DN11701_c0_g1	POMBASE|SPAC4G9.16c	67.8	9.2e-16	2543380	rpl901	GO:0005634	nucleus	cellular_component	6
TRINITY_DN11701_c0_g1	POMBASE|SPAC4G9.16c	67.8	9.2e-16	2543380	rpl901	GO:0005829	cytosol	cellular_component	6
TRINITY_DN11701_c0_g1	POMBASE|SPAC4G9.16c	67.8	9.2e-16	2543380	rpl901	GO:0019843	rRNA binding	molecular_function	7
TRINITY_DN11701_c0_g1	POMBASE|SPAC4G9.16c	67.8	9.2e-16	2543380	rpl901	GO:0022625	cytosolic large ribosomal subunit	cellular_component	8
TRINITY_DN11706_c0_g1	TAIR|locus:2092492	65.8	6.6e-20	820428	CYSB	GO:0002020	protease binding	molecular_function	6
TRINITY_DN11706_c0_g1	TAIR|locus:2092492	65.8	6.6e-20	820428	CYSB	GO:0004869	cysteine-type endopeptidase inhibitor activity	molecular_function	8
TRINITY_DN11706_c0_g1	TAIR|locus:2092492	65.8	6.6e-20	820428	CYSB	GO:0005515	protein binding	molecular_function	4
TRINITY_DN11706_c0_g1	TAIR|locus:2092492	65.8	6.6e-20	820428	CYSB	GO:0005576	extracellular region	cellular_component	3
TRINITY_DN11706_c0_g1	TAIR|locus:2092492	65.8	6.6e-20	820428	CYSB	GO:0005783	endoplasmic reticulum	cellular_component	6
TRINITY_DN11706_c0_g1	TAIR|locus:2092492	65.8	6.6e-20	820428	CYSB	GO:0005829	cytosol	cellular_component	6
TRINITY_DN11706_c0_g1	TAIR|locus:2092492	65.8	6.6e-20	820428	CYSB	GO:0006952	defense response	biological_process	5
TRINITY_DN11706_c0_g1	TAIR|locus:2092492	65.8	6.6e-20	820428	CYSB	GO:0006972	hyperosmotic response	biological_process	6
TRINITY_DN11706_c0_g1	TAIR|locus:2092492	65.8	6.6e-20	820428	CYSB	GO:0006979	response to oxidative stress	biological_process	5
TRINITY_DN11706_c0_g1	TAIR|locus:2092492	65.8	6.6e-20	820428	CYSB	GO:0009409	response to cold	biological_process	5
TRINITY_DN11706_c0_g1	TAIR|locus:2092492	65.8	6.6e-20	820428	CYSB	GO:0009414	response to water deprivation	biological_process	5
TRINITY_DN11706_c0_g1	TAIR|locus:2092492	65.8	6.6e-20	820428	CYSB	GO:0050897	cobalt ion binding	molecular_function	8
TRINITY_DN11706_c0_g1	TAIR|locus:2092492	65.8	6.6e-20	820428	CYSB	GO:2000117	negative regulation of cysteine-type endopeptidase activity	biological_process	12
TRINITY_DN11711_c0_g3	ZFIN|ZDB-GENE-060929-704	97.4	1.4e-41	-	mbnl1	GO:0005575	cellular_component	cellular_component	2
TRINITY_DN11711_c0_g3	ZFIN|ZDB-GENE-060929-704	97.4	1.4e-41	-	mbnl1	GO:0008150	biological_process	biological_process	2
TRINITY_DN11711_c0_g3	ZFIN|ZDB-GENE-060929-704	97.4	1.4e-41	-	mbnl1	GO:0046872	metal ion binding	molecular_function	6
TRINITY_DN11745_c1_g1	ZFIN|ZDB-GENE-050208-64	100	3.5e-34	497348	matn4	GO:0000287	magnesium ion binding	molecular_function	7
TRINITY_DN11745_c1_g1	ZFIN|ZDB-GENE-050208-64	100	3.5e-34	497348	matn4	GO:0005509	calcium ion binding	molecular_function	7
TRINITY_DN11751_c0_g1	TAIR|locus:505006339	41.8	2.9e-07	820507	PRCE1	GO:0003674	molecular_function	molecular_function	2
TRINITY_DN11751_c0_g1	TAIR|locus:505006339	41.8	2.9e-07	820507	PRCE1	GO:0008150	biological_process	biological_process	2
TRINITY_DN11751_c0_g1	TAIR|locus:505006339	41.8	2.9e-07	820507	PRCE1	GO:0016021	integral component of membrane	cellular_component	5
TRINITY_DN11752_c0_g1	ZFIN|ZDB-GENE-040426-2178	98.5	1.9e-29	406432	akirin1	GO:0003674	molecular_function	molecular_function	2
TRINITY_DN11752_c0_g1	ZFIN|ZDB-GENE-040426-2178	98.5	1.9e-29	406432	akirin1	GO:0005575	cellular_component	cellular_component	2
TRINITY_DN11752_c0_g1	ZFIN|ZDB-GENE-040426-2178	98.5	1.9e-29	406432	akirin1	GO:0008150	biological_process	biological_process	2
TRINITY_DN11773_c0_g1	UNIPROTKB|D7TA79	78.2	9.2e-108	-	VIT_01s0010g00580	GO:0005634	nucleus	cellular_component	6
TRINITY_DN11782_c0_g1	UNIPROTKB|I1LIN4	100	5.9e-37	100305884	GLYMA_11G096700	GO:0009505	plant-type cell wall	cellular_component	6
TRINITY_DN11782_c0_g1	UNIPROTKB|I1LIN4	100	5.9e-37	100305884	GLYMA_11G096700	GO:0009506	plasmodesma	cellular_component	5
TRINITY_DN11782_c0_g1	UNIPROTKB|I1LIN4	100	5.9e-37	100305884	GLYMA_11G096700	GO:0016020	membrane	cellular_component	3
TRINITY_DN11815_c0_g1	TAIR|locus:2005709	71.3	6.5e-37	843893	SAUR51	GO:0005516	calmodulin binding	molecular_function	5
TRINITY_DN11815_c0_g1	TAIR|locus:2005709	71.3	6.5e-37	843893	SAUR51	GO:0005575	cellular_component	cellular_component	2
TRINITY_DN11815_c0_g1	TAIR|locus:2005709	71.3	6.5e-37	843893	SAUR51	GO:0009733	response to auxin	biological_process	6
TRINITY_DN11819_c0_g1	UNIPROTKB|C6JRR1	64.7	5.9e-34	-	Sb0012s014620	GO:0000719	photoreactive repair	biological_process	10
TRINITY_DN11819_c0_g1	UNIPROTKB|C6JRR1	64.7	5.9e-34	-	Sb0012s014620	GO:0003904	deoxyribodipyrimidine photo-lyase activity	molecular_function	7
TRINITY_DN11847_c0_g1	TAIR|locus:2007372	74.4	3.7e-30	837215	AT1G07040	GO:0008150	biological_process	biological_process	2
TRINITY_DN11847_c0_g1	TAIR|locus:2007372	74.4	3.7e-30	837215	AT1G07040	GO:0009507	chloroplast	cellular_component	7
TRINITY_DN11856_c0_g2	TAIR|locus:2138606	59.7	6.5e-19	826436	AT4G08690	GO:0005215	transporter activity	molecular_function	3
TRINITY_DN11856_c0_g2	TAIR|locus:2138606	59.7	6.5e-19	826436	AT4G08690	GO:0005634	nucleus	cellular_component	6
TRINITY_DN11856_c0_g2	TAIR|locus:2138606	59.7	6.5e-19	826436	AT4G08690	GO:0006810	transport	biological_process	5
TRINITY_DN11857_c0_g1	TAIR|locus:2053813	84.6	3.5e-28	818844	ASL15	GO:0005634	nucleus	cellular_component	6
TRINITY_DN11857_c0_g1	TAIR|locus:2053813	84.6	3.5e-28	818844	ASL15	GO:0008150	biological_process	biological_process	2
TRINITY_DN11863_c0_g1	ZFIN|ZDB-GENE-050320-139	92.9	1.1e-35	541435	acss1	GO:0000166	nucleotide binding	molecular_function	5
TRINITY_DN11863_c0_g1	ZFIN|ZDB-GENE-050320-139	92.9	1.1e-35	541435	acss1	GO:0003824	catalytic activity	molecular_function	3
TRINITY_DN11863_c0_g1	ZFIN|ZDB-GENE-050320-139	92.9	1.1e-35	541435	acss1	GO:0003987	acetate-CoA ligase activity	molecular_function	7
TRINITY_DN11863_c0_g1	ZFIN|ZDB-GENE-050320-139	92.9	1.1e-35	541435	acss1	GO:0005524	ATP binding	molecular_function	5
TRINITY_DN11863_c0_g1	ZFIN|ZDB-GENE-050320-139	92.9	1.1e-35	541435	acss1	GO:0005575	cellular_component	cellular_component	2
TRINITY_DN11863_c0_g1	ZFIN|ZDB-GENE-050320-139	92.9	1.1e-35	541435	acss1	GO:0008152	metabolic process	biological_process	3
TRINITY_DN11863_c0_g1	ZFIN|ZDB-GENE-050320-139	92.9	1.1e-35	541435	acss1	GO:0016208	AMP binding	molecular_function	5
TRINITY_DN11863_c0_g1	ZFIN|ZDB-GENE-050320-139	92.9	1.1e-35	541435	acss1	GO:0016874	ligase activity	molecular_function	4
TRINITY_DN11863_c0_g1	ZFIN|ZDB-GENE-050320-139	92.9	1.1e-35	541435	acss1	GO:0019427	acetyl-CoA biosynthetic process from acetate	biological_process	8
TRINITY_DN11873_c0_g1	UNIPROTKB|Q0J4A3	63.6	1.7e-07	-	Os08g0526400	GO:0005634	nucleus	cellular_component	6
TRINITY_DN11873_c0_g1	UNIPROTKB|Q0J4A3	63.6	1.7e-07	-	Os08g0526400	GO:0016567	protein ubiquitination	biological_process	11
TRINITY_DN11873_c0_g1	UNIPROTKB|Q0J4A3	63.6	1.7e-07	-	Os08g0526400	GO:0043161	proteasome-mediated ubiquitin-dependent protein catabolic process	biological_process	11
TRINITY_DN11873_c0_g1	UNIPROTKB|Q0J4A3	63.6	1.7e-07	-	Os08g0526400	GO:0061630	ubiquitin protein ligase activity	molecular_function	7
TRINITY_DN11876_c0_g1	UNIPROTKB|Q76I82	100	1.5e-70	337888	RPS15A	GO:0003735	structural constituent of ribosome	molecular_function	4
TRINITY_DN11876_c0_g1	UNIPROTKB|Q76I82	100	1.5e-70	337888	RPS15A	GO:0005739	mitochondrion	cellular_component	6
TRINITY_DN11876_c0_g1	UNIPROTKB|Q76I82	100	1.5e-70	337888	RPS15A	GO:0006412	translation	biological_process	8
TRINITY_DN11876_c0_g1	UNIPROTKB|Q76I82	100	1.5e-70	337888	RPS15A	GO:0008284	positive regulation of cell proliferation	biological_process	7
TRINITY_DN11876_c0_g1	UNIPROTKB|Q76I82	100	1.5e-70	337888	RPS15A	GO:0009615	response to virus	biological_process	7
TRINITY_DN11876_c0_g1	UNIPROTKB|Q76I82	100	1.5e-70	337888	RPS15A	GO:0016020	membrane	cellular_component	3
TRINITY_DN11876_c0_g1	UNIPROTKB|Q76I82	100	1.5e-70	337888	RPS15A	GO:0022627	cytosolic small ribosomal subunit	cellular_component	8
TRINITY_DN11876_c0_g1	UNIPROTKB|Q76I82	100	1.5e-70	337888	RPS15A	GO:0045787	positive regulation of cell cycle	biological_process	7
TRINITY_DN11876_c0_g1	UNIPROTKB|Q76I82	100	1.5e-70	337888	RPS15A	GO:0070062	extracellular exosome	cellular_component	7
TRINITY_DN11878_c0_g1	ZFIN|ZDB-GENE-070502-4	71.9	1e-30	100101653	fcer1gl	GO:0016020	membrane	cellular_component	3
TRINITY_DN11878_c0_g1	ZFIN|ZDB-GENE-070502-4	71.9	1e-30	100101653	fcer1gl	GO:0016021	integral component of membrane	cellular_component	5
TRINITY_DN11894_c0_g3	ZFIN|ZDB-GENE-040109-1	91.5	1.9e-29	394196	nop56	GO:0000154	rRNA modification	biological_process	12
TRINITY_DN11894_c0_g3	ZFIN|ZDB-GENE-040109-1	91.5	1.9e-29	394196	nop56	GO:0007507	heart development	biological_process	6
TRINITY_DN11894_c0_g3	ZFIN|ZDB-GENE-040109-1	91.5	1.9e-29	394196	nop56	GO:0030515	snoRNA binding	molecular_function	7
TRINITY_DN11894_c0_g3	ZFIN|ZDB-GENE-040109-1	91.5	1.9e-29	394196	nop56	GO:0031428	box C/D snoRNP complex	cellular_component	6
TRINITY_DN11894_c0_g3	ZFIN|ZDB-GENE-040109-1	91.5	1.9e-29	394196	nop56	GO:0032040	small-subunit processome	cellular_component	6
TRINITY_DN11898_c0_g1	TAIR|locus:505006606	57.6	3e-22	831113	ANNAT8	GO:0005509	calcium ion binding	molecular_function	7
TRINITY_DN11898_c0_g1	TAIR|locus:505006606	57.6	3e-22	831113	ANNAT8	GO:0005544	calcium-dependent phospholipid binding	molecular_function	6
TRINITY_DN11898_c0_g1	TAIR|locus:505006606	57.6	3e-22	831113	ANNAT8	GO:0005634	nucleus	cellular_component	6
TRINITY_DN11898_c0_g1	TAIR|locus:505006606	57.6	3e-22	831113	ANNAT8	GO:0009408	response to heat	biological_process	5
TRINITY_DN11898_c0_g1	TAIR|locus:505006606	57.6	3e-22	831113	ANNAT8	GO:0009409	response to cold	biological_process	5
TRINITY_DN11898_c0_g1	TAIR|locus:505006606	57.6	3e-22	831113	ANNAT8	GO:0009414	response to water deprivation	biological_process	5
TRINITY_DN11898_c0_g1	TAIR|locus:505006606	57.6	3e-22	831113	ANNAT8	GO:0009651	response to salt stress	biological_process	6
TRINITY_DN11898_c1_g1	TAIR|locus:505006606	55.2	9.3e-13	831113	ANNAT8	GO:0005509	calcium ion binding	molecular_function	7
TRINITY_DN11898_c1_g1	TAIR|locus:505006606	55.2	9.3e-13	831113	ANNAT8	GO:0005544	calcium-dependent phospholipid binding	molecular_function	6
TRINITY_DN11898_c1_g1	TAIR|locus:505006606	55.2	9.3e-13	831113	ANNAT8	GO:0005634	nucleus	cellular_component	6
TRINITY_DN11898_c1_g1	TAIR|locus:505006606	55.2	9.3e-13	831113	ANNAT8	GO:0009408	response to heat	biological_process	5
TRINITY_DN11898_c1_g1	TAIR|locus:505006606	55.2	9.3e-13	831113	ANNAT8	GO:0009409	response to cold	biological_process	5
TRINITY_DN11898_c1_g1	TAIR|locus:505006606	55.2	9.3e-13	831113	ANNAT8	GO:0009414	response to water deprivation	biological_process	5
TRINITY_DN11898_c1_g1	TAIR|locus:505006606	55.2	9.3e-13	831113	ANNAT8	GO:0009651	response to salt stress	biological_process	6
TRINITY_DN11921_c0_g1	ZFIN|ZDB-GENE-080107-7	64.4	6.4e-22	100135755	il6r	GO:0004896	cytokine receptor activity	molecular_function	6
TRINITY_DN11921_c0_g1	ZFIN|ZDB-GENE-080107-7	64.4	6.4e-22	100135755	il6r	GO:0016020	membrane	cellular_component	3
TRINITY_DN11921_c0_g1	ZFIN|ZDB-GENE-080107-7	64.4	6.4e-22	100135755	il6r	GO:0016021	integral component of membrane	cellular_component	5
TRINITY_DN11923_c0_g1	ZFIN|ZDB-GENE-071004-119	63.8	1.3e-19	100126125	zgc:174237	GO:0003674	molecular_function	molecular_function	2
TRINITY_DN11923_c0_g1	ZFIN|ZDB-GENE-071004-119	63.8	1.3e-19	100126125	zgc:174237	GO:0005575	cellular_component	cellular_component	2
TRINITY_DN11923_c0_g1	ZFIN|ZDB-GENE-071004-119	63.8	1.3e-19	100126125	zgc:174237	GO:0008150	biological_process	biological_process	2
TRINITY_DN11926_c0_g1	TAIR|locus:2195336	79.7	9e-30	837434	AT1G09150	GO:0003723	RNA binding	molecular_function	6
TRINITY_DN11926_c0_g1	TAIR|locus:2195336	79.7	9e-30	837434	AT1G09150	GO:0005737	cytoplasm	cellular_component	5
TRINITY_DN11926_c0_g1	TAIR|locus:2195336	79.7	9e-30	837434	AT1G09150	GO:0005829	cytosol	cellular_component	6
TRINITY_DN11926_c0_g1	TAIR|locus:2195336	79.7	9e-30	837434	AT1G09150	GO:0008150	biological_process	biological_process	2
TRINITY_DN11932_c0_g1	ZFIN|ZDB-GENE-030131-1565	86.1	1.3e-28	-	ddx3a	GO:0000166	nucleotide binding	molecular_function	5
TRINITY_DN11932_c0_g1	ZFIN|ZDB-GENE-030131-1565	86.1	1.3e-28	-	ddx3a	GO:0003676	nucleic acid binding	molecular_function	5
TRINITY_DN11932_c0_g1	ZFIN|ZDB-GENE-030131-1565	86.1	1.3e-28	-	ddx3a	GO:0004004	ATP-dependent RNA helicase activity	molecular_function	11
TRINITY_DN11932_c0_g1	ZFIN|ZDB-GENE-030131-1565	86.1	1.3e-28	-	ddx3a	GO:0004386	helicase activity	molecular_function	9
TRINITY_DN11932_c0_g1	ZFIN|ZDB-GENE-030131-1565	86.1	1.3e-28	-	ddx3a	GO:0005524	ATP binding	molecular_function	5
TRINITY_DN11932_c0_g1	ZFIN|ZDB-GENE-030131-1565	86.1	1.3e-28	-	ddx3a	GO:0005730	nucleolus	cellular_component	6
TRINITY_DN11932_c0_g1	ZFIN|ZDB-GENE-030131-1565	86.1	1.3e-28	-	ddx3a	GO:0006413	translational initiation	biological_process	5
TRINITY_DN11932_c0_g1	ZFIN|ZDB-GENE-030131-1565	86.1	1.3e-28	-	ddx3a	GO:0007059	chromosome segregation	biological_process	4
TRINITY_DN11932_c0_g1	ZFIN|ZDB-GENE-030131-1565	86.1	1.3e-28	-	ddx3a	GO:0010468	regulation of gene expression	biological_process	7
TRINITY_DN11932_c0_g1	ZFIN|ZDB-GENE-030131-1565	86.1	1.3e-28	-	ddx3a	GO:0010501	RNA secondary structure unwinding	biological_process	9
TRINITY_DN11932_c0_g1	ZFIN|ZDB-GENE-030131-1565	86.1	1.3e-28	-	ddx3a	GO:0016787	hydrolase activity	molecular_function	4
TRINITY_DN11932_c0_g1	ZFIN|ZDB-GENE-030131-1565	86.1	1.3e-28	-	ddx3a	GO:0036464	cytoplasmic ribonucleoprotein granule	cellular_component	7
TRINITY_DN11935_c0_g1	UNIPROTKB|I1NAD0	98.9	7.6e-44	-	GLYMA_19G186000	GO:0004807	triose-phosphate isomerase activity	molecular_function	7
TRINITY_DN11935_c0_g1	UNIPROTKB|I1NAD0	98.9	7.6e-44	-	GLYMA_19G186000	GO:0005829	cytosol	cellular_component	6
TRINITY_DN11935_c0_g1	UNIPROTKB|I1NAD0	98.9	7.6e-44	-	GLYMA_19G186000	GO:0006094	gluconeogenesis	biological_process	9
TRINITY_DN11935_c0_g1	UNIPROTKB|I1NAD0	98.9	7.6e-44	-	GLYMA_19G186000	GO:0006096	glycolytic process	biological_process	10
TRINITY_DN11935_c0_g1	UNIPROTKB|I1NAD0	98.9	7.6e-44	-	GLYMA_19G186000	GO:0019563	glycerol catabolic process	biological_process	9
TRINITY_DN11935_c0_g1	UNIPROTKB|I1NAD0	98.9	7.6e-44	-	GLYMA_19G186000	GO:0046166	glyceraldehyde-3-phosphate biosynthetic process	biological_process	7
TRINITY_DN11942_c0_g3	UNIPROTKB|I1K5B7	100	3.2e-38	100820554	GLYMA_05G246500	GO:0005737	cytoplasm	cellular_component	5
TRINITY_DN11942_c0_g3	UNIPROTKB|I1K5B7	100	3.2e-38	100820554	GLYMA_05G246500	GO:0008757	S-adenosylmethionine-dependent methyltransferase activity	molecular_function	7
TRINITY_DN11942_c0_g3	UNIPROTKB|I1K5B7	100	3.2e-38	100820554	GLYMA_05G246500	GO:0032259	methylation	biological_process	4
TRINITY_DN11953_c0_g1	UNIPROTKB|F6HIM6	78.8	1.4e-24	100248290	VIT_12s0059g02770	GO:0003700	DNA binding transcription factor activity	molecular_function	4
TRINITY_DN11953_c0_g1	UNIPROTKB|F6HIM6	78.8	1.4e-24	100248290	VIT_12s0059g02770	GO:0005634	nucleus	cellular_component	6
TRINITY_DN11953_c0_g1	UNIPROTKB|F6HIM6	78.8	1.4e-24	100248290	VIT_12s0059g02770	GO:0006355	regulation of transcription, DNA-templated	biological_process	8
TRINITY_DN11953_c0_g1	UNIPROTKB|F6HIM6	78.8	1.4e-24	100248290	VIT_12s0059g02770	GO:0043565	sequence-specific DNA binding	molecular_function	7
TRINITY_DN11954_c0_g1	ZFIN|ZDB-GENE-071116-5	71.4	7.6e-18	569226	irak1	GO:0002224	toll-like receptor signaling pathway	biological_process	8
TRINITY_DN11954_c0_g1	ZFIN|ZDB-GENE-071116-5	71.4	7.6e-18	569226	irak1	GO:0004672	protein kinase activity	molecular_function	7
TRINITY_DN11954_c0_g1	ZFIN|ZDB-GENE-071116-5	71.4	7.6e-18	569226	irak1	GO:0004674	protein serine/threonine kinase activity	molecular_function	8
TRINITY_DN11954_c0_g1	ZFIN|ZDB-GENE-071116-5	71.4	7.6e-18	569226	irak1	GO:0005524	ATP binding	molecular_function	5
TRINITY_DN11954_c0_g1	ZFIN|ZDB-GENE-071116-5	71.4	7.6e-18	569226	irak1	GO:0005634	nucleus	cellular_component	6
TRINITY_DN11954_c0_g1	ZFIN|ZDB-GENE-071116-5	71.4	7.6e-18	569226	irak1	GO:0005737	cytoplasm	cellular_component	5
TRINITY_DN11954_c0_g1	ZFIN|ZDB-GENE-071116-5	71.4	7.6e-18	569226	irak1	GO:0006468	protein phosphorylation	biological_process	9
TRINITY_DN11954_c0_g1	ZFIN|ZDB-GENE-071116-5	71.4	7.6e-18	569226	irak1	GO:0007165	signal transduction	biological_process	4
TRINITY_DN11954_c0_g1	ZFIN|ZDB-GENE-071116-5	71.4	7.6e-18	569226	irak1	GO:0035556	intracellular signal transduction	biological_process	5
TRINITY_DN11954_c0_g1	ZFIN|ZDB-GENE-071116-5	71.4	7.6e-18	569226	irak1	GO:0051092	positive regulation of NF-kappaB transcription factor activity	biological_process	7
TRINITY_DN11954_c0_g1	ZFIN|ZDB-GENE-071116-5	71.4	7.6e-18	569226	irak1	GO:0070498	interleukin-1-mediated signaling pathway	biological_process	7
TRINITY_DN11959_c0_g1	WB|WBGene00001244	48.1	5.4e-14	177321	elo-6	GO:0006629	lipid metabolic process	biological_process	5
TRINITY_DN11959_c0_g1	WB|WBGene00001244	48.1	5.4e-14	177321	elo-6	GO:0006631	fatty acid metabolic process	biological_process	9
TRINITY_DN11959_c0_g1	WB|WBGene00001244	48.1	5.4e-14	177321	elo-6	GO:0006633	fatty acid biosynthetic process	biological_process	10
TRINITY_DN11959_c0_g1	WB|WBGene00001244	48.1	5.4e-14	177321	elo-6	GO:0009922	fatty acid elongase activity	molecular_function	8
TRINITY_DN11959_c0_g1	WB|WBGene00001244	48.1	5.4e-14	177321	elo-6	GO:0016020	membrane	cellular_component	3
TRINITY_DN11959_c0_g1	WB|WBGene00001244	48.1	5.4e-14	177321	elo-6	GO:0016021	integral component of membrane	cellular_component	5
TRINITY_DN11959_c0_g1	WB|WBGene00001244	48.1	5.4e-14	177321	elo-6	GO:0016740	transferase activity	molecular_function	4
TRINITY_DN11959_c0_g1	WB|WBGene00001244	48.1	5.4e-14	177321	elo-6	GO:0019367	fatty acid elongation, saturated fatty acid	biological_process	12
TRINITY_DN11959_c0_g1	WB|WBGene00001244	48.1	5.4e-14	177321	elo-6	GO:0030148	sphingolipid biosynthetic process	biological_process	9
TRINITY_DN11959_c0_g1	WB|WBGene00001244	48.1	5.4e-14	177321	elo-6	GO:0030176	integral component of endoplasmic reticulum membrane	cellular_component	7
TRINITY_DN11959_c0_g1	WB|WBGene00001244	48.1	5.4e-14	177321	elo-6	GO:0034625	fatty acid elongation, monounsaturated fatty acid	biological_process	13
TRINITY_DN11959_c0_g1	WB|WBGene00001244	48.1	5.4e-14	177321	elo-6	GO:0034626	fatty acid elongation, polyunsaturated fatty acid	biological_process	13
TRINITY_DN11959_c0_g1	WB|WBGene00001244	48.1	5.4e-14	177321	elo-6	GO:0042761	very long-chain fatty acid biosynthetic process	biological_process	11
TRINITY_DN11959_c0_g1	WB|WBGene00001244	48.1	5.4e-14	177321	elo-6	GO:0102336	3-oxo-arachidoyl-CoA synthase activity	molecular_function	7
TRINITY_DN11959_c0_g1	WB|WBGene00001244	48.1	5.4e-14	177321	elo-6	GO:0102337	3-oxo-cerotoyl-CoA synthase activity	molecular_function	7
TRINITY_DN11959_c0_g1	WB|WBGene00001244	48.1	5.4e-14	177321	elo-6	GO:0102338	3-oxo-lignoceronyl-CoA synthase activity	molecular_function	7
TRINITY_DN11959_c0_g1	WB|WBGene00001244	48.1	5.4e-14	177321	elo-6	GO:0102756	very-long-chain 3-ketoacyl-CoA synthase activity	molecular_function	7
TRINITY_DN11992_c0_g1	TAIR|locus:2168367	58.5	1.7e-07	835386	RCF3	GO:0003676	nucleic acid binding	molecular_function	5
TRINITY_DN11992_c0_g1	TAIR|locus:2168367	58.5	1.7e-07	835386	RCF3	GO:0003723	RNA binding	molecular_function	6
TRINITY_DN11992_c0_g1	TAIR|locus:2168367	58.5	1.7e-07	835386	RCF3	GO:0005515	protein binding	molecular_function	4
TRINITY_DN11992_c0_g1	TAIR|locus:2168367	58.5	1.7e-07	835386	RCF3	GO:0005634	nucleus	cellular_component	6
TRINITY_DN11992_c0_g1	TAIR|locus:2168367	58.5	1.7e-07	835386	RCF3	GO:0006397	mRNA processing	biological_process	10
TRINITY_DN11992_c0_g1	TAIR|locus:2168367	58.5	1.7e-07	835386	RCF3	GO:0006970	response to osmotic stress	biological_process	5
TRINITY_DN11992_c0_g1	TAIR|locus:2168367	58.5	1.7e-07	835386	RCF3	GO:0008380	RNA splicing	biological_process	10
TRINITY_DN11992_c0_g1	TAIR|locus:2168367	58.5	1.7e-07	835386	RCF3	GO:0009867	jasmonic acid mediated signaling pathway	biological_process	6
TRINITY_DN11992_c0_g1	TAIR|locus:2168367	58.5	1.7e-07	835386	RCF3	GO:0010286	heat acclimation	biological_process	6
TRINITY_DN11992_c0_g1	TAIR|locus:2168367	58.5	1.7e-07	835386	RCF3	GO:0010445	nuclear dicing body	cellular_component	8
TRINITY_DN11992_c0_g1	TAIR|locus:2168367	58.5	1.7e-07	835386	RCF3	GO:0010468	regulation of gene expression	biological_process	7
TRINITY_DN11992_c0_g1	TAIR|locus:2168367	58.5	1.7e-07	835386	RCF3	GO:0016021	integral component of membrane	cellular_component	5
TRINITY_DN11992_c0_g1	TAIR|locus:2168367	58.5	1.7e-07	835386	RCF3	GO:0016607	nuclear speck	cellular_component	8
TRINITY_DN11992_c0_g1	TAIR|locus:2168367	58.5	1.7e-07	835386	RCF3	GO:0031053	primary miRNA processing	biological_process	11
TRINITY_DN11992_c0_g1	TAIR|locus:2168367	58.5	1.7e-07	835386	RCF3	GO:0070878	primary miRNA binding	molecular_function	7
TRINITY_DN11992_c0_g1	TAIR|locus:2168367	58.5	1.7e-07	835386	RCF3	GO:1900150	regulation of defense response to fungus	biological_process	7
TRINITY_DN12011_c0_g1	TAIR|locus:2063464	84.1	3e-27	818078	AT2G35120	GO:0004375	glycine dehydrogenase (decarboxylating) activity	molecular_function	7
TRINITY_DN12011_c0_g1	TAIR|locus:2063464	84.1	3e-27	818078	AT2G35120	GO:0005524	ATP binding	molecular_function	5
TRINITY_DN12011_c0_g1	TAIR|locus:2063464	84.1	3e-27	818078	AT2G35120	GO:0005739	mitochondrion	cellular_component	6
TRINITY_DN12011_c0_g1	TAIR|locus:2063464	84.1	3e-27	818078	AT2G35120	GO:0005960	glycine cleavage complex	cellular_component	6
TRINITY_DN12011_c0_g1	TAIR|locus:2063464	84.1	3e-27	818078	AT2G35120	GO:0006546	glycine catabolic process	biological_process	12
TRINITY_DN12011_c0_g1	TAIR|locus:2063464	84.1	3e-27	818078	AT2G35120	GO:0019464	glycine decarboxylation via glycine cleavage system	biological_process	13
TRINITY_DN12016_c0_g1	ZFIN|ZDB-GENE-990415-25	100	3.2e-22	30733	rrm2	GO:0004748	ribonucleoside-diphosphate reductase activity, thioredoxin disulfide as acceptor	molecular_function	8
TRINITY_DN12016_c0_g1	ZFIN|ZDB-GENE-990415-25	100	3.2e-22	30733	rrm2	GO:0005737	cytoplasm	cellular_component	5
TRINITY_DN12016_c0_g1	ZFIN|ZDB-GENE-990415-25	100	3.2e-22	30733	rrm2	GO:0005971	ribonucleoside-diphosphate reductase complex	cellular_component	7
TRINITY_DN12016_c0_g1	ZFIN|ZDB-GENE-990415-25	100	3.2e-22	30733	rrm2	GO:0006260	DNA replication	biological_process	8
TRINITY_DN12016_c0_g1	ZFIN|ZDB-GENE-990415-25	100	3.2e-22	30733	rrm2	GO:0009263	deoxyribonucleotide biosynthetic process	biological_process	10
TRINITY_DN12016_c0_g1	ZFIN|ZDB-GENE-990415-25	100	3.2e-22	30733	rrm2	GO:0016020	membrane	cellular_component	3
TRINITY_DN12016_c0_g1	ZFIN|ZDB-GENE-990415-25	100	3.2e-22	30733	rrm2	GO:0016021	integral component of membrane	cellular_component	5
TRINITY_DN12016_c0_g1	ZFIN|ZDB-GENE-990415-25	100	3.2e-22	30733	rrm2	GO:0016491	oxidoreductase activity	molecular_function	4
TRINITY_DN12016_c0_g1	ZFIN|ZDB-GENE-990415-25	100	3.2e-22	30733	rrm2	GO:0046872	metal ion binding	molecular_function	6
TRINITY_DN12016_c0_g1	ZFIN|ZDB-GENE-990415-25	100	3.2e-22	30733	rrm2	GO:0055114	oxidation-reduction process	biological_process	4
TRINITY_DN12016_c0_g2	UNIPROTKB|C7J3K0	100	2.1e-26	-	Os06g0257450	GO:0004748	ribonucleoside-diphosphate reductase activity, thioredoxin disulfide as acceptor	molecular_function	8
TRINITY_DN12016_c0_g2	UNIPROTKB|C7J3K0	100	2.1e-26	-	Os06g0257450	GO:0005971	ribonucleoside-diphosphate reductase complex	cellular_component	7
TRINITY_DN12016_c0_g2	UNIPROTKB|C7J3K0	100	2.1e-26	-	Os06g0257450	GO:0009263	deoxyribonucleotide biosynthetic process	biological_process	10
TRINITY_DN12016_c0_g3	ZFIN|ZDB-GENE-990415-25	100	1.1e-32	30733	rrm2	GO:0004748	ribonucleoside-diphosphate reductase activity, thioredoxin disulfide as acceptor	molecular_function	8
TRINITY_DN12016_c0_g3	ZFIN|ZDB-GENE-990415-25	100	1.1e-32	30733	rrm2	GO:0005737	cytoplasm	cellular_component	5
TRINITY_DN12016_c0_g3	ZFIN|ZDB-GENE-990415-25	100	1.1e-32	30733	rrm2	GO:0005971	ribonucleoside-diphosphate reductase complex	cellular_component	7
TRINITY_DN12016_c0_g3	ZFIN|ZDB-GENE-990415-25	100	1.1e-32	30733	rrm2	GO:0006260	DNA replication	biological_process	8
TRINITY_DN12016_c0_g3	ZFIN|ZDB-GENE-990415-25	100	1.1e-32	30733	rrm2	GO:0009263	deoxyribonucleotide biosynthetic process	biological_process	10
TRINITY_DN12016_c0_g3	ZFIN|ZDB-GENE-990415-25	100	1.1e-32	30733	rrm2	GO:0016020	membrane	cellular_component	3
TRINITY_DN12016_c0_g3	ZFIN|ZDB-GENE-990415-25	100	1.1e-32	30733	rrm2	GO:0016021	integral component of membrane	cellular_component	5
TRINITY_DN12016_c0_g3	ZFIN|ZDB-GENE-990415-25	100	1.1e-32	30733	rrm2	GO:0016491	oxidoreductase activity	molecular_function	4
TRINITY_DN12016_c0_g3	ZFIN|ZDB-GENE-990415-25	100	1.1e-32	30733	rrm2	GO:0046872	metal ion binding	molecular_function	6
TRINITY_DN12016_c0_g3	ZFIN|ZDB-GENE-990415-25	100	1.1e-32	30733	rrm2	GO:0055114	oxidation-reduction process	biological_process	4
TRINITY_DN12082_c0_g2	UNIPROTKB|I1KEY6	100	3.2e-35	100799779	GLYMA_06G289400	GO:0004175	endopeptidase activity	molecular_function	7
TRINITY_DN12082_c0_g2	UNIPROTKB|I1KEY6	100	3.2e-35	100799779	GLYMA_06G289400	GO:0005634	nucleus	cellular_component	6
TRINITY_DN12082_c0_g2	UNIPROTKB|I1KEY6	100	3.2e-35	100799779	GLYMA_06G289400	GO:0008540	proteasome regulatory particle, base subcomplex	cellular_component	4
TRINITY_DN12082_c0_g2	UNIPROTKB|I1KEY6	100	3.2e-35	100799779	GLYMA_06G289400	GO:0034515	proteasome storage granule	cellular_component	7
TRINITY_DN12082_c0_g2	UNIPROTKB|I1KEY6	100	3.2e-35	100799779	GLYMA_06G289400	GO:0043161	proteasome-mediated ubiquitin-dependent protein catabolic process	biological_process	11
TRINITY_DN1209_c0_g1	TAIR|locus:2160422	87.3	1.9e-33	834169	PGD3	GO:0004616	phosphogluconate dehydrogenase (decarboxylating) activity	molecular_function	7
TRINITY_DN1209_c0_g1	TAIR|locus:2160422	87.3	1.9e-33	834169	PGD3	GO:0005515	protein binding	molecular_function	4
TRINITY_DN1209_c0_g1	TAIR|locus:2160422	87.3	1.9e-33	834169	PGD3	GO:0005737	cytoplasm	cellular_component	5
TRINITY_DN1209_c0_g1	TAIR|locus:2160422	87.3	1.9e-33	834169	PGD3	GO:0005739	mitochondrion	cellular_component	6
TRINITY_DN1209_c0_g1	TAIR|locus:2160422	87.3	1.9e-33	834169	PGD3	GO:0005829	cytosol	cellular_component	6
TRINITY_DN1209_c0_g1	TAIR|locus:2160422	87.3	1.9e-33	834169	PGD3	GO:0008114	phosphogluconate 2-dehydrogenase activity	molecular_function	7
TRINITY_DN1209_c0_g1	TAIR|locus:2160422	87.3	1.9e-33	834169	PGD3	GO:0009051	pentose-phosphate shunt, oxidative branch	biological_process	7
TRINITY_DN1209_c0_g1	TAIR|locus:2160422	87.3	1.9e-33	834169	PGD3	GO:0009506	plasmodesma	cellular_component	5
TRINITY_DN1209_c0_g1	TAIR|locus:2160422	87.3	1.9e-33	834169	PGD3	GO:0009507	chloroplast	cellular_component	7
TRINITY_DN1209_c0_g1	TAIR|locus:2160422	87.3	1.9e-33	834169	PGD3	GO:0009536	plastid	cellular_component	6
TRINITY_DN1209_c0_g1	TAIR|locus:2160422	87.3	1.9e-33	834169	PGD3	GO:0009570	chloroplast stroma	cellular_component	8
TRINITY_DN1209_c0_g1	TAIR|locus:2160422	87.3	1.9e-33	834169	PGD3	GO:0009744	response to sucrose	biological_process	8
TRINITY_DN1209_c0_g1	TAIR|locus:2160422	87.3	1.9e-33	834169	PGD3	GO:0009749	response to glucose	biological_process	9
TRINITY_DN1209_c0_g1	TAIR|locus:2160422	87.3	1.9e-33	834169	PGD3	GO:0009750	response to fructose	biological_process	9
TRINITY_DN1209_c0_g1	TAIR|locus:2160422	87.3	1.9e-33	834169	PGD3	GO:0019521	D-gluconate metabolic process	biological_process	10
TRINITY_DN1209_c0_g1	TAIR|locus:2160422	87.3	1.9e-33	834169	PGD3	GO:0046686	response to cadmium ion	biological_process	7
TRINITY_DN1209_c0_g1	TAIR|locus:2160422	87.3	1.9e-33	834169	PGD3	GO:0055114	oxidation-reduction process	biological_process	4
TRINITY_DN12145_c0_g1	TAIR|locus:2117537	53.6	8.3e-60	828683	AtCAPE2	GO:0003674	molecular_function	molecular_function	2
TRINITY_DN12145_c0_g1	TAIR|locus:2117537	53.6	8.3e-60	828683	AtCAPE2	GO:0005576	extracellular region	cellular_component	3
TRINITY_DN12145_c0_g1	TAIR|locus:2117537	53.6	8.3e-60	828683	AtCAPE2	GO:0008150	biological_process	biological_process	2
TRINITY_DN12153_c0_g1	UNIPROTKB|I1JWZ3	100	3.6e-36	100818043	GLYMA_04G174800	GO:0005887	integral component of plasma membrane	cellular_component	6
TRINITY_DN12153_c0_g1	UNIPROTKB|I1JWZ3	100	3.6e-36	100818043	GLYMA_04G174800	GO:0008553	proton-exporting ATPase activity, phosphorylative mechanism	molecular_function	10
TRINITY_DN12153_c0_g1	UNIPROTKB|I1JWZ3	100	3.6e-36	100818043	GLYMA_04G174800	GO:0043231	intracellular membrane-bounded organelle	cellular_component	5
TRINITY_DN12153_c0_g1	UNIPROTKB|I1JWZ3	100	3.6e-36	100818043	GLYMA_04G174800	GO:0051453	regulation of intracellular pH	biological_process	12
TRINITY_DN12153_c0_g1	UNIPROTKB|I1JWZ3	100	3.6e-36	100818043	GLYMA_04G174800	GO:1902600	proton transmembrane transport	biological_process	9
TRINITY_DN12175_c0_g1	TAIR|locus:2034330	78.6	3.2e-29	840509	AT1G36050	GO:0003674	molecular_function	molecular_function	2
TRINITY_DN12175_c0_g1	TAIR|locus:2034330	78.6	3.2e-29	840509	AT1G36050	GO:0005774	vacuolar membrane	cellular_component	7
TRINITY_DN12175_c0_g1	TAIR|locus:2034330	78.6	3.2e-29	840509	AT1G36050	GO:0005783	endoplasmic reticulum	cellular_component	6
TRINITY_DN12175_c0_g1	TAIR|locus:2034330	78.6	3.2e-29	840509	AT1G36050	GO:0005794	Golgi apparatus	cellular_component	6
TRINITY_DN12176_c0_g1	TAIR|locus:2092565	50.6	6.3e-19	820799	AT3G15590	GO:0003677	DNA binding	molecular_function	6
TRINITY_DN12176_c0_g1	TAIR|locus:2092565	50.6	6.3e-19	820799	AT3G15590	GO:0005739	mitochondrion	cellular_component	6
TRINITY_DN12176_c0_g1	TAIR|locus:2092565	50.6	6.3e-19	820799	AT3G15590	GO:0009451	RNA modification	biological_process	9
TRINITY_DN12184_c0_g1	ZFIN|ZDB-GENE-030131-6459	64	2e-08	334527	cap1	GO:0000902	cell morphogenesis	biological_process	6
TRINITY_DN12184_c0_g1	ZFIN|ZDB-GENE-030131-6459	64	2e-08	334527	cap1	GO:0001756	somitogenesis	biological_process	7
TRINITY_DN12184_c0_g1	ZFIN|ZDB-GENE-030131-6459	64	2e-08	334527	cap1	GO:0003779	actin binding	molecular_function	6
TRINITY_DN12184_c0_g1	ZFIN|ZDB-GENE-030131-6459	64	2e-08	334527	cap1	GO:0003785	actin monomer binding	molecular_function	7
TRINITY_DN12184_c0_g1	ZFIN|ZDB-GENE-030131-6459	64	2e-08	334527	cap1	GO:0007010	cytoskeleton organization	biological_process	6
TRINITY_DN12184_c0_g1	ZFIN|ZDB-GENE-030131-6459	64	2e-08	334527	cap1	GO:0007163	establishment or maintenance of cell polarity	biological_process	4
TRINITY_DN12184_c0_g1	ZFIN|ZDB-GENE-030131-6459	64	2e-08	334527	cap1	GO:0007165	signal transduction	biological_process	4
TRINITY_DN12184_c0_g1	ZFIN|ZDB-GENE-030131-6459	64	2e-08	334527	cap1	GO:0007190	activation of adenylate cyclase activity	biological_process	6
TRINITY_DN12184_c0_g1	ZFIN|ZDB-GENE-030131-6459	64	2e-08	334527	cap1	GO:0008078	mesodermal cell migration	biological_process	8
TRINITY_DN12184_c0_g1	ZFIN|ZDB-GENE-030131-6459	64	2e-08	334527	cap1	GO:0008154	actin polymerization or depolymerization	biological_process	7
TRINITY_DN12184_c0_g1	ZFIN|ZDB-GENE-030131-6459	64	2e-08	334527	cap1	GO:0008179	adenylate cyclase binding	molecular_function	6
TRINITY_DN12184_c0_g1	ZFIN|ZDB-GENE-030131-6459	64	2e-08	334527	cap1	GO:0030036	actin cytoskeleton organization	biological_process	7
TRINITY_DN12184_c0_g1	ZFIN|ZDB-GENE-030131-6459	64	2e-08	334527	cap1	GO:0030864	cortical actin cytoskeleton	cellular_component	8
TRINITY_DN12184_c0_g1	ZFIN|ZDB-GENE-030131-6459	64	2e-08	334527	cap1	GO:0045761	regulation of adenylate cyclase activity	biological_process	7
TRINITY_DN12192_c0_g1	UNIPROTKB|A4II09	100	5.5e-35	100124719	eif3a	GO:0001732	formation of cytoplasmic translation initiation complex	biological_process	9
TRINITY_DN12192_c0_g1	UNIPROTKB|A4II09	100	5.5e-35	100124719	eif3a	GO:0003743	translation initiation factor activity	molecular_function	8
TRINITY_DN12192_c0_g1	UNIPROTKB|A4II09	100	5.5e-35	100124719	eif3a	GO:0005852	eukaryotic translation initiation factor 3 complex	cellular_component	4
TRINITY_DN12203_c0_g1	TAIR|locus:2121899	73.2	4.2e-21	828571	NBR1	GO:0005515	protein binding	molecular_function	4
TRINITY_DN12203_c0_g1	TAIR|locus:2121899	73.2	4.2e-21	828571	NBR1	GO:0005737	cytoplasm	cellular_component	5
TRINITY_DN12203_c0_g1	TAIR|locus:2121899	73.2	4.2e-21	828571	NBR1	GO:0005773	vacuole	cellular_component	6
TRINITY_DN12203_c0_g1	TAIR|locus:2121899	73.2	4.2e-21	828571	NBR1	GO:0008270	zinc ion binding	molecular_function	8
TRINITY_DN12203_c0_g1	TAIR|locus:2121899	73.2	4.2e-21	828571	NBR1	GO:0015031	protein transport	biological_process	9
TRINITY_DN12203_c0_g1	TAIR|locus:2121899	73.2	4.2e-21	828571	NBR1	GO:0016236	macroautophagy	biological_process	7
TRINITY_DN12203_c0_g1	TAIR|locus:2121899	73.2	4.2e-21	828571	NBR1	GO:0043130	ubiquitin binding	molecular_function	6
TRINITY_DN12203_c0_g1	TAIR|locus:2121899	73.2	4.2e-21	828571	NBR1	GO:0051258	protein polymerization	biological_process	8
TRINITY_DN12246_c0_g1	ZFIN|ZDB-GENE-040718-460	65.5	1e-10	-	tmc6b	GO:0003674	molecular_function	molecular_function	2
TRINITY_DN12246_c0_g1	ZFIN|ZDB-GENE-040718-460	65.5	1e-10	-	tmc6b	GO:0008150	biological_process	biological_process	2
TRINITY_DN12246_c0_g1	ZFIN|ZDB-GENE-040718-460	65.5	1e-10	-	tmc6b	GO:0016020	membrane	cellular_component	3
TRINITY_DN12246_c0_g1	ZFIN|ZDB-GENE-040718-460	65.5	1e-10	-	tmc6b	GO:0016021	integral component of membrane	cellular_component	5
TRINITY_DN12247_c0_g1	TAIR|locus:2029974	79.3	9.1e-35	839797	CIPK18	GO:0004674	protein serine/threonine kinase activity	molecular_function	8
TRINITY_DN12247_c0_g1	TAIR|locus:2029974	79.3	9.1e-35	839797	CIPK18	GO:0005524	ATP binding	molecular_function	5
TRINITY_DN12247_c0_g1	TAIR|locus:2029974	79.3	9.1e-35	839797	CIPK18	GO:0005622	intracellular	cellular_component	4
TRINITY_DN12247_c0_g1	TAIR|locus:2029974	79.3	9.1e-35	839797	CIPK18	GO:0005886	plasma membrane	cellular_component	4
TRINITY_DN12247_c0_g1	TAIR|locus:2029974	79.3	9.1e-35	839797	CIPK18	GO:0016301	kinase activity	molecular_function	6
TRINITY_DN12247_c0_g1	TAIR|locus:2029974	79.3	9.1e-35	839797	CIPK18	GO:0018105	peptidyl-serine phosphorylation	biological_process	10
TRINITY_DN12247_c0_g1	TAIR|locus:2029974	79.3	9.1e-35	839797	CIPK18	GO:0018107	peptidyl-threonine phosphorylation	biological_process	10
TRINITY_DN12247_c0_g1	TAIR|locus:2029974	79.3	9.1e-35	839797	CIPK18	GO:0035556	intracellular signal transduction	biological_process	5
TRINITY_DN1224_c0_g2	UNIPROTKB|C6T3N6	100	8.4e-63	100527221	GSTU43	GO:0004364	glutathione transferase activity	molecular_function	6
TRINITY_DN1224_c0_g2	UNIPROTKB|C6T3N6	100	8.4e-63	100527221	GSTU43	GO:0005737	cytoplasm	cellular_component	5
TRINITY_DN1224_c0_g2	UNIPROTKB|C6T3N6	100	8.4e-63	100527221	GSTU43	GO:0006749	glutathione metabolic process	biological_process	8
TRINITY_DN1224_c0_g2	UNIPROTKB|C6T3N6	100	8.4e-63	100527221	GSTU43	GO:0009407	toxin catabolic process	biological_process	6
TRINITY_DN1228_c0_g1	UNIPROTKB|Q8SAY0	100	1.9e-15	4334651	RPL18	GO:0008097	5S rRNA binding	molecular_function	8
TRINITY_DN12309_c0_g2	UNIPROTKB|I1GN40	91.4	7.6e-34	100828538	BRADI1G08070	GO:0005737	cytoplasm	cellular_component	5
TRINITY_DN12309_c0_g2	UNIPROTKB|I1GN40	91.4	7.6e-34	100828538	BRADI1G08070	GO:0005980	glycogen catabolic process	biological_process	10
TRINITY_DN12309_c0_g2	UNIPROTKB|I1GN40	91.4	7.6e-34	100828538	BRADI1G08070	GO:0008184	glycogen phosphorylase activity	molecular_function	8
TRINITY_DN12309_c0_g2	UNIPROTKB|I1GN40	91.4	7.6e-34	100828538	BRADI1G08070	GO:0030170	pyridoxal phosphate binding	molecular_function	6
TRINITY_DN12309_c0_g3	UNIPROTKB|Q0DNE4	100	5.5e-25	-	Os03g0758100	GO:0005737	cytoplasm	cellular_component	5
TRINITY_DN12309_c0_g3	UNIPROTKB|Q0DNE4	100	5.5e-25	-	Os03g0758100	GO:0005980	glycogen catabolic process	biological_process	10
TRINITY_DN12309_c0_g3	UNIPROTKB|Q0DNE4	100	5.5e-25	-	Os03g0758100	GO:0008184	glycogen phosphorylase activity	molecular_function	8
TRINITY_DN12309_c0_g3	UNIPROTKB|Q0DNE4	100	5.5e-25	-	Os03g0758100	GO:0030170	pyridoxal phosphate binding	molecular_function	6
TRINITY_DN12327_c0_g1	UNIPROTKB|Q99497	100	3e-30	11315	PARK7	GO:0000785	chromatin	cellular_component	6
TRINITY_DN12327_c0_g1	UNIPROTKB|Q99497	100	3e-30	11315	PARK7	GO:0001047	core promoter binding	molecular_function	8
TRINITY_DN12327_c0_g1	UNIPROTKB|Q99497	100	3e-30	11315	PARK7	GO:0001933	negative regulation of protein phosphorylation	biological_process	10
TRINITY_DN12327_c0_g1	UNIPROTKB|Q99497	100	3e-30	11315	PARK7	GO:0003690	double-stranded DNA binding	molecular_function	7
TRINITY_DN12327_c0_g1	UNIPROTKB|Q99497	100	3e-30	11315	PARK7	GO:0003697	single-stranded DNA binding	molecular_function	7
TRINITY_DN12327_c0_g1	UNIPROTKB|Q99497	100	3e-30	11315	PARK7	GO:0003713	transcription coactivator activity	molecular_function	5
TRINITY_DN12327_c0_g1	UNIPROTKB|Q99497	100	3e-30	11315	PARK7	GO:0003729	mRNA binding	molecular_function	7
TRINITY_DN12327_c0_g1	UNIPROTKB|Q99497	100	3e-30	11315	PARK7	GO:0005102	receptor binding	molecular_function	5
TRINITY_DN12327_c0_g1	UNIPROTKB|Q99497	100	3e-30	11315	PARK7	GO:0005507	copper ion binding	molecular_function	8
TRINITY_DN12327_c0_g1	UNIPROTKB|Q99497	100	3e-30	11315	PARK7	GO:0005515	protein binding	molecular_function	4
TRINITY_DN12327_c0_g1	UNIPROTKB|Q99497	100	3e-30	11315	PARK7	GO:0005634	nucleus	cellular_component	6
TRINITY_DN12327_c0_g1	UNIPROTKB|Q99497	100	3e-30	11315	PARK7	GO:0005737	cytoplasm	cellular_component	5
TRINITY_DN12327_c0_g1	UNIPROTKB|Q99497	100	3e-30	11315	PARK7	GO:0005739	mitochondrion	cellular_component	6
TRINITY_DN12327_c0_g1	UNIPROTKB|Q99497	100	3e-30	11315	PARK7	GO:0005747	mitochondrial respiratory chain complex I	cellular_component	7
TRINITY_DN12327_c0_g1	UNIPROTKB|Q99497	100	3e-30	11315	PARK7	GO:0005758	mitochondrial intermembrane space	cellular_component	6
TRINITY_DN12327_c0_g1	UNIPROTKB|Q99497	100	3e-30	11315	PARK7	GO:0005759	mitochondrial matrix	cellular_component	7
TRINITY_DN12327_c0_g1	UNIPROTKB|Q99497	100	3e-30	11315	PARK7	GO:0005783	endoplasmic reticulum	cellular_component	6
TRINITY_DN12327_c0_g1	UNIPROTKB|Q99497	100	3e-30	11315	PARK7	GO:0005829	cytosol	cellular_component	6
TRINITY_DN12327_c0_g1	UNIPROTKB|Q99497	100	3e-30	11315	PARK7	GO:0005886	plasma membrane	cellular_component	4
TRINITY_DN12327_c0_g1	UNIPROTKB|Q99497	100	3e-30	11315	PARK7	GO:0006469	negative regulation of protein kinase activity	biological_process	11
TRINITY_DN12327_c0_g1	UNIPROTKB|Q99497	100	3e-30	11315	PARK7	GO:0006508	proteolysis	biological_process	7
TRINITY_DN12327_c0_g1	UNIPROTKB|Q99497	100	3e-30	11315	PARK7	GO:0006517	protein deglycosylation	biological_process	9
TRINITY_DN12327_c0_g1	UNIPROTKB|Q99497	100	3e-30	11315	PARK7	GO:0006914	autophagy	biological_process	6
TRINITY_DN12327_c0_g1	UNIPROTKB|Q99497	100	3e-30	11315	PARK7	GO:0006954	inflammatory response	biological_process	6
TRINITY_DN12327_c0_g1	UNIPROTKB|Q99497	100	3e-30	11315	PARK7	GO:0007005	mitochondrion organization	biological_process	6
TRINITY_DN12327_c0_g1	UNIPROTKB|Q99497	100	3e-30	11315	PARK7	GO:0007265	Ras protein signal transduction	biological_process	7
TRINITY_DN12327_c0_g1	UNIPROTKB|Q99497	100	3e-30	11315	PARK7	GO:0007338	single fertilization	biological_process	5
TRINITY_DN12327_c0_g1	UNIPROTKB|Q99497	100	3e-30	11315	PARK7	GO:0008134	transcription factor binding	molecular_function	5
TRINITY_DN12327_c0_g1	UNIPROTKB|Q99497	100	3e-30	11315	PARK7	GO:0008233	peptidase activity	molecular_function	5
TRINITY_DN12327_c0_g1	UNIPROTKB|Q99497	100	3e-30	11315	PARK7	GO:0008344	adult locomotory behavior	biological_process	5
TRINITY_DN12327_c0_g1	UNIPROTKB|Q99497	100	3e-30	11315	PARK7	GO:0010273	detoxification of copper ion	biological_process	5
TRINITY_DN12327_c0_g1	UNIPROTKB|Q99497	100	3e-30	11315	PARK7	GO:0010628	positive regulation of gene expression	biological_process	8
TRINITY_DN12327_c0_g1	UNIPROTKB|Q99497	100	3e-30	11315	PARK7	GO:0010629	negative regulation of gene expression	biological_process	8
TRINITY_DN12327_c0_g1	UNIPROTKB|Q99497	100	3e-30	11315	PARK7	GO:0016532	superoxide dismutase copper chaperone activity	molecular_function	6
TRINITY_DN12327_c0_g1	UNIPROTKB|Q99497	100	3e-30	11315	PARK7	GO:0016605	PML body	cellular_component	8
TRINITY_DN12327_c0_g1	UNIPROTKB|Q99497	100	3e-30	11315	PARK7	GO:0016684	oxidoreductase activity, acting on peroxide as acceptor	molecular_function	5
TRINITY_DN12327_c0_g1	UNIPROTKB|Q99497	100	3e-30	11315	PARK7	GO:0018323	enzyme active site formation via L-cysteine sulfinic acid	biological_process	11
TRINITY_DN12327_c0_g1	UNIPROTKB|Q99497	100	3e-30	11315	PARK7	GO:0019172	glyoxalase III activity	molecular_function	7
TRINITY_DN12327_c0_g1	UNIPROTKB|Q99497	100	3e-30	11315	PARK7	GO:0019243	methylglyoxal catabolic process to D-lactate via S-lactoyl-glutathione	biological_process	11
TRINITY_DN12327_c0_g1	UNIPROTKB|Q99497	100	3e-30	11315	PARK7	GO:0019249	lactate biosynthetic process	biological_process	10
TRINITY_DN12327_c0_g1	UNIPROTKB|Q99497	100	3e-30	11315	PARK7	GO:0019899	enzyme binding	molecular_function	5
TRINITY_DN12327_c0_g1	UNIPROTKB|Q99497	100	3e-30	11315	PARK7	GO:0019900	kinase binding	molecular_function	6
TRINITY_DN12327_c0_g1	UNIPROTKB|Q99497	100	3e-30	11315	PARK7	GO:0019955	cytokine binding	molecular_function	5
TRINITY_DN12327_c0_g1	UNIPROTKB|Q99497	100	3e-30	11315	PARK7	GO:0030424	axon	cellular_component	6
TRINITY_DN12327_c0_g1	UNIPROTKB|Q99497	100	3e-30	11315	PARK7	GO:0031397	negative regulation of protein ubiquitination	biological_process	11
TRINITY_DN12327_c0_g1	UNIPROTKB|Q99497	100	3e-30	11315	PARK7	GO:0032091	negative regulation of protein binding	biological_process	7
TRINITY_DN12327_c0_g1	UNIPROTKB|Q99497	100	3e-30	11315	PARK7	GO:0032148	activation of protein kinase B activity	biological_process	13
TRINITY_DN12327_c0_g1	UNIPROTKB|Q99497	100	3e-30	11315	PARK7	GO:0032435	negative regulation of proteasomal ubiquitin-dependent protein catabolic process	biological_process	12
TRINITY_DN12327_c0_g1	UNIPROTKB|Q99497	100	3e-30	11315	PARK7	GO:0032757	positive regulation of interleukin-8 production	biological_process	8
TRINITY_DN12327_c0_g1	UNIPROTKB|Q99497	100	3e-30	11315	PARK7	GO:0033138	positive regulation of peptidyl-serine phosphorylation	biological_process	11
TRINITY_DN12327_c0_g1	UNIPROTKB|Q99497	100	3e-30	11315	PARK7	GO:0033234	negative regulation of protein sumoylation	biological_process	11
TRINITY_DN12327_c0_g1	UNIPROTKB|Q99497	100	3e-30	11315	PARK7	GO:0034599	cellular response to oxidative stress	biological_process	6
TRINITY_DN12327_c0_g1	UNIPROTKB|Q99497	100	3e-30	11315	PARK7	GO:0036470	tyrosine 3-monooxygenase activator activity	molecular_function	6
TRINITY_DN12327_c0_g1	UNIPROTKB|Q99497	100	3e-30	11315	PARK7	GO:0036471	cellular response to glyoxal	biological_process	7
TRINITY_DN12327_c0_g1	UNIPROTKB|Q99497	100	3e-30	11315	PARK7	GO:0036478	L-dopa decarboxylase activator activity	molecular_function	6
TRINITY_DN12327_c0_g1	UNIPROTKB|Q99497	100	3e-30	11315	PARK7	GO:0042493	response to drug	biological_process	5
TRINITY_DN12327_c0_g1	UNIPROTKB|Q99497	100	3e-30	11315	PARK7	GO:0042743	hydrogen peroxide metabolic process	biological_process	7
TRINITY_DN12327_c0_g1	UNIPROTKB|Q99497	100	3e-30	11315	PARK7	GO:0042802	identical protein binding	molecular_function	5
TRINITY_DN12327_c0_g1	UNIPROTKB|Q99497	100	3e-30	11315	PARK7	GO:0042803	protein homodimerization activity	molecular_function	6
TRINITY_DN12327_c0_g1	UNIPROTKB|Q99497	100	3e-30	11315	PARK7	GO:0043066	negative regulation of apoptotic process	biological_process	9
TRINITY_DN12327_c0_g1	UNIPROTKB|Q99497	100	3e-30	11315	PARK7	GO:0043523	regulation of neuron apoptotic process	biological_process	9
TRINITY_DN12327_c0_g1	UNIPROTKB|Q99497	100	3e-30	11315	PARK7	GO:0043524	negative regulation of neuron apoptotic process	biological_process	10
TRINITY_DN12327_c0_g1	UNIPROTKB|Q99497	100	3e-30	11315	PARK7	GO:0044297	cell body	cellular_component	4
TRINITY_DN12327_c0_g1	UNIPROTKB|Q99497	100	3e-30	11315	PARK7	GO:0044388	small protein activating enzyme binding	molecular_function	6
TRINITY_DN12327_c0_g1	UNIPROTKB|Q99497	100	3e-30	11315	PARK7	GO:0044390	ubiquitin-like protein conjugating enzyme binding	molecular_function	6
TRINITY_DN12327_c0_g1	UNIPROTKB|Q99497	100	3e-30	11315	PARK7	GO:0045121	membrane raft	cellular_component	6
TRINITY_DN12327_c0_g1	UNIPROTKB|Q99497	100	3e-30	11315	PARK7	GO:0045340	mercury ion binding	molecular_function	8
TRINITY_DN12327_c0_g1	UNIPROTKB|Q99497	100	3e-30	11315	PARK7	GO:0045560	regulation of TRAIL receptor biosynthetic process	biological_process	9
TRINITY_DN12327_c0_g1	UNIPROTKB|Q99497	100	3e-30	11315	PARK7	GO:0045944	positive regulation of transcription by RNA polymerase II	biological_process	10
TRINITY_DN12327_c0_g1	UNIPROTKB|Q99497	100	3e-30	11315	PARK7	GO:0046295	glycolate biosynthetic process	biological_process	7
TRINITY_DN12327_c0_g1	UNIPROTKB|Q99497	100	3e-30	11315	PARK7	GO:0046826	negative regulation of protein export from nucleus	biological_process	10
TRINITY_DN12327_c0_g1	UNIPROTKB|Q99497	100	3e-30	11315	PARK7	GO:0050681	androgen receptor binding	molecular_function	9
TRINITY_DN12327_c0_g1	UNIPROTKB|Q99497	100	3e-30	11315	PARK7	GO:0050727	regulation of inflammatory response	biological_process	8
TRINITY_DN12327_c0_g1	UNIPROTKB|Q99497	100	3e-30	11315	PARK7	GO:0050787	detoxification of mercury ion	biological_process	5
TRINITY_DN12327_c0_g1	UNIPROTKB|Q99497	100	3e-30	11315	PARK7	GO:0050821	protein stabilization	biological_process	6
TRINITY_DN12327_c0_g1	UNIPROTKB|Q99497	100	3e-30	11315	PARK7	GO:0051091	positive regulation of DNA binding transcription factor activity	biological_process	6
TRINITY_DN12327_c0_g1	UNIPROTKB|Q99497	100	3e-30	11315	PARK7	GO:0051444	negative regulation of ubiquitin-protein transferase activity	biological_process	12
TRINITY_DN12327_c0_g1	UNIPROTKB|Q99497	100	3e-30	11315	PARK7	GO:0051583	dopamine uptake involved in synaptic transmission	biological_process	11
TRINITY_DN12327_c0_g1	UNIPROTKB|Q99497	100	3e-30	11315	PARK7	GO:0051881	regulation of mitochondrial membrane potential	biological_process	6
TRINITY_DN12327_c0_g1	UNIPROTKB|Q99497	100	3e-30	11315	PARK7	GO:0051897	positive regulation of protein kinase B signaling	biological_process	10
TRINITY_DN12327_c0_g1	UNIPROTKB|Q99497	100	3e-30	11315	PARK7	GO:0051899	membrane depolarization	biological_process	6
TRINITY_DN12327_c0_g1	UNIPROTKB|Q99497	100	3e-30	11315	PARK7	GO:0051920	peroxiredoxin activity	molecular_function	4
TRINITY_DN12327_c0_g1	UNIPROTKB|Q99497	100	3e-30	11315	PARK7	GO:0060081	membrane hyperpolarization	biological_process	6
TRINITY_DN12327_c0_g1	UNIPROTKB|Q99497	100	3e-30	11315	PARK7	GO:0060548	negative regulation of cell death	biological_process	7
TRINITY_DN12327_c0_g1	UNIPROTKB|Q99497	100	3e-30	11315	PARK7	GO:0060765	regulation of androgen receptor signaling pathway	biological_process	9
TRINITY_DN12327_c0_g1	UNIPROTKB|Q99497	100	3e-30	11315	PARK7	GO:0070062	extracellular exosome	cellular_component	7
TRINITY_DN12327_c0_g1	UNIPROTKB|Q99497	100	3e-30	11315	PARK7	GO:0070301	cellular response to hydrogen peroxide	biological_process	8
TRINITY_DN12327_c0_g1	UNIPROTKB|Q99497	100	3e-30	11315	PARK7	GO:0070491	repressing transcription factor binding	molecular_function	7
TRINITY_DN12327_c0_g1	UNIPROTKB|Q99497	100	3e-30	11315	PARK7	GO:0090073	positive regulation of protein homodimerization activity	biological_process	8
TRINITY_DN12327_c0_g1	UNIPROTKB|Q99497	100	3e-30	11315	PARK7	GO:0097110	scaffold protein binding	molecular_function	5
TRINITY_DN12327_c0_g1	UNIPROTKB|Q99497	100	3e-30	11315	PARK7	GO:0098793	presynapse	cellular_component	4
TRINITY_DN12327_c0_g1	UNIPROTKB|Q99497	100	3e-30	11315	PARK7	GO:0098869	cellular oxidant detoxification	biological_process	5
TRINITY_DN12327_c0_g1	UNIPROTKB|Q99497	100	3e-30	11315	PARK7	GO:1900182	positive regulation of protein localization to nucleus	biological_process	9
TRINITY_DN12327_c0_g1	UNIPROTKB|Q99497	100	3e-30	11315	PARK7	GO:1901215	negative regulation of neuron death	biological_process	8
TRINITY_DN12327_c0_g1	UNIPROTKB|Q99497	100	3e-30	11315	PARK7	GO:1901671	positive regulation of superoxide dismutase activity	biological_process	8
TRINITY_DN12327_c0_g1	UNIPROTKB|Q99497	100	3e-30	11315	PARK7	GO:1901984	negative regulation of protein acetylation	biological_process	10
TRINITY_DN12327_c0_g1	UNIPROTKB|Q99497	100	3e-30	11315	PARK7	GO:1902177	positive regulation of oxidative stress-induced intrinsic apoptotic signaling pathway	biological_process	9
TRINITY_DN12327_c0_g1	UNIPROTKB|Q99497	100	3e-30	11315	PARK7	GO:1902236	negative regulation of endoplasmic reticulum stress-induced intrinsic apoptotic signaling pathway	biological_process	9
TRINITY_DN12327_c0_g1	UNIPROTKB|Q99497	100	3e-30	11315	PARK7	GO:1902903	regulation of supramolecular fiber organization	biological_process	7
TRINITY_DN12327_c0_g1	UNIPROTKB|Q99497	100	3e-30	11315	PARK7	GO:1902958	positive regulation of mitochondrial electron transport, NADH to ubiquinone	biological_process	13
TRINITY_DN12327_c0_g1	UNIPROTKB|Q99497	100	3e-30	11315	PARK7	GO:1903073	negative regulation of death-inducing signaling complex assembly	biological_process	8
TRINITY_DN12327_c0_g1	UNIPROTKB|Q99497	100	3e-30	11315	PARK7	GO:1903094	negative regulation of protein K48-linked deubiquitination	biological_process	11
TRINITY_DN12327_c0_g1	UNIPROTKB|Q99497	100	3e-30	11315	PARK7	GO:1903122	negative regulation of TRAIL-activated apoptotic signaling pathway	biological_process	12
TRINITY_DN12327_c0_g1	UNIPROTKB|Q99497	100	3e-30	11315	PARK7	GO:1903135	cupric ion binding	molecular_function	9
TRINITY_DN12327_c0_g1	UNIPROTKB|Q99497	100	3e-30	11315	PARK7	GO:1903136	cuprous ion binding	molecular_function	9
TRINITY_DN12327_c0_g1	UNIPROTKB|Q99497	100	3e-30	11315	PARK7	GO:1903168	positive regulation of pyrroline-5-carboxylate reductase activity	biological_process	8
TRINITY_DN12327_c0_g1	UNIPROTKB|Q99497	100	3e-30	11315	PARK7	GO:1903178	positive regulation of tyrosine 3-monooxygenase activity	biological_process	9
TRINITY_DN12327_c0_g1	UNIPROTKB|Q99497	100	3e-30	11315	PARK7	GO:1903181	positive regulation of dopamine biosynthetic process	biological_process	9
TRINITY_DN12327_c0_g1	UNIPROTKB|Q99497	100	3e-30	11315	PARK7	GO:1903190	glyoxal catabolic process	biological_process	7
TRINITY_DN12327_c0_g1	UNIPROTKB|Q99497	100	3e-30	11315	PARK7	GO:1903197	positive regulation of L-dopa biosynthetic process	biological_process	11
TRINITY_DN12327_c0_g1	UNIPROTKB|Q99497	100	3e-30	11315	PARK7	GO:1903200	positive regulation of L-dopa decarboxylase activity	biological_process	8
TRINITY_DN12327_c0_g1	UNIPROTKB|Q99497	100	3e-30	11315	PARK7	GO:1903202	negative regulation of oxidative stress-induced cell death	biological_process	8
TRINITY_DN12327_c0_g1	UNIPROTKB|Q99497	100	3e-30	11315	PARK7	GO:1903206	negative regulation of hydrogen peroxide-induced cell death	biological_process	10
TRINITY_DN12327_c0_g1	UNIPROTKB|Q99497	100	3e-30	11315	PARK7	GO:1903208	negative regulation of hydrogen peroxide-induced neuron death	biological_process	10
TRINITY_DN12327_c0_g1	UNIPROTKB|Q99497	100	3e-30	11315	PARK7	GO:1903377	negative regulation of oxidative stress-induced neuron intrinsic apoptotic signaling pathway	biological_process	11
TRINITY_DN12327_c0_g1	UNIPROTKB|Q99497	100	3e-30	11315	PARK7	GO:1903384	negative regulation of hydrogen peroxide-induced neuron intrinsic apoptotic signaling pathway	biological_process	11
TRINITY_DN12327_c0_g1	UNIPROTKB|Q99497	100	3e-30	11315	PARK7	GO:1903428	positive regulation of reactive oxygen species biosynthetic process	biological_process	8
TRINITY_DN12327_c0_g1	UNIPROTKB|Q99497	100	3e-30	11315	PARK7	GO:1903599	positive regulation of autophagy of mitochondrion	biological_process	10
TRINITY_DN12327_c0_g1	UNIPROTKB|Q99497	100	3e-30	11315	PARK7	GO:1990381	ubiquitin-specific protease binding	molecular_function	7
TRINITY_DN12327_c0_g1	UNIPROTKB|Q99497	100	3e-30	11315	PARK7	GO:1990422	glyoxalase (glycolic acid-forming) activity	molecular_function	7
TRINITY_DN12327_c0_g1	UNIPROTKB|Q99497	100	3e-30	11315	PARK7	GO:2000157	negative regulation of ubiquitin-specific protease activity	biological_process	11
TRINITY_DN12327_c0_g1	UNIPROTKB|Q99497	100	3e-30	11315	PARK7	GO:2000277	positive regulation of oxidative phosphorylation uncoupler activity	biological_process	7
TRINITY_DN12327_c0_g1	UNIPROTKB|Q99497	100	3e-30	11315	PARK7	GO:2000679	positive regulation of transcription regulatory region DNA binding	biological_process	8
TRINITY_DN12327_c0_g1	UNIPROTKB|Q99497	100	3e-30	11315	PARK7	GO:2000825	positive regulation of androgen receptor activity	biological_process	10
TRINITY_DN12327_c0_g1	UNIPROTKB|Q99497	100	3e-30	11315	PARK7	GO:2001237	negative regulation of extrinsic apoptotic signaling pathway	biological_process	10
TRINITY_DN12327_c0_g1	UNIPROTKB|Q99497	100	3e-30	11315	PARK7	GO:2001268	negative regulation of cysteine-type endopeptidase activity involved in apoptotic signaling pathway	biological_process	11
TRINITY_DN12337_c0_g1	TAIR|locus:2121154	75	3.3e-26	830003	STY46	GO:0004672	protein kinase activity	molecular_function	7
TRINITY_DN12337_c0_g1	TAIR|locus:2121154	75	3.3e-26	830003	STY46	GO:0004674	protein serine/threonine kinase activity	molecular_function	8
TRINITY_DN12337_c0_g1	TAIR|locus:2121154	75	3.3e-26	830003	STY46	GO:0004712	protein serine/threonine/tyrosine kinase activity	molecular_function	8
TRINITY_DN12337_c0_g1	TAIR|locus:2121154	75	3.3e-26	830003	STY46	GO:0005829	cytosol	cellular_component	6
TRINITY_DN12337_c0_g1	TAIR|locus:2121154	75	3.3e-26	830003	STY46	GO:0005886	plasma membrane	cellular_component	4
TRINITY_DN12337_c0_g1	TAIR|locus:2121154	75	3.3e-26	830003	STY46	GO:0009658	chloroplast organization	biological_process	7
TRINITY_DN12337_c0_g1	TAIR|locus:2121154	75	3.3e-26	830003	STY46	GO:0035556	intracellular signal transduction	biological_process	5
TRINITY_DN12337_c0_g3	UNIPROTKB|C5YS95	91.3	9.7e-34	-	Sb08g003920	GO:0004674	protein serine/threonine kinase activity	molecular_function	8
TRINITY_DN12337_c0_g3	UNIPROTKB|C5YS95	91.3	9.7e-34	-	Sb08g003920	GO:0005829	cytosol	cellular_component	6
TRINITY_DN12337_c0_g3	UNIPROTKB|C5YS95	91.3	9.7e-34	-	Sb08g003920	GO:0006468	protein phosphorylation	biological_process	9
TRINITY_DN12337_c0_g3	UNIPROTKB|C5YS95	91.3	9.7e-34	-	Sb08g003920	GO:0035556	intracellular signal transduction	biological_process	5
TRINITY_DN1234_c0_g1	MGI|MGI:1298389	100	1.2e-36	17474	Clec4d	GO:0002250	adaptive immune response	biological_process	5
TRINITY_DN1234_c0_g1	MGI|MGI:1298389	100	1.2e-36	17474	Clec4d	GO:0002292	T cell differentiation involved in immune response	biological_process	9
TRINITY_DN1234_c0_g1	MGI|MGI:1298389	100	1.2e-36	17474	Clec4d	GO:0002376	immune system process	biological_process	3
TRINITY_DN1234_c0_g1	MGI|MGI:1298389	100	1.2e-36	17474	Clec4d	GO:0005886	plasma membrane	cellular_component	4
TRINITY_DN1234_c0_g1	MGI|MGI:1298389	100	1.2e-36	17474	Clec4d	GO:0016020	membrane	cellular_component	3
TRINITY_DN1234_c0_g1	MGI|MGI:1298389	100	1.2e-36	17474	Clec4d	GO:0016021	integral component of membrane	cellular_component	5
TRINITY_DN1234_c0_g1	MGI|MGI:1298389	100	1.2e-36	17474	Clec4d	GO:0030246	carbohydrate binding	molecular_function	4
TRINITY_DN1234_c0_g1	MGI|MGI:1298389	100	1.2e-36	17474	Clec4d	GO:0034987	immunoglobulin receptor binding	molecular_function	6
TRINITY_DN1234_c0_g1	MGI|MGI:1298389	100	1.2e-36	17474	Clec4d	GO:0038094	Fc-gamma receptor signaling pathway	biological_process	8
TRINITY_DN1234_c0_g1	MGI|MGI:1298389	100	1.2e-36	17474	Clec4d	GO:0042742	defense response to bacterium	biological_process	8
TRINITY_DN1234_c0_g1	MGI|MGI:1298389	100	1.2e-36	17474	Clec4d	GO:0045087	innate immune response	biological_process	5
TRINITY_DN12350_c0_g2	TAIR|locus:4010713895	48.7	1.3e-15	5008150	AT4G21065	GO:0005739	mitochondrion	cellular_component	6
TRINITY_DN12350_c0_g2	TAIR|locus:4010713895	48.7	1.3e-15	5008150	AT4G21065	GO:0008150	biological_process	biological_process	2
TRINITY_DN12350_c0_g2	TAIR|locus:4010713895	48.7	1.3e-15	5008150	AT4G21065	GO:0008270	zinc ion binding	molecular_function	8
TRINITY_DN12353_c0_g1	ZFIN|ZDB-GENE-030131-3708	75.6	5.1e-29	324985	zgc:64072	GO:0003674	molecular_function	molecular_function	2
TRINITY_DN12353_c0_g1	ZFIN|ZDB-GENE-030131-3708	75.6	5.1e-29	324985	zgc:64072	GO:0005764	lysosome	cellular_component	8
TRINITY_DN12353_c0_g1	ZFIN|ZDB-GENE-030131-3708	75.6	5.1e-29	324985	zgc:64072	GO:0008150	biological_process	biological_process	2
TRINITY_DN12353_c0_g1	ZFIN|ZDB-GENE-030131-3708	75.6	5.1e-29	324985	zgc:64072	GO:0016020	membrane	cellular_component	3
TRINITY_DN12353_c0_g1	ZFIN|ZDB-GENE-030131-3708	75.6	5.1e-29	324985	zgc:64072	GO:0016021	integral component of membrane	cellular_component	5
TRINITY_DN12370_c0_g2	UNIPROTKB|K7KI11	100	1.1e-41	100816469	GLYMA_04G042400	GO:0004674	protein serine/threonine kinase activity	molecular_function	8
TRINITY_DN12370_c0_g2	UNIPROTKB|K7KI11	100	1.1e-41	100816469	GLYMA_04G042400	GO:0005886	plasma membrane	cellular_component	4
TRINITY_DN12370_c0_g2	UNIPROTKB|K7KI11	100	1.1e-41	100816469	GLYMA_04G042400	GO:0006468	protein phosphorylation	biological_process	9
TRINITY_DN12373_c0_g1	ZFIN|ZDB-GENE-030131-8599	100	4.9e-28	336655	icn	GO:0005509	calcium ion binding	molecular_function	7
TRINITY_DN12373_c0_g1	ZFIN|ZDB-GENE-030131-8599	100	4.9e-28	336655	icn	GO:0046872	metal ion binding	molecular_function	6
TRINITY_DN12373_c0_g1	ZFIN|ZDB-GENE-030131-8599	100	4.9e-28	336655	icn	GO:0046914	transition metal ion binding	molecular_function	7
TRINITY_DN12373_c0_g2	ZFIN|ZDB-GENE-030131-8599	75.7	6.4e-24	336655	icn	GO:0005509	calcium ion binding	molecular_function	7
TRINITY_DN12373_c0_g2	ZFIN|ZDB-GENE-030131-8599	75.7	6.4e-24	336655	icn	GO:0046872	metal ion binding	molecular_function	6
TRINITY_DN12373_c0_g2	ZFIN|ZDB-GENE-030131-8599	75.7	6.4e-24	336655	icn	GO:0046914	transition metal ion binding	molecular_function	7
TRINITY_DN12393_c0_g1	UNIPROTKB|O82113	97.6	9.5e-44	4336260	Os04g0493000	GO:0005634	nucleus	cellular_component	6
TRINITY_DN12393_c0_g1	UNIPROTKB|O82113	97.6	9.5e-44	4336260	Os04g0493000	GO:0006355	regulation of transcription, DNA-templated	biological_process	8
TRINITY_DN12393_c0_g1	UNIPROTKB|O82113	97.6	9.5e-44	4336260	Os04g0493000	GO:0009640	photomorphogenesis	biological_process	8
TRINITY_DN12413_c0_g1	TAIR|locus:2077071	73.4	7.9e-24	821819	PDF2	GO:0005737	cytoplasm	cellular_component	5
TRINITY_DN12413_c0_g1	TAIR|locus:2077071	73.4	7.9e-24	821819	PDF2	GO:0006457	protein folding	biological_process	4
TRINITY_DN12413_c0_g1	TAIR|locus:2077071	73.4	7.9e-24	821819	PDF2	GO:0016272	prefoldin complex	cellular_component	4
TRINITY_DN12413_c0_g1	TAIR|locus:2077071	73.4	7.9e-24	821819	PDF2	GO:0044183	protein binding involved in protein folding	molecular_function	3
TRINITY_DN12413_c0_g1	TAIR|locus:2077071	73.4	7.9e-24	821819	PDF2	GO:0051082	unfolded protein binding	molecular_function	5
TRINITY_DN12415_c0_g3	ZFIN|ZDB-GENE-030131-967	100	2.9e-10	322248	smarce1	GO:0003677	DNA binding	molecular_function	6
TRINITY_DN12415_c0_g3	ZFIN|ZDB-GENE-030131-967	100	2.9e-10	322248	smarce1	GO:0005634	nucleus	cellular_component	6
TRINITY_DN12415_c0_g3	ZFIN|ZDB-GENE-030131-967	100	2.9e-10	322248	smarce1	GO:0016514	SWI/SNF complex	cellular_component	8
TRINITY_DN12415_c0_g3	ZFIN|ZDB-GENE-030131-967	100	2.9e-10	322248	smarce1	GO:0043044	ATP-dependent chromatin remodeling	biological_process	7
TRINITY_DN12417_c0_g1	TAIR|locus:2045159	86.1	1.9e-27	817259	TTN7	GO:0000775	chromosome, centromeric region	cellular_component	7
TRINITY_DN12417_c0_g1	TAIR|locus:2045159	86.1	1.9e-27	817259	TTN7	GO:0000785	chromatin	cellular_component	6
TRINITY_DN12417_c0_g1	TAIR|locus:2045159	86.1	1.9e-27	817259	TTN7	GO:0003682	chromatin binding	molecular_function	4
TRINITY_DN12417_c0_g1	TAIR|locus:2045159	86.1	1.9e-27	817259	TTN7	GO:0005524	ATP binding	molecular_function	5
TRINITY_DN12417_c0_g1	TAIR|locus:2045159	86.1	1.9e-27	817259	TTN7	GO:0005634	nucleus	cellular_component	6
TRINITY_DN12417_c0_g1	TAIR|locus:2045159	86.1	1.9e-27	817259	TTN7	GO:0005737	cytoplasm	cellular_component	5
TRINITY_DN12417_c0_g1	TAIR|locus:2045159	86.1	1.9e-27	817259	TTN7	GO:0005819	spindle	cellular_component	6
TRINITY_DN12417_c0_g1	TAIR|locus:2045159	86.1	1.9e-27	817259	TTN7	GO:0006281	DNA repair	biological_process	8
TRINITY_DN12417_c0_g1	TAIR|locus:2045159	86.1	1.9e-27	817259	TTN7	GO:0007059	chromosome segregation	biological_process	4
TRINITY_DN12417_c0_g1	TAIR|locus:2045159	86.1	1.9e-27	817259	TTN7	GO:0007062	sister chromatid cohesion	biological_process	5
TRINITY_DN12417_c0_g1	TAIR|locus:2045159	86.1	1.9e-27	817259	TTN7	GO:0008278	cohesin complex	cellular_component	4
TRINITY_DN12417_c0_g1	TAIR|locus:2045159	86.1	1.9e-27	817259	TTN7	GO:0009506	plasmodesma	cellular_component	5
TRINITY_DN12417_c0_g1	TAIR|locus:2045159	86.1	1.9e-27	817259	TTN7	GO:0016363	nuclear matrix	cellular_component	6
TRINITY_DN12417_c0_g1	TAIR|locus:2045159	86.1	1.9e-27	817259	TTN7	GO:0051301	cell division	biological_process	4
TRINITY_DN12417_c0_g1	TAIR|locus:2045159	86.1	1.9e-27	817259	TTN7	GO:0051321	meiotic cell cycle	biological_process	5
TRINITY_DN12422_c0_g1	UNIPROTKB|Q5TKF4	100	1.4e-35	4339815	Os05g0595400	GO:0004550	nucleoside diphosphate kinase activity	molecular_function	7
TRINITY_DN12422_c0_g1	UNIPROTKB|Q5TKF4	100	1.4e-35	4339815	Os05g0595400	GO:0005622	intracellular	cellular_component	4
TRINITY_DN12422_c0_g1	UNIPROTKB|Q5TKF4	100	1.4e-35	4339815	Os05g0595400	GO:0006163	purine nucleotide metabolic process	biological_process	9
TRINITY_DN12422_c0_g1	UNIPROTKB|Q5TKF4	100	1.4e-35	4339815	Os05g0595400	GO:0006220	pyrimidine nucleotide metabolic process	biological_process	9
TRINITY_DN12422_c0_g1	UNIPROTKB|Q5TKF4	100	1.4e-35	4339815	Os05g0595400	GO:0009142	nucleoside triphosphate biosynthetic process	biological_process	9
TRINITY_DN12423_c0_g1	FB|FBgn0026250	90	5e-30	44260	eIF1A	GO:0003743	translation initiation factor activity	molecular_function	8
TRINITY_DN12423_c0_g1	FB|FBgn0026250	90	5e-30	44260	eIF1A	GO:0005654	nucleoplasm	cellular_component	6
TRINITY_DN12423_c0_g1	FB|FBgn0026250	90	5e-30	44260	eIF1A	GO:0005829	cytosol	cellular_component	6
TRINITY_DN12423_c0_g1	FB|FBgn0026250	90	5e-30	44260	eIF1A	GO:0006412	translation	biological_process	8
TRINITY_DN12423_c0_g1	FB|FBgn0026250	90	5e-30	44260	eIF1A	GO:0006413	translational initiation	biological_process	5
TRINITY_DN12423_c0_g1	FB|FBgn0026250	90	5e-30	44260	eIF1A	GO:0006909	phagocytosis	biological_process	7
TRINITY_DN12423_c0_g1	FB|FBgn0026250	90	5e-30	44260	eIF1A	GO:0007224	smoothened signaling pathway	biological_process	6
TRINITY_DN12423_c0_g1	FB|FBgn0026250	90	5e-30	44260	eIF1A	GO:0016282	eukaryotic 43S preinitiation complex	cellular_component	7
TRINITY_DN12428_c0_g2	TAIR|locus:2080560	82.9	1.8e-186	824861	CRD1	GO:0003677	DNA binding	molecular_function	6
TRINITY_DN12428_c0_g2	TAIR|locus:2080560	82.9	1.8e-186	824861	CRD1	GO:0005515	protein binding	molecular_function	4
TRINITY_DN12428_c0_g2	TAIR|locus:2080560	82.9	1.8e-186	824861	CRD1	GO:0009507	chloroplast	cellular_component	7
TRINITY_DN12428_c0_g2	TAIR|locus:2080560	82.9	1.8e-186	824861	CRD1	GO:0009534	chloroplast thylakoid	cellular_component	7
TRINITY_DN12428_c0_g2	TAIR|locus:2080560	82.9	1.8e-186	824861	CRD1	GO:0009535	chloroplast thylakoid membrane	cellular_component	8
TRINITY_DN12428_c0_g2	TAIR|locus:2080560	82.9	1.8e-186	824861	CRD1	GO:0009658	chloroplast organization	biological_process	7
TRINITY_DN12428_c0_g2	TAIR|locus:2080560	82.9	1.8e-186	824861	CRD1	GO:0009706	chloroplast inner membrane	cellular_component	7
TRINITY_DN12428_c0_g2	TAIR|locus:2080560	82.9	1.8e-186	824861	CRD1	GO:0009941	chloroplast envelope	cellular_component	7
TRINITY_DN12428_c0_g2	TAIR|locus:2080560	82.9	1.8e-186	824861	CRD1	GO:0015979	photosynthesis	biological_process	5
TRINITY_DN12428_c0_g2	TAIR|locus:2080560	82.9	1.8e-186	824861	CRD1	GO:0015995	chlorophyll biosynthetic process	biological_process	9
TRINITY_DN12428_c0_g2	TAIR|locus:2080560	82.9	1.8e-186	824861	CRD1	GO:0046872	metal ion binding	molecular_function	6
TRINITY_DN12428_c0_g2	TAIR|locus:2080560	82.9	1.8e-186	824861	CRD1	GO:0048529	magnesium-protoporphyrin IX monomethyl ester (oxidative) cyclase activity	molecular_function	7
TRINITY_DN12428_c0_g2	TAIR|locus:2080560	82.9	1.8e-186	824861	CRD1	GO:0055114	oxidation-reduction process	biological_process	4
TRINITY_DN12428_c0_g2	TAIR|locus:2080560	82.9	1.8e-186	824861	CRD1	GO:1901401	regulation of tetrapyrrole metabolic process	biological_process	7
TRINITY_DN12434_c0_g1	TAIR|locus:2065134	48.1	4.6e-11	819340	UPB1	GO:0003677	DNA binding	molecular_function	6
TRINITY_DN12434_c0_g1	TAIR|locus:2065134	48.1	4.6e-11	819340	UPB1	GO:0003700	DNA binding transcription factor activity	molecular_function	4
TRINITY_DN12434_c0_g1	TAIR|locus:2065134	48.1	4.6e-11	819340	UPB1	GO:0005634	nucleus	cellular_component	6
TRINITY_DN12434_c0_g1	TAIR|locus:2065134	48.1	4.6e-11	819340	UPB1	GO:0006351	transcription, DNA-templated	biological_process	8
TRINITY_DN12434_c0_g1	TAIR|locus:2065134	48.1	4.6e-11	819340	UPB1	GO:0006355	regulation of transcription, DNA-templated	biological_process	8
TRINITY_DN12434_c0_g1	TAIR|locus:2065134	48.1	4.6e-11	819340	UPB1	GO:0030154	cell differentiation	biological_process	5
TRINITY_DN12434_c0_g1	TAIR|locus:2065134	48.1	4.6e-11	819340	UPB1	GO:0046983	protein dimerization activity	molecular_function	5
TRINITY_DN12434_c0_g1	TAIR|locus:2065134	48.1	4.6e-11	819340	UPB1	GO:2000280	regulation of root development	biological_process	7
TRINITY_DN12453_c0_g2	ZFIN|ZDB-GENE-990415-18	75.9	1.9e-32	30216	hbba1	GO:0001666	response to hypoxia	biological_process	5
TRINITY_DN12453_c0_g2	ZFIN|ZDB-GENE-990415-18	75.9	1.9e-32	30216	hbba1	GO:0005344	oxygen carrier activity	molecular_function	4
TRINITY_DN12453_c0_g2	ZFIN|ZDB-GENE-990415-18	75.9	1.9e-32	30216	hbba1	GO:0005506	iron ion binding	molecular_function	8
TRINITY_DN12453_c0_g2	ZFIN|ZDB-GENE-990415-18	75.9	1.9e-32	30216	hbba1	GO:0005833	hemoglobin complex	cellular_component	4
TRINITY_DN12453_c0_g2	ZFIN|ZDB-GENE-990415-18	75.9	1.9e-32	30216	hbba1	GO:0015671	oxygen transport	biological_process	7
TRINITY_DN12453_c0_g2	ZFIN|ZDB-GENE-990415-18	75.9	1.9e-32	30216	hbba1	GO:0019825	oxygen binding	molecular_function	5
TRINITY_DN12453_c0_g2	ZFIN|ZDB-GENE-990415-18	75.9	1.9e-32	30216	hbba1	GO:0020037	heme binding	molecular_function	6
TRINITY_DN12453_c0_g2	ZFIN|ZDB-GENE-990415-18	75.9	1.9e-32	30216	hbba1	GO:0030097	hemopoiesis	biological_process	7
TRINITY_DN12453_c0_g2	ZFIN|ZDB-GENE-990415-18	75.9	1.9e-32	30216	hbba1	GO:0046872	metal ion binding	molecular_function	6
TRINITY_DN12455_c0_g1	ZFIN|ZDB-GENE-030131-2173	100	3.6e-37	323453	eif4g2a	GO:0003723	RNA binding	molecular_function	6
TRINITY_DN12455_c0_g1	ZFIN|ZDB-GENE-030131-2173	100	3.6e-37	323453	eif4g2a	GO:0005575	cellular_component	cellular_component	2
TRINITY_DN12455_c0_g1	ZFIN|ZDB-GENE-030131-2173	100	3.6e-37	323453	eif4g2a	GO:0007498	mesoderm development	biological_process	6
TRINITY_DN12468_c0_g1	TAIR|locus:2204604	52.7	1.2e-16	839950	AtBBE8	GO:0005576	extracellular region	cellular_component	3
TRINITY_DN12468_c0_g1	TAIR|locus:2204604	52.7	1.2e-16	839950	AtBBE8	GO:0009055	electron transfer activity	molecular_function	5
TRINITY_DN12468_c0_g1	TAIR|locus:2204604	52.7	1.2e-16	839950	AtBBE8	GO:0009507	chloroplast	cellular_component	7
TRINITY_DN12468_c0_g1	TAIR|locus:2204604	52.7	1.2e-16	839950	AtBBE8	GO:0016614	oxidoreductase activity, acting on CH-OH group of donors	molecular_function	5
TRINITY_DN12468_c0_g1	TAIR|locus:2204604	52.7	1.2e-16	839950	AtBBE8	GO:0050660	flavin adenine dinucleotide binding	molecular_function	6
TRINITY_DN12468_c0_g1	TAIR|locus:2204604	52.7	1.2e-16	839950	AtBBE8	GO:0055114	oxidation-reduction process	biological_process	4
TRINITY_DN12486_c0_g1	UNIPROTKB|Q60LV4	83.6	7.6e-29	8578694	myo-3	GO:0003774	motor activity	molecular_function	9
TRINITY_DN12486_c0_g1	UNIPROTKB|Q60LV4	83.6	7.6e-29	8578694	myo-3	GO:0007626	locomotory behavior	biological_process	4
TRINITY_DN12486_c0_g1	UNIPROTKB|Q60LV4	83.6	7.6e-29	8578694	myo-3	GO:0031672	A band	cellular_component	5
TRINITY_DN12497_c0_g1	UNIPROTKB|I1JNR3	100	6.7e-18	100791600	GLYMA_03G150600	GO:0003746	translation elongation factor activity	molecular_function	8
TRINITY_DN12497_c0_g1	UNIPROTKB|I1JNR3	100	6.7e-18	100791600	GLYMA_03G150600	GO:0003924	GTPase activity	molecular_function	9
TRINITY_DN12497_c0_g1	UNIPROTKB|I1JNR3	100	6.7e-18	100791600	GLYMA_03G150600	GO:0005622	intracellular	cellular_component	4
TRINITY_DN12497_c0_g1	UNIPROTKB|I1JNR3	100	6.7e-18	100791600	GLYMA_03G150600	GO:0006414	translational elongation	biological_process	8
TRINITY_DN124_c0_g1	ZFIN|ZDB-GENE-040426-1924	81.5	7.2e-24	-	agpat4	GO:0008152	metabolic process	biological_process	3
TRINITY_DN124_c0_g1	ZFIN|ZDB-GENE-040426-1924	81.5	7.2e-24	-	agpat4	GO:0016020	membrane	cellular_component	3
TRINITY_DN124_c0_g1	ZFIN|ZDB-GENE-040426-1924	81.5	7.2e-24	-	agpat4	GO:0016021	integral component of membrane	cellular_component	5
TRINITY_DN124_c0_g1	ZFIN|ZDB-GENE-040426-1924	81.5	7.2e-24	-	agpat4	GO:0016740	transferase activity	molecular_function	4
TRINITY_DN124_c0_g1	ZFIN|ZDB-GENE-040426-1924	81.5	7.2e-24	-	agpat4	GO:0016746	transferase activity, transferring acyl groups	molecular_function	5
TRINITY_DN12512_c0_g1	TAIR|locus:2147314	63.4	1.3e-07	835539	DFL1	GO:0005737	cytoplasm	cellular_component	5
TRINITY_DN12512_c0_g1	TAIR|locus:2147314	63.4	1.3e-07	835539	DFL1	GO:0009507	chloroplast	cellular_component	7
TRINITY_DN12512_c0_g1	TAIR|locus:2147314	63.4	1.3e-07	835539	DFL1	GO:0009733	response to auxin	biological_process	6
TRINITY_DN12512_c0_g1	TAIR|locus:2147314	63.4	1.3e-07	835539	DFL1	GO:0009734	auxin-activated signaling pathway	biological_process	6
TRINITY_DN12512_c0_g1	TAIR|locus:2147314	63.4	1.3e-07	835539	DFL1	GO:0009826	unidimensional cell growth	biological_process	7
TRINITY_DN12512_c0_g1	TAIR|locus:2147314	63.4	1.3e-07	835539	DFL1	GO:0010252	auxin homeostasis	biological_process	7
TRINITY_DN12512_c0_g1	TAIR|locus:2147314	63.4	1.3e-07	835539	DFL1	GO:0010279	indole-3-acetic acid amido synthetase activity	molecular_function	7
TRINITY_DN12530_c0_g1	UNIPROTKB|I1L0U6	100	1.1e-39	100780020	GLYMA_09G039600	GO:0005643	nuclear pore	cellular_component	4
TRINITY_DN12530_c0_g1	UNIPROTKB|I1L0U6	100	1.1e-39	100780020	GLYMA_09G039600	GO:0005654	nucleoplasm	cellular_component	6
TRINITY_DN12530_c0_g1	UNIPROTKB|I1L0U6	100	1.1e-39	100780020	GLYMA_09G039600	GO:0005829	cytosol	cellular_component	6
TRINITY_DN12530_c0_g1	UNIPROTKB|I1L0U6	100	1.1e-39	100780020	GLYMA_09G039600	GO:0006607	NLS-bearing protein import into nucleus	biological_process	12
TRINITY_DN12530_c0_g1	UNIPROTKB|I1L0U6	100	1.1e-39	100780020	GLYMA_09G039600	GO:0008139	nuclear localization sequence binding	molecular_function	7
TRINITY_DN12550_c0_g1	ZFIN|ZDB-GENE-040426-1235	97.6	6.5e-37	393880	vps4b	GO:0000166	nucleotide binding	molecular_function	5
TRINITY_DN12550_c0_g1	ZFIN|ZDB-GENE-040426-1235	97.6	6.5e-37	393880	vps4b	GO:0005524	ATP binding	molecular_function	5
TRINITY_DN12550_c0_g1	ZFIN|ZDB-GENE-040426-1235	97.6	6.5e-37	393880	vps4b	GO:0005634	nucleus	cellular_component	6
TRINITY_DN12550_c0_g1	ZFIN|ZDB-GENE-040426-1235	97.6	6.5e-37	393880	vps4b	GO:0016887	ATPase activity	molecular_function	9
TRINITY_DN12550_c0_g1	ZFIN|ZDB-GENE-040426-1235	97.6	6.5e-37	393880	vps4b	GO:0042476	odontogenesis	biological_process	6
TRINITY_DN12564_c0_g1	UNIPROTKB|I1JFS9	100	2.5e-38	100792812	GLYMA_08G312300	GO:0004834	tryptophan synthase activity	molecular_function	7
TRINITY_DN12564_c0_g1	UNIPROTKB|I1JFS9	100	2.5e-38	100792812	GLYMA_08G312300	GO:0005737	cytoplasm	cellular_component	5
TRINITY_DN12564_c0_g1	UNIPROTKB|I1JFS9	100	2.5e-38	100792812	GLYMA_08G312300	GO:0030170	pyridoxal phosphate binding	molecular_function	6
TRINITY_DN1256_c0_g1	ZFIN|ZDB-GENE-050411-58	53	1.5e-27	100007792	itln2	GO:0005575	cellular_component	cellular_component	2
TRINITY_DN1256_c0_g1	ZFIN|ZDB-GENE-050411-58	53	1.5e-27	100007792	itln2	GO:0043152	induction of bacterial agglutination	biological_process	8
TRINITY_DN12586_c0_g1	UNIPROTKB|Q2QWV1	100	4.5e-37	4351676	Os12g0181600	GO:0003333	amino acid transmembrane transport	biological_process	11
TRINITY_DN12586_c0_g1	UNIPROTKB|Q2QWV1	100	4.5e-37	4351676	Os12g0181600	GO:0005886	plasma membrane	cellular_component	4
TRINITY_DN12586_c0_g1	UNIPROTKB|Q2QWV1	100	4.5e-37	4351676	Os12g0181600	GO:0015171	amino acid transmembrane transporter activity	molecular_function	7
TRINITY_DN12594_c0_g1	UNIPROTKB|Q01628	100	2.5e-37	10410	IFITM3	GO:0005515	protein binding	molecular_function	4
TRINITY_DN12594_c0_g1	UNIPROTKB|Q01628	100	2.5e-37	10410	IFITM3	GO:0005765	lysosomal membrane	cellular_component	9
TRINITY_DN12594_c0_g1	UNIPROTKB|Q01628	100	2.5e-37	10410	IFITM3	GO:0005886	plasma membrane	cellular_component	4
TRINITY_DN12594_c0_g1	UNIPROTKB|Q01628	100	2.5e-37	10410	IFITM3	GO:0006955	immune response	biological_process	4
TRINITY_DN12594_c0_g1	UNIPROTKB|Q01628	100	2.5e-37	10410	IFITM3	GO:0009615	response to virus	biological_process	7
TRINITY_DN12594_c0_g1	UNIPROTKB|Q01628	100	2.5e-37	10410	IFITM3	GO:0016021	integral component of membrane	cellular_component	5
TRINITY_DN12594_c0_g1	UNIPROTKB|Q01628	100	2.5e-37	10410	IFITM3	GO:0031902	late endosome membrane	cellular_component	9
TRINITY_DN12594_c0_g1	UNIPROTKB|Q01628	100	2.5e-37	10410	IFITM3	GO:0032897	negative regulation of viral transcription	biological_process	9
TRINITY_DN12594_c0_g1	UNIPROTKB|Q01628	100	2.5e-37	10410	IFITM3	GO:0034341	response to interferon-gamma	biological_process	7
TRINITY_DN12594_c0_g1	UNIPROTKB|Q01628	100	2.5e-37	10410	IFITM3	GO:0035455	response to interferon-alpha	biological_process	7
TRINITY_DN12594_c0_g1	UNIPROTKB|Q01628	100	2.5e-37	10410	IFITM3	GO:0035456	response to interferon-beta	biological_process	7
TRINITY_DN12594_c0_g1	UNIPROTKB|Q01628	100	2.5e-37	10410	IFITM3	GO:0045071	negative regulation of viral genome replication	biological_process	10
TRINITY_DN12594_c0_g1	UNIPROTKB|Q01628	100	2.5e-37	10410	IFITM3	GO:0046597	negative regulation of viral entry into host cell	biological_process	10
TRINITY_DN12594_c0_g1	UNIPROTKB|Q01628	100	2.5e-37	10410	IFITM3	GO:0051607	defense response to virus	biological_process	5
TRINITY_DN12594_c0_g1	UNIPROTKB|Q01628	100	2.5e-37	10410	IFITM3	GO:0060337	type I interferon signaling pathway	biological_process	7
TRINITY_DN12594_c0_g1	UNIPROTKB|Q01628	100	2.5e-37	10410	IFITM3	GO:0070062	extracellular exosome	cellular_component	7
TRINITY_DN12594_c0_g2	UNIPROTKB|E9PS44	100	9e-28	-	IFITM3	GO:0009607	response to biotic stimulus	biological_process	4
TRINITY_DN12594_c0_g2	UNIPROTKB|E9PS44	100	9e-28	-	IFITM3	GO:0016021	integral component of membrane	cellular_component	5
TRINITY_DN12594_c0_g3	MGI|MGI:1913391	100	1e-39	66141	Ifitm3	GO:0002376	immune system process	biological_process	3
TRINITY_DN12594_c0_g3	MGI|MGI:1913391	100	1e-39	66141	Ifitm3	GO:0005634	nucleus	cellular_component	6
TRINITY_DN12594_c0_g3	MGI|MGI:1913391	100	1e-39	66141	Ifitm3	GO:0005737	cytoplasm	cellular_component	5
TRINITY_DN12594_c0_g3	MGI|MGI:1913391	100	1e-39	66141	Ifitm3	GO:0005764	lysosome	cellular_component	8
TRINITY_DN12594_c0_g3	MGI|MGI:1913391	100	1e-39	66141	Ifitm3	GO:0005768	endosome	cellular_component	7
TRINITY_DN12594_c0_g3	MGI|MGI:1913391	100	1e-39	66141	Ifitm3	GO:0005783	endoplasmic reticulum	cellular_component	6
TRINITY_DN12594_c0_g3	MGI|MGI:1913391	100	1e-39	66141	Ifitm3	GO:0005886	plasma membrane	cellular_component	4
TRINITY_DN12594_c0_g3	MGI|MGI:1913391	100	1e-39	66141	Ifitm3	GO:0006898	receptor-mediated endocytosis	biological_process	8
TRINITY_DN12594_c0_g3	MGI|MGI:1913391	100	1e-39	66141	Ifitm3	GO:0008285	negative regulation of cell proliferation	biological_process	7
TRINITY_DN12594_c0_g3	MGI|MGI:1913391	100	1e-39	66141	Ifitm3	GO:0009607	response to biotic stimulus	biological_process	4
TRINITY_DN12594_c0_g3	MGI|MGI:1913391	100	1e-39	66141	Ifitm3	GO:0009615	response to virus	biological_process	7
TRINITY_DN12594_c0_g3	MGI|MGI:1913391	100	1e-39	66141	Ifitm3	GO:0009986	cell surface	cellular_component	4
TRINITY_DN12594_c0_g3	MGI|MGI:1913391	100	1e-39	66141	Ifitm3	GO:0016020	membrane	cellular_component	3
TRINITY_DN12594_c0_g3	MGI|MGI:1913391	100	1e-39	66141	Ifitm3	GO:0016021	integral component of membrane	cellular_component	5
TRINITY_DN12594_c0_g3	MGI|MGI:1913391	100	1e-39	66141	Ifitm3	GO:0031410	cytoplasmic vesicle	cellular_component	6
TRINITY_DN12594_c0_g3	MGI|MGI:1913391	100	1e-39	66141	Ifitm3	GO:0032897	negative regulation of viral transcription	biological_process	9
TRINITY_DN12594_c0_g3	MGI|MGI:1913391	100	1e-39	66141	Ifitm3	GO:0034341	response to interferon-gamma	biological_process	7
TRINITY_DN12594_c0_g3	MGI|MGI:1913391	100	1e-39	66141	Ifitm3	GO:0035455	response to interferon-alpha	biological_process	7
TRINITY_DN12594_c0_g3	MGI|MGI:1913391	100	1e-39	66141	Ifitm3	GO:0035456	response to interferon-beta	biological_process	7
TRINITY_DN12594_c0_g3	MGI|MGI:1913391	100	1e-39	66141	Ifitm3	GO:0045071	negative regulation of viral genome replication	biological_process	10
TRINITY_DN12594_c0_g3	MGI|MGI:1913391	100	1e-39	66141	Ifitm3	GO:0045087	innate immune response	biological_process	5
TRINITY_DN12594_c0_g3	MGI|MGI:1913391	100	1e-39	66141	Ifitm3	GO:0045177	apical part of cell	cellular_component	4
TRINITY_DN12594_c0_g3	MGI|MGI:1913391	100	1e-39	66141	Ifitm3	GO:0046597	negative regulation of viral entry into host cell	biological_process	10
TRINITY_DN12594_c0_g3	MGI|MGI:1913391	100	1e-39	66141	Ifitm3	GO:0051607	defense response to virus	biological_process	5
TRINITY_DN12594_c0_g3	MGI|MGI:1913391	100	1e-39	66141	Ifitm3	GO:0060337	type I interferon signaling pathway	biological_process	7
TRINITY_DN12622_c0_g1	TAIR|locus:2100484	73.9	2.8e-23	823969	AT3G48140	GO:0003674	molecular_function	molecular_function	2
TRINITY_DN12622_c0_g1	TAIR|locus:2100484	73.9	2.8e-23	823969	AT3G48140	GO:0005739	mitochondrion	cellular_component	6
TRINITY_DN12622_c0_g1	TAIR|locus:2100484	73.9	2.8e-23	823969	AT3G48140	GO:0005777	peroxisome	cellular_component	7
TRINITY_DN12622_c0_g1	TAIR|locus:2100484	73.9	2.8e-23	823969	AT3G48140	GO:0010150	leaf senescence	biological_process	6
TRINITY_DN12622_c0_g1	TAIR|locus:2100484	73.9	2.8e-23	823969	AT3G48140	GO:0016021	integral component of membrane	cellular_component	5
TRINITY_DN12633_c0_g1	TAIR|locus:2171544	56.8	3.6e-07	834771	NUDT8	GO:0005829	cytosol	cellular_component	6
TRINITY_DN12633_c0_g1	TAIR|locus:2171544	56.8	3.6e-07	834771	NUDT8	GO:0009611	response to wounding	biological_process	5
TRINITY_DN12633_c0_g1	TAIR|locus:2171544	56.8	3.6e-07	834771	NUDT8	GO:0016787	hydrolase activity	molecular_function	4
TRINITY_DN12633_c0_g1	TAIR|locus:2171544	56.8	3.6e-07	834771	NUDT8	GO:0046872	metal ion binding	molecular_function	6
TRINITY_DN12636_c0_g2	WB|WBGene00010556	86.8	4e-36	177895	rack-1	GO:0000281	mitotic cytokinesis	biological_process	7
TRINITY_DN12636_c0_g2	WB|WBGene00010556	86.8	4e-36	177895	rack-1	GO:0000776	kinetochore	cellular_component	4
TRINITY_DN12636_c0_g2	WB|WBGene00010556	86.8	4e-36	177895	rack-1	GO:0001934	positive regulation of protein phosphorylation	biological_process	10
TRINITY_DN12636_c0_g2	WB|WBGene00010556	86.8	4e-36	177895	rack-1	GO:0005080	protein kinase C binding	molecular_function	8
TRINITY_DN12636_c0_g2	WB|WBGene00010556	86.8	4e-36	177895	rack-1	GO:0005515	protein binding	molecular_function	4
TRINITY_DN12636_c0_g2	WB|WBGene00010556	86.8	4e-36	177895	rack-1	GO:0005634	nucleus	cellular_component	6
TRINITY_DN12636_c0_g2	WB|WBGene00010556	86.8	4e-36	177895	rack-1	GO:0005635	nuclear envelope	cellular_component	6
TRINITY_DN12636_c0_g2	WB|WBGene00010556	86.8	4e-36	177895	rack-1	GO:0005737	cytoplasm	cellular_component	5
TRINITY_DN12636_c0_g2	WB|WBGene00010556	86.8	4e-36	177895	rack-1	GO:0005813	centrosome	cellular_component	7
TRINITY_DN12636_c0_g2	WB|WBGene00010556	86.8	4e-36	177895	rack-1	GO:0005829	cytosol	cellular_component	6
TRINITY_DN12636_c0_g2	WB|WBGene00010556	86.8	4e-36	177895	rack-1	GO:0005840	ribosome	cellular_component	6
TRINITY_DN12636_c0_g2	WB|WBGene00010556	86.8	4e-36	177895	rack-1	GO:0008045	motor neuron axon guidance	biological_process	7
TRINITY_DN12636_c0_g2	WB|WBGene00010556	86.8	4e-36	177895	rack-1	GO:0009792	embryo development ending in birth or egg hatching	biological_process	6
TRINITY_DN12636_c0_g2	WB|WBGene00010556	86.8	4e-36	177895	rack-1	GO:0019899	enzyme binding	molecular_function	5
TRINITY_DN12636_c0_g2	WB|WBGene00010556	86.8	4e-36	177895	rack-1	GO:0022627	cytosolic small ribosomal subunit	cellular_component	8
TRINITY_DN12636_c0_g2	WB|WBGene00010556	86.8	4e-36	177895	rack-1	GO:0030334	regulation of cell migration	biological_process	7
TRINITY_DN12636_c0_g2	WB|WBGene00010556	86.8	4e-36	177895	rack-1	GO:0030424	axon	cellular_component	6
TRINITY_DN12636_c0_g2	WB|WBGene00010556	86.8	4e-36	177895	rack-1	GO:0030426	growth cone	cellular_component	5
TRINITY_DN12636_c0_g2	WB|WBGene00010556	86.8	4e-36	177895	rack-1	GO:0033365	protein localization to organelle	biological_process	7
TRINITY_DN12636_c0_g2	WB|WBGene00010556	86.8	4e-36	177895	rack-1	GO:0040038	polar body extrusion after meiotic divisions	biological_process	5
TRINITY_DN12636_c0_g2	WB|WBGene00010556	86.8	4e-36	177895	rack-1	GO:0043022	ribosome binding	molecular_function	6
TRINITY_DN12636_c0_g2	WB|WBGene00010556	86.8	4e-36	177895	rack-1	GO:0044297	cell body	cellular_component	4
TRINITY_DN12636_c0_g2	WB|WBGene00010556	86.8	4e-36	177895	rack-1	GO:0050832	defense response to fungus	biological_process	8
TRINITY_DN12636_c0_g2	WB|WBGene00010556	86.8	4e-36	177895	rack-1	GO:0051304	chromosome separation	biological_process	5
TRINITY_DN12636_c0_g2	WB|WBGene00010556	86.8	4e-36	177895	rack-1	GO:0072344	rescue of stalled ribosome	biological_process	9
TRINITY_DN12643_c0_g1	UNIPROTKB|P02272	100	6.7e-20	426617	H2AFV	GO:0000786	nucleosome	cellular_component	5
TRINITY_DN12643_c0_g1	UNIPROTKB|P02272	100	6.7e-20	426617	H2AFV	GO:0000790	nuclear chromatin	cellular_component	7
TRINITY_DN12643_c0_g1	UNIPROTKB|P02272	100	6.7e-20	426617	H2AFV	GO:0003677	DNA binding	molecular_function	6
TRINITY_DN12643_c0_g1	UNIPROTKB|P02272	100	6.7e-20	426617	H2AFV	GO:0006342	chromatin silencing	biological_process	5
TRINITY_DN12643_c0_g1	UNIPROTKB|P02272	100	6.7e-20	426617	H2AFV	GO:0046982	protein heterodimerization activity	molecular_function	6
TRINITY_DN12653_c0_g1	ZFIN|ZDB-GENE-030131-8670	94	1.3e-24	336726	rpl27a	GO:0003735	structural constituent of ribosome	molecular_function	4
TRINITY_DN12653_c0_g1	ZFIN|ZDB-GENE-030131-8670	94	1.3e-24	336726	rpl27a	GO:0005622	intracellular	cellular_component	4
TRINITY_DN12653_c0_g1	ZFIN|ZDB-GENE-030131-8670	94	1.3e-24	336726	rpl27a	GO:0005840	ribosome	cellular_component	6
TRINITY_DN12653_c0_g1	ZFIN|ZDB-GENE-030131-8670	94	1.3e-24	336726	rpl27a	GO:0006412	translation	biological_process	8
TRINITY_DN12653_c0_g1	ZFIN|ZDB-GENE-030131-8670	94	1.3e-24	336726	rpl27a	GO:0015934	large ribosomal subunit	cellular_component	7
TRINITY_DN12653_c0_g2	ZFIN|ZDB-GENE-030131-8670	100	1.2e-34	336726	rpl27a	GO:0003735	structural constituent of ribosome	molecular_function	4
TRINITY_DN12653_c0_g2	ZFIN|ZDB-GENE-030131-8670	100	1.2e-34	336726	rpl27a	GO:0005622	intracellular	cellular_component	4
TRINITY_DN12653_c0_g2	ZFIN|ZDB-GENE-030131-8670	100	1.2e-34	336726	rpl27a	GO:0005840	ribosome	cellular_component	6
TRINITY_DN12653_c0_g2	ZFIN|ZDB-GENE-030131-8670	100	1.2e-34	336726	rpl27a	GO:0006412	translation	biological_process	8
TRINITY_DN12653_c0_g2	ZFIN|ZDB-GENE-030131-8670	100	1.2e-34	336726	rpl27a	GO:0015934	large ribosomal subunit	cellular_component	7
TRINITY_DN12671_c0_g1	TAIR|locus:2129251	89.6	2.8e-30	827027	SHM4	GO:0004372	glycine hydroxymethyltransferase activity	molecular_function	7
TRINITY_DN12671_c0_g1	TAIR|locus:2129251	89.6	2.8e-30	827027	SHM4	GO:0005515	protein binding	molecular_function	4
TRINITY_DN12671_c0_g1	TAIR|locus:2129251	89.6	2.8e-30	827027	SHM4	GO:0005737	cytoplasm	cellular_component	5
TRINITY_DN12671_c0_g1	TAIR|locus:2129251	89.6	2.8e-30	827027	SHM4	GO:0005829	cytosol	cellular_component	6
TRINITY_DN12671_c0_g1	TAIR|locus:2129251	89.6	2.8e-30	827027	SHM4	GO:0005886	plasma membrane	cellular_component	4
TRINITY_DN12671_c0_g1	TAIR|locus:2129251	89.6	2.8e-30	827027	SHM4	GO:0006544	glycine metabolic process	biological_process	11
TRINITY_DN12671_c0_g1	TAIR|locus:2129251	89.6	2.8e-30	827027	SHM4	GO:0006563	L-serine metabolic process	biological_process	11
TRINITY_DN12671_c0_g1	TAIR|locus:2129251	89.6	2.8e-30	827027	SHM4	GO:0007623	circadian rhythm	biological_process	4
TRINITY_DN12671_c0_g1	TAIR|locus:2129251	89.6	2.8e-30	827027	SHM4	GO:0009506	plasmodesma	cellular_component	5
TRINITY_DN12671_c0_g1	TAIR|locus:2129251	89.6	2.8e-30	827027	SHM4	GO:0016020	membrane	cellular_component	3
TRINITY_DN12671_c0_g1	TAIR|locus:2129251	89.6	2.8e-30	827027	SHM4	GO:0019264	glycine biosynthetic process from serine	biological_process	13
TRINITY_DN12671_c0_g1	TAIR|locus:2129251	89.6	2.8e-30	827027	SHM4	GO:0030170	pyridoxal phosphate binding	molecular_function	6
TRINITY_DN12671_c0_g1	TAIR|locus:2129251	89.6	2.8e-30	827027	SHM4	GO:0035999	tetrahydrofolate interconversion	biological_process	6
TRINITY_DN12671_c0_g1	TAIR|locus:2129251	89.6	2.8e-30	827027	SHM4	GO:0046686	response to cadmium ion	biological_process	7
TRINITY_DN12711_c0_g1	UNIPROTKB|I1NG74	46.1	1.8e-56	-	GLYMA_20G139300	GO:0004674	protein serine/threonine kinase activity	molecular_function	8
TRINITY_DN12711_c0_g1	UNIPROTKB|I1NG74	46.1	1.8e-56	-	GLYMA_20G139300	GO:0005886	plasma membrane	cellular_component	4
TRINITY_DN12711_c0_g1	UNIPROTKB|I1NG74	46.1	1.8e-56	-	GLYMA_20G139300	GO:0006468	protein phosphorylation	biological_process	9
TRINITY_DN12711_c0_g1	UNIPROTKB|I1NG74	46.1	1.8e-56	-	GLYMA_20G139300	GO:0009506	plasmodesma	cellular_component	5
TRINITY_DN12711_c0_g1	UNIPROTKB|I1NG74	46.1	1.8e-56	-	GLYMA_20G139300	GO:0042742	defense response to bacterium	biological_process	8
TRINITY_DN12714_c0_g1	TAIR|locus:2163976	88.4	3.1e-42	836504	RSW3	GO:0004553	hydrolase activity, hydrolyzing O-glycosyl compounds	molecular_function	6
TRINITY_DN12714_c0_g1	TAIR|locus:2163976	88.4	3.1e-42	836504	RSW3	GO:0005576	extracellular region	cellular_component	3
TRINITY_DN12714_c0_g1	TAIR|locus:2163976	88.4	3.1e-42	836504	RSW3	GO:0005783	endoplasmic reticulum	cellular_component	6
TRINITY_DN12714_c0_g1	TAIR|locus:2163976	88.4	3.1e-42	836504	RSW3	GO:0005975	carbohydrate metabolic process	biological_process	5
TRINITY_DN12714_c0_g1	TAIR|locus:2163976	88.4	3.1e-42	836504	RSW3	GO:0009507	chloroplast	cellular_component	7
TRINITY_DN12714_c0_g1	TAIR|locus:2163976	88.4	3.1e-42	836504	RSW3	GO:0009826	unidimensional cell growth	biological_process	7
TRINITY_DN12714_c0_g1	TAIR|locus:2163976	88.4	3.1e-42	836504	RSW3	GO:0015926	glucosidase activity	molecular_function	7
TRINITY_DN12714_c0_g1	TAIR|locus:2163976	88.4	3.1e-42	836504	RSW3	GO:0030244	cellulose biosynthetic process	biological_process	11
TRINITY_DN12714_c0_g1	TAIR|locus:2163976	88.4	3.1e-42	836504	RSW3	GO:0030246	carbohydrate binding	molecular_function	4
TRINITY_DN12714_c0_g1	TAIR|locus:2163976	88.4	3.1e-42	836504	RSW3	GO:0033919	glucan 1,3-alpha-glucosidase activity	molecular_function	10
TRINITY_DN12714_c0_g1	TAIR|locus:2163976	88.4	3.1e-42	836504	RSW3	GO:0042742	defense response to bacterium	biological_process	8
TRINITY_DN12714_c0_g1	TAIR|locus:2163976	88.4	3.1e-42	836504	RSW3	GO:0046686	response to cadmium ion	biological_process	7
TRINITY_DN12715_c0_g2	UNIPROTKB|I1N9C4	78.8	4.5e-21	-	GLYMA_19G151300	GO:0009699	phenylpropanoid biosynthetic process	biological_process	7
TRINITY_DN12715_c0_g2	UNIPROTKB|I1N9C4	78.8	4.5e-21	-	GLYMA_19G151300	GO:0042349	guiding stereospecific synthesis activity	molecular_function	5
TRINITY_DN12720_c0_g1	UNIPROTKB|I1NFQ2	100	7.3e-26	100785459	GLYMA_20G121300	GO:0005887	integral component of plasma membrane	cellular_component	6
TRINITY_DN12720_c0_g1	UNIPROTKB|I1NFQ2	100	7.3e-26	100785459	GLYMA_20G121300	GO:0006644	phospholipid metabolic process	biological_process	7
TRINITY_DN12720_c0_g1	UNIPROTKB|I1NFQ2	100	7.3e-26	100785459	GLYMA_20G121300	GO:0007165	signal transduction	biological_process	4
TRINITY_DN12720_c0_g1	UNIPROTKB|I1NFQ2	100	7.3e-26	100785459	GLYMA_20G121300	GO:0008195	phosphatidate phosphatase activity	molecular_function	8
TRINITY_DN12720_c0_g1	UNIPROTKB|I1NFQ2	100	7.3e-26	100785459	GLYMA_20G121300	GO:0046839	phospholipid dephosphorylation	biological_process	8
TRINITY_DN12734_c0_g1	ZFIN|ZDB-GENE-080303-1	70.5	5.1e-27	100003913	si:ch73-380l3.2	GO:0016020	membrane	cellular_component	3
TRINITY_DN12734_c0_g1	ZFIN|ZDB-GENE-080303-1	70.5	5.1e-27	100003913	si:ch73-380l3.2	GO:0016021	integral component of membrane	cellular_component	5
TRINITY_DN12735_c0_g1	TAIR|locus:2199882	54.4	1.8e-42	839017	AT1G24050	GO:0003674	molecular_function	molecular_function	2
TRINITY_DN12735_c0_g1	TAIR|locus:2199882	54.4	1.8e-42	839017	AT1G24050	GO:0008150	biological_process	biological_process	2
TRINITY_DN12738_c0_g1	UNIPROTKB|K4CR63	72	9.7e-140	101267732	K4CR63	GO:0005886	plasma membrane	cellular_component	4
TRINITY_DN12738_c0_g1	UNIPROTKB|K4CR63	72	9.7e-140	101267732	K4CR63	GO:0006810	transport	biological_process	5
TRINITY_DN12738_c0_g1	UNIPROTKB|K4CR63	72	9.7e-140	101267732	K4CR63	GO:0022857	transmembrane transporter activity	molecular_function	4
TRINITY_DN12765_c0_g1	ZFIN|ZDB-GENE-030825-7	77.6	3.5e-25	-	xiap	GO:0004842	ubiquitin-protein transferase activity	molecular_function	6
TRINITY_DN12765_c0_g1	ZFIN|ZDB-GENE-030825-7	77.6	3.5e-25	-	xiap	GO:0005634	nucleus	cellular_component	6
TRINITY_DN12765_c0_g1	ZFIN|ZDB-GENE-030825-7	77.6	3.5e-25	-	xiap	GO:0005737	cytoplasm	cellular_component	5
TRINITY_DN12765_c0_g1	ZFIN|ZDB-GENE-030825-7	77.6	3.5e-25	-	xiap	GO:0009966	regulation of signal transduction	biological_process	7
TRINITY_DN12765_c0_g1	ZFIN|ZDB-GENE-030825-7	77.6	3.5e-25	-	xiap	GO:0043027	cysteine-type endopeptidase inhibitor activity involved in apoptotic process	molecular_function	9
TRINITY_DN12765_c0_g1	ZFIN|ZDB-GENE-030825-7	77.6	3.5e-25	-	xiap	GO:0046872	metal ion binding	molecular_function	6
TRINITY_DN12765_c0_g1	ZFIN|ZDB-GENE-030825-7	77.6	3.5e-25	-	xiap	GO:0090307	mitotic spindle assembly	biological_process	10
TRINITY_DN12765_c0_g1	ZFIN|ZDB-GENE-030825-7	77.6	3.5e-25	-	xiap	GO:1990001	inhibition of cysteine-type endopeptidase activity involved in apoptotic process	biological_process	11
TRINITY_DN12776_c0_g1	ZFIN|ZDB-GENE-081105-111	93.1	7.9e-31	562909	pptc7b	GO:0003824	catalytic activity	molecular_function	3
TRINITY_DN12788_c1_g1	MGI|MGI:106912	100	8e-39	13733	Adgre1	GO:0002250	adaptive immune response	biological_process	5
TRINITY_DN12788_c1_g1	MGI|MGI:106912	100	8e-39	13733	Adgre1	GO:0002376	immune system process	biological_process	3
TRINITY_DN12788_c1_g1	MGI|MGI:106912	100	8e-39	13733	Adgre1	GO:0004888	transmembrane signaling receptor activity	molecular_function	5
TRINITY_DN12788_c1_g1	MGI|MGI:106912	100	8e-39	13733	Adgre1	GO:0004930	G-protein coupled receptor activity	molecular_function	6
TRINITY_DN12788_c1_g1	MGI|MGI:106912	100	8e-39	13733	Adgre1	GO:0005509	calcium ion binding	molecular_function	7
TRINITY_DN12788_c1_g1	MGI|MGI:106912	100	8e-39	13733	Adgre1	GO:0005886	plasma membrane	cellular_component	4
TRINITY_DN12788_c1_g1	MGI|MGI:106912	100	8e-39	13733	Adgre1	GO:0007165	signal transduction	biological_process	4
TRINITY_DN12788_c1_g1	MGI|MGI:106912	100	8e-39	13733	Adgre1	GO:0007166	cell surface receptor signaling pathway	biological_process	5
TRINITY_DN12788_c1_g1	MGI|MGI:106912	100	8e-39	13733	Adgre1	GO:0007186	G-protein coupled receptor signaling pathway	biological_process	5
TRINITY_DN12788_c1_g1	MGI|MGI:106912	100	8e-39	13733	Adgre1	GO:0009897	external side of plasma membrane	cellular_component	5
TRINITY_DN12788_c1_g1	MGI|MGI:106912	100	8e-39	13733	Adgre1	GO:0016020	membrane	cellular_component	3
TRINITY_DN12788_c1_g1	MGI|MGI:106912	100	8e-39	13733	Adgre1	GO:0016021	integral component of membrane	cellular_component	5
TRINITY_DN12788_c1_g1	MGI|MGI:106912	100	8e-39	13733	Adgre1	GO:0071944	cell periphery	cellular_component	4
TRINITY_DN12819_c0_g1	TAIR|locus:2085532	93.5	9e-44	820266	AT3G10950	GO:0003735	structural constituent of ribosome	molecular_function	4
TRINITY_DN12819_c0_g1	TAIR|locus:2085532	93.5	9e-44	820266	AT3G10950	GO:0005737	cytoplasm	cellular_component	5
TRINITY_DN12819_c0_g1	TAIR|locus:2085532	93.5	9e-44	820266	AT3G10950	GO:0005829	cytosol	cellular_component	6
TRINITY_DN12819_c0_g1	TAIR|locus:2085532	93.5	9e-44	820266	AT3G10950	GO:0005840	ribosome	cellular_component	6
TRINITY_DN12819_c0_g1	TAIR|locus:2085532	93.5	9e-44	820266	AT3G10950	GO:0006412	translation	biological_process	8
TRINITY_DN12819_c0_g1	TAIR|locus:2085532	93.5	9e-44	820266	AT3G10950	GO:0022625	cytosolic large ribosomal subunit	cellular_component	8
TRINITY_DN12819_c0_g1	TAIR|locus:2085532	93.5	9e-44	820266	AT3G10950	GO:0042254	ribosome biogenesis	biological_process	6
TRINITY_DN12819_c0_g1	TAIR|locus:2085532	93.5	9e-44	820266	AT3G10950	GO:0046872	metal ion binding	molecular_function	6
TRINITY_DN12840_c0_g1	UNIPROTKB|E2RM47	58.5	3.1e-27	-	SEC14L3	GO:0006810	transport	biological_process	5
TRINITY_DN12840_c0_g1	UNIPROTKB|E2RM47	58.5	3.1e-27	-	SEC14L3	GO:0016021	integral component of membrane	cellular_component	5
TRINITY_DN12840_c0_g1	UNIPROTKB|E2RM47	58.5	3.1e-27	-	SEC14L3	GO:0070062	extracellular exosome	cellular_component	7
TRINITY_DN12840_c0_g2	ZFIN|ZDB-GENE-060526-180	80.6	2.8e-09	558964	sec14l8	GO:0003924	GTPase activity	molecular_function	9
TRINITY_DN12840_c0_g2	ZFIN|ZDB-GENE-060526-180	80.6	2.8e-09	558964	sec14l8	GO:0005515	protein binding	molecular_function	4
TRINITY_DN12840_c0_g2	ZFIN|ZDB-GENE-060526-180	80.6	2.8e-09	558964	sec14l8	GO:0005525	GTP binding	molecular_function	8
TRINITY_DN12840_c0_g2	ZFIN|ZDB-GENE-060526-180	80.6	2.8e-09	558964	sec14l8	GO:0007223	Wnt signaling pathway, calcium modulating pathway	biological_process	9
TRINITY_DN12840_c0_g2	ZFIN|ZDB-GENE-060526-180	80.6	2.8e-09	558964	sec14l8	GO:0019897	extrinsic component of plasma membrane	cellular_component	5
TRINITY_DN12840_c0_g2	ZFIN|ZDB-GENE-060526-180	80.6	2.8e-09	558964	sec14l8	GO:0032794	GTPase activating protein binding	molecular_function	5
TRINITY_DN12840_c0_g2	ZFIN|ZDB-GENE-060526-180	80.6	2.8e-09	558964	sec14l8	GO:1901232	regulation of convergent extension involved in axis elongation	biological_process	7
TRINITY_DN12840_c0_g2	ZFIN|ZDB-GENE-060526-180	80.6	2.8e-09	558964	sec14l8	GO:1904088	positive regulation of epiboly involved in gastrulation with mouth forming second	biological_process	9
TRINITY_DN12845_c0_g1	TAIR|locus:2010419	77.5	2.4e-11	839692	AT1G27990	GO:0003674	molecular_function	molecular_function	2
TRINITY_DN12845_c0_g1	TAIR|locus:2010419	77.5	2.4e-11	839692	AT1G27990	GO:0008150	biological_process	biological_process	2
TRINITY_DN12845_c0_g1	TAIR|locus:2010419	77.5	2.4e-11	839692	AT1G27990	GO:0016021	integral component of membrane	cellular_component	5
TRINITY_DN12883_c0_g1	ZFIN|ZDB-GENE-060125-2	98.6	4.1e-32	321070	rock2b	GO:0000166	nucleotide binding	molecular_function	5
TRINITY_DN12883_c0_g1	ZFIN|ZDB-GENE-060125-2	98.6	4.1e-32	321070	rock2b	GO:0004672	protein kinase activity	molecular_function	7
TRINITY_DN12883_c0_g1	ZFIN|ZDB-GENE-060125-2	98.6	4.1e-32	321070	rock2b	GO:0004674	protein serine/threonine kinase activity	molecular_function	8
TRINITY_DN12883_c0_g1	ZFIN|ZDB-GENE-060125-2	98.6	4.1e-32	321070	rock2b	GO:0005524	ATP binding	molecular_function	5
TRINITY_DN12883_c0_g1	ZFIN|ZDB-GENE-060125-2	98.6	4.1e-32	321070	rock2b	GO:0005737	cytoplasm	cellular_component	5
TRINITY_DN12883_c0_g1	ZFIN|ZDB-GENE-060125-2	98.6	4.1e-32	321070	rock2b	GO:0005856	cytoskeleton	cellular_component	6
TRINITY_DN12883_c0_g1	ZFIN|ZDB-GENE-060125-2	98.6	4.1e-32	321070	rock2b	GO:0006468	protein phosphorylation	biological_process	9
TRINITY_DN12883_c0_g1	ZFIN|ZDB-GENE-060125-2	98.6	4.1e-32	321070	rock2b	GO:0006939	smooth muscle contraction	biological_process	7
TRINITY_DN12883_c0_g1	ZFIN|ZDB-GENE-060125-2	98.6	4.1e-32	321070	rock2b	GO:0007266	Rho protein signal transduction	biological_process	8
TRINITY_DN12883_c0_g1	ZFIN|ZDB-GENE-060125-2	98.6	4.1e-32	321070	rock2b	GO:0010825	positive regulation of centrosome duplication	biological_process	10
TRINITY_DN12883_c0_g1	ZFIN|ZDB-GENE-060125-2	98.6	4.1e-32	321070	rock2b	GO:0016020	membrane	cellular_component	3
TRINITY_DN12883_c0_g1	ZFIN|ZDB-GENE-060125-2	98.6	4.1e-32	321070	rock2b	GO:0016021	integral component of membrane	cellular_component	5
TRINITY_DN12883_c0_g1	ZFIN|ZDB-GENE-060125-2	98.6	4.1e-32	321070	rock2b	GO:0016301	kinase activity	molecular_function	6
TRINITY_DN12883_c0_g1	ZFIN|ZDB-GENE-060125-2	98.6	4.1e-32	321070	rock2b	GO:0016310	phosphorylation	biological_process	7
TRINITY_DN12883_c0_g1	ZFIN|ZDB-GENE-060125-2	98.6	4.1e-32	321070	rock2b	GO:0016740	transferase activity	molecular_function	4
TRINITY_DN12883_c0_g1	ZFIN|ZDB-GENE-060125-2	98.6	4.1e-32	321070	rock2b	GO:0017048	Rho GTPase binding	molecular_function	9
TRINITY_DN12883_c0_g1	ZFIN|ZDB-GENE-060125-2	98.6	4.1e-32	321070	rock2b	GO:0030036	actin cytoskeleton organization	biological_process	7
TRINITY_DN12883_c0_g1	ZFIN|ZDB-GENE-060125-2	98.6	4.1e-32	321070	rock2b	GO:0032956	regulation of actin cytoskeleton organization	biological_process	7
TRINITY_DN12883_c0_g1	ZFIN|ZDB-GENE-060125-2	98.6	4.1e-32	321070	rock2b	GO:0035556	intracellular signal transduction	biological_process	5
TRINITY_DN12883_c0_g1	ZFIN|ZDB-GENE-060125-2	98.6	4.1e-32	321070	rock2b	GO:0046872	metal ion binding	molecular_function	6
TRINITY_DN12883_c0_g1	ZFIN|ZDB-GENE-060125-2	98.6	4.1e-32	321070	rock2b	GO:0060287	epithelial cilium movement involved in determination of left/right asymmetry	biological_process	8
TRINITY_DN12883_c0_g1	ZFIN|ZDB-GENE-060125-2	98.6	4.1e-32	321070	rock2b	GO:0070121	Kupffer's vesicle development	biological_process	5
TRINITY_DN1289_c0_g1	TAIR|locus:2036972	80.8	1.4e-18	838776	PBC1	GO:0000502	proteasome complex	cellular_component	5
TRINITY_DN1289_c0_g1	TAIR|locus:2036972	80.8	1.4e-18	838776	PBC1	GO:0004298	threonine-type endopeptidase activity	molecular_function	8
TRINITY_DN1289_c0_g1	TAIR|locus:2036972	80.8	1.4e-18	838776	PBC1	GO:0005634	nucleus	cellular_component	6
TRINITY_DN1289_c0_g1	TAIR|locus:2036972	80.8	1.4e-18	838776	PBC1	GO:0005737	cytoplasm	cellular_component	5
TRINITY_DN1289_c0_g1	TAIR|locus:2036972	80.8	1.4e-18	838776	PBC1	GO:0005774	vacuolar membrane	cellular_component	7
TRINITY_DN1289_c0_g1	TAIR|locus:2036972	80.8	1.4e-18	838776	PBC1	GO:0005829	cytosol	cellular_component	6
TRINITY_DN1289_c0_g1	TAIR|locus:2036972	80.8	1.4e-18	838776	PBC1	GO:0005839	proteasome core complex	cellular_component	4
TRINITY_DN1289_c0_g1	TAIR|locus:2036972	80.8	1.4e-18	838776	PBC1	GO:0006511	ubiquitin-dependent protein catabolic process	biological_process	10
TRINITY_DN1289_c0_g1	TAIR|locus:2036972	80.8	1.4e-18	838776	PBC1	GO:0008233	peptidase activity	molecular_function	5
TRINITY_DN1289_c0_g1	TAIR|locus:2036972	80.8	1.4e-18	838776	PBC1	GO:0043161	proteasome-mediated ubiquitin-dependent protein catabolic process	biological_process	11
TRINITY_DN1290_c0_g1	TAIR|locus:2199461	56.9	5.3e-20	841900	ACP2	GO:0000035	acyl binding	molecular_function	4
TRINITY_DN1290_c0_g1	TAIR|locus:2199461	56.9	5.3e-20	841900	ACP2	GO:0000036	acyl carrier activity	molecular_function	7
TRINITY_DN1290_c0_g1	TAIR|locus:2199461	56.9	5.3e-20	841900	ACP2	GO:0005829	cytosol	cellular_component	6
TRINITY_DN1290_c0_g1	TAIR|locus:2199461	56.9	5.3e-20	841900	ACP2	GO:0006633	fatty acid biosynthetic process	biological_process	10
TRINITY_DN1290_c0_g1	TAIR|locus:2199461	56.9	5.3e-20	841900	ACP2	GO:0009245	lipid A biosynthetic process	biological_process	9
TRINITY_DN1290_c0_g1	TAIR|locus:2199461	56.9	5.3e-20	841900	ACP2	GO:0009507	chloroplast	cellular_component	7
TRINITY_DN1290_c0_g1	TAIR|locus:2199461	56.9	5.3e-20	841900	ACP2	GO:0031177	phosphopantetheine binding	molecular_function	6
TRINITY_DN12919_c0_g1	TAIR|locus:2198279	69.9	1.6e-20	839877	AT1G29980	GO:0005576	extracellular region	cellular_component	3
TRINITY_DN12919_c0_g1	TAIR|locus:2198279	69.9	1.6e-20	839877	AT1G29980	GO:0005634	nucleus	cellular_component	6
TRINITY_DN12919_c0_g1	TAIR|locus:2198279	69.9	1.6e-20	839877	AT1G29980	GO:0005886	plasma membrane	cellular_component	4
TRINITY_DN12919_c0_g1	TAIR|locus:2198279	69.9	1.6e-20	839877	AT1G29980	GO:0008150	biological_process	biological_process	2
TRINITY_DN12919_c0_g1	TAIR|locus:2198279	69.9	1.6e-20	839877	AT1G29980	GO:0031225	anchored component of membrane	cellular_component	5
TRINITY_DN12919_c0_g2	TAIR|locus:2198279	75.6	4.5e-33	839877	AT1G29980	GO:0005576	extracellular region	cellular_component	3
TRINITY_DN12919_c0_g2	TAIR|locus:2198279	75.6	4.5e-33	839877	AT1G29980	GO:0005634	nucleus	cellular_component	6
TRINITY_DN12919_c0_g2	TAIR|locus:2198279	75.6	4.5e-33	839877	AT1G29980	GO:0005886	plasma membrane	cellular_component	4
TRINITY_DN12919_c0_g2	TAIR|locus:2198279	75.6	4.5e-33	839877	AT1G29980	GO:0008150	biological_process	biological_process	2
TRINITY_DN12919_c0_g2	TAIR|locus:2198279	75.6	4.5e-33	839877	AT1G29980	GO:0031225	anchored component of membrane	cellular_component	5
TRINITY_DN12940_c0_g1	TAIR|locus:2044856	82.9	1.2e-26	818220	FBA6	GO:0004332	fructose-bisphosphate aldolase activity	molecular_function	7
TRINITY_DN12940_c0_g1	TAIR|locus:2044856	82.9	1.2e-26	818220	FBA6	GO:0005507	copper ion binding	molecular_function	8
TRINITY_DN12940_c0_g1	TAIR|locus:2044856	82.9	1.2e-26	818220	FBA6	GO:0005515	protein binding	molecular_function	4
TRINITY_DN12940_c0_g1	TAIR|locus:2044856	82.9	1.2e-26	818220	FBA6	GO:0005634	nucleus	cellular_component	6
TRINITY_DN12940_c0_g1	TAIR|locus:2044856	82.9	1.2e-26	818220	FBA6	GO:0005737	cytoplasm	cellular_component	5
TRINITY_DN12940_c0_g1	TAIR|locus:2044856	82.9	1.2e-26	818220	FBA6	GO:0005739	mitochondrion	cellular_component	6
TRINITY_DN12940_c0_g1	TAIR|locus:2044856	82.9	1.2e-26	818220	FBA6	GO:0005829	cytosol	cellular_component	6
TRINITY_DN12940_c0_g1	TAIR|locus:2044856	82.9	1.2e-26	818220	FBA6	GO:0005886	plasma membrane	cellular_component	4
TRINITY_DN12940_c0_g1	TAIR|locus:2044856	82.9	1.2e-26	818220	FBA6	GO:0006094	gluconeogenesis	biological_process	9
TRINITY_DN12940_c0_g1	TAIR|locus:2044856	82.9	1.2e-26	818220	FBA6	GO:0006096	glycolytic process	biological_process	10
TRINITY_DN12940_c0_g1	TAIR|locus:2044856	82.9	1.2e-26	818220	FBA6	GO:0006098	pentose-phosphate shunt	biological_process	7
TRINITY_DN12940_c0_g1	TAIR|locus:2044856	82.9	1.2e-26	818220	FBA6	GO:0009506	plasmodesma	cellular_component	5
TRINITY_DN12940_c0_g1	TAIR|locus:2044856	82.9	1.2e-26	818220	FBA6	GO:0009651	response to salt stress	biological_process	6
TRINITY_DN12940_c0_g1	TAIR|locus:2044856	82.9	1.2e-26	818220	FBA6	GO:0009735	response to cytokinin	biological_process	6
TRINITY_DN12940_c0_g1	TAIR|locus:2044856	82.9	1.2e-26	818220	FBA6	GO:0016020	membrane	cellular_component	3
TRINITY_DN12940_c0_g1	TAIR|locus:2044856	82.9	1.2e-26	818220	FBA6	GO:0031930	mitochondria-nucleus signaling pathway	biological_process	5
TRINITY_DN12940_c0_g1	TAIR|locus:2044856	82.9	1.2e-26	818220	FBA6	GO:0046686	response to cadmium ion	biological_process	7
TRINITY_DN12944_c0_g1	ZFIN|ZDB-GENE-020419-1	100	1.3e-45	-	u2af1	GO:0000398	mRNA splicing, via spliceosome	biological_process	13
TRINITY_DN12944_c0_g1	ZFIN|ZDB-GENE-020419-1	100	1.3e-45	-	u2af1	GO:0003676	nucleic acid binding	molecular_function	5
TRINITY_DN12944_c0_g1	ZFIN|ZDB-GENE-020419-1	100	1.3e-45	-	u2af1	GO:0003723	RNA binding	molecular_function	6
TRINITY_DN12944_c0_g1	ZFIN|ZDB-GENE-020419-1	100	1.3e-45	-	u2af1	GO:0005681	spliceosomal complex	cellular_component	6
TRINITY_DN12944_c0_g1	ZFIN|ZDB-GENE-020419-1	100	1.3e-45	-	u2af1	GO:0030628	pre-mRNA 3'-splice site binding	molecular_function	8
TRINITY_DN12944_c0_g1	ZFIN|ZDB-GENE-020419-1	100	1.3e-45	-	u2af1	GO:0046872	metal ion binding	molecular_function	6
TRINITY_DN12944_c0_g1	ZFIN|ZDB-GENE-020419-1	100	1.3e-45	-	u2af1	GO:0089701	U2AF	cellular_component	4
TRINITY_DN12956_c0_g2	UNIPROTKB|F6HFX6	100	7.2e-23	-	VIT_04s0079g00760	GO:0005768	endosome	cellular_component	7
TRINITY_DN12956_c0_g2	UNIPROTKB|F6HFX6	100	7.2e-23	-	VIT_04s0079g00760	GO:0030139	endocytic vesicle	cellular_component	7
TRINITY_DN12960_c0_g1	UNIPROTKB|H7BYH4	100	5.4e-51	-	SOD1	GO:0004784	superoxide dismutase activity	molecular_function	4
TRINITY_DN12960_c0_g1	UNIPROTKB|H7BYH4	100	5.4e-51	-	SOD1	GO:0005654	nucleoplasm	cellular_component	6
TRINITY_DN12960_c0_g1	UNIPROTKB|H7BYH4	100	5.4e-51	-	SOD1	GO:0005737	cytoplasm	cellular_component	5
TRINITY_DN12960_c0_g1	UNIPROTKB|H7BYH4	100	5.4e-51	-	SOD1	GO:0019430	removal of superoxide radicals	biological_process	7
TRINITY_DN12960_c0_g1	UNIPROTKB|H7BYH4	100	5.4e-51	-	SOD1	GO:0046872	metal ion binding	molecular_function	6
TRINITY_DN12960_c0_g1	UNIPROTKB|H7BYH4	100	5.4e-51	-	SOD1	GO:0055114	oxidation-reduction process	biological_process	4
TRINITY_DN12962_c0_g1	TAIR|locus:2155831	68.1	2.8e-19	835919	TIL	GO:0005215	transporter activity	molecular_function	3
TRINITY_DN12962_c0_g1	TAIR|locus:2155831	68.1	2.8e-19	835919	TIL	GO:0005576	extracellular region	cellular_component	3
TRINITY_DN12962_c0_g1	TAIR|locus:2155831	68.1	2.8e-19	835919	TIL	GO:0005737	cytoplasm	cellular_component	5
TRINITY_DN12962_c0_g1	TAIR|locus:2155831	68.1	2.8e-19	835919	TIL	GO:0005739	mitochondrion	cellular_component	6
TRINITY_DN12962_c0_g1	TAIR|locus:2155831	68.1	2.8e-19	835919	TIL	GO:0005773	vacuole	cellular_component	6
TRINITY_DN12962_c0_g1	TAIR|locus:2155831	68.1	2.8e-19	835919	TIL	GO:0005774	vacuolar membrane	cellular_component	7
TRINITY_DN12962_c0_g1	TAIR|locus:2155831	68.1	2.8e-19	835919	TIL	GO:0005783	endoplasmic reticulum	cellular_component	6
TRINITY_DN12962_c0_g1	TAIR|locus:2155831	68.1	2.8e-19	835919	TIL	GO:0005794	Golgi apparatus	cellular_component	6
TRINITY_DN12962_c0_g1	TAIR|locus:2155831	68.1	2.8e-19	835919	TIL	GO:0005829	cytosol	cellular_component	6
TRINITY_DN12962_c0_g1	TAIR|locus:2155831	68.1	2.8e-19	835919	TIL	GO:0005886	plasma membrane	cellular_component	4
TRINITY_DN12962_c0_g1	TAIR|locus:2155831	68.1	2.8e-19	835919	TIL	GO:0006629	lipid metabolic process	biological_process	5
TRINITY_DN12962_c0_g1	TAIR|locus:2155831	68.1	2.8e-19	835919	TIL	GO:0006810	transport	biological_process	5
TRINITY_DN12962_c0_g1	TAIR|locus:2155831	68.1	2.8e-19	835919	TIL	GO:0006883	cellular sodium ion homeostasis	biological_process	11
TRINITY_DN12962_c0_g1	TAIR|locus:2155831	68.1	2.8e-19	835919	TIL	GO:0009408	response to heat	biological_process	5
TRINITY_DN12962_c0_g1	TAIR|locus:2155831	68.1	2.8e-19	835919	TIL	GO:0009409	response to cold	biological_process	5
TRINITY_DN12962_c0_g1	TAIR|locus:2155831	68.1	2.8e-19	835919	TIL	GO:0009414	response to water deprivation	biological_process	5
TRINITY_DN12962_c0_g1	TAIR|locus:2155831	68.1	2.8e-19	835919	TIL	GO:0009416	response to light stimulus	biological_process	6
TRINITY_DN12962_c0_g1	TAIR|locus:2155831	68.1	2.8e-19	835919	TIL	GO:0009506	plasmodesma	cellular_component	5
TRINITY_DN12962_c0_g1	TAIR|locus:2155831	68.1	2.8e-19	835919	TIL	GO:0009644	response to high light intensity	biological_process	8
TRINITY_DN12962_c0_g1	TAIR|locus:2155831	68.1	2.8e-19	835919	TIL	GO:0009735	response to cytokinin	biological_process	6
TRINITY_DN12962_c0_g1	TAIR|locus:2155831	68.1	2.8e-19	835919	TIL	GO:0009898	cytoplasmic side of plasma membrane	cellular_component	5
TRINITY_DN12962_c0_g1	TAIR|locus:2155831	68.1	2.8e-19	835919	TIL	GO:0009941	chloroplast envelope	cellular_component	7
TRINITY_DN12962_c0_g1	TAIR|locus:2155831	68.1	2.8e-19	835919	TIL	GO:0010286	heat acclimation	biological_process	6
TRINITY_DN12962_c0_g1	TAIR|locus:2155831	68.1	2.8e-19	835919	TIL	GO:0010431	seed maturation	biological_process	5
TRINITY_DN12962_c0_g1	TAIR|locus:2155831	68.1	2.8e-19	835919	TIL	GO:0030644	cellular chloride ion homeostasis	biological_process	11
TRINITY_DN12962_c0_g1	TAIR|locus:2155831	68.1	2.8e-19	835919	TIL	GO:0031969	chloroplast membrane	cellular_component	6
TRINITY_DN12962_c0_g1	TAIR|locus:2155831	68.1	2.8e-19	835919	TIL	GO:0042538	hyperosmotic salinity response	biological_process	7
TRINITY_DN12962_c0_g1	TAIR|locus:2155831	68.1	2.8e-19	835919	TIL	GO:0045735	nutrient reservoir activity	molecular_function	3
TRINITY_DN12962_c0_g1	TAIR|locus:2155831	68.1	2.8e-19	835919	TIL	GO:0050826	response to freezing	biological_process	6
TRINITY_DN12962_c0_g1	TAIR|locus:2155831	68.1	2.8e-19	835919	TIL	GO:1901002	positive regulation of response to salt stress	biological_process	7
TRINITY_DN12962_c0_g1	TAIR|locus:2155831	68.1	2.8e-19	835919	TIL	GO:1901562	response to paraquat	biological_process	6
TRINITY_DN12962_c0_g1	TAIR|locus:2155831	68.1	2.8e-19	835919	TIL	GO:1902884	positive regulation of response to oxidative stress	biological_process	7
TRINITY_DN12965_c0_g1	CGD|CAL0000198483	43.3	5.9e-07	3648026	GRE2	GO:0005575	cellular_component	cellular_component	2
TRINITY_DN12965_c0_g1	CGD|CAL0000198483	43.3	5.9e-07	3648026	GRE2	GO:0006970	response to osmotic stress	biological_process	5
TRINITY_DN12965_c0_g1	CGD|CAL0000198483	43.3	5.9e-07	3648026	GRE2	GO:0016491	oxidoreductase activity	molecular_function	4
TRINITY_DN12965_c0_g1	CGD|CAL0000198483	43.3	5.9e-07	3648026	GRE2	GO:0034599	cellular response to oxidative stress	biological_process	6
TRINITY_DN12965_c0_g1	CGD|CAL0000198483	43.3	5.9e-07	3648026	GRE2	GO:0044237	cellular metabolic process	biological_process	4
TRINITY_DN12965_c0_g1	CGD|CAL0000198483	43.3	5.9e-07	3648026	GRE2	GO:0050662	coenzyme binding	molecular_function	5
TRINITY_DN12976_c0_g1	TAIR|locus:2059708	67.8	8.8e-16	814721	t5ptase9	GO:0004439	phosphatidylinositol-4,5-bisphosphate 5-phosphatase activity	molecular_function	10
TRINITY_DN12976_c0_g1	TAIR|locus:2059708	67.8	8.8e-16	814721	t5ptase9	GO:0005634	nucleus	cellular_component	6
TRINITY_DN12976_c0_g1	TAIR|locus:2059708	67.8	8.8e-16	814721	t5ptase9	GO:0016787	hydrolase activity	molecular_function	4
TRINITY_DN12976_c0_g1	TAIR|locus:2059708	67.8	8.8e-16	814721	t5ptase9	GO:0034485	phosphatidylinositol-3,4,5-trisphosphate 5-phosphatase activity	molecular_function	10
TRINITY_DN12976_c0_g1	TAIR|locus:2059708	67.8	8.8e-16	814721	t5ptase9	GO:0034595	phosphatidylinositol phosphate 5-phosphatase activity	molecular_function	9
TRINITY_DN12976_c0_g1	TAIR|locus:2059708	67.8	8.8e-16	814721	t5ptase9	GO:0046856	phosphatidylinositol dephosphorylation	biological_process	10
TRINITY_DN12976_c0_g1	TAIR|locus:2059708	67.8	8.8e-16	814721	t5ptase9	GO:0071472	cellular response to salt stress	biological_process	7
TRINITY_DN12976_c0_g1	TAIR|locus:2059708	67.8	8.8e-16	814721	t5ptase9	GO:2000369	regulation of clathrin-dependent endocytosis	biological_process	9
TRINITY_DN12976_c0_g1	TAIR|locus:2059708	67.8	8.8e-16	814721	t5ptase9	GO:2000377	regulation of reactive oxygen species metabolic process	biological_process	7
TRINITY_DN12979_c0_g1	FB|FBgn0038421	65.2	4.9e-06	8674030	CG17931	GO:0003674	molecular_function	molecular_function	2
TRINITY_DN12979_c0_g1	FB|FBgn0038421	65.2	4.9e-06	8674030	CG17931	GO:0005829	cytosol	cellular_component	6
TRINITY_DN12979_c0_g1	FB|FBgn0038421	65.2	4.9e-06	8674030	CG17931	GO:0008150	biological_process	biological_process	2
TRINITY_DN12997_c0_g1	TAIR|locus:2099172	65.3	1.2e-96	825469	OTU5	GO:0005737	cytoplasm	cellular_component	5
TRINITY_DN12997_c0_g1	TAIR|locus:2099172	65.3	1.2e-96	825469	OTU5	GO:0005829	cytosol	cellular_component	6
TRINITY_DN12997_c0_g1	TAIR|locus:2099172	65.3	1.2e-96	825469	OTU5	GO:0008234	cysteine-type peptidase activity	molecular_function	7
TRINITY_DN13003_c0_g1	TAIR|locus:4515102688	50	2.3e-45	6240792	AT1G56423	GO:0003674	molecular_function	molecular_function	2
TRINITY_DN13003_c0_g1	TAIR|locus:4515102688	50	2.3e-45	6240792	AT1G56423	GO:0005783	endoplasmic reticulum	cellular_component	6
TRINITY_DN13003_c0_g1	TAIR|locus:4515102688	50	2.3e-45	6240792	AT1G56423	GO:0008150	biological_process	biological_process	2
TRINITY_DN13003_c0_g1	TAIR|locus:4515102688	50	2.3e-45	6240792	AT1G56423	GO:0009507	chloroplast	cellular_component	7
TRINITY_DN13007_c1_g1	TAIR|locus:2182855	82.7	2e-32	830609	ERL2	GO:0004672	protein kinase activity	molecular_function	7
TRINITY_DN13007_c1_g1	TAIR|locus:2182855	82.7	2e-32	830609	ERL2	GO:0004674	protein serine/threonine kinase activity	molecular_function	8
TRINITY_DN13007_c1_g1	TAIR|locus:2182855	82.7	2e-32	830609	ERL2	GO:0005524	ATP binding	molecular_function	5
TRINITY_DN13007_c1_g1	TAIR|locus:2182855	82.7	2e-32	830609	ERL2	GO:0005886	plasma membrane	cellular_component	4
TRINITY_DN13007_c1_g1	TAIR|locus:2182855	82.7	2e-32	830609	ERL2	GO:0006468	protein phosphorylation	biological_process	9
TRINITY_DN13007_c1_g1	TAIR|locus:2182855	82.7	2e-32	830609	ERL2	GO:0009553	embryo sac development	biological_process	6
TRINITY_DN13007_c1_g1	TAIR|locus:2182855	82.7	2e-32	830609	ERL2	GO:0010103	stomatal complex morphogenesis	biological_process	6
TRINITY_DN13007_c1_g1	TAIR|locus:2182855	82.7	2e-32	830609	ERL2	GO:0016021	integral component of membrane	cellular_component	5
TRINITY_DN13007_c1_g1	TAIR|locus:2182855	82.7	2e-32	830609	ERL2	GO:0016301	kinase activity	molecular_function	6
TRINITY_DN13007_c1_g1	TAIR|locus:2182855	82.7	2e-32	830609	ERL2	GO:0048481	plant ovule development	biological_process	5
TRINITY_DN13007_c1_g3	TAIR|locus:2167948	83.3	1e-31	836344	ERL1	GO:0004672	protein kinase activity	molecular_function	7
TRINITY_DN13007_c1_g3	TAIR|locus:2167948	83.3	1e-31	836344	ERL1	GO:0004674	protein serine/threonine kinase activity	molecular_function	8
TRINITY_DN13007_c1_g3	TAIR|locus:2167948	83.3	1e-31	836344	ERL1	GO:0005524	ATP binding	molecular_function	5
TRINITY_DN13007_c1_g3	TAIR|locus:2167948	83.3	1e-31	836344	ERL1	GO:0005576	extracellular region	cellular_component	3
TRINITY_DN13007_c1_g3	TAIR|locus:2167948	83.3	1e-31	836344	ERL1	GO:0005886	plasma membrane	cellular_component	4
TRINITY_DN13007_c1_g3	TAIR|locus:2167948	83.3	1e-31	836344	ERL1	GO:0006468	protein phosphorylation	biological_process	9
TRINITY_DN13007_c1_g3	TAIR|locus:2167948	83.3	1e-31	836344	ERL1	GO:0009553	embryo sac development	biological_process	6
TRINITY_DN13007_c1_g3	TAIR|locus:2167948	83.3	1e-31	836344	ERL1	GO:0010103	stomatal complex morphogenesis	biological_process	6
TRINITY_DN13007_c1_g3	TAIR|locus:2167948	83.3	1e-31	836344	ERL1	GO:0016020	membrane	cellular_component	3
TRINITY_DN13007_c1_g3	TAIR|locus:2167948	83.3	1e-31	836344	ERL1	GO:0016021	integral component of membrane	cellular_component	5
TRINITY_DN13007_c1_g3	TAIR|locus:2167948	83.3	1e-31	836344	ERL1	GO:0016301	kinase activity	molecular_function	6
TRINITY_DN13007_c1_g3	TAIR|locus:2167948	83.3	1e-31	836344	ERL1	GO:0048481	plant ovule development	biological_process	5
TRINITY_DN13017_c0_g1	TAIR|locus:2132492	73.8	4.2e-31	826368	ORP1C	GO:0005634	nucleus	cellular_component	6
TRINITY_DN13017_c0_g1	TAIR|locus:2132492	73.8	4.2e-31	826368	ORP1C	GO:0006869	lipid transport	biological_process	7
TRINITY_DN13017_c0_g1	TAIR|locus:2132492	73.8	4.2e-31	826368	ORP1C	GO:0007165	signal transduction	biological_process	4
TRINITY_DN13017_c0_g1	TAIR|locus:2132492	73.8	4.2e-31	826368	ORP1C	GO:0008142	oxysterol binding	molecular_function	7
TRINITY_DN13017_c0_g1	TAIR|locus:2132492	73.8	4.2e-31	826368	ORP1C	GO:0008202	steroid metabolic process	biological_process	6
TRINITY_DN13017_c0_g1	TAIR|locus:2132492	73.8	4.2e-31	826368	ORP1C	GO:0008289	lipid binding	molecular_function	4
TRINITY_DN13017_c0_g1	TAIR|locus:2132492	73.8	4.2e-31	826368	ORP1C	GO:0035091	phosphatidylinositol binding	molecular_function	6
TRINITY_DN13029_c0_g1	TAIR|locus:2034990	67.6	3.8e-17	838464	SEC31A	GO:0000166	nucleotide binding	molecular_function	5
TRINITY_DN13029_c0_g1	TAIR|locus:2034990	67.6	3.8e-17	838464	SEC31A	GO:0005737	cytoplasm	cellular_component	5
TRINITY_DN13029_c0_g1	TAIR|locus:2034990	67.6	3.8e-17	838464	SEC31A	GO:0070971	endoplasmic reticulum exit site	cellular_component	7
TRINITY_DN13048_c0_g2	TAIR|locus:2123076	76.5	1.1e-26	826746	EIF3A	GO:0001732	formation of cytoplasmic translation initiation complex	biological_process	9
TRINITY_DN13048_c0_g2	TAIR|locus:2123076	76.5	1.1e-26	826746	EIF3A	GO:0002188	translation reinitiation	biological_process	7
TRINITY_DN13048_c0_g2	TAIR|locus:2123076	76.5	1.1e-26	826746	EIF3A	GO:0003729	mRNA binding	molecular_function	7
TRINITY_DN13048_c0_g2	TAIR|locus:2123076	76.5	1.1e-26	826746	EIF3A	GO:0003743	translation initiation factor activity	molecular_function	8
TRINITY_DN13048_c0_g2	TAIR|locus:2123076	76.5	1.1e-26	826746	EIF3A	GO:0005515	protein binding	molecular_function	4
TRINITY_DN13048_c0_g2	TAIR|locus:2123076	76.5	1.1e-26	826746	EIF3A	GO:0005737	cytoplasm	cellular_component	5
TRINITY_DN13048_c0_g2	TAIR|locus:2123076	76.5	1.1e-26	826746	EIF3A	GO:0005829	cytosol	cellular_component	6
TRINITY_DN13048_c0_g2	TAIR|locus:2123076	76.5	1.1e-26	826746	EIF3A	GO:0005852	eukaryotic translation initiation factor 3 complex	cellular_component	4
TRINITY_DN13048_c0_g2	TAIR|locus:2123076	76.5	1.1e-26	826746	EIF3A	GO:0005886	plasma membrane	cellular_component	4
TRINITY_DN13048_c0_g2	TAIR|locus:2123076	76.5	1.1e-26	826746	EIF3A	GO:0006413	translational initiation	biological_process	5
TRINITY_DN13048_c0_g2	TAIR|locus:2123076	76.5	1.1e-26	826746	EIF3A	GO:0043614	multi-eIF complex	cellular_component	6
TRINITY_DN13048_c0_g2	TAIR|locus:2123076	76.5	1.1e-26	826746	EIF3A	GO:0071540	eukaryotic translation initiation factor 3 complex, eIF3e	cellular_component	5
TRINITY_DN13048_c0_g2	TAIR|locus:2123076	76.5	1.1e-26	826746	EIF3A	GO:0071541	eukaryotic translation initiation factor 3 complex, eIF3m	cellular_component	5
TRINITY_DN13098_c0_g1	TAIR|locus:2144118	80.6	9.3e-26	830548	UBP12	GO:0004843	thiol-dependent ubiquitin-specific protease activity	molecular_function	10
TRINITY_DN13098_c0_g1	TAIR|locus:2144118	80.6	9.3e-26	830548	UBP12	GO:0005515	protein binding	molecular_function	4
TRINITY_DN13098_c0_g1	TAIR|locus:2144118	80.6	9.3e-26	830548	UBP12	GO:0005634	nucleus	cellular_component	6
TRINITY_DN13098_c0_g1	TAIR|locus:2144118	80.6	9.3e-26	830548	UBP12	GO:0005737	cytoplasm	cellular_component	5
TRINITY_DN13098_c0_g1	TAIR|locus:2144118	80.6	9.3e-26	830548	UBP12	GO:0005829	cytosol	cellular_component	6
TRINITY_DN13098_c0_g1	TAIR|locus:2144118	80.6	9.3e-26	830548	UBP12	GO:0006511	ubiquitin-dependent protein catabolic process	biological_process	10
TRINITY_DN13098_c0_g1	TAIR|locus:2144118	80.6	9.3e-26	830548	UBP12	GO:0009867	jasmonic acid mediated signaling pathway	biological_process	6
TRINITY_DN13098_c0_g1	TAIR|locus:2144118	80.6	9.3e-26	830548	UBP12	GO:0016579	protein deubiquitination	biological_process	9
TRINITY_DN13098_c0_g1	TAIR|locus:2144118	80.6	9.3e-26	830548	UBP12	GO:0036459	thiol-dependent ubiquitinyl hydrolase activity	molecular_function	9
TRINITY_DN13109_c0_g1	TAIR|locus:2037375	80.6	2.2e-28	838690	emb1507	GO:0003723	RNA binding	molecular_function	6
TRINITY_DN13109_c0_g1	TAIR|locus:2037375	80.6	2.2e-28	838690	emb1507	GO:0004386	helicase activity	molecular_function	9
TRINITY_DN13109_c0_g1	TAIR|locus:2037375	80.6	2.2e-28	838690	emb1507	GO:0005515	protein binding	molecular_function	4
TRINITY_DN13109_c0_g1	TAIR|locus:2037375	80.6	2.2e-28	838690	emb1507	GO:0005524	ATP binding	molecular_function	5
TRINITY_DN13109_c0_g1	TAIR|locus:2037375	80.6	2.2e-28	838690	emb1507	GO:0005634	nucleus	cellular_component	6
TRINITY_DN13109_c0_g1	TAIR|locus:2037375	80.6	2.2e-28	838690	emb1507	GO:0005681	spliceosomal complex	cellular_component	6
TRINITY_DN13109_c0_g1	TAIR|locus:2037375	80.6	2.2e-28	838690	emb1507	GO:0005730	nucleolus	cellular_component	6
TRINITY_DN13109_c0_g1	TAIR|locus:2037375	80.6	2.2e-28	838690	emb1507	GO:0005829	cytosol	cellular_component	6
TRINITY_DN13109_c0_g1	TAIR|locus:2037375	80.6	2.2e-28	838690	emb1507	GO:0006397	mRNA processing	biological_process	10
TRINITY_DN13109_c0_g1	TAIR|locus:2037375	80.6	2.2e-28	838690	emb1507	GO:0008026	ATP-dependent helicase activity	molecular_function	10
TRINITY_DN13109_c0_g1	TAIR|locus:2037375	80.6	2.2e-28	838690	emb1507	GO:0008380	RNA splicing	biological_process	10
TRINITY_DN13109_c0_g1	TAIR|locus:2037375	80.6	2.2e-28	838690	emb1507	GO:0009793	embryo development ending in seed dormancy	biological_process	5
TRINITY_DN13109_c0_g1	TAIR|locus:2037375	80.6	2.2e-28	838690	emb1507	GO:0010228	vegetative to reproductive phase transition of meristem	biological_process	5
TRINITY_DN13109_c0_g1	TAIR|locus:2037375	80.6	2.2e-28	838690	emb1507	GO:0016020	membrane	cellular_component	3
TRINITY_DN13116_c0_g1	UNIPROTKB|B9HIW2	80.8	5.2e-69	7483916	POPTR_0008s11270g	GO:0004596	peptide alpha-N-acetyltransferase activity	molecular_function	10
TRINITY_DN13116_c0_g1	UNIPROTKB|B9HIW2	80.8	5.2e-69	7483916	POPTR_0008s11270g	GO:0006474	N-terminal protein amino acid acetylation	biological_process	11
TRINITY_DN13116_c0_g1	UNIPROTKB|B9HIW2	80.8	5.2e-69	7483916	POPTR_0008s11270g	GO:0031248	protein acetyltransferase complex	cellular_component	5
TRINITY_DN13118_c0_g1	UNIPROTKB|Q6ZFV7	98.7	4.8e-34	4346228	Os08g0546700	GO:0004252	serine-type endopeptidase activity	molecular_function	8
TRINITY_DN13118_c0_g1	UNIPROTKB|Q6ZFV7	98.7	4.8e-34	4346228	Os08g0546700	GO:0016485	protein processing	biological_process	8
TRINITY_DN13121_c0_g1	UNIPROTKB|I1JQN7	100	2.4e-33	100786124	GLYMA_03G216000	GO:0030599	pectinesterase activity	molecular_function	7
TRINITY_DN13121_c0_g1	UNIPROTKB|I1JQN7	100	2.4e-33	100786124	GLYMA_03G216000	GO:0046910	pectinesterase inhibitor activity	molecular_function	6
TRINITY_DN13121_c0_g1	UNIPROTKB|I1JQN7	100	2.4e-33	100786124	GLYMA_03G216000	GO:0071944	cell periphery	cellular_component	4
TRINITY_DN13135_c0_g1	UNIPROTKB|F1P7P3	88.2	4e-31	-	CAPZA1	GO:0003779	actin binding	molecular_function	6
TRINITY_DN13135_c0_g1	UNIPROTKB|F1P7P3	88.2	4e-31	-	CAPZA1	GO:0008290	F-actin capping protein complex	cellular_component	4
TRINITY_DN13135_c0_g1	UNIPROTKB|F1P7P3	88.2	4e-31	-	CAPZA1	GO:0051016	barbed-end actin filament capping	biological_process	11
TRINITY_DN13135_c0_g2	ZFIN|ZDB-GENE-031002-24	97	3.5e-33	-	capza1b	GO:0003779	actin binding	molecular_function	6
TRINITY_DN13135_c0_g2	ZFIN|ZDB-GENE-031002-24	97	3.5e-33	-	capza1b	GO:0008290	F-actin capping protein complex	cellular_component	4
TRINITY_DN13135_c0_g2	ZFIN|ZDB-GENE-031002-24	97	3.5e-33	-	capza1b	GO:0051016	barbed-end actin filament capping	biological_process	11
TRINITY_DN13135_c0_g2	ZFIN|ZDB-GENE-031002-24	97	3.5e-33	-	capza1b	GO:0051693	actin filament capping	biological_process	10
TRINITY_DN13141_c0_g1	UNIPROTKB|Q9DDV9	54.7	4.3e-51	-	Q9DDV9	GO:0001848	complement binding	molecular_function	5
TRINITY_DN13141_c0_g1	UNIPROTKB|Q9DDV9	54.7	4.3e-51	-	Q9DDV9	GO:0001905	activation of membrane attack complex	biological_process	6
TRINITY_DN13141_c0_g1	UNIPROTKB|Q9DDV9	54.7	4.3e-51	-	Q9DDV9	GO:0003823	antigen binding	molecular_function	4
TRINITY_DN13141_c0_g1	UNIPROTKB|Q9DDV9	54.7	4.3e-51	-	Q9DDV9	GO:0042742	defense response to bacterium	biological_process	8
TRINITY_DN13147_c0_g1	UNIPROTKB|H9GIE5	78.9	9e-29	100563179	SLC25A37	GO:0003735	structural constituent of ribosome	molecular_function	4
TRINITY_DN13147_c0_g1	UNIPROTKB|H9GIE5	78.9	9e-29	100563179	SLC25A37	GO:0006412	translation	biological_process	8
TRINITY_DN13147_c0_g2	ZFIN|ZDB-GENE-031118-202	78.9	1.5e-21	387000	slc25a37	GO:0005381	iron ion transmembrane transporter activity	molecular_function	10
TRINITY_DN13147_c0_g2	ZFIN|ZDB-GENE-031118-202	78.9	1.5e-21	387000	slc25a37	GO:0005739	mitochondrion	cellular_component	6
TRINITY_DN13147_c0_g2	ZFIN|ZDB-GENE-031118-202	78.9	1.5e-21	387000	slc25a37	GO:0005743	mitochondrial inner membrane	cellular_component	6
TRINITY_DN13147_c0_g2	ZFIN|ZDB-GENE-031118-202	78.9	1.5e-21	387000	slc25a37	GO:0006811	ion transport	biological_process	6
TRINITY_DN13147_c0_g2	ZFIN|ZDB-GENE-031118-202	78.9	1.5e-21	387000	slc25a37	GO:0006839	mitochondrial transport	biological_process	6
TRINITY_DN13147_c0_g2	ZFIN|ZDB-GENE-031118-202	78.9	1.5e-21	387000	slc25a37	GO:0016020	membrane	cellular_component	3
TRINITY_DN13147_c0_g2	ZFIN|ZDB-GENE-031118-202	78.9	1.5e-21	387000	slc25a37	GO:0016021	integral component of membrane	cellular_component	5
TRINITY_DN13147_c0_g2	ZFIN|ZDB-GENE-031118-202	78.9	1.5e-21	387000	slc25a37	GO:0035162	embryonic hemopoiesis	biological_process	8
TRINITY_DN13147_c0_g2	ZFIN|ZDB-GENE-031118-202	78.9	1.5e-21	387000	slc25a37	GO:0043249	erythrocyte maturation	biological_process	6
TRINITY_DN13147_c0_g2	ZFIN|ZDB-GENE-031118-202	78.9	1.5e-21	387000	slc25a37	GO:0048250	iron import into the mitochondrion	biological_process	12
TRINITY_DN13147_c0_g2	ZFIN|ZDB-GENE-031118-202	78.9	1.5e-21	387000	slc25a37	GO:0048821	erythrocyte development	biological_process	7
TRINITY_DN13147_c0_g2	ZFIN|ZDB-GENE-031118-202	78.9	1.5e-21	387000	slc25a37	GO:0055072	iron ion homeostasis	biological_process	11
TRINITY_DN13147_c0_g2	ZFIN|ZDB-GENE-031118-202	78.9	1.5e-21	387000	slc25a37	GO:0055085	transmembrane transport	biological_process	6
TRINITY_DN13147_c0_g3	ZFIN|ZDB-GENE-031118-202	97.6	6.3e-40	387000	slc25a37	GO:0005381	iron ion transmembrane transporter activity	molecular_function	10
TRINITY_DN13147_c0_g3	ZFIN|ZDB-GENE-031118-202	97.6	6.3e-40	387000	slc25a37	GO:0005739	mitochondrion	cellular_component	6
TRINITY_DN13147_c0_g3	ZFIN|ZDB-GENE-031118-202	97.6	6.3e-40	387000	slc25a37	GO:0005743	mitochondrial inner membrane	cellular_component	6
TRINITY_DN13147_c0_g3	ZFIN|ZDB-GENE-031118-202	97.6	6.3e-40	387000	slc25a37	GO:0006811	ion transport	biological_process	6
TRINITY_DN13147_c0_g3	ZFIN|ZDB-GENE-031118-202	97.6	6.3e-40	387000	slc25a37	GO:0006839	mitochondrial transport	biological_process	6
TRINITY_DN13147_c0_g3	ZFIN|ZDB-GENE-031118-202	97.6	6.3e-40	387000	slc25a37	GO:0016020	membrane	cellular_component	3
[truncated: 116,286 more rows]
