# Supplementary material for: Drought Stress Stimulates the Terpenoid Backbone and Triterpenoid Biosynthesis Pathway to Promote the Synthesis of Saikosaponin in Bupleurum chinense DC. Roots
Source: Molecules. 2022 Aug 25;27(17):5470. doi: 10.3390/molecules27175470 (PMC9457724; doi:10.3390/molecules27175470)
Supplement: Supplementary file 1 [file molecules-27-05470-s001.zip › Supplementary Material. Table S4. Pfam_annotation.xlsx]

## Sheet: Sheet1
Query	Pfam_hit	Pfam_description	Pfam_identity	Pfam_evalue
TRINITY_DN10009_c0_g1	D7TJ45_VITVI/17-113	D7TJ45.1 PF00428.17;Ribosomal_60s;	83.7	1.8e-14
TRINITY_DN1000_c0_g1	K3XH04_SETIT/275-495	K3XH04.1 PF00152.18;tRNA-synt_2;	94.1	4.7e-29
TRINITY_DN10015_c0_g1	A0A0K9PCJ6_ZOSMR/477-808	A0A0K9PCJ6.1 PF01103.21;Bac_surface_Ag;	83.9	1.2e-40
TRINITY_DN10037_c0_g1	A0A0D9ZGT0_9ORYZ/574-830	A0A0D9ZGT0.1 PF02171.15;Piwi;	100	2.7e-41
TRINITY_DN10053_c0_g1	F7C0X4_MONDO/620-1079	F7C0X4.1 PF02233.14;PNTB;	96.6	2.6e-08
TRINITY_DN10055_c0_g1	A0A0M3IFW9_ASCLU/3-86	A0A0M3IFW9.1 PF01157.16;Ribosomal_L21e;	88.2	8e-30
TRINITY_DN1007_c0_g1	A0A067GVM9_CITSI/40-358	A0A067GVM9.1 PF00657.20;Lipase_GDSL;	84.6	5.6e-166
TRINITY_DN10111_c0_g1	E7F569_DANRE/7-202	E7F569.1 PF01965.22;DJ-1_PfpI;	91.4	7.9e-50
TRINITY_DN10134_c0_g1	U5FVR8_POPTR/3-50	U5FVR8.1 PF05839.9;Apc13p;	63.8	2.8e-08
TRINITY_DN10140_c0_g1	D5WW50_KYRT2/292-406	D5WW50.1 PF00171.20;Aldedh;	60.9	1.1e-14
TRINITY_DN10146_c0_g1	Q58G56_ARATH/3-66	Q58G56.1 PF09446.8;VMA21;	78.1	8.8e-20
TRINITY_DN10158_c0_g1	A0A0E0PGD6_ORYRU/749-998	A0A0E0PGD6.1 PF13507.4;GATase_5;	96.3	2e-39
TRINITY_DN10165_c0_g1	A0A0J8FYC9_BETVU/10-74	A0A0J8FYC9.1 PF01423.20;LSM;	100	6.1e-18
TRINITY_DN10165_c0_g2	A0A0P7XD74_9TELE/8-73	A0A0P7XD74.1 PF01423.20;LSM;	96.7	2e-28
TRINITY_DN10169_c0_g1	G7JJC7_MEDTR/322-483	G7JJC7.2 PF00227.24;Proteasome;	89.4	1.1e-14
TRINITY_DN10174_c0_g1	M8ARZ4_TRIUA/258-541	M8ARZ4.1 PF00069.23;Pkinase;	94.3	4.2e-31
TRINITY_DN10180_c0_g1	V7BWG5_PHAVU/14-236	V7BWG5.1 PF00244.18;14-3-3;	92.5	9.5e-27
TRINITY_DN10184_c0_g1	G2HGS6_PANTR/257-780	G2HGS6.1 PF00183.16;HSP90;	100	3.5e-14
TRINITY_DN10189_c0_g2	A0A0D9WKI2_9ORYZ/1005-1319	A0A0D9WKI2.1 PF03178.13;CPSF_A;	98.6	1.1e-33
TRINITY_DN1018_c0_g1	G1P4K0_MYOLU/1-59	G1P4K0.1 PF01194.15;RNA_pol_N;	98.2	1.2e-26
TRINITY_DN10196_c0_g1	I1MJP3_SOYBN/4-153	I1MJP3.1 PF00407.17;Bet_v_1;	100	1.1e-33
TRINITY_DN10212_c0_g2	V7CGY0_PHAVU/75-292	V7CGY0.1 PF07859.11;Abhydrolase_3;	56.2	4.7e-13
TRINITY_DN1021_c0_g1	G1SEL8_RABIT/3-50	G1SEL8.1 PF04627.11;ATP-synt_Eps;	93.8	6.2e-17
TRINITY_DN10236_c0_g1	I1J6L0_SOYBN/254-334	I1J6L0.1 PF08501.9;Shikimate_dh_N;	100	5e-32
TRINITY_DN10239_c0_g1	Q6P6E0_DANRE/10-102	Q6P6E0.1 PF04718.13;ATP-synt_G;	100	7.3e-19
TRINITY_DN10261_c0_g1	C6T1W4_SOYBN/8-69	C6T1W4.1 PF02320.14;UCR_hinge;	98.4	4.3e-32
TRINITY_DN10275_c0_g1	A0A0D3F032_9ORYZ/34-232	A0A0D3F032.1 PF01027.18;Bax1-I;	100	1.2e-29
TRINITY_DN10281_c0_g1	M7Z1F0_TRIUA/1-207	M7Z1F0.1 PF00069.23;Pkinase;	94.6	9.3e-23
TRINITY_DN10300_c0_g1	A0A0E0AQM7_9ORYZ/38-107	A0A0E0AQM7.1 PF00076.20;RRM_1;	98	1.1e-20
TRINITY_DN10356_c0_g1	A0A0G2KYH9_DANRE/32-92	A0A0G2KYH9.1 PF00048.18;IL8;	82	7.9e-24
TRINITY_DN10381_c0_g1	G3PWA4_GASAC/676-748	G3PWA4.1 PF00017.22;SH2;	78.9	1.2e-25
TRINITY_DN103_c0_g1	NU3M_DANRE/15-114	Q9MIY3.1 PF00507.17;Oxidored_q4;	90.1	2e-32
TRINITY_DN1042_c0_g1	A0A044UAF4_ONCVO/9-56	A0A044UAF4.1 PF16891.3;STPPase_N;	89.6	1e-15
TRINITY_DN1045_c0_g1	I1QG66_ORYGL/376-586	I1QG66.1 PF00856.26;SET;	100	1.3e-25
TRINITY_DN10481_c0_g1	A0A0K0EVM6_9BILA/284-802	A0A0K0EVM6.1 PF01055.24;Glyco_hydro_31;	49.3	1.4e-12
TRINITY_DN1048_c0_g1	Q7Y1I1_ORYSJ/282-349	Q7Y1I1.1 PF13976.4;gag_pre-integrs;	41.8	6.8e-09
TRINITY_DN10538_c0_g1	A0A0G4KUT2_9PEZI/4-132	A0A0G4KUT2.1 PF15879.3;MWFE;	58.3	2.9e-14
TRINITY_DN10542_c1_g1	A0A0R4ID76_DANRE/81-170	A0A0R4ID76.1 PF00047.23;ig;	61.4	4e-07
TRINITY_DN10551_c0_g2	F1QHP1_DANRE/62-191	F1QHP1.1 PF15255.4;CAP-ZIP_m;	76.1	6.1e-08
TRINITY_DN1055_c0_g1	M4CZR2_BRARP/126-522	M4CZR2.1 PF05686.10;Glyco_transf_90;	83.3	8e-32
TRINITY_DN10575_c0_g1	D7LQ37_ARALL/11-139	D7LQ37.1 PF12165.6;Alfin;	78.5	8.1e-25
TRINITY_DN10576_c0_g2	G3VTA9_SARHA/6-55	G3VTA9.1 PF00253.19;Ribosomal_S14;	94	4.1e-23
TRINITY_DN10601_c0_g1	I1KWH6_SOYBN/115-208	I1KWH6.1 PF00153.25;Mito_carr;	100	3.3e-19
TRINITY_DN10603_c0_g1	F7BUQ2_MONDO/367-431	F7BUQ2.1 PF00013.27;KH_1;	97.6	6.5e-15
TRINITY_DN10614_c1_g1	A0A0E0P1K1_ORYRU/34-116	A0A0E0P1K1.1 PF02298.15;Cu_bind_like;	100	1.3e-35
TRINITY_DN10624_c0_g1	A0A0E0AQW5_9ORYZ/3-331	A0A0E0AQW5.1 PF07851.11;TMPIT;	100	1.7e-29
TRINITY_DN1065_c0_g1	I1KW79_SOYBN/97-398	I1KW79.1 PF00067.20;p450;	100	5.5e-23
TRINITY_DN10669_c0_g1	L8WNT1_THACA/1-59	L8WNT1.1 PF04119.10;HSP9_HSP12;	88.9	9.3e-10
TRINITY_DN1067_c0_g1	Q6NYQ7_DANRE/56-195	Q6NYQ7.1 PF05222.13;AlaDh_PNT_N;	100	1.1e-09
TRINITY_DN10717_c0_g3	F8W4M7_DANRE/592-722	F8W4M7.2 PF00694.17;Aconitase_C;	100	6.8e-53
TRINITY_DN10764_c0_g1	H9GLK7_ANOCA/103-233	H9GLK7.1 PF02812.16;ELFV_dehydrog_N;	94.1	5.1e-41
TRINITY_DN10772_c0_g1	A0A022PYD3_ERYGU/36-218	A0A022PYD3.1 PF01612.18;DNA_pol_A_exo1;	57.9	1.7e-55
TRINITY_DN10778_c0_g1	I1N2M8_SOYBN/73-252	I1N2M8.1 PF02330.14;MAM33;	100	1.4e-25
TRINITY_DN10779_c0_g1	U9TCW2_RHIID/1-205	U9TCW2.1 PF13520.4;AA_permease_2;	68.6	1e-18
TRINITY_DN10809_c0_g1	M5WNV7_PRUPE/41-84	M5WNV7.1 PF01476.18;LysM;	78.6	2.5e-12
TRINITY_DN10811_c0_g1	M5XEZ3_PRUPE/25-158	M5XEZ3.1 PF03188.14;Cytochrom_B561;	65.2	6.7e-44
TRINITY_DN10812_c0_g1	U9UYL7_RHIID/1-429	U9UYL7.1 PF00245.18;Alk_phosphatase;	84.3	2.2e-33
TRINITY_DN10815_c0_g1	CX6B1_HUMAN/19-83	P14854.2 PF02297.15;COX6B;	100	4.1e-35
TRINITY_DN10818_c0_g2	A0A015LRN4_9GLOM/4-333	A0A015LRN4.1 PF10250.7;O-FucT;	53	8.6e-12
TRINITY_DN10821_c0_g2	E7EY51_DANRE/118-200	E7EY51.1 PF08205.10;C2-set_2;	69.7	5.4e-20
TRINITY_DN10830_c0_g1	A0A061GTB2_THECC/72-177	A0A061GTB2.1 PF00085.18;Thioredoxin;	90	6.4e-16
TRINITY_DN10839_c0_g1	G1PMC4_MYOLU/1-129	G1PMC4.1 PF00071.20;Ras;	93.5	1.2e-36
TRINITY_DN10849_c0_g1	B8ARK2_ORYSI/314-734	B8ARK2.1 PF01179.18;Cu_amine_oxid;	100	9e-33
TRINITY_DN10852_c0_g1	A2CF32_DANRE/11-129	A2CF32.1 PF00188.24;CAP;	83.3	4.8e-13
TRINITY_DN10868_c0_g2	Q8WM94_DANRE/23-100	Q8WM94.1 PF00993.18;MHC_II_alpha;	75.6	1.9e-29
TRINITY_DN10868_c0_g3	Q1MTC7_DANRE/103-187	Q1MTC7.1 PF07654.13;C1-set;	76.5	3.1e-32
TRINITY_DN10880_c0_g1	M1CF79_SOLTU/48-174	M1CF79.1 PF06658.10;DUF1168;	66.7	1.2e-08
TRINITY_DN10888_c0_g1	A0A067K443_JATCU/24-175	A0A067K443.1 PF01625.19;PMSR;	84.1	2.4e-70
TRINITY_DN1088_c0_g1	J9P098_CANLF/23-89	J9P098.1 PF01423.20;LSM;	94.9	2.3e-25
TRINITY_DN10890_c0_g1	I1MXK5_SOYBN/4-325	I1MXK5.1 PF01112.16;Asparaginase_2;	98.5	3.2e-30
TRINITY_DN10902_c0_g1	C6SZ33_SOYBN/1-89	C6SZ33.1 PF03242.11;LEA_3;	96	3.1e-16
TRINITY_DN10904_c0_g1	G3VIM6_SARHA/12-168	G3VIM6.1 PF00179.24;UQ_con;	100	1.1e-35
TRINITY_DN10910_c0_g1	F1QNI7_DANRE/32-449	F1QNI7.2 PF13520.4;AA_permease_2;	94.6	2.4e-31
TRINITY_DN10928_c0_g1	H2MYQ5_ORYLA/19-127	H2MYQ5.1 PF01776.15;Ribosomal_L22e;	97.1	5.9e-52
TRINITY_DN10932_c0_g1	H0VN18_CAVPO/2-140	H0VN18.1 PF00235.17;Profilin;	92.7	5.6e-61
TRINITY_DN10944_c0_g1	F1Q6R4_DANRE/283-309	F1Q6R4.1 PF00880.16;Nebulin;	100	7.5e-07
TRINITY_DN10959_c1_g1	A0A0R4IB28_DANRE/52-83	A0A0R4IB28.1 PF11413.6;HIF-1;	96.9	1.1e-08
TRINITY_DN10959_c1_g2	A0A0R4IB28_DANRE/52-83	A0A0R4IB28.1 PF11413.6;HIF-1;	100	2e-09
TRINITY_DN11010_c0_g1	B8AB07_ORYSI/206-313	B8AB07.1 PF00179.24;UQ_con;	50.7	1.7e-06
TRINITY_DN11012_c0_g1	A0A0D2TBV0_GOSRA/17-94	A0A0D2TBV0.1 PF03386.12;ENOD93;	93.3	9.4e-21
TRINITY_DN11034_c0_g1	A5AS62_VITVI/47-149	A5AS62.1 PF13664.4;DUF4149;	88.3	3.5e-48
TRINITY_DN1103_c0_g1	I1JNY7_SOYBN/54-311	I1JNY7.1 PF00290.18;Trp_syntA;	95.6	4.3e-30
TRINITY_DN11041_c0_g1	C6T1E0_SOYBN/4-84	C6T1E0.1 PF00887.17;ACBP;	100	3.1e-27
TRINITY_DN11045_c0_g1	M0RJ82_MUSAM/66-139	M0RJ82.1 PF02201.16;SWIB;	85.1	1.4e-29
TRINITY_DN11079_c0_g1	V4TUF1_9ROSI/17-82	V4TUF1.1 PF01423.20;LSM;	100	7.7e-31
TRINITY_DN11100_c1_g1	D7LZP7_ARALL/30-259	D7LZP7.1 PF01201.20;Ribosomal_S8e;	100	2e-08
TRINITY_DN11148_c0_g1	A0A087GZW4_ARAAL/573-688	A0A087GZW4.1 PF07717.14;OB_NTP_bind;	96.4	8.8e-28
TRINITY_DN11176_c0_g1	A0A0D3F9B3_9ORYZ/702-1182	A0A0D3F9B3.1 PF00521.18;DNA_topoisoIV;	98.7	8.4e-32
TRINITY_DN11176_c0_g2	A0A0D3F9B3_9ORYZ/702-1182	A0A0D3F9B3.1 PF00521.18;DNA_topoisoIV;	100	3.1e-23
TRINITY_DN11178_c0_g1	A0A0E0BDF9_9ORYZ/126-361	A0A0E0BDF9.1 PF01063.17;Aminotran_4;	100	3e-41
TRINITY_DN11190_c0_g1	I4EMN3_9CHLR/13-171	I4EMN3.1 PF00078.25;RVT_1;	83	4.1e-16
TRINITY_DN1119_c0_g2	A0A0J8BKM3_BETVU/59-495	A0A0J8BKM3.1 PF01474.14;DAHP_synth_2;	92.4	8.2e-38
TRINITY_DN11215_c0_g1	I1PD23_ORYGL/9-129	I1PD23.1 PF05348.9;UMP1;	100	3.7e-41
TRINITY_DN1131_c0_g1	V7BSE5_PHAVU/41-132	V7BSE5.1 PF12796.5;Ank_2;	100	2e-10
TRINITY_DN11338_c0_g3	A0A087YJ59_POEFO/104-234	A0A087YJ59.1 PF13893.4;RRM_5;	87.8	5.7e-33
TRINITY_DN11394_c0_g1	Q6PH62_DANRE/2-184	Q6PH62.1 PF05038.11;Cytochrom_B558a;	93.7	6.4e-38
TRINITY_DN11397_c0_g1	L5M755_MYODS/142-226	L5M755.1 PF00736.17;EF1_GNE;	88.3	1.3e-32
TRINITY_DN11439_c0_g1	V7B2H9_PHAVU/71-203	V7B2H9.1 PF02453.15;Reticulon;	92.6	5.6e-27
TRINITY_DN1144_c0_g1	B6AF70_CRYMR/311-415	B6AF70.1 PF00171.20;Aldedh;	71	1e-19
TRINITY_DN11459_c0_g1	J9M4D0_ACYPI/169-267	J9M4D0.2 PF07727.12;RVT_2;	50	3e-06
TRINITY_DN11470_c0_g1	W5IC20_WHEAT/28-318	W5IC20.1 PF00069.23;Pkinase;	93	1.2e-32
TRINITY_DN11503_c0_g1	B9GJQ7_POPTR/333-403	B9GJQ7.2 PF12796.5;Ank_2;	68.7	5.2e-21
TRINITY_DN11536_c0_g1	A0A093DGT3_CHAPE/81-368	A0A093DGT3.1 PF00069.23;Pkinase;	97	4.7e-34
TRINITY_DN11546_c0_g1	A0A0E0RI77_ORYRU/68-135	A0A0E0RI77.1 PF00550.23;PP-binding;	100	2.7e-16
TRINITY_DN11581_c0_g1	I1K111_SOYBN/7-146	I1K111.1 PF00335.18;Tetraspannin;	100	2.4e-32
TRINITY_DN11620_c0_g1	I1Q570_ORYGL/185-333	I1Q570.1 PF08231.10;SYF2;	100	5.6e-23
TRINITY_DN11639_c0_g1	A0A022RAW2_ERYGU/9-64	A0A022RAW2.1 PF04568.10;IATP;	76.1	8.9e-08
TRINITY_DN11640_c0_g1	K3Z8N2_SETIT/89-261	K3Z8N2.1 PF04144.11;SCAMP;	96.1	1.5e-36
TRINITY_DN11644_c0_g1	Q1LXQ4_DANRE/141-256	Q1LXQ4.1 PF00059.19;Lectin_C;	70.5	3.2e-34
TRINITY_DN11660_c0_g1	A0A0B0N0T2_GOSAR/7-71	A0A0B0N0T2.1 PF04212.16;MIT;	95.4	2.8e-27
TRINITY_DN11668_c0_g1	W5KMF5_ASTMX/3-83	W5KMF5.1 PF00887.17;ACBP;	90.9	1.3e-31
TRINITY_DN11670_c0_g1	A0A0P7UYD4_9TELE/59-195	A0A0P7UYD4.1 PF03188.14;Cytochrom_B561;	92.6	3.6e-07
TRINITY_DN11676_c0_g1	A0A0D9ZW05_9ORYZ/49-270	A0A0D9ZW05.1 PF00230.18;MIP;	100	4.5e-33
TRINITY_DN11701_c0_g1	U9T7V2_RHIID/12-84	U9T7V2.1 PF00347.21;Ribosomal_L6;	77.6	6.9e-12
TRINITY_DN11706_c0_g1	M5X8D6_PRUPE/161-248	M5X8D6.1 PF00031.19;Cystatin;	80.3	1.2e-25
TRINITY_DN11711_c0_g3	V8PD64_OPHHA/15-40	V8PD64.1 PF00642.22;zf-CCCH;	92.3	7.3e-07
TRINITY_DN11745_c1_g1	Q5NJJ5_DANRE/217-252	Q5NJJ5.1 PF14670.4;FXa_inhibition;	100	6.3e-16
TRINITY_DN11773_c0_g1	M0ZP16_SOLTU/52-250	M0ZP16.1 PF01997.14;Translin;	85.9	1.1e-93
TRINITY_DN11774_c0_g1	GLU2_MAIZE/86-213	P04706.1 PF00234.20;Tryp_alpha_amyl;	99	3.1e-26
TRINITY_DN11782_c0_g1	I1LIN6_SOYBN/76-159	I1LIN6.1 PF01357.19;Pollen_allerg_1;	100	2.5e-20
TRINITY_DN11804_c0_g1	A0A0E0Q5N0_ORYRU/46-151	A0A0E0Q5N0.1 PF00234.20;Tryp_alpha_amyl;	99	1.3e-54
TRINITY_DN11815_c0_g1	A0A0J8B5L6_BETVU/2-103	A0A0J8B5L6.1 PF02519.12;Auxin_inducible;	74.5	3e-38
TRINITY_DN11819_c0_g1	M4DN30_BRARP/608-768	M4DN30.1 PF00078.25;RVT_1;	81.1	5.1e-42
TRINITY_DN11822_c0_g1	A0A0D3GH81_9ORYZ/20-64	A0A0D3GH81.1 PF00321.15;Thionin;	95.6	2.2e-19
TRINITY_DN11847_c0_g1	A0A0D3HEF7_9ORYZ/21-308	A0A0D3HEF7.1 PF07063.11;DUF1338;	100	1e-36
TRINITY_DN11856_c0_g2	A0A061F7A6_THECC/86-240	A0A061F7A6.1 PF00650.18;CRAL_TRIO;	77.5	5.6e-11
TRINITY_DN11857_c0_g1	A0A059D2Q1_EUCGR/7-106	A0A059D2Q1.1 PF03195.12;DUF260;	90	6.3e-26
TRINITY_DN11863_c0_g1	F1QYS7_DANRE/62-118	F1QYS7.1 PF16177.3;ACAS_N;	93.6	3.7e-21
TRINITY_DN11873_c0_g1	V7AKN6_PHAVU/2-34	V7AKN6.1 PF05627.9;AvrRpt-cleavage;	96.7	1.8e-10
TRINITY_DN11876_c0_g1	L9KY99_TUPCH/5-130	L9KY99.1 PF00410.17;Ribosomal_S8;	100	4.7e-68
TRINITY_DN11878_c0_g1	A0A0R4IWU5_DANRE/23-52	A0A0R4IWU5.1 PF11628.6;TCR_zetazeta;	89.3	5.7e-06
TRINITY_DN11894_c0_g3	F1QD17_DANRE/5-70	F1QD17.1 PF08156.11;NOP5NT;	90	3.3e-22
TRINITY_DN11898_c0_g1	A0A0R0H0L0_SOYBN/244-309	A0A0R0H0L0.1 PF00191.18;Annexin;	100	1.5e-22
TRINITY_DN11898_c1_g1	A0A0R0GZF0_SOYBN/14-79	A0A0R0GZF0.1 PF00191.18;Annexin;	100	1.4e-17
TRINITY_DN11935_c0_g1	I1NAD0_SOYBN/60-299	I1NAD0.1 PF00121.16;TIM;	98.9	5.6e-43
TRINITY_DN11942_c0_g3	I1K5B7_SOYBN/262-425	I1K5B7.1 PF13489.4;Methyltransf_23;	100	2.3e-37
TRINITY_DN11953_c0_g1	W9S2Q4_9ROSA/236-463	W9S2Q4.1 PF03514.12;GRAS;	84.5	3.9e-23
TRINITY_DN11959_c0_g1	ELO6_CAEEL/25-263	Q20303.1 PF01151.16;ELO;	55.7	1.1e-10
TRINITY_DN11992_c0_g1	S8CQ69_9LAMI/179-249	S8CQ69.1 PF00013.27;KH_1;	68.3	4.9e-08
TRINITY_DN12011_c0_g1	I1NXN9_ORYGL/34-154	I1NXN9.1 PF01597.17;GCV_H;	100	3.3e-30
TRINITY_DN12016_c0_g1	U3JB06_DANRE/5-107	U3JB06.1 PF00268.19;Ribonuc_red_sm;	100	8.3e-19
TRINITY_DN12016_c0_g3	F6WXL4_MACMU/79-278	F6WXL4.1 PF00268.19;Ribonuc_red_sm;	95.7	1.1e-30
TRINITY_DN12072_c0_g1	A0A015I1L6_9GLOM/13-73	A0A015I1L6.1 PF00536.28;SAM_1;	81.7	7.4e-19
TRINITY_DN1209_c0_g1	V7CT96_PHAVU/184-477	V7CT96.1 PF00393.17;6PGD;	93.7	1e-35
TRINITY_DN12124_c0_g1	H3G2Z1_PRIPA/307-377	H3G2Z1.1 PF04155.16;Ground-like;	58	3.2e-14
TRINITY_DN12142_c0_g1	M5WMK3_PRUPE/502-956	M5WMK3.1 PF00501.26;AMP-binding;	77.9	2.8e-26
TRINITY_DN12145_c0_g1	B9T2E3_RICCO/64-186	B9T2E3.1 PF00188.24;CAP;	78.9	1.3e-56
TRINITY_DN12175_c0_g1	I1KR41_SOYBN/149-364	I1KR41.1 PF07970.10;COPIIcoated_ERV;	100	7.6e-19
TRINITY_DN12176_c0_g1	A0A0E0JH51_ORYPU/369-530	A0A0E0JH51.1 PF17177.2;PPR_long;	95.2	3.4e-37
TRINITY_DN12184_c0_g1	B8JMD0_DANRE/5-207	B8JMD0.1 PF01213.17;CAP_N;	63	7.9e-06
TRINITY_DN12203_c0_g1	K7MKM1_SOYBN/437-480	K7MKM1.1 PF00569.15;ZZ;	100	1.3e-21
TRINITY_DN12218_c0_g1	K7KGL0_SOYBN/85-379	K7KGL0.1 PF07887.9;Calmodulin_bind;	100	1.2e-21
TRINITY_DN12243_c0_g1	A0A0A2VSE2_BEABA/79-267	A0A0A2VSE2.1 PF00161.17;RIP;	36.8	5.3e-26
TRINITY_DN12247_c0_g1	A0A0R0GQL4_SOYBN/24-278	A0A0R0GQL4.1 PF00069.23;Pkinase;	100	1.3e-37
TRINITY_DN1224_c0_g2	C6T3N6_SOYBN/4-77	C6T3N6.1 PF02798.18;GST_N;	100	1.7e-35
TRINITY_DN1228_c0_g1	A0A0D9ZF85_9ORYZ/51-170	A0A0D9ZF85.1 PF00861.20;Ribosomal_L18p;	100	1.4e-14
TRINITY_DN12309_c0_g2	A0A0D9ZDF0_9ORYZ/170-527	A0A0D9ZDF0.1 PF00343.18;Phosphorylase;	100	6.3e-37
TRINITY_DN12309_c0_g3	A0A0D9ZDF0_9ORYZ/170-527	A0A0D9ZDF0.1 PF00343.18;Phosphorylase;	100	4.2e-21
TRINITY_DN12327_c0_g1	G7NTC9_MACFA/4-172	G7NTC9.1 PF01965.22;DJ-1_PfpI;	100	1.6e-19
TRINITY_DN12337_c0_g1	I1J8F8_SOYBN/295-510	I1J8F8.1 PF07714.15;Pkinase_Tyr;	100	9e-33
TRINITY_DN12337_c0_g3	B8BNB9_ORYSI/251-499	B8BNB9.1 PF07714.15;Pkinase_Tyr;	100	5.2e-36
TRINITY_DN12350_c0_g2	B9S2E1_RICCO/152-209	B9S2E1.1 PF13812.4;PPR_3;	46.9	1.1e-07
TRINITY_DN12370_c0_g2	K7KI11_SOYBN/547-824	K7KI11.1 PF00069.23;Pkinase;	100	8e-41
TRINITY_DN12373_c0_g1	Q6XG62_DANRE/6-48	Q6XG62.1 PF01023.17;S_100;	100	2.4e-15
TRINITY_DN12373_c0_g2	W5MJW5_LEPOC/14-56	W5MJW5.1 PF01023.17;S_100;	83.7	4.8e-12
TRINITY_DN12393_c0_g1	A0A0E0NHI8_ORYRU/52-98	A0A0E0NHI8.1 PF00643.22;zf-B_box;	97.9	3.3e-21
TRINITY_DN12413_c0_g1	A0A0E0MMG3_ORYPU/16-121	A0A0E0MMG3.1 PF01920.18;Prefoldin_2;	98.6	6.3e-30
TRINITY_DN12417_c0_g1	A0A0D9VBW2_9ORYZ/55-1185	A0A0D9VBW2.1 PF02463.17;SMC_N;	100	1.8e-31
TRINITY_DN12422_c0_g1	D5ILC3_SOLTU/89-223	D5ILC3.1 PF00334.17;NDK;	90.1	4.6e-32
TRINITY_DN12423_c0_g1	Q5XJR0_DANRE/32-94	Q5XJR0.1 PF01176.17;eIF-1a;	98.1	8.7e-23
TRINITY_DN12428_c0_g2	A0A096QH93_MAIZE/131-264	A0A096QH93.1 PF02915.15;Rubrerythrin;	97	2.8e-71
TRINITY_DN12453_c0_g2	B3DG37_DANRE/8-112	B3DG37.1 PF00042.20;Globin;	75	2.1e-27
TRINITY_DN12455_c0_g1	H2U5Z5_TAKRU/743-821	H2U5Z5.1 PF02020.16;W2;	97.4	1.1e-13
TRINITY_DN12481_c0_g1	J3LEQ2_ORYBR/475-536	J3LEQ2.1 PF13855.4;LRR_8;	98.4	2.3e-24
TRINITY_DN12486_c0_g1	A0A0N5B084_9BILA/93-777	A0A0N5B084.1 PF00063.19;Myosin_head;	90	2.8e-24
TRINITY_DN12530_c0_g1	I1MGI7_SOYBN/458-513	I1MGI7.1 PF16186.3;Arm_3;	98.2	3.2e-24
TRINITY_DN12564_c0_g1	V7BMY6_PHAVU/125-458	V7BMY6.1 PF00291.23;PALP;	100	1.9e-07
TRINITY_DN12586_c0_g1	Q2QWV1_ORYSJ/34-465	Q2QWV1.1 PF01490.16;Aa_trans;	100	3.2e-36
TRINITY_DN12592_c1_g2	R0HFQ5_9BRAS/483-624	R0HFQ5.1 PF00078.25;RVT_1;	46.6	3.8e-10
TRINITY_DN12594_c0_g2	A0A0D9SD52_CHLSB/54-121	A0A0D9SD52.1 PF04505.10;CD225;	96.1	2.2e-19
TRINITY_DN12594_c0_g3	IFM3_RAT/54-129	P26376.1 PF04505.10;CD225;	100	1.8e-08
TRINITY_DN12622_c0_g1	V7AZR7_PHAVU/6-74	V7AZR7.1 PF06522.9;B12D;	96.9	1.1e-28
TRINITY_DN12636_c0_g2	A0A044TEP4_ONCVO/231-267	A0A044TEP4.1 PF00400.30;WD40;	97.3	5.7e-15
TRINITY_DN12643_c0_g1	F7G9F5_MONDO/95-128	F7G9F5.2 PF16211.3;Histone_H2A_C;	100	4.9e-11
TRINITY_DN12653_c0_g1	I3KEJ4_ORENI/13-139	I3KEJ4.1 PF00828.17;Ribosomal_L27A;	61	2.8e-20
TRINITY_DN12653_c0_g2	I3KEJ4_ORENI/13-139	I3KEJ4.1 PF00828.17;Ribosomal_L27A;	62.8	1.6e-22
TRINITY_DN12671_c0_g1	I1R5U9_ORYGL/72-472	I1R5U9.1 PF00464.17;SHMT;	98.5	1.3e-31
TRINITY_DN12711_c0_g1	A0A067GJT7_CITSI/145-244	A0A067GJT7.1 PF01657.15;Stress-antifung;	54.5	1.1e-22
TRINITY_DN12714_c0_g1	A0A0D3FFH4_9ORYZ/335-784	A0A0D3FFH4.1 PF01055.24;Glyco_hydro_31;	94.5	6.4e-44
TRINITY_DN12735_c0_g1	W9RCY8_9ROSA/69-152	W9RCY8.1 PF09793.7;AD;	81	5.8e-29
TRINITY_DN12738_c0_g1	A0A059A7K2_EUCGR/250-391	A0A059A7K2.1 PF00892.18;EamA;	78.9	3.8e-60
TRINITY_DN12765_c0_g1	X1WBS6_DANRE/226-295	X1WBS6.2 PF00653.19;BIR;	85.3	3.6e-10
TRINITY_DN12776_c0_g1	W5LHD9_ASTMX/64-292	W5LHD9.1 PF07228.10;SpoIIE;	93.1	7.5e-30
TRINITY_DN12788_c0_g1	Q3U9R0_MOUSE/222-270	Q3U9R0.1 PF07645.13;EGF_CA;	100	2.4e-23
TRINITY_DN12788_c1_g1	M3W3D7_FELCA/1-54	M3W3D7.1 PF07645.13;EGF_CA;	81.4	1e-13
TRINITY_DN12819_c0_g1	C5XVB4_SORBI/4-88	C5XVB4.1 PF01780.17;Ribosomal_L37ae;	100	9.4e-42
TRINITY_DN12840_c0_g2	A2BIR0_DANRE/322-384	A2BIR0.2 PF13897.4;GOLD_2;	81.8	2.9e-07
TRINITY_DN12883_c0_g1	E7FDG0_DANRE/126-323	E7FDG0.2 PF00169.27;PH;	98.6	3e-31
TRINITY_DN1289_c0_g1	A0A0E0JWG7_ORYPU/5-189	A0A0E0JWG7.1 PF00227.24;Proteasome;	91.9	2.2e-12
TRINITY_DN1290_c0_g1	Q0IZZ4_ORYSJ/1-64	Q0IZZ4.1 PF00550.23;PP-binding;	100	3.7e-22
TRINITY_DN12919_c0_g1	Q8S0T6_ORYSJ/35-193	Q8S0T6.1 PF04862.10;DUF642;	100	1e-31
TRINITY_DN12919_c0_g2	I1NRR2_ORYGL/204-372	I1NRR2.1 PF04862.10;DUF642;	100	1.1e-43
TRINITY_DN12940_c0_g1	I1JPX8_SOYBN/11-358	I1JPX8.1 PF00274.17;Glycolytic;	100	1e-31
TRINITY_DN12944_c0_g1	W5LGN1_ASTMX/82-140	W5LGN1.1 PF00076.20;RRM_1;	97.7	3e-19
TRINITY_DN12956_c0_g2	G7KFR6_MEDTR/12-173	G7KFR6.1 PF00071.20;Ras;	100	2.8e-15
TRINITY_DN12960_c0_g1	H7BYH4_HUMAN/1-131	H7BYH4.1 PF00080.18;Sod_Cu;	100	3.9e-50
TRINITY_DN12962_c0_g1	A0A0D9YUV9_9ORYZ/7-156	A0A0D9YUV9.1 PF08212.10;Lipocalin_2;	100	1.7e-28
TRINITY_DN12965_c0_g1	A0A0K6GFK7_9HOMO/10-266	A0A0K6GFK7.1 PF01370.19;Epimerase;	75.9	3e-15
TRINITY_DN12976_c0_g1	B9S7E6_RICCO/87-393	B9S7E6.1 PF03372.21;Exo_endo_phos;	71.2	6.8e-17
TRINITY_DN12979_c0_g1	F1Q4L4_DANRE/1-38	F1Q4L4.1 PF04419.12;4F5;	100	2.1e-10
TRINITY_DN12997_c0_g1	M5X320_PRUPE/173-314	M5X320.1 PF02338.17;OTU;	80.3	5.5e-63
TRINITY_DN13007_c1_g1	W5HVW8_WHEAT/440-692	W5HVW8.1 PF00069.23;Pkinase;	96	6.6e-37
TRINITY_DN13007_c1_g3	M0XQT8_HORVD/326-592	M0XQT8.1 PF00069.23;Pkinase;	97.4	1.1e-37
TRINITY_DN13017_c0_g1	I1JZA1_SOYBN/401-753	I1JZA1.1 PF01237.16;Oxysterol_BP;	100	6.3e-44
TRINITY_DN13029_c0_g1	A0A078DYC2_BRANA/969-1107	A0A078DYC2.1 PF07304.9;SRA1;	76.8	1e-23
TRINITY_DN13098_c0_g1	K7M4W2_SOYBN/893-1093	K7M4W2.1 PF14533.4;USP7_C2;	98.5	8.3e-31
TRINITY_DN13109_c0_g1	I1KU63_SOYBN/1850-2168	I1KU63.1 PF02889.14;Sec63;	100	1.7e-34
TRINITY_DN13116_c0_g1	A0A061EA59_THECC/84-196	A0A061EA59.1 PF00583.23;Acetyltransf_1;	85.8	2.2e-52
TRINITY_DN13118_c0_g1	M0YUH3_HORVD/54-199	M0YUH3.1 PF01694.20;Rhomboid;	94.8	2.3e-32
TRINITY_DN13121_c0_g1	I1JQN7_SOYBN/35-184	I1JQN7.1 PF04043.13;PMEI;	100	4.7e-14
TRINITY_DN13123_c0_g1	B8BDZ6_ORYSI/941-1186	B8BDZ6.1 PF07727.12;RVT_2;	63.5	1e-11
TRINITY_DN13135_c0_g1	W5MW64_LEPOC/17-284	W5MW64.1 PF01267.15;F-actin_cap_A;	89.2	3.2e-29
TRINITY_DN13135_c0_g2	A0A0P7TLR3_9TELE/17-284	A0A0P7TLR3.1 PF01267.15;F-actin_cap_A;	94	5.7e-32
TRINITY_DN13141_c0_g1	F1QYN0_DANRE/1379-1474	F1QYN0.2 PF07677.12;A2M_recep;	64.1	1.6e-17
TRINITY_DN13147_c0_g1	W5NCX3_LEPOC/225-326	W5NCX3.1 PF00153.25;Mito_carr;	84	9.1e-30
TRINITY_DN13147_c0_g2	MFRN1_DANRE/29-123	Q287T7.1 PF00153.25;Mito_carr;	94.6	3.6e-11
TRINITY_DN13147_c0_g3	B3DKD7_DANRE/128-218	B3DKD7.1 PF00153.25;Mito_carr;	97.6	4.6e-39
TRINITY_DN13179_c0_g2	A0A096MR05_PAPAN/1-224	A0A096MR05.1 PF05529.10;Bap31;	97	1.2e-24
TRINITY_DN13209_c0_g2	H2L3X8_ORYLA/93-463	H2L3X8.1 PF01130.19;CD36;	81.4	1.6e-08
TRINITY_DN13218_c0_g1	Q6NW62_DANRE/6-58	Q6NW62.1 PF16274.3;Qua1;	100	3.9e-08
TRINITY_DN13247_c0_g1	M4A0B7_XIPMA/345-407	M4A0B7.1 PF00076.20;RRM_1;	92	9.1e-17
TRINITY_DN13256_c0_g1	F2T5X8_AJEDA/54-434	F2T5X8.1 PF07690.14;MFS_1;	56	3.5e-14
TRINITY_DN13258_c0_g1	A0A0N4YXW3_NIPBR/1-335	A0A0N4YXW3.1 PF01576.17;Myosin_tail_1;	74.6	5.8e-16
TRINITY_DN13279_c0_g1	I1MU98_SOYBN/8-172	I1MU98.1 PF04939.10;RRS1;	89.6	1e-27
TRINITY_DN13344_c0_g1	A0A0K0E1M7_STRER/111-611	A0A0K0E1M7.1 PF00501.26;AMP-binding;	45.3	8.9e-10
TRINITY_DN13345_c0_g1	A0A0D9WH75_9ORYZ/48-252	A0A0D9WH75.1 PF09778.7;Guanylate_cyc_2;	96.9	2.2e-45
TRINITY_DN13348_c0_g1	A0A0D2PY75_GOSRA/6-56	A0A0D2PY75.1 PF00253.19;Ribosomal_S14;	84.3	3.6e-23
TRINITY_DN1336_c0_g1	B9SAV0_RICCO/308-568	B9SAV0.1 PF07714.15;Pkinase_Tyr;	62.5	5.7e-21
TRINITY_DN13372_c0_g1	B8A3E0_MAIZE/36-125	B8A3E0.1 PF00234.20;Tryp_alpha_amyl;	100	2.9e-27
TRINITY_DN13388_c0_g1	M0SQ63_MUSAM/104-260	M0SQ63.1 PF00644.18;PARP;	59.4	4.3e-14
TRINITY_DN13391_c0_g1	C6T1N0_SOYBN/35-160	C6T1N0.1 PF00188.24;CAP;	100	7.3e-70
TRINITY_DN13396_c0_g1	A0A0E0MKC9_ORYPU/145-445	A0A0E0MKC9.1 PF00676.18;E1_dh;	92.9	9.8e-30
TRINITY_DN13402_c0_g1	F6HKE8_VITVI/104-396	F6HKE8.1 PF01095.17;Pectinesterase;	85.7	1.8e-28
TRINITY_DN1340_c0_g1	A0A0E0L6J4_ORYPU/5-370	A0A0E0L6J4.1 PF03223.13;V-ATPase_C;	100	3.6e-32
TRINITY_DN13412_c0_g2	C0PLV0_MAIZE/318-359	C0PLV0.1 PF00400.30;WD40;	95.1	8.9e-18
TRINITY_DN13417_c0_g1	F7GNG8_MACMU/1-169	F7GNG8.1 PF00573.20;Ribosomal_L4;	100	1.1e-55
TRINITY_DN13440_c0_g1	A0A067L477_JATCU/35-118	A0A067L477.1 PF13774.4;Longin;	50	4e-08
TRINITY_DN13441_c0_g1	B8A9G9_ORYSI/362-434	B8A9G9.1 PF07983.11;X8;	100	8.7e-38
TRINITY_DN13469_c0_g1	G3PWA4_GASAC/402-504	G3PWA4.1 PF00169.27;PH;	72.1	5e-23
TRINITY_DN13479_c0_g2	I1N5P4_SOYBN/56-330	I1N5P4.1 PF01073.17;3Beta_HSD;	100	9.7e-36
TRINITY_DN13481_c0_g1	A0A067L6X9_JATCU/78-412	A0A067L6X9.1 PF00282.17;Pyridoxal_deC;	89.2	2.7e-35
TRINITY_DN13482_c0_g1	I1MYV4_SOYBN/76-304	I1MYV4.1 PF01269.15;Fibrillarin;	100	1.4e-26
TRINITY_DN13501_c0_g1	Q5U369_DANRE/110-175	Q5U369.1 PF00191.18;Annexin;	84.8	1.1e-21
TRINITY_DN13502_c0_g1	K4CAM3_SOLLC/78-138	K4CAM3.1 PF02427.15;PSI_PsaE;	86.7	7e-08
TRINITY_DN13505_c0_g1	C6SXJ9_SOYBN/3-109	C6SXJ9.1 PF02271.14;UCR_14kD;	98.7	9.7e-36
TRINITY_DN13563_c0_g1	I1K060_SOYBN/98-423	I1K060.1 PF00069.23;Pkinase;	97.3	2.3e-34
TRINITY_DN13583_c0_g1	W5BF08_WHEAT/49-516	W5BF08.1 PF00171.20;Aldedh;	100	1.1e-25
TRINITY_DN13586_c0_g1	H2MK66_ORYLA/29-506	H2MK66.1 PF00478.23;IMPDH;	96.7	1.8e-26
TRINITY_DN13594_c0_g1	D7U9N2_VITVI/38-423	D7U9N2.1 PF01490.16;Aa_trans;	75.3	1.6e-159
TRINITY_DN13597_c1_g1	F8VV56_HUMAN/1-137	F8VV56.1 PF00335.18;Tetraspannin;	100	9.7e-55
TRINITY_DN13612_c0_g1	A0A0R4IHS9_DANRE/9-79	A0A0R4IHS9.1 PF00076.20;RRM_1;	98.6	2.7e-33
TRINITY_DN13617_c0_g1	B9HVB9_POPTR/1-155	B9HVB9.1 PF14009.4;DUF4228;	77.6	1.8e-15
TRINITY_DN13618_c0_g1	E9PZ62_MOUSE/7-99	E9PZ62.1 PF02996.15;Prefoldin;	100	1.7e-18
TRINITY_DN13635_c0_g1	Q1LW00_DANRE/76-263	Q1LW00.1 PF01400.22;Astacin;	100	1.7e-12
TRINITY_DN13638_c0_g1	Q65WU6_ORYSJ/623-852	Q65WU6.1 PF10536.7;PMD;	39	3.3e-07
TRINITY_DN13652_c0_g1	Q5RHQ7_DANRE/416-560	Q5RHQ7.1 PF13671.4;AAA_33;	100	1.9e-40
TRINITY_DN1367_c0_g1	G1NZD3_MYOLU/16-125	G1NZD3.1 PF01248.24;Ribosomal_L7Ae;	91.1	3.8e-49
TRINITY_DN13683_c0_g1	A0A067KYS1_JATCU/31-507	A0A067KYS1.1 PF00232.16;Glyco_hydro_1;	75.3	1.5e-31
TRINITY_DN1368_c0_g1	A0A0E0BKG4_9ORYZ/820-1030	A0A0E0BKG4.1 PF14533.4;USP7_C2;	100	1.1e-13
TRINITY_DN136_c0_g1	A0A0J8BEQ8_BETVU/593-726	A0A0J8BEQ8.1 PF02902.17;Peptidase_C48;	37.5	5.2e-09
TRINITY_DN13702_c0_g1	A0A0R4J419_SOYBN/4-98	A0A0R4J419.1 PF02519.12;Auxin_inducible;	70.8	3.9e-27
TRINITY_DN1372_c0_g1	I1L7A3_SOYBN/44-293	I1L7A3.1 PF00141.21;peroxidase;	94.4	9.7e-30
TRINITY_DN13734_c0_g2	V7CQH6_PHAVU/27-300	V7CQH6.1 PF01459.20;Porin_3;	95.8	6.6e-34
TRINITY_DN13744_c0_g1	W1PMD8_AMBTC/192-274	W1PMD8.1 PF00400.30;WD40;	75.9	7.7e-31
TRINITY_DN13752_c0_g1	F1LDQ4_ASCSU/95-169	F1LDQ4.1 PF00900.18;Ribosomal_S4e;	75.5	8e-15
TRINITY_DN13755_c0_g1	K4C6M2_SOLLC/24-151	K4C6M2.1 PF04073.13;tRNA_edit;	81.2	1.9e-54
TRINITY_DN13771_c0_g1	A0A0E0K7D2_ORYPU/1033-1831	A0A0E0K7D2.1 PF02364.13;Glucan_synthase;	100	4.1e-30
TRINITY_DN13809_c1_g1	A0A0K9P1E6_ZOSMR/207-362	A0A0K9P1E6.1 PF02517.14;Abi;	100	1e-07
TRINITY_DN13811_c0_g1	Q1LXB0_DANRE/1-114	Q1LXB0.1 PF07742.10;BTG;	91.1	1.4e-13
TRINITY_DN13824_c0_g1	A5BE55_VITVI/34-347	A5BE55.1 PF00657.20;Lipase_GDSL;	71.6	3.9e-20
TRINITY_DN13824_c0_g2	M5WSW8_PRUPE/38-351	M5WSW8.1 PF00657.20;Lipase_GDSL;	88.2	1.6e-29
TRINITY_DN13826_c0_g1	I1QM94_ORYGL/1-754	I1QM94.1 PF13764.4;E3_UbLigase_R4;	98.7	1.7e-32
TRINITY_DN13826_c0_g2	I1QM94_ORYGL/1-754	I1QM94.1 PF13764.4;E3_UbLigase_R4;	98.6	1.2e-16
TRINITY_DN13829_c0_g1	B9H869_POPTR/5-70	B9H869.1 PF01423.20;LSM;	98.3	3.6e-24
TRINITY_DN13837_c0_g1	A0A0D2RV59_GOSRA/373-471	A0A0D2RV59.1 PF01061.22;ABC2_membrane;	71.7	4.3e-19
TRINITY_DN13845_c0_g1	K7ML58_SOYBN/9-130	K7ML58.1 PF00903.23;Glyoxalase;	95.8	7.4e-34
TRINITY_DN13847_c0_g2	G1L8K7_AILME/63-138	G1L8K7.1 PF00017.22;SH2;	100	1.6e-15
TRINITY_DN13847_c0_g5	I3J002_ORENI/615-689	I3J002.1 PF00017.22;SH2;	94.1	3.4e-31
TRINITY_DN13849_c0_g1	K4CL79_SOLLC/45-110	K4CL79.1 PF00462.22;Glutaredoxin;	64.2	2.5e-13
TRINITY_DN13864_c0_g1	Q8HC78_ORYLA/88-253	Q8HC78.1 PF13631.4;Cytochrom_B_N_2;	68	7.7e-45
TRINITY_DN13864_c0_g2	CYB_HUMAN/18-204	P00156.2 PF00033.17;Cytochrome_B;	95.2	2.4e-48
TRINITY_DN13864_c0_g4	CYB_DANRE/18-204	Q9MIX8.1 PF00033.17;Cytochrome_B;	93	2.2e-90
TRINITY_DN13886_c0_g2	I1NF97_SOYBN/159-433	I1NF97.1 PF05278.10;PEARLI-4;	100	3.3e-27
TRINITY_DN13887_c0_g1	V7CLA5_PHAVU/78-205	V7CLA5.1 PF03168.11;LEA_2;	39.8	2.1e-18
TRINITY_DN13888_c0_g1	W5B2K2_WHEAT/107-203	W5B2K2.1 PF04800.10;ETC_C1_NDUFA4;	87.6	2.2e-46
TRINITY_DN13906_c1_g1	A0A0B0NFX2_GOSAR/18-135	A0A0B0NFX2.1 PF04133.12;Vps55;	80.5	5.6e-44
TRINITY_DN13934_c0_g1	I3ISQ0_DANRE/1-124	I3ISQ0.1 PF00337.20;Gal-bind_lectin;	80.6	7.3e-39
TRINITY_DN13935_c0_g1	A0A0E0LV39_ORYPU/9-75	A0A0E0LV39.1 PF00403.24;HMA;	62.5	8.1e-09
TRINITY_DN13941_c0_g1	H2SGX7_TAKRU/1236-1318	H2SGX7.1 PF14619.4;SnAC;	90.9	1.3e-07
TRINITY_DN13952_c0_g1	M8AS69_TRIUA/29-161	M8AS69.1 PF00314.15;Thaumatin;	77	1.1e-28
TRINITY_DN13957_c0_g1	M5WP23_PRUPE/4-79	M5WP23.1 PF07297.10;DPM2;	88.2	4e-31
TRINITY_DN13982_c1_g1	E0VY40_PEDHC/159-224	E0VY40.1 PF00076.20;RRM_1;	39.4	6.6e-07
TRINITY_DN13984_c0_g1	I1LCH6_SOYBN/2-75	I1LCH6.1 PF02798.18;GST_N;	100	2.9e-36
TRINITY_DN13985_c0_g2	U5FKP6_POPTR/64-239	U5FKP6.1 PF01397.19;Terpene_synth;	49.2	5e-07
TRINITY_DN13996_c0_g2	C6TLC8_SOYBN/64-133	C6TLC8.1 PF00462.22;Glutaredoxin;	100	9.1e-30
TRINITY_DN14023_c0_g1	H2VE40_TAKRU/359-441	H2VE40.1 PF00017.22;SH2;	75	5.1e-23
TRINITY_DN14032_c0_g1	A0A022RFE4_ERYGU/7-64	A0A022RFE4.1 PF05347.13;Complex1_LYR;	79.3	1.5e-19
TRINITY_DN14058_c0_g2	V7BXP0_PHAVU/53-210	V7BXP0.1 PF01257.17;2Fe-2S_thioredx;	95.7	6.1e-48
TRINITY_DN14063_c0_g1	G1NTC8_MYOLU/1-96	G1NTC8.1 PF01199.16;Ribosomal_L34e;	100	6.8e-35
TRINITY_DN14063_c0_g2	G1NTC8_MYOLU/1-96	G1NTC8.1 PF01199.16;Ribosomal_L34e;	94.6	2.5e-44
TRINITY_DN14063_c0_g3	G1NTC8_MYOLU/1-96	G1NTC8.1 PF01199.16;Ribosomal_L34e;	95.8	5.4e-46
TRINITY_DN14070_c0_g1	W9SH74_9ROSA/9-79	W9SH74.1 PF00076.20;RRM_1;	91	1.9e-28
TRINITY_DN14076_c0_g1	A0A0K0EI73_STRER/28-250	A0A0K0EI73.1 PF00804.23;Syntaxin;	51.6	3.6e-08
TRINITY_DN14084_c0_g1	V7CRT5_PHAVU/1-232	V7CRT5.1 PF14290.4;DUF4370;	75	2.8e-25
TRINITY_DN14120_c0_g2	Q7ZVU7_DANRE/6-326	Q7ZVU7.1 PF01536.14;SAM_decarbox;	100	7.7e-42
TRINITY_DN14124_c0_g1	W5K234_ASTMX/143-237	W5K234.1 PF00031.19;Cystatin;	60	9.6e-29
TRINITY_DN14124_c0_g2	W5K234_ASTMX/25-118	W5K234.1 PF00031.19;Cystatin;	48.4	1.4e-10
TRINITY_DN14143_c0_g1	F7FJQ3_RAT/24-150	F7FJQ3.1 PF02221.13;E1_DerP2_DerF2;	95.8	1.1e-20
TRINITY_DN1414_c0_g1	A0A0E0PNE9_ORYRU/323-609	A0A0E0PNE9.1 PF00171.20;Aldedh;	98.7	3.3e-36
TRINITY_DN14152_c0_g1	A0A0R4IBR4_DANRE/88-189	A0A0R4IBR4.1 PF00989.23;PAS;	97.5	4.1e-37
TRINITY_DN14156_c0_g1	I3JJA0_ORENI/613-662	I3JJA0.1 PF03455.17;dDENN;	100	2.1e-07
TRINITY_DN14158_c0_g1	V7AVB3_PHAVU/42-284	V7AVB3.1 PF00141.21;peroxidase;	97.1	4.6e-32
TRINITY_DN14165_c0_g1	C6T5C8_SOYBN/11-104	C6T5C8.1 PF14368.4;LTP_2;	100	6.8e-50
TRINITY_DN14169_c0_g1	V4LSQ7_EUTSA/37-200	V4LSQ7.1 PF00160.19;Pro_isomerase;	61.3	6.5e-47
TRINITY_DN14181_c0_g1	C6SWW6_SOYBN/12-102	C6SWW6.1 PF02046.13;COX6A;	100	4.9e-49
TRINITY_DN14183_c0_g1	OST4B_ARATH/1-34	Q8L986.1 PF10215.7;Ost4;	88.2	4.8e-10
TRINITY_DN14196_c0_g3	X1WEC6_DANRE/37-86	X1WEC6.1 PF07645.13;EGF_CA;	62	1e-08
TRINITY_DN14199_c0_g1	V4RVW8_9ROSI/348-405	V4RVW8.1 PF04844.11;Ovate;	84.1	4.6e-13
TRINITY_DN141_c0_g1	M7YK95_TRIUA/1-373	M7YK95.1 PF01490.16;Aa_trans;	88.2	4.6e-29
TRINITY_DN14208_c0_g1	U9SNE1_RHIID/84-398	U9SNE1.1 PF00026.21;Asp;	91.6	1.6e-39
TRINITY_DN14211_c0_g1	Q503K1_DANRE/506-627	Q503K1.1 PF02469.20;Fasciclin;	100	5.8e-36
TRINITY_DN14218_c0_g1	G3NJM6_GASAC/17-81	G3NJM6.1 PF13499.4;EF-hand_7;	93.8	1.8e-25
TRINITY_DN14235_c0_g1	A5AH21_VITVI/13-115	A5AH21.1 PF02036.15;SCP2;	85.4	8.7e-46
TRINITY_DN14246_c0_g1	A0A093BQQ8_CHAPE/10-72	A0A093BQQ8.1 PF13499.4;EF-hand_7;	54	3.2e-12
TRINITY_DN14252_c0_g1	SODF_SOYBN/118-237	P28759.1 PF02777.16;Sod_Fe_C;	100	6.8e-17
TRINITY_DN14258_c1_g1	I1KH01_SOYBN/37-77	I1KH01.1 PF02845.14;CUE;	100	6e-06
TRINITY_DN1427_c0_g1	A0A0D9RLE7_CHLSB/11-78	A0A0D9RLE7.1 PF06522.9;B12D;	94.3	2.4e-24
TRINITY_DN14282_c0_g1	A0A061G3B3_THECC/28-141	A0A061G3B3.1 PF04398.10;DUF538;	79.7	1.8e-46
TRINITY_DN14286_c0_g1	Q7T2C8_DANRE/116-453	Q7T2C8.1 PF07992.12;Pyr_redox_2;	91.8	4.8e-32
TRINITY_DN14291_c0_g1	C6SVX3_SOYBN/4-157	C6SVX3.1 PF00582.24;Usp;	100	2.9e-52
TRINITY_DN14295_c0_g1	A0A0E0NHH2_ORYRU/90-643	A0A0E0NHH2.1 PF04551.12;GcpE;	100	5.3e-33
TRINITY_DN14312_c0_g1	V7AKN6_PHAVU/2-34	V7AKN6.1 PF05627.9;AvrRpt-cleavage;	71.9	7e-06
TRINITY_DN14325_c0_g1	A0A0D9V045_9ORYZ/3-42	A0A0D9V045.1 PF01779.15;Ribosomal_L29e;	100	5.5e-14
TRINITY_DN14335_c0_g3	F1QGU0_DANRE/24-125	F1QGU0.1 PF13344.4;Hydrolase_6;	93.4	1.5e-33
TRINITY_DN1433_c0_g2	S9X060_9CETA/78-191	S9X060.1 PF00828.17;Ribosomal_L27A;	73.2	4.6e-45
TRINITY_DN14342_c0_g1	BLCAP_BOVIN/1-65	P62954.1 PF06726.10;BC10;	98.5	2.4e-31
TRINITY_DN14344_c0_g1	U9TFR0_RHIID/579-692	U9TFR0.1 PF00175.19;NAD_binding_1;	98.3	3.4e-26
TRINITY_DN14383_c0_g1	U5FNG3_POPTR/5-447	U5FNG3.1 PF02458.13;Transferase;	58.7	6.8e-13
TRINITY_DN14388_c0_g1	V7ALF5_PHAVU/10-151	V7ALF5.1 PF02792.12;Mago_nashi;	100	1e-20
TRINITY_DN14396_c0_g1	K3YK24_SETIT/9-79	K3YK24.1 PF08523.8;MBF1;	93.2	4.3e-14
TRINITY_DN14402_c0_g1	F7CWZ0_XENTR/191-281	F7CWZ0.1 PF02167.13;Cytochrom_C1;	94.7	6e-38
TRINITY_DN14409_c0_g1	A0A061FB32_THECC/3-276	A0A061FB32.1 PF03059.14;NAS;	78.6	1.5e-25
TRINITY_DN14409_c0_g2	A0A061FB32_THECC/3-276	A0A061FB32.1 PF03059.14;NAS;	70.7	8.8e-28
TRINITY_DN14426_c0_g1	A0A0D9ZS91_9ORYZ/35-456	A0A0D9ZS91.1 PF01593.22;Amino_oxidase;	98.5	3.7e-34
TRINITY_DN14431_c0_g1	I1H399_BRADI/116-410	I1H399.1 PF07899.9;Frigida;	94.4	6.5e-29
TRINITY_DN14435_c0_g1	Q8AW82_DANRE/18-289	Q8AW82.1 PF00557.22;Peptidase_M24;	97.5	1.4e-37
TRINITY_DN14441_c1_g2	F6HGP3_VITVI/133-498	F6HGP3.1 PF00067.20;p450;	66.1	1.8e-14
TRINITY_DN14450_c0_g1	U5G2P3_POPTR/472-529	U5G2P3.1 PF08031.10;BBE;	69.8	5.6e-11
TRINITY_DN14485_c0_g2	A0A0R4IRJ0_DANRE/22-163	A0A0R4IRJ0.1 PF01284.21;MARVEL;	76.3	8e-19
TRINITY_DN14493_c0_g1	G3PTH4_GASAC/607-912	G3PTH4.1 PF00632.23;HECT;	96.6	9.4e-43
TRINITY_DN14497_c0_g1	NDK1_SOYBN/3-136	Q39839.1 PF00334.17;NDK;	98.5	1.4e-71
TRINITY_DN14501_c0_g1	I1LQR1_SOYBN/494-651	I1LQR1.1 PF05536.9;Neurochondrin;	98.8	3.9e-38
TRINITY_DN14504_c0_g1	A0A0J8BM96_BETVU/323-450	A0A0J8BM96.1 PF10409.7;PTEN_C2;	86.5	2.1e-11
TRINITY_DN14520_c0_g1	K7MV34_SOYBN/19-64	K7MV34.1 PF00646.31;F-box;	64.4	1.4e-08
TRINITY_DN14534_c0_g2	Q6H5Y1_ORYSJ/675-958	Q6H5Y1.1 PF00069.23;Pkinase;	100	7.2e-33
TRINITY_DN1454_c0_g1	J3MJ33_ORYBR/8-112	J3MJ33.1 PF00085.18;Thioredoxin;	93.3	7.8e-51
TRINITY_DN14557_c0_g2	A0A0D9ZVZ8_9ORYZ/768-985	A0A0D9ZVZ8.1 PF07774.11;DUF1620;	98.8	2.1e-39
TRINITY_DN14564_c0_g1	A0A0D2T560_GOSRA/64-145	A0A0D2T560.1 PF08561.8;Ribosomal_L37;	74.4	1.7e-29
TRINITY_DN14570_c0_g1	A0A0D2V906_GOSRA/58-154	A0A0D2V906.1 PF02298.15;Cu_bind_like;	72.9	5e-40
TRINITY_DN14571_c0_g1	H7C381_HUMAN/4-159	H7C381.1 PF13385.4;Laminin_G_3;	77.1	7.4e-13
TRINITY_DN14573_c0_g1	B9H3A9_POPTR/26-114	B9H3A9.2 PF00234.20;Tryp_alpha_amyl;	68.2	6.9e-27
TRINITY_DN14581_c0_g2	A0A0D2S377_GOSRA/130-580	A0A0D2S377.1 PF00082.20;Peptidase_S8;	64	1.2e-20
TRINITY_DN14598_c0_g1	F1RDH8_DANRE/71-608	F1RDH8.1 PF06046.11;Sec6;	59.4	6.8e-20
TRINITY_DN14626_c1_g1	C6TCC9_SOYBN/8-70	C6TCC9.1 PF00280.16;potato_inhibit;	90.5	9e-25
TRINITY_DN14639_c0_g1	G1K2U4_DANRE/453-570	G1K2U4.1 PF13306.4;LRR_5;	82.5	1.8e-11
TRINITY_DN14641_c0_g1	W5L5M0_ASTMX/315-554	W5L5M0.1 PF00089.24;Trypsin;	59.6	1.4e-26
TRINITY_DN14641_c0_g2	E7FC55_DANRE/253-489	E7FC55.1 PF00089.24;Trypsin;	70.1	2.9e-23
TRINITY_DN1464_c0_g1	I1R787_ORYGL/13-135	I1R787.1 PF02996.15;Prefoldin;	100	2.8e-19
TRINITY_DN14660_c0_g1	A0A015IF75_9GLOM/96-237	A0A015IF75.1 PF01565.21;FAD_binding_4;	82.5	1.1e-10
TRINITY_DN14670_c0_g1	Q8HLX2_ORYLA/95-214	Q8HLX2.1 PF00116.18;COX2;	87.5	2.9e-56
TRINITY_DN14670_c0_g2	Q8HLX2_ORYLA/95-214	Q8HLX2.1 PF00116.18;COX2;	86.7	1.6e-56
TRINITY_DN14670_c0_g3	Q8HLX2_ORYLA/95-214	Q8HLX2.1 PF00116.18;COX2;	91.7	6.3e-59
TRINITY_DN14670_c0_g4	Q8WBA9_CRIGR/95-214	Q8WBA9.1 PF00116.18;COX2;	88.7	2.3e-49
TRINITY_DN14670_c0_g5	Q8WBA9_CRIGR/95-214	Q8WBA9.1 PF00116.18;COX2;	85.7	9.8e-39
TRINITY_DN14674_c0_g2	M0V144_HORVD/58-199	M0V144.1 PF14223.4;Retrotran_gag_2;	69.8	3.5e-13
TRINITY_DN14680_c0_g1	A0A067QB70_9HOMO/28-104	A0A067QB70.1 PF01253.20;SUI1;	93.5	1.5e-34
TRINITY_DN14681_c0_g3	A0A0D9YUY8_9ORYZ/207-500	A0A0D9YUY8.1 PF00069.23;Pkinase;	100	1e-108
TRINITY_DN14682_c0_g1	A0A0R4ICP8_DANRE/49-247	A0A0R4ICP8.1 PF00554.20;RHD_DNA_bind;	93.8	8.4e-38
TRINITY_DN14685_c0_g2	M1BNS9_SOLTU/185-345	M1BNS9.1 PF00078.25;RVT_1;	81.2	1.5e-27
TRINITY_DN14688_c0_g1	G3N447_GASAC/222-295	G3N447.1 PF00617.17;RasGEF;	89.6	1.8e-17
TRINITY_DN14694_c0_g1	G7PLJ8_MACFA/35-76	G7PLJ8.1 PF00010.24;HLH;	97.6	4.5e-15
TRINITY_DN14708_c0_g1	M3ZQW0_XIPMA/1171-1274	M3ZQW0.1 PF00435.19;Spectrin;	90.2	2.6e-21
TRINITY_DN14722_c0_g1	I1NHH8_SOYBN/153-536	I1NHH8.1 PF01490.16;Aa_trans;	98.7	3.5e-33
TRINITY_DN14725_c0_g1	A0A0D2MMA1_GOSRA/198-384	A0A0D2MMA1.1 PF10018.7;Med4;	70.1	1.3e-65
TRINITY_DN14726_c1_g1	K7M8Q6_SOYBN/330-386	K7M8Q6.1 PF03822.12;NAF;	100	2.8e-18
TRINITY_DN14728_c0_g1	G1RWQ5_NOMLE/8-142	G1RWQ5.1 PF00578.19;AhpC-TSA;	96.3	1.7e-72
TRINITY_DN14732_c0_g1	G3NYQ9_GASAC/8-191	G3NYQ9.1 PF01214.16;CK_II_beta;	100	2.1e-40
TRINITY_DN14733_c0_g1	F6H1Y7_VITVI/532-884	F6H1Y7.1 PF00060.24;Lig_chan;	58.1	2e-06
TRINITY_DN14735_c0_g1	A0A067G7T2_CITSI/144-609	A0A067G7T2.1 PF00082.20;Peptidase_S8;	80	1.7e-219
TRINITY_DN14738_c0_g1	A0A067KYQ4_JATCU/9-81	A0A067KYQ4.1 PF00173.26;Cyt-b5;	80.8	2e-29
TRINITY_DN14745_c0_g1	J3L257_ORYBR/499-628	J3L257.1 PF03469.12;XH;	92.7	9.3e-23
TRINITY_DN14773_c0_g1	Q70MR6_SOYBN/65-296	Q70MR6.1 PF02784.14;Orn_Arg_deC_N;	97.1	3e-12
TRINITY_DN14777_c0_g1	F6WVD1_HORSE/7-68	F6WVD1.1 PF01200.16;Ribosomal_S28e;	96.8	9.3e-26
TRINITY_DN14777_c0_g2	F6WVD1_HORSE/7-68	F6WVD1.1 PF01200.16;Ribosomal_S28e;	96.8	1.2e-25
TRINITY_DN14777_c0_g3	F6WVD1_HORSE/7-68	F6WVD1.1 PF01200.16;Ribosomal_S28e;	96.7	4.2e-25
TRINITY_DN14785_c0_g2	A0A087X6V4_POEFO/44-537	A0A087X6V4.2 PF00118.22;Cpn60_TCP1;	94	4.5e-29
TRINITY_DN14785_c0_g3	A0A087X6V4_POEFO/44-537	A0A087X6V4.2 PF00118.22;Cpn60_TCP1;	100	3.4e-33
TRINITY_DN14787_c0_g1	W5LIX9_ASTMX/303-385	W5LIX9.1 PF02020.16;W2;	91.4	5.5e-28
TRINITY_DN14787_c0_g2	M3XTE1_MUSPF/6-128	M3XTE1.1 PF01873.15;eIF-5_eIF-2B;	92.6	2.7e-25
TRINITY_DN14817_c0_g1	A0A0D2S7C8_GOSRA/11-92	A0A0D2S7C8.1 PF01198.17;Ribosomal_L31e;	92.7	7.3e-36
TRINITY_DN14819_c0_g1	K4B8R0_SOLLC/356-417	K4B8R0.1 PF08276.9;PAN_2;	64.8	1.8e-13
TRINITY_DN14826_c0_g1	H2L9C2_ORYLA/144-388	H2L9C2.1 PF00362.16;Integrin_beta;	88.4	6.1e-13
TRINITY_DN14850_c0_g2	B9HKM3_POPTR/23-59	B9HKM3.1 PF02861.18;Clp_N;	89.2	5.7e-09
TRINITY_DN14871_c0_g1	C6SZ02_SOYBN/27-80	C6SZ02.1 PF04570.12;zf-FLZ;	97.8	1.6e-20
TRINITY_DN14881_c0_g1	F7EJE8_XENTR/1201-1702	F7EJE8.1 PF01576.17;Myosin_tail_1;	46.6	1.7e-15
TRINITY_DN14881_c0_g2	T1GTH2_MEGSC/262-353	T1GTH2.1 PF01576.17;Myosin_tail_1;	50	1.8e-07
TRINITY_DN14886_c0_g2	A0A015KW52_9GLOM/4-255	A0A015KW52.1 PF00370.19;FGGY_N;	86.7	2.9e-29
TRINITY_DN14896_c0_g1	B7QMT2_IXOSC/34-75	B7QMT2.1 PF00832.18;Ribosomal_L39;	87.8	4.1e-13
TRINITY_DN14899_c0_g2	M5WS86_PRUPE/671-701	M5WS86.1 PF01535.18;PPR;	80.6	2.8e-07
TRINITY_DN14901_c0_g1	I1Q738_ORYGL/9-137	I1Q738.1 PF06110.9;DUF953;	100	2.7e-24
TRINITY_DN14907_c0_g2	A0A0D2ZYZ2_BRAOL/1-134	A0A0D2ZYZ2.1 PF14223.4;Retrotran_gag_2;	60.6	1.4e-15
TRINITY_DN14915_c0_g1	Q6ENK8_ORYSJ/4-56	Q6ENK8.1 PF01805.18;Surp;	100	2.6e-22
TRINITY_DN14919_c0_g1	I1P9B9_ORYGL/1-129	I1P9B9.1 PF05529.10;Bap31;	81	3.4e-24
TRINITY_DN14925_c0_g1	U9V871_RHIID/5-67	U9V871.1 PF00076.20;RRM_1;	100	1e-28
TRINITY_DN14931_c0_g1	K4DC42_SOLLC/11-260	K4DC42.1 PF07727.12;RVT_2;	67	1.3e-26
TRINITY_DN14931_c0_g4	W9R7S4_9ROSA/100-403	W9R7S4.1 PF01869.18;BcrAD_BadFG;	42.1	6.9e-09
TRINITY_DN14934_c0_g1	I1HIR0_BRADI/7-102	I1HIR0.1 PF01158.16;Ribosomal_L36e;	95.8	3.8e-42
TRINITY_DN14941_c0_g1	F6HBP1_VITVI/33-214	F6HBP1.1 PF00722.19;Glyco_hydro_16;	87.4	8.5e-96
TRINITY_DN14945_c0_g2	W5LMY4_ASTMX/409-698	W5LMY4.1 PF13949.4;ALIX_LYPXL_bnd;	93.1	5.4e-20
TRINITY_DN14952_c0_g1	U5GSP7_POPTR/6-55	U5GSP7.1 PF00253.19;Ribosomal_S14;	95.9	3.2e-24
TRINITY_DN14957_c0_g1	I1KV08_SOYBN/238-423	I1KV08.1 PF05193.19;Peptidase_M16_C;	97	3.3e-29
TRINITY_DN14963_c0_g1	I1K996_SOYBN/117-179	I1K996.1 PF00076.20;RRM_1;	94.8	2e-24
TRINITY_DN14986_c0_g1	F1QX16_DANRE/75-235	F1QX16.2 PF01553.19;Acyltransferase;	97.4	2.7e-41
TRINITY_DN14988_c0_g1	RL39_HUMAN/9-50	P62891.2 PF00832.18;Ribosomal_L39;	100	1.8e-16
TRINITY_DN14991_c0_g2	F7FS47_MACMU/1700-1805	F7FS47.1 PF00435.19;Spectrin;	88.5	5.3e-19
TRINITY_DN15005_c0_g1	Q5Z4P9_ORYSJ/1-102	Q5Z4P9.1 PF07172.9;GRP;	96.5	1.4e-21
TRINITY_DN15010_c0_g1	M3ZUK4_XIPMA/5-153	M3ZUK4.1 PF00056.21;Ldh_1_N;	95	2.9e-46
TRINITY_DN15020_c0_g1	L8HFT5_ACACA/271-321	L8HFT5.1 PF02272.17;DHHA1;	62.2	4.3e-08
TRINITY_DN15038_c0_g1	V7BIZ6_PHAVU/686-732	V7BIZ6.1 PF06203.12;CCT;	87.2	5.4e-13
TRINITY_DN15040_c0_g1	B8A4S6_DANRE/134-184	B8A4S6.1 PF00415.16;RCC1;	72.5	2.9e-14
TRINITY_DN15048_c0_g1	W1P2Q3_AMBTC/16-73	W1P2Q3.1 PF00403.24;HMA;	80.4	1.7e-17
TRINITY_DN1504_c0_g1	NUG2_ORYSI/51-177	A2XGQ1.1 PF08153.10;NGP1NT;	100	1e-22
TRINITY_DN15063_c0_g1	A0A0E0BFX9_9ORYZ/817-944	A0A0E0BFX9.1 PF14806.4;Coatomer_b_Cpla;	95.6	6.4e-31
TRINITY_DN15063_c0_g2	W5CNB1_WHEAT/237-376	W5CNB1.1 PF07718.10;Coatamer_beta_C;	96.2	2.1e-36
TRINITY_DN15063_c0_g3	W5CNB1_WHEAT/237-376	W5CNB1.1 PF07718.10;Coatamer_beta_C;	93	5.2e-31
TRINITY_DN15064_c0_g1	A0A0D2TJG4_GOSRA/8-165	A0A0D2TJG4.1 PF00582.24;Usp;	80.3	5e-69
TRINITY_DN15079_c0_g1	A0A0R4IJT8_DANRE/39-529	A0A0R4IJT8.1 PF00118.22;Cpn60_TCP1;	100	5e-34
TRINITY_DN15083_c0_g1	K3YIU2_SETIT/25-230	K3YIU2.1 PF01926.21;MMR_HSR1;	81.3	3.7e-34
TRINITY_DN15089_c0_g1	F6HFB5_VITVI/32-104	F6HFB5.1 PF04564.13;U-box;	86.1	7.1e-31
TRINITY_DN15091_c0_g1	I1NCP5_SOYBN/9-81	I1NCP5.1 PF00173.26;Cyt-b5;	100	8.8e-29
TRINITY_DN15099_c0_g1	M0VP35_HORVD/79-132	M0VP35.1 PF00584.18;SecE;	96.3	4.4e-21
TRINITY_DN15100_c0_g1	I1M665_SOYBN/232-362	I1M665.2 PF02469.20;Fasciclin;	99	2.9e-46
TRINITY_DN15105_c1_g1	Q802C7_DANRE/112-177	Q802C7.1 PF00076.20;RRM_1;	100	2.4e-32
TRINITY_DN15114_c0_g1	B9RR46_RICCO/16-142	B9RR46.1 PF02519.12;Auxin_inducible;	75	3.8e-47
TRINITY_DN15140_c0_g1	A0A090LND7_STRRB/279-790	A0A090LND7.1 PF01055.24;Glyco_hydro_31;	66.7	9.8e-16
TRINITY_DN15143_c0_g1	A5BPK1_VITVI/29-115	A5BPK1.1 PF01190.15;Pollen_Ole_e_I;	72.3	3.5e-20
TRINITY_DN15146_c1_g1	W9QD67_9ROSA/1-85	W9QD67.1 PF03732.15;Retrotrans_gag;	55.9	5.4e-17
TRINITY_DN15147_c0_g1	F6HQ12_VITVI/13-75	F6HQ12.1 PF00462.22;Glutaredoxin;	82.8	9.6e-22
TRINITY_DN15162_c0_g5	J9M4D0_ACYPI/169-267	J9M4D0.2 PF07727.12;RVT_2;	48.9	7.9e-07
TRINITY_DN15162_c0_g6	I1GYV5_BRADI/706-951	I1GYV5.1 PF07727.12;RVT_2;	60.2	8.1e-23
TRINITY_DN15163_c0_g1	A0A0C4BHM0_WHEAT/159-217	A0A0C4BHM0.1 PF13855.4;LRR_8;	76.4	3.6e-18
TRINITY_DN15163_c0_g2	E0CTG0_VITVI/56-95	E0CTG0.1 PF08263.10;LRRNT_2;	86.2	4.3e-08
TRINITY_DN15180_c0_g1	A2XCX7_ORYSI/259-592	A2XCX7.1 PF03372.21;Exo_endo_phos;	94.2	5.1e-41
TRINITY_DN15181_c0_g1	D7TJ80_VITVI/1-106	D7TJ80.1 PF08661.9;Rep_fac-A_3;	76.4	2.5e-39
TRINITY_DN15188_c0_g1	A0A059BF36_EUCGR/53-186	A0A059BF36.1 PF03188.14;Cytochrom_B561;	66.4	1.7e-46
TRINITY_DN15191_c0_g1	M4D0E6_BRARP/17-68	M4D0E6.1 PF04588.11;HIG_1_N;	92.3	5.7e-20
TRINITY_DN15195_c0_g1	I1KP14_SOYBN/42-151	I1KP14.1 PF00565.15;SNase;	91.4	7.2e-24
TRINITY_DN15196_c0_g1	A0A059CU33_EUCGR/80-124	A0A059CU33.1 PF12023.6;DUF3511;	88.9	1.3e-15
TRINITY_DN15197_c0_g2	A0A022PZ16_ERYGU/163-264	A0A022PZ16.1 PF03171.18;2OG-FeII_Oxy;	73.1	5.1e-16
TRINITY_DN15203_c0_g1	A0A061EYI9_THECC/24-179	A0A061EYI9.1 PF06521.9;PAR1;	63.1	1.2e-46
TRINITY_DN15207_c0_g1	B9I223_POPTR/9-165	B9I223.2 PF14009.4;DUF4228;	53.1	6.8e-07
TRINITY_DN15208_c0_g1	A0A0A0LRL9_CUCSA/134-197	A0A0A0LRL9.1 PF13812.4;PPR_3;	59.4	9.8e-15
TRINITY_DN15213_c0_g2	EF106_ARATH/108-160	Q9LY05.1 PF00847.18;AP2;	78.8	1.3e-18
TRINITY_DN15223_c0_g1	G1R9I1_NOMLE/18-85	G1R9I1.1 PF00076.20;RRM_1;	97.1	1.9e-33
TRINITY_DN15224_c1_g1	F6XND6_MACMU/1-106	F6XND6.1 PF01283.17;Ribosomal_S26e;	93.8	1.5e-44
TRINITY_DN15224_c1_g2	F6XND6_MACMU/1-106	F6XND6.1 PF01283.17;Ribosomal_S26e;	94.1	1.2e-47
TRINITY_DN15224_c1_g3	G1TTE5_RABIT/1-108	G1TTE5.1 PF01283.17;Ribosomal_S26e;	93.4	2.3e-49
TRINITY_DN1522_c0_g1	I1MUS3_SOYBN/14-200	I1MUS3.1 PF04321.15;RmlD_sub_bind;	100	6.4e-26
TRINITY_DN15237_c0_g1	K4D4J5_SOLLC/31-184	K4D4J5.1 PF04043.13;PMEI;	64.9	1.8e-48
TRINITY_DN15237_c0_g2	K4D4J5_SOLLC/31-184	K4D4J5.1 PF04043.13;PMEI;	64.9	1.9e-50
TRINITY_DN1523_c0_g1	F6I7N4_VITVI/10-129	F6I7N4.1 PF00504.19;Chloroa_b-bind;	87.9	3.2e-24
TRINITY_DN15249_c0_g3	A0A0E0Q5F9_ORYRU/91-211	A0A0E0Q5F9.1 PF02353.18;CMAS;	100	3.6e-51
TRINITY_DN15254_c0_g1	Q9DDU5_DANRE/98-195	Q9DDU5.1 PF14497.4;GST_C_3;	100	2.6e-14
TRINITY_DN15257_c0_g1	Q5U381_DANRE/1-98	Q5U381.1 PF01101.16;HMG14_17;	94.5	2.3e-08
TRINITY_DN15260_c0_g1	A0A059CHL9_EUCGR/63-147	A0A059CHL9.1 PF14547.4;Hydrophob_seed;	81.2	7.7e-35
TRINITY_DN15264_c0_g1	M0SD68_MUSAM/3-68	M0SD68.1 PF01246.18;Ribosomal_L24e;	95.5	1.4e-30
TRINITY_DN15269_c0_g1	C6T343_SOYBN/2-68	C6T343.1 PF05493.11;ATP_synt_H;	80.6	1.1e-24
TRINITY_DN15271_c0_g1	A0A0D9X235_9ORYZ/25-172	A0A0D9X235.1 PF04051.14;TRAPP;	100	2.8e-48
TRINITY_DN15274_c0_g2	M4ABR7_XIPMA/39-245	M4ABR7.1 PF00009.25;GTP_EFTU;	100	4.2e-22
TRINITY_DN15274_c0_g3	W5Q6E7_SHEEP/39-245	W5Q6E7.1 PF00009.25;GTP_EFTU;	98.8	7.3e-37
TRINITY_DN15280_c0_g2	C6SXF9_SOYBN/16-39	C6SXF9.1 PF01754.14;zf-A20;	100	5.3e-07
TRINITY_DN15285_c0_g1	Q6PC01_DANRE/3-72	Q6PC01.1 PF00240.21;ubiquitin;	68.6	3.3e-21
TRINITY_DN15300_c0_g3	A0A059CPM7_EUCGR/339-445	A0A059CPM7.1 PF00856.26;SET;	85.3	1.2e-10
TRINITY_DN15307_c0_g1	A0A0N4UKA5_DRAME/6-55	A0A0N4UKA5.1 PF01679.15;Pmp3;	76.5	1.6e-14
TRINITY_DN15315_c0_g1	Q5SPJ1_DANRE/64-427	Q5SPJ1.1 PF00079.18;Serpin;	48.7	1.6e-21
TRINITY_DN15315_c0_g2	W5KQ73_ASTMX/1-224	W5KQ73.1 PF00079.18;Serpin;	58.8	2.4e-21
TRINITY_DN15315_c0_g3	I3IY14_ORENI/43-405	I3IY14.1 PF00079.18;Serpin;	63	2.5e-13
TRINITY_DN15323_c0_g1	U9T0D8_RHIID/492-602	U9T0D8.1 PF00271.29;Helicase_C;	87.9	3.7e-23
TRINITY_DN15325_c0_g1	Q3TA96_MOUSE/106-406	Q3TA96.1 PF01299.15;Lamp;	91.7	3.4e-37
TRINITY_DN15326_c0_g1	A0A096PRI2_MAIZE/16-75	A0A096PRI2.1 PF00076.20;RRM_1;	100	3.2e-22
TRINITY_DN15334_c0_g1	A0A0D2N2G9_GOSRA/4-73	A0A0D2N2G9.1 PF00240.21;ubiquitin;	97.1	5.2e-33
TRINITY_DN15339_c0_g1	F6VPL0_MACMU/3-42	F6VPL0.1 PF01779.15;Ribosomal_L29e;	92.5	1.4e-11
TRINITY_DN15339_c0_g2	F6VPL0_MACMU/3-42	F6VPL0.1 PF01779.15;Ribosomal_L29e;	97.5	1e-14
TRINITY_DN15339_c0_g3	L5K2L6_PTEAL/7-264	L5K2L6.1 PF01180.19;DHO_dh;	83.6	3e-15
TRINITY_DN15339_c0_g4	U3K2Q6_FICAL/3-42	U3K2Q6.1 PF01779.15;Ribosomal_L29e;	92.5	3.1e-13
TRINITY_DN15345_c0_g1	A0A0B0MJ38_GOSAR/9-443	A0A0B0MJ38.1 PF04997.10;RNA_pol_Rpb1_1;	56.1	2.5e-21
TRINITY_DN15349_c0_g1	D7SIR5_VITVI/7-112	D7SIR5.1 PF10280.7;Med11;	84	5.3e-48
TRINITY_DN15350_c0_g1	A0A061GJ25_THECC/4-233	A0A061GJ25.1 PF06888.10;Put_Phosphatase;	69.1	4.2e-91
TRINITY_DN15351_c0_g1	Q6P937_DANRE/1-234	Q6P937.1 PF01086.15;Clathrin_lg_ch;	100	9.3e-58
TRINITY_DN15354_c0_g1	R4G9A5_ANOCA/12-65	R4G9A5.1 PF00584.18;SecE;	100	5.8e-22
TRINITY_DN15357_c0_g1	B9SFJ0_RICCO/8-105	B9SFJ0.1 PF14368.4;LTP_2;	70.1	3.4e-33
TRINITY_DN15358_c0_g1	B0S6K5_DANRE/344-426	B0S6K5.1 PF00041.19;fn3;	100	9.4e-41
TRINITY_DN15363_c0_g2	A9TK03_PHYPA/460-553	A9TK03.1 PF14578.4;GTP_EFTU_D4;	76.9	1.8e-23
TRINITY_DN15372_c0_g2	F1R501_DANRE/51-464	F1R501.1 PF01403.17;Sema;	89.9	9.7e-39
TRINITY_DN15374_c0_g1	S8C0T2_9LAMI/264-329	S8C0T2.1 PF13432.4;TPR_16;	68.2	1.6e-19
TRINITY_DN15394_c0_g1	A0A0N4T1Z5_BRUPA/28-137	A0A0N4T1Z5.1 PF00270.27;DEAD;	72.2	1.4e-06
TRINITY_DN15395_c0_g1	H3C9M2_TETNG/8-103	H3C9M2.1 PF07654.13;C1-set;	40.9	2.9e-07
TRINITY_DN15396_c0_g1	W5LMU7_ASTMX/114-379	W5LMU7.1 PF07766.11;LETM1;	100	4.8e-22
TRINITY_DN15398_c0_g1	F6HRK8_VITVI/37-118	F6HRK8.1 PF16845.3;SQAPI;	49.3	9.5e-13
TRINITY_DN15399_c0_g1	R0I378_9BRAS/419-532	R0I378.1 PF02689.12;Herpes_Helicase;	55.3	6.6e-28
TRINITY_DN15406_c0_g1	K4B3E2_SOLLC/52-213	K4B3E2.1 PF13847.4;Methyltransf_31;	79.6	2.4e-73
TRINITY_DN15409_c0_g1	A0A0D3HD77_9ORYZ/93-296	A0A0D3HD77.1 PF00155.19;Aminotran_1_2;	100	9.4e-33
TRINITY_DN15426_c0_g1	A0A061DMK6_THECC/334-572	A0A061DMK6.1 PF00557.22;Peptidase_M24;	92	3.9e-21
TRINITY_DN15428_c0_g4	S7RXD2_GLOTA/1-82	S7RXD2.1 PF02298.15;Cu_bind_like;	50.7	1.3e-11
TRINITY_DN15429_c0_g1	I3MWD9_ICTTR/201-270	I3MWD9.1 PF00076.20;RRM_1;	94.1	1.6e-31
TRINITY_DN15436_c0_g1	NDUBA_HUMAN/36-162	O96000.3 PF10249.7;NDUFB10;	100	3.7e-31
TRINITY_DN15440_c0_g1	C6SWP3_SOYBN/100-134	C6SWP3.1 PF06747.11;CHCH;	100	6.6e-14
TRINITY_DN15446_c0_g1	H2SI87_TAKRU/5-69	H2SI87.1 PF08156.11;NOP5NT;	95.3	2.2e-24
TRINITY_DN15449_c0_g2	J3M792_ORYBR/215-365	J3M792.1 PF17177.2;PPR_long;	51.3	4.5e-15
TRINITY_DN15458_c0_g2	W5MP64_LEPOC/157-433	W5MP64.1 PF00928.19;Adap_comp_sub;	100	5.2e-32
TRINITY_DN15471_c0_g1	F7EG83_XENTR/1446-1535	F7EG83.1 PF00439.23;Bromodomain;	100	2.9e-06
TRINITY_DN15484_c0_g1	G3UZL6_MOUSE/7-95	G3UZL6.1 PF00179.24;UQ_con;	100	4.1e-33
TRINITY_DN15485_c0_g1	A0A072V298_MEDTR/109-187	A0A072V298.1 PF01472.18;PUA;	54.7	5.3e-28
TRINITY_DN15486_c0_g2	G3Q882_GASAC/1-486	G3Q882.1 PF00118.22;Cpn60_TCP1;	92.9	3.1e-28
TRINITY_DN15490_c0_g1	K7KFD5_SOYBN/39-480	K7KFD5.1 PF00067.20;p450;	100	4.6e-42
TRINITY_DN15491_c1_g1	W5ERS2_WHEAT/204-384	W5ERS2.1 PF16269.3;DUF4922;	86.1	6e-31
TRINITY_DN15491_c1_g2	Q05AP0_DANRE/87-274	Q05AP0.1 PF01400.22;Astacin;	76.5	2.8e-84
TRINITY_DN15497_c0_g1	G7PZ32_MACFA/169-238	G7PZ32.1 PF00076.20;RRM_1;	94.1	2.2e-10
TRINITY_DN15501_c0_g2	A0A067K9D6_JATCU/5-189	A0A067K9D6.1 PF00227.24;Proteasome;	92.8	5.5e-29
TRINITY_DN15502_c0_g3	F4WMK0_ACREC/80-171	F4WMK0.1 PF00400.30;WD40;	50	6.6e-07
TRINITY_DN15505_c0_g1	U1NWC4_ASCSU/32-141	U1NWC4.1 PF02100.15;ODC_AZ;	48.6	1.3e-12
TRINITY_DN15509_c0_g1	Q6NWK1_DANRE/17-284	Q6NWK1.1 PF01267.15;F-actin_cap_A;	100	1.5e-42
TRINITY_DN15526_c0_g1	A0A0B0MZ73_GOSAR/1-96	A0A0B0MZ73.1 PF01199.16;Ribosomal_L34e;	95.8	3e-44
TRINITY_DN15533_c0_g2	K7MRH9_SOYBN/93-597	K7MRH9.1 PF03141.14;Methyltransf_29;	95.7	6.9e-36
TRINITY_DN15543_c0_g1	A0A087YEA2_POEFO/642-737	A0A087YEA2.2 PF08152.10;GUCT;	77.6	2.9e-28
TRINITY_DN15548_c0_g1	B7QMT2_IXOSC/34-75	B7QMT2.1 PF00832.18;Ribosomal_L39;	87.8	3.5e-13
TRINITY_DN15549_c0_g1	B7QMV1_IXOSC/17-349	B7QMV1.1 PF00009.25;GTP_EFTU;	83.9	2.7e-73
TRINITY_DN15549_c0_g2	H2V9Q6_TAKRU/501-569	H2V9Q6.1 PF14492.4;EFG_II;	92.8	1.8e-30
TRINITY_DN15556_c0_g1	W1NM85_AMBTC/135-203	W1NM85.1 PF00298.17;Ribosomal_L11;	89.9	9e-27
TRINITY_DN15563_c0_g1	A0A0P7XU10_9TELE/1-149	A0A0P7XU10.1 PF00063.19;Myosin_head;	92.7	3.9e-12
TRINITY_DN15566_c0_g3	W9QKG1_9ROSA/1-38	W9QKG1.1 PF00444.16;Ribosomal_L36;	100	7.5e-14
TRINITY_DN15576_c0_g2	F7EX47_CALJA/55-653	F7EX47.1 PF00012.18;HSP70;	91.4	9.7e-34
TRINITY_DN15577_c0_g1	A0A0D9YL13_9ORYZ/224-340	A0A0D9YL13.1 PF00175.19;NAD_binding_1;	100	5.9e-27
TRINITY_DN15586_c0_g1	I1KH71_SOYBN/314-547	I1KH71.1 PF00198.21;2-oxoacid_dh;	96.4	3e-38
TRINITY_DN15586_c0_g3	I1KH71_SOYBN/314-547	I1KH71.1 PF00198.21;2-oxoacid_dh;	98.6	3.4e-35
TRINITY_DN15589_c0_g1	S38A2_DANRE/72-488	Q5SPB1.1 PF01490.16;Aa_trans;	86	6.3e-15
TRINITY_DN15589_c0_g4	S38A2_DANRE/72-488	Q5SPB1.1 PF01490.16;Aa_trans;	95.7	6.5e-31
TRINITY_DN15602_c0_g1	A2YAD3_ORYSI/451-527	A2YAD3.1 PF01713.19;Smr;	100	5.3e-32
TRINITY_DN15605_c0_g1	M0T640_MUSAM/52-548	M0T640.1 PF02990.14;EMP70;	91.8	1.3e-32
TRINITY_DN15606_c0_g1	F1QXV8_DANRE/9-406	F1QXV8.1 PF00162.17;PGK;	98.5	5.4e-30
TRINITY_DN15607_c0_g1	A9JR96_DANRE/456-560	A9JR96.1 PF04003.10;Utp12;	91.1	5.9e-14
TRINITY_DN15610_c0_g2	G3NW14_GASAC/180-469	G3NW14.1 PF00393.17;6PGD;	91.2	3.5e-49
TRINITY_DN15611_c0_g3	G3NHJ6_GASAC/9-221	G3NHJ6.1 PF00335.18;Tetraspannin;	62.7	9.2e-16
TRINITY_DN15612_c0_g1	F6H2I9_VITVI/67-327	F6H2I9.1 PF01370.19;Epimerase;	70.5	1.8e-102
TRINITY_DN15617_c0_g1	U5GYA5_USTV1/136-457	U5GYA5.1 PF00082.20;Peptidase_S8;	62.2	2.2e-26
TRINITY_DN15620_c0_g1	I1MJP8_SOYBN/10-87	I1MJP8.1 PF14569.4;zf-UDP;	97.8	9.2e-20
TRINITY_DN15636_c1_g1	W5KTD6_ASTMX/1003-1238	W5KTD6.1 PF07678.12;A2M_comp;	74.1	6.7e-25
TRINITY_DN15636_c1_g2	A0A087XIS1_POEFO/997-1231	A0A087XIS1.2 PF07678.12;A2M_comp;	70.4	2.8e-27
TRINITY_DN15636_c1_g3	G3NMY8_GASAC/1113-1201	G3NMY8.1 PF07677.12;A2M_recep;	55.4	1.3e-20
TRINITY_DN15639_c0_g1	G3NIT1_GASAC/22-112	G3NIT1.1 PF00428.17;Ribosomal_60s;	93.2	9e-16
TRINITY_DN15639_c0_g2	A7E2K4_DANRE/17-113	A7E2K4.1 PF00428.17;Ribosomal_60s;	100	9.7e-19
TRINITY_DN15639_c0_g3	A7E2K4_DANRE/17-113	A7E2K4.1 PF00428.17;Ribosomal_60s;	90.2	2.2e-16
TRINITY_DN15643_c0_g1	A0A067JWM5_JATCU/57-125	A0A067JWM5.1 PF02672.13;CP12;	81.2	2.6e-25
TRINITY_DN15644_c0_g2	Q6DRF3_DANRE/30-222	Q6DRF3.1 PF00227.24;Proteasome;	97	8.4e-31
TRINITY_DN15645_c0_g1	A0A0N5A4P6_PARTI/31-110	A0A0N5A4P6.1 PF01060.21;TTR-52;	75	5e-11
TRINITY_DN15657_c0_g1	A0A022PW35_ERYGU/2-155	A0A022PW35.1 PF00407.17;Bet_v_1;	60	3.4e-23
TRINITY_DN15657_c0_g2	M0ZV10_SOLTU/1-154	M0ZV10.1 PF00407.17;Bet_v_1;	62.7	2.6e-09
TRINITY_DN15659_c0_g1	A0A0N4T1Z5_BRUPA/28-137	A0A0N4T1Z5.1 PF00270.27;DEAD;	75	4.5e-08
TRINITY_DN15659_c0_g2	S9XSB6_9CETA/75-223	S9XSB6.1 PF00270.27;DEAD;	98.6	8.7e-34
TRINITY_DN15659_c0_g3	U3K0M2_FICAL/57-224	U3K0M2.1 PF00270.27;DEAD;	98.5	2.2e-30
TRINITY_DN15661_c0_g1	I1NEV9_SOYBN/10-217	I1NEV9.1 PF01470.15;Peptidase_C15;	100	5.7e-11
TRINITY_DN15666_c0_g3	F1R4W8_DANRE/137-306	F1R4W8.2 PF01017.18;STAT_alpha;	100	2.6e-28
TRINITY_DN15671_c0_g1	I1KW18_SOYBN/3-75	I1KW18.1 PF06592.11;DUF1138;	97.2	1.4e-35
TRINITY_DN15673_c0_g1	I1LJF1_SOYBN/24-141	I1LJF1.1 PF10950.6;Organ_specific;	98.7	3.8e-37
TRINITY_DN15678_c0_g1	F7A5M4_MACMU/19-95	F7A5M4.1 PF00596.19;Aldolase_II;	76.2	1.3e-10
TRINITY_DN15682_c0_g1	V7CJH1_PHAVU/62-334	V7CJH1.1 PF00069.23;Pkinase;	57.4	1.9e-21
TRINITY_DN15687_c0_g2	Q803H7_DANRE/133-224	Q803H7.1 PF04089.12;BRICHOS;	96.1	6.1e-36
TRINITY_DN15688_c0_g1	V7BS99_PHAVU/6-142	V7BS99.1 PF01090.17;Ribosomal_S19e;	95.2	9.7e-64
TRINITY_DN15690_c0_g1	I1MCI8_SOYBN/26-187	I1MCI8.1 PF04862.10;DUF642;	100	1.2e-32
TRINITY_DN15690_c0_g3	I1MCI8_SOYBN/26-187	I1MCI8.1 PF04862.10;DUF642;	100	1.1e-29
TRINITY_DN15696_c1_g1	H2NEP2_PONAB/105-188	H2NEP2.1 PF00189.18;Ribosomal_S3_C;	100	5.5e-20
TRINITY_DN15696_c1_g2	A0A096MRN4_PAPAN/20-96	A0A096MRN4.1 PF07650.15;KH_2;	98.7	1.4e-33
TRINITY_DN15702_c0_g2	A0A087WP98_MOUSE/2-51	A0A087WP98.1 PF03247.12;Prothymosin;	100	4.7e-11
TRINITY_DN15702_c0_g3	A2XZ07_ORYSI/2-231	A2XZ07.1 PF12481.6;DUF3700;	100	1.9e-07
TRINITY_DN15709_c0_g1	Q6PHI8_DANRE/13-281	Q6PHI8.1 PF00456.19;Transketolase_N;	100	2.1e-38
TRINITY_DN1570_c0_g1	E13A_SOYBN/34-346	Q03773.1 PF00332.16;Glyco_hydro_17;	100	2e-108
TRINITY_DN1570_c0_g2	E13A_SOYBN/34-346	Q03773.1 PF00332.16;Glyco_hydro_17;	100	9.1e-60
TRINITY_DN15715_c0_g1	A0A022QHS5_ERYGU/60-108	A0A022QHS5.1 PF03107.14;C1_2;	79.6	1e-15
TRINITY_DN15721_c0_g1	M5WBB3_PRUPE/13-76	M5WBB3.1 PF02953.13;zf-Tim10_DDP;	82.8	8e-25
TRINITY_DN15723_c0_g1	W5LE92_ASTMX/1-80	W5LE92.1 PF01249.16;Ribosomal_S21e;	93.8	2.5e-36
TRINITY_DN15740_c0_g2	A0A067KFW9_JATCU/8-94	A0A067KFW9.1 PF14368.4;LTP_2;	59.3	2.4e-21
TRINITY_DN15747_c0_g2	K4CWV5_SOLLC/757-960	K4CWV5.1 PF13844.4;Glyco_transf_41;	92.3	4.2e-34
TRINITY_DN15750_c0_g1	Q1LWZ1_DANRE/49-90	Q1LWZ1.1 PF00396.16;Granulin;	76.2	3.8e-07
TRINITY_DN15751_c0_g1	G1N2T7_MELGA/14-138	G1N2T7.1 PF02136.18;NTF2;	97.6	1.9e-16
TRINITY_DN15755_c1_g7	K7LT74_SOYBN/40-515	K7LT74.1 PF00232.16;Glyco_hydro_1;	100	1.2e-11
TRINITY_DN15760_c0_g1	I1R0Q5_ORYGL/41-134	I1R0Q5.1 PF00234.20;Tryp_alpha_amyl;	92.6	2.7e-39
TRINITY_DN15763_c0_g1	G7JL38_MEDTR/5-62	G7JL38.1 PF00831.21;Ribosomal_L29;	96.5	4.8e-20
TRINITY_DN15764_c0_g1	V4SAN3_9ROSI/45-142	V4SAN3.1 PF13837.4;Myb_DNA-bind_4;	87.3	2.3e-44
TRINITY_DN15773_c0_g1	A0A0D2M1L9_GOSRA/25-124	A0A0D2M1L9.1 PF00651.29;BTB;	74.3	6.2e-27
TRINITY_DN15773_c0_g5	A0A061DKU9_THECC/215-465	A0A061DKU9.1 PF03000.12;NPH3;	79.6	3.1e-18
TRINITY_DN15775_c0_g1	M0SGX0_MUSAM/9-79	M0SGX0.1 PF00076.20;RRM_1;	85.7	8.8e-12
TRINITY_DN15776_c0_g3	H3BCN0_LATCH/21-296	H3BCN0.1 PF01459.20;Porin_3;	93	5.9e-23
TRINITY_DN15778_c0_g1	F6TD92_MACMU/1-168	F6TD92.1 PF00838.15;TCTP;	95.8	8.8e-88
TRINITY_DN15788_c0_g2	A0A0D2SGF2_GOSRA/10-437	A0A0D2SGF2.1 PF02458.13;Transferase;	69.2	2e-12
TRINITY_DN15789_c0_g1	H2TUK8_TAKRU/9-75	H2TUK8.1 PF16174.3;IHABP4_N;	100	7.5e-10
TRINITY_DN15790_c0_g1	A0A067KXI1_JATCU/34-115	A0A067KXI1.1 PF02298.15;Cu_bind_like;	78.1	5.2e-30
TRINITY_DN15801_c0_g3	V7D286_PHAVU/41-148	V7D286.1 PF00025.19;Arf;	97.2	6.2e-32
TRINITY_DN15804_c0_g1	M1CNX1_SOLTU/37-250	M1CNX1.1 PF00230.18;MIP;	71.8	1.3e-83
TRINITY_DN15819_c0_g1	A0A022RBK1_ERYGU/225-390	A0A022RBK1.1 PF13359.4;DDE_Tnp_4;	78.3	8e-76
TRINITY_DN1581_c0_g1	G1S4R1_NOMLE/186-327	G1S4R1.1 PF10075.7;CSN8_PSD8_EIF3K;	100	3.5e-35
TRINITY_DN15821_c0_g1	I1JR26_SOYBN/898-968	I1JR26.1 PF00626.20;Gelsolin;	93.9	2.3e-10
TRINITY_DN15822_c0_g1	Q24JW2_DANRE/19-142	Q24JW2.1 PF00062.18;Lys;	86.3	3.6e-64
TRINITY_DN15826_c0_g1	F6H2Y4_VITVI/14-84	F6H2Y4.1 PF05383.15;La;	84.5	1.1e-25
TRINITY_DN15826_c0_g2	I1JUS4_SOYBN/357-459	I1JUS4.1 PF08777.9;RRM_3;	73.5	3.6e-35
TRINITY_DN15830_c0_g2	F1QDI6_DANRE/278-330	F1QDI6.1 PF00010.24;HLH;	98.1	3.1e-19
TRINITY_DN15839_c0_g1	M0S8A8_MUSAM/20-134	M0S8A8.1 PF06246.10;Isy1;	72.4	1.2e-39
TRINITY_DN15842_c0_g1	F6H2D6_VITVI/58-155	F6H2D6.1 PF03168.11;LEA_2;	39.4	3e-09
TRINITY_DN15847_c0_g2	A0A0A0K1N4_CUCSA/184-278	A0A0A0K1N4.1 PF04504.12;DUF573;	58.9	1.5e-22
TRINITY_DN15849_c0_g1	A0A0R4IRJ5_DANRE/187-255	A0A0R4IRJ5.1 PF05881.10;CNPase;	92	6.1e-19
TRINITY_DN15857_c1_g1	C6T3C5_SOYBN/35-190	C6T3C5.1 PF04043.13;PMEI;	100	7.1e-16
TRINITY_DN15864_c0_g1	A0A059DEU6_EUCGR/41-185	A0A059DEU6.1 PF03018.12;Dirigent;	46.5	9.4e-28
TRINITY_DN15869_c0_g1	M1D6C9_SOLTU/24-177	M1D6C9.1 PF01764.23;Lipase_3;	57.1	6.4e-41
TRINITY_DN15878_c0_g2	W9R1G9_9ROSA/1-193	W9R1G9.1 PF00230.18;MIP;	69.2	2.1e-08
TRINITY_DN15879_c0_g1	A0A0D2QGZ3_GOSRA/38-124	A0A0D2QGZ3.1 PF02298.15;Cu_bind_like;	72.4	1.2e-19
TRINITY_DN15879_c0_g2	I3SLL8_MEDTR/37-123	I3SLL8.1 PF02298.15;Cu_bind_like;	70.6	2.5e-07
TRINITY_DN15880_c0_g1	D7UAJ8_VITVI/78-364	D7UAJ8.1 PF01193.22;RNA_pol_L;	79.2	1.7e-127
TRINITY_DN15881_c0_g1	A0A015NDS2_9GLOM/24-229	A0A015NDS2.1 PF11754.6;Velvet;	100	1.2e-32
TRINITY_DN15892_c0_g1	U3K285_FICAL/7-172	U3K285.1 PF00071.20;Ras;	99.3	1.6e-80
TRINITY_DN15894_c0_g3	U9UAG2_RHIID/22-203	U9UAG2.1 PF01062.19;Bestrophin;	82.2	1.5e-28
TRINITY_DN15895_c0_g1	I1LWZ7_SOYBN/70-716	I1LWZ7.2 PF03639.11;Glyco_hydro_81;	100	2.2e-78
TRINITY_DN15897_c0_g1	FRIL1_MOUSE/14-155	P29391.2 PF00210.22;Ferritin;	99.3	6.5e-74
TRINITY_DN15899_c0_g1	B9T4U6_RICCO/94-400	B9T4U6.1 PF01207.15;Dus;	82.4	6.4e-152
TRINITY_DN15904_c0_g1	V7BJX9_PHAVU/228-302	V7BJX9.1 PF13432.4;TPR_16;	82.4	1.1e-27
TRINITY_DN15906_c0_g1	A0A0P7UM37_9TELE/24-257	A0A0P7UM37.1 PF01275.17;Myelin_PLP;	94.4	2.9e-24
TRINITY_DN15907_c0_g1	B9H0B6_POPTR/6-57	B9H0B6.1 PF00847.18;AP2;	98.1	3.3e-23
TRINITY_DN15913_c0_g1	A9PCG2_POPTR/20-86	A9PCG2.1 PF08583.8;Cmc1;	82.1	9.5e-26
TRINITY_DN15914_c0_g1	I1JD52_SOYBN/38-529	I1JD52.1 PF00118.22;Cpn60_TCP1;	98.6	3.5e-27
TRINITY_DN15915_c0_g1	A0A061E316_THECC/100-390	A0A061E316.1 PF03000.12;NPH3;	80.1	6e-124
TRINITY_DN15916_c0_g1	M5W0A5_PRUPE/92-194	M5W0A5.1 PF03948.12;Ribosomal_L9_C;	81.2	1.1e-37
TRINITY_DN15924_c0_g1	A0A0J8FCZ3_BETVU/23-102	A0A0J8FCZ3.1 PF01722.16;BolA;	77.5	1e-26
TRINITY_DN15929_c0_g1	I1JUD7_SOYBN/16-306	I1JUD7.1 PF03151.14;TPT;	100	4.5e-61
TRINITY_DN15930_c0_g1	A0A0R0K666_SOYBN/284-436	A0A0R0K666.1 PF14541.4;TAXi_C;	100	4.3e-39
TRINITY_DN15930_c0_g2	V7AVI2_PHAVU/97-260	V7AVI2.1 PF14543.4;TAXi_N;	93.9	2.1e-28
TRINITY_DN15932_c0_g1	I1KR17_SOYBN/36-303	I1KR17.1 PF04674.10;Phi_1;	100	1e-34
TRINITY_DN15935_c1_g3	U5GA04_POPTR/29-192	U5GA04.1 PF03024.12;Folate_rec;	72.6	1.6e-72
TRINITY_DN15938_c0_g1	H3CI30_TETNG/12-35	H3CI30.1 PF01754.14;zf-A20;	95.8	6e-07
TRINITY_DN15942_c0_g1	B9H1M5_POPTR/78-324	B9H1M5.2 PF00348.15;polyprenyl_synt;	81.8	5.2e-112
TRINITY_DN15944_c0_g1	W1P5X3_AMBTC/44-102	W1P5X3.1 PF09597.8;IGR;	83.3	5e-19
TRINITY_DN15958_c0_g1	A0A061DQF4_THECC/19-97	A0A061DQF4.1 PF04281.11;Tom22;	81.9	1.8e-24
TRINITY_DN15959_c0_g2	W5LYA0_LEPOC/87-770	W5LYA0.1 PF00063.19;Myosin_head;	94.4	2.5e-33
TRINITY_DN15959_c0_g5	G3GZ37_CRIGR/121-441	G3GZ37.1 PF00063.19;Myosin_head;	93.5	1.9e-13
TRINITY_DN15966_c0_g1	M5XL63_PRUPE/9-131	M5XL63.1 PF06110.9;DUF953;	80.5	8.3e-55
TRINITY_DN15969_c0_g1	PRO25_ORYSJ/47-144	P17048.2 PF00234.20;Tryp_alpha_amyl;	91.8	1.1e-41
TRINITY_DN15970_c0_g1	K4DFT0_SOLLC/22-167	K4DFT0.1 PF10604.7;Polyketide_cyc2;	86.9	3.7e-62
TRINITY_DN15987_c0_g1	A0A015KE30_9GLOM/20-144	A0A015KE30.1 PF00293.26;NUDIX;	74.5	1.7e-32
TRINITY_DN15992_c0_g1	F6QC10_CALJA/91-200	F6QC10.1 PF01398.19;JAB;	93.7	2.2e-37
TRINITY_DN15_c0_g1	A0A0D3H5Y5_9ORYZ/3-267	A0A0D3H5Y5.1 PF01459.20;Porin_3;	100	6.3e-25
TRINITY_DN16004_c0_g1	Q67UI5_ORYSJ/689-721	Q67UI5.1 PF00514.21;Arm;	84.8	2.1e-06
TRINITY_DN16006_c0_g2	V4UEX2_9ROSI/44-90	V4UEX2.1 PF13812.4;PPR_3;	68.1	1.1e-08
TRINITY_DN16012_c0_g1	A0A015KD54_9GLOM/144-858	A0A015KD54.1 PF00343.18;Phosphorylase;	92.8	2.5e-30
TRINITY_DN16012_c0_g2	A0A015KD54_9GLOM/144-858	A0A015KD54.1 PF00343.18;Phosphorylase;	82.4	1.6e-26
TRINITY_DN16017_c0_g1	U9TFV0_RHIID/8-80	U9TFV0.1 PF00173.26;Cyt-b5;	95.5	5.1e-29
TRINITY_DN16020_c1_g1	NU5M_DANRE/134-420	Q9MIY0.1 PF00361.18;Proton_antipo_M;	93.4	1.6e-143
TRINITY_DN16020_c1_g2	NU5M_RAT/65-122	P11661.3 PF00662.18;Proton_antipo_N;	85.7	2.4e-13
TRINITY_DN16022_c0_g1	M1BC20_SOLTU/40-286	M1BC20.1 PF00141.21;peroxidase;	85.6	3.6e-73
TRINITY_DN16023_c0_g1	A0A022QNW7_ERYGU/11-84	A0A022QNW7.1 PF13656.4;RNA_pol_L_2;	76.4	3.5e-27
TRINITY_DN16026_c0_g1	A0A067HFS4_CITSI/1-192	A0A067HFS4.1 PF00955.19;HCO3_cotransp;	89.5	2.8e-13
TRINITY_DN16032_c0_g1	D7TRZ0_VITVI/32-116	D7TRZ0.1 PF00011.19;HSP20;	77.4	1.4e-30
TRINITY_DN16036_c0_g1	A0A0D9V045_9ORYZ/3-42	A0A0D9V045.1 PF01779.15;Ribosomal_L29e;	97.5	9.3e-14
TRINITY_DN16042_c0_g1	D7U396_VITVI/20-100	D7U396.1 PF05899.10;Cupin_3;	91.2	1.1e-12
TRINITY_DN16042_c0_g2	K4C3J0_SOLLC/24-99	K4C3J0.1 PF05899.10;Cupin_3;	83.3	1.7e-26
TRINITY_DN16047_c0_g2	M5XQN2_PRUPE/78-306	M5XQN2.1 PF07859.11;Abhydrolase_3;	58.3	3.9e-77
TRINITY_DN16050_c0_g1	A0A093DM08_CHAPE/20-114	A0A093DM08.1 PF00338.20;Ribosomal_S10;	98.9	3.4e-45
TRINITY_DN16050_c0_g2	A0A093DM08_CHAPE/20-114	A0A093DM08.1 PF00338.20;Ribosomal_S10;	98.8	3.3e-39
TRINITY_DN16052_c0_g1	A0A067EYC8_CITSI/14-131	A0A067EYC8.1 PF02365.13;NAM;	80.9	4.3e-18
TRINITY_DN16059_c0_g1	Q6P943_DANRE/140-316	Q6P943.1 PF01017.18;STAT_alpha;	82.8	4.1e-21
TRINITY_DN16061_c0_g2	M5VXA1_PRUPE/48-294	M5VXA1.1 PF03087.12;DUF241;	52	7.7e-16
TRINITY_DN16065_c0_g3	B9SE30_RICCO/99-549	B9SE30.1 PF00082.20;Peptidase_S8;	77.6	3.3e-19
TRINITY_DN16067_c0_g2	I1L4Z3_SOYBN/6-72	I1L4Z3.1 PF00076.20;RRM_1;	100	3.8e-19
TRINITY_DN16069_c0_g1	M1AI62_SOLTU/1-185	M1AI62.1 PF14009.4;DUF4228;	55.7	9.2e-50
TRINITY_DN16073_c0_g4	F1QWX8_DANRE/509-769	F1QWX8.1 PF07714.15;Pkinase_Tyr;	98.5	2e-32
TRINITY_DN16073_c0_g6	W5LAY4_ASTMX/534-794	W5LAY4.1 PF07714.15;Pkinase_Tyr;	86.3	5.7e-19
TRINITY_DN16076_c0_g2	A0A061DLR3_THECC/84-134	A0A061DLR3.1 PF13041.4;PPR_2;	78.4	1.8e-16
TRINITY_DN16085_c0_g1	A0A067GX37_CITSI/40-182	A0A067GX37.1 PF03018.12;Dirigent;	65.2	3.9e-47
TRINITY_DN16090_c0_g1	A0A022QNW7_ERYGU/11-84	A0A022QNW7.1 PF13656.4;RNA_pol_L_2;	84.7	2.9e-28
TRINITY_DN16092_c0_g1	A0A022RJU8_ERYGU/44-142	A0A022RJU8.1 PF01657.15;Stress-antifung;	74.5	2.4e-37
TRINITY_DN16094_c0_g1	W5MUG1_LEPOC/12-106	W5MUG1.1 PF01248.24;Ribosomal_L7Ae;	97.9	2.8e-46
TRINITY_DN16096_c0_g1	K4B0A2_SOLLC/9-113	K4B0A2.1 PF00581.18;Rhodanese;	78.1	2.2e-44
TRINITY_DN16099_c0_g1	E7F4L2_DANRE/149-395	E7F4L2.1 PF00069.23;Pkinase;	98.5	3.9e-32
TRINITY_DN16109_c0_g1	B9SNF3_RICCO/20-233	B9SNF3.1 PF01596.15;Methyltransf_3;	62.6	1.2e-71
TRINITY_DN16110_c0_g1	K7MZ15_SOYBN/104-347	K7MZ15.1 PF02784.14;Orn_Arg_deC_N;	96.7	1.2e-43
TRINITY_DN16114_c0_g1	A0A087YGD0_POEFO/246-310	A0A087YGD0.1 PF00536.28;SAM_1;	78.7	3.1e-19
TRINITY_DN16117_c1_g1	W5P508_SHEEP/394-592	W5P508.1 PF08662.9;eIF2A;	100	2e-21
TRINITY_DN16118_c0_g1	Q7ZTT6_DANRE/98-221	Q7ZTT6.1 PF00153.25;Mito_carr;	83.8	5.2e-25
TRINITY_DN16118_c0_g2	Q7ZTT6_DANRE/3-97	Q7ZTT6.1 PF00153.25;Mito_carr;	94.9	2.8e-13
TRINITY_DN16121_c0_g1	A0A067BV58_SAPPC/8-234	A0A067BV58.1 PF04750.12;Far-17a_AIG1;	26	1.4e-06
TRINITY_DN16122_c0_g1	A0A0D2N2G9_GOSRA/4-73	A0A0D2N2G9.1 PF00240.21;ubiquitin;	98.6	2.6e-33
TRINITY_DN16125_c0_g1	A0A022RX36_ERYGU/1-167	A0A022RX36.1 PF07086.10;Jagunal;	55.1	8.7e-38
TRINITY_DN16126_c0_g1	B9HWI6_POPTR/271-327	B9HWI6.2 PF09280.9;XPC-binding;	98.2	4.9e-23
TRINITY_DN16127_c0_g1	A0A015K3E4_9GLOM/5-105	A0A015K3E4.1 PF00168.28;C2;	89.8	4.5e-22
TRINITY_DN16129_c0_g1	C6T3C8_SOYBN/13-101	C6T3C8.1 PF14368.4;LTP_2;	100	1.9e-14
TRINITY_DN16140_c0_g1	I1LKU8_SOYBN/10-62	I1LKU8.1 PF02238.13;COX7a;	100	1.5e-22
TRINITY_DN16142_c0_g1	K7L5D4_SOYBN/36-273	K7L5D4.1 PF00481.19;PP2C;	100	9.6e-49
TRINITY_DN16149_c0_g1	F6I364_VITVI/46-88	F6I364.1 PF01476.18;LysM;	95.3	3e-16
TRINITY_DN16153_c0_g1	A0A0R4INL6_DANRE/1240-1376	A0A0R4INL6.1 PF00754.23;F5_F8_type_C;	84.8	3.8e-10
TRINITY_DN16154_c0_g1	A0A022RKF2_ERYGU/33-209	A0A022RKF2.1 PF05241.10;EBP;	77.3	2.9e-74
TRINITY_DN16164_c0_g1	Q946V8_MAIZE/23-167	Q946V8.1 PF01559.14;Zein;	100	2.2e-36
TRINITY_DN16165_c0_g1	H3DCR5_TETNG/64-316	H3DCR5.1 PF00069.23;Pkinase;	91.5	3.4e-17
TRINITY_DN16165_c0_g2	B0S6K2_DANRE/484-545	B0S6K2.1 PF00659.16;POLO_box;	93.6	4e-19
TRINITY_DN1616_c0_g1	A0A0E0BEY1_9ORYZ/94-160	A0A0E0BEY1.1 PF00076.20;RRM_1;	100	1e-23
TRINITY_DN16170_c0_g1	A0A0J8B800_BETVU/2-134	A0A0J8B800.1 PF00078.25;RVT_1;	61.2	2.5e-21
TRINITY_DN16176_c0_g1	K4CR62_SOLLC/419-492	K4CR62.1 PF16135.3;Jas;	87.8	8.6e-34
TRINITY_DN16177_c0_g1	D7TN38_VITVI/79-220	D7TN38.1 PF04073.13;tRNA_edit;	85.9	2.1e-67
TRINITY_DN16179_c0_g1	W5LR74_ASTMX/54-316	W5LR74.1 PF00735.16;Septin;	95.4	5.6e-43
TRINITY_DN16179_c0_g2	G3NCA5_GASAC/1-120	G3NCA5.1 PF00735.16;Septin;	97.2	1.9e-12
TRINITY_DN16180_c0_g1	D7TZ94_VITVI/49-161	D7TZ94.1 PF14226.4;DIOX_N;	72.2	1e-39
TRINITY_DN16182_c0_g2	A0A059BI33_EUCGR/158-310	A0A059BI33.1 PF02544.14;Steroid_dh;	89.5	7.6e-80
TRINITY_DN16185_c0_g2	V7BG25_PHAVU/5-63	V7BG25.1 PF00403.24;HMA;	96.6	4.2e-23
TRINITY_DN16186_c0_g1	W5FLN6_WHEAT/21-119	W5FLN6.1 PF00355.24;Rieske;	87.9	1.6e-49
TRINITY_DN16189_c0_g1	A0A061GI36_THECC/40-476	A0A061GI36.1 PF00067.20;p450;	55.1	9.1e-139
TRINITY_DN16198_c0_g3	A0A0E0L0T2_ORYPU/27-307	A0A0E0L0T2.1 PF01875.15;Memo;	100	3.2e-36
TRINITY_DN16199_c0_g1	K4BFD4_SOLLC/106-287	K4BFD4.1 PF01507.17;PAPS_reduct;	93.4	1.4e-44
TRINITY_DN16202_c0_g1	A0A067G4K5_CITSI/69-144	A0A067G4K5.1 PF04564.13;U-box;	68.6	2.8e-19
TRINITY_DN16207_c0_g1	A0A067KPX6_JATCU/32-284	A0A067KPX6.1 PF07651.14;ANTH;	55.7	3.1e-81
TRINITY_DN16209_c0_g1	B8JKN6_DANRE/7-163	B8JKN6.1 PF00160.19;Pro_isomerase;	89.2	9.5e-80
TRINITY_DN16209_c0_g2	H2VEH7_TAKRU/38-194	H2VEH7.1 PF00160.19;Pro_isomerase;	80	2.2e-11
TRINITY_DN16209_c0_g3	B8JKN6_DANRE/7-163	B8JKN6.1 PF00160.19;Pro_isomerase;	99.4	7.9e-88
TRINITY_DN16211_c0_g1	Q6I608_ORYSJ/11-105	Q6I608.1 PF01247.16;Ribosomal_L35Ae;	100	2.9e-48
TRINITY_DN16215_c0_g1	I1K225_SOYBN/25-296	I1K225.2 PF00931.20;NB-ARC;	100	1.2e-17
TRINITY_DN16216_c0_g1	B4FCU1_MAIZE/44-118	B4FCU1.1 PF01929.15;Ribosomal_L14e;	96	3.6e-32
TRINITY_DN16216_c0_g2	I1NI77_SOYBN/44-118	I1NI77.1 PF01929.15;Ribosomal_L14e;	98.2	5.5e-22
TRINITY_DN16217_c0_g1	B9N2T5_POPTR/674-883	B9N2T5.1 PF05362.11;Lon_C;	88	8.7e-52
TRINITY_DN16217_c0_g4	A0A067LC38_JATCU/676-885	A0A067LC38.1 PF05362.11;Lon_C;	94.1	2.8e-10
TRINITY_DN16219_c0_g1	Q4W898_DANRE/113-242	Q4W898.1 PF00229.16;TNF;	65.7	2.3e-41
TRINITY_DN16222_c0_g1	J3QL01_HUMAN/2-67	J3QL01.1 PF01781.16;Ribosomal_L38e;	100	1.9e-25
TRINITY_DN16225_c0_g1	Q6P5K5_DANRE/22-112	Q6P5K5.1 PF00428.17;Ribosomal_60s;	95.5	1.2e-15
TRINITY_DN16226_c0_g1	F1QFT0_DANRE/466-723	F1QFT0.1 PF00089.24;Trypsin;	73.4	9.1e-105
TRINITY_DN16227_c0_g1	I1KGW5_SOYBN/2-49	I1KGW5.2 PF00646.31;F-box;	59.1	1.5e-06
TRINITY_DN16229_c0_g1	A0A022S5Q6_ERYGU/484-696	A0A022S5Q6.1 PF00644.18;PARP;	81.8	2e-96
TRINITY_DN16231_c0_g1	Q6PFU1_DANRE/12-229	Q6PFU1.1 PF00335.18;Tetraspannin;	80.4	6e-94
TRINITY_DN16232_c0_g1	A0A0A0KU62_CUCSA/64-155	A0A0A0KU62.1 PF12542.6;CWC25;	75	1e-25
TRINITY_DN16235_c0_g1	D7TSX1_VITVI/40-355	D7TSX1.1 PF03492.13;Methyltransf_7;	46.9	2.1e-69
TRINITY_DN16236_c0_g1	U9UWG1_RHIID/1-141	U9UWG1.1 PF00067.20;p450;	62.9	3.1e-15
TRINITY_DN16236_c0_g2	A0A015LVU8_9GLOM/37-493	A0A015LVU8.1 PF00067.20;p450;	77.7	1.6e-35
TRINITY_DN16239_c0_g1	F6I223_VITVI/1-163	F6I223.1 PF14009.4;DUF4228;	64.3	7.3e-44
TRINITY_DN16247_c0_g2	I1LC49_SOYBN/52-217	I1LC49.1 PF14543.4;TAXi_N;	100	9.4e-90
TRINITY_DN16251_c0_g1	G3Q882_GASAC/1-486	G3Q882.1 PF00118.22;Cpn60_TCP1;	94.7	2.9e-32
TRINITY_DN16251_c0_g2	TCPD_TAKRU/41-536	P53451.1 PF00118.22;Cpn60_TCP1;	91.6	6.3e-36
TRINITY_DN16254_c0_g2	I1MG85_SOYBN/125-192	I1MG85.1 PF00542.17;Ribosomal_L12;	85.3	4.3e-23
TRINITY_DN16259_c0_g2	K4CW67_SOLLC/74-133	K4CW67.1 PF00830.17;Ribosomal_L28;	91.7	1.1e-24
TRINITY_DN16260_c0_g2	V7AS39_PHAVU/290-355	V7AS39.1 PF08498.8;Sterol_MT_C;	100	6e-33
TRINITY_DN16275_c0_g2	A0A0N4WBM5_HAEPC/48-286	A0A0N4WBM5.1 PF00100.21;Zona_pellucida;	93.4	8.8e-37
TRINITY_DN16282_c0_g2	A0A0E0PMB1_ORYRU/16-159	A0A0E0PMB1.1 PF01429.17;MBD;	57.3	1.3e-39
TRINITY_DN16283_c1_g2	B8JI17_DANRE/20-52	B8JI17.1 PF02199.13;SapA;	100	5.5e-14
TRINITY_DN16283_c1_g4	E7FCT1_DANRE/353-386	E7FCT1.1 PF03489.15;SapB_2;	90.9	5.4e-10
TRINITY_DN16283_c1_g5	B8JI17_DANRE/403-440	B8JI17.1 PF05184.13;SapB_1;	100	6.1e-14
TRINITY_DN16285_c0_g1	A0A022RWW6_ERYGU/21-120	A0A022RWW6.1 PF00254.26;FKBP_C;	84.8	1.5e-44
TRINITY_DN16291_c0_g1	U3KGV4_FICAL/17-124	U3KGV4.1 PF01655.16;Ribosomal_L32e;	94.4	6.9e-52
TRINITY_DN16294_c0_g2	F2Q9A3_PIG/7-163	F2Q9A3.1 PF00160.19;Pro_isomerase;	98.9	3.3e-45
TRINITY_DN16294_c0_g3	F2Q9A3_PIG/7-163	F2Q9A3.1 PF00160.19;Pro_isomerase;	94.6	2.5e-35
TRINITY_DN16302_c0_g1	A0A061GST6_THECC/110-631	A0A061GST6.1 PF07944.10;Glyco_hydro_127;	68.6	2.7e-16
TRINITY_DN16311_c0_g1	F1QTF9_DANRE/696-883	F1QTF9.1 PF06668.10;ITI_HC_C;	64.8	1.1e-33
TRINITY_DN16313_c0_g2	APOE_RAT/73-284	P02650.2 PF01442.16;Apolipoprotein;	97.1	8e-09
TRINITY_DN16314_c0_g1	M0TJ40_MUSAM/22-177	M0TJ40.1 PF02466.17;Tim17;	91.9	5.3e-59
TRINITY_DN16318_c0_g2	M1D5L8_SOLTU/7-134	M1D5L8.1 PF00903.23;Glyoxalase;	78.7	6.8e-56
TRINITY_DN16320_c1_g1	A2AR64_DANRE/151-207	A2AR64.1 PF00084.18;Sushi;	73.7	6.2e-20
TRINITY_DN16320_c1_g2	F1R6Q9_DANRE/3-64	F1R6Q9.1 PF00084.18;Sushi;	54.2	7.4e-08
TRINITY_DN16321_c0_g1	W9QKX8_9ROSA/59-154	W9QKX8.1 PF06749.10;DUF1218;	79.4	1.8e-37
TRINITY_DN16324_c0_g2	U6Q086_HAECO/1178-1299	U6Q086.1 PF16469.3;NPA;	51.3	8.4e-12
TRINITY_DN16325_c0_g1	A0A087X518_POEFO/145-277	A0A087X518.2 PF03464.13;eRF1_2;	98.5	2.6e-29
TRINITY_DN16326_c0_g1	C5WSV6_SORBI/36-91	C5WSV6.1 PF01849.16;NAC;	92.5	5.1e-20
TRINITY_DN16334_c0_g1	W5LAV1_ASTMX/86-369	W5LAV1.1 PF00069.23;Pkinase;	95	1.4e-37
TRINITY_DN16339_c1_g1	I1LPP4_SOYBN/5-71	I1LPP4.1 PF00313.20;CSD;	100	3.5e-30
TRINITY_DN16341_c0_g1	U9UUD4_RHIID/5-57	U9UUD4.1 PF05532.10;CsbD;	73.6	2.9e-13
TRINITY_DN16341_c0_g2	U9UUD4_RHIID/5-57	U9UUD4.1 PF05532.10;CsbD;	79.2	9.2e-16
TRINITY_DN16341_c0_g3	U9UUD4_RHIID/5-57	U9UUD4.1 PF05532.10;CsbD;	79.2	1.6e-15
TRINITY_DN16347_c0_g2	I1LEJ7_SOYBN/34-149	I1LEJ7.1 PF08240.10;ADH_N;	97.8	5.8e-51
TRINITY_DN16349_c0_g1	K7K8F7_SOYBN/24-191	K7K8F7.1 PF02041.14;Auxin_BP;	77.8	5.9e-78
TRINITY_DN16350_c0_g1	I1JX76_SOYBN/248-324	I1JX76.2 PF13424.4;TPR_12;	63.5	4.2e-19
TRINITY_DN16358_c0_g1	A0A067ELW7_CITSI/29-287	A0A067ELW7.1 PF00704.26;Glyco_hydro_18;	63.2	4e-89
TRINITY_DN16362_c0_g1	A0A0J8BXQ1_BETVU/349-613	A0A0J8BXQ1.1 PF00128.22;Alpha-amylase;	86.1	5.2e-56
TRINITY_DN16365_c0_g1	Q6P0I3_DANRE/10-112	Q6P0I3.1 PF00153.25;Mito_carr;	75	1.1e-10
TRINITY_DN16371_c0_g1	B0V1K7_DANRE/65-319	B0V1K7.1 PF00001.19;7tm_1;	87.1	4.2e-123
TRINITY_DN16375_c0_g3	D8PTR9_SCHCM/464-592	D8PTR9.1 PF00005.25;ABC_tran;	83.1	3.5e-33
TRINITY_DN16382_c0_g1	L8HKE1_ACACA/60-314	L8HKE1.1 PF01261.22;AP_endonuc_2;	59.5	3.1e-53
TRINITY_DN16385_c0_g1	A0A059D9P8_EUCGR/84-234	A0A059D9P8.1 PF03100.13;CcmE;	84.7	3.8e-65
TRINITY_DN16387_c0_g1	K4D596_SOLLC/226-372	K4D596.1 PF00849.20;PseudoU_synth_2;	87.8	6e-69
TRINITY_DN16392_c0_g2	A0A067EDN3_CITSI/246-450	A0A067EDN3.1 PF14681.4;UPRTase;	43.6	2.9e-15
TRINITY_DN16393_c0_g1	I1GDW1_AMPQE/630-753	I1GDW1.1 PF00005.25;ABC_tran;	45.6	1.6e-07
TRINITY_DN16394_c1_g1	A0A061H057_THECC/52-302	A0A061H057.1 PF00704.26;Glyco_hydro_18;	82.9	4.9e-121
TRINITY_DN16396_c0_g3	M0ZW94_SOLTU/41-85	M0ZW94.1 PF13639.4;zf-RING_2;	63	6.4e-11
TRINITY_DN16398_c0_g1	A0A067HA84_CITSI/222-360	A0A067HA84.1 PF07526.9;POX;	54.2	2.4e-25
TRINITY_DN163_c0_g1	I1PAA9_ORYGL/134-379	I1PAA9.1 PF00481.19;PP2C;	100	4.6e-10
TRINITY_DN16400_c0_g1	A0A0B0NRS1_GOSAR/5-70	A0A0B0NRS1.1 PF10247.7;Romo1;	93.8	6.3e-15
TRINITY_DN16407_c0_g2	A0A0R4IGG3_DANRE/3-241	A0A0R4IGG3.1 PF00121.16;TIM;	100	9.8e-71
TRINITY_DN16408_c0_g2	F7HUZ7_CALJA/70-149	F7HUZ7.1 PF00312.20;Ribosomal_S15;	98.8	1.6e-36
TRINITY_DN16410_c0_g1	A0A0R4IE30_DANRE/2-104	A0A0R4IE30.1 PF15151.4;RGCC;	80.2	2.9e-36
TRINITY_DN16410_c0_g3	Q1LYC9_DANRE/59-118	Q1LYC9.1 PF13833.4;EF-hand_8;	100	6.8e-28
TRINITY_DN16416_c0_g1	A0A022RIY0_ERYGU/137-172	A0A022RIY0.1 PF05553.9;DUF761;	91.4	1.8e-09
TRINITY_DN16420_c0_g1	A9P7V1_POPTR/24-253	A9P7V1.1 PF01048.18;PNP_UDP_1;	83.9	3.8e-106
TRINITY_DN16421_c0_g1	A0A067K993_JATCU/631-706	A0A067K993.1 PF00076.20;RRM_1;	88.2	5e-31
TRINITY_DN16427_c0_g1	A0A0D2RMC3_GOSRA/19-276	A0A0D2RMC3.1 PF00069.23;Pkinase;	59.8	1.8e-87
TRINITY_DN16432_c0_g1	K7LXQ8_SOYBN/304-573	K7LXQ8.1 PF00069.23;Pkinase;	71.7	1.6e-31
TRINITY_DN16436_c0_g1	D7SVF0_VITVI/9-104	D7SVF0.1 PF14368.4;LTP_2;	67	9.8e-33
TRINITY_DN16438_c0_g4	I0J182_9ORYZ/7-170	I0J182.1 PF00160.19;Pro_isomerase;	100	6e-94
TRINITY_DN16440_c0_g2	W5KG58_ASTMX/6-111	W5KG58.1 PF03297.13;Ribosomal_S25;	93.3	9.9e-45
TRINITY_DN16440_c0_g3	W5KG58_ASTMX/6-111	W5KG58.1 PF03297.13;Ribosomal_S25;	94.3	8.8e-46
TRINITY_DN16444_c0_g1	D7TCA0_VITVI/10-101	D7TCA0.1 PF02519.12;Auxin_inducible;	69.9	9.9e-26
TRINITY_DN16449_c0_g1	A0A0D2SXU9_GOSRA/6-176	A0A0D2SXU9.1 PF01956.14;DUF106;	88.6	1e-72
TRINITY_DN16453_c0_g2	A0A022QMN7_ERYGU/311-379	A0A022QMN7.1 PF16135.3;Jas;	83.6	1.3e-28
TRINITY_DN16455_c0_g1	F6ZKB1_ORNAN/16-86	F6ZKB1.1 PF00076.20;RRM_1;	97.9	4.5e-20
TRINITY_DN16458_c0_g1	W5H9U0_WHEAT/97-144	W5H9U0.1 PF00249.29;Myb_DNA-binding;	93.6	3.8e-19
TRINITY_DN16460_c0_g1	F6HE15_VITVI/585-708	F6HE15.1 PF00145.15;DNA_methylase;	62.9	5.2e-37
TRINITY_DN16461_c1_g1	A0A0K9P3J2_ZOSMR/1-82	A0A0K9P3J2.1 PF03732.15;Retrotrans_gag;	36.2	1.5e-06
TRINITY_DN16467_c1_g2	B9I659_POPTR/74-392	B9I659.2 PF03016.13;Exostosin;	87.1	5.1e-59
TRINITY_DN16467_c1_g5	M1DUT4_SOLTU/116-406	M1DUT4.1 PF03151.14;TPT;	88.5	9.4e-47
TRINITY_DN16468_c0_g1	A0A0R4IWL6_DANRE/1030-1064	A0A0R4IWL6.1 PF00806.17;PUF;	100	5.2e-11
TRINITY_DN16471_c0_g1	K4BKE4_SOLLC/560-892	K4BKE4.1 PF01937.17;DUF89;	87.2	1.8e-15
TRINITY_DN16476_c0_g2	A0A0K0FE05_9BILA/185-288	A0A0K0FE05.1 PF00992.18;Troponin;	63.6	8.9e-17
TRINITY_DN16477_c0_g2	A0A067K6G1_JATCU/33-169	A0A067K6G1.1 PF00179.24;UQ_con;	97.5	2.8e-41
TRINITY_DN16478_c0_g1	A0A0D2QTE0_GOSRA/31-120	A0A0D2QTE0.1 PF00298.17;Ribosomal_L11;	57	2.6e-27
TRINITY_DN16478_c0_g2	F7AEF4_MACMU/42-111	F7AEF4.1 PF00298.17;Ribosomal_L11;	98.6	1.1e-30
TRINITY_DN16479_c0_g1	S8CTT9_9LAMI/47-79	S8CTT9.1 PF14852.4;Fis1_TPR_N;	87.5	5.2e-07
TRINITY_DN16483_c0_g1	A0A0N4U4U0_DRAME/36-179	A0A0N4U4U0.1 PF14927.4;Neurensin;	62.5	1.5e-17
TRINITY_DN16486_c0_g1	A0A091DL65_FUKDA/75-145	A0A091DL65.1 PF00076.20;RRM_1;	93.8	1.1e-19
TRINITY_DN1648_c0_g1	A0A0D3H4F8_9ORYZ/7-68	A0A0D3H4F8.1 PF00403.24;HMA;	96.7	2.3e-24
TRINITY_DN16493_c0_g1	A0A072UCY9_MEDTR/94-259	A0A072UCY9.1 PF01214.16;CK_II_beta;	80.6	7.9e-68
TRINITY_DN16494_c0_g4	A0A0D2VI76_GOSRA/388-504	A0A0D2VI76.1 PF00271.29;Helicase_C;	94.5	1.8e-53
TRINITY_DN16495_c0_g1	F7G013_ORNAN/1-53	F7G013.1 PF01907.17;Ribosomal_L37e;	96.2	5.7e-23
TRINITY_DN16495_c0_g2	F7G013_ORNAN/1-53	F7G013.1 PF01907.17;Ribosomal_L37e;	100	1.8e-23
TRINITY_DN16496_c0_g1	A0A061G725_THECC/142-281	A0A061G725.1 PF12695.5;Abhydrolase_5;	75.7	6e-58
TRINITY_DN16501_c0_g1	V9F348_PHYPR/54-242	V9F348.1 PF00804.23;Syntaxin;	39.5	3.5e-21
TRINITY_DN16504_c0_g2	A0A067G0T2_CITSI/100-147	A0A067G0T2.1 PF13041.4;PPR_2;	86.7	6.4e-07
TRINITY_DN16505_c0_g1	A0A067L4X4_JATCU/11-182	A0A067L4X4.1 PF03152.12;UFD1;	84.9	5.4e-84
TRINITY_DN16508_c0_g2	A0A0E0LF36_ORYPU/23-204	A0A0E0LF36.1 PF00722.19;Glyco_hydro_16;	100	1.3e-60
TRINITY_DN16508_c0_g4	Q0J9U2_ORYSJ/181-229	Q0J9U2.1 PF06955.10;XET_C;	100	8.7e-14
TRINITY_DN16509_c0_g1	M1BZP2_SOLTU/47-169	M1BZP2.1 PF00188.24;CAP;	74	3.5e-49
TRINITY_DN16513_c0_g1	A0A059AC60_EUCGR/216-259	A0A059AC60.1 PF13639.4;zf-RING_2;	90.5	1.3e-16
TRINITY_DN16515_c0_g1	A0A0J8D2D3_BETVU/54-157	A0A0J8D2D3.1 PF00011.19;HSP20;	87.5	2.1e-45
TRINITY_DN16518_c0_g1	E1B8G4_BOVIN/8-142	E1B8G4.2 PF00164.23;Ribosom_S12_S23;	94.5	6.5e-62
TRINITY_DN16519_c0_g1	V4U8A2_9ROSI/4-69	V4U8A2.1 PF13499.4;EF-hand_7;	71.7	1.2e-09
TRINITY_DN16524_c0_g2	A0A072TYG3_MEDTR/261-447	A0A072TYG3.1 PF05193.19;Peptidase_M16_C;	93	5.9e-24
TRINITY_DN16528_c0_g1	B0S776_DANRE/89-308	B0S776.1 PF16019.3;CSRNP_N;	85.5	2.4e-27
TRINITY_DN16531_c0_g1	L5LTN0_MYODS/23-100	L5LTN0.1 PF00935.17;Ribosomal_L44;	100	1.8e-37
TRINITY_DN16531_c0_g2	L5LTN0_MYODS/23-100	L5LTN0.1 PF00935.17;Ribosomal_L44;	98.7	2.8e-37
TRINITY_DN16532_c0_g1	V4UCG4_9ROSI/132-203	V4UCG4.1 PF02325.15;YGGT;	90.3	3.3e-31
TRINITY_DN16534_c0_g1	I3IST4_DANRE/18-59	I3IST4.1 PF00396.16;Granulin;	81	9.6e-17
TRINITY_DN16535_c0_g1	M5WWB3_PRUPE/7-129	M5WWB3.1 PF01408.20;GFO_IDH_MocA;	77.4	4.4e-47
TRINITY_DN16537_c0_g1	Q7ZUC6_DANRE/51-132	Q7ZUC6.1 PF00017.22;SH2;	93.9	4.6e-38
TRINITY_DN16538_c0_g1	A0A0D2R9D0_GOSRA/260-368	A0A0D2R9D0.1 PF00647.17;EF1G;	92.5	5.6e-56
TRINITY_DN16541_c0_g1	M0ZXA2_SOLTU/174-300	M0ZXA2.1 PF00080.18;Sod_Cu;	77	4.9e-24
TRINITY_DN16542_c0_g2	A0A0P7UEV9_9TELE/802-905	A0A0P7UEV9.1 PF00435.19;Spectrin;	96.2	1.5e-21
TRINITY_DN16542_c0_g3	W5L9B0_ASTMX/826-892	W5L9B0.1 PF08726.8;EFhand_Ca_insen;	94.3	3.3e-21
TRINITY_DN16542_c0_g5	W5M0C7_LEPOC/488-591	W5M0C7.1 PF00435.19;Spectrin;	92	3.4e-33
TRINITY_DN16544_c0_g2	A0A022PT15_ERYGU/72-531	A0A022PT15.1 PF02450.13;LCAT;	79.8	1.7e-47
TRINITY_DN16548_c0_g1	I1KKK1_SOYBN/4-191	I1KKK1.1 PF00227.24;Proteasome;	95.2	3.9e-95
TRINITY_DN16557_c0_g2	A0A067LF75_JATCU/187-283	A0A067LF75.1 PF00725.20;3HCDH;	91.8	2.6e-46
TRINITY_DN16558_c0_g1	A0A090MV87_STRRB/12-219	A0A090MV87.1 PF00596.19;Aldolase_II;	76.2	4.4e-10
TRINITY_DN16561_c0_g1	A0A022QN90_ERYGU/126-169	A0A022QN90.1 PF13639.4;zf-RING_2;	72.7	2.1e-12
TRINITY_DN16568_c0_g2	V4T950_9ROSI/152-190	V4T950.1 PF13923.4;zf-C3HC4_2;	89.7	4e-14
TRINITY_DN16570_c0_g1	A0A0D3FJ19_9ORYZ/40-83	A0A0D3FJ19.1 PF00076.20;RRM_1;	77.8	1.9e-09
TRINITY_DN16575_c0_g1	H2P9V3_PONAB/17-82	H2P9V3.1 PF01246.18;Ribosomal_L24e;	100	4.8e-32
TRINITY_DN16575_c0_g2	H2P9V3_PONAB/17-82	H2P9V3.1 PF01246.18;Ribosomal_L24e;	98.5	1.9e-31
TRINITY_DN16575_c0_g3	H2P9V3_PONAB/17-82	H2P9V3.1 PF01246.18;Ribosomal_L24e;	97	8.1e-31
TRINITY_DN16578_c0_g3	I3K6A8_ORENI/31-538	I3K6A8.1 PF00118.22;Cpn60_TCP1;	97.4	1.1e-34
TRINITY_DN16578_c0_g4	A0A0D9RJC0_CHLSB/28-535	A0A0D9RJC0.1 PF00118.22;Cpn60_TCP1;	98.3	4.6e-23
TRINITY_DN16579_c0_g1	W5KIR7_ASTMX/24-106	W5KIR7.1 PF07654.13;C1-set;	77.8	1.8e-32
TRINITY_DN16583_c1_g1	M5W340_PRUPE/33-256	M5W340.1 PF03767.12;Acid_phosphat_B;	71.8	2.8e-90
TRINITY_DN16590_c0_g1	A0A059DFJ8_EUCGR/85-167	A0A059DFJ8.1 PF03330.16;DPBB_1;	80.7	3.9e-35
TRINITY_DN16591_c0_g14	F1QJC9_DANRE/1210-1446	F1QJC9.1 PF01410.16;COLFI;	100	1.1e-138
TRINITY_DN16591_c0_g3	W5L8R7_ASTMX/33-88	W5L8R7.1 PF00093.16;VWC;	94.6	2.2e-27
TRINITY_DN16592_c0_g1	K1QZN1_CRAGI/1-259	K1QZN1.1 PF01201.20;Ribosomal_S8e;	77.3	1.5e-34
TRINITY_DN16597_c0_g2	A0A096SMD9_MAIZE/126-259	A0A096SMD9.1 PF09440.8;eIF3_N;	85.2	1.6e-24
TRINITY_DN16600_c0_g2	M1BNJ2_SOLTU/88-607	M1BNJ2.1 PF00920.19;ILVD_EDD;	88.4	5.9e-52
TRINITY_DN16600_c0_g3	A0A0J8CGA5_BETVU/90-609	A0A0J8CGA5.1 PF00920.19;ILVD_EDD;	88.7	1.2e-214
TRINITY_DN16602_c0_g1	J3N1B5_ORYBR/446-564	J3N1B5.1 PF00665.24;rve;	68.3	1.1e-08
TRINITY_DN16604_c0_g1	E7FFU1_DANRE/87-294	E7FFU1.1 PF01027.18;Bax1-I;	90.9	3.2e-92
TRINITY_DN16607_c0_g1	A0A072VWK2_MEDTR/74-179	A0A072VWK2.1 PF03912.12;Psb28;	89.6	1.4e-50
TRINITY_DN16609_c1_g1	M5X9N8_PRUPE/327-622	M5X9N8.1 PF03571.13;Peptidase_M49;	87.1	1.5e-62
TRINITY_DN16612_c0_g1	S9XXD8_9CETA/75-183	S9XXD8.1 PF03143.15;GTP_EFTU_D3;	92.3	7.3e-22
TRINITY_DN16614_c0_g1	A0A0D2QJ21_GOSRA/269-331	A0A0D2QJ21.1 PF13812.4;PPR_3;	87.8	7.1e-14
TRINITY_DN16614_c0_g2	A0A067HB90_CITSI/152-231	A0A067HB90.1 PF13812.4;PPR_3;	79.7	3.4e-18
TRINITY_DN16619_c0_g1	M1D268_SOLTU/97-439	M1D268.1 PF03016.13;Exostosin;	71.3	8.6e-159
TRINITY_DN16625_c0_g1	G1Q4U0_MYOLU/4-99	G1Q4U0.1 PF01158.16;Ribosomal_L36e;	88.5	5.6e-40
TRINITY_DN16625_c0_g2	G1Q4U0_MYOLU/4-99	G1Q4U0.1 PF01158.16;Ribosomal_L36e;	95.8	1.6e-43
TRINITY_DN16625_c0_g3	G1Q4U0_MYOLU/4-99	G1Q4U0.1 PF01158.16;Ribosomal_L36e;	90.2	1.9e-39
TRINITY_DN16626_c0_g1	A0A0D9XBR5_9ORYZ/8-144	A0A0D9XBR5.1 PF01090.17;Ribosomal_S19e;	95.6	1.7e-71
TRINITY_DN16628_c0_g3	L9KPA8_TUPCH/17-211	L9KPA8.1 PF00069.23;Pkinase;	100	6.1e-13
TRINITY_DN16631_c0_g1	Q5TKP3_ORYSJ/8-129	Q5TKP3.1 PF01778.15;Ribosomal_L28e;	99.2	8.3e-61
TRINITY_DN16634_c0_g2	M1CSA5_SOLTU/19-67	M1CSA5.1 PF00097.23;zf-C3HC4;	75.5	2.5e-18
TRINITY_DN16637_c0_g1	A0A061GJW6_THECC/31-218	A0A061GJW6.1 PF00227.24;Proteasome;	98.6	3.2e-36
TRINITY_DN16638_c2_g1	I1J7J5_SOYBN/43-187	I1J7J5.1 PF03018.12;Dirigent;	95.2	1.7e-75
TRINITY_DN16643_c0_g1	Q9FQ95_SOYBN/66-208	Q9FQ95.1 PF13410.4;GST_C_2;	79	6.1e-65
TRINITY_DN16653_c0_g2	A0A0B0NED9_GOSAR/50-118	A0A0B0NED9.1 PF00538.17;Linker_histone;	86.8	1.5e-25
TRINITY_DN16657_c0_g1	H2S7F0_TAKRU/5-104	H2S7F0.1 PF01247.16;Ribosomal_L35Ae;	90.5	5.8e-45
TRINITY_DN16657_c0_g2	H2S7F0_TAKRU/5-104	H2S7F0.1 PF01247.16;Ribosomal_L35Ae;	90.5	2.2e-44
TRINITY_DN16665_c0_g1	HS90B_DANRE/190-711	O57521.2 PF00183.16;HSP90;	97.4	9.2e-34
TRINITY_DN16668_c0_g2	A0A061GTH9_THECC/45-467	A0A061GTH9.1 PF03514.12;GRAS;	79.9	7.2e-193
TRINITY_DN16670_c0_g1	A0A022QGP9_ERYGU/107-157	A0A022QGP9.1 PF13920.4;zf-C3HC4_3;	80.4	3.8e-19
TRINITY_DN16672_c0_g1	B3IWG2_MEDTR/9-70	B3IWG2.1 PF00886.17;Ribosomal_S16;	98.4	2.3e-30
TRINITY_DN16675_c0_g1	C6SXG1_SOYBN/50-153	C6SXG1.1 PF00011.19;HSP20;	100	6.5e-07
TRINITY_DN16680_c0_g1	A0A061EIZ9_THECC/82-207	A0A061EIZ9.1 PF00583.23;Acetyltransf_1;	80.4	3.5e-14
TRINITY_DN16680_c0_g2	V4MPQ0_EUTSA/195-278	V4MPQ0.1 PF13673.5;Acetyltransf_10;	88.6	2e-35
TRINITY_DN16684_c0_g2	A0A022QFL4_ERYGU/124-245	A0A022QFL4.1 PF02657.13;SufE;	90.1	2.5e-54
TRINITY_DN16687_c0_g1	A0A0R4IYF1_DANRE/155-278	A0A0R4IYF1.1 PF00340.17;IL1;	65	9e-35
TRINITY_DN16690_c0_g1	D7SZY3_VITVI/168-217	D7SZY3.1 PF13041.4;PPR_2;	78.7	3.7e-14
TRINITY_DN16694_c0_g3	B9SL44_RICCO/273-365	B9SL44.1 PF13650.4;Asp_protease_2;	71.1	3.5e-23
TRINITY_DN16695_c1_g1	I1KP26_SOYBN/228-324	I1KP26.1 PF07109.9;Mg-por_mtran_C;	93.8	1.5e-45
TRINITY_DN16698_c0_g1	S8EBA9_9LAMI/82-199	S8EBA9.1 PF07766.11;LETM1;	90	6.7e-44
TRINITY_DN16699_c0_g1	A0A0D2RTA0_GOSRA/244-429	A0A0D2RTA0.1 PF02799.13;NMT_C;	88.2	1.4e-92
TRINITY_DN16700_c0_g1	Q6TH32_DANRE/11-149	Q6TH32.1 PF00241.18;Cofilin_ADF;	100	3.2e-75
TRINITY_DN16702_c0_g2	Q00M88_SOYBN/6-450	Q00M88.1 PF02458.13;Transferase;	100	8.9e-81
TRINITY_DN16705_c0_g1	V4SEI1_9ROSI/227-548	V4SEI1.1 PF00152.18;tRNA-synt_2;	83.3	2e-31
TRINITY_DN16708_c0_g1	A0A061DTA6_THECC/23-201	A0A061DTA6.1 PF01612.18;DNA_pol_A_exo1;	64.6	7.5e-31
TRINITY_DN16713_c0_g1	A0A0B0NSY3_GOSAR/73-128	A0A0B0NSY3.1 PF03909.15;BSD;	73.2	2.9e-16
TRINITY_DN16719_c0_g1	W9QLZ7_9ROSA/15-111	W9QLZ7.1 PF00071.20;Ras;	93.8	1.6e-07
TRINITY_DN16721_c0_g1	B9I5K2_POPTR/18-183	B9I5K2.2 PF06424.10;PRP1_N;	91.5	8e-22
TRINITY_DN16723_c0_g1	W9QDC3_9ROSA/5-149	W9QDC3.1 PF00407.17;Bet_v_1;	50.7	9.9e-32
TRINITY_DN16725_c0_g1	A5AGU0_VITVI/32-420	A5AGU0.1 PF06136.11;DUF966;	68.8	4.3e-139
TRINITY_DN16726_c0_g1	A0A0D2SYR1_GOSRA/21-55	A0A0D2SYR1.1 PF06747.11;CHCH;	94.3	9.8e-12
TRINITY_DN16730_c0_g1	A0A061DG46_THECC/245-285	A0A061DG46.1 PF13374.4;TPR_10;	80	2.2e-07
TRINITY_DN16733_c0_g3	A0A067K305_JATCU/38-397	A0A067K305.1 PF07690.14;MFS_1;	82	5.8e-35
TRINITY_DN16733_c0_g4	V4TE18_9ROSI/99-459	V4TE18.1 PF07690.14;MFS_1;	84.4	5.7e-30
TRINITY_DN16734_c1_g1	K4BZ53_SOLLC/130-310	K4BZ53.1 PF01758.14;SBF;	91.7	2.9e-86
TRINITY_DN16739_c0_g1	H2M9M0_ORYLA/86-356	H2M9M0.1 PF00956.16;NAP;	83.8	1.1e-126
TRINITY_DN16741_c0_g1	B9SLT5_RICCO/17-184	B9SLT5.1 PF09768.7;Peptidase_M76;	79.2	2.8e-80
TRINITY_DN16743_c0_g1	K4B947_SOLLC/75-914	K4B947.1 PF11145.6;DUF2921;	51	6.8e-222
TRINITY_DN16749_c0_g1	A0A067K4H6_JATCU/99-363	A0A067K4H6.1 PF00218.19;IGPS;	81.5	1.2e-123
TRINITY_DN16752_c0_g2	W5B1F1_WHEAT/427-511	W5B1F1.1 PF10589.7;NADH_4Fe-4S;	100	2.2e-06
TRINITY_DN16754_c0_g1	F8Q6P7_SERL3/707-939	F8Q6P7.1 PF00005.25;ABC_tran;	96.8	3.5e-47
TRINITY_DN16754_c0_g3	A0A0K6FWD0_9HOMO/702-934	A0A0K6FWD0.1 PF00005.25;ABC_tran;	99	3.6e-52
TRINITY_DN16754_c0_g4	V2WZG4_MONRO/711-943	V2WZG4.1 PF00005.25;ABC_tran;	100	6e-25
TRINITY_DN16755_c0_g2	B8A5H9_DANRE/1-98	B8A5H9.1 PF04360.10;Serglycin;	65.3	4.6e-27
TRINITY_DN16765_c0_g1	A0A022RGZ1_ERYGU/61-401	A0A022RGZ1.1 PF11955.6;PORR;	71.1	1.7e-133
TRINITY_DN16770_c0_g2	A0A061DXA1_THECC/161-357	A0A061DXA1.1 PF13532.4;2OG-FeII_Oxy_2;	84.3	9.8e-100
TRINITY_DN16771_c0_g1	K4B2Y6_SOLLC/57-214	K4B2Y6.1 PF04199.11;Cyclase;	84.2	5.9e-74
TRINITY_DN16773_c0_g1	A0A0K9NPQ5_ZOSMR/9-252	A0A0K9NPQ5.1 PF00069.23;Pkinase;	93.2	5.8e-32
TRINITY_DN16775_c0_g1	A0A0A0K4N5_CUCSA/5-142	A0A0A0K4N5.1 PF00179.24;UQ_con;	94.7	7.4e-70
TRINITY_DN16776_c1_g1	K7KGB4_SOYBN/92-168	K7KGB4.1 PF04969.14;CS;	100	5.2e-36
TRINITY_DN1677_c0_g1	A0A0E0AD03_9ORYZ/36-156	A0A0E0AD03.1 PF01597.17;GCV_H;	100	4.5e-36
TRINITY_DN16782_c0_g1	M1DVZ2_SOLTU/260-689	M1DVZ2.1 PF01593.22;Amino_oxidase;	84.3	5e-214
TRINITY_DN16783_c0_g2	Q0H1F2_DANRE/20-316	Q0H1F2.1 PF00069.23;Pkinase;	100	2.9e-57
TRINITY_DN16788_c0_g2	A0A0E0M1V2_ORYPU/211-245	A0A0E0M1V2.1 PF00046.27;Homeobox;	80	3.9e-06
TRINITY_DN16798_c0_g3	Q6PBJ9_DANRE/17-114	Q6PBJ9.1 PF00428.17;Ribosomal_60s;	98.1	8.8e-20
TRINITY_DN16798_c0_g4	A0A044TIV1_ONCVO/9-58	A0A044TIV1.1 PF01484.15;Col_cuticle_N;	53.1	1.5e-06
TRINITY_DN16801_c0_g1	D7SHS0_VITVI/53-184	D7SHS0.1 PF04695.11;Pex14_N;	66.1	5e-32
TRINITY_DN16803_c0_g1	V7BS99_PHAVU/6-142	V7BS99.1 PF01090.17;Ribosomal_S19e;	91.8	1.2e-67
TRINITY_DN16807_c0_g2	A0A078C9S1_BRANA/4-98	A0A078C9S1.1 PF14200.4;RicinB_lectin_2;	66.7	3.8e-07
TRINITY_DN16808_c0_g1	A0A059AJ33_EUCGR/146-266	A0A059AJ33.1 PF03171.18;2OG-FeII_Oxy;	60	9.4e-38
TRINITY_DN16812_c0_g2	C82A3_SOYBN/39-513	O49858.1 PF00067.20;p450;	98.6	1.7e-32
TRINITY_DN16816_c0_g2	W9S675_9ROSA/79-180	W9S675.1 PF00237.17;Ribosomal_L22;	89.2	6.7e-44
TRINITY_DN16818_c0_g1	M5WWE2_PRUPE/38-501	M5WWE2.1 PF00067.20;p450;	58.6	1.8e-163
TRINITY_DN16824_c1_g2	A0A061G188_THECC/93-145	A0A061G188.1 PF02861.18;Clp_N;	92.5	5.3e-18
TRINITY_DN16825_c0_g4	B3DH93_DANRE/15-156	B3DH93.1 PF00210.22;Ferritin;	92.9	4.2e-06
TRINITY_DN16827_c0_g1	K4BG40_SOLLC/69-198	K4BG40.1 PF00190.20;Cupin_1;	72	1.2e-23
TRINITY_DN16827_c0_g3	B9SWJ3_RICCO/29-166	B9SWJ3.1 PF09229.9;Aha1_N;	81.2	2.1e-59
TRINITY_DN16831_c0_g1	A0A0R4IW80_DANRE/112-177	A0A0R4IW80.1 PF00021.19;UPAR_LY6;	66.7	3e-19
TRINITY_DN16832_c1_g1	C6TGB8_SOYBN/86-376	C6TGB8.1 PF10250.7;O-FucT;	100	1e-38
TRINITY_DN16834_c0_g1	K4C7W6_SOLLC/196-364	K4C7W6.1 PF04862.10;DUF642;	80.9	1.7e-15
TRINITY_DN16839_c0_g1	M5XJU5_PRUPE/375-1143	M5XJU5.1 PF03552.12;Cellulose_synt;	92.2	1.9e-48
TRINITY_DN16840_c1_g1	L5JWI9_PTEAL/176-305	L5JWI9.1 PF00271.29;Helicase_C;	80	2.7e-20
TRINITY_DN16844_c0_g1	D3ZN79_RAT/7-63	D3ZN79.1 PF00831.21;Ribosomal_L29;	94.7	2.6e-18
TRINITY_DN16844_c0_g2	D3ZN79_RAT/7-63	D3ZN79.1 PF00831.21;Ribosomal_L29;	94.7	1.5e-18
TRINITY_DN16846_c0_g1	A0A022PYI1_ERYGU/97-213	A0A022PYI1.1 PF05773.20;RWD;	84.6	2.7e-50
TRINITY_DN16849_c0_g2	A0A061FH77_THECC/3-180	A0A061FH77.1 PF04752.10;ChaC;	66.9	9.9e-48
TRINITY_DN16851_c0_g1	A0A0D2V377_GOSRA/11-77	A0A0D2V377.1 PF11820.6;DUF3339;	89.6	1.9e-28
TRINITY_DN16854_c0_g1	A0A061EU05_THECC/8-104	A0A061EU05.1 PF10270.7;MMgT;	73.2	3.3e-36
TRINITY_DN16856_c0_g1	A0A022R114_ERYGU/15-143	A0A022R114.1 PF14108.4;DUF4281;	83.7	2.8e-58
TRINITY_DN16861_c0_g1	A9P8H3_POPTR/3-64	A9P8H3.1 PF01200.16;Ribosomal_S28e;	88.7	1.3e-23
TRINITY_DN16866_c0_g2	D8TIU0_VOLCA/393-438	D8TIU0.1 PF00400.30;WD40;	54.3	3e-07
TRINITY_DN16869_c0_g4	A0A0B0NK31_GOSAR/153-218	A0A0B0NK31.1 PF00226.29;DnaJ;	87.5	2.7e-23
TRINITY_DN16870_c0_g1	A0A067EWU4_CITSI/72-332	A0A067EWU4.1 PF00069.23;Pkinase;	77.6	3.3e-46
TRINITY_DN16872_c2_g1	F1QI08_DANRE/8-109	F1QI08.2 PF07686.15;V-set;	60.9	2.1e-21
TRINITY_DN16873_c0_g2	A0A022QFT0_ERYGU/192-241	A0A022QFT0.1 PF13041.4;PPR_2;	65.1	1.1e-08
TRINITY_DN16874_c0_g1	F6HXF8_VITVI/94-204	F6HXF8.1 PF00787.22;PX;	67.6	2.1e-34
TRINITY_DN16879_c0_g1	W5K2D5_ASTMX/7-143	W5K2D5.1 PF01090.17;Ribosomal_S19e;	93.3	1.5e-60
TRINITY_DN1687_c0_g1	B8B1R3_ORYSI/245-528	B8B1R3.1 PF12697.5;Abhydrolase_6;	100	1.2e-45
TRINITY_DN16884_c0_g1	A0A0D2SUB2_GOSRA/8-54	A0A0D2SUB2.1 PF00646.31;F-box;	65.2	7.3e-08
TRINITY_DN16886_c0_g1	S2K8K7_MUCC1/72-148	S2K8K7.1 PF03134.17;TB2_DP1_HVA22;	71.2	4.3e-23
TRINITY_DN16887_c0_g1	D7SUX1_VITVI/64-193	D7SUX1.1 PF04494.13;TFIID_NTD2;	87.7	5.7e-62
TRINITY_DN16888_c0_g2	M5X3S6_PRUPE/237-521	M5X3S6.1 PF00069.23;Pkinase;	87.7	8.7e-152
TRINITY_DN1688_c0_g1	G1M6P5_AILME/22-113	G1M6P5.1 PF00428.17;Ribosomal_60s;	98.9	2.4e-22
TRINITY_DN16890_c0_g1	A0A078CX38_BRANA/20-71	A0A078CX38.1 PF00847.18;AP2;	88.5	3e-20
TRINITY_DN16894_c0_g1	A0A022R272_ERYGU/13-161	A0A022R272.1 PF04535.10;DUF588;	57.4	2.1e-38
TRINITY_DN16895_c0_g1	Q6NXC1_DANRE/4-66	Q6NXC1.1 PF00076.20;RRM_1;	92.1	2.4e-26
TRINITY_DN16903_c0_g1	A0A022PSZ4_ERYGU/154-219	A0A022PSZ4.1 PF13499.4;EF-hand_7;	76.9	5.3e-23
TRINITY_DN16909_c0_g2	F6GVP2_VITVI/17-316	F6GVP2.1 PF14576.4;SEO_N;	53	2e-12
TRINITY_DN16918_c2_g2	F1QV31_DANRE/156-467	F1QV31.1 PF00038.19;Filament;	95	7.4e-21
TRINITY_DN16918_c2_g7	F7GDB5_CALJA/110-421	F7GDB5.1 PF00038.19;Filament;	93.4	2.8e-146
TRINITY_DN16919_c0_g1	Q9PVD9_DANRE/4-105	Q9PVD9.1 PF09307.8;MHC2-interact;	74.5	7.6e-32
TRINITY_DN16922_c0_g1	W9RXG1_9ROSA/1-78	W9RXG1.1 PF14223.4;Retrotran_gag_2;	71.8	1.3e-24
TRINITY_DN16922_c0_g5	Q8LNA0_ORYSJ/383-471	Q8LNA0.1 PF00665.24;rve;	72	9.7e-13
TRINITY_DN16923_c0_g1	A0A0K0DH79_ANGCA/4-320	A0A0K0DH79.1 PF00503.18;G-alpha;	91.8	7.4e-33
TRINITY_DN16926_c0_g1	K4C1S8_SOLLC/92-237	K4C1S8.1 PF00210.22;Ferritin;	79.5	2.2e-58
TRINITY_DN16932_c0_g1	A0A022RAW2_ERYGU/9-64	A0A022RAW2.1 PF04568.10;IATP;	69.1	4.5e-09
TRINITY_DN16933_c0_g1	A0A022QAW7_ERYGU/49-182	A0A022QAW7.1 PF03188.14;Cytochrom_B561;	59.7	2.6e-26
TRINITY_DN16941_c0_g1	D7TL09_VITVI/268-430	D7TL09.1 PF01554.16;MatE;	94	5e-17
TRINITY_DN16941_c0_g2	D7TL09_VITVI/47-207	D7TL09.1 PF01554.16;MatE;	84.5	1.1e-67
TRINITY_DN16950_c0_g2	I1L2Y7_SOYBN/66-446	I1L2Y7.1 PF00201.16;UDPGT;	91.1	4e-32
TRINITY_DN16957_c0_g2	G3RMM9_GORGO/11-151	G3RMM9.1 PF00241.18;Cofilin_ADF;	98.6	9.3e-73
TRINITY_DN16959_c3_g1	Q9LDJ5_SOLLC/284-483	Q9LDJ5.1 PF03441.12;FAD_binding_7;	80.7	4.9e-22
TRINITY_DN16968_c0_g5	W5NEN1_LEPOC/1685-1765	W5NEN1.1 PF00630.17;Filamin;	95.8	9.1e-34
TRINITY_DN16968_c0_g8	F1R9P5_DANRE/1768-1855	F1R9P5.2 PF00630.17;Filamin;	97.6	4.8e-43
TRINITY_DN16974_c0_g1	K4CNR4_SOLLC/32-110	K4CNR4.1 PF14144.4;DOG1;	81	2.1e-13
TRINITY_DN16975_c0_g2	A0A0B0MUJ2_GOSAR/1-163	A0A0B0MUJ2.1 PF05620.9;DUF788;	77.1	7.7e-37
TRINITY_DN16976_c0_g2	A0A0A0K8S0_CUCSA/14-92	A0A0A0K8S0.1 PF01423.20;LSM;	96.2	1.2e-34
TRINITY_DN16979_c0_g1	B9RSU9_RICCO/3-338	B9RSU9.1 PF01536.14;SAM_decarbox;	78.9	3.3e-50
TRINITY_DN16981_c0_g2	B9T7S8_RICCO/134-211	B9T7S8.1 PF02470.18;MlaD;	91	1.1e-31
TRINITY_DN16983_c0_g1	K4AZE3_SOLLC/95-277	K4AZE3.1 PF00069.23;Pkinase;	71.3	5.7e-65
TRINITY_DN16986_c0_g1	W9RSC1_9ROSA/44-143	W9RSC1.1 PF01627.21;Hpt;	50.5	2.8e-22
TRINITY_DN16989_c0_g2	K4CDU6_SOLLC/358-562	K4CDU6.1 PF12313.6;NPR1_like_C;	74.9	2.6e-76
TRINITY_DN16990_c0_g1	F6HGV5_VITVI/64-91	F6HGV5.1 PF08790.9;zf-LYAR;	85.7	3.9e-06
TRINITY_DN16992_c0_g1	A0A061FN77_THECC/25-210	A0A061FN77.1 PF01454.17;MAGE;	76.9	7.2e-78
TRINITY_DN16995_c0_g1	M5VQP0_PRUPE/107-159	M5VQP0.1 PF07985.10;SRR1;	83	1.8e-16
TRINITY_DN16999_c0_g8	G1PHQ0_MYOLU/70-419	G1PHQ0.1 PF00274.17;Glycolytic;	100	8.6e-26
TRINITY_DN17000_c0_g1	M0SYK0_MUSAM/171-380	M0SYK0.1 PF03360.14;Glyco_transf_43;	85.2	2.6e-104
TRINITY_DN17004_c0_g4	B7FGG8_MEDTR/190-230	B7FGG8.1 PF13639.4;zf-RING_2;	75.6	2.4e-12
TRINITY_DN17009_c0_g1	A0A0B0NFY6_GOSAR/89-377	A0A0B0NFY6.1 PF00291.23;PALP;	91.3	5.5e-147
TRINITY_DN17010_c0_g1	F6UYZ4_MONDO/3-146	F6UYZ4.2 PF01280.18;Ribosomal_L19e;	100	4.3e-73
TRINITY_DN17010_c0_g2	F6UYZ4_MONDO/3-146	F6UYZ4.2 PF01280.18;Ribosomal_L19e;	94.4	1.5e-70
TRINITY_DN17010_c0_g3	F6UYZ4_MONDO/3-146	F6UYZ4.2 PF01280.18;Ribosomal_L19e;	95.1	4.4e-35
TRINITY_DN17012_c0_g1	W5GNI4_WHEAT/104-183	W5GNI4.1 PF01282.17;Ribosomal_S24e;	93.8	4.8e-37
TRINITY_DN17016_c1_g1	F1QT60_DANRE/83-391	F1QT60.1 PF00038.19;Filament;	85.7	1.2e-38
TRINITY_DN17016_c1_g2	F1QT60_DANRE/83-391	F1QT60.1 PF00038.19;Filament;	90.3	7.1e-26
TRINITY_DN17016_c1_g3	F7BQY8_CALJA/102-410	F7BQY8.1 PF00038.19;Filament;	97.4	1.9e-100
TRINITY_DN17023_c0_g1	B3RPL6_TRIAD/15-135	B3RPL6.1 PF00238.17;Ribosomal_L14;	89.7	2.3e-44
TRINITY_DN17026_c1_g2	H2MYQ5_ORYLA/19-127	H2MYQ5.1 PF01776.15;Ribosomal_L22e;	98.2	1e-53
TRINITY_DN17026_c1_g6	J3LNN1_ORYBR/17-128	J3LNN1.1 PF01776.15;Ribosomal_L22e;	92.9	3.5e-52
TRINITY_DN17028_c0_g9	A0A061DNT9_THECC/68-182	A0A061DNT9.1 PF00665.24;rve;	71.7	3.1e-31
TRINITY_DN17033_c0_g1	A0A0R4ISV2_DANRE/28-83	A0A0R4ISV2.1 PF00048.18;IL8;	71.7	7.9e-15
TRINITY_DN17034_c0_g1	A0A061EIT6_THECC/25-320	A0A061EIT6.1 PF02668.14;TauD;	79.7	7.4e-143
TRINITY_DN17036_c0_g1	F1R7B3_DANRE/131-351	F1R7B3.1 PF00112.21;Peptidase_C1;	99.1	8.8e-64
TRINITY_DN17039_c0_g2	K4BML6_SOLLC/6-313	K4BML6.1 PF00389.28;2-Hacid_dh;	68.8	3.7e-121
TRINITY_DN17040_c0_g1	A0A067LFG0_JATCU/74-355	A0A067LFG0.1 PF00069.23;Pkinase;	81.3	2.2e-70
TRINITY_DN17042_c0_g3	A0A059CYB7_EUCGR/25-312	A0A059CYB7.1 PF14576.4;SEO_N;	58.3	1.5e-12
TRINITY_DN17044_c0_g2	A0A0D2R1W3_GOSRA/7-120	A0A0D2R1W3.1 PF05564.10;Auxin_repressed;	63.9	1.1e-28
TRINITY_DN17045_c0_g1	F6I489_VITVI/78-197	F6I489.1 PF00411.17;Ribosomal_S11;	75	1.2e-43
TRINITY_DN17046_c0_g2	A0A0R4ITA7_DANRE/10-61	A0A0R4ITA7.1 PF11261.6;IRF-2BP1_2;	100	8.8e-26
TRINITY_DN17048_c0_g2	B9S3J1_RICCO/49-239	B9S3J1.1 PF02115.15;Rho_GDI;	79.6	2.3e-82
TRINITY_DN17054_c0_g2	A0A022R8A3_ERYGU/87-156	A0A022R8A3.1 PF00076.20;RRM_1;	80	3.7e-25
TRINITY_DN17055_c0_g3	V7BWA9_PHAVU/17-160	V7BWA9.1 PF00071.20;Ras;	98.6	2.6e-32
TRINITY_DN17056_c0_g1	F6HHL3_VITVI/24-201	F6HHL3.1 PF00265.16;TK;	79.8	1.3e-80
TRINITY_DN17058_c0_g1	F1QC10_DANRE/62-305	F1QC10.1 PF00001.19;7tm_1;	88.9	1.3e-116
TRINITY_DN1705_c0_g1	HBA_DANRE/7-108	Q90487.3 PF00042.20;Globin;	75.9	1.4e-30
TRINITY_DN17062_c0_g1	M1AM29_SOLTU/306-364	M1AM29.1 PF03478.16;DUF295;	76.3	1.7e-17
TRINITY_DN17065_c0_g1	V4TB21_9ROSI/54-161	V4TB21.1 PF01655.16;Ribosomal_L32e;	92.6	4.6e-52
TRINITY_DN17068_c0_g1	A0A0D2LYF4_GOSRA/132-231	A0A0D2LYF4.1 PF00581.18;Rhodanese;	82	9.1e-44
TRINITY_DN17071_c0_g4	D7MHV2_ARALL/29-102	D7MHV2.1 PF07983.11;X8;	92.3	9.1e-07
TRINITY_DN17072_c0_g1	A0A0J8CFS9_BETVU/25-148	A0A0J8CFS9.1 PF01417.18;ENTH;	87.9	1.4e-59
TRINITY_DN17073_c0_g1	A0A059DIJ1_EUCGR/3-158	A0A059DIJ1.1 PF05983.9;Med7;	87.8	4.6e-73
TRINITY_DN17074_c0_g1	A0A0J8CAD1_BETVU/58-178	A0A0J8CAD1.1 PF14622.4;Ribonucleas_3_3;	69.2	1.7e-39
TRINITY_DN17079_c0_g1	A9P8H3_POPTR/3-64	A9P8H3.1 PF01200.16;Ribosomal_S28e;	83.9	3.3e-22
TRINITY_DN17080_c0_g1	K4BJV1_SOLLC/76-482	K4BJV1.1 PF04563.13;RNA_pol_Rpb2_1;	60	1.5e-141
TRINITY_DN17080_c0_g2	B9RNV9_RICCO/728-1100	B9RNV9.1 PF00562.26;RNA_pol_Rpb2_6;	86.6	4.1e-68
TRINITY_DN17084_c0_g1	D7TBV2_VITVI/9-78	D7TBV2.1 PF00076.20;RRM_1;	81.2	1.2e-25
TRINITY_DN17086_c1_g2	A0A0D2QWL1_GOSRA/20-121	A0A0D2QWL1.1 PF00071.20;Ras;	97.9	3.1e-46
TRINITY_DN17086_c1_g3	K7N2N0_SOYBN/17-89	K7N2N0.1 PF00071.20;Ras;	100	3.1e-17
TRINITY_DN17092_c0_g1	X1WBL9_DANRE/2141-2231	X1WBL9.1 PF13330.4;Mucin2_WxxW;	100	5.1e-31
TRINITY_DN17095_c0_g1	A0A0K9Q208_ZOSMR/407-497	A0A0K9Q208.1 PF03498.12;CDtoxinA;	60	4.5e-25
TRINITY_DN17095_c0_g2	W9R8D3_9ROSA/795-933	W9R8D3.1 PF04003.10;Utp12;	76.9	3.5e-45
TRINITY_DN17096_c0_g1	M5W4C9_PRUPE/143-287	M5W4C9.1 PF02576.15;DUF150;	70.3	4e-55
TRINITY_DN1709_c0_g1	A0A0D9W3F0_9ORYZ/28-79	A0A0D9W3F0.1 PF05047.14;L51_S25_CI-B8;	93.5	3.1e-19
TRINITY_DN17102_c0_g2	V4T6Q6_9ROSI/160-459	V4T6Q6.1 PF10236.7;DAP3;	74.7	2.6e-36
TRINITY_DN17102_c0_g3	A0A061GZ57_THECC/209-451	A0A061GZ57.1 PF10236.7;DAP3;	78	2.4e-44
TRINITY_DN17103_c0_g1	V4NX17_EUTSA/46-116	V4NX17.1 PF01480.15;PWI;	88.7	2.5e-28
TRINITY_DN17107_c0_g1	A0A067EHS6_CITSI/42-271	A0A067EHS6.1 PF05875.10;Ceramidase;	84.6	1.3e-114
TRINITY_DN17108_c0_g1	W5JXV9_ASTMX/19-192	W5JXV9.1 PF00656.20;Peptidase_C14;	70.5	3.1e-17
TRINITY_DN17110_c0_g1	A0A078H6Y6_BRANA/143-281	A0A078H6Y6.1 PF13589.4;HATPase_c_3;	79.1	2.6e-55
TRINITY_DN17114_c1_g1	F6H418_VITVI/90-144	F6H418.1 PF01667.15;Ribosomal_S27e;	94.9	7.9e-14
TRINITY_DN17117_c0_g1	A0A067E268_CITSI/1069-1127	A0A067E268.1 PF14599.4;zinc_ribbon_6;	87.9	1.4e-12
TRINITY_DN17119_c0_g1	Q107R6_PHAVU/11-231	Q107R6.1 PF00230.18;MIP;	90.5	9.7e-106
TRINITY_DN17120_c0_g1	A0A0A0KFJ8_CUCSA/906-1017	A0A0A0KFJ8.1 PF09111.8;SLIDE;	97.3	2.3e-58
TRINITY_DN17124_c0_g2	I1K4R0_SOYBN/125-184	I1K4R0.1 PF01159.17;Ribosomal_L6e;	100	1.9e-22
TRINITY_DN17124_c0_g3	I1K4R0_SOYBN/1-60	I1K4R0.1 PF03868.13;Ribosomal_L6e_N;	100	2.2e-27
TRINITY_DN17129_c0_g1	F6HDI6_VITVI/603-812	F6HDI6.1 PF11926.6;DUF3444;	56.5	6.6e-60
TRINITY_DN17130_c0_g2	W9SEH1_9ROSA/8-199	W9SEH1.1 PF04511.13;DER1;	83.8	1.2e-85
TRINITY_DN17132_c0_g1	A0A022Q7H9_ERYGU/52-111	A0A022Q7H9.1 PF00076.20;RRM_1;	75.9	2.5e-16
TRINITY_DN17134_c0_g1	A0A0J8FBN8_BETVU/50-113	A0A0J8FBN8.1 PF17136.2;ribosomal_L24;	95.2	3.1e-28
TRINITY_DN17135_c1_g9	A0A061DUY3_THECC/24-346	A0A061DUY3.1 PF00332.16;Glyco_hydro_17;	72.7	2.4e-138
TRINITY_DN17136_c0_g1	F6H2K0_VITVI/64-361	F6H2K0.1 PF00294.22;PfkB;	80.9	2.9e-134
TRINITY_DN17137_c0_g1	U5GT04_POPTR/12-70	U5GT04.1 PF09138.9;Urm1;	84.4	3.1e-14
TRINITY_DN17144_c1_g1	A0A059CJE6_EUCGR/5-240	A0A059CJE6.1 PF00743.17;FMO-like;	65.5	1e-14
TRINITY_DN17145_c1_g3	A0A022PUB5_ERYGU/36-175	A0A022PUB5.1 PF01909.21;NTP_transf_2;	71.9	1.1e-50
TRINITY_DN17146_c0_g1	W9SAX0_9ROSA/78-296	W9SAX0.1 PF02167.13;Cytochrom_C1;	93.6	4.4e-74
TRINITY_DN17148_c0_g1	A0A0A0LL55_CUCSA/141-278	A0A0A0LL55.1 PF17207.1;MCM_OB;	97	1e-08
TRINITY_DN17148_c0_g2	A0A022QW43_ERYGU/318-650	A0A022QW43.1 PF00493.21;MCM;	86.2	2.3e-159
TRINITY_DN17150_c0_g2	K3W4L3_MOUSE/61-98	K3W4L3.1 PF05184.13;SapB_1;	94.7	4.8e-14
TRINITY_DN17151_c0_g1	S8D957_9LAMI/1-190	S8D957.1 PF00827.15;Ribosomal_L15e;	89.7	3.6e-50
TRINITY_DN17151_c0_g10	W5MIL4_LEPOC/2-191	W5MIL4.1 PF00827.15;Ribosomal_L15e;	95	2.2e-63
TRINITY_DN17151_c0_g2	W5MIL4_LEPOC/2-191	W5MIL4.1 PF00827.15;Ribosomal_L15e;	95.7	5.8e-89
TRINITY_DN17151_c0_g3	W5MIL4_LEPOC/2-191	W5MIL4.1 PF00827.15;Ribosomal_L15e;	95.3	1.2e-67
TRINITY_DN17151_c0_g4	K7K4Z1_SOYBN/6-143	K7K4Z1.1 PF00827.15;Ribosomal_L15e;	100	6.7e-37
TRINITY_DN17151_c0_g5	A0A0E0PJZ3_ORYRU/2-201	A0A0E0PJZ3.1 PF00827.15;Ribosomal_L15e;	90.6	2.8e-76
TRINITY_DN17151_c0_g6	A0A0D3DMA4_BRAOL/2-191	A0A0D3DMA4.1 PF00827.15;Ribosomal_L15e;	94.1	3.9e-49
TRINITY_DN17151_c0_g7	A0A067JF26_JATCU/2-191	A0A067JF26.1 PF00827.15;Ribosomal_L15e;	60.9	3.8e-65
TRINITY_DN17151_c0_g8	A0A067JF26_JATCU/2-191	A0A067JF26.1 PF00827.15;Ribosomal_L15e;	91.5	1.8e-97
TRINITY_DN17151_c0_g9	W5MIL4_LEPOC/2-191	W5MIL4.1 PF00827.15;Ribosomal_L15e;	96.7	5.3e-84
TRINITY_DN17154_c0_g1	A0A091E4J7_FUKDA/2-128	A0A091E4J7.1 PF04045.12;P34-Arc;	81.8	2.4e-17
TRINITY_DN17154_c0_g2	Q6P2T5_DANRE/57-284	Q6P2T5.1 PF04045.12;P34-Arc;	100	2.3e-25
TRINITY_DN17155_c0_g1	M1D699_SOLTU/41-278	M1D699.1 PF00481.19;PP2C;	78.2	1.6e-89
TRINITY_DN17161_c0_g6	A0A061G281_THECC/450-603	A0A061G281.1 PF17177.2;PPR_long;	27.7	1e-08
TRINITY_DN17163_c0_g2	A0A0J8EK35_BETVU/299-522	A0A0J8EK35.1 PF00667.18;FAD_binding_1;	84.4	1.3e-107
TRINITY_DN17163_c0_g4	F6GXH0_VITVI/298-522	F6GXH0.1 PF00667.18;FAD_binding_1;	84.6	3.2e-61
TRINITY_DN17164_c2_g3	F6HIT9_VITVI/372-574	F6HIT9.1 PF12313.6;NPR1_like_C;	74.4	2.4e-78
TRINITY_DN17164_c2_g5	B9GT05_POPTR/55-225	B9GT05.2 PF00651.29;BTB;	64.2	3.9e-58
TRINITY_DN17165_c1_g3	A0A087GWV2_ARAAL/161-296	A0A087GWV2.1 PF05843.12;Suf;	66	2.2e-30
TRINITY_DN17168_c0_g2	C6TMB5_SOYBN/75-144	C6TMB5.1 PF00298.17;Ribosomal_L11;	100	9.7e-17
TRINITY_DN17168_c0_g3	A0A0D2QTE0_GOSRA/31-120	A0A0D2QTE0.1 PF00298.17;Ribosomal_L11;	71.9	1e-35
TRINITY_DN17170_c0_g1	V4SES7_9ROSI/27-274	V4SES7.1 PF00141.21;peroxidase;	73.1	2.1e-99
TRINITY_DN17171_c0_g1	U5GCL0_POPTR/15-132	U5GCL0.1 PF06094.10;GGACT;	69.5	4.1e-42
TRINITY_DN17173_c0_g1	A0A0E0AHA3_9ORYZ/38-154	A0A0E0AHA3.1 PF00234.20;Tryp_alpha_amyl;	98.3	4.3e-65
TRINITY_DN17173_c0_g3	A0A0E0Q5M2_ORYRU/10-123	A0A0E0Q5M2.1 PF00234.20;Tryp_alpha_amyl;	96.5	1.2e-61
TRINITY_DN17174_c0_g1	C5YN52_SORBI/67-149	C5YN52.1 PF05699.12;Dimer_Tnp_hAT;	57.3	6.1e-17
TRINITY_DN17175_c0_g1	B9R867_RICCO/80-165	B9R867.1 PF00575.21;S1;	67.4	7e-26
TRINITY_DN17176_c0_g1	A0A087GFD9_ARAAL/51-148	A0A087GFD9.1 PF03980.12;Nnf1;	65.9	3.4e-24
TRINITY_DN17184_c0_g1	W5KJJ8_ASTMX/111-137	W5KJJ8.1 PF00642.22;zf-CCCH;	96.3	2e-08
TRINITY_DN17185_c0_g2	H9G3Z1_ANOCA/1-480	H9G3Z1.2 PF00118.22;Cpn60_TCP1;	96.6	2.5e-62
TRINITY_DN17186_c0_g1	A0A022QV82_ERYGU/2-151	A0A022QV82.1 PF00407.17;Bet_v_1;	60.1	7.2e-50
TRINITY_DN17188_c0_g1	V4UJW6_9ROSI/213-333	V4UJW6.1 PF14833.4;NAD_binding_11;	90.9	1.9e-56
TRINITY_DN17190_c0_g1	F1QFV6_DANRE/6-121	F1QFV6.1 PF01778.15;Ribosomal_L28e;	99.1	8.2e-55
TRINITY_DN17191_c0_g1	K4CRN6_SOLLC/235-279	K4CRN6.1 PF14237.4;DUF4339;	97.8	2.4e-20
TRINITY_DN17193_c0_g1	D7TJC6_VITVI/29-364	D7TJC6.1 PF12819.5;Malectin_like;	67.2	8.9e-64
TRINITY_DN17196_c0_g1	A5BTQ3_VITVI/31-490	A5BTQ3.1 PF00759.17;Glyco_hydro_9;	96	3.3e-52
TRINITY_DN17197_c0_g1	M5XCZ3_PRUPE/12-63	M5XCZ3.1 PF00249.29;Myb_DNA-binding;	90.2	8.3e-19
TRINITY_DN17202_c1_g2	Q803Q7_DANRE/15-364	Q803Q7.1 PF00274.17;Glycolytic;	98.6	1.4e-34
TRINITY_DN17204_c2_g1	D7SW77_VITVI/761-979	D7SW77.1 PF13725.4;tRNA_bind_2;	65.3	2.4e-06
TRINITY_DN17205_c0_g1	G7J3U5_MEDTR/29-154	G7J3U5.1 PF01477.21;PLAT;	77.8	3.7e-56
TRINITY_DN17206_c0_g1	A0A061GG20_THECC/420-566	A0A061GG20.1 PF01699.22;Na_Ca_ex;	55.8	7.8e-32
TRINITY_DN17207_c0_g1	L5MEY5_MYODS/26-121	L5MEY5.1 PF03501.13;S10_plectin;	95.5	5.5e-44
TRINITY_DN17207_c0_g2	L5MEY5_MYODS/26-121	L5MEY5.1 PF03501.13;S10_plectin;	95.7	3.6e-46
TRINITY_DN17208_c0_g1	M4AHJ8_XIPMA/43-128	M4AHJ8.1 PF00203.19;Ribosomal_S19;	97.7	6.6e-39
TRINITY_DN17214_c0_g1	M5XH56_PRUPE/20-99	M5XH56.1 PF04241.13;DUF423;	88.8	7.2e-36
TRINITY_DN17216_c0_g1	A0A022PQM3_ERYGU/521-631	A0A022PQM3.1 PF01751.20;Toprim;	91.9	2.4e-51
TRINITY_DN17216_c0_g3	A0A059DH02_EUCGR/44-194	A0A059DH02.1 PF02518.24;HATPase_c;	86.8	1.4e-70
TRINITY_DN17218_c0_g7	F6H6Q6_VITVI/265-453	F6H6Q6.1 PF00201.16;UDPGT;	71.6	6.5e-28
TRINITY_DN17219_c0_g1	H2L7Q5_ORYLA/1-119	H2L7Q5.1 PF00833.16;Ribosomal_S17e;	92.4	3.3e-55
TRINITY_DN17219_c0_g2	H2L7Q5_ORYLA/1-119	H2L7Q5.1 PF00833.16;Ribosomal_S17e;	91.6	3.7e-56
TRINITY_DN17219_c0_g3	H2L7Q5_ORYLA/1-119	H2L7Q5.1 PF00833.16;Ribosomal_S17e;	93.2	9.6e-56
TRINITY_DN17220_c1_g1	B9SYI5_RICCO/234-388	B9SYI5.1 PF01764.23;Lipase_3;	77.6	5.6e-20
TRINITY_DN17220_c1_g2	K7L5U6_SOYBN/215-364	K7L5U6.1 PF01764.23;Lipase_3;	82	4.9e-18
TRINITY_DN17221_c0_g2	A0A059CDU3_EUCGR/431-668	A0A059CDU3.1 PF04811.13;Sec23_trunk;	86.6	1.8e-116
TRINITY_DN17226_c0_g2	A0A067F124_CITSI/23-293	A0A067F124.1 PF01193.22;RNA_pol_L;	84.2	1.2e-124
TRINITY_DN17226_c0_g3	F6HVR3_VITVI/698-816	F6HVR3.1 PF13355.4;DUF4101;	73.9	6.9e-46
TRINITY_DN17227_c0_g2	Q6TGT9_DANRE/6-68	Q6TGT9.1 PF00076.20;RRM_1;	96.8	3.8e-28
TRINITY_DN17228_c0_g1	A0A067G2R2_CITSI/179-293	A0A067G2R2.1 PF13012.4;MitMem_reg;	92.2	1.6e-53
TRINITY_DN17229_c0_g1	K7K8J7_SOYBN/51-101	K7K8J7.1 PF06825.10;HSBP1;	84.4	7.5e-06
TRINITY_DN17234_c0_g1	A0A0D3D024_BRAOL/6-59	A0A0D3D024.1 PF13920.4;zf-C3HC4_3;	77.4	2.7e-20
TRINITY_DN17235_c0_g2	M1D253_SOLTU/36-129	M1D253.1 PF13905.4;Thioredoxin_8;	37.1	6.8e-08
TRINITY_DN17243_c1_g3	B9REG0_RICCO/2-191	B9REG0.1 PF03721.12;UDPG_MGDP_dh_N;	94.2	1.2e-95
TRINITY_DN17243_c1_g4	V7CI16_PHAVU/2-193	V7CI16.1 PF03721.12;UDPG_MGDP_dh_N;	95.9	6.9e-31
TRINITY_DN17243_c1_g5	J3LSZ8_ORYBR/329-453	J3LSZ8.1 PF03720.13;UDPG_MGDP_dh_C;	100	1.5e-35
TRINITY_DN17243_c1_g6	A0A0D9ZDE4_9ORYZ/9-97	A0A0D9ZDE4.1 PF00984.17;UDPG_MGDP_dh;	100	5.2e-09
TRINITY_DN17244_c0_g1	I3ITB4_DANRE/315-378	I3ITB4.1 PF00076.20;RRM_1;	94.5	8.7e-21
TRINITY_DN17245_c0_g1	K4BSS7_SOLLC/23-360	K4BSS7.1 PF00443.27;UCH;	90.8	5.7e-175
TRINITY_DN17248_c0_g2	K4AMD1_SETIT/14-357	K4AMD1.1 PF01070.16;FMN_dh;	93.6	1.2e-178
TRINITY_DN17249_c0_g1	A0A0E0KYN0_ORYPU/2-188	A0A0E0KYN0.1 PF17135.2;Ribosomal_L18;	98.4	1.9e-97
TRINITY_DN17249_c0_g5	A0A0D2SIQ8_GOSRA/42-227	A0A0D2SIQ8.1 PF17135.2;Ribosomal_L18;	88.7	3.4e-90
TRINITY_DN17249_c0_g6	I1JR91_SOYBN/2-143	I1JR91.1 PF17135.2;Ribosomal_L18;	97.1	8e-29
TRINITY_DN17249_c0_g8	A0A0D2SIQ8_GOSRA/42-227	A0A0D2SIQ8.1 PF17135.2;Ribosomal_L18;	97	6.3e-31
TRINITY_DN17250_c0_g1	F6HRB9_VITVI/151-351	F6HRB9.1 PF01786.15;AOX;	91	1e-102
TRINITY_DN17251_c0_g2	A0A061GDI8_THECC/236-296	A0A061GDI8.1 PF12906.5;RINGv;	75.4	2.4e-19
TRINITY_DN17252_c0_g1	K7L262_SOYBN/39-189	K7L262.1 PF02383.16;Syja_N;	93.4	7.6e-26
TRINITY_DN17253_c0_g2	A0A061DFZ9_THECC/22-189	A0A061DFZ9.1 PF03345.12;DDOST_48kD;	83.3	8.3e-10
TRINITY_DN17256_c0_g1	B9S5J4_RICCO/59-295	B9S5J4.1 PF00006.23;ATP-synt_ab;	100	1.4e-08
TRINITY_DN17257_c0_g1	A0A067JC65_JATCU/170-277	A0A067JC65.1 PF00651.29;BTB;	71.2	6.5e-36
TRINITY_DN17259_c1_g2	M0TFX7_MUSAM/109-181	M0TFX7.1 PF00076.20;RRM_1;	90.9	5.1e-28
TRINITY_DN17259_c1_g3	A0A022RYU0_ERYGU/12-83	A0A022RYU0.1 PF00076.20;RRM_1;	94.4	1.3e-30
TRINITY_DN17259_c1_g6	A0A022RYU0_ERYGU/12-83	A0A022RYU0.1 PF00076.20;RRM_1;	95.8	5.5e-31
TRINITY_DN17259_c1_g7	A0A067LLW8_JATCU/161-226	A0A067LLW8.1 PF00076.20;RRM_1;	84.8	1.1e-25
TRINITY_DN1725_c0_g1	F1QFH3_DANRE/27-397	F1QFH3.2 PF07156.12;Prenylcys_lyase;	81.1	2.1e-27
TRINITY_DN17260_c0_g2	A0A061E7U9_THECC/8-123	A0A061E7U9.1 PF15341.4;SLX9;	73.7	7.1e-37
TRINITY_DN17261_c0_g1	K4C6C8_SOLLC/2-409	K4C6C8.1 PF03348.13;Serinc;	73.9	2.5e-78
TRINITY_DN17261_c0_g2	A0A022RXY2_ERYGU/27-434	A0A022RXY2.1 PF03348.13;Serinc;	83.3	3.7e-43
TRINITY_DN17262_c2_g1	A0A0E0N6G4_ORYRU/11-358	A0A0E0N6G4.1 PF00274.17;Glycolytic;	100	6.1e-52
TRINITY_DN17266_c0_g1	I3J7W3_ORENI/152-242	I3J7W3.1 PF07654.13;C1-set;	63.7	6.8e-25
TRINITY_DN17266_c1_g1	F1R2L7_DANRE/175-261	F1R2L7.2 PF07654.13;C1-set;	73.3	1.3e-25
TRINITY_DN17266_c1_g2	F1R2L7_DANRE/175-261	F1R2L7.2 PF07654.13;C1-set;	72.1	3.5e-25
TRINITY_DN17266_c1_g3	F1QAA3_DANRE/17-104	F1QAA3.1 PF07654.13;C1-set;	81.8	4.5e-20
TRINITY_DN17267_c0_g1	V4VIS9_9ROSI/106-213	V4VIS9.1 PF01764.23;Lipase_3;	72	2.4e-38
TRINITY_DN17269_c0_g1	M0SD68_MUSAM/3-68	M0SD68.1 PF01246.18;Ribosomal_L24e;	93.9	2.8e-29
TRINITY_DN17270_c0_g1	A0A0D2RGG4_GOSRA/44-97	A0A0D2RGG4.1 PF05605.10;zf-Di19;	75	1.2e-18
TRINITY_DN17272_c0_g1	K3XY68_SETIT/169-238	K3XY68.1 PF00076.20;RRM_1;	87.1	1.5e-06
TRINITY_DN17275_c0_g1	K4D7Y6_SOLLC/409-754	K4D7Y6.1 PF00493.21;MCM;	90.5	9.1e-174
TRINITY_DN17276_c0_g1	Q7XK85_ORYSJ/634-748	Q7XK85.2 PF00665.24;rve;	45.8	2.3e-14
TRINITY_DN17276_c0_g6	C5YDT1_SORBI/541-655	C5YDT1.1 PF00665.24;rve;	48.8	1.5e-13
TRINITY_DN17278_c0_g1	V4UPU4_9ROSI/3-81	V4UPU4.1 PF01777.16;Ribosomal_L27e;	64.4	1e-12
TRINITY_DN17278_c0_g2	A0A096T4D3_MAIZE/82-167	A0A096T4D3.1 PF01777.16;Ribosomal_L27e;	88.4	2.5e-35
TRINITY_DN17279_c0_g1	A0A067K1E9_JATCU/12-106	A0A067K1E9.1 PF14368.4;LTP_2;	41.3	1.7e-15
TRINITY_DN17280_c0_g3	Q6NYA1_DANRE/131-199	Q6NYA1.1 PF00076.20;RRM_1;	100	5.2e-33
TRINITY_DN17280_c0_g5	F8W5P8_DANRE/71-140	F8W5P8.1 PF00076.20;RRM_1;	100	5.8e-34
TRINITY_DN17281_c0_g1	M1BKB2_SOLTU/14-61	M1BKB2.1 PF00249.29;Myb_DNA-binding;	89.6	1.3e-20
TRINITY_DN17282_c0_g8	A0A022PYF0_ERYGU/174-218	A0A022PYF0.1 PF13639.4;zf-RING_2;	72.7	1.6e-13
TRINITY_DN17282_c0_g9	A0A022QTF7_ERYGU/128-320	A0A022QTF7.1 PF00544.17;Pec_lyase_C;	100	3.7e-11
TRINITY_DN17283_c0_g2	A4HNZ5_LEIBR/231-361	A4HNZ5.1 PF00004.27;AAA;	96.8	7.1e-09
TRINITY_DN17283_c1_g1	W2QZZ8_PHYPN/236-366	W2QZZ8.1 PF00004.27;AAA;	88.1	5.4e-32
TRINITY_DN17283_c1_g2	M5WCV6_PRUPE/670-900	M5WCV6.1 PF01434.16;Peptidase_M41;	83	1.8e-109
TRINITY_DN17283_c1_g3	W9RN76_9ROSA/53-234	W9RN76.1 PF09439.8;SRPRB;	77.2	9.4e-74
TRINITY_DN17284_c0_g1	A0A072VM41_MEDTR/122-235	A0A072VM41.1 PF03479.13;DUF296;	87.6	2.1e-47
TRINITY_DN17290_c0_g1	F6HVE8_VITVI/352-687	F6HVE8.1 PF04869.12;Uso1_p115_head;	93.8	1.2e-35
TRINITY_DN17291_c4_g1	A0A0J8C144_BETVU/921-1191	A0A0J8C144.1 PF00069.23;Pkinase;	70.3	8.5e-39
TRINITY_DN17293_c0_g1	A0A061EIH6_THECC/146-196	A0A061EIH6.1 PF00010.24;HLH;	90.2	4.2e-18
TRINITY_DN17296_c0_g1	M1BKX0_SOLTU/81-588	M1BKX0.1 PF03141.14;Methyltransf_29;	78.9	5.4e-108
TRINITY_DN17297_c0_g1	M0ZVN7_SOLTU/1-285	M0ZVN7.1 PF06217.10;GAGA_bind;	56.7	8.2e-66
TRINITY_DN17297_c0_g6	S8D210_9LAMI/248-435	S8D210.1 PF01928.19;CYTH;	75.3	4.5e-78
TRINITY_DN17297_c0_g7	M1BF81_SOLTU/106-234	M1BF81.1 PF00782.18;DSPc;	79.7	9.6e-59
TRINITY_DN17298_c0_g1	A0A022S277_ERYGU/25-353	A0A022S277.1 PF00933.19;Glyco_hydro_3;	78.7	4.1e-154
TRINITY_DN17299_c0_g2	A0A0B0NSD0_GOSAR/160-424	A0A0B0NSD0.1 PF05705.12;DUF829;	80.4	4.1e-44
TRINITY_DN17300_c0_g1	V4SMJ3_9ROSI/2-188	V4SMJ3.1 PF03194.13;LUC7;	85.1	8.9e-49
TRINITY_DN17301_c0_g1	Q6K2I3_ORYSJ/105-175	Q6K2I3.1 PF12819.5;Malectin_like;	97.8	1.2e-19
TRINITY_DN17301_c0_g3	Q6K2I3_ORYSJ/3-112	Q6K2I3.1 PF12819.5;Malectin_like;	100	8.8e-36
TRINITY_DN17301_c1_g3	F6H2B3_VITVI/445-716	F6H2B3.1 PF07714.15;Pkinase_Tyr;	70.1	3e-59
TRINITY_DN17303_c0_g1	C6TFW4_SOYBN/1-154	C6TFW4.1 PF00407.17;Bet_v_1;	98.7	1.1e-80
TRINITY_DN17305_c0_g1	A0A022R7B7_ERYGU/68-346	A0A022R7B7.1 PF15264.4;TSSC4;	40.8	7.7e-30
TRINITY_DN17306_c0_g1	W9SAJ4_9ROSA/8-226	W9SAJ4.1 PF00141.21;peroxidase;	87.7	3.8e-110
TRINITY_DN17308_c0_g1	M5XDD5_PRUPE/37-464	M5XDD5.1 PF00067.20;p450;	75.9	1e-195
TRINITY_DN17310_c1_g2	W5PSW9_SHEEP/97-234	W5PSW9.1 PF03947.16;Ribosomal_L2_C;	99.2	6.3e-70
TRINITY_DN17310_c1_g4	A0A0N5AYM7_9BILA/11-90	A0A0N5AYM7.1 PF00181.21;Ribosomal_L2;	83.1	6.2e-30
TRINITY_DN17313_c0_g1	M5XAB8_PRUPE/51-139	M5XAB8.1 PF13837.4;Myb_DNA-bind_4;	84.3	1.4e-35
TRINITY_DN17316_c0_g3	A0A0K9Q3G7_ZOSMR/2-54	A0A0K9Q3G7.1 PF01907.17;Ribosomal_L37e;	94.3	1.2e-22
TRINITY_DN17317_c0_g1	A0A0D3HTL1_9ORYZ/15-221	A0A0D3HTL1.1 PF01015.16;Ribosomal_S3Ae;	98.6	7.8e-111
TRINITY_DN17317_c0_g3	C4J988_MAIZE/15-175	C4J988.1 PF01015.16;Ribosomal_S3Ae;	100	4.1e-43
TRINITY_DN17318_c0_g1	A0A061DTP5_THECC/36-268	A0A061DTP5.1 PF00182.17;Glyco_hydro_19;	83.3	5.7e-120
TRINITY_DN17320_c0_g1	G3P1S2_GASAC/24-102	G3P1S2.1 PF01282.17;Ribosomal_S24e;	92.4	7.9e-36
TRINITY_DN17320_c0_g2	L9JB67_TUPCH/58-136	L9JB67.1 PF01282.17;Ribosomal_S24e;	93.7	6.3e-37
TRINITY_DN17321_c0_g1	A0A067KNI7_JATCU/57-247	A0A067KNI7.1 PF02115.15;Rho_GDI;	83.5	3.2e-82
TRINITY_DN17322_c0_g2	A0A0P7UH33_9TELE/3-126	A0A0P7UH33.1 PF01775.15;Ribosomal_L18A;	96	1.3e-64
TRINITY_DN17322_c0_g3	RL18A_BOVIN/7-130	Q3T003.1 PF01775.15;Ribosomal_L18A;	100	5.7e-66
TRINITY_DN17323_c0_g1	S8DX37_9LAMI/13-71	S8DX37.1 PF10172.7;DDA1;	80	4.3e-18
TRINITY_DN17325_c0_g1	G1NZD3_MYOLU/16-125	G1NZD3.1 PF01248.24;Ribosomal_L7Ae;	88.4	5.6e-48
TRINITY_DN17326_c0_g2	K4C538_SOLLC/153-382	K4C538.1 PF00078.25;RVT_1;	45.5	1.7e-07
TRINITY_DN17328_c0_g3	A0A022PP77_ERYGU/364-1086	A0A022PP77.1 PF03552.12;Cellulose_synt;	89.1	2e-260
TRINITY_DN17330_c0_g1	W5LFK6_ASTMX/90-233	W5LFK6.1 PF08702.8;Fib_alpha;	60.9	1.2e-33
TRINITY_DN17333_c2_g14	K7LGY7_SOYBN/8-82	K7LGY7.1 PF07765.10;KIP1;	75.3	1.9e-26
TRINITY_DN17333_c2_g15	D7TQR0_VITVI/11-206	D7TQR0.1 PF04511.13;DER1;	75	1e-80
TRINITY_DN17333_c2_g2	A0A072VJC1_MEDTR/487-814	A0A072VJC1.1 PF01504.16;PIP5K;	82.4	2.4e-33
TRINITY_DN17335_c0_g1	F1QJY7_DANRE/30-134	F1QJY7.1 PF00047.23;ig;	72.3	2.5e-31
TRINITY_DN17335_c0_g2	U5G906_POPTR/665-717	U5G906.1 PF09465.8;LBR_tudor;	57.1	4.3e-09
TRINITY_DN17337_c0_g1	F6GV15_VITVI/206-342	F6GV15.1 PF02469.20;Fasciclin;	71.5	2.6e-50
TRINITY_DN17339_c0_g1	F6HI81_VITVI/55-155	F6HI81.1 PF12796.5;Ank_2;	38.8	1.5e-06
TRINITY_DN17344_c0_g1	M0ZTI0_SOLTU/1-103	M0ZTI0.1 PF00179.24;UQ_con;	68.9	2.4e-19
TRINITY_DN17344_c0_g2	A0A0J8C9Z0_BETVU/1-134	A0A0J8C9Z0.1 PF00179.24;UQ_con;	72.6	1.1e-18
TRINITY_DN17346_c0_g1	C6T3G1_SOYBN/55-217	C6T3G1.1 PF04387.12;PTPLA;	80.4	3.1e-71
TRINITY_DN17347_c0_g1	G3H5C9_CRIGR/28-82	G3H5C9.1 PF01667.15;Ribosomal_S27e;	98.2	4.3e-25
TRINITY_DN17347_c0_g2	G3H5C9_CRIGR/28-82	G3H5C9.1 PF01667.15;Ribosomal_S27e;	98.2	3.5e-25
TRINITY_DN17347_c0_g3	G3H5C9_CRIGR/28-82	G3H5C9.1 PF01667.15;Ribosomal_S27e;	98.2	3.4e-25
TRINITY_DN17348_c0_g1	M4A244_XIPMA/36-289	M4A244.1 PF00702.24;Hydrolase;	94.4	7.7e-95
TRINITY_DN17349_c2_g1	A0A061DW16_THECC/542-613	A0A061DW16.1 PF13976.4;gag_pre-integrs;	49.3	9.5e-11
TRINITY_DN17349_c2_g2	K4BH35_SOLLC/671-788	K4BH35.1 PF00665.24;rve;	44.7	1.2e-15
TRINITY_DN17352_c0_g1	M5XPH3_PRUPE/206-273	M5XPH3.1 PF03909.15;BSD;	68.1	8.1e-18
TRINITY_DN17353_c1_g4	B9S819_RICCO/36-474	B9S819.1 PF00450.20;Peptidase_S10;	60.9	2.7e-27
TRINITY_DN17358_c0_g1	M5VPA7_PRUPE/35-274	M5VPA7.1 PF00481.19;PP2C;	84.2	7.4e-75
TRINITY_DN17361_c0_g2	A0A059DHN1_EUCGR/277-306	A0A059DHN1.1 PF00641.16;zf-RanBP;	90	9.4e-09
TRINITY_DN17362_c0_g1	K4CEE8_SOLLC/38-472	K4CEE8.1 PF00067.20;p450;	64.1	2.8e-166
TRINITY_DN17363_c0_g2	A0A059BLB6_EUCGR/19-97	A0A059BLB6.1 PF03134.17;TB2_DP1_HVA22;	92.4	4.3e-38
TRINITY_DN17367_c0_g1	A0A059CEA2_EUCGR/34-231	A0A059CEA2.1 PF05757.9;PsbQ;	83.8	4.7e-33
TRINITY_DN17368_c0_g2	M5XTM3_PRUPE/43-230	M5XTM3.1 PF04669.11;Polysacc_synt_4;	73.9	2.1e-79
TRINITY_DN17370_c0_g1	A0A022R2Y6_ERYGU/49-92	A0A022R2Y6.1 PF01476.18;LysM;	74.4	1.9e-12
TRINITY_DN17373_c0_g1	B9RZK8_RICCO/29-64	B9RZK8.1 PF00320.25;GATA;	100	2.6e-11
TRINITY_DN17374_c0_g8	A0A061DVA9_THECC/64-236	A0A061DVA9.1 PF00213.16;OSCP;	82.2	2.5e-37
TRINITY_DN17375_c0_g3	A0A061DJY1_THECC/37-147	A0A061DJY1.1 PF06881.9;Elongin_A;	64	4.9e-34
TRINITY_DN17376_c0_g1	D7T937_VITVI/24-285	D7T937.1 PF02265.14;S1-P1_nuclease;	79.5	2.8e-126
TRINITY_DN17376_c0_g3	M5XGM9_PRUPE/79-199	M5XGM9.1 PF13279.4;4HBT_2;	86	9.6e-56
TRINITY_DN17380_c0_g1	G7JIJ7_MEDTR/166-395	G7JIJ7.1 PF01798.16;Nop;	97	7.6e-65
TRINITY_DN17380_c0_g3	A0A0D3FIG6_9ORYZ/233-463	A0A0D3FIG6.1 PF01798.16;Nop;	100	8e-34
TRINITY_DN17380_c1_g1	A0A061F080_THECC/36-252	A0A061F080.1 PF01138.19;RNase_PH;	63.2	2.9e-50
TRINITY_DN17383_c0_g1	A0A022R0G4_ERYGU/153-261	A0A022R0G4.1 PF00651.29;BTB;	88.1	3.6e-46
TRINITY_DN17385_c0_g1	A0A022RJR1_ERYGU/88-116	A0A022RJR1.1 PF08265.9;YL1_C;	89.7	4.5e-07
TRINITY_DN17387_c0_g1	A0A061FHU9_THECC/48-135	A0A061FHU9.1 PF05768.12;DUF836;	75.8	2.6e-33
TRINITY_DN17388_c0_g1	W9QGQ5_9ROSA/59-204	W9QGQ5.1 PF00190.20;Cupin_1;	76.6	3.2e-59
TRINITY_DN17390_c0_g1	B9GGU4_POPTR/36-214	B9GGU4.1 PF08787.9;Alginate_lyase2;	66.5	4.2e-72
TRINITY_DN17391_c0_g1	A0A067GPA3_CITSI/31-464	A0A067GPA3.1 PF00450.20;Peptidase_S10;	58.9	1.2e-148
TRINITY_DN17392_c0_g1	K4C7M6_SOLLC/20-84	K4C7M6.1 PF01918.19;Alba;	90.8	7.4e-24
TRINITY_DN17392_c1_g4	K4C7M6_SOLLC/20-84	K4C7M6.1 PF01918.19;Alba;	90.8	9.2e-25
TRINITY_DN17393_c0_g2	A0A0J8CFU4_BETVU/35-213	A0A0J8CFU4.1 PF02779.22;Transket_pyr;	94.3	5.8e-52
TRINITY_DN17393_c1_g1	A0A0K9PF29_ZOSMR/241-363	A0A0K9PF29.1 PF02780.18;Transketolase_C;	93	4.7e-29
TRINITY_DN17394_c0_g1	A9PCP1_POPTR/17-143	A9PCP1.1 PF00179.24;UQ_con;	96.5	2.9e-61
TRINITY_DN17398_c0_g3	V7C390_PHAVU/48-146	V7C390.1 PF08551.8;DUF1751;	81.6	9.3e-31
TRINITY_DN17402_c1_g1	K7KPK5_SOYBN/187-236	K7KPK5.1 PF00010.24;HLH;	78	1.6e-13
TRINITY_DN17402_c1_g2	A0A061FCG2_THECC/51-119	A0A061FCG2.1 PF05498.9;RALF;	78.9	5.8e-25
TRINITY_DN17402_c1_g3	B9GGH2_POPTR/91-218	B9GGH2.2 PF04852.10;DUF640;	89.5	6.3e-55
TRINITY_DN17404_c0_g1	A0A067GTQ5_CITSI/159-393	A0A067GTQ5.1 PF07714.15;Pkinase_Tyr;	92.1	8.3e-63
TRINITY_DN17405_c0_g1	A0A096NG97_PAPAN/18-159	A0A096NG97.1 PF00210.22;Ferritin;	99.3	1.2e-75
TRINITY_DN17405_c0_g2	Q9DDT0_DANRE/14-155	Q9DDT0.1 PF00210.22;Ferritin;	97.9	6.5e-74
TRINITY_DN17410_c1_g4	D7SLG2_VITVI/12-497	D7SLG2.1 PF04188.11;Mannosyl_trans2;	61.4	9.3e-167
TRINITY_DN17411_c0_g1	A0A022RWY3_ERYGU/484-731	A0A022RWY3.1 PF00702.24;Hydrolase;	76.3	3.9e-102
TRINITY_DN17412_c0_g3	A0A0D2S6L2_GOSRA/5-86	A0A0D2S6L2.1 PF00179.24;UQ_con;	80.7	7.1e-20
TRINITY_DN17412_c0_g4	A0A0E0JQC5_ORYPU/19-124	A0A0E0JQC5.1 PF00179.24;UQ_con;	97.3	1.3e-35
TRINITY_DN17412_c0_g7	J3MGD4_ORYBR/24-592	J3MGD4.1 PF11443.6;DUF2828;	52.9	1.6e-10
TRINITY_DN17414_c0_g1	M5WZ32_PRUPE/79-187	M5WZ32.1 PF01491.14;Frataxin_Cyay;	78	5.5e-47
TRINITY_DN17414_c0_g2	M5WZ32_PRUPE/79-187	M5WZ32.1 PF01491.14;Frataxin_Cyay;	76.1	1.6e-44
TRINITY_DN17415_c0_g1	A0A0D2QQK1_GOSRA/140-210	A0A0D2QQK1.1 PF00690.24;Cation_ATPase_N;	71.8	1.7e-23
TRINITY_DN17415_c0_g2	S8DUT9_9LAMI/32-76	S8DUT9.1 PF12515.6;CaATP_NAI;	90.9	2.4e-14
TRINITY_DN17417_c0_g1	M5XN21_PRUPE/99-248	M5XN21.1 PF01569.19;PAP2;	88.2	5.9e-56
TRINITY_DN17418_c0_g1	A0A0J8CC40_BETVU/119-296	A0A0J8CC40.1 PF00297.20;Ribosomal_L3;	77.1	1.7e-37
TRINITY_DN17419_c0_g1	T1G5M3_HELRO/18-99	T1G5M3.1 PF15511.4;CENP-T_C;	96.4	1e-22
TRINITY_DN17419_c1_g3	A0A0D2SH67_GOSRA/1-95	A0A0D2SH67.1 PF07777.9;MFMR;	73.7	1.1e-33
TRINITY_DN17421_c0_g1	D7UC44_VITVI/8-371	D7UC44.1 PF01112.16;Asparaginase_2;	40	6.2e-66
TRINITY_DN17421_c0_g2	K4C109_SOLLC/15-352	K4C109.1 PF01112.16;Asparaginase_2;	86.3	2.8e-39
TRINITY_DN17422_c1_g1	A0A096RKH2_MAIZE/28-145	A0A096RKH2.1 PF00411.17;Ribosomal_S11;	96.2	2.2e-34
TRINITY_DN17422_c1_g3	G1PYK6_MYOLU/29-147	G1PYK6.1 PF00411.17;Ribosomal_S11;	94.9	2e-57
TRINITY_DN17422_c1_g5	G1PYK6_MYOLU/29-147	G1PYK6.1 PF00411.17;Ribosomal_S11;	94.7	2.8e-55
TRINITY_DN17424_c0_g1	A0A022RXL7_ERYGU/90-501	A0A022RXL7.1 PF01603.18;B56;	87.6	3.5e-213
TRINITY_DN17426_c0_g1	A0A0J8CHZ1_BETVU/14-415	A0A0J8CHZ1.1 PF06068.11;TIP49;	90.8	1.5e-204
TRINITY_DN17427_c0_g1	W9QQR2_9ROSA/487-993	W9QQR2.1 PF00899.19;ThiF;	85.9	1e-71
TRINITY_DN17428_c0_g2	A0A022Q4M3_ERYGU/105-348	A0A022Q4M3.1 PF04414.10;tRNA_deacylase;	46.1	1.4e-49
TRINITY_DN17429_c1_g2	D7U090_VITVI/87-233	D7U090.1 PF00675.18;Peptidase_M16;	78.9	1.8e-59
TRINITY_DN17429_c1_g5	A0A015L652_9GLOM/107-175	A0A015L652.1 PF00505.17;HMG_box;	100	4.6e-21
TRINITY_DN17430_c0_g3	U5FUB2_POPTR/1-181	U5FUB2.1 PF14009.4;DUF4228;	55.8	5.6e-45
TRINITY_DN17430_c0_g5	F6HQW4_VITVI/210-253	F6HQW4.1 PF13639.4;zf-RING_2;	88.4	2.6e-18
TRINITY_DN17430_c0_g6	A0A022QM39_ERYGU/27-135	A0A022QM39.1 PF04398.10;DUF538;	72.2	1.2e-40
TRINITY_DN17433_c0_g1	A0A067JJS4_JATCU/41-327	A0A067JJS4.1 PF00149.26;Metallophos;	58.5	4.3e-85
TRINITY_DN17434_c0_g1	H2NEP2_PONAB/105-188	H2NEP2.1 PF00189.18;Ribosomal_S3_C;	100	9.8e-40
TRINITY_DN17435_c0_g1	D7T2X8_VITVI/68-218	D7T2X8.1 PF00588.17;SpoU_methylase;	90.1	1.7e-76
TRINITY_DN17437_c0_g3	W9RCI8_9ROSA/61-461	W9RCI8.1 PF00155.19;Aminotran_1_2;	88.3	6.8e-214
TRINITY_DN17438_c0_g1	X1WGW1_DANRE/25-274	X1WGW1.1 PF00001.19;7tm_1;	91.2	5.1e-130
TRINITY_DN17448_c2_g1	B9MW97_POPTR/2-76	B9MW97.1 PF02519.12;Auxin_inducible;	65.7	6.5e-16
TRINITY_DN17449_c0_g3	A0A061GQP8_THECC/29-121	A0A061GQP8.1 PF13499.4;EF-hand_7;	92.4	1.5e-41
TRINITY_DN17449_c0_g4	K4D0B0_SOLLC/499-668	K4D0B0.1 PF13359.4;DDE_Tnp_4;	70.3	2.3e-55
TRINITY_DN17449_c0_g5	F6HLW8_VITVI/776-982	F6HLW8.1 PF03522.13;SLC12;	79.4	2.5e-22
TRINITY_DN1744_c0_g1	A0A0M3HES0_PANTR/23-289	A0A0M3HES0.1 PF00361.18;Proton_antipo_M;	88.2	2.2e-76
TRINITY_DN17450_c1_g1	U5GTQ6_POPTR/215-324	U5GTQ6.1 PF00954.18;S_locus_glycop;	41.3	2.9e-08
TRINITY_DN17451_c3_g1	M5W4R9_PRUPE/13-238	M5W4R9.1 PF00244.18;14-3-3;	89.4	4.8e-109
TRINITY_DN17451_c3_g2	Q6R2P7_SOLTU/11-235	Q6R2P7.1 PF00244.18;14-3-3;	87.4	4.4e-77
TRINITY_DN17451_c3_g5	M4A3W7_XIPMA/9-229	M4A3W7.1 PF00244.18;14-3-3;	100	3.4e-29
TRINITY_DN17452_c1_g3	F4JM86_ARATH/18-399	F4JM86.1 PF00199.17;Catalase;	94	2.5e-222
TRINITY_DN17453_c0_g2	A0A067K115_JATCU/104-248	A0A067K115.1 PF01694.20;Rhomboid;	59.3	1.6e-38
TRINITY_DN17455_c0_g1	A0A0J8B800_BETVU/608-724	A0A0J8B800.1 PF00665.24;rve;	45.3	2.1e-15
TRINITY_DN17457_c2_g1	V4RWI9_9ROSI/221-290	V4RWI9.1 PF00076.20;RRM_1;	81.4	4.6e-26
TRINITY_DN17458_c1_g2	F6HXM8_VITVI/38-99	F6HXM8.1 PF07647.15;SAM_2;	83.9	1.4e-23
TRINITY_DN17458_c1_g3	F6HXM8_VITVI/38-99	F6HXM8.1 PF07647.15;SAM_2;	72.9	1.3e-18
TRINITY_DN17459_c0_g1	K4D052_SOLLC/76-194	K4D052.1 PF01641.16;SelR;	90.9	1.5e-52
TRINITY_DN17462_c0_g1	A0A0D2W0R2_GOSRA/257-457	A0A0D2W0R2.1 PF00201.16;UDPGT;	60.3	2.6e-65
TRINITY_DN17463_c0_g1	F6H1T2_VITVI/323-372	F6H1T2.1 PF13041.4;PPR_2;	71.4	1.9e-13
TRINITY_DN17464_c0_g1	A0A022Q9Z6_ERYGU/25-400	A0A022Q9Z6.1 PF03676.12;UPF0183;	85.9	1.1e-197
TRINITY_DN17466_c0_g1	A0A022Q132_ERYGU/34-163	A0A022Q132.1 PF04934.12;Med6;	94.9	2.5e-34
TRINITY_DN17467_c0_g1	A0A061FIP8_THECC/96-172	A0A061FIP8.1 PF11523.6;DUF3223;	83.1	5e-33
TRINITY_DN17468_c0_g1	A0A0D2T0C7_GOSRA/2-59	A0A0D2T0C7.1 PF00403.24;HMA;	76	5.6e-14
TRINITY_DN17468_c0_g2	A0A0D2T0C7_GOSRA/2-59	A0A0D2T0C7.1 PF00403.24;HMA;	83.6	1e-19
TRINITY_DN17474_c0_g1	I1NCY1_SOYBN/135-366	I1NCY1.2 PF00891.16;Methyltransf_2;	100	2.2e-44
TRINITY_DN17475_c0_g1	F6I4L0_VITVI/189-270	F6I4L0.1 PF10497.7;zf-4CXXC_R1;	74.1	1.7e-31
TRINITY_DN17476_c0_g1	U5FWJ7_POPTR/139-319	U5FWJ7.1 PF17177.2;PPR_long;	39.7	9.4e-07
TRINITY_DN17477_c0_g1	F6H2N2_VITVI/683-1023	F6H2N2.1 PF01208.15;URO-D;	86.8	6.1e-176
TRINITY_DN17480_c0_g5	B9S5J4_RICCO/59-295	B9S5J4.1 PF00006.23;ATP-synt_ab;	94.7	5.5e-33
TRINITY_DN17480_c0_g7	B9S5J4_RICCO/59-295	B9S5J4.1 PF00006.23;ATP-synt_ab;	100	1e-54
TRINITY_DN17485_c0_g1	H2A5_ORYSJ/9-104	Q94E96.1 PF00125.22;Histone;	100	3.4e-33
TRINITY_DN17486_c0_g1	A0A022RC91_ERYGU/41-187	A0A022RC91.1 PF01936.16;NYN;	98	3e-78
TRINITY_DN17488_c0_g1	M4EHS4_BRARP/57-153	M4EHS4.1 PF07876.10;Dabb;	67.7	3.7e-30
TRINITY_DN17491_c0_g2	A0A0P7VS56_9TELE/127-240	A0A0P7VS56.1 PF07742.10;BTG;	91.8	1.4e-33
TRINITY_DN17491_c0_g6	F6GZ13_VITVI/157-559	F6GZ13.1 PF01384.18;PHO4;	83.8	3.6e-33
TRINITY_DN17492_c0_g1	A0A022QH94_ERYGU/5-149	A0A022QH94.1 PF00134.21;Cyclin_N;	85.5	3.4e-67
TRINITY_DN17494_c2_g3	K4B9I5_SOLLC/342-408	K4B9I5.1 PF08276.9;PAN_2;	52.1	2.2e-08
TRINITY_DN17496_c0_g1	A0A059AP80_EUCGR/64-193	A0A059AP80.1 PF04628.11;Sedlin_N;	92.1	4.4e-64
TRINITY_DN17497_c0_g1	M5XKH5_PRUPE/412-751	M5XKH5.1 PF13243.4;SQHop_cyclase_C;	84.5	5.6e-44
TRINITY_DN17498_c0_g1	H2QBR4_PANTR/8-187	H2QBR4.1 PF01294.16;Ribosomal_L13e;	99	6.2e-49
TRINITY_DN17498_c0_g2	RL13_DANRE/8-187	Q90Z10.3 PF01294.16;Ribosomal_L13e;	100	9.3e-79
TRINITY_DN17498_c0_g3	RL13_DANRE/8-187	Q90Z10.3 PF01294.16;Ribosomal_L13e;	92.8	1.4e-84
TRINITY_DN17501_c0_g6	M4A3S6_XIPMA/348-412	M4A3S6.1 PF00313.20;CSD;	98.5	1.1e-28
TRINITY_DN17502_c0_g1	A0A0D2PNT4_GOSRA/262-398	A0A0D2PNT4.1 PF04146.13;YTH;	94.9	3.6e-72
TRINITY_DN17502_c0_g5	R0GL75_9BRAS/17-342	R0GL75.1 PF00009.25;GTP_EFTU;	94.2	4.6e-73
TRINITY_DN17507_c0_g1	B9I9S4_POPTR/4-181	B9I9S4.2 PF09420.8;Nop16;	74.2	7.4e-68
TRINITY_DN17508_c1_g1	A0A078C8N4_BRANA/112-159	A0A078C8N4.1 PF01466.17;Skp1;	83.3	3e-16
TRINITY_DN17510_c0_g1	A0A0A0KRP5_CUCSA/112-207	A0A0A0KRP5.1 PF01248.24;Ribosomal_L7Ae;	95.8	2.8e-44
TRINITY_DN17512_c0_g1	I1MZC1_SOYBN/304-468	I1MZC1.2 PF08662.9;eIF2A;	89.7	6.6e-85
TRINITY_DN17514_c0_g4	I1L3P6_SOYBN/31-526	I1L3P6.1 PF00118.22;Cpn60_TCP1;	98.7	4.8e-35
TRINITY_DN17514_c0_g5	V4M009_EUTSA/31-527	V4M009.1 PF00118.22;Cpn60_TCP1;	94.1	1.5e-96
TRINITY_DN17515_c1_g1	D7LEF8_ARALL/144-287	D7LEF8.1 PF00388.17;PI-PLC-X;	88.7	1.1e-21
TRINITY_DN17517_c0_g1	A0A022RIE9_ERYGU/72-344	A0A022RIE9.1 PF00487.22;FA_desaturase;	57.9	1.9e-90
TRINITY_DN17518_c0_g1	D7TCC6_VITVI/13-81	D7TCC6.1 PF01423.20;LSM;	91.4	7.2e-23
TRINITY_DN17518_c0_g2	I3T3Z8_MEDTR/4-81	I3T3Z8.1 PF00646.31;F-box;	56.8	6.5e-15
TRINITY_DN17520_c0_g1	A0A061H074_THECC/12-106	A0A061H074.1 PF01248.24;Ribosomal_L7Ae;	93.7	4.5e-46
TRINITY_DN17521_c1_g1	V4VFG8_9ROSI/32-274	V4VFG8.1 PF03634.11;TCP;	63.7	4.2e-64
TRINITY_DN17521_c2_g1	B9SVD1_RICCO/43-315	B9SVD1.1 PF00069.23;Pkinase;	65.2	1e-73
TRINITY_DN17525_c0_g1	A0A0D9VUG1_9ORYZ/15-125	A0A0D9VUG1.1 PF01655.16;Ribosomal_L32e;	93.7	7.7e-53
TRINITY_DN17527_c0_g1	A0A067RJX8_ZOONE/86-150	A0A067RJX8.1 PF13499.4;EF-hand_7;	56.9	3.9e-14
TRINITY_DN17527_c0_g4	B0WJZ3_CULQU/85-125	B0WJZ3.1 PF00400.30;WD40;	92.7	5.3e-16
TRINITY_DN17527_c0_g8	H0WQN1_OTOGA/258-298	H0WQN1.1 PF00400.30;WD40;	95	4.7e-16
TRINITY_DN17529_c0_g1	A0A022Q8M0_ERYGU/243-535	A0A022Q8M0.1 PF13839.4;PC-Esterase;	86.1	5.8e-157
TRINITY_DN17529_c0_g3	M5X644_PRUPE/18-662	M5X644.1 PF03999.10;MAP65_ASE1;	73.3	1.7e-169
TRINITY_DN17530_c0_g1	W5G990_WHEAT/14-95	W5G990.1 PF01198.17;Ribosomal_L31e;	93.9	2.1e-37
TRINITY_DN17530_c1_g1	B7Z4C8_HUMAN/19-100	B7Z4C8.1 PF01198.17;Ribosomal_L31e;	92.7	1.2e-37
TRINITY_DN17530_c1_g2	B7Z4C8_HUMAN/19-100	B7Z4C8.1 PF01198.17;Ribosomal_L31e;	92.3	3.9e-20
TRINITY_DN17530_c2_g1	B8BM32_ORYSI/6-55	B8BM32.1 PF00253.19;Ribosomal_S14;	100	2e-24
TRINITY_DN17533_c0_g1	A0A072TYM4_MEDTR/115-210	A0A072TYM4.1 PF01248.24;Ribosomal_L7Ae;	92.7	1.1e-43
TRINITY_DN17534_c0_g1	D7TJF6_VITVI/3-126	D7TJF6.1 PF07047.10;OPA3;	83.1	5.8e-48
TRINITY_DN17536_c0_g2	M5Y4E1_PRUPE/10-146	M5Y4E1.1 PF10358.7;NT-C2;	83.9	2.1e-62
TRINITY_DN17538_c0_g2	D7T3I2_VITVI/76-296	D7T3I2.1 PF04720.10;PDDEXK_6;	78.7	1.2e-35
TRINITY_DN17540_c0_g1	A0A061E601_THECC/171-438	A0A061E601.1 PF04104.12;DNA_primase_lrg;	87.3	9e-139
TRINITY_DN17541_c0_g1	M1CPB9_SOLTU/86-358	M1CPB9.1 PF03006.18;HlyIII;	72.9	9.4e-78
TRINITY_DN17541_c1_g2	V4WG04_9ROSI/21-100	V4WG04.1 PF14438.4;SM-ATX;	68.8	1e-21
TRINITY_DN17541_c2_g1	A0A061GRY3_THECC/37-473	A0A061GRY3.1 PF00067.20;p450;	80.3	3.7e-216
TRINITY_DN17541_c2_g2	I1JNL8_SOYBN/154-204	I1JNL8.1 PF13920.4;zf-C3HC4_3;	92.2	7.1e-25
TRINITY_DN17542_c0_g1	A0A061DTQ5_THECC/223-395	A0A061DTQ5.1 PF03357.19;Snf7;	60.7	1.1e-45
TRINITY_DN17543_c0_g3	L8WTD2_THACA/337-615	L8WTD2.1 PF00702.24;Hydrolase;	97.8	3.7e-45
TRINITY_DN17544_c0_g1	A0A022RP46_ERYGU/3-96	A0A022RP46.1 PF06127.9;DUF962;	81.9	1.2e-44
TRINITY_DN17545_c0_g1	A0A067JVK5_JATCU/345-496	A0A067JVK5.1 PF04937.13;DUF659;	69.1	1.7e-55
TRINITY_DN17546_c0_g1	A0A067JWX6_JATCU/43-301	A0A067JWX6.1 PF00149.26;Metallophos;	76.4	1.6e-113
TRINITY_DN17547_c0_g1	D7TAF5_VITVI/73-156	D7TAF5.1 PF07962.10;Swi3;	81.7	3.8e-35
TRINITY_DN17548_c0_g3	V4SYH6_9ROSI/120-487	V4SYH6.1 PF03372.21;Exo_endo_phos;	64.2	3.1e-126
TRINITY_DN17549_c0_g1	V7ASV6_PHAVU/29-276	V7ASV6.1 PF01370.19;Epimerase;	71.7	2.3e-110
TRINITY_DN17549_c0_g2	V7ASV6_PHAVU/29-276	V7ASV6.1 PF01370.19;Epimerase;	71.3	5.7e-110
TRINITY_DN1754_c0_g1	I1NKP2_ORYGL/330-368	I1NKP2.1 PF00614.20;PLDc;	100	2.9e-15
TRINITY_DN17552_c0_g1	A0A0B0MC29_GOSAR/152-199	A0A0B0MC29.1 PF00010.24;HLH;	93.8	4.3e-15
TRINITY_DN17554_c0_g1	D7TT76_VITVI/248-334	D7TT76.1 PF02135.14;zf-TAZ;	78.2	2.4e-38
TRINITY_DN17558_c0_g1	M5X0K4_PRUPE/53-481	M5X0K4.1 PF12222.6;PNGaseA;	70.9	2e-180
TRINITY_DN17562_c0_g2	M7ZDX9_TRIUA/203-420	M7ZDX9.1 PF00091.23;Tubulin;	71.9	9.2e-06
TRINITY_DN17563_c0_g1	M0UAW6_MUSAM/742-785	M0UAW6.1 PF13639.4;zf-RING_2;	88.6	5.4e-18
TRINITY_DN17564_c0_g2	M5XFV0_PRUPE/179-298	M5XFV0.1 PF01575.17;MaoC_dehydratas;	81.4	4.1e-52
TRINITY_DN17564_c0_g8	A0A072U617_MEDTR/29-125	A0A072U617.1 PF13456.4;RVT_3;	35.9	9.2e-07
TRINITY_DN17570_c0_g2	A0A067EJH1_CITSI/406-622	A0A067EJH1.1 PF00198.21;2-oxoacid_dh;	86.7	4.6e-63
TRINITY_DN17572_c0_g1	D6BRE6_JATCU/1-131	D6BRE6.1 PF00235.17;Profilin;	89.8	1.2e-38
TRINITY_DN17574_c0_g2	A0A022R0X2_ERYGU/54-422	A0A022R0X2.1 PF05292.9;MCD;	75.5	2.4e-164
TRINITY_DN17575_c0_g11	K4B0Y8_SOLLC/52-114	K4B0Y8.1 PF05498.9;RALF;	84.1	1.1e-23
TRINITY_DN17575_c0_g7	K7K8J7_SOYBN/51-101	K7K8J7.1 PF06825.10;HSBP1;	78.4	5.3e-06
TRINITY_DN17578_c1_g6	Q7XWL9_ORYSJ/1099-1236	Q7XWL9.1 PF00078.25;RVT_1;	59.1	9.5e-16
TRINITY_DN17579_c0_g1	L8Y8J0_TUPCH/17-180	L8Y8J0.1 PF00149.26;Metallophos;	71.2	3.1e-17
TRINITY_DN17582_c0_g1	B9GV12_POPTR/149-193	B9GV12.1 PF13639.4;zf-RING_2;	88.9	2.9e-18
TRINITY_DN17583_c0_g1	U5FVR2_POPTR/83-209	U5FVR2.1 PF05697.11;Trigger_N;	71.8	3e-42
TRINITY_DN17585_c0_g1	RL27_BOVIN/52-136	P61356.2 PF01777.16;Ribosomal_L27e;	95.9	5.5e-31
TRINITY_DN17585_c0_g2	RL27_BOVIN/52-136	P61356.2 PF01777.16;Ribosomal_L27e;	100	3.1e-37
TRINITY_DN17588_c0_g1	A0A0A0L506_CUCSA/39-233	A0A0A0L506.1 PF00106.23;adh_short;	78.5	9.8e-82
TRINITY_DN17589_c1_g1	K4D9Y0_SOLLC/165-295	K4D9Y0.1 PF00004.27;AAA;	92.1	8.6e-45
TRINITY_DN17589_c1_g2	K4D9Y0_SOLLC/165-295	K4D9Y0.1 PF00004.27;AAA;	95.4	5.5e-64
TRINITY_DN17590_c0_g1	V4SGR7_9ROSI/31-248	V4SGR7.1 PF00314.15;Thaumatin;	75.5	1.3e-99
TRINITY_DN17591_c1_g1	A0A072TX74_MEDTR/5-165	A0A072TX74.1 PF07039.9;DUF1325;	73.2	2.8e-62
TRINITY_DN17592_c1_g5	F6HHG2_VITVI/150-378	F6HHG2.1 PF00687.19;Ribosomal_L1;	85.4	2.1e-35
TRINITY_DN17594_c0_g1	A0A022QAS7_ERYGU/158-368	A0A022QAS7.1 PF01852.17;START;	89.6	2.7e-101
TRINITY_DN17596_c3_g4	M1BT07_SOLTU/2-156	M1BT07.1 PF01300.16;Sua5_yciO_yrdC;	84.7	1.5e-46
TRINITY_DN17598_c1_g1	A0A067KZ23_JATCU/872-976	A0A067KZ23.1 PF02373.20;JmjC;	86	1.3e-48
TRINITY_DN17600_c0_g1	H9H7J0_MONDO/585-641	H9H7J0.2 PF01849.16;NAC;	98.2	7.8e-21
TRINITY_DN17602_c1_g1	A0A067ETM8_CITSI/541-790	A0A067ETM8.1 PF00060.24;Lig_chan;	65.1	1.9e-21
TRINITY_DN17602_c1_g3	A0A061DLQ8_THECC/596-840	A0A061DLQ8.1 PF00060.24;Lig_chan;	61	4.2e-22
TRINITY_DN17603_c1_g1	K4BJF2_SOLLC/125-467	K4BJF2.1 PF00069.23;Pkinase;	82.1	1e-89
TRINITY_DN17603_c2_g1	I1N1W0_SOYBN/55-155	I1N1W0.2 PF01205.17;UPF0029;	84.2	2.7e-42
TRINITY_DN17604_c2_g4	K4DI03_SOLLC/4-73	K4DI03.1 PF05486.10;SRP9-21;	90	1e-29
TRINITY_DN17604_c2_g7	K4DI03_SOLLC/4-73	K4DI03.1 PF05486.10;SRP9-21;	88.6	4.4e-29
TRINITY_DN17607_c0_g3	D7TX16_VITVI/122-310	D7TX16.1 PF16575.3;CLP1_P;	88.4	6.9e-92
TRINITY_DN17609_c0_g11	M1A3Z1_SOLTU/22-223	M1A3Z1.1 PF01680.15;SOR_SNZ;	78.3	2.7e-84
TRINITY_DN17609_c0_g5	K9VMW6_9CYAN/76-479	K9VMW6.1 PF02163.20;Peptidase_M50;	34	3.9e-34
TRINITY_DN17609_c0_g6	M1A3Z1_SOLTU/22-223	M1A3Z1.1 PF01680.15;SOR_SNZ;	79.2	8.6e-88
TRINITY_DN17609_c0_g9	E2LQV8_MONPE/1-181	E2LQV8.1 PF01680.15;SOR_SNZ;	77.8	6.8e-21
TRINITY_DN17611_c0_g2	B9SYK7_RICCO/4-283	B9SYK7.1 PF00069.23;Pkinase;	81.1	3.3e-134
TRINITY_DN17612_c0_g2	K4D586_SOLLC/157-382	K4D586.1 PF00112.21;Peptidase_C1;	84.3	1.8e-99
TRINITY_DN17613_c1_g4	A0A059CN61_EUCGR/151-275	A0A059CN61.1 PF00578.19;AhpC-TSA;	87.2	1.3e-59
TRINITY_DN17614_c0_g1	A0A0M3I1N4_ASCLU/8-57	A0A0M3I1N4.1 PF01484.15;Col_cuticle_N;	66	4.9e-11
TRINITY_DN17615_c0_g2	M5W2T1_PRUPE/93-265	M5W2T1.1 PF07855.10;ATG101;	82.8	1.6e-41
TRINITY_DN17615_c0_g8	A0A0D2U1C9_GOSRA/85-129	A0A0D2U1C9.1 PF13639.4;zf-RING_2;	86.4	1.7e-17
TRINITY_DN17615_c0_g9	M0ZKU5_SOLTU/20-87	M0ZKU5.1 PF00538.17;Linker_histone;	80.9	2.7e-22
TRINITY_DN17616_c0_g3	A0A0D9VXY0_9ORYZ/17-139	A0A0D9VXY0.1 PF03463.13;eRF1_1;	95.9	2.4e-61
TRINITY_DN17616_c0_g5	A0A067L0F2_JATCU/144-278	A0A067L0F2.1 PF03464.13;eRF1_2;	98.5	1.1e-68
TRINITY_DN17618_c0_g1	A0A067H856_CITSI/375-496	A0A067H856.1 PF04607.15;RelA_SpoT;	92.6	5.6e-59
TRINITY_DN17618_c0_g2	A0A067H851_CITSI/152-299	A0A067H851.1 PF13328.4;HD_4;	94.3	2.7e-39
TRINITY_DN17619_c0_g3	D7TRB4_VITVI/29-116	D7TRB4.1 PF01190.15;Pollen_Ole_e_I;	68.7	1.3e-19
TRINITY_DN17619_c0_g4	A0A0J8C7E9_BETVU/134-350	A0A0J8C7E9.1 PF07002.14;Copine;	92.7	1.3e-23
TRINITY_DN17620_c0_g2	A0A061EAT4_THECC/19-134	A0A061EAT4.1 PF00583.23;Acetyltransf_1;	71.9	3e-41
TRINITY_DN17624_c1_g2	M1CV07_SOLTU/4-287	M1CV07.1 PF00069.23;Pkinase;	90.5	4.1e-152
TRINITY_DN17624_c1_g4	M1CV07_SOLTU/4-287	M1CV07.1 PF00069.23;Pkinase;	87.3	3.4e-148
TRINITY_DN17627_c1_g1	W9QYQ9_9ROSA/7-47	W9QYQ9.1 PF12165.6;Alfin;	84.8	1.4e-09
TRINITY_DN17627_c1_g2	A0A0J8CJS9_BETVU/8-134	A0A0J8CJS9.1 PF12165.6;Alfin;	87.6	3.9e-48
TRINITY_DN17627_c1_g3	A0A0D2V881_GOSRA/11-139	A0A0D2V881.1 PF12165.6;Alfin;	79.8	1.6e-58
TRINITY_DN17627_c1_g6	K7UPQ6_MAIZE/29-76	K7UPQ6.1 PF12906.5;RINGv;	97.9	2.2e-23
TRINITY_DN17627_c1_g7	M5X0S3_PRUPE/8-134	M5X0S3.1 PF12165.6;Alfin;	87.3	5.8e-63
TRINITY_DN17628_c0_g3	A0A078HFE9_BRANA/32-160	A0A078HFE9.1 PF04852.10;DUF640;	85.2	4.8e-54
TRINITY_DN17630_c1_g4	A0A022QP13_ERYGU/67-93	A0A022QP13.1 PF13912.4;zf-C2H2_6;	96.3	3.8e-07
TRINITY_DN17630_c1_g5	A0A022QP13_ERYGU/67-93	A0A022QP13.1 PF13912.4;zf-C2H2_6;	92.6	4.3e-06
TRINITY_DN17632_c0_g1	A0A067ENP7_CITSI/120-267	A0A067ENP7.1 PF03981.10;Ubiq_cyt_C_chap;	69.6	8.2e-55
TRINITY_DN17632_c0_g2	V4UE32_9ROSI/12-106	V4UE32.1 PF07876.10;Dabb;	76.8	1.2e-36
TRINITY_DN17634_c0_g10	F6H934_VITVI/1-209	F6H934.1 PF00069.23;Pkinase;	63.3	4.2e-12
TRINITY_DN17634_c0_g2	V4SN73_9ROSI/312-561	V4SN73.1 PF07714.15;Pkinase_Tyr;	86.7	6.6e-38
TRINITY_DN17635_c0_g1	U3HZ62_ANAPL/49-100	U3HZ62.1 PF00097.23;zf-C3HC4;	94.2	7.5e-24
TRINITY_DN17641_c1_g1	A0A022Q8X5_ERYGU/4-177	A0A022Q8X5.1 PF00025.19;Arf;	94.3	8.4e-62
TRINITY_DN17641_c1_g3	A0A0J8BJ73_BETVU/4-177	A0A0J8BJ73.1 PF00025.19;Arf;	93.1	6.2e-58
TRINITY_DN17641_c2_g4	A0A061GIX0_THECC/166-452	A0A061GIX0.1 PF00931.20;NB-ARC;	56.2	1.8e-82
TRINITY_DN17644_c3_g2	M1C9M7_SOLTU/273-319	M1C9M7.1 PF14570.4;zf-RING_4;	95.7	7.9e-22
TRINITY_DN17644_c3_g6	Q6DI16_DANRE/1-385	Q6DI16.1 PF01216.15;Calsequestrin;	100	5.7e-46
TRINITY_DN17647_c0_g1	A0A022Q4N8_ERYGU/5-90	A0A022Q4N8.1 PF01221.16;Dynein_light;	88.4	9.4e-39
TRINITY_DN17647_c0_g3	A0A067DBN8_CITSI/19-258	A0A067DBN8.1 PF03283.11;PAE;	45.2	4e-14
TRINITY_DN17648_c0_g1	M5WZL4_PRUPE/73-423	M5WZL4.1 PF00443.27;UCH;	75.8	2e-143
TRINITY_DN17650_c1_g1	A0A067KAW1_JATCU/273-763	A0A067KAW1.1 PF01055.24;Glyco_hydro_31;	86	3.2e-269
TRINITY_DN17650_c1_g4	B9T066_RICCO/51-183	B9T066.1 PF16863.3;NtCtMGAM_N;	80	5.6e-56
TRINITY_DN17654_c0_g1	M1AIV3_SOLTU/39-147	M1AIV3.1 PF00011.19;HSP20;	73.4	2.6e-37
TRINITY_DN17660_c0_g2	A0A087GQF6_ARAAL/595-740	A0A087GQF6.1 PF07727.12;RVT_2;	78	2.6e-10
TRINITY_DN17663_c1_g10	V4VS87_9ROSI/7-170	V4VS87.1 PF00160.19;Pro_isomerase;	87.2	1.1e-79
TRINITY_DN17663_c1_g3	A0A067FML4_CITSI/10-174	A0A067FML4.1 PF00160.19;Pro_isomerase;	82.4	1e-76
TRINITY_DN17663_c1_g4	U1NAX4_ASCSU/35-198	U1NAX4.1 PF00160.19;Pro_isomerase;	91.7	6.5e-25
TRINITY_DN17665_c1_g1	W5NHJ2_LEPOC/22-154	W5NHJ2.1 PF00380.17;Ribosomal_S9;	97	4.5e-67
TRINITY_DN17668_c0_g2	A0A059CZ12_EUCGR/899-1079	A0A059CZ12.1 PF14309.4;DUF4378;	39.8	2e-21
TRINITY_DN17669_c0_g5	K4DCS5_SOLLC/33-116	K4DCS5.1 PF02298.15;Cu_bind_like;	66.7	1.9e-28
TRINITY_DN17671_c1_g1	W5KQE3_ASTMX/1201-1409	W5KQE3.1 PF12348.6;CLASP_N;	32.5	9.8e-32
TRINITY_DN17673_c0_g3	A0A022RGA1_ERYGU/27-327	A0A022RGA1.1 PF00389.28;2-Hacid_dh;	66.5	2.9e-105
TRINITY_DN17673_c0_g5	A0A059CHI8_EUCGR/42-128	A0A059CHI8.1 PF03330.16;DPBB_1;	93.3	8.6e-31
TRINITY_DN17675_c2_g1	K4C1X6_SOLLC/33-159	K4C1X6.1 PF00917.24;MATH;	90.6	8.2e-63
TRINITY_DN17675_c2_g4	M0TWM8_MUSAM/34-85	M0TWM8.1 PF00249.29;Myb_DNA-binding;	92.3	1.2e-20
TRINITY_DN17676_c1_g1	D7LCV9_ARALL/411-474	D7LCV9.1 PF08590.8;DUF1771;	85.1	1.3e-12
TRINITY_DN17677_c0_g1	Q93X45_SOLLC/342-581	Q93X45.1 PF00557.22;Peptidase_M24;	81.2	2.5e-113
TRINITY_DN17684_c0_g2	A0A022R827_ERYGU/3-68	A0A022R827.1 PF01246.18;Ribosomal_L24e;	87.9	8.1e-28
TRINITY_DN17685_c0_g1	V4T144_9ROSI/29-88	V4T144.1 PF02704.12;GASA;	91.7	1.5e-30
TRINITY_DN17685_c0_g2	D7T0R2_VITVI/50-142	D7T0R2.1 PF00504.19;Chloroa_b-bind;	74.2	7.7e-31
TRINITY_DN17685_c0_g7	A0A022PXL4_ERYGU/65-372	A0A022PXL4.1 PF07690.14;MFS_1;	92.9	4.8e-38
TRINITY_DN17688_c0_g1	F6GVW9_VITVI/77-217	F6GVW9.1 PF01565.21;FAD_binding_4;	62.5	3.2e-46
TRINITY_DN17688_c0_g2	V4VQ36_9ROSI/434-497	V4VQ36.1 PF08031.10;BBE;	60.9	1.2e-14
TRINITY_DN17692_c2_g1	A0A061FDP0_THECC/55-269	A0A061FDP0.1 PF12706.5;Lactamase_B_2;	79.5	4.5e-98
TRINITY_DN17693_c0_g1	A0A078FZT6_BRANA/94-270	A0A078FZT6.1 PF16166.3;TIC20;	81.5	5.4e-84
TRINITY_DN17694_c0_g1	DCAM_ORYSJ/14-343	Q0JC10.1 PF01536.14;SAM_decarbox;	99.7	1.7e-191
TRINITY_DN17694_c0_g2	C5YBI0_SORBI/14-343	C5YBI0.1 PF01536.14;SAM_decarbox;	94.3	4.6e-13
TRINITY_DN17695_c2_g5	V4TKK8_9ROSI/14-60	V4TKK8.1 PF07647.15;SAM_2;	95.7	8.8e-19
TRINITY_DN17697_c1_g1	A0A061FPW2_THECC/109-228	A0A061FPW2.1 PF09377.8;SBDS_C;	85	5.2e-53
TRINITY_DN17697_c1_g4	A0A0A0KIY6_CUCSA/16-103	A0A0A0KIY6.1 PF01172.16;SBDS;	88.6	9.5e-37
TRINITY_DN17699_c0_g2	M1BWJ4_SOLTU/12-147	M1BWJ4.1 PF02765.15;POT1;	59.7	2.5e-39
TRINITY_DN17700_c0_g1	Q46D33_METBF/56-483	Q46D33.1 PF00266.17;Aminotran_5;	30.9	1.4e-17
TRINITY_DN17701_c0_g1	M1CNK9_SOLTU/1-219	M1CNK9.1 PF06136.11;DUF966;	77.5	4.9e-10
TRINITY_DN17704_c1_g1	K7KGI6_SOYBN/84-507	K7KGI6.1 PF00026.21;Asp;	98.3	2.7e-240
TRINITY_DN17706_c0_g1	M0TYE6_MUSAM/126-394	M0TYE6.1 PF00069.23;Pkinase;	55.9	2.9e-85
TRINITY_DN17706_c0_g5	A0A0D2R0C8_GOSRA/396-512	A0A0D2R0C8.1 PF02373.20;JmjC;	93.2	7e-56
TRINITY_DN17707_c1_g4	A0A0D9ZUM6_9ORYZ/1781-2010	A0A0D9ZUM6.1 PF12134.6;PRP8_domainIV;	85.9	1.4e-36
TRINITY_DN17708_c0_g1	M1C1T4_SOLTU/111-389	M1C1T4.1 PF07466.9;DUF1517;	73.5	1.2e-102
TRINITY_DN17709_c0_g2	M1AVR6_SOLTU/129-248	M1AVR6.1 PF02537.13;CRCB;	81.7	1e-50
TRINITY_DN17710_c0_g1	A0A0J8D1N5_BETVU/217-475	A0A0J8D1N5.1 PF10477.7;EIF4E-T;	60.8	1.9e-60
TRINITY_DN17711_c0_g1	U5GFJ6_POPTR/90-289	U5GFJ6.1 PF07816.9;DUF1645;	37.5	1.4e-15
TRINITY_DN17712_c0_g2	A0A0A0KH75_CUCSA/17-70	A0A0A0KH75.1 PF15938.3;DUF4750;	80	2e-14
TRINITY_DN17712_c1_g2	K4AXD7_SOLLC/200-326	K4AXD7.1 PF15306.4;LIN37;	66.9	2.9e-36
TRINITY_DN17714_c0_g1	F6H2D6_VITVI/58-155	F6H2D6.1 PF03168.11;LEA_2;	55.1	4.8e-20
TRINITY_DN17716_c0_g1	A0A022QUS0_ERYGU/105-468	A0A022QUS0.1 PF00155.19;Aminotran_1_2;	75.9	2.8e-18
TRINITY_DN17717_c1_g1	A0A078JCQ3_BRANA/85-235	A0A078JCQ3.1 PF05201.13;GlutR_N;	92.7	1.2e-73
TRINITY_DN17717_c1_g4	A0A0A0LP19_CUCSA/428-532	A0A0A0LP19.1 PF00745.18;GlutR_dimer;	87.6	7.6e-46
TRINITY_DN17718_c1_g1	U5GRG7_POPTR/220-400	U5GRG7.1 PF01077.20;NIR_SIR;	90.1	1e-91
TRINITY_DN17718_c1_g2	A0A078C5F1_BRANA/227-407	A0A078C5F1.1 PF01077.20;NIR_SIR;	88.3	1.5e-91
TRINITY_DN17722_c1_g1	M0YCC4_HORVD/72-129	M0YCC4.1 PF03106.13;WRKY;	97.8	5.1e-19
TRINITY_DN17722_c2_g1	G7IAE4_MEDTR/265-448	G7IAE4.1 PF01590.24;GAF;	83.6	2.6e-85
TRINITY_DN17722_c2_g3	A0A067EYQ3_CITSI/1003-1115	A0A067EYQ3.1 PF02518.24;HATPase_c;	75.2	1.6e-40
TRINITY_DN17724_c0_g1	A0A061GFC2_THECC/4-142	A0A061GFC2.1 PF04520.11;Senescence_reg;	85.4	8.7e-16
TRINITY_DN17724_c1_g2	A0A015JY85_9GLOM/57-108	A0A015JY85.1 PF00010.24;HLH;	100	6.1e-20
TRINITY_DN17725_c0_g1	M1CB59_SOLTU/10-134	M1CB59.1 PF01429.17;MBD;	37.5	7.2e-19
TRINITY_DN17727_c0_g2	A0A059D4S1_EUCGR/136-350	A0A059D4S1.1 PF02096.18;60KD_IMP;	92.1	8.9e-110
TRINITY_DN17729_c1_g2	V4RZC4_9ROSI/76-140	V4RZC4.1 PF00462.22;Glutaredoxin;	83.8	3.8e-11
TRINITY_DN17729_c1_g3	D7U0W3_VITVI/57-285	D7U0W3.1 PF02230.14;Abhydrolase_2;	75.6	1e-10
TRINITY_DN17730_c0_g1	K4C981_SOLLC/64-175	K4C981.1 PF02391.15;MoaE;	83.5	1.4e-45
TRINITY_DN17731_c0_g2	A0A059DGI5_EUCGR/194-350	A0A059DGI5.1 PF02453.15;Reticulon;	67.6	5.3e-19
TRINITY_DN17731_c0_g3	A0A022QPH2_ERYGU/177-333	A0A022QPH2.1 PF02453.15;Reticulon;	70	2.2e-29
TRINITY_DN17732_c0_g2	A0A0E0PR53_ORYRU/4-142	A0A0E0PR53.1 PF03244.12;PSI_PsaH;	100	6.9e-27
TRINITY_DN17732_c1_g1	F6HHR9_VITVI/33-189	F6HHR9.1 PF04043.13;PMEI;	68.2	1.1e-52
TRINITY_DN17732_c1_g3	A0A0D2NZM1_GOSRA/176-408	A0A0D2NZM1.1 PF00208.19;ELFV_dehydrog;	85.8	4e-117
TRINITY_DN17733_c0_g1	M4DND9_BRARP/82-228	M4DND9.1 PF02383.16;Syja_N;	88.9	1.1e-39
TRINITY_DN17737_c0_g1	D7SKU5_VITVI/27-132	D7SKU5.1 PF00085.18;Thioredoxin;	80.8	1.8e-30
TRINITY_DN17739_c0_g3	A0A022QS03_ERYGU/32-70	A0A022QS03.1 PF08263.10;LRRNT_2;	68.4	8.5e-07
TRINITY_DN17739_c0_g4	D7TZI8_VITVI/402-674	D7TZI8.1 PF07714.15;Pkinase_Tyr;	87	1.2e-75
TRINITY_DN17740_c1_g1	W1PLX2_AMBTC/406-601	W1PLX2.1 PF14075.4;UBN_AB;	50.5	1.5e-47
TRINITY_DN17741_c0_g1	SUMO1_ARATH/18-91	P55852.2 PF00240.21;ubiquitin;	91.9	8.2e-32
TRINITY_DN17741_c0_g4	SUMO1_ARATH/18-91	P55852.2 PF00240.21;ubiquitin;	94.6	1.6e-32
TRINITY_DN17742_c0_g6	AHL23_ARATH/110-223	O23620.1 PF03479.13;DUF296;	91.2	2.7e-51
TRINITY_DN17743_c0_g1	R0HUD5_9BRAS/1-125	R0HUD5.1 PF00705.16;PCNA_N;	89.6	1.1e-58
TRINITY_DN17744_c1_g3	A0A087G9R0_ARAAL/821-941	A0A087G9R0.1 PF13456.4;RVT_3;	50	2.1e-12
TRINITY_DN17747_c1_g1	A0A0E0LCQ0_ORYPU/799-847	A0A0E0LCQ0.1 PF00400.30;WD40;	89.1	1e-15
TRINITY_DN17747_c1_g2	T1EEI3_HELRO/318-370	T1EEI3.1 PF00400.30;WD40;	68.6	4.1e-13
TRINITY_DN17747_c1_g6	A0A0E0LCQ0_ORYPU/799-847	A0A0E0LCQ0.1 PF00400.30;WD40;	91.7	1e-17
TRINITY_DN17747_c1_g7	T1EEI3_HELRO/318-370	T1EEI3.1 PF00400.30;WD40;	65.1	9e-09
TRINITY_DN17748_c0_g1	W9S3G2_9ROSA/66-210	W9S3G2.1 PF03018.12;Dirigent;	73.1	1.9e-57
TRINITY_DN17748_c0_g2	W9S3G2_9ROSA/66-210	W9S3G2.1 PF03018.12;Dirigent;	79.2	3.1e-62
TRINITY_DN17750_c1_g1	B9H2Y5_POPTR/222-444	B9H2Y5.2 PF00667.18;FAD_binding_1;	72.6	1.3e-41
TRINITY_DN17751_c1_g5	W1PYL1_AMBTC/15-81	W1PYL1.1 PF00076.20;RRM_1;	65.7	7.8e-19
TRINITY_DN17752_c0_g3	G3PQB3_GASAC/187-213	G3PQB3.1 PF00642.22;zf-CCCH;	96.3	1.9e-08
TRINITY_DN17753_c1_g2	D7SR28_VITVI/636-742	D7SR28.1 PF13646.4;HEAT_2;	65.2	2.4e-23
TRINITY_DN17755_c0_g1	F6GT30_VITVI/24-341	F6GT30.1 PF03662.12;Glyco_hydro_79n;	75.5	1.6e-71
TRINITY_DN17756_c0_g2	D2W1S7_NAEGR/3-72	D2W1S7.1 PF00240.21;ubiquitin;	94.2	5.4e-28
TRINITY_DN17759_c0_g2	A0A067EVC3_CITSI/229-272	A0A067EVC3.1 PF13639.4;zf-RING_2;	70.5	1.4e-13
TRINITY_DN17763_c1_g1	Q8JIN1_ORYLA/8-112	Q8JIN1.1 PF00042.20;Globin;	82.9	5.1e-45
TRINITY_DN17763_c2_g3	D7SUV0_VITVI/92-327	D7SUV0.1 PF02485.19;Branch;	75.6	3.2e-48
TRINITY_DN17763_c2_g5	A0A0D2U4W3_GOSRA/88-323	A0A0D2U4W3.1 PF02485.19;Branch;	76.2	2.7e-12
TRINITY_DN17764_c1_g1	A0A022QVE9_ERYGU/91-155	A0A022QVE9.1 PF00462.22;Glutaredoxin;	92.3	1.7e-28
TRINITY_DN17765_c0_g1	A0A0B0MY34_GOSAR/21-353	A0A0B0MY34.1 PF04997.10;RNA_pol_Rpb1_1;	63.9	8.2e-72
TRINITY_DN17766_c1_g2	A0A0D9WEX4_9ORYZ/1-425	A0A0D9WEX4.1 PF00996.16;GDI;	97.4	3.3e-59
TRINITY_DN17767_c1_g1	A0A022QGL5_ERYGU/30-485	A0A022QGL5.1 PF00067.20;p450;	56.5	4.2e-149
TRINITY_DN17769_c0_g2	Q6V7U8_SOLLC/270-433	Q6V7U8.1 PF01554.16;MatE;	80.5	2.5e-67
TRINITY_DN17771_c0_g2	R0GL75_9BRAS/17-342	R0GL75.1 PF00009.25;GTP_EFTU;	92.9	4.6e-110
TRINITY_DN17772_c0_g3	A0A022S0Q5_ERYGU/222-355	A0A022S0Q5.1 PF00004.27;AAA;	96.3	1.7e-65
TRINITY_DN17772_c0_g8	A0A0B2W750_TOXCA/418-481	A0A0B2W750.1 PF00004.27;AAA;	80.6	8.1e-08
TRINITY_DN17775_c0_g1	D7U2Q7_VITVI/7-297	D7U2Q7.1 PF03151.14;TPT;	91.4	5.3e-140
TRINITY_DN17777_c0_g1	F1QC76_DANRE/116-444	F1QC76.1 PF00413.22;Peptidase_M10;	86.5	2.9e-139
TRINITY_DN17777_c0_g2	I3K177_ORENI/586-632	I3K177.1 PF00045.17;Hemopexin;	77.3	3.5e-13
TRINITY_DN17779_c1_g2	A0A0B0MYY3_GOSAR/1-191	A0A0B0MYY3.1 PF00006.23;ATP-synt_ab;	98.3	9.6e-95
TRINITY_DN17781_c1_g1	W5K2M0_ASTMX/23-106	W5K2M0.1 PF04749.15;PLAC8;	92.9	7.6e-43
TRINITY_DN17782_c0_g2	B9RTP0_RICCO/244-402	B9RTP0.1 PF05179.12;CDC73_C;	93.1	1.3e-79
TRINITY_DN17784_c1_g2	B9IHZ4_POPTR/83-350	B9IHZ4.1 PF00487.22;FA_desaturase;	56	4.2e-47
TRINITY_DN17786_c0_g2	A0A059D710_EUCGR/20-91	A0A059D710.1 PF07983.11;X8;	77.5	1.3e-27
TRINITY_DN17788_c0_g1	V7CN41_PHAVU/119-237	V7CN41.1 PF12428.6;DUF3675;	74.1	3.8e-14
TRINITY_DN17789_c0_g1	M0U3J3_MUSAM/47-218	M0U3J3.1 PF00933.19;Glyco_hydro_3;	63.4	1.9e-18
TRINITY_DN17791_c0_g5	W9SM98_9ROSA/7-188	W9SM98.1 PF01251.16;Ribosomal_S7e;	86.3	4.1e-84
TRINITY_DN17792_c0_g1	V7BA93_PHAVU/22-294	V7BA93.1 PF00248.19;Aldo_ket_red;	88.3	9.2e-140
TRINITY_DN17793_c3_g6	S8CXE5_9LAMI/439-577	S8CXE5.1 PF04146.13;YTH;	82.6	8.1e-57
TRINITY_DN17795_c1_g1	M5W5W0_PRUPE/12-199	M5W5W0.1 PF00071.20;Ras;	80.7	8.5e-64
TRINITY_DN17795_c1_g6	W9S310_9ROSA/9-410	W9S310.1 PF01676.16;Metalloenzyme;	89.8	8.4e-216
TRINITY_DN17795_c1_g9	A0A0D2Q4S0_GOSRA/8-169	A0A0D2Q4S0.1 PF00071.20;Ras;	97.1	3.6e-54
TRINITY_DN17796_c0_g1	K4BN28_SOLLC/16-105	K4BN28.1 PF07911.11;DUF1677;	72.7	3.3e-15
TRINITY_DN17796_c0_g2	I1MCU1_SOYBN/59-145	I1MCU1.1 PF07911.11;DUF1677;	80.5	2.6e-36
TRINITY_DN17798_c0_g1	A0A022RG09_ERYGU/17-111	A0A022RG09.1 PF00011.19;HSP20;	57.8	3.4e-20
TRINITY_DN17801_c0_g2	E0CQ41_VITVI/1-242	E0CQ41.1 PF00590.18;TP_methylase;	88.4	1.2e-121
TRINITY_DN17802_c0_g1	A0A0E0LS25_ORYPU/286-350	A0A0E0LS25.1 PF00076.20;RRM_1;	98.5	7.9e-30
TRINITY_DN17802_c1_g1	J3MR04_ORYBR/123-194	J3MR04.1 PF00076.20;RRM_1;	96.5	6.9e-25
TRINITY_DN17802_c1_g3	A0A0D9W9T5_9ORYZ/103-173	A0A0D9W9T5.1 PF00076.20;RRM_1;	93.9	3.8e-10
TRINITY_DN17802_c2_g2	K4AYJ2_SOLLC/981-1124	K4AYJ2.1 PF07304.9;SRA1;	87.6	1.6e-48
TRINITY_DN17804_c0_g1	RS8_DANRE/1-190	P62247.2 PF01201.20;Ribosomal_S8e;	85.3	1.5e-89
TRINITY_DN17805_c0_g2	E7FAR9_DANRE/45-82	E7FAR9.1 PF05184.13;SapB_1;	65.8	3.4e-08
TRINITY_DN17805_c1_g1	Q1AL73_CHLSB/14-460	Q1AL73.1 PF00115.18;COX1;	85.5	7.1e-215
TRINITY_DN17805_c1_g2	COX1_TETNG/14-460	Q4JQI5.1 PF00115.18;COX1;	90.4	2.5e-223
TRINITY_DN17805_c1_g3	W1P4G4_AMBTC/597-762	W1P4G4.1 PF07724.12;AAA_2;	89.8	5.1e-79
TRINITY_DN17805_c1_g4	COX1_TETNG/14-460	Q4JQI5.1 PF00115.18;COX1;	90.2	7.4e-223
TRINITY_DN17806_c0_g2	A0A067KG35_JATCU/5-222	A0A067KG35.1 PF07808.11;RED_N;	80.7	5.9e-91
TRINITY_DN17806_c0_g3	W9QEG3_9ROSA/63-317	W9QEG3.1 PF02854.17;MIF4G;	80.8	3.2e-111
TRINITY_DN17806_c0_g7	M5W986_PRUPE/119-205	M5W986.1 PF14159.4;CAAD;	64.4	1.2e-26
TRINITY_DN17807_c1_g1	F6HMF0_VITVI/62-219	F6HMF0.1 PF01652.16;IF4E;	80.4	9.4e-79
TRINITY_DN17808_c0_g3	V4RRY1_9ROSI/120-342	V4RRY1.1 PF01556.16;DnaJ_C;	88.2	3.8e-38
TRINITY_DN17810_c0_g1	A0A022QGU4_ERYGU/54-249	A0A022QGU4.1 PF00149.26;Metallophos;	97.7	2.1e-98
TRINITY_DN17812_c1_g2	M1AAK6_SOLTU/11-63	M1AAK6.1 PF02238.13;COX7a;	81.1	3.8e-17
TRINITY_DN17812_c1_g4	M1AAK6_SOLTU/11-63	M1AAK6.1 PF02238.13;COX7a;	81.1	3.1e-17
TRINITY_DN17813_c0_g2	A0A022PVJ5_ERYGU/106-619	A0A022PVJ5.1 PF03141.14;Methyltransf_29;	84.4	2.1e-274
TRINITY_DN17813_c0_g6	A9PF21_POPTR/76-512	A9PF21.1 PF01474.14;DAHP_synth_2;	95.7	3.9e-32
TRINITY_DN17813_c0_g9	F6HTC6_VITVI/92-597	F6HTC6.1 PF03141.14;Methyltransf_29;	81.2	1.3e-259
TRINITY_DN17814_c0_g1	D7SKW7_VITVI/291-328	D7SKW7.1 PF00400.30;WD40;	78.9	2.2e-10
TRINITY_DN17817_c0_g1	A0A061FRD9_THECC/82-342	A0A061FRD9.1 PF00685.25;Sulfotransfer_1;	69.3	6.9e-110
TRINITY_DN17818_c2_g1	M5WT63_PRUPE/144-261	M5WT63.1 PF13640.4;2OG-FeII_Oxy_3;	89	9.3e-57
TRINITY_DN17818_c2_g2	I1K337_SOYBN/78-160	I1K337.1 PF00575.21;S1;	95.1	7.6e-37
TRINITY_DN17818_c2_g3	K7KY92_SOYBN/42-398	K7KY92.1 PF07223.9;DUF1421;	68	4.1e-31
TRINITY_DN17822_c0_g1	K4CAQ5_SOLLC/117-181	K4CAQ5.1 PF00013.27;KH_1;	86.2	2.4e-22
TRINITY_DN17822_c0_g5	A0A059BGY3_EUCGR/50-378	A0A059BGY3.1 PF00933.19;Glyco_hydro_3;	79.6	5.4e-158
TRINITY_DN17824_c1_g1	U5GC64_POPTR/225-289	U5GC64.1 PF00035.24;dsrm;	64.6	1.9e-16
TRINITY_DN17828_c2_g3	A5BM29_VITVI/6-120	A5BM29.1 PF02136.18;NTF2;	85.2	2.9e-50
TRINITY_DN17829_c1_g2	A2XZ50_ORYSI/18-144	A2XZ50.1 PF00179.24;UQ_con;	100	2e-16
TRINITY_DN17830_c2_g1	A0A0A0KJS4_CUCSA/64-121	A0A0A0KJS4.1 PF00403.24;HMA;	87.9	2.2e-21
TRINITY_DN17830_c2_g2	D7KAT8_ARALL/5-260	D7KAT8.1 PF14290.4;DUF4370;	45.2	1.1e-11
TRINITY_DN17832_c0_g4	F4JP79_ARATH/7-42	F4JP79.1 PF00320.25;GATA;	91.7	1.9e-13
TRINITY_DN17832_c0_g8	I1J090_BRADI/7-42	I1J090.1 PF00320.25;GATA;	97.2	1.3e-14
TRINITY_DN17833_c0_g1	A0A0B0M9H0_GOSAR/48-510	A0A0B0M9H0.1 PF00067.20;p450;	65.9	8.5e-28
TRINITY_DN17833_c0_g2	A0A061G1T2_THECC/2-278	A0A061G1T2.1 PF00067.20;p450;	63	1.8e-35
TRINITY_DN17834_c0_g5	NU1M_DANRE/10-311	Q9MIZ0.1 PF00146.19;NADHdh;	90	1.1e-133
TRINITY_DN17834_c0_g7	A0A096N1N2_PAPAN/98-197	A0A096N1N2.1 PF14497.4;GST_C_3;	97	1.6e-49
TRINITY_DN17836_c0_g4	A0A0D2W3Z0_GOSRA/97-534	A0A0D2W3Z0.1 PF00854.19;PTR2;	74.9	7.6e-181
TRINITY_DN17836_c0_g5	M4A318_XIPMA/5-181	M4A318.1 PF00071.20;Ras;	100	1.2e-19
TRINITY_DN17838_c1_g4	U5GLM4_POPTR/87-274	U5GLM4.1 PF02492.17;cobW;	90.4	1.1e-92
TRINITY_DN17838_c2_g1	A0A067DU28_CITSI/183-390	A0A067DU28.1 PF00856.26;SET;	75	4.4e-89
TRINITY_DN17839_c4_g1	A0A078EBI9_BRANA/129-933	A0A078EBI9.1 PF00311.15;PEPcase;	90.5	8.8e-160
TRINITY_DN17839_c4_g2	A0A022S1C1_ERYGU/162-963	A0A022S1C1.1 PF00311.15;PEPcase;	87.2	1.3e-118
TRINITY_DN17839_c4_g3	A0A072TPW7_MEDTR/162-967	A0A072TPW7.1 PF00311.15;PEPcase;	95.6	9.3e-30
TRINITY_DN17840_c0_g1	F6H390_VITVI/41-318	F6H390.1 PF00481.19;PP2C;	72.7	3.5e-74
TRINITY_DN17841_c1_g1	B9RI93_RICCO/9-108	B9RI93.1 PF12796.5;Ank_2;	41.2	6.2e-11
TRINITY_DN17845_c1_g1	A0A0R4IHB1_DANRE/1-294	A0A0R4IHB1.1 PF00069.23;Pkinase;	95	7.3e-124
TRINITY_DN17845_c1_g2	W5MV74_LEPOC/159-475	W5MV74.1 PF00069.23;Pkinase;	100	5.2e-08
TRINITY_DN17845_c2_g3	V7CSG2_PHAVU/40-102	V7CSG2.1 PF13855.4;LRR_8;	69.8	1.4e-16
TRINITY_DN17847_c0_g1	A0A059BUW0_EUCGR/83-186	A0A059BUW0.1 PF00085.18;Thioredoxin;	85.3	1.5e-46
TRINITY_DN17848_c0_g1	A0A067JN43_JATCU/175-218	A0A067JN43.1 PF13639.4;zf-RING_2;	84.1	7.9e-18
TRINITY_DN17849_c0_g2	A0A022Q416_ERYGU/52-155	A0A022Q416.1 PF01386.17;Ribosomal_L25p;	89.4	3.4e-46
TRINITY_DN17850_c0_g1	D7U005_VITVI/430-578	D7U005.1 PF05199.11;GMC_oxred_C;	60.4	4.7e-48
TRINITY_DN17850_c0_g3	D7U005_VITVI/430-578	D7U005.1 PF05199.11;GMC_oxred_C;	60.4	2.7e-44
TRINITY_DN17852_c1_g1	T1L438_TETUR/29-123	T1L438.1 PF00338.20;Ribosomal_S10;	34	1.4e-06
TRINITY_DN17853_c0_g1	V4SHB9_9ROSI/35-216	V4SHB9.1 PF08547.10;CIA30;	89.1	1.4e-94
TRINITY_DN17854_c0_g1	K4BH79_SOLLC/108-306	K4BH79.1 PF01545.19;Cation_efflux;	61.1	1.4e-19
TRINITY_DN17855_c1_g1	C1N7W1_MICPC/7-224	C1N7W1.1 PF02517.14;Abi;	43.5	9.4e-46
TRINITY_DN17856_c1_g1	A0A059CJ15_EUCGR/2-111	A0A059CJ15.1 PF01486.15;K-box;	70.4	2.6e-31
TRINITY_DN17857_c1_g2	A0A087GCA0_ARAAL/335-511	A0A087GCA0.1 PF07727.12;RVT_2;	58.3	1e-34
TRINITY_DN17857_c1_g3	A0A067FZB3_CITSI/38-211	A0A067FZB3.1 PF01595.18;DUF21;	90.9	1.3e-26
TRINITY_DN17859_c0_g1	A0A061DP78_THECC/455-783	A0A061DP78.1 PF00702.24;Hydrolase;	73.2	7.1e-126
TRINITY_DN17859_c0_g2	A0A0D2MU87_GOSRA/193-442	A0A0D2MU87.1 PF00122.18;E1-E2_ATPase;	76.8	1e-99
TRINITY_DN17860_c0_g3	A0A022R6H2_ERYGU/8-273	A0A022R6H2.1 PF00795.20;CN_hydrolase;	89.8	2.9e-71
TRINITY_DN17861_c0_g1	E0CQ11_VITVI/41-178	E0CQ11.1 PF05903.12;Peptidase_C97;	88.4	1.2e-71
TRINITY_DN17863_c0_g1	B9SN10_RICCO/54-450	B9SN10.1 PF07690.14;MFS_1;	67.2	1.7e-105
TRINITY_DN17863_c0_g2	B9SN10_RICCO/54-450	B9SN10.1 PF07690.14;MFS_1;	68	1.4e-29
TRINITY_DN17864_c0_g1	K4BCT2_SOLLC/89-276	K4BCT2.1 PF08543.10;Phos_pyr_kin;	85.1	9.1e-88
TRINITY_DN17865_c0_g1	GATC_VITVI/59-130	D7STK2.1 PF02686.13;Glu-tRNAGln;	68.1	9.4e-23
TRINITY_DN17866_c0_g1	M5WSM1_PRUPE/29-509	M5WSM1.1 PF00232.16;Glyco_hydro_1;	54.4	1.5e-27
TRINITY_DN17867_c0_g1	M5W2N6_PRUPE/92-457	M5W2N6.1 PF00155.19;Aminotran_1_2;	92.1	5.3e-200
TRINITY_DN17868_c0_g3	E7F0A1_DANRE/1-141	E7F0A1.1 PF00235.17;Profilin;	80.1	3.9e-61
TRINITY_DN17870_c0_g1	A0A067JHC4_JATCU/62-184	A0A067JHC4.1 PF09335.9;SNARE_assoc;	81.3	3.1e-52
TRINITY_DN17871_c0_g2	A5AFH3_VITVI/25-145	A5AFH3.1 PF02221.13;E1_DerP2_DerF2;	56.8	3.1e-36
TRINITY_DN17872_c0_g1	F6I1N3_VITVI/65-429	F6I1N3.1 PF01979.18;Amidohydro_1;	46.6	5.2e-109
TRINITY_DN17873_c2_g3	V4T7J1_9ROSI/52-291	V4T7J1.1 PF09346.8;SMI1_KNR4;	50	9.7e-67
TRINITY_DN17874_c0_g1	M5X1S5_PRUPE/5-319	M5X1S5.1 PF04321.15;RmlD_sub_bind;	69.9	4.2e-25
TRINITY_DN17876_c0_g1	A0A0D2V906_GOSRA/58-154	A0A0D2V906.1 PF02298.15;Cu_bind_like;	76.3	2.5e-41
TRINITY_DN17877_c0_g1	E1Z8J8_CHLVA/10-51	E1Z8J8.1 PF00832.18;Ribosomal_L39;	88.1	4.2e-13
TRINITY_DN17877_c0_g4	K4CF01_SOLLC/152-254	K4CF01.1 PF12894.5;ANAPC4_WD40;	66.3	8.7e-34
TRINITY_DN17879_c0_g1	A0A022PWI2_ERYGU/502-774	A0A022PWI2.1 PF07714.15;Pkinase_Tyr;	75.9	7.2e-67
TRINITY_DN17879_c0_g2	U5GE18_POPTR/86-399	U5GE18.1 PF14476.4;Chloroplast_duf;	67.8	4.4e-109
TRINITY_DN17879_c0_g4	M5X106_PRUPE/101-207	M5X106.1 PF03763.11;Remorin_C;	88.8	2.8e-26
TRINITY_DN17879_c0_g7	A0A0K9NLX9_ZOSMR/58-169	A0A0K9NLX9.1 PF01453.22;B_lectin;	54.1	8.2e-17
TRINITY_DN17880_c0_g1	V4MXN3_EUTSA/6-410	V4MXN3.1 PF01494.17;FAD_binding_3;	74.2	1e-88
TRINITY_DN17882_c0_g4	A0A067ER38_CITSI/366-702	A0A067ER38.1 PF03124.12;EXS;	67.4	7.8e-09
TRINITY_DN17882_c0_g6	A0A061FAS1_THECC/400-735	A0A061FAS1.1 PF03124.12;EXS;	80.6	3.5e-27
TRINITY_DN17882_c0_g7	A0A067F2B8_CITSI/63-321	A0A067F2B8.1 PF00171.20;Aldedh;	81.6	2.4e-94
TRINITY_DN17883_c0_g1	A0A022RAE5_ERYGU/59-166	A0A022RAE5.1 PF00101.18;RuBisCO_small;	87	5.3e-55
TRINITY_DN17886_c0_g1	W9RFV7_9ROSA/158-311	W9RFV7.1 PF02535.20;Zip;	92.6	8e-65
TRINITY_DN17887_c0_g1	W5FIR7_WHEAT/99-236	W5FIR7.1 PF00179.24;UQ_con;	100	3.3e-35
TRINITY_DN17887_c2_g3	A0A072URE9_MEDTR/26-145	A0A072URE9.1 PF00179.24;UQ_con;	81.2	8.4e-12
TRINITY_DN17892_c0_g1	A0A022R427_ERYGU/8-104	A0A022R427.1 PF02214.20;BTB_2;	80.4	2.2e-36
TRINITY_DN17893_c1_g1	V7BM68_PHAVU/39-144	V7BM68.1 PF00168.28;C2;	88.5	2.4e-34
TRINITY_DN17893_c1_g2	V4UJV1_9ROSI/100-380	V4UJV1.1 PF00481.19;PP2C;	81.8	4.2e-32
TRINITY_DN17893_c1_g3	B6JVG1_SCHJY/7-55	B6JVG1.1 PF01679.15;Pmp3;	89.1	4e-15
TRINITY_DN17893_c1_g4	M5W7R3_PRUPE/395-452	M5W7R3.1 PF03106.13;WRKY;	82.8	2.8e-22
TRINITY_DN17894_c0_g1	M1C263_SOLTU/12-208	M1C263.1 PF00227.24;Proteasome;	92.9	3.3e-100
TRINITY_DN17896_c0_g1	A0A061FCW9_THECC/78-169	A0A061FCW9.1 PF01486.15;K-box;	58.7	4.5e-21
TRINITY_DN17897_c0_g1	F6GYL8_VITVI/35-177	F6GYL8.1 PF02453.15;Reticulon;	82	4.3e-55
TRINITY_DN17898_c1_g1	R0GYR9_9BRAS/13-174	R0GYR9.1 PF00071.20;Ras;	92.9	1.1e-75
TRINITY_DN17900_c0_g3	M1CFF0_SOLTU/257-331	M1CFF0.1 PF02201.16;SWIB;	74.3	1.4e-25
TRINITY_DN17900_c0_g4	M5W8I7_PRUPE/29-345	M5W8I7.1 PF16363.3;GDP_Man_Dehyd;	91.2	1.4e-170
TRINITY_DN17900_c0_g5	M5W8I7_PRUPE/29-345	M5W8I7.1 PF16363.3;GDP_Man_Dehyd;	89.5	8.3e-48
TRINITY_DN17901_c0_g1	R0IJB3_9BRAS/46-231	R0IJB3.1 PF00227.24;Proteasome;	91.9	1.6e-97
TRINITY_DN17903_c0_g1	A0A061FZ04_THECC/43-285	A0A061FZ04.1 PF00141.21;peroxidase;	77.1	1.5e-96
TRINITY_DN17904_c0_g4	J3MQ70_ORYBR/4-443	J3MQ70.1 PF00022.17;Actin;	98.9	2.5e-46
TRINITY_DN17906_c0_g2	A0A0J8BZ53_BETVU/507-629	A0A0J8BZ53.1 PF10539.7;Dev_Cell_Death;	79.5	8e-55
TRINITY_DN17907_c0_g9	A0A059ANJ9_EUCGR/11-224	A0A059ANJ9.1 PF03114.16;BAR;	85.3	3e-25
TRINITY_DN17908_c0_g1	A0A061FKE7_THECC/27-103	A0A061FKE7.1 PF02597.18;ThiS;	79.2	1.9e-28
TRINITY_DN17909_c1_g6	A0A0B0MT33_GOSAR/27-201	A0A0B0MT33.1 PF02776.16;TPP_enzyme_N;	93.1	2.6e-91
TRINITY_DN17912_c0_g2	A0A022PP77_ERYGU/364-1086	A0A022PP77.1 PF03552.12;Cellulose_synt;	89.9	6.3e-155
TRINITY_DN17912_c0_g3	A0A067KY23_JATCU/359-1083	A0A067KY23.1 PF03552.12;Cellulose_synt;	93.4	2.5e-36
TRINITY_DN17912_c0_g6	F6H4C8_VITVI/370-1076	F6H4C8.1 PF03552.12;Cellulose_synt;	93.2	1.5e-48
TRINITY_DN17912_c0_g7	A0A0D2MLG8_GOSRA/342-1065	A0A0D2MLG8.1 PF03552.12;Cellulose_synt;	93.1	2.5e-127
TRINITY_DN17912_c0_g8	F6GY47_VITVI/368-1091	F6GY47.1 PF03552.12;Cellulose_synt;	86	2e-72
TRINITY_DN17913_c0_g2	A0A072V4I3_MEDTR/276-383	A0A072V4I3.1 PF01399.25;PCI;	91.7	1.1e-47
TRINITY_DN17914_c0_g1	K4CN45_SOLLC/4-251	K4CN45.1 PF00335.18;Tetraspannin;	85	1.4e-109
TRINITY_DN17917_c0_g1	A0A022R6J7_ERYGU/150-591	A0A022R6J7.1 PF12899.5;Glyco_hydro_100;	90.4	1.5e-83
TRINITY_DN17919_c2_g3	V4T3L1_9ROSI/373-411	V4T3L1.1 PF00400.30;WD40;	97.4	2e-15
TRINITY_DN17919_c2_g4	C1MIB8_MICPC/484-589	C1MIB8.1 PF12894.5;ANAPC4_WD40;	73.6	6.9e-46
TRINITY_DN17920_c0_g3	I1K4U7_SOYBN/367-1089	I1K4U7.1 PF03552.12;Cellulose_synt;	100	2.3e-116
TRINITY_DN17921_c0_g1	F1R7X7_DANRE/94-176	F1R7X7.1 PF00017.22;SH2;	85.5	6.8e-36
TRINITY_DN17922_c1_g4	A0A022R4R3_ERYGU/182-391	A0A022R4R3.1 PF02786.15;CPSase_L_D2;	94.7	7.7e-106
TRINITY_DN17924_c0_g1	F6HZI8_VITVI/17-69	F6HZI8.1 PF00847.18;AP2;	82.7	1.7e-17
TRINITY_DN17924_c1_g1	S8DQ13_9LAMI/56-117	S8DQ13.1 PF12352.6;V-SNARE_C;	82.8	7.5e-18
TRINITY_DN17924_c1_g2	A0A0E0RG67_ORYRU/59-166	A0A0E0RG67.1 PF00101.18;RuBisCO_small;	100	3.7e-59
TRINITY_DN17925_c1_g1	M0SNZ5_MUSAM/27-152	M0SNZ5.1 PF00917.24;MATH;	88.1	1.3e-61
TRINITY_DN17925_c1_g2	U5GJL8_POPTR/32-157	U5GJL8.1 PF00917.24;MATH;	93.7	1.1e-64
TRINITY_DN17928_c0_g1	K4C8I7_SOLLC/7-84	K4C8I7.1 PF09429.8;Wbp11;	81.6	3.1e-07
TRINITY_DN17928_c1_g3	A0A059BRL1_EUCGR/16-118	A0A059BRL1.1 PF02036.15;SCP2;	82.7	4.9e-19
TRINITY_DN17930_c0_g1	A0A0E0P897_ORYRU/25-273	A0A0E0P897.1 PF13714.4;PEP_mutase;	100	9.1e-07
TRINITY_DN17930_c1_g1	A0A061ERJ7_THECC/78-326	A0A061ERJ7.1 PF13714.4;PEP_mutase;	88.4	1.4e-123
TRINITY_DN17932_c0_g1	A0A061GJC7_THECC/35-120	A0A061GJC7.1 PF02298.15;Cu_bind_like;	61.7	2.6e-15
TRINITY_DN17934_c0_g1	H0XHY4_OTOGA/3-99	H0XHY4.1 PF01157.16;Ribosomal_L21e;	93.8	5.8e-47
TRINITY_DN17934_c0_g10	COX1_DROSE/12-458	Q34391.2 PF00115.18;COX1;	70.3	8.5e-68
TRINITY_DN17934_c0_g2	Q1AL73_CHLSB/14-460	Q1AL73.1 PF00115.18;COX1;	87	6.3e-219
TRINITY_DN17934_c0_g6	COX1_TETNG/14-460	Q4JQI5.1 PF00115.18;COX1;	69.1	1e-25
TRINITY_DN17934_c0_g7	H0Z1N0_TAEGU/1-124	H0Z1N0.1 PF01092.17;Ribosomal_S6e;	98.4	1.1e-64
TRINITY_DN17934_c0_g8	H0Z1N0_TAEGU/1-124	H0Z1N0.1 PF01092.17;Ribosomal_S6e;	95.2	1.1e-62
TRINITY_DN17935_c0_g1	B9HNY6_POPTR/220-499	B9HNY6.2 PF01513.19;NAD_kinase;	84.3	4e-137
TRINITY_DN17940_c0_g4	A0A0E0JY02_ORYPU/50-207	A0A0E0JY02.1 PF00190.20;Cupin_1;	94.2	4e-80
TRINITY_DN17940_c0_g6	D7TGZ0_VITVI/13-262	D7TGZ0.1 PF08543.10;Phos_pyr_kin;	97.8	3.6e-15
TRINITY_DN17940_c0_g7	ACTG_EMENI/2-375	P20359.2 PF00022.17;Actin;	100	2.7e-14
TRINITY_DN17941_c0_g1	W9R2L6_9ROSA/109-171	W9R2L6.1 PF05180.10;zf-DNL;	66.7	8.9e-20
TRINITY_DN17943_c0_g1	V4TH94_9ROSI/2-133	V4TH94.1 PF00293.26;NUDIX;	63	1.2e-43
TRINITY_DN17943_c0_g2	A0A067JF41_JATCU/1827-2029	A0A067JF41.1 PF08146.10;BP28CT;	54.5	4.5e-59
TRINITY_DN17943_c0_g4	M0TLV2_MUSAM/220-287	M0TLV2.1 PF01066.19;CDP-OH_P_transf;	85.3	1.7e-26
TRINITY_DN17947_c0_g1	A0A067KM17_JATCU/8-189	A0A067KM17.1 PF00857.18;Isochorismatase;	79.7	4.3e-78
TRINITY_DN17948_c1_g3	A0A059AEP6_EUCGR/687-1081	A0A059AEP6.1 PF00899.19;ThiF;	83	1.7e-191
TRINITY_DN1794_c0_g1	A0A015L4V8_9GLOM/311-398	A0A015L4V8.1 PF13813.4;MBOAT_2;	81.8	4.1e-19
TRINITY_DN17952_c0_g2	D7SKF2_VITVI/128-176	D7SKF2.1 PF13041.4;PPR_2;	57.1	1.5e-09
TRINITY_DN17952_c1_g1	A0A059AYV5_EUCGR/137-369	A0A059AYV5.1 PF00561.18;Abhydrolase_1;	59.5	6.2e-06
TRINITY_DN17953_c1_g1	A0A0D3E075_BRAOL/1-38	A0A0D3E075.1 PF06220.10;zf-U1;	94.7	4.1e-14
TRINITY_DN17953_c1_g2	A0A022PTI7_ERYGU/1-140	A0A022PTI7.1 PF04116.11;FA_hydroxylase;	72.1	8.4e-56
TRINITY_DN17953_c1_g3	A0A0B0MSG3_GOSAR/111-205	A0A0B0MSG3.1 PF13180.4;PDZ_2;	70.7	1.9e-24
TRINITY_DN17953_c1_g4	W9QM41_9ROSA/275-341	W9QM41.1 PF00462.22;Glutaredoxin;	66.2	5.6e-18
TRINITY_DN17954_c1_g1	A0A022RL19_ERYGU/139-311	A0A022RL19.1 PF01764.23;Lipase_3;	66.5	2.5e-53
TRINITY_DN17954_c1_g3	D7TJR3_VITVI/38-253	D7TJR3.1 PF00230.18;MIP;	82.1	7.8e-37
TRINITY_DN17954_c1_g4	A0A067GNK9_CITSI/151-240	A0A067GNK9.1 PF01293.18;PEPCK_ATP;	93.2	4.1e-15
TRINITY_DN17956_c0_g2	A0A022R7N8_ERYGU/86-311	A0A022R7N8.1 PF07859.11;Abhydrolase_3;	79.4	1.4e-79
TRINITY_DN17956_c0_g3	A0A067DU85_CITSI/77-223	A0A067DU85.1 PF07859.11;Abhydrolase_3;	96.4	4.3e-27
TRINITY_DN17960_c0_g1	V4TDA4_9ROSI/7-102	V4TDA4.1 PF01158.16;Ribosomal_L36e;	91.7	1.2e-41
TRINITY_DN17960_c0_g3	V4TDA4_9ROSI/7-102	V4TDA4.1 PF01158.16;Ribosomal_L36e;	94.8	5.9e-43
TRINITY_DN17960_c0_g4	V4TDA4_9ROSI/7-102	V4TDA4.1 PF01158.16;Ribosomal_L36e;	92.5	4e-35
TRINITY_DN17962_c0_g1	W9QYD3_9ROSA/78-349	W9QYD3.1 PF00487.22;FA_desaturase;	62.9	2.6e-50
TRINITY_DN17962_c0_g2	A0A022RIE9_ERYGU/72-344	A0A022RIE9.1 PF00487.22;FA_desaturase;	70.5	3.1e-33
TRINITY_DN17963_c0_g3	M1BB14_SOLTU/21-161	M1BB14.1 PF04043.13;PMEI;	64.2	1.3e-38
TRINITY_DN17965_c0_g2	A0A0D2P5J7_GOSRA/22-103	A0A0D2P5J7.1 PF04683.11;Proteasom_Rpn13;	82.9	8.2e-34
TRINITY_DN17967_c0_g1	G3JHC2_CORMM/44-102	G3JHC2.1 PF12678.5;zf-rbx1;	94.9	2.7e-29
TRINITY_DN17967_c0_g5	G3JHC2_CORMM/44-102	G3JHC2.1 PF12678.5;zf-rbx1;	93.2	8.2e-29
TRINITY_DN17967_c0_g8	F6HK56_VITVI/17-290	F6HK56.1 PF00069.23;Pkinase;	58.8	1.9e-91
TRINITY_DN17967_c0_g9	G3JHC2_CORMM/44-102	G3JHC2.1 PF12678.5;zf-rbx1;	94.9	2e-29
TRINITY_DN17972_c0_g1	A0A067EJV2_CITSI/14-113	A0A067EJV2.1 PF16455.3;UBD;	85	8.7e-45
TRINITY_DN17972_c3_g1	F6GWB2_VITVI/18-88	F6GWB2.1 PF15159.4;PIG-Y;	77.1	4.1e-23
TRINITY_DN17977_c0_g1	F6HCE1_VITVI/771-1048	F6HCE1.1 PF00069.23;Pkinase;	63.7	1.1e-91
TRINITY_DN17977_c0_g2	V4SW11_9ROSI/699-999	V4SW11.1 PF07714.15;Pkinase_Tyr;	56.5	9e-06
TRINITY_DN17980_c0_g1	A9PD02_POPTR/15-294	A9PD02.1 PF04321.15;RmlD_sub_bind;	90	8e-148
TRINITY_DN17980_c0_g3	M1C6S2_SOLTU/169-233	M1C6S2.1 PF00013.27;KH_1;	86.2	1.1e-21
TRINITY_DN17980_c0_g5	A9PD02_POPTR/15-294	A9PD02.1 PF04321.15;RmlD_sub_bind;	88.2	5.9e-145
TRINITY_DN17981_c2_g1	F6HHG1_VITVI/91-166	F6HHG1.1 PF00111.25;Fer2;	81.6	9.5e-32
TRINITY_DN17981_c2_g2	M1A5C8_SOLTU/62-137	M1A5C8.1 PF00111.25;Fer2;	85.3	4e-30
TRINITY_DN17982_c0_g8	K4C9C6_SOLLC/49-342	K4C9C6.1 PF00850.17;Hist_deacetyl;	82.5	1.3e-20
TRINITY_DN17983_c1_g3	A0A0E0PRJ8_ORYRU/753-911	A0A0E0PRJ8.1 PF00071.20;Ras;	98.1	1.8e-90
TRINITY_DN17983_c1_g4	A0A0E0PRJ8_ORYRU/753-911	A0A0E0PRJ8.1 PF00071.20;Ras;	95.5	1.7e-61
TRINITY_DN17986_c0_g1	D7SS04_VITVI/3-100	D7SS04.1 PF08555.8;DUF1754;	62.2	1.1e-21
TRINITY_DN17987_c0_g1	W5LQY3_ASTMX/1-167	W5LQY3.1 PF00838.15;TCTP;	94.6	7.6e-85
TRINITY_DN17988_c0_g2	J3KYZ6_ORYBR/334-476	J3KYZ6.1 PF02773.14;S-AdoMet_synt_C;	92.3	6.6e-74
TRINITY_DN17988_c0_g3	B9RN65_RICCO/117-238	B9RN65.1 PF02772.14;S-AdoMet_synt_M;	94.8	1.9e-59
TRINITY_DN17988_c0_g5	I1NBG9_SOYBN/242-383	I1NBG9.1 PF02773.14;S-AdoMet_synt_C;	94.5	1e-64
TRINITY_DN17989_c0_g1	M5WG91_PRUPE/192-352	M5WG91.1 PF00350.21;Dynamin_N;	88.8	6.9e-81
TRINITY_DN17990_c0_g2	A0A067KIH5_JATCU/87-140	A0A067KIH5.1 PF01381.20;HTH_3;	96.3	1.7e-19
TRINITY_DN17990_c0_g4	A0A0A0K488_CUCSA/104-499	A0A0A0K488.1 PF00202.19;Aminotran_3;	88.9	4.1e-208
TRINITY_DN17991_c0_g2	A0A067JKW8_JATCU/3-74	A0A067JKW8.1 PF14327.4;CSTF2_hinge;	71.2	2.1e-16
TRINITY_DN17993_c0_g1	F6H3F4_VITVI/41-157	F6H3F4.1 PF01426.16;BAH;	65.8	1.2e-41
TRINITY_DN18000_c0_g3	W9SBK9_9ROSA/34-75	W9SBK9.1 PF08263.10;LRRNT_2;	87.8	1.1e-14
TRINITY_DN18002_c0_g1	B9S5Q3_RICCO/5-126	B9S5Q3.1 PF02291.13;TFIID-31kDa;	84.4	1.7e-52
TRINITY_DN18002_c0_g3	K4BN34_SOLLC/31-491	K4BN34.1 PF00067.20;p450;	82.2	5.9e-229
TRINITY_DN18003_c2_g3	A0A022Q0I7_ERYGU/201-451	A0A022Q0I7.1 PF15742.3;DUF4686;	46.1	4.5e-32
TRINITY_DN18007_c0_g1	A2YGP5_ORYSI/65-247	A2YGP5.1 PF00270.27;DEAD;	96.4	3.1e-55
TRINITY_DN18008_c0_g1	A0A059ABJ7_EUCGR/30-217	A0A059ABJ7.1 PF02902.17;Peptidase_C48;	60.9	1.2e-60
TRINITY_DN18008_c0_g2	W9RXZ5_9ROSA/23-562	W9RXZ5.1 PF01193.22;RNA_pol_L;	50	4.6e-23
TRINITY_DN18008_c0_g4	M1BPI1_SOLTU/444-687	M1BPI1.1 PF00078.25;RVT_1;	77.9	1.1e-32
TRINITY_DN18008_c0_g5	M1BPI1_SOLTU/444-687	M1BPI1.1 PF00078.25;RVT_1;	62.3	5.8e-23
TRINITY_DN18009_c0_g1	M5WT55_PRUPE/92-215	M5WT55.1 PF07889.10;DUF1664;	79.8	1.2e-35
TRINITY_DN18010_c0_g10	W9S939_9ROSA/228-296	W9S939.1 PF00462.22;Glutaredoxin;	82.6	8.1e-25
TRINITY_DN18010_c0_g8	B9RUQ1_RICCO/269-337	B9RUQ1.1 PF00462.22;Glutaredoxin;	84.1	6.7e-25
TRINITY_DN18012_c0_g1	V7C5V4_PHAVU/193-452	V7C5V4.1 PF00201.16;UDPGT;	69.6	3.8e-23
TRINITY_DN18012_c0_g2	A0A061E105_THECC/91-450	A0A061E105.1 PF00201.16;UDPGT;	71.6	5.8e-66
TRINITY_DN18012_c0_g3	A0A022RC14_ERYGU/224-271	A0A022RC14.1 PF00400.30;WD40;	83.3	9.8e-18
TRINITY_DN18012_c0_g5	A0A0D9VVM5_9ORYZ/227-274	A0A0D9VVM5.1 PF00400.30;WD40;	97.9	2.7e-21
TRINITY_DN18014_c1_g1	A0A0D3E3F9_BRAOL/203-314	A0A0D3E3F9.1 PF00954.18;S_locus_glycop;	37.4	3.2e-10
TRINITY_DN18014_c2_g1	W9RMM6_9ROSA/401-457	W9RMM6.1 PF05383.15;La;	68.4	8.1e-14
TRINITY_DN18015_c1_g1	A9PG99_POPTR/8-84	A9PG99.1 PF13417.4;GST_N_3;	71.4	1.8e-25
TRINITY_DN18016_c1_g2	M1B217_SOLTU/8-553	M1B217.1 PF00862.17;Sucrose_synth;	83.2	2.4e-82
TRINITY_DN18016_c1_g4	A0A022RRC9_ERYGU/2-182	A0A022RRC9.1 PF00227.24;Proteasome;	87	9.9e-65
TRINITY_DN18018_c0_g3	D8SHC1_SELML/165-313	D8SHC1.1 PF00004.27;AAA;	92.6	1.1e-75
TRINITY_DN18018_c0_g4	F6GUY8_VITVI/476-808	F6GUY8.1 PF01103.21;Bac_surface_Ag;	90.4	5.5e-179
TRINITY_DN18021_c1_g1	A0A059CN73_EUCGR/142-212	A0A059CN73.1 PF00076.20;RRM_1;	91.5	4.2e-31
TRINITY_DN18022_c1_g1	V7AEY9_PHAVU/190-339	V7AEY9.1 PF00190.20;Cupin_1;	88	3e-71
TRINITY_DN18022_c1_g4	B9IAN1_POPTR/109-181	B9IAN1.2 PF00076.20;RRM_1;	91.8	4.8e-31
TRINITY_DN18022_c1_g6	B9IAN1_POPTR/109-181	B9IAN1.2 PF00076.20;RRM_1;	94.5	1.4e-32
TRINITY_DN18023_c0_g2	M5W7G1_PRUPE/123-187	M5W7G1.1 PF00808.21;CBFD_NFYB_HMF;	47.7	2e-09
TRINITY_DN18024_c1_g2	D7L2T0_ARALL/274-311	D7L2T0.1 PF00400.30;WD40;	86.8	3.9e-12
TRINITY_DN18025_c0_g1	A0A059AWL2_EUCGR/122-250	A0A059AWL2.1 PF05542.9;DUF760;	73.4	7.1e-48
TRINITY_DN18025_c1_g1	A0A061DZ70_THECC/523-802	A0A061DZ70.1 PF07714.15;Pkinase_Tyr;	82.1	1.1e-130
TRINITY_DN18025_c1_g3	A0A067KAN4_JATCU/110-496	A0A067KAN4.1 PF03514.12;GRAS;	81.4	3e-69
TRINITY_DN18025_c1_g7	F6HSS8_VITVI/114-493	F6HSS8.1 PF03514.12;GRAS;	82.5	1.8e-111
TRINITY_DN18025_c1_g9	A0A096Q5M8_MAIZE/14-76	A0A096Q5M8.1 PF00280.16;potato_inhibit;	62.3	3.6e-15
TRINITY_DN18026_c0_g1	U5FW56_POPTR/12-432	U5FW56.1 PF00201.16;UDPGT;	48.7	7.7e-106
TRINITY_DN18027_c1_g1	A5AIH8_VITVI/4-719	A5AIH8.1 PF06075.10;DUF936;	61.5	4.1e-122
TRINITY_DN18027_c1_g2	A0A022RIE9_ERYGU/72-344	A0A022RIE9.1 PF00487.22;FA_desaturase;	66.7	1.5e-116
TRINITY_DN18027_c1_g3	A0A0J8CP68_BETVU/11-66	A0A0J8CP68.1 PF11960.6;DUF3474;	57.4	1.5e-12
TRINITY_DN18027_c1_g8	K4C9Y8_SOLLC/374-746	K4C9Y8.1 PF03514.12;GRAS;	74.3	2.2e-160
TRINITY_DN18027_c1_g9	M1A3N7_SOLTU/6-67	M1A3N7.1 PF11960.6;DUF3474;	56.5	1.3e-14
TRINITY_DN18028_c1_g3	I1JBB1_SOYBN/715-988	I1JBB1.1 PF00664.21;ABC_membrane;	100	1.8e-31
TRINITY_DN18029_c1_g6	I1MLW1_SOYBN/255-406	I1MLW1.1 PF03283.11;PAE;	42.9	5.3e-06
TRINITY_DN18033_c0_g1	K4CDP6_SOLLC/45-113	K4CDP6.1 PF12265.6;CAF1C_H4-bd;	79.7	1.1e-25
TRINITY_DN18034_c1_g1	A0A067F360_CITSI/81-234	A0A067F360.1 PF00650.18;CRAL_TRIO;	73.4	2.6e-65
TRINITY_DN18034_c1_g3	A0A087SCP9_AUXPR/199-389	A0A087SCP9.1 PF01636.21;APH;	75.3	8.8e-78
TRINITY_DN18036_c1_g1	A0A0A0LNE9_CUCSA/54-252	A0A0A0LNE9.1 PF00106.23;adh_short;	88.9	3.7e-96
TRINITY_DN18036_c1_g3	M1AYA9_SOLTU/54-213	M1AYA9.1 PF00106.23;adh_short;	84.3	1.9e-60
TRINITY_DN18039_c0_g2	M1BLG1_SOLTU/122-392	M1BLG1.1 PF00069.23;Pkinase;	77.3	1.1e-11
TRINITY_DN18039_c0_g4	M5WWN0_PRUPE/147-443	M5WWN0.1 PF00069.23;Pkinase;	78.5	6.6e-33
TRINITY_DN18039_c0_g5	A0A067KU50_JATCU/144-434	A0A067KU50.1 PF00069.23;Pkinase;	92.6	2.5e-151
TRINITY_DN18040_c0_g4	B9GV12_POPTR/149-193	B9GV12.1 PF13639.4;zf-RING_2;	95.6	9.8e-20
TRINITY_DN18041_c0_g4	F6H6I6_VITVI/78-349	F6H6I6.1 PF00069.23;Pkinase;	71.1	2.1e-53
TRINITY_DN18042_c0_g1	S9X3R9_9CETA/7-191	S9X3R9.1 PF01251.16;Ribosomal_S7e;	92.2	1.2e-82
TRINITY_DN18042_c0_g2	W5P5T8_SHEEP/1-171	W5P5T8.1 PF01251.16;Ribosomal_S7e;	100	1.3e-77
TRINITY_DN18045_c2_g2	H2ZWM9_LATCH/4-506	H2ZWM9.1 PF05091.10;eIF-3_zeta;	95.2	1.7e-41
TRINITY_DN18045_c2_g3	H2L7H5_ORYLA/4-524	H2L7H5.1 PF05091.10;eIF-3_zeta;	94.6	1.4e-134
TRINITY_DN18046_c0_g1	G7IEF5_MEDTR/11-232	G7IEF5.2 PF02567.14;PhzC-PhzF;	75.7	7.2e-25
TRINITY_DN18047_c2_g2	W5LMY2_ASTMX/36-190	W5LMY2.1 PF02518.24;HATPase_c;	97.3	4.2e-34
TRINITY_DN18047_c3_g2	A0A0D2NRZ2_GOSRA/97-149	A0A0D2NRZ2.1 PF14853.4;Fis1_TPR_C;	83	3.2e-17
TRINITY_DN18048_c0_g2	E5SLF9_TRISP/25-245	E5SLF9.1 PF00091.23;Tubulin;	92.6	1.9e-30
TRINITY_DN18049_c0_g1	A0A0J8D0Q5_BETVU/34-189	A0A0J8D0Q5.1 PF04115.10;Ureidogly_lyase;	64.5	4.8e-51
TRINITY_DN18049_c0_g2	A0A059AUS9_EUCGR/15-444	A0A059AUS9.1 PF00201.16;UDPGT;	44.4	3.5e-54
TRINITY_DN18049_c0_g4	A0A067L9Z4_JATCU/10-435	A0A067L9Z4.1 PF00201.16;UDPGT;	47.5	1.1e-118
TRINITY_DN18049_c0_g5	A0A059AV25_EUCGR/15-443	A0A059AV25.1 PF00201.16;UDPGT;	40.3	7.9e-17
TRINITY_DN18050_c0_g3	C6T0W7_SOYBN/5-163	C6T0W7.1 PF05907.11;DUF866;	47.6	3.4e-56
TRINITY_DN18050_c0_g4	D6BRE7_JATCU/5-163	D6BRE7.1 PF05907.11;DUF866;	53.2	1.5e-42
TRINITY_DN18050_c0_g7	M1AJR1_SOLTU/70-189	M1AJR1.1 PF03479.13;DUF296;	63.9	3.5e-35
TRINITY_DN18050_c0_g8	D7SZG6_VITVI/16-93	D7SZG6.1 PF09340.8;NuA4;	79.5	1.7e-26
TRINITY_DN18050_c0_g9	M0TQC7_MUSAM/195-309	M0TQC7.1 PF02338.17;OTU;	82.5	7.5e-53
TRINITY_DN18052_c0_g1	U5GMJ1_POPTR/69-282	U5GMJ1.1 PF00106.23;adh_short;	72.7	2.4e-28
TRINITY_DN18054_c0_g1	A0A067KBI3_JATCU/42-270	A0A067KBI3.1 PF02230.14;Abhydrolase_2;	77.7	1.4e-105
TRINITY_DN18054_c0_g3	M1AP20_SOLTU/81-396	M1AP20.1 PF03016.13;Exostosin;	79.4	1.3e-141
TRINITY_DN18057_c0_g4	A0A0A0KIG8_CUCSA/15-394	A0A0A0KIG8.1 PF05631.12;MFS_5;	58.7	4.1e-124
TRINITY_DN18057_c0_g6	B9HEZ4_POPTR/49-120	B9HEZ4.2 PF13450.4;NAD_binding_8;	78.8	2.4e-20
TRINITY_DN18057_c0_g7	A0A067EQM7_CITSI/133-475	A0A067EQM7.1 PF07156.12;Prenylcys_lyase;	74.2	5.2e-142
TRINITY_DN18058_c0_g1	A0A067KNQ9_JATCU/58-361	A0A067KNQ9.1 PF01008.15;IF-2B;	83.2	1.7e-133
TRINITY_DN18059_c0_g1	D7TNM5_VITVI/108-376	D7TNM5.1 PF00270.27;DEAD;	64.8	2.9e-88
TRINITY_DN18060_c0_g1	F6HS69_VITVI/496-857	F6HS69.1 PF04685.11;DUF608;	87.8	9.8e-191
TRINITY_DN18060_c0_g2	F6HS69_VITVI/496-857	F6HS69.1 PF04685.11;DUF608;	88.5	3.5e-113
TRINITY_DN18060_c0_g4	I1LCH2_SOYBN/534-895	I1LCH2.2 PF04685.11;DUF608;	84.7	7.6e-70
TRINITY_DN18061_c0_g2	S8CR12_9LAMI/75-383	S8CR12.1 PF02383.16;Syja_N;	80.3	1.2e-155
TRINITY_DN18061_c0_g4	A0A067KKW8_JATCU/92-206	A0A067KKW8.1 PF03479.13;DUF296;	83.5	1.5e-48
TRINITY_DN18062_c0_g1	S8E006_9LAMI/9-120	S8E006.1 PF00072.22;Response_reg;	69.3	5e-28
TRINITY_DN18064_c0_g1	L7MZL4_ANOCA/27-103	L7MZL4.1 PF01253.20;SUI1;	96.1	9.5e-36
TRINITY_DN18065_c1_g2	A0A059DIA9_EUCGR/2-69	A0A059DIA9.1 PF00226.29;DnaJ;	70.6	5.1e-21
TRINITY_DN18067_c0_g1	A0A061EMS8_THECC/434-523	A0A061EMS8.1 PF05003.10;DUF668;	76.7	8e-33
TRINITY_DN18067_c0_g2	M5X6V6_PRUPE/30-186	M5X6V6.1 PF04043.13;PMEI;	64.3	1.2e-50
TRINITY_DN18067_c0_g4	A0A061EMS8_THECC/434-523	A0A061EMS8.1 PF05003.10;DUF668;	76.7	4.6e-33
TRINITY_DN18067_c0_g5	A0A0J8CPK5_BETVU/413-502	A0A0J8CPK5.1 PF05003.10;DUF668;	71.9	4.8e-29
TRINITY_DN18068_c0_g1	M5Y4E3_PRUPE/161-605	M5Y4E3.1 PF01457.14;Peptidase_M8;	88.8	5.8e-122
TRINITY_DN18069_c1_g2	B0BMV5_RAT/10-171	B0BMV5.1 PF00071.20;Ras;	100	2.8e-37
TRINITY_DN18069_c2_g3	A0A022Q4D2_ERYGU/11-97	A0A022Q4D2.1 PF03101.13;FAR1;	93.1	2.4e-41
TRINITY_DN18071_c0_g1	A0A087G706_ARAAL/42-234	A0A087G706.1 PF03798.14;TRAM_LAG1_CLN8;	62.2	4.8e-61
TRINITY_DN18071_c1_g2	B9RG61_RICCO/7-53	B9RG61.1 PF05680.10;ATP-synt_E;	87.2	4.5e-12
TRINITY_DN18072_c0_g2	B9H869_POPTR/5-70	B9H869.1 PF01423.20;LSM;	93.8	4.5e-27
TRINITY_DN18072_c1_g1	A0A061FWP5_THECC/246-311	A0A061FWP5.1 PF00191.18;Annexin;	87.9	1.2e-24
TRINITY_DN18072_c1_g7	B9H869_POPTR/5-70	B9H869.1 PF01423.20;LSM;	95.5	2.5e-28
TRINITY_DN18072_c1_g8	M0TDN5_MUSAM/89-113	M0TDN5.1 PF06943.10;zf-LSD1;	92	3e-07
TRINITY_DN18073_c0_g3	I1NBG9_SOYBN/242-383	I1NBG9.1 PF02773.14;S-AdoMet_synt_C;	100	4.4e-78
TRINITY_DN18073_c0_g7	A0A058ZY94_EUCGR/3-99	A0A058ZY94.1 PF00438.18;S-AdoMet_synt_N;	94.9	7.5e-25
TRINITY_DN18074_c3_g3	I1JPS0_SOYBN/13-79	I1JPS0.1 PF00230.18;MIP;	100	1.2e-12
TRINITY_DN18075_c1_g1	E7CEX8_CUCSA/233-289	E7CEX8.1 PF03106.13;WRKY;	83.9	2.4e-21
TRINITY_DN18078_c2_g2	A0A067LB04_JATCU/59-167	A0A067LB04.1 PF04398.10;DUF538;	82.7	5.4e-46
TRINITY_DN18078_c2_g4	I1MYV4_SOYBN/76-304	I1MYV4.1 PF01269.15;Fibrillarin;	42.2	2.8e-25
TRINITY_DN18079_c0_g1	K4D9F1_SOLLC/191-244	K4D9F1.1 PF13821.4;DUF4187;	77.5	1.3e-11
TRINITY_DN18080_c0_g2	A0A0D2X404_CAPO3/618-742	A0A0D2X404.1 PF13364.4;BetaGal_dom4_5;	45.7	3.2e-28
TRINITY_DN18082_c2_g1	M1A5F5_SOLTU/74-177	M1A5F5.1 PF03168.11;LEA_2;	78.8	2e-43
TRINITY_DN18082_c3_g3	B9H6Y5_POPTR/16-336	B9H6Y5.2 PF16913.3;PUNUT;	74.1	5.4e-19
TRINITY_DN18082_c3_g4	A0A067LBE6_JATCU/18-340	A0A067LBE6.1 PF16913.3;PUNUT;	76.2	4.1e-110
TRINITY_DN18082_c3_g6	B9RJS5_RICCO/17-337	B9RJS5.1 PF16913.3;PUNUT;	71.9	4.4e-53
TRINITY_DN18082_c3_g7	A0A0A0LPJ9_CUCSA/16-344	A0A0A0LPJ9.1 PF16913.3;PUNUT;	74.4	1.9e-13
TRINITY_DN18087_c1_g2	A0A0A0LGF2_CUCSA/177-451	A0A0A0LGF2.1 PF00928.19;Adap_comp_sub;	86.8	5.1e-96
TRINITY_DN18087_c1_g4	K4CRL0_SOLLC/28-269	K4CRL0.1 PF00139.17;Lectin_legB;	60.2	4.4e-79
TRINITY_DN18091_c2_g4	K4B6I2_SOLLC/56-79	K4B6I2.1 PF12874.5;zf-met;	100	2e-06
TRINITY_DN18092_c0_g1	M1ATJ6_SOLTU/1-197	M1ATJ6.1 PF01902.15;Diphthami_syn_2;	84.4	7.2e-91
TRINITY_DN18094_c0_g1	V7AF18_PHAVU/102-154	V7AF18.1 PF14570.4;zf-RING_4;	86.8	8.8e-24
TRINITY_DN18094_c0_g5	A0A067JY38_JATCU/11-152	A0A067JY38.1 PF02519.12;Auxin_inducible;	53.5	6e-34
TRINITY_DN18094_c0_g6	V7B7I8_PHAVU/105-156	V7B7I8.1 PF12906.5;RINGv;	82.7	5.4e-19
TRINITY_DN18095_c0_g1	K4CDF5_SOLLC/15-259	K4CDF5.1 PF03114.16;BAR;	80.5	3.6e-28
TRINITY_DN18097_c1_g2	M5WLC6_PRUPE/181-482	M5WLC6.1 PF13872.4;AAA_34;	85.1	7.6e-152
TRINITY_DN18097_c1_g3	A0A022QJ59_ERYGU/621-910	A0A022QJ59.1 PF13871.4;Helicase_C_4;	62.4	3.4e-44
TRINITY_DN18097_c1_g5	M1BSD0_SOLTU/196-270	M1BSD0.1 PF00626.20;Gelsolin;	72	1.2e-27
TRINITY_DN18098_c0_g2	F2EFN3_HORVD/18-60	F2EFN3.1 PF01439.16;Metallothio_2;	58.1	3e-07
TRINITY_DN18098_c1_g1	I1LGN8_SOYBN/14-95	I1LGN8.1 PF02991.14;Atg8;	100	4.1e-14
TRINITY_DN18098_c1_g2	F2SU31_TRIRC/13-116	F2SU31.1 PF02991.14;Atg8;	97.8	2e-42
TRINITY_DN18100_c0_g5	W9RL40_9ROSA/5-95	W9RL40.1 PF00676.18;E1_dh;	92.9	1.8e-35
TRINITY_DN18102_c0_g3	A0A022R2D5_ERYGU/88-348	A0A022R2D5.1 PF02485.19;Branch;	89.9	1.2e-92
TRINITY_DN18104_c1_g1	M1BII8_SOLTU/69-140	M1BII8.1 PF04640.12;PLATZ;	79.2	1.9e-25
TRINITY_DN18104_c1_g2	A0A0D2SEA6_GOSRA/26-84	A0A0D2SEA6.1 PF02701.13;zf-Dof;	92.9	9.5e-26
TRINITY_DN18104_c1_g3	W9R285_9ROSA/6-214	W9R285.1 PF01370.19;Epimerase;	76.1	5.5e-45
TRINITY_DN18104_c1_g4	A0A0D2S6M0_GOSRA/4-158	A0A0D2S6M0.1 PF03079.12;ARD;	87.1	1.7e-80
TRINITY_DN18105_c0_g1	D7U1H9_VITVI/81-449	D7U1H9.1 PF03969.14;AFG1_ATPase;	77.2	3.6e-37
TRINITY_DN18105_c0_g2	M5XEI6_PRUPE/80-447	M5XEI6.1 PF03969.14;AFG1_ATPase;	85.7	2.9e-30
TRINITY_DN18109_c0_g3	A0A067EW02_CITSI/282-334	A0A067EW02.1 PF13833.4;EF-hand_8;	79.2	1.6e-16
TRINITY_DN18109_c0_g4	B9R793_RICCO/4-442	B9R793.1 PF02458.13;Transferase;	61.9	1.8e-161
TRINITY_DN18110_c0_g2	A0A087HBQ3_ARAAL/344-526	A0A087HBQ3.1 PF17177.2;PPR_long;	51.6	1.4e-25
TRINITY_DN18110_c0_g3	A0A022RD28_ERYGU/142-425	A0A022RD28.1 PF00331.18;Glyco_hydro_10;	55.3	1e-07
TRINITY_DN18111_c0_g1	I1KK59_SOYBN/71-198	I1KK59.1 PF00043.23;GST_C;	85.9	2.8e-61
TRINITY_DN18112_c0_g1	A0A087GVB2_ARAAL/80-325	A0A087GVB2.1 PF07727.12;RVT_2;	50	9.2e-12
TRINITY_DN18112_c2_g2	L5KPS1_PTEAL/10-147	L5KPS1.1 PF00071.20;Ras;	100	1.5e-17
TRINITY_DN18112_c3_g1	F2CUP5_HORVD/10-171	F2CUP5.1 PF00071.20;Ras;	92.6	2.6e-79
TRINITY_DN18112_c4_g1	W9R7S4_9ROSA/100-403	W9R7S4.1 PF01869.18;BcrAD_BadFG;	57.4	3.8e-09
TRINITY_DN18113_c0_g1	A0A0A0LSJ3_CUCSA/34-92	A0A0A0LSJ3.1 PF02701.13;zf-Dof;	96.6	1e-28
TRINITY_DN18113_c0_g2	A0A067FQG5_CITSI/53-111	A0A067FQG5.1 PF02701.13;zf-Dof;	98	4.5e-25
TRINITY_DN18113_c0_g3	A0A0D2UFK5_GOSRA/44-102	A0A0D2UFK5.1 PF02701.13;zf-Dof;	94.6	4.1e-27
TRINITY_DN18113_c0_g6	A0A022PVS2_ERYGU/23-505	A0A022PVS2.1 PF00083.22;Sugar_tr;	81.7	8.9e-232
TRINITY_DN18115_c0_g1	M0SN94_MUSAM/80-296	M0SN94.1 PF13460.4;NAD_binding_10;	78.8	9e-93
TRINITY_DN18116_c0_g1	A0A067GF87_CITSI/759-1049	A0A067GF87.1 PF00176.21;SNF2_N;	88	1.2e-145
TRINITY_DN18116_c1_g1	A0A0D2TUL6_GOSRA/170-215	A0A0D2TUL6.1 PF02234.17;CDI;	84.8	1.7e-14
TRINITY_DN18117_c0_g2	K4AVM8_SOLLC/5-71	K4AVM8.1 PF00035.24;dsrm;	61.2	2.6e-16
TRINITY_DN18118_c0_g2	V4TVM7_9ROSI/9-83	V4TVM7.1 PF00179.24;UQ_con;	96.9	1.2e-28
TRINITY_DN18119_c0_g1	G7I3L4_MEDTR/251-461	G7I3L4.1 PF01501.18;Glyco_transf_8;	84.4	4.3e-102
TRINITY_DN18119_c0_g2	B9GNW7_POPTR/10-269	B9GNW7.1 PF04278.10;Tic22;	65.9	9.7e-83
TRINITY_DN18120_c1_g1	V4TFR5_9ROSI/215-336	V4TFR5.1 PF00954.18;S_locus_glycop;	52.6	1.9e-18
TRINITY_DN18120_c2_g1	D7THV1_VITVI/28-111	D7THV1.1 PF00626.20;Gelsolin;	86.9	4.7e-38
TRINITY_DN18120_c2_g2	A0A015K910_9GLOM/161-227	A0A015K910.1 PF00505.17;HMG_box;	88.1	3.8e-26
TRINITY_DN18121_c0_g1	F6H1D0_VITVI/70-427	F6H1D0.1 PF09766.7;FimP;	74.5	2.2e-100
TRINITY_DN18123_c0_g1	A0A0J8CVH8_BETVU/53-312	A0A0J8CVH8.1 PF01564.15;Spermine_synth;	81.2	1.9e-126
TRINITY_DN18125_c3_g10	A0A0A0KLE3_CUCSA/294-555	A0A0A0KLE3.1 PF01803.14;LIM_bind;	69.6	1.1e-14
TRINITY_DN18125_c3_g13	A0A0A0L6F2_CUCSA/290-551	A0A0A0L6F2.1 PF01803.14;LIM_bind;	77	2.4e-91
TRINITY_DN18129_c0_g3	A0A061GNB3_THECC/1135-1366	A0A061GNB3.1 PF10513.7;EPL1;	66.2	2.1e-84
TRINITY_DN18132_c1_g1	D7TY71_VITVI/30-302	D7TY71.1 PF01459.20;Porin_3;	86.6	6.3e-86
TRINITY_DN18136_c2_g1	R0G2X5_9BRAS/51-199	R0G2X5.1 PF04652.14;Vta1;	73.2	8e-55
TRINITY_DN18138_c0_g1	F4J010_ARATH/21-267	F4J010.1 PF02230.14;Abhydrolase_2;	96.4	2.5e-08
TRINITY_DN18138_c0_g2	C0P7K2_MAIZE/89-152	C0P7K2.1 PF02230.14;Abhydrolase_2;	60.9	6.1e-08
TRINITY_DN18139_c0_g1	D7THQ9_VITVI/10-161	D7THQ9.1 PF00179.24;UQ_con;	92.4	1.3e-45
TRINITY_DN18139_c0_g2	A0A059AWI5_EUCGR/452-848	A0A059AWI5.1 PF00503.18;G-alpha;	68.5	2e-162
TRINITY_DN18139_c0_g5	B9T188_RICCO/140-262	B9T188.1 PF13456.4;RVT_3;	39.8	3.1e-18
TRINITY_DN18139_c0_g6	K4BW09_SOLLC/269-354	K4BW09.1 PF01388.19;ARID;	73.4	1.6e-22
TRINITY_DN18140_c0_g1	E0CRW7_VITVI/21-315	E0CRW7.1 PF00206.18;Lyase_1;	86.7	6.1e-53
TRINITY_DN18140_c0_g5	A0A078C3V5_BRANA/40-205	A0A078C3V5.1 PF12146.6;Hydrolase_4;	73.5	1.8e-62
TRINITY_DN18142_c0_g1	B9I976_POPTR/68-307	B9I976.1 PF06966.10;DUF1295;	71.4	2.1e-55
TRINITY_DN18143_c1_g2	V4V7V7_9ROSI/9-117	V4V7V7.1 PF02365.13;NAM;	56.4	7e-30
TRINITY_DN18143_c1_g4	A0A067JQK2_JATCU/6-322	A0A067JQK2.1 PF04258.11;Peptidase_A22B;	82.3	1.1e-146
TRINITY_DN18144_c0_g2	F1REB6_DANRE/189-425	F1REB6.1 PF02578.13;Cu-oxidase_4;	89.4	1.1e-53
TRINITY_DN18144_c0_g3	F1REB6_DANRE/189-425	F1REB6.1 PF02578.13;Cu-oxidase_4;	84.1	6.5e-58
TRINITY_DN18150_c0_g1	A0A0D2S519_GOSRA/22-88	A0A0D2S519.1 PF04716.12;ETC_C1_NDUFA5;	92.5	6.5e-28
TRINITY_DN18150_c0_g2	W9SDW7_9ROSA/196-296	W9SDW7.1 PF03171.18;2OG-FeII_Oxy;	80.2	9.7e-43
TRINITY_DN18150_c0_g3	A0A0D2S519_GOSRA/22-88	A0A0D2S519.1 PF04716.12;ETC_C1_NDUFA5;	95.5	3.5e-29
TRINITY_DN18150_c0_g4	A0A022RZR3_ERYGU/125-155	A0A022RZR3.1 PF01535.18;PPR;	83.9	3.9e-06
TRINITY_DN18150_c0_g9	A0A0D2S519_GOSRA/22-88	A0A0D2S519.1 PF04716.12;ETC_C1_NDUFA5;	95.5	6.9e-29
TRINITY_DN18151_c0_g1	G7J3U5_MEDTR/29-154	G7J3U5.1 PF01477.21;PLAT;	82.5	1.1e-58
TRINITY_DN18153_c2_g2	B9MTV7_POPTR/74-355	B9MTV7.1 PF07714.15;Pkinase_Tyr;	80.2	2.1e-55
TRINITY_DN18154_c1_g4	M4E1V8_BRARP/101-397	M4E1V8.1 PF09728.7;Taxilin;	75.5	2.6e-104
TRINITY_DN18155_c0_g1	A0A0D2PZ83_GOSRA/134-325	A0A0D2PZ83.1 PF04427.16;Brix;	85.3	4e-89
TRINITY_DN18156_c0_g1	A0A022R302_ERYGU/257-359	A0A022R302.1 PF01399.25;PCI;	78.6	3.2e-39
TRINITY_DN18157_c1_g2	A0A067K2B6_JATCU/4-138	A0A067K2B6.1 PF02966.14;DIM1;	80	4.7e-57
TRINITY_DN18159_c1_g1	V4S4K9_9ROSI/3-95	V4S4K9.1 PF03501.13;S10_plectin;	91.1	5.9e-43
TRINITY_DN18159_c1_g2	V7AZ86_PHAVU/252-500	V7AZ86.1 PF01697.25;Glyco_transf_92;	58.4	1e-43
TRINITY_DN18160_c0_g2	A0A0A0K694_CUCSA/193-306	A0A0A0K694.1 PF02148.17;zf-UBP;	78.1	1.1e-49
TRINITY_DN18160_c0_g4	M5WRR2_PRUPE/79-178	M5WRR2.1 PF07576.10;BRAP2;	89.5	7.2e-45
TRINITY_DN18161_c0_g4	A0A0A0KZC2_CUCSA/7-144	A0A0A0KZC2.1 PF03870.13;RNA_pol_Rpb8;	56.3	5.6e-36
TRINITY_DN18161_c0_g8	A0A061G4L0_THECC/81-263	A0A061G4L0.1 PF00574.21;CLP_protease;	89.1	7.7e-91
TRINITY_DN18163_c0_g1	M5WTB9_PRUPE/31-124	M5WTB9.1 PF02359.16;CDC48_N;	80.9	3.5e-38
TRINITY_DN18163_c0_g2	K4C9L4_SOLLC/518-651	K4C9L4.1 PF00004.27;AAA;	97.5	4.3e-62
TRINITY_DN18163_c0_g3	A0A067JQH0_JATCU/694-961	A0A067JQH0.1 PF00069.23;Pkinase;	86.4	5e-125
TRINITY_DN18163_c0_g6	W2QZZ8_PHYPN/236-366	W2QZZ8.1 PF00004.27;AAA;	92.4	2.4e-62
[truncated: 15,668 more rows]
