# Supplementary material for: Drought Stress Stimulates the Terpenoid Backbone and Triterpenoid Biosynthesis Pathway to Promote the Synthesis of Saikosaponin in Bupleurum chinense DC. Roots
Source: Molecules. 2022 Aug 25;27(17):5470. doi: 10.3390/molecules27175470 (PMC9457724; doi:10.3390/molecules27175470)
Supplement: Supplementary file 1 [file molecules-27-05470-s001.zip › Supplementary Material. Table S5. swissprot_annotation.xlsx]

## Sheet: Sheet1
Query	swissprot_hit	swissprot_gene_name	swissprot_description	swissprot_identity	swissprot_evalue
TRINITY_DN10009_c0_g1	sp|P41099|RLA2_PARAR	-	60S acidic ribosomal protein P2 OS=Parthenium argentatum PE=3 SV=1	75.8	3.2e-21
TRINITY_DN1000_c0_g1	sp|Q9SW96|SYNC1_ARATH	SYNC1	Asparagine--tRNA ligase, cytoplasmic 1 OS=Arabidopsis thaliana GN=SYNC1 PE=1 SV=1	86.7	1.5e-24
TRINITY_DN10012_c0_g1	sp|Q9LTX2|TIR1L_ARATH	At5g49980	Transport inhibitor response 1-like protein OS=Arabidopsis thaliana GN=At5g49980 PE=2 SV=1	57.1	6.3e-18
TRINITY_DN10015_c0_g1	sp|Q84Q83|TOC75_ORYSJ	TOC75	Protein TOC75, chloroplastic OS=Oryza sativa subsp. japonica GN=TOC75 PE=2 SV=2	100	1.8e-49
TRINITY_DN1002_c0_g1	sp|Q64FN9|CAPSD_WCCVB	-	Capsid protein OS=White clover cryptic virus 1 (isolate Boccardo/2004) PE=3 SV=1	52.6	5e-120
TRINITY_DN10037_c0_g1	sp|Q0JF58|AGO4B_ORYSJ	AGO4B	Protein argonaute 4B OS=Oryza sativa subsp. japonica GN=AGO4B PE=2 SV=1	100	2.3e-42
TRINITY_DN10053_c0_g1	sp|P11024|NNTM_BOVIN	NNT	NAD(P) transhydrogenase, mitochondrial OS=Bos taurus GN=NNT PE=1 SV=3	93.8	1.2e-10
TRINITY_DN10055_c0_g1	sp|P34334|RL21_CAEEL	rpl-21	60S ribosomal protein L21 OS=Caenorhabditis elegans GN=rpl-21 PE=3 SV=3	76.8	2.5e-25
TRINITY_DN1007_c0_g1	sp|O80470|GDL38_ARATH	At2g23540	GDSL esterase/lipase At2g23540 OS=Arabidopsis thaliana GN=At2g23540 PE=2 SV=1	69.3	1.1e-158
TRINITY_DN10111_c0_g1	sp|P30042|ES1_HUMAN	C21orf33	ES1 protein homolog, mitochondrial OS=Homo sapiens GN=C21orf33 PE=1 SV=3	66.4	2.3e-35
TRINITY_DN10134_c0_g1	sp|Q8L981|APC13_ARATH	APC13	Anaphase-promoting complex subunit 13 OS=Arabidopsis thaliana GN=APC13 PE=1 SV=1	67.7	2.4e-17
TRINITY_DN10140_c0_g1	sp|P32296|P5CS_VIGAC	-	Delta-1-pyrroline-5-carboxylate synthase OS=Vigna aconitifolia PE=2 SV=1	94.1	1.4e-30
TRINITY_DN10158_c0_g1	sp|Q9M8D3|PUR4_ARATH	At1g74260	Probable phosphoribosylformylglycinamidine synthase, chloroplastic/mitochondrial OS=Arabidopsis thaliana GN=At1g74260 PE=2 SV=3	78.9	8.5e-32
TRINITY_DN10165_c0_g1	sp|Q9SUM2|RUXF_ARATH	At4g30220	Probable small nuclear ribonucleoprotein F OS=Arabidopsis thaliana GN=At4g30220 PE=2 SV=1	90.6	8.6e-22
TRINITY_DN10165_c0_g2	sp|Q3T0Z8|RUXF_BOVIN	SNRPF	Small nuclear ribonucleoprotein F OS=Bos taurus GN=SNRPF PE=3 SV=2	100	8.3e-37
TRINITY_DN10169_c0_g1	sp|P34066|PSA1A_ARATH	PAF1	Proteasome subunit alpha type-1-A OS=Arabidopsis thaliana GN=PAF1 PE=1 SV=3	71.8	2.2e-23
TRINITY_DN10174_c0_g1	sp|C0LGF4|FEI1_ARATH	FEI1	LRR receptor-like serine/threonine-protein kinase FEI 1 OS=Arabidopsis thaliana GN=FEI1 PE=1 SV=1	76.3	4.8e-29
TRINITY_DN10180_c0_g1	sp|Q96453|1433D_SOYBN	GF14D	14-3-3-like protein D OS=Glycine max GN=GF14D PE=2 SV=1	78.8	4.1e-24
TRINITY_DN10184_c0_g1	sp|Q95M18|ENPL_BOVIN	HSP90B1	Endoplasmin OS=Bos taurus GN=HSP90B1 PE=2 SV=1	100	3e-15
TRINITY_DN10188_c0_g1	sp|Q2F7J3|POL_XMRV3	gag-pol	Gag-Pol polyprotein OS=Xenotropic MuLV-related virus (isolate VP35) GN=gag-pol PE=1 SV=1	39.1	2.4e-06
TRINITY_DN10189_c0_g2	sp|Q6L4S0|DDB1_ORYSJ	DBB1	DNA damage-binding protein 1 OS=Oryza sativa subsp. japonica GN=DBB1 PE=1 SV=1	100	4.3e-35
TRINITY_DN1018_c0_g1	sp|Q32P78|RPAB5_BOVIN	POLR2L	DNA-directed RNA polymerases I, II, and III subunit RPABC5 OS=Bos taurus GN=POLR2L PE=1 SV=1	100	1.6e-33
TRINITY_DN10196_c0_g1	sp|Q9SSK9|MLP28_ARATH	MLP28	MLP-like protein 28 OS=Arabidopsis thaliana GN=MLP28 PE=1 SV=1	44.9	2.1e-15
TRINITY_DN10212_c0_g1	sp|Q9FX94|CXE5_ARATH	CXE5	Probable carboxylesterase 5 OS=Arabidopsis thaliana GN=CXE5 PE=2 SV=1	54.5	1.4e-10
TRINITY_DN1021_c0_g1	sp|P56381|ATP5E_HUMAN	ATP5E	ATP synthase subunit epsilon, mitochondrial OS=Homo sapiens GN=ATP5E PE=1 SV=2	100	6.6e-21
TRINITY_DN10236_c0_g1	sp|Q9SQT8|DHQSD_ARATH	EMB3004	Bifunctional 3-dehydroquinate dehydratase/shikimate dehydrogenase, chloroplastic OS=Arabidopsis thaliana GN=EMB3004 PE=1 SV=1	68.4	1.2e-24
TRINITY_DN10239_c0_g1	sp|Q5RFH0|ATP5L_PONAB	ATP5L	ATP synthase subunit g, mitochondrial OS=Pongo abelii GN=ATP5L PE=3 SV=1	75.9	1.4e-16
TRINITY_DN10261_c0_g1	sp|P48504|QCR6_SOLTU	-	Cytochrome b-c1 complex subunit 6 OS=Solanum tuberosum PE=1 SV=2	75.4	5.7e-26
TRINITY_DN10275_c0_g1	sp|Q9MBD8|BI1_ORYSJ	BI1	Bax inhibitor 1 OS=Oryza sativa subsp. japonica GN=BI1 PE=2 SV=1	100	1.1e-30
TRINITY_DN10281_c0_g1	sp|A2ZVI7|CDPK1_ORYSJ	CPK1	Calcium-dependent protein kinase 1 OS=Oryza sativa subsp. japonica GN=CPK1 PE=2 SV=1	100	4.5e-35
TRINITY_DN10300_c0_g1	sp|Q9FNR1|RBG3_ARATH	RBG3	Glycine-rich RNA-binding protein 3, mitochondrial OS=Arabidopsis thaliana GN=RBG3 PE=2 SV=1	47.5	8.9e-09
TRINITY_DN10356_c0_g1	sp|P08317|IL8_CHICK	CXCL8	Interleukin-8 OS=Gallus gallus GN=CXCL8 PE=2 SV=1	49.3	5.3e-14
TRINITY_DN10359_c0_g1	sp|P17980|PRS6A_HUMAN	PSMC3	26S protease regulatory subunit 6A OS=Homo sapiens GN=PSMC3 PE=1 SV=3	100	4e-37
TRINITY_DN10381_c0_g1	sp|Q08DN7|VAV_BOVIN	VAV1	Proto-oncogene vav OS=Bos taurus GN=VAV1 PE=2 SV=1	65.8	5.6e-22
TRINITY_DN103_c0_g1	sp|Q9MIY3|NU3M_DANRE	mt-nd3	NADH-ubiquinone oxidoreductase chain 3 OS=Danio rerio GN=mt-nd3 PE=3 SV=1	89.5	2.3e-35
TRINITY_DN10426_c0_g1	sp|Q9BY84|DUS16_HUMAN	DUSP16	Dual specificity protein phosphatase 16 OS=Homo sapiens GN=DUSP16 PE=1 SV=1	72.4	3e-13
TRINITY_DN1042_c0_g1	sp|Q61JR3|GLC7A_CAEBR	gsp-1	Serine/threonine-protein phosphatase PP1-alpha OS=Caenorhabditis briggsae GN=gsp-1 PE=3 SV=1	85.5	2.4e-30
TRINITY_DN1045_c0_g1	sp|O23372|ATXR3_ARATH	ATXR3	Histone-lysine N-methyltransferase ATXR3 OS=Arabidopsis thaliana GN=ATXR3 PE=2 SV=2	88	2.2e-38
TRINITY_DN10494_c0_g1	sp|Q56WK6|PATL1_ARATH	PATL1	Patellin-1 OS=Arabidopsis thaliana GN=PATL1 PE=1 SV=2	61.4	5e-08
TRINITY_DN10521_c0_g1	sp|Q15233|NONO_HUMAN	NONO	Non-POU domain-containing octamer-binding protein OS=Homo sapiens GN=NONO PE=1 SV=4	84.8	2.3e-07
TRINITY_DN10538_c0_g1	sp|Q966C6|RL7A_CAEEL	rpl-7A	60S ribosomal protein L7a OS=Caenorhabditis elegans GN=rpl-7A PE=1 SV=3	68.8	4.2e-23
TRINITY_DN10575_c0_g1	sp|B8B8C5|ALFL9_ORYSI	OsI_26819	PHD finger protein ALFIN-LIKE 9 OS=Oryza sativa subsp. indica GN=OsI_26819 PE=3 SV=1	78.5	5.3e-26
TRINITY_DN10576_c0_g2	sp|Q6UZG0|RS29_HIPCM	rps29	40S ribosomal protein S29 OS=Hippocampus comes GN=rps29 PE=3 SV=3	98.2	1.4e-28
TRINITY_DN10601_c0_g1	sp|Q8BGF9|S2544_MOUSE	Slc25a44	Solute carrier family 25 member 44 OS=Mus musculus GN=Slc25a44 PE=1 SV=1	36	2e-10
TRINITY_DN10603_c0_g1	sp|Q5ZIQ3|HNRPK_CHICK	HNRNPK	Heterogeneous nuclear ribonucleoprotein K OS=Gallus gallus GN=HNRNPK PE=2 SV=1	86	8.5e-17
TRINITY_DN10622_c0_g1	sp|Q75LL6|TADA2_ORYSJ	ADA2	Transcriptional adapter ADA2 OS=Oryza sativa subsp. japonica GN=ADA2 PE=2 SV=2	100	3e-30
TRINITY_DN10622_c0_g2	sp|Q75LL6|TADA2_ORYSJ	ADA2	Transcriptional adapter ADA2 OS=Oryza sativa subsp. japonica GN=ADA2 PE=2 SV=2	100	1.6e-37
TRINITY_DN1065_c0_g1	sp|H2DH21|C7A29_PANGI	-	Cytochrome P450 CYP72A219 OS=Panax ginseng PE=2 SV=1	50	1.6e-16
TRINITY_DN1067_c0_g1	sp|Q61941|NNTM_MOUSE	Nnt	NAD(P) transhydrogenase, mitochondrial OS=Mus musculus GN=Nnt PE=1 SV=2	63	6.5e-23
TRINITY_DN10680_c0_g1	sp|O81062|SIP_ARATH	SPP	Signal peptide peptidase OS=Arabidopsis thaliana GN=SPP PE=2 SV=1	82.4	3e-16
TRINITY_DN106_c0_g1	sp|Q943I6|STOP1_ORYSJ	Os01g0871200	Zinc finger protein STOP1 homolog OS=Oryza sativa subsp. japonica GN=Os01g0871200 PE=2 SV=1	97.5	7.9e-14
TRINITY_DN10717_c0_g3	sp|Q99798|ACON_HUMAN	ACO2	Aconitate hydratase, mitochondrial OS=Homo sapiens GN=ACO2 PE=1 SV=2	81.2	2.1e-43
TRINITY_DN1072_c0_g1	sp|Q08047|GLGB_MAIZE	SBE1	1,4-alpha-glucan-branching enzyme 2, chloroplastic/amyloplastic OS=Zea mays GN=SBE1 PE=1 SV=1	54.3	1e-17
TRINITY_DN10764_c0_g1	sp|P82264|DHE3_CHAAC	glud1	Glutamate dehydrogenase, mitochondrial OS=Chaenocephalus aceratus GN=glud1 PE=1 SV=1	96.5	1.9e-42
TRINITY_DN10778_c0_g1	sp|Q8W487|YB95_ARATH	At2g39795	Uncharacterized protein At2g39795, mitochondrial OS=Arabidopsis thaliana GN=At2g39795 PE=1 SV=1	65	4.4e-13
TRINITY_DN10779_c0_g1	sp|O07576|YHDG_BACSU	yhdG	Uncharacterized amino acid permease YhdG OS=Bacillus subtilis (strain 168) GN=yhdG PE=2 SV=1	44.3	5.2e-09
TRINITY_DN10811_c0_g1	sp|Q67ZF6|ACFR3_ARATH	CYB561C	Probable transmembrane ascorbate ferrireductase 3 OS=Arabidopsis thaliana GN=CYB561C PE=2 SV=1	59.8	1.7e-68
TRINITY_DN10812_c0_g1	sp|P11491|PPB_YEAST	PHO8	Repressible alkaline phosphatase OS=Saccharomyces cerevisiae (strain ATCC 204508 / S288c) GN=PHO8 PE=1 SV=2	47.1	1.7e-11
TRINITY_DN10815_c0_g1	sp|P14854|CX6B1_HUMAN	COX6B1	Cytochrome c oxidase subunit 6B1 OS=Homo sapiens GN=COX6B1 PE=1 SV=2	100	4.7e-49
TRINITY_DN10830_c0_g1	sp|Q8GYD1|PDI51_ARATH	PDIL5-1	Protein disulfide-isomerase 5-1 OS=Arabidopsis thaliana GN=PDIL5-1 PE=2 SV=1	70.9	1.1e-17
TRINITY_DN10839_c0_g1	sp|P35282|RAB21_MOUSE	Rab21	Ras-related protein Rab-21 OS=Mus musculus GN=Rab21 PE=1 SV=4	94.8	7.5e-38
TRINITY_DN10849_c0_g1	sp|Q8H1H9|AMO_ARATH	At1g62810	Primary amine oxidase OS=Arabidopsis thaliana GN=At1g62810 PE=2 SV=1	73.1	2.9e-25
TRINITY_DN1085_c0_g1	sp|Q41745|LPAT_MAIZE	PLS1	1-acyl-sn-glycerol-3-phosphate acyltransferase PLS1 OS=Zea mays GN=PLS1 PE=2 SV=1	76.4	2.9e-17
TRINITY_DN10871_c0_g1	sp|O81832|Y4729_ARATH	At4g27290	G-type lectin S-receptor-like serine/threonine-protein kinase At4g27290 OS=Arabidopsis thaliana GN=At4g27290 PE=3 SV=4	53.9	8.7e-21
TRINITY_DN10888_c0_g1	sp|P54153|MSRA_SOLLC	E4	Peptide methionine sulfoxide reductase (Fragment) OS=Solanum lycopersicum GN=E4 PE=3 SV=1	79.6	2e-87
TRINITY_DN1088_c0_g1	sp|A4FUI2|RUXE_BOVIN	SNRPE	Small nuclear ribonucleoprotein E OS=Bos taurus GN=SNRPE PE=3 SV=1	100	3.2e-32
TRINITY_DN10890_c0_g1	sp|Q8GXG1|ASPGB_ARATH	At3g16150	Probable isoaspartyl peptidase/L-asparaginase 2 OS=Arabidopsis thaliana GN=At3g16150 PE=2 SV=2	89.7	2.1e-28
TRINITY_DN10902_c0_g1	sp|P32292|ARG2_VIGRR	ARG2	Indole-3-acetic acid-induced protein ARG2 OS=Vigna radiata var. radiata GN=ARG2 PE=2 SV=1	75.4	4e-10
TRINITY_DN10904_c0_g1	sp|Q712K3|UB2R2_HUMAN	UBE2R2	Ubiquitin-conjugating enzyme E2 R2 OS=Homo sapiens GN=UBE2R2 PE=1 SV=1	100	9.7e-37
TRINITY_DN10910_c0_g1	sp|Q8WY07|CTR3_HUMAN	SLC7A3	Cationic amino acid transporter 3 OS=Homo sapiens GN=SLC7A3 PE=1 SV=1	81.1	4e-28
TRINITY_DN10928_c0_g1	sp|P35268|RL22_HUMAN	RPL22	60S ribosomal protein L22 OS=Homo sapiens GN=RPL22 PE=1 SV=2	100	2.3e-61
TRINITY_DN1092_c0_g1	sp|O60506|HNRPQ_HUMAN	SYNCRIP	Heterogeneous nuclear ribonucleoprotein Q OS=Homo sapiens GN=SYNCRIP PE=1 SV=2	95.1	1.3e-28
TRINITY_DN10932_c0_g1	sp|P07737|PROF1_HUMAN	PFN1	Profilin-1 OS=Homo sapiens GN=PFN1 PE=1 SV=2	100	8.3e-67
TRINITY_DN10986_c0_g2	sp|P41320|GLNA_SQUAC	-	Glutamine synthetase, mitochondrial OS=Squalus acanthias PE=2 SV=1	78.9	4.5e-10
TRINITY_DN1098_c0_g1	sp|Q6AWY6|GRF3_ORYSJ	GRF3	Growth-regulating factor 3 OS=Oryza sativa subsp. japonica GN=GRF3 PE=3 SV=2	98.5	2.9e-30
TRINITY_DN11012_c0_g1	sp|Q02921|NO93_SOYBN	-	Early nodulin-93 OS=Glycine max PE=2 SV=1	85.1	3.2e-23
TRINITY_DN11032_c0_g1	sp|O57683|SF3B1_XENLA	sf3b1	Splicing factor 3B subunit 1 OS=Xenopus laevis GN=sf3b1 PE=2 SV=1	80.5	5e-22
TRINITY_DN11034_c0_g1	sp|Q5REM8|TM205_PONAB	TMEM205	Transmembrane protein 205 OS=Pongo abelii GN=TMEM205 PE=2 SV=1	35.1	2.6e-21
TRINITY_DN1103_c0_g1	sp|Q42529|TRPA2_ARATH	TSA1	Tryptophan synthase alpha chain, chloroplastic OS=Arabidopsis thaliana GN=TSA1 PE=1 SV=1	89.9	9.1e-30
TRINITY_DN11041_c0_g1	sp|O04066|ACBP_RICCO	-	Acyl-CoA-binding protein OS=Ricinus communis PE=3 SV=1	86.7	2.1e-25
TRINITY_DN11045_c0_g1	sp|Q05024|TRI1_YEAST	TRI1	Protein TRI1 OS=Saccharomyces cerevisiae (strain ATCC 204508 / S288c) GN=TRI1 PE=1 SV=1	39.7	2.8e-11
TRINITY_DN11079_c0_g1	sp|O22823|LSM6B_ARATH	LSM6B	Sm-like protein LSM36B OS=Arabidopsis thaliana GN=LSM6B PE=1 SV=1	86.8	2.9e-40
TRINITY_DN11100_c1_g1	sp|Q3SX11|NSA2_BOVIN	NSA2	Ribosome biogenesis protein NSA2 homolog OS=Bos taurus GN=NSA2 PE=2 SV=1	96.3	2.3e-09
TRINITY_DN11148_c0_g1	sp|O22899|PRP43_ARATH	At2g47250	Probable pre-mRNA-splicing factor ATP-dependent RNA helicase DEAH3 OS=Arabidopsis thaliana GN=At2g47250 PE=2 SV=1	94.2	2.8e-36
TRINITY_DN11176_c0_g1	sp|P30182|TOP2_ARATH	TOP2	DNA topoisomerase 2 OS=Arabidopsis thaliana GN=TOP2 PE=2 SV=2	56	1.6e-16
TRINITY_DN11176_c0_g2	sp|P30182|TOP2_ARATH	TOP2	DNA topoisomerase 2 OS=Arabidopsis thaliana GN=TOP2 PE=2 SV=2	47.2	1.3e-12
TRINITY_DN11178_c0_g1	sp|Q9FYA6|BCAT5_ARATH	BCAT5	Branched-chain-amino-acid aminotransferase 5, chloroplastic OS=Arabidopsis thaliana GN=BCAT5 PE=1 SV=1	83.7	1.8e-35
TRINITY_DN11190_c0_g1	sp|Q99315|YG31B_YEAST	TY3B-G	Transposon Ty3-G Gag-Pol polyprotein OS=Saccharomyces cerevisiae (strain ATCC 204508 / S288c) GN=TY3B-G PE=1 SV=3	43.8	5.1e-08
TRINITY_DN1119_c0_g2	sp|P21357|AROF_SOLTU	SHKA	Phospho-2-dehydro-3-deoxyheptonate aldolase 1, chloroplastic OS=Solanum tuberosum GN=SHKA PE=1 SV=2	92.4	1.5e-36
TRINITY_DN11215_c0_g1	sp|Q0DWQ7|CCB12_ORYSJ	CYCB1-2	Cyclin-B1-2 OS=Oryza sativa subsp. japonica GN=CYCB1-2 PE=3 SV=1	93	1.1e-31
TRINITY_DN11338_c0_g3	sp|P14866|HNRPL_HUMAN	HNRNPL	Heterogeneous nuclear ribonucleoprotein L OS=Homo sapiens GN=HNRNPL PE=1 SV=2	94.5	4.9e-34
TRINITY_DN11394_c0_g1	sp|P13498|CY24A_HUMAN	CYBA	Cytochrome b-245 light chain OS=Homo sapiens GN=CYBA PE=1 SV=3	65.8	1.1e-23
TRINITY_DN11397_c0_g1	sp|Q9YGQ1|EF1B_CHICK	EEF1B	Elongation factor 1-beta OS=Gallus gallus GN=EEF1B PE=2 SV=3	85.4	1.1e-41
TRINITY_DN11397_c0_g2	sp|Q5E983|EF1B_BOVIN	EEF1B	Elongation factor 1-beta OS=Bos taurus GN=EEF1B PE=2 SV=3	90	1.4e-15
TRINITY_DN11439_c0_g1	sp|Q9SUT9|RTNLB_ARATH	RTNLB2	Reticulon-like protein B2 OS=Arabidopsis thaliana GN=RTNLB2 PE=1 SV=1	78.8	2.7e-23
TRINITY_DN11441_c0_g1	sp|Q9STN3|SPT51_ARATH	At4g08350	Putative transcription elongation factor SPT5 homolog 1 OS=Arabidopsis thaliana GN=At4g08350 PE=1 SV=2	75.7	5.1e-25
TRINITY_DN1144_c0_g1	sp|O04226|P5CS_ORYSJ	P5CS	Delta-1-pyrroline-5-carboxylate synthase OS=Oryza sativa subsp. japonica GN=P5CS PE=2 SV=2	100	5.8e-38
TRINITY_DN11459_c0_g1	sp|P10978|POLX_TOBAC	-	Retrovirus-related Pol polyprotein from transposon TNT 1-94 OS=Nicotiana tabacum PE=2 SV=1	47.2	4.7e-22
TRINITY_DN11470_c0_g1	sp|Q0J4I1|CKB21_ORYSJ	CDKB2-1	Cyclin-dependent kinase B2-1 OS=Oryza sativa subsp. japonica GN=CDKB2-1 PE=1 SV=1	100	7.7e-37
TRINITY_DN11521_c0_g1	sp|Q5VQ78|COB21_ORYSJ	Os06g0143900	Coatomer subunit beta'-1 OS=Oryza sativa subsp. japonica GN=Os06g0143900 PE=2 SV=1	100	2.6e-38
TRINITY_DN11536_c0_g1	sp|P36896|ACV1B_HUMAN	ACVR1B	Activin receptor type-1B OS=Homo sapiens GN=ACVR1B PE=1 SV=1	94	1.2e-34
TRINITY_DN11546_c0_g1	sp|P02902|ACP1_HORVU	ACL1.1	Acyl carrier protein 1, chloroplastic OS=Hordeum vulgare GN=ACL1.1 PE=1 SV=2	78.9	4.3e-24
TRINITY_DN11581_c0_g1	sp|Q9C5W7|TOM2A_ARATH	TOM2A	Tobamovirus multiplication protein 2A OS=Arabidopsis thaliana GN=TOM2A PE=1 SV=1	57.5	1.6e-19
TRINITY_DN11639_c0_g1	sp|Q9ZUX4|UMP2_ARATH	At2g27730	Uncharacterized protein At2g27730, mitochondrial OS=Arabidopsis thaliana GN=At2g27730 PE=1 SV=1	61.8	1.1e-07
TRINITY_DN11640_c0_g1	sp|Q60EA5|SCAM3_ORYSJ	SCAMP3	Secretory carrier-associated membrane protein 3 OS=Oryza sativa subsp. japonica GN=SCAMP3 PE=2 SV=1	98.7	1.2e-38
TRINITY_DN11644_c0_g1	sp|Q8HY02|CD209_SYMSY	CD209	CD209 antigen OS=Symphalangus syndactylus GN=CD209 PE=3 SV=1	31.7	3.4e-14
TRINITY_DN11660_c0_g1	sp|Q9ZNT0|VPS4_ARATH	SKD1	Protein SUPPRESSOR OF K(+) TRANSPORT GROWTH DEFECT 1 OS=Arabidopsis thaliana GN=SKD1 PE=1 SV=1	89.1	3.6e-40
TRINITY_DN11668_c0_g1	sp|Q9PRL8|ACBP_CHICK	DBI	Acyl-CoA-binding protein OS=Gallus gallus GN=DBI PE=1 SV=1	80.8	2e-29
TRINITY_DN11670_c0_g1	sp|A3KPR5|CYAC3_DANRE	cyb561a3	Cytochrome b ascorbate-dependent protein 3 OS=Danio rerio GN=cyb561a3 PE=2 SV=1	82.2	2.8e-30
TRINITY_DN11676_c0_g1	sp|Q75GA5|TIP41_ORYSJ	TIP4-1	Probable aquaporin TIP4-1 OS=Oryza sativa subsp. japonica GN=TIP4-1 PE=2 SV=1	100	3.8e-34
TRINITY_DN11684_c0_g1	sp|Q8R317|UBQL1_MOUSE	Ubqln1	Ubiquilin-1 OS=Mus musculus GN=Ubqln1 PE=1 SV=1	84.2	8.4e-20
TRINITY_DN11701_c0_g1	sp|Q10232|RL9A_SCHPO	rpl901	60S ribosomal protein L9-A OS=Schizosaccharomyces pombe (strain 972 / ATCC 24843) GN=rpl901 PE=3 SV=1	67.8	5.6e-16
TRINITY_DN11706_c0_g1	sp|Q0JNR2|CYT12_ORYSJ	Os01g0270100	Cysteine proteinase inhibitor 12 OS=Oryza sativa subsp. japonica GN=Os01g0270100 PE=2 SV=1	69.7	1.1e-25
TRINITY_DN11711_c0_g3	sp|Q5ZKW9|MBNL1_CHICK	MBNL1	Muscleblind-like protein 1 OS=Gallus gallus GN=MBNL1 PE=2 SV=1	88.3	1.3e-37
TRINITY_DN11745_c1_g1	sp|O89029|MATN4_MOUSE	Matn4	Matrilin-4 OS=Mus musculus GN=Matn4 PE=1 SV=1	61.3	4.8e-18
TRINITY_DN11752_c0_g1	sp|Q5BL57|AKIR1_XENTR	akirin1	Akirin-1 OS=Xenopus tropicalis GN=akirin1 PE=2 SV=1	70.1	2.7e-18
TRINITY_DN11773_c0_g1	sp|Q9JHB5|TSNAX_RAT	Tsnax	Translin-associated protein X OS=Rattus norvegicus GN=Tsnax PE=1 SV=1	36.6	1.1e-34
TRINITY_DN11774_c0_g1	sp|P04706|GLU2_MAIZE	-	Glutelin-2 OS=Zea mays PE=1 SV=1	100	4.4e-35
TRINITY_DN11782_c0_g1	sp|Q9SVE5|EXLA2_ARATH	EXLA2	Expansin-like A2 OS=Arabidopsis thaliana GN=EXLA2 PE=2 SV=1	68.9	3.2e-25
TRINITY_DN11804_c0_g1	sp|Q7X8H9|AI172_ORYSJ	Os07g0216700	17kDa alpha-amylase/trypsin inhibitor 2 OS=Oryza sativa subsp. japonica GN=Os07g0216700 PE=1 SV=1	100	1.5e-57
TRINITY_DN11815_c0_g1	sp|O65695|SAU50_ARATH	SAUR50	Auxin-responsive protein SAUR50 OS=Arabidopsis thaliana GN=SAUR50 PE=1 SV=1	70.9	9e-37
TRINITY_DN11819_c0_g1	sp|P20825|POL2_DROME	pol	Retrovirus-related Pol polyprotein from transposon 297 OS=Drosophila melanogaster GN=pol PE=3 SV=1	56.4	5.3e-25
TRINITY_DN11822_c0_g1	sp|Q42838|THN7_HORVU	-	Thionin BTH7 OS=Hordeum vulgare PE=2 SV=1	54.4	1.5e-17
TRINITY_DN11857_c0_g1	sp|Q9SLB6|LBD17_ARATH	LBD17	LOB domain-containing protein 17 OS=Arabidopsis thaliana GN=LBD17 PE=2 SV=1	84.6	2.2e-28
TRINITY_DN11863_c0_g1	sp|Q9NUB1|ACS2L_HUMAN	ACSS1	Acetyl-coenzyme A synthetase 2-like, mitochondrial OS=Homo sapiens GN=ACSS1 PE=1 SV=2	65.7	5.2e-25
TRINITY_DN11873_c0_g1	sp|Q8GYN5|RIN4_ARATH	RIN4	RPM1-interacting protein 4 OS=Arabidopsis thaliana GN=RIN4 PE=1 SV=1	85.2	1.4e-07
TRINITY_DN11876_c0_g1	sp|Q76I82|RS15A_BOVIN	RPS15A	40S ribosomal protein S15a OS=Bos taurus GN=RPS15A PE=2 SV=1	100	9.4e-71
TRINITY_DN11878_c0_g1	sp|P20411|FCERG_RAT	Fcer1g	High affinity immunoglobulin epsilon receptor subunit gamma OS=Rattus norvegicus GN=Fcer1g PE=1 SV=1	45.3	6.1e-10
TRINITY_DN11894_c0_g3	sp|O00567|NOP56_HUMAN	NOP56	Nucleolar protein 56 OS=Homo sapiens GN=NOP56 PE=1 SV=4	70.4	1e-20
TRINITY_DN11898_c0_g1	sp|P51074|ANX4_FRAAN	-	Annexin-like protein RJ4 OS=Fragaria ananassa PE=2 SV=2	76.1	2.3e-33
TRINITY_DN11898_c1_g1	sp|Q94CK4|ANXD8_ARATH	ANNAT8	Annexin D8 OS=Arabidopsis thaliana GN=ANNAT8 PE=2 SV=2	55.2	5.8e-13
TRINITY_DN11923_c0_g1	sp|P68512|FEL_CYPCA	-	Fish-egg lectin OS=Cyprinus carpio PE=1 SV=1	59.4	8.5e-19
TRINITY_DN11926_c0_g1	sp|Q86KL4|MCTS1_DICDI	mcts1	Malignant T-cell-amplified sequence 1 homolog OS=Dictyostelium discoideum GN=mcts1 PE=3 SV=1	60.3	5.6e-22
TRINITY_DN11935_c0_g1	sp|P48496|TPIC_SPIOL	TPIP1	Triosephosphate isomerase, chloroplastic OS=Spinacia oleracea GN=TPIP1 PE=1 SV=1	90.9	1.7e-41
TRINITY_DN1193_c0_g1	sp|Q9IBD8|PTPRC_CYPCA	ptprc	Receptor-type tyrosine-protein phosphatase C OS=Cyprinus carpio GN=ptprc PE=2 SV=1	100	2.8e-36
TRINITY_DN11942_c0_g3	sp|Q9M571|PEAMT_SPIOL	PEAMT	Phosphoethanolamine N-methyltransferase OS=Spinacia oleracea GN=PEAMT PE=1 SV=1	74.7	2.4e-28
TRINITY_DN11953_c0_g1	sp|Q9SN22|SCL32_ARATH	SCL32	Scarecrow-like protein 32 OS=Arabidopsis thaliana GN=SCL32 PE=2 SV=1	50	2.3e-12
TRINITY_DN11959_c0_g1	sp|Q20303|ELO6_CAEEL	elo-6	Elongation of very long chain fatty acids protein 6 OS=Caenorhabditis elegans GN=elo-6 PE=1 SV=1	48.1	3.4e-14
TRINITY_DN12011_c0_g1	sp|O82179|GCSH2_ARATH	GDH2	Glycine cleavage system H protein 2, mitochondrial OS=Arabidopsis thaliana GN=GDH2 PE=2 SV=1	84.1	1.9e-27
TRINITY_DN12016_c0_g1	sp|P79733|RIR2_DANRE	rrm2	Ribonucleoside-diphosphate reductase subunit M2 OS=Danio rerio GN=rrm2 PE=1 SV=1	100	2e-22
TRINITY_DN12016_c0_g2	sp|Q9LSD0|RIR2C_ARATH	TSO2	Ribonucleoside-diphosphate reductase small chain C OS=Arabidopsis thaliana GN=TSO2 PE=1 SV=1	86	1.3e-21
TRINITY_DN12016_c0_g3	sp|P79733|RIR2_DANRE	rrm2	Ribonucleoside-diphosphate reductase subunit M2 OS=Danio rerio GN=rrm2 PE=1 SV=1	100	6.5e-33
TRINITY_DN12082_c0_g2	sp|Q9SIV2|PSD2A_ARATH	RPN1A	26S proteasome non-ATPase regulatory subunit 2 homolog A OS=Arabidopsis thaliana GN=RPN1A PE=1 SV=2	79.5	6.8e-28
TRINITY_DN1209_c0_g1	sp|Q9FFR3|6PGD2_ARATH	At5g41670	6-phosphogluconate dehydrogenase, decarboxylating 2, chloroplastic OS=Arabidopsis thaliana GN=At5g41670 PE=1 SV=1	87.3	1.2e-33
TRINITY_DN12145_c0_g1	sp|Q40374|PR1_MEDTR	PR-1	Pathogenesis-related protein PR-1 OS=Medicago truncatula GN=PR-1 PE=2 SV=1	57.7	1.3e-42
TRINITY_DN12153_c0_g1	sp|Q9LV11|PMA11_ARATH	AHA11	ATPase 11, plasma membrane-type OS=Arabidopsis thaliana GN=AHA11 PE=1 SV=1	94.4	1.2e-34
TRINITY_DN12175_c0_g1	sp|Q9CQE7|ERGI3_MOUSE	Ergic3	Endoplasmic reticulum-Golgi intermediate compartment protein 3 OS=Mus musculus GN=Ergic3 PE=1 SV=1	63.3	1.5e-13
TRINITY_DN12176_c0_g1	sp|Q9LRP6|PP234_ARATH	At3g15590	Pentatricopeptide repeat-containing protein At3g15590, mitochondrial OS=Arabidopsis thaliana GN=At3g15590 PE=2 SV=1	50.6	3.9e-19
TRINITY_DN12192_c0_g1	sp|Q6PCR7|EIF3A_DANRE	eif3a	Eukaryotic translation initiation factor 3 subunit A OS=Danio rerio GN=eif3a PE=2 SV=1	100	3.4e-35
TRINITY_DN12203_c0_g1	sp|Q9SB64|NBR1_ARATH	NBR1	Protein NBR1 homolog OS=Arabidopsis thaliana GN=NBR1 PE=1 SV=1	73.2	2.6e-21
TRINITY_DN12243_c0_g1	sp|Q00531|JI60_HORVU	-	60 kDa jasmonate-induced protein OS=Hordeum vulgare PE=2 SV=1	24.6	2.2e-13
TRINITY_DN12247_c0_g1	sp|Q9LP51|CIPKI_ARATH	CIPK18	CBL-interacting serine/threonine-protein kinase 18 OS=Arabidopsis thaliana GN=CIPK18 PE=1 SV=1	79.3	5.6e-35
TRINITY_DN1224_c0_g2	sp|P25317|GSTXA_TOBAC	PARA	Probable glutathione S-transferase parA OS=Nicotiana tabacum GN=PARA PE=2 SV=1	69.3	1.1e-41
TRINITY_DN1228_c0_g1	sp|Q8SAY0|RK18_ORYSJ	RPL18	50S ribosomal protein L18, chloroplastic OS=Oryza sativa subsp. japonica GN=RPL18 PE=2 SV=1	100	1.2e-15
TRINITY_DN12309_c0_g2	sp|P04045|PHSL1_SOLTU	-	Alpha-1,4 glucan phosphorylase L-1 isozyme, chloroplastic/amyloplastic OS=Solanum tuberosum PE=1 SV=2	72.9	4.7e-26
TRINITY_DN12309_c0_g3	sp|P27598|PHSL_IPOBA	-	Alpha-1,4 glucan phosphorylase L isozyme, chloroplastic/amyloplastic OS=Ipomoea batatas PE=2 SV=1	60.5	1.6e-06
TRINITY_DN12327_c0_g1	sp|Q95LI9|PARK7_CHLAE	PARK7	Protein deglycase DJ-1 OS=Chlorocebus aethiops GN=PARK7 PE=2 SV=1	100	1.8e-30
TRINITY_DN12337_c0_g1	sp|F4JTP5|STY46_ARATH	STY46	Serine/threonine-protein kinase STY46 OS=Arabidopsis thaliana GN=STY46 PE=1 SV=1	75	2e-26
TRINITY_DN12337_c0_g3	sp|F4JTP5|STY46_ARATH	STY46	Serine/threonine-protein kinase STY46 OS=Arabidopsis thaliana GN=STY46 PE=1 SV=1	64.7	4.3e-24
TRINITY_DN1234_c0_g1	sp|Q9Z2H6|CLC4D_MOUSE	Clec4d	C-type lectin domain family 4 member D OS=Mus musculus GN=Clec4d PE=2 SV=1	100	7.5e-37
TRINITY_DN12350_c0_g2	sp|A8MQA3|PP330_ARATH	PCMP-H28	Pentatricopeptide repeat-containing protein At4g21065 OS=Arabidopsis thaliana GN=PCMP-H28 PE=2 SV=2	48.7	8e-16
TRINITY_DN12370_c0_g2	sp|P17801|KPRO_MAIZE	PK1	Putative receptor protein kinase ZmPK1 OS=Zea mays GN=PK1 PE=2 SV=2	67.6	8.3e-24
TRINITY_DN12373_c0_g1	sp|Q91061|S10I_ICTPU	-	Ictacalcin OS=Ictalurus punctatus PE=2 SV=1	73.8	9.8e-19
TRINITY_DN12373_c0_g2	sp|Q91061|S10I_ICTPU	-	Ictacalcin OS=Ictalurus punctatus PE=2 SV=1	71.8	1.3e-22
TRINITY_DN12393_c0_g1	sp|Q96288|BBX24_ARATH	BBX24	B-box zinc finger protein 24 OS=Arabidopsis thaliana GN=BBX24 PE=1 SV=1	65.5	1.4e-24
TRINITY_DN12413_c0_g1	sp|Q9LJ98|PFD2_ARATH	At3g22480	Probable prefoldin subunit 2 OS=Arabidopsis thaliana GN=At3g22480 PE=2 SV=1	73.4	4.9e-24
TRINITY_DN12417_c0_g1	sp|Q56YN8|SMC3_ARATH	SMC3	Structural maintenance of chromosomes protein 3 OS=Arabidopsis thaliana GN=SMC3 PE=2 SV=1	86.1	1.1e-27
TRINITY_DN12422_c0_g1	sp|O49203|NDK3_ARATH	NDPK3	Nucleoside diphosphate kinase III, chloroplastic/mitochondrial OS=Arabidopsis thaliana GN=NDPK3 PE=1 SV=1	87.3	6.7e-33
TRINITY_DN12423_c0_g1	sp|P47813|IF1AX_HUMAN	EIF1AX	Eukaryotic translation initiation factor 1A, X-chromosomal OS=Homo sapiens GN=EIF1AX PE=1 SV=2	98.3	2.2e-28
TRINITY_DN12428_c0_g2	sp|Q945B7|CRD1_EUPES	CRD1	Magnesium-protoporphyrin IX monomethyl ester [oxidative] cyclase, chloroplastic OS=Euphorbia esula GN=CRD1 PE=3 SV=1	83.3	8.7e-192
TRINITY_DN12434_c0_g1	sp|O22901|BH151_ARATH	UPB1	Transcription factor UPBEAT1 OS=Arabidopsis thaliana GN=UPB1 PE=2 SV=1	48.1	2.8e-11
TRINITY_DN12453_c0_g2	sp|P02140|HBB_CARAU	hbb	Hemoglobin subunit beta OS=Carassius auratus GN=hbb PE=1 SV=1	80.5	4.8e-34
TRINITY_DN12455_c0_g1	sp|Q62448|IF4G2_MOUSE	Eif4g2	Eukaryotic translation initiation factor 4 gamma 2 OS=Mus musculus GN=Eif4g2 PE=1 SV=2	79.2	7.3e-28
TRINITY_DN12468_c0_g1	sp|Q9SA85|BBE8_ARATH	At1g30700	Berberine bridge enzyme-like 8 OS=Arabidopsis thaliana GN=At1g30700 PE=2 SV=1	52.7	7.1e-17
TRINITY_DN12486_c0_g1	sp|Q60LV4|MYO3_CAEBR	myo-3	Myosin-3 OS=Caenorhabditis briggsae GN=myo-3 PE=3 SV=1	83.6	4.7e-29
TRINITY_DN124_c0_g1	sp|Q9NRZ5|PLCD_HUMAN	AGPAT4	1-acyl-sn-glycerol-3-phosphate acyltransferase delta OS=Homo sapiens GN=AGPAT4 PE=1 SV=1	43.1	1.1e-06
TRINITY_DN12512_c0_g1	sp|Q9LSQ4|GH36_ARATH	GH3.6	Indole-3-acetic acid-amido synthetase GH3.6 OS=Arabidopsis thaliana GN=GH3.6 PE=1 SV=1	63.4	8.2e-08
TRINITY_DN12530_c0_g1	sp|Q9SLX0|IMA1B_ORYSJ	Os05g0155601	Importin subunit alpha-1b OS=Oryza sativa subsp. japonica GN=Os05g0155601 PE=1 SV=2	76.6	4.1e-29
TRINITY_DN12550_c0_g1	sp|P46467|VPS4B_MOUSE	Vps4b	Vacuolar protein sorting-associated protein 4B OS=Mus musculus GN=Vps4b PE=1 SV=2	62.9	8.4e-19
TRINITY_DN12564_c0_g1	sp|P14671|TRPB1_ARATH	TSB1	Tryptophan synthase beta chain 1, chloroplastic OS=Arabidopsis thaliana GN=TSB1 PE=2 SV=1	86.7	1.1e-33
TRINITY_DN1256_c0_g1	sp|P86928|INTLP_ALLMI	-	Intelectin-like protein OS=Alligator mississippiensis PE=1 SV=1	51.5	6.2e-24
TRINITY_DN12586_c0_g1	sp|Q8GUM3|AAP5_ARATH	AAP5	Amino acid permease 5 OS=Arabidopsis thaliana GN=AAP5 PE=1 SV=1	59.5	6.2e-21
TRINITY_DN12594_c0_g1	sp|Q01628|IFM3_HUMAN	IFITM3	Interferon-induced transmembrane protein 3 OS=Homo sapiens GN=IFITM3 PE=1 SV=2	100	1.5e-37
TRINITY_DN12594_c0_g2	sp|Q01628|IFM3_HUMAN	IFITM3	Interferon-induced transmembrane protein 3 OS=Homo sapiens GN=IFITM3 PE=1 SV=2	100	5.5e-28
TRINITY_DN12594_c0_g3	sp|Q9CQW9|IFM3_MOUSE	Ifitm3	Interferon-induced transmembrane protein 3 OS=Mus musculus GN=Ifitm3 PE=1 SV=1	100	6.2e-40
TRINITY_DN12633_c0_g1	sp|Q8L7W2|NUDT8_ARATH	NUDT8	Nudix hydrolase 8 OS=Arabidopsis thaliana GN=NUDT8 PE=2 SV=2	56.8	2.2e-07
TRINITY_DN12636_c0_g2	sp|Q21215|GBLP_CAEEL	rack-1	Guanine nucleotide-binding protein subunit beta-2-like 1 OS=Caenorhabditis elegans GN=rack-1 PE=1 SV=3	86.8	2.5e-36
TRINITY_DN12643_c0_g1	sp|Q32LA7|H2AV_BOVIN	H2AFV	Histone H2A.V OS=Bos taurus GN=H2AFV PE=2 SV=3	100	4.2e-20
TRINITY_DN12653_c0_g1	sp|P47830|RL27A_XENLA	rpl27a	60S ribosomal protein L27a OS=Xenopus laevis GN=rpl27a PE=2 SV=2	85.5	1.5e-20
TRINITY_DN12653_c0_g2	sp|P47830|RL27A_XENLA	rpl27a	60S ribosomal protein L27a OS=Xenopus laevis GN=rpl27a PE=2 SV=2	83.7	1.7e-26
TRINITY_DN12671_c0_g1	sp|O23254|GLYC4_ARATH	SHM4	Serine hydroxymethyltransferase 4 OS=Arabidopsis thaliana GN=SHM4 PE=1 SV=1	89.6	1.7e-30
TRINITY_DN12711_c0_g1	sp|Q9M0X5|CRK25_ARATH	CRK25	Cysteine-rich receptor-like protein kinase 25 OS=Arabidopsis thaliana GN=CRK25 PE=3 SV=1	37.4	9.2e-40
TRINITY_DN12714_c0_g1	sp|B9F676|GLU2A_ORYSJ	Os03g0216600	Probable glucan 1,3-alpha-glucosidase OS=Oryza sativa subsp. japonica GN=Os03g0216600 PE=3 SV=1	100	7.6e-47
TRINITY_DN12720_c0_g1	sp|Q9XI60|LPP2_ARATH	LPP2	Lipid phosphate phosphatase 2 OS=Arabidopsis thaliana GN=LPP2 PE=2 SV=1	76.8	1.4e-19
TRINITY_DN12738_c0_g1	sp|Q9ZUS1|WTR13_ARATH	At2g37460	WAT1-related protein At2g37460 OS=Arabidopsis thaliana GN=At2g37460 PE=2 SV=1	65.8	4.3e-130
TRINITY_DN12765_c0_g1	sp|A5D8Q0|XIAP_XENLA	xiap	E3 ubiquitin-protein ligase XIAP OS=Xenopus laevis GN=xiap PE=2 SV=2	44.8	2.2e-09
TRINITY_DN12776_c0_g1	sp|Q6NVE9|PPTC7_MOUSE	Pptc7	Protein phosphatase PTC7 homolog OS=Mus musculus GN=Pptc7 PE=1 SV=1	87.5	7.8e-29
TRINITY_DN12788_c0_g1	sp|P27590|UROM_RAT	Umod	Uromodulin OS=Rattus norvegicus GN=Umod PE=2 SV=1	43.9	9.4e-06
TRINITY_DN12788_c1_g1	sp|Q61549|AGRE1_MOUSE	Adgre1	Adhesion G protein-coupled receptor E1 OS=Mus musculus GN=Adgre1 PE=1 SV=1	100	4.9e-39
TRINITY_DN12819_c0_g1	sp|P0DKK1|RL371_ORYSJ	Os01g0679700	60S ribosomal protein L37a-1 OS=Oryza sativa subsp. japonica GN=Os01g0679700 PE=1 SV=1	100	9.1e-47
TRINITY_DN12840_c0_g1	sp|Q9UDX4|S14L3_HUMAN	SEC14L3	SEC14-like protein 3 OS=Homo sapiens GN=SEC14L3 PE=1 SV=1	57.4	3.3e-27
TRINITY_DN12840_c0_g2	sp|P58875|S14L2_BOVIN	SEC14L2	SEC14-like protein 2 OS=Bos taurus GN=SEC14L2 PE=1 SV=2	70.3	2.2e-09
TRINITY_DN12883_c0_g1	sp|Q28021|ROCK2_BOVIN	ROCK2	Rho-associated protein kinase 2 OS=Bos taurus GN=ROCK2 PE=1 SV=1	87	2e-29
TRINITY_DN1289_c0_g1	sp|Q9LST7|PSB3_ORYSJ	PBC1	Proteasome subunit beta type-3 OS=Oryza sativa subsp. japonica GN=PBC1 PE=2 SV=1	100	1.4e-24
TRINITY_DN1290_c0_g1	sp|P08817|ACP2_HORVU	ACL1.2	Acyl carrier protein 2, chloroplastic OS=Hordeum vulgare GN=ACL1.2 PE=1 SV=2	76.5	2e-33
TRINITY_DN12940_c0_g1	sp|P29356|ALF_SPIOL	-	Fructose-bisphosphate aldolase, cytoplasmic isozyme OS=Spinacia oleracea PE=2 SV=1	85.7	5.4e-27
TRINITY_DN12943_c0_g1	sp|Q5Z9J0|MPK12_ORYSJ	MPK12	Mitogen-activated protein kinase 12 OS=Oryza sativa subsp. japonica GN=MPK12 PE=1 SV=2	100	1e-31
TRINITY_DN12944_c0_g1	sp|A1A4K8|U2AF1_BOVIN	U2AF1	Splicing factor U2AF 35 kDa subunit OS=Bos taurus GN=U2AF1 PE=2 SV=1	98.8	3e-45
TRINITY_DN12956_c0_g2	sp|P31583|RHN1_NICPL	RHN1	Ras-related protein RHN1 OS=Nicotiana plumbaginifolia GN=RHN1 PE=2 SV=1	90.9	2.1e-20
TRINITY_DN12960_c0_g1	sp|P00441|SODC_HUMAN	SOD1	Superoxide dismutase [Cu-Zn] OS=Homo sapiens GN=SOD1 PE=1 SV=2	100	3.3e-51
TRINITY_DN12962_c0_g1	sp|Q9FGT8|TIL_ARATH	TIL	Temperature-induced lipocalin-1 OS=Arabidopsis thaliana GN=TIL PE=1 SV=1	68.1	1.7e-19
TRINITY_DN12976_c0_g1	sp|Q9SIS4|IP5P9_ARATH	IP5P9	Type IV inositol polyphosphate 5-phosphatase 9 OS=Arabidopsis thaliana GN=IP5P9 PE=1 SV=1	67.8	5.4e-16
TRINITY_DN12979_c0_g1	sp|Q9VEW2|SERFL_DROME	CG17931	Putative SERF-like protein OS=Drosophila melanogaster GN=CG17931 PE=3 SV=1	65.2	3e-06
TRINITY_DN12997_c0_g1	sp|Q7ZV00|OTU6B_DANRE	otud6b	OTU domain-containing protein 6B OS=Danio rerio GN=otud6b PE=2 SV=1	36.5	2.5e-33
TRINITY_DN13007_c1_g1	sp|Q6XAT2|ERL2_ARATH	ERL2	LRR receptor-like serine/threonine-protein kinase ERL2 OS=Arabidopsis thaliana GN=ERL2 PE=2 SV=1	82.7	1.2e-32
TRINITY_DN13007_c1_g3	sp|C0LGW6|ERL1_ARATH	ERL1	LRR receptor-like serine/threonine-protein kinase ERL1 OS=Arabidopsis thaliana GN=ERL1 PE=1 SV=1	83.3	6.3e-32
TRINITY_DN13017_c0_g1	sp|Q8L751|ORP1C_ARATH	ORP1C	Oxysterol-binding protein-related protein 1C OS=Arabidopsis thaliana GN=ORP1C PE=2 SV=1	73.8	2.6e-31
TRINITY_DN13029_c0_g1	sp|F4ICD9|SC31A_ARATH	SEC31A	Protein transport protein SEC31 homolog A OS=Arabidopsis thaliana GN=SEC31A PE=1 SV=1	67.6	2.3e-17
TRINITY_DN13048_c0_g2	sp|Q9LD55|EIF3A_ARATH	TIF3A1	Eukaryotic translation initiation factor 3 subunit A OS=Arabidopsis thaliana GN=TIF3A1 PE=1 SV=1	76.5	6.6e-27
TRINITY_DN13098_c0_g1	sp|Q9FPT1|UBP12_ARATH	UBP12	Ubiquitin carboxyl-terminal hydrolase 12 OS=Arabidopsis thaliana GN=UBP12 PE=2 SV=2	80.6	5.8e-26
TRINITY_DN13109_c0_g1	sp|Q9SYP1|DEXHC_ARATH	BRR2A	DExH-box ATP-dependent RNA helicase DExH12 OS=Arabidopsis thaliana GN=BRR2A PE=1 SV=1	80.6	1.3e-28
TRINITY_DN13116_c0_g1	sp|Q6Z1Y6|SNAT2_ORYSJ	SNAT2	Serotonin N-acetyltransferase 2, chloroplastic OS=Oryza sativa subsp. japonica GN=SNAT2 PE=1 SV=1	59.3	1.6e-44
TRINITY_DN13118_c0_g1	sp|Q0WQX7|RBL1_ARATH	RBL1	RHOMBOID-like protein 1 OS=Arabidopsis thaliana GN=RBL1 PE=2 SV=1	77.9	1.5e-25
TRINITY_DN13121_c0_g1	sp|Q9SRX4|PME7_ARATH	PME7	Probable pectinesterase/pectinesterase inhibitor 7 OS=Arabidopsis thaliana GN=PME7 PE=2 SV=1	39.3	9.9e-06
TRINITY_DN13123_c0_g1	sp|P04146|COPIA_DROME	GIP	Copia protein OS=Drosophila melanogaster GN=GIP PE=1 SV=3	38.5	1.4e-10
TRINITY_DN13135_c0_g1	sp|P52907|CAZA1_HUMAN	CAPZA1	F-actin-capping protein subunit alpha-1 OS=Homo sapiens GN=CAPZA1 PE=1 SV=3	88.2	2.4e-31
TRINITY_DN13135_c0_g2	sp|P47753|CAZA1_MOUSE	Capza1	F-actin-capping protein subunit alpha-1 OS=Mus musculus GN=Capza1 PE=1 SV=4	85.1	9.5e-29
TRINITY_DN13141_c0_g1	sp|P98093|CO3_ONCMY	c3	Complement C3 (Fragment) OS=Oncorhynchus mykiss GN=c3 PE=1 SV=1	53.8	8.5e-50
TRINITY_DN13147_c0_g1	sp|Q9NYZ2|MFRN1_HUMAN	SLC25A37	Mitoferrin-1 OS=Homo sapiens GN=SLC25A37 PE=2 SV=2	76.3	8e-28
TRINITY_DN13147_c0_g2	sp|Q287T7|MFRN1_DANRE	slc25a37	Mitoferrin-1 OS=Danio rerio GN=slc25a37 PE=1 SV=1	78.9	9.5e-22
TRINITY_DN13147_c0_g3	sp|Q287T7|MFRN1_DANRE	slc25a37	Mitoferrin-1 OS=Danio rerio GN=slc25a37 PE=1 SV=1	97.6	3.9e-40
TRINITY_DN13179_c0_g2	sp|P51572|BAP31_HUMAN	BCAP31	B-cell receptor-associated protein 31 OS=Homo sapiens GN=BCAP31 PE=1 SV=3	100	5.2e-19
TRINITY_DN13207_c0_g1	sp|Q9SZL8|FRS5_ARATH	FRS5	Protein FAR1-RELATED SEQUENCE 5 OS=Arabidopsis thaliana GN=FRS5 PE=2 SV=1	44.6	6e-08
TRINITY_DN13218_c0_g1	sp|Q91V33|KHDR1_RAT	Khdrbs1	KH domain-containing, RNA-binding, signal transduction-associated protein 1 OS=Rattus norvegicus GN=Khdrbs1 PE=1 SV=1	73.2	5.2e-10
TRINITY_DN13247_c0_g1	sp|Q7TMK9|HNRPQ_MOUSE	Syncrip	Heterogeneous nuclear ribonucleoprotein Q OS=Mus musculus GN=Syncrip PE=1 SV=2	88.2	1.7e-28
TRINITY_DN13256_c0_g1	sp|Q56WD3|UN931_ARATH	At1g18000	UNC93-like protein 1 OS=Arabidopsis thaliana GN=At1g18000 PE=2 SV=2	43.2	1.7e-10
TRINITY_DN13279_c0_g1	sp|Q9SH88|RRS1_ARATH	At2g37990	Ribosome biogenesis regulatory protein homolog OS=Arabidopsis thaliana GN=At2g37990 PE=2 SV=2	55.3	2.4e-15
TRINITY_DN13297_c0_g1	sp|Q9FFF9|APC1_ARATH	APC1	Anaphase-promoting complex subunit 1 OS=Arabidopsis thaliana GN=APC1 PE=2 SV=1	41.3	4.2e-19
TRINITY_DN13342_c0_g1	sp|Q7ZVY5|CISY_DANRE	cs	Citrate synthase, mitochondrial OS=Danio rerio GN=cs PE=2 SV=1	90.2	1.8e-22
TRINITY_DN13344_c0_g1	sp|Q9CAP8|LACS9_ARATH	LACS9	Long chain acyl-CoA synthetase 9, chloroplastic OS=Arabidopsis thaliana GN=LACS9 PE=1 SV=1	35.9	5.1e-07
TRINITY_DN13348_c0_g1	sp|Q680P8|RS29_ARATH	RPS29A	40S ribosomal protein S29 OS=Arabidopsis thaliana GN=RPS29A PE=3 SV=2	82.1	1.2e-25
TRINITY_DN13361_c0_g3	sp|Q9M0M2|AB9B_ARATH	ABCB9	ABC transporter B family member 9 OS=Arabidopsis thaliana GN=ABCB9 PE=3 SV=2	68.3	5.9e-10
TRINITY_DN1336_c0_g1	sp|C0LGT6|EFR_ARATH	EFR	LRR receptor-like serine/threonine-protein kinase EFR OS=Arabidopsis thaliana GN=EFR PE=1 SV=1	43.1	6.4e-06
TRINITY_DN13372_c0_g1	sp|Q7XJ39|NLT2A_ORYSJ	LTP2-A	Non-specific lipid-transfer protein 2A OS=Oryza sativa subsp. japonica GN=LTP2-A PE=3 SV=2	61.2	1.2e-16
TRINITY_DN13380_c0_g1	sp|O80770|SPT52_ARATH	At2g34210	Putative transcription elongation factor SPT5 homolog 2 OS=Arabidopsis thaliana GN=At2g34210 PE=3 SV=2	82.9	6.6e-25
TRINITY_DN13391_c0_g1	sp|Q9ZNS4|PRB1_ARATH	PRB1	Pathogenesis-related protein 1 OS=Arabidopsis thaliana GN=PRB1 PE=2 SV=1	61.6	1.2e-50
TRINITY_DN13396_c0_g1	sp|Q84JL2|ODBA2_ARATH	At5g09300	2-oxoisovalerate dehydrogenase subunit alpha 2, mitochondrial OS=Arabidopsis thaliana GN=At5g09300 PE=1 SV=1	82.9	1.3e-28
TRINITY_DN13402_c0_g1	sp|Q9ZQA3|PME15_ARATH	PME15	Probable pectinesterase 15 OS=Arabidopsis thaliana GN=PME15 PE=2 SV=1	80	5.4e-27
TRINITY_DN1340_c0_g1	sp|Q9SDS7|VATC_ARATH	VHA-C	V-type proton ATPase subunit C OS=Arabidopsis thaliana GN=VHA-C PE=1 SV=1	76.8	1e-25
TRINITY_DN13411_c0_g2	sp|Q9C6I8|NOG1_ARATH	At1g50920	Nucleolar GTP-binding protein 1 OS=Arabidopsis thaliana GN=At1g50920 PE=2 SV=1	81	1.1e-21
TRINITY_DN13411_c0_g3	sp|Q9C6I8|NOG1_ARATH	At1g50920	Nucleolar GTP-binding protein 1 OS=Arabidopsis thaliana GN=At1g50920 PE=2 SV=1	47.8	2.8e-07
TRINITY_DN13412_c0_g2	sp|Q9SZA4|CDC21_ARATH	CDC20-1	Cell division cycle 20.1, cofactor of APC complex OS=Arabidopsis thaliana GN=CDC20-1 PE=1 SV=1	78.1	1.4e-28
TRINITY_DN13417_c0_g1	sp|P36578|RL4_HUMAN	RPL4	60S ribosomal protein L4 OS=Homo sapiens GN=RPL4 PE=1 SV=5	100	3.4e-110
TRINITY_DN13440_c0_g1	sp|Q9LVV3|PHL22_ARATH	PHYL2.2	Phytolongin Phyl2.2 OS=Arabidopsis thaliana GN=PHYL2.2 PE=2 SV=1	53.6	2.3e-13
TRINITY_DN13441_c0_g1	sp|Q9FJU9|E1313_ARATH	At5g56590	Glucan endo-1,3-beta-glucosidase 13 OS=Arabidopsis thaliana GN=At5g56590 PE=1 SV=1	71.4	2.4e-29
TRINITY_DN13469_c0_g1	sp|Q08DN7|VAV_BOVIN	VAV1	Proto-oncogene vav OS=Bos taurus GN=VAV1 PE=2 SV=1	58.2	2.9e-17
TRINITY_DN13479_c0_g2	sp|Q0JKZ0|SNL6_ORYSJ	SNL6	Cinnamoyl-CoA reductase-like SNL6 OS=Oryza sativa subsp. japonica GN=SNL6 PE=3 SV=1	50	6.8e-15
TRINITY_DN13481_c0_g1	sp|Q6ESZ9|SDC1_ORYSJ	SDC1	Serine decarboxylase 1 OS=Oryza sativa subsp. japonica GN=SDC1 PE=3 SV=1	93.2	6.1e-37
TRINITY_DN13482_c0_g1	sp|Q94AH9|MD36A_ARATH	MED36A	Mediator of RNA polymerase II transcription subunit 36a OS=Arabidopsis thaliana GN=MED36A PE=1 SV=2	86.2	1.3e-26
TRINITY_DN13501_c0_g1	sp|P97384|ANX11_MOUSE	Anxa11	Annexin A11 OS=Mus musculus GN=Anxa11 PE=1 SV=2	49.4	1.2e-14
TRINITY_DN13502_c0_g1	sp|Q9S714|PSAE2_ARATH	PSAE2	Photosystem I reaction center subunit IV B, chloroplastic OS=Arabidopsis thaliana GN=PSAE2 PE=2 SV=1	87.5	2.7e-09
TRINITY_DN13505_c0_g1	sp|F4JWS8|QCR72_ARATH	QCR7-2	Cytochrome b-c1 complex subunit 7-2 OS=Arabidopsis thaliana GN=QCR7-2 PE=1 SV=1	84	4e-31
TRINITY_DN13563_c0_g1	sp|P51567|AFC2_ARATH	AFC2	Serine/threonine-protein kinase AFC2 OS=Arabidopsis thaliana GN=AFC2 PE=1 SV=1	92.2	8.5e-31
TRINITY_DN13583_c0_g1	sp|Q0WM29|MMSA_ARATH	ALDH6B2	Methylmalonate-semialdehyde dehydrogenase [acylating], mitochondrial OS=Arabidopsis thaliana GN=ALDH6B2 PE=2 SV=2	81.4	4.5e-21
TRINITY_DN13586_c0_g1	sp|Q5RGV1|IMDH3_DANRE	impdh1b	Inosine-5'-monophosphate dehydrogenase 1b OS=Danio rerio GN=impdh1b PE=2 SV=1	100	1.3e-34
TRINITY_DN13594_c0_g1	sp|P47082|AVT1_YEAST	AVT1	Vacuolar amino acid transporter 1 OS=Saccharomyces cerevisiae (strain ATCC 204508 / S288c) GN=AVT1 PE=1 SV=1	23.7	7.1e-21
TRINITY_DN13595_c0_g1	sp|O48844|PSD1A_ARATH	RPN2A	26S proteasome non-ATPase regulatory subunit 1 homolog A OS=Arabidopsis thaliana GN=RPN2A PE=1 SV=1	84.3	1.3e-25
TRINITY_DN13597_c1_g1	sp|P08962|CD63_HUMAN	CD63	CD63 antigen OS=Homo sapiens GN=CD63 PE=1 SV=2	100	1.5e-60
TRINITY_DN13612_c0_g1	sp|Q05519|SRS11_HUMAN	SRSF11	Serine/arginine-rich splicing factor 11 OS=Homo sapiens GN=SRSF11 PE=1 SV=1	84.4	9.8e-33
TRINITY_DN13618_c0_g1	sp|Q99471|PFD5_HUMAN	PFDN5	Prefoldin subunit 5 OS=Homo sapiens GN=PFDN5 PE=1 SV=2	100	1.5e-24
TRINITY_DN13635_c0_g1	sp|P31580|HCE1_ORYLA	hcea	High choriolytic enzyme 1 OS=Oryzias latipes GN=hcea PE=1 SV=1	38.5	4.5e-15
TRINITY_DN13652_c0_g1	sp|Q00839|HNRPU_HUMAN	HNRNPU	Heterogeneous nuclear ribonucleoprotein U OS=Homo sapiens GN=HNRNPU PE=1 SV=6	64	3.3e-26
TRINITY_DN1367_c0_g1	sp|Q76I81|RS12_BOVIN	RPS12	40S ribosomal protein S12 OS=Bos taurus GN=RPS12 PE=2 SV=1	100	4.4e-71
TRINITY_DN13683_c0_g1	sp|Q9FZE0|BGL40_ARATH	BGLU40	Beta-glucosidase 40 OS=Arabidopsis thaliana GN=BGLU40 PE=2 SV=1	73.3	3.4e-30
TRINITY_DN1368_c0_g1	sp|Q84WU2|UBP13_ARATH	UBP13	Ubiquitin carboxyl-terminal hydrolase 13 OS=Arabidopsis thaliana GN=UBP13 PE=2 SV=1	84.2	4.1e-23
TRINITY_DN13702_c0_g1	sp|P32295|ARG7_VIGRR	ARG7	Indole-3-acetic acid-induced protein ARG7 OS=Vigna radiata var. radiata GN=ARG7 PE=2 SV=1	57.1	4.4e-20
TRINITY_DN1372_c0_g1	sp|A7QEU4|PER5_VITVI	GSVIVT00037159001	Peroxidase 5 OS=Vitis vinifera GN=GSVIVT00037159001 PE=1 SV=2	59.2	2.8e-15
TRINITY_DN13734_c0_g2	sp|Q9LHE5|TO401_ARATH	TOM40-1	Mitochondrial import receptor subunit TOM40-1 OS=Arabidopsis thaliana GN=TOM40-1 PE=1 SV=3	68.1	2.4e-22
TRINITY_DN13744_c0_g1	sp|Q58E77|WD82B_XENLA	wdr82-b	WD repeat-containing protein 82-B OS=Xenopus laevis GN=wdr82-b PE=2 SV=1	40.7	2.3e-69
TRINITY_DN13752_c0_g1	sp|Q5UAP0|RS4_BOMMO	RpS4	40S ribosomal protein S4 OS=Bombyx mori GN=RpS4 PE=2 SV=1	67.9	7.7e-28
TRINITY_DN13755_c0_g1	sp|A1A4Q2|PRXD1_BOVIN	PRORSD1	Prolyl-tRNA synthetase associated domain-containing protein 1 OS=Bos taurus GN=PRORSD1 PE=2 SV=1	37.3	4e-22
TRINITY_DN13756_c0_g1	sp|Q52I78|NAMPT_PIG	NAMPT	Nicotinamide phosphoribosyltransferase OS=Sus scrofa GN=NAMPT PE=2 SV=2	93.1	1.3e-36
TRINITY_DN13771_c0_g1	sp|Q9LXT9|CALS3_ARATH	CALS3	Callose synthase 3 OS=Arabidopsis thaliana GN=CALS3 PE=2 SV=3	90.9	8e-28
TRINITY_DN13824_c0_g1	sp|Q9LU14|APG2_ARATH	APG	GDSL esterase/lipase APG OS=Arabidopsis thaliana GN=APG PE=2 SV=1	57.6	3e-14
TRINITY_DN13824_c0_g2	sp|Q9LU14|APG2_ARATH	APG	GDSL esterase/lipase APG OS=Arabidopsis thaliana GN=APG PE=2 SV=1	80.6	1.1e-29
TRINITY_DN13826_c0_g1	sp|B9G2A8|BIG_ORYSJ	Os09g0247700	Auxin transport protein BIG OS=Oryza sativa subsp. japonica GN=Os09g0247700 PE=2 SV=1	100	2.2e-34
TRINITY_DN13826_c0_g2	sp|B9G2A8|BIG_ORYSJ	Os09g0247700	Auxin transport protein BIG OS=Oryza sativa subsp. japonica GN=Os09g0247700 PE=2 SV=1	98.6	1e-17
TRINITY_DN13829_c0_g1	sp|Q3ZC10|SMD1_BOVIN	SNRPD1	Small nuclear ribonucleoprotein Sm D1 OS=Bos taurus GN=SNRPD1 PE=3 SV=1	77.4	3.9e-20
TRINITY_DN13837_c0_g1	sp|Q9C8K2|AB12G_ARATH	ABCG12	ABC transporter G family member 12 OS=Arabidopsis thaliana GN=ABCG12 PE=1 SV=1	71.9	2.2e-17
TRINITY_DN13847_c0_g2	sp|P23727|P85A_BOVIN	PIK3R1	Phosphatidylinositol 3-kinase regulatory subunit alpha OS=Bos taurus GN=PIK3R1 PE=1 SV=1	70.6	1e-32
TRINITY_DN13847_c0_g5	sp|P23727|P85A_BOVIN	PIK3R1	Phosphatidylinositol 3-kinase regulatory subunit alpha OS=Bos taurus GN=PIK3R1 PE=1 SV=1	93.6	2.7e-46
TRINITY_DN13849_c0_g1	sp|Q29PZ1|GRC10_ARATH	GRXC10	Glutaredoxin-C10 OS=Arabidopsis thaliana GN=GRXC10 PE=2 SV=1	65.3	5.6e-28
TRINITY_DN13864_c0_g1	sp|P00156|CYB_HUMAN	MT-CYB	Cytochrome b OS=Homo sapiens GN=MT-CYB PE=1 SV=2	93.7	1.5e-127
TRINITY_DN13864_c0_g2	sp|P00156|CYB_HUMAN	MT-CYB	Cytochrome b OS=Homo sapiens GN=MT-CYB PE=1 SV=2	95.3	1.7e-51
TRINITY_DN13864_c0_g4	sp|Q9MIX8|CYB_DANRE	mt-cyb	Cytochrome b OS=Danio rerio GN=mt-cyb PE=3 SV=1	93.9	1.5e-181
TRINITY_DN13888_c0_g1	sp|Q9FJW4|NDUS4_ARATH	FRO1	NADH dehydrogenase [ubiquinone] iron-sulfur protein 4, mitochondrial OS=Arabidopsis thaliana GN=FRO1 PE=2 SV=1	62.1	1.4e-50
TRINITY_DN13893_c0_g1	sp|Q1JPZ7|PRP39_DANRE	prpf39	Pre-mRNA-processing factor 39 OS=Danio rerio GN=prpf39 PE=2 SV=2	92.6	4.9e-33
TRINITY_DN13906_c1_g1	sp|Q9AST6|VSP55_ARATH	At1g32410	Vacuolar protein sorting-associated protein 55 homolog OS=Arabidopsis thaliana GN=At1g32410 PE=2 SV=1	66.2	1.1e-44
TRINITY_DN13921_c0_g1	sp|Q10RB4|BGAL5_ORYSJ	Os03g0165400	Beta-galactosidase 5 OS=Oryza sativa subsp. japonica GN=Os03g0165400 PE=2 SV=1	100	6.9e-35
TRINITY_DN13934_c0_g1	sp|P08520|LEG_ELEEL	-	Beta-galactoside-binding lectin OS=Electrophorus electricus PE=1 SV=1	47.9	5.1e-18
TRINITY_DN13936_c1_g2	sp|A5H454|PER66_MAIZE	PER66	Peroxidase 66 OS=Zea mays GN=PER66 PE=1 SV=1	48.4	3.3e-06
TRINITY_DN13941_c0_g1	sp|A7Z019|SMCA4_BOVIN	SMARCA4	Transcription activator BRG1 OS=Bos taurus GN=SMARCA4 PE=2 SV=1	88.1	2.7e-15
TRINITY_DN13946_c0_g1	sp|Q9LIE6|VQ22_ARATH	VQ22	VQ motif-containing protein 22 OS=Arabidopsis thaliana GN=VQ22 PE=2 SV=1	45.5	3.1e-08
TRINITY_DN13952_c0_g1	sp|P31110|TLP_ORYSJ	Os12g0628600	Thaumatin-like protein OS=Oryza sativa subsp. japonica GN=Os12g0628600 PE=1 SV=1	85.3	4.3e-30
TRINITY_DN13957_c0_g1	sp|Q9Z324|DPM2_MOUSE	Dpm2	Dolichol phosphate-mannose biosynthesis regulatory protein OS=Mus musculus GN=Dpm2 PE=3 SV=3	61.5	1.8e-17
TRINITY_DN13971_c0_g1	sp|Q9FYH7|VSR6_ARATH	VSR6	Vacuolar-sorting receptor 6 OS=Arabidopsis thaliana GN=VSR6 PE=2 SV=3	77.2	4.2e-31
TRINITY_DN13978_c0_g1	sp|Q9FLU1|BIN4_ARATH	BIN4	DNA-binding protein BIN4 OS=Arabidopsis thaliana GN=BIN4 PE=1 SV=2	66.3	2.1e-26
TRINITY_DN13982_c0_g1	sp|P14866|HNRPL_HUMAN	HNRNPL	Heterogeneous nuclear ribonucleoprotein L OS=Homo sapiens GN=HNRNPL PE=1 SV=2	100	1e-31
TRINITY_DN13982_c1_g1	sp|P14866|HNRPL_HUMAN	HNRNPL	Heterogeneous nuclear ribonucleoprotein L OS=Homo sapiens GN=HNRNPL PE=1 SV=2	69.4	8.9e-30
TRINITY_DN13984_c0_g1	sp|Q03663|GSTX2_TOBAC	-	Probable glutathione S-transferase OS=Nicotiana tabacum PE=2 SV=1	56.8	4.3e-42
TRINITY_DN13985_c0_g2	sp|Q9AR86|ISPS_POPCN	ISPS	Isoprene synthase, chloroplastic OS=Populus canescens GN=ISPS PE=1 SV=1	49.2	4.2e-08
TRINITY_DN13996_c0_g2	sp|Q9SGP6|GRXC9_ARATH	GRXC9	Glutaredoxin-C9 OS=Arabidopsis thaliana GN=GRXC9 PE=1 SV=1	58.2	2.5e-13
TRINITY_DN14023_c0_g1	sp|Q09178|JAK1_CYPCA	jak1	Tyrosine-protein kinase JAK1 OS=Cyprinus carpio GN=jak1 PE=2 SV=1	98.6	1.3e-36
TRINITY_DN14032_c0_g1	sp|Q1G3M2|LYRM9_ARATH	At3g19508	LYR motif-containing protein At3g19508 OS=Arabidopsis thaliana GN=At3g19508 PE=3 SV=1	66.2	7.4e-24
TRINITY_DN14058_c0_g2	sp|O22769|NDUV2_ARATH	At4g02580	NADH dehydrogenase [ubiquinone] flavoprotein 2, mitochondrial OS=Arabidopsis thaliana GN=At4g02580 PE=1 SV=3	93.5	2.8e-47
TRINITY_DN14063_c0_g1	sp|P49207|RL34_HUMAN	RPL34	60S ribosomal protein L34 OS=Homo sapiens GN=RPL34 PE=1 SV=3	100	2.8e-46
TRINITY_DN14063_c0_g2	sp|Q7ZWJ7|RL34_DANRE	rpl34	60S ribosomal protein L34 OS=Danio rerio GN=rpl34 PE=3 SV=3	100	5.1e-47
TRINITY_DN14063_c0_g3	sp|Q7ZWJ7|RL34_DANRE	rpl34	60S ribosomal protein L34 OS=Danio rerio GN=rpl34 PE=3 SV=3	99.1	2.7e-55
TRINITY_DN14070_c0_g1	sp|Q9LIN3|RZ1A_ARATH	RZ1A	Glycine-rich RNA-binding protein RZ1A OS=Arabidopsis thaliana GN=RZ1A PE=1 SV=1	80	7.1e-30
TRINITY_DN14076_c0_g1	sp|Q08DB5|STX5_BOVIN	STX5	Syntaxin-5 OS=Bos taurus GN=STX5 PE=2 SV=1	59.2	1.2e-13
TRINITY_DN14113_c0_g4	sp|Q0WN60|PPR48_ARATH	PCMP-H8	Pentatricopeptide repeat-containing protein At1g18485 OS=Arabidopsis thaliana GN=PCMP-H8 PE=2 SV=2	49.2	5.6e-13
TRINITY_DN14120_c0_g2	sp|P79888|DCAM_XENLA	amd1	S-adenosylmethionine decarboxylase proenzyme OS=Xenopus laevis GN=amd1 PE=2 SV=1	96.4	2.1e-41
TRINITY_DN14120_c0_g4	sp|P79888|DCAM_XENLA	amd1	S-adenosylmethionine decarboxylase proenzyme OS=Xenopus laevis GN=amd1 PE=2 SV=1	68.8	6.2e-07
TRINITY_DN14143_c0_g1	sp|Q9Z0J0|NPC2_MOUSE	Npc2	Epididymal secretory protein E1 OS=Mus musculus GN=Npc2 PE=1 SV=1	100	5.7e-32
TRINITY_DN1414_c0_g1	sp|O04226|P5CS_ORYSJ	P5CS	Delta-1-pyrroline-5-carboxylate synthase OS=Oryza sativa subsp. japonica GN=P5CS PE=2 SV=2	98.7	2.8e-37
TRINITY_DN14152_c0_g1	sp|Q0VBL6|HIF3A_MOUSE	Hif3a	Hypoxia-inducible factor 3-alpha OS=Mus musculus GN=Hif3a PE=1 SV=2	58.5	3.5e-22
TRINITY_DN14156_c0_g1	sp|Q7Z401|MYCPP_HUMAN	DENND4A	C-myc promoter-binding protein OS=Homo sapiens GN=DENND4A PE=1 SV=2	76.6	1.5e-26
TRINITY_DN14158_c0_g1	sp|A7NY33|PER4_VITVI	GSVIVT00023967001	Peroxidase 4 OS=Vitis vinifera GN=GSVIVT00023967001 PE=1 SV=1	75.7	4.6e-26
TRINITY_DN14169_c0_g1	sp|Q39613|CYPH_CATRO	PCKR1	Peptidyl-prolyl cis-trans isomerase OS=Catharanthus roseus GN=PCKR1 PE=1 SV=1	57.2	2.5e-48
TRINITY_DN14181_c0_g1	sp|Q9T070|COX6A_ARATH	COX6A	Cytochrome c oxidase subunit 6a, mitochondrial OS=Arabidopsis thaliana GN=COX6A PE=2 SV=1	68.3	2.6e-36
TRINITY_DN14183_c0_g1	sp|C7J4U3|OST4A_ORYSJ	OST4A	Dolichyl-diphosphooligosaccharide--protein glycosyltransferase subunit 4A OS=Oryza sativa subsp. japonica GN=OST4A PE=3 SV=1	97.3	3e-14
TRINITY_DN14199_c0_g1	sp|Q3E9B4|OFP8_ARATH	OFP8	Transcription repressor OFP8 OS=Arabidopsis thaliana GN=OFP8 PE=2 SV=1	72.5	5.1e-14
TRINITY_DN141_c0_g1	sp|Q9SR44|LHTL2_ARATH	At1g67640	Lysine histidine transporter-like 2 OS=Arabidopsis thaliana GN=At1g67640 PE=2 SV=1	86.6	6.2e-28
TRINITY_DN14208_c0_g1	sp|O42630|CARP_ASPFU	pep2	Vacuolar protease A OS=Neosartorya fumigata (strain ATCC MYA-4609 / Af293 / CBS 101355 / FGSC A1100) GN=pep2 PE=2 SV=1	52.6	7.6e-20
TRINITY_DN14211_c0_g1	sp|P55906|BGH3_BOVIN	TGFBI	Transforming growth factor-beta-induced protein ig-h3 OS=Bos taurus GN=TGFBI PE=1 SV=2	68.8	1.1e-23
TRINITY_DN14218_c0_g1	sp|P81660|TNNC2_ANGAN	-	Troponin C, skeletal muscle OS=Anguilla anguilla PE=1 SV=1	88.7	5.4e-40
TRINITY_DN14230_c0_g1	sp|F4HQD4|HSP7P_ARATH	HSP70-15	Heat shock 70 kDa protein 15 OS=Arabidopsis thaliana GN=HSP70-15 PE=1 SV=1	68.2	4e-19
TRINITY_DN14233_c1_g2	sp|A5PK27|R144B_BOVIN	RNF144B	E3 ubiquitin-protein ligase RNF144B OS=Bos taurus GN=RNF144B PE=2 SV=1	91.9	5.8e-10
TRINITY_DN14246_c0_g1	sp|Q84VG0|CML7_ORYSJ	CML7	Probable calcium-binding protein CML7 OS=Oryza sativa subsp. japonica GN=CML7 PE=2 SV=1	85.7	1.7e-28
TRINITY_DN14252_c0_g1	sp|P28759|SODF_SOYBN	SODB	Superoxide dismutase [Fe], chloroplastic OS=Glycine max GN=SODB PE=2 SV=1	100	3.4e-47
TRINITY_DN1427_c0_g1	sp|O00483|NDUA4_HUMAN	NDUFA4	Cytochrome c oxidase subunit NDUFA4 OS=Homo sapiens GN=NDUFA4 PE=1 SV=1	100	3.1e-29
TRINITY_DN14286_c0_g1	sp|Q9JMH6|TRXR1_MOUSE	Txnrd1	Thioredoxin reductase 1, cytoplasmic OS=Mus musculus GN=Txnrd1 PE=1 SV=3	76.7	1.5e-27
TRINITY_DN14295_c0_g1	sp|Q6K8J4|ISPG_ORYSJ	ISPG	4-hydroxy-3-methylbut-2-en-1-yl diphosphate synthase (ferredoxin), chloroplastic OS=Oryza sativa subsp. japonica GN=ISPG PE=2 SV=1	100	4.5e-34
TRINITY_DN14312_c0_g1	sp|Q8GYN5|RIN4_ARATH	RIN4	RPM1-interacting protein 4 OS=Arabidopsis thaliana GN=RIN4 PE=1 SV=1	31.1	3.5e-15
TRINITY_DN14325_c0_g1	sp|Q9M7X7|RL291_ARATH	RPL29A	60S ribosomal protein L29-1 OS=Arabidopsis thaliana GN=RPL29A PE=1 SV=1	81.7	8.2e-20
TRINITY_DN14335_c0_g1	sp|Q5F4B1|PGP_CHICK	PGP	Glycerol-3-phosphate phosphatase OS=Gallus gallus GN=PGP PE=2 SV=1	71.2	2.7e-21
TRINITY_DN14335_c0_g3	sp|Q2T9S4|PGP_BOVIN	PGP	Glycerol-3-phosphate phosphatase OS=Bos taurus GN=PGP PE=2 SV=1	51.2	1.2e-14
TRINITY_DN1433_c0_g2	sp|P46776|RL27A_HUMAN	RPL27A	60S ribosomal protein L27a OS=Homo sapiens GN=RPL27A PE=1 SV=2	100	5.6e-61
TRINITY_DN14342_c0_g1	sp|Q90WT7|BLCAP_CARAU	blcap	Bladder cancer-associated protein OS=Carassius auratus GN=blcap PE=3 SV=1	100	1.8e-36
TRINITY_DN14344_c0_g1	sp|Q2UHA7|NCPR_ASPOR	cprA	NADPH--cytochrome P450 reductase OS=Aspergillus oryzae (strain ATCC 42149 / RIB 40) GN=cprA PE=3 SV=1	64.2	5.4e-26
TRINITY_DN14361_c0_g1	sp|O94489|EF3_SCHPO	tef3	Elongation factor 3 OS=Schizosaccharomyces pombe (strain 972 / ATCC 24843) GN=tef3 PE=1 SV=1	71.6	9.9e-24
TRINITY_DN14388_c0_g1	sp|P49030|MGN_ORYSJ	Os12g0287200	Protein mago nashi homolog OS=Oryza sativa subsp. japonica GN=Os12g0287200 PE=2 SV=2	95.9	4e-22
TRINITY_DN14396_c0_g1	sp|Q9LXT3|MBF1B_ARATH	MBF1B	Multiprotein-bridging factor 1b OS=Arabidopsis thaliana GN=MBF1B PE=2 SV=1	73.1	5.6e-16
TRINITY_DN14402_c0_g1	sp|P00125|CY1_BOVIN	CYC1	Cytochrome c1, heme protein, mitochondrial OS=Bos taurus GN=CYC1 PE=1 SV=2	93.3	5.6e-38
TRINITY_DN14409_c0_g1	sp|Q9XGI7|NAS_SOLLC	CHLN	Nicotianamine synthase OS=Solanum lycopersicum GN=CHLN PE=2 SV=1	75	5.3e-25
TRINITY_DN14409_c0_g2	sp|Q9XGI7|NAS_SOLLC	CHLN	Nicotianamine synthase OS=Solanum lycopersicum GN=CHLN PE=2 SV=1	62.9	1.2e-26
TRINITY_DN14426_c0_g1	sp|Q8H191|PAO4_ARATH	PAO4	Probable polyamine oxidase 4 OS=Arabidopsis thaliana GN=PAO4 PE=1 SV=1	63.8	1.4e-19
TRINITY_DN14429_c0_g1	sp|F4JVN6|TPPII_ARATH	TPP2	Tripeptidyl-peptidase 2 OS=Arabidopsis thaliana GN=TPP2 PE=1 SV=1	64.9	1.9e-17
TRINITY_DN14431_c0_g1	sp|Q9LUV4|FRL4A_ARATH	FRL4A	FRIGIDA-like protein 4a OS=Arabidopsis thaliana GN=FRL4A PE=2 SV=1	55.6	4.2e-14
TRINITY_DN14435_c0_g1	sp|Q9UQ80|PA2G4_HUMAN	PA2G4	Proliferation-associated protein 2G4 OS=Homo sapiens GN=PA2G4 PE=1 SV=3	93.7	2.9e-37
TRINITY_DN14440_c0_g2	sp|Q9FNH6|NHL3_ARATH	NHL3	NDR1/HIN1-Like protein 3 OS=Arabidopsis thaliana GN=NHL3 PE=1 SV=1	51.8	1.5e-08
TRINITY_DN14441_c1_g2	sp|Q9LUC6|C7A14_ARATH	CYP72A14	Cytochrome P450 72A14 OS=Arabidopsis thaliana GN=CYP72A14 PE=2 SV=1	50	1.9e-10
TRINITY_DN14450_c0_g1	sp|Q9SA86|BBE9_ARATH	At1g30710	Berberine bridge enzyme-like 9 OS=Arabidopsis thaliana GN=At1g30710 PE=2 SV=1	61.2	1.5e-10
TRINITY_DN14485_c0_g2	sp|A7E3W5|SNG2_BOVIN	SYNGR2	Synaptogyrin-2 OS=Bos taurus GN=SYNGR2 PE=2 SV=1	49.5	2e-19
TRINITY_DN14493_c0_g1	sp|P46934|NEDD4_HUMAN	NEDD4	E3 ubiquitin-protein ligase NEDD4 OS=Homo sapiens GN=NEDD4 PE=1 SV=4	89.7	5.3e-40
TRINITY_DN14497_c0_g1	sp|Q39839|NDK1_SOYBN	-	Nucleoside diphosphate kinase 1 OS=Glycine max PE=2 SV=1	97.3	7.1e-81
TRINITY_DN14501_c0_g1	sp|Q5VRH9|PUB12_ORYSJ	PUB12	U-box domain-containing protein 12 OS=Oryza sativa subsp. japonica GN=PUB12 PE=2 SV=1	57.1	2.2e-14
TRINITY_DN14504_c0_g1	sp|Q9LT75|PTN2A_ARATH	PTEN2A	Phosphatidylinositol 3,4,5-trisphosphate 3-phosphatase and protein-tyrosine-phosphatase PTEN2A OS=Arabidopsis thaliana GN=PTEN2A PE=1 SV=1	54.9	1.1e-11
TRINITY_DN14520_c0_g1	sp|Q9LIR8|FBK67_ARATH	At3g23880	F-box/kelch-repeat protein At3g23880 OS=Arabidopsis thaliana GN=At3g23880 PE=2 SV=1	62.9	7.4e-07
TRINITY_DN14534_c0_g2	sp|O49545|BAME1_ARATH	BAM1	Leucine-rich repeat receptor-like serine/threonine-protein kinase BAM1 OS=Arabidopsis thaliana GN=BAM1 PE=1 SV=1	62	8e-18
TRINITY_DN1454_c0_g1	sp|Q0D840|TRXH1_ORYSJ	TRXH	Thioredoxin H1 OS=Oryza sativa subsp. japonica GN=TRXH PE=1 SV=1	100	4.4e-64
TRINITY_DN14571_c0_g1	sp|P12107|COBA1_HUMAN	COL11A1	Collagen alpha-1(XI) chain OS=Homo sapiens GN=COL11A1 PE=1 SV=4	67.1	4.6e-25
TRINITY_DN14573_c0_g1	sp|E6Y8S8|NLTP1_APIGR	-	Non-specific lipid-transfer protein OS=Apium graveolens PE=1 SV=1	69.5	5.1e-40
TRINITY_DN14591_c0_g1	sp|Q9LSK9|Y5566_ARATH	At5g65660	Uncharacterized protein At5g65660 OS=Arabidopsis thaliana GN=At5g65660 PE=2 SV=1	47.4	5.7e-23
TRINITY_DN14619_c0_g1	sp|O89085|PDE4A_CAVPO	PDE4A	cAMP-specific 3',5'-cyclic phosphodiesterase 4A (Fragment) OS=Cavia porcellus GN=PDE4A PE=2 SV=1	86	2.7e-17
TRINITY_DN14624_c0_g1	sp|Q2TBP7|MYCBP_BOVIN	MYCBP	C-Myc-binding protein OS=Bos taurus GN=MYCBP PE=3 SV=3	44.9	4.5e-12
TRINITY_DN14626_c1_g1	sp|P24076|BGIA_MOMCH	-	Glu S.griseus protease inhibitor OS=Momordica charantia PE=1 SV=1	66.2	5.9e-18
TRINITY_DN14639_c0_g1	sp|Q6AXL3|NRROS_DANRE	nrros	Negative regulator of reactive oxygen species OS=Danio rerio GN=nrros PE=2 SV=1	74.7	1.1e-29
TRINITY_DN14641_c0_g1	sp|Q8K0D2|HABP2_MOUSE	Habp2	Hyaluronan-binding protein 2 OS=Mus musculus GN=Habp2 PE=1 SV=2	50.5	3.1e-20
TRINITY_DN14641_c0_g2	sp|Q8K0D2|HABP2_MOUSE	Habp2	Hyaluronan-binding protein 2 OS=Mus musculus GN=Habp2 PE=1 SV=2	58.8	1.5e-18
TRINITY_DN1464_c0_g1	sp|P57741|PFD3_ARATH	At5g49510	Probable prefoldin subunit 3 OS=Arabidopsis thaliana GN=At5g49510 PE=1 SV=1	88.1	3.3e-22
TRINITY_DN14670_c0_g1	sp|P24987|COX2_CYPCA	mt-co2	Cytochrome c oxidase subunit 2 OS=Cyprinus carpio GN=mt-co2 PE=3 SV=1	92.9	2.3e-111
TRINITY_DN14670_c0_g2	sp|Q9MIY7|COX2_DANRE	mt-co2	Cytochrome c oxidase subunit 2 OS=Danio rerio GN=mt-co2 PE=3 SV=1	95.2	2.1e-106
TRINITY_DN14670_c0_g3	sp|Q37741|COX2_GADMO	mt-co2	Cytochrome c oxidase subunit 2 OS=Gadus morhua GN=mt-co2 PE=3 SV=1	87.1	1.2e-107
TRINITY_DN14670_c0_g4	sp|Q38S35|COX2_APOMY	MT-CO2	Cytochrome c oxidase subunit 2 OS=Apodemus mystacinus GN=MT-CO2 PE=3 SV=1	91.8	6.4e-94
TRINITY_DN14670_c0_g5	sp|P00406|COX2_RAT	Mtco2	Cytochrome c oxidase subunit 2 OS=Rattus norvegicus GN=Mtco2 PE=1 SV=3	91.6	9.4e-84
TRINITY_DN14680_c0_g1	sp|Q755R1|SUI1_ASHGO	SUI1A	Protein translation factor SUI1 OS=Ashbya gossypii (strain ATCC 10895 / CBS 109.51 / FGSC 9923 / NRRL Y-1056) GN=SUI1A PE=3 SV=1	61.1	3.8e-35
TRINITY_DN14681_c0_g3	sp|Q2R2D5|XA21_ORYSJ	XA21	Receptor kinase-like protein Xa21 OS=Oryza sativa subsp. japonica GN=XA21 PE=1 SV=1	41	4.1e-38
TRINITY_DN14682_c0_g1	sp|Q04861|NFKB1_CHICK	NFKB1	Nuclear factor NF-kappa-B p105 subunit OS=Gallus gallus GN=NFKB1 PE=2 SV=2	57.3	2.8e-19
TRINITY_DN14685_c0_g2	sp|P20825|POL2_DROME	pol	Retrovirus-related Pol polyprotein from transposon 297 OS=Drosophila melanogaster GN=pol PE=3 SV=1	56.5	1.8e-17
TRINITY_DN14688_c0_g1	sp|Q6DHR3|RG1BA_DANRE	rasgef1ba	Ras-GEF domain-containing family member 1B-A OS=Danio rerio GN=rasgef1ba PE=2 SV=2	94.1	1.6e-31
TRINITY_DN14694_c0_g1	sp|Q6PBD7|ID2_XENTR	id2	DNA-binding protein inhibitor ID-2 OS=Xenopus tropicalis GN=id2 PE=2 SV=1	85	2.2e-32
TRINITY_DN14708_c0_g1	sp|Q62261|SPTB2_MOUSE	Sptbn1	Spectrin beta chain, non-erythrocytic 1 OS=Mus musculus GN=Sptbn1 PE=1 SV=2	88.4	6e-36
TRINITY_DN14725_c0_g1	sp|Q9LZ00|MED4_ARATH	MED4	Mediator of RNA polymerase II transcription subunit 4 OS=Arabidopsis thaliana GN=MED4 PE=1 SV=1	60.6	5.4e-90
TRINITY_DN14726_c1_g1	sp|Q8W1D5|CIPKP_ARATH	CIPK25	CBL-interacting serine/threonine-protein kinase 25 OS=Arabidopsis thaliana GN=CIPK25 PE=2 SV=1	58.7	1.4e-08
TRINITY_DN14728_c0_g1	sp|P35700|PRDX1_MOUSE	Prdx1	Peroxiredoxin-1 OS=Mus musculus GN=Prdx1 PE=1 SV=1	100	5.3e-116
TRINITY_DN14732_c0_g1	sp|P67868|CSK2B_BOVIN	CSNK2B	Casein kinase II subunit beta OS=Bos taurus GN=CSNK2B PE=1 SV=1	100	1.8e-41
TRINITY_DN14735_c0_g1	sp|O49607|SBT16_ARATH	SBT1.6	Subtilisin-like protease SBT1.6 OS=Arabidopsis thaliana GN=SBT1.6 PE=2 SV=1	43.3	2.1e-155
TRINITY_DN14738_c0_g1	sp|Q9FDW8|CYB5A_ARATH	CB5-A	Cytochrome b5 isoform A OS=Arabidopsis thaliana GN=CB5-A PE=1 SV=1	67.9	7.4e-47
TRINITY_DN14767_c0_g1	sp|Q09178|JAK1_CYPCA	jak1	Tyrosine-protein kinase JAK1 OS=Cyprinus carpio GN=jak1 PE=2 SV=1	96.6	7e-43
TRINITY_DN14777_c0_g1	sp|Q6PBK3|RS28_DANRE	rps28	40S ribosomal protein S28 OS=Danio rerio GN=rps28 PE=3 SV=1	100	1.8e-31
TRINITY_DN14777_c0_g2	sp|Q6PBK3|RS28_DANRE	rps28	40S ribosomal protein S28 OS=Danio rerio GN=rps28 PE=3 SV=1	100	1.8e-31
TRINITY_DN14777_c0_g3	sp|Q6PBK3|RS28_DANRE	rps28	40S ribosomal protein S28 OS=Danio rerio GN=rps28 PE=3 SV=1	100	2.4e-30
TRINITY_DN14785_c0_g2	sp|P48643|TCPE_HUMAN	CCT5	T-complex protein 1 subunit epsilon OS=Homo sapiens GN=CCT5 PE=1 SV=1	88.1	2.3e-27
TRINITY_DN14785_c0_g3	sp|P48643|TCPE_HUMAN	CCT5	T-complex protein 1 subunit epsilon OS=Homo sapiens GN=CCT5 PE=1 SV=1	97.3	1.4e-33
TRINITY_DN14787_c0_g1	sp|P55010|IF5_HUMAN	EIF5	Eukaryotic translation initiation factor 5 OS=Homo sapiens GN=EIF5 PE=1 SV=2	71	2.6e-19
TRINITY_DN14787_c0_g2	sp|P55010|IF5_HUMAN	EIF5	Eukaryotic translation initiation factor 5 OS=Homo sapiens GN=EIF5 PE=1 SV=2	94.6	1.4e-39
TRINITY_DN14817_c0_g1	sp|Q9MAV7|RL31_PANGI	RPL31	60S ribosomal protein L31 OS=Panax ginseng GN=RPL31 PE=2 SV=1	91.3	3.5e-48
TRINITY_DN14826_c0_g1	sp|B0FYY4|ITB1_SHEEP	ITGB1	Integrin beta-1 OS=Ovis aries GN=ITGB1 PE=2 SV=1	84.1	9.1e-27
TRINITY_DN14850_c0_g2	sp|Q9SVD0|SMXL3_ARATH	SMXL3	Protein SMAX1-LIKE 3 OS=Arabidopsis thaliana GN=SMXL3 PE=2 SV=1	84.7	6.3e-26
TRINITY_DN14856_c0_g1	sp|Q24208|IF2G_DROME	eIF-2gamma	Eukaryotic translation initiation factor 2 subunit 3 OS=Drosophila melanogaster GN=eIF-2gamma PE=2 SV=1	78.8	1.6e-06
TRINITY_DN14881_c0_g1	sp|Q258K2|MYH9_CANLF	MYH9	Myosin-9 OS=Canis lupus familiaris GN=MYH9 PE=2 SV=1	90.1	1.1e-40
TRINITY_DN14886_c0_g2	sp|Q9WU65|GLPK2_MOUSE	Gk2	Glycerol kinase 2 OS=Mus musculus GN=Gk2 PE=1 SV=1	65.3	6.5e-31
TRINITY_DN14896_c0_g1	sp|Q5SMI4|RL393_ORYSJ	RPL39C	60S ribosomal protein L39-3 OS=Oryza sativa subsp. japonica GN=RPL39C PE=3 SV=1	100	8.2e-24
TRINITY_DN14899_c0_g2	sp|Q0WN60|PPR48_ARATH	PCMP-H8	Pentatricopeptide repeat-containing protein At1g18485 OS=Arabidopsis thaliana GN=PCMP-H8 PE=2 SV=2	55.3	9.3e-21
TRINITY_DN14901_c0_g1	sp|Q5Z9Z3|OCLOT_ORYSJ	Os06g0320000	Thioredoxin-like protein Clot OS=Oryza sativa subsp. japonica GN=Os06g0320000 PE=2 SV=1	100	9e-30
TRINITY_DN14915_c0_g1	sp|Q94C11|SUGP1_ARATH	At3g52120	SURP and G-patch domain-containing protein 1-like protein OS=Arabidopsis thaliana GN=At3g52120 PE=2 SV=1	78.3	8.2e-23
TRINITY_DN14925_c0_g1	sp|P78814|SRP2_SCHPO	srp2	Pre-mRNA-splicing factor srp2 OS=Schizosaccharomyces pombe (strain 972 / ATCC 24843) GN=srp2 PE=1 SV=2	50	1.2e-12
TRINITY_DN14931_c0_g1	sp|P10978|POLX_TOBAC	-	Retrovirus-related Pol polyprotein from transposon TNT 1-94 OS=Nicotiana tabacum PE=2 SV=1	63.6	2e-26
TRINITY_DN14931_c0_g3	sp|P10978|POLX_TOBAC	-	Retrovirus-related Pol polyprotein from transposon TNT 1-94 OS=Nicotiana tabacum PE=2 SV=1	60.2	7.5e-33
TRINITY_DN14934_c0_g1	sp|Q9LZ57|RL363_ARATH	RPL36C	60S ribosomal protein L36-3 OS=Arabidopsis thaliana GN=RPL36C PE=3 SV=1	81	1.9e-40
TRINITY_DN14941_c0_g1	sp|Q9ZVK1|XTH10_ARATH	XTH10	Probable xyloglucan endotransglucosylase/hydrolase protein 10 OS=Arabidopsis thaliana GN=XTH10 PE=2 SV=1	72.5	1.8e-127
TRINITY_DN14945_c0_g2	sp|Q9QZA2|PDC6I_RAT	Pdcd6ip	Programmed cell death 6-interacting protein OS=Rattus norvegicus GN=Pdcd6ip PE=1 SV=2	74.6	4.9e-23
TRINITY_DN14952_c0_g1	sp|Q680P8|RS29_ARATH	RPS29A	40S ribosomal protein S29 OS=Arabidopsis thaliana GN=RPS29A PE=3 SV=2	92.9	3.7e-27
TRINITY_DN14957_c0_g1	sp|O04308|MPPA2_ARATH	MPPA2	Probable mitochondrial-processing peptidase subunit alpha-2, chloroplastic/mitochondrial OS=Arabidopsis thaliana GN=MPPA2 PE=1 SV=1	75	8.3e-27
TRINITY_DN14963_c0_g1	sp|Q0V7U7|LA2_ARATH	LA2	La protein 2 OS=Arabidopsis thaliana GN=LA2 PE=1 SV=1	65.2	3.1e-19
TRINITY_DN14978_c0_g2	sp|Q29Q81|SMR6_ARATH	SMR6	Cyclin-dependent protein kinase inhibitor SMR6 OS=Arabidopsis thaliana GN=SMR6 PE=1 SV=1	55.3	1.1e-12
TRINITY_DN14986_c0_g1	sp|Q9NRZ7|PLCC_HUMAN	AGPAT3	1-acyl-sn-glycerol-3-phosphate acyltransferase gamma OS=Homo sapiens GN=AGPAT3 PE=1 SV=1	80.8	7.9e-35
TRINITY_DN14986_c0_g2	sp|Q5E9R2|PLCD_BOVIN	AGPAT4	1-acyl-sn-glycerol-3-phosphate acyltransferase delta OS=Bos taurus GN=AGPAT4 PE=2 SV=1	75.8	3.5e-23
TRINITY_DN14988_c0_g1	sp|Q90YS9|RL39_ICTPU	rpl39	60S ribosomal protein L39 OS=Ictalurus punctatus GN=rpl39 PE=3 SV=1	100	6.9e-23
TRINITY_DN14991_c0_g2	sp|Q62261|SPTB2_MOUSE	Sptbn1	Spectrin beta chain, non-erythrocytic 1 OS=Mus musculus GN=Sptbn1 PE=1 SV=2	90.4	4.8e-38
TRINITY_DN14999_c0_g1	sp|Q9LKA5|MORF8_ARATH	MORF8	Multiple organellar RNA editing factor 8, chloroplastic/mitochondrial OS=Arabidopsis thaliana GN=MORF8 PE=1 SV=1	87.2	9e-35
TRINITY_DN15010_c0_g1	sp|Q5ZME2|MDHC_CHICK	MDH1	Malate dehydrogenase, cytoplasmic OS=Gallus gallus GN=MDH1 PE=2 SV=1	91.6	1e-48
TRINITY_DN15038_c0_g1	sp|Q93WK5|APRR7_ARATH	APRR7	Two-component response regulator-like APRR7 OS=Arabidopsis thaliana GN=APRR7 PE=1 SV=1	80	7.9e-14
TRINITY_DN15040_c0_g1	sp|Q15034|HERC3_HUMAN	HERC3	Probable E3 ubiquitin-protein ligase HERC3 OS=Homo sapiens GN=HERC3 PE=1 SV=1	67.1	2e-25
TRINITY_DN15048_c0_g1	sp|Q84J88|HIP36_ARATH	HIPP36	Heavy metal-associated isoprenylated plant protein 36 OS=Arabidopsis thaliana GN=HIPP36 PE=2 SV=1	56	8.6e-19
TRINITY_DN1504_c0_g1	sp|A2XGQ1|NUG2_ORYSI	NUG2	Nuclear/nucleolar GTPase 2 OS=Oryza sativa subsp. indica GN=NUG2 PE=3 SV=1	100	3.5e-41
TRINITY_DN15063_c0_g1	sp|Q0JNK5|COPB2_ORYSJ	Os01g0281400	Coatomer subunit beta-2 OS=Oryza sativa subsp. japonica GN=Os01g0281400 PE=3 SV=1	100	2.9e-33
TRINITY_DN15063_c0_g2	sp|Q53PC7|COPB1_ORYSJ	Os11g0174000	Coatomer subunit beta-1 OS=Oryza sativa subsp. japonica GN=Os11g0174000 PE=2 SV=1	100	3.6e-38
TRINITY_DN15063_c0_g3	sp|Q53PC7|COPB1_ORYSJ	Os11g0174000	Coatomer subunit beta-1 OS=Oryza sativa subsp. japonica GN=Os11g0174000 PE=2 SV=1	97.2	1.2e-32
TRINITY_DN15064_c0_g1	sp|Q8LGG8|USPAL_ARATH	At3g01520	Universal stress protein A-like protein OS=Arabidopsis thaliana GN=At3g01520 PE=1 SV=2	70.8	4.3e-67
TRINITY_DN15079_c0_g1	sp|Q3ZCI9|TCPQ_BOVIN	CCT8	T-complex protein 1 subunit theta OS=Bos taurus GN=CCT8 PE=1 SV=3	81.7	1.1e-27
TRINITY_DN15083_c0_g1	sp|Q9SA73|OLA1_ARATH	YchF1	Obg-like ATPase 1 OS=Arabidopsis thaliana GN=YchF1 PE=1 SV=1	82.4	1.4e-35
TRINITY_DN15089_c0_g1	sp|Q5PNY6|PUB21_ARATH	PUB21	U-box domain-containing protein 21 OS=Arabidopsis thaliana GN=PUB21 PE=2 SV=1	45.4	1.9e-94
TRINITY_DN15091_c0_g1	sp|Q42342|CYB5E_ARATH	CYTB5-E	Cytochrome b5 isoform E OS=Arabidopsis thaliana GN=CYTB5-E PE=1 SV=2	76.1	7.7e-27
TRINITY_DN15099_c0_g1	sp|P38385|SC61G_ORYSJ	Os02g0178400	Protein transport protein Sec61 subunit gamma OS=Oryza sativa subsp. japonica GN=Os02g0178400 PE=3 SV=1	94.2	3.7e-30
TRINITY_DN15100_c0_g1	sp|Q9SU13|FLA2_ARATH	FLA2	Fasciclin-like arabinogalactan protein 2 OS=Arabidopsis thaliana GN=FLA2 PE=1 SV=1	61.2	8.6e-32
TRINITY_DN15105_c1_g1	sp|Q5ZLN5|TADBP_CHICK	TARDBP	TAR DNA-binding protein 43 OS=Gallus gallus GN=TARDBP PE=2 SV=1	83.8	8.7e-45
TRINITY_DN15106_c0_g1	sp|Q7SZT7|ELAV4_XENLA	elavl4	ELAV-like protein 4 OS=Xenopus laevis GN=elavl4 PE=2 SV=1	100	3.2e-08
TRINITY_DN15114_c0_g1	sp|P32295|ARG7_VIGRR	ARG7	Indole-3-acetic acid-induced protein ARG7 OS=Vigna radiata var. radiata GN=ARG7 PE=2 SV=1	57.6	2.2e-17
TRINITY_DN15140_c0_g1	sp|P07768|SUIS_RABIT	SI	Sucrase-isomaltase, intestinal OS=Oryctolagus cuniculus GN=SI PE=1 SV=3	57.8	2.9e-17
TRINITY_DN15143_c0_g1	sp|P13447|LAT52_SOLLC	LAT52	Anther-specific protein LAT52 OS=Solanum lycopersicum GN=LAT52 PE=2 SV=1	35.3	2.3e-13
TRINITY_DN15147_c0_g1	sp|O82255|GRC13_ARATH	GRXC13	Glutaredoxin-C13 OS=Arabidopsis thaliana GN=GRXC13 PE=3 SV=1	74.3	1.2e-37
TRINITY_DN15162_c0_g5	sp|P04146|COPIA_DROME	GIP	Copia protein OS=Drosophila melanogaster GN=GIP PE=1 SV=3	44.4	6e-25
TRINITY_DN15163_c0_g2	sp|Q9T0K5|LRX3_ARATH	LRX3	Leucine-rich repeat extensin-like protein 3 OS=Arabidopsis thaliana GN=LRX3 PE=1 SV=1	77.4	9e-08
TRINITY_DN15180_c0_g1	sp|Q8W0Z9|CCR4A_ARATH	CCR4-1	Carbon catabolite repressor protein 4 homolog 1 OS=Arabidopsis thaliana GN=CCR4-1 PE=2 SV=1	76.7	2e-31
TRINITY_DN15181_c0_g1	sp|Q6NLG7|RFA3B_ARATH	RPA3B	Replication protein A 14 kDa subunit B OS=Arabidopsis thaliana GN=RPA3B PE=1 SV=1	67.9	1.7e-37
TRINITY_DN15188_c0_g1	sp|A3A9H6|ACET1_ORYSJ	Os02g0642300	Probable ascorbate-specific transmembrane electron transporter 1 OS=Oryza sativa subsp. japonica GN=Os02g0642300 PE=3 SV=1	48.6	1.7e-56
TRINITY_DN15195_c0_g1	sp|Q9FLT0|TSN2_ARATH	TSN2	Ribonuclease TUDOR 2 OS=Arabidopsis thaliana GN=TSN2 PE=1 SV=1	72.9	3.7e-30
TRINITY_DN15208_c0_g1	sp|Q8LE47|PPR87_ARATH	PPR336	Pentatricopeptide repeat-containing protein At1g61870, mitochondrial OS=Arabidopsis thaliana GN=PPR336 PE=2 SV=2	54.9	9.1e-55
TRINITY_DN15213_c0_g2	sp|Q9LY05|EF106_ARATH	ERF106	Ethylene-responsive transcription factor ERF106 OS=Arabidopsis thaliana GN=ERF106 PE=2 SV=1	47.4	1.1e-27
TRINITY_DN15223_c0_g1	sp|Q7SXP4|SRS1A_DANRE	srsf1a	Serine/arginine-rich splicing factor 1A OS=Danio rerio GN=srsf1a PE=2 SV=2	100	1.4e-49
TRINITY_DN15224_c1_g1	sp|Q56JV1|RS26_BOVIN	RPS26	40S ribosomal protein S26 OS=Bos taurus GN=RPS26 PE=3 SV=3	99	9.1e-49
TRINITY_DN15224_c1_g2	sp|Q56JV1|RS26_BOVIN	RPS26	40S ribosomal protein S26 OS=Bos taurus GN=RPS26 PE=3 SV=3	99	7.3e-52
TRINITY_DN15224_c1_g3	sp|Q56JV1|RS26_BOVIN	RPS26	40S ribosomal protein S26 OS=Bos taurus GN=RPS26 PE=3 SV=3	96.3	3.8e-54
TRINITY_DN15229_c0_g1	sp|Q9LSX7|PEX22_ARATH	PEX22	Peroxisome biogenesis protein 22 OS=Arabidopsis thaliana GN=PEX22 PE=1 SV=1	88.9	3.3e-27
TRINITY_DN1522_c0_g1	sp|Q9LQ04|RMLCD_ARATH	NRS/ER	Bifunctional dTDP-4-dehydrorhamnose 3,5-epimerase/dTDP-4-dehydrorhamnose reductase OS=Arabidopsis thaliana GN=NRS/ER PE=1 SV=1	68.2	8.4e-20
TRINITY_DN15237_c0_g1	sp|O49603|CVIF2_ARATH	C/VIF2	Cell wall / vacuolar inhibitor of fructosidase 2 OS=Arabidopsis thaliana GN=C/VIF2 PE=1 SV=1	48.9	1e-37
TRINITY_DN15237_c0_g2	sp|O49603|CVIF2_ARATH	C/VIF2	Cell wall / vacuolar inhibitor of fructosidase 2 OS=Arabidopsis thaliana GN=C/VIF2 PE=1 SV=1	42.8	5.6e-36
TRINITY_DN1523_c0_g1	sp|Q9SYX1|LIL31_ARATH	LIL3.1	Light-harvesting complex-like protein 3 isotype 1, chloroplastic OS=Arabidopsis thaliana GN=LIL3.1 PE=1 SV=1	72.3	1.6e-20
TRINITY_DN15249_c0_g3	sp|Q6ZIX2|SMT1_ORYSJ	Smt1-1	Cycloartenol-C-24-methyltransferase 1 OS=Oryza sativa subsp. japonica GN=Smt1-1 PE=2 SV=1	100	8.1e-53
TRINITY_DN15254_c0_g1	sp|P81942|GSTP1_BUFBU	-	Glutathione S-transferase P 1 OS=Bufo bufo PE=1 SV=1	65.7	1.5e-19
TRINITY_DN15260_c0_g1	sp|P14009|14KD_DAUCA	-	14 kDa proline-rich protein DC2.15 OS=Daucus carota PE=2 SV=1	59.9	1.6e-29
TRINITY_DN15264_c0_g1	sp|P50888|RL24_HORVU	RPL24	60S ribosomal protein L24 OS=Hordeum vulgare GN=RPL24 PE=2 SV=1	89.5	7.8e-55
TRINITY_DN15269_c0_g1	sp|Q9FLN5|VA0E1_ARATH	VHA-e1	V-type proton ATPase subunit e1 OS=Arabidopsis thaliana GN=VHA-e1 PE=2 SV=1	80	1.3e-25
TRINITY_DN15271_c0_g1	sp|Q5ZI57|TPPC3_CHICK	TRAPPC3	Trafficking protein particle complex subunit 3 OS=Gallus gallus GN=TRAPPC3 PE=2 SV=1	61.7	5.1e-28
TRINITY_DN15274_c0_g2	sp|Q5ZMS3|IF2G_CHICK	EIF2S3	Eukaryotic translation initiation factor 2 subunit 3 OS=Gallus gallus GN=EIF2S3 PE=1 SV=1	89.9	2.1e-39
TRINITY_DN15274_c0_g3	sp|Q2KHU8|IF2G_BOVIN	EIF2S3	Eukaryotic translation initiation factor 2 subunit 3 OS=Bos taurus GN=EIF2S3 PE=2 SV=1	98.8	7.3e-39
TRINITY_DN15280_c0_g2	sp|Q6H7P8|SAP4_ORYSJ	SAP4	Zinc finger A20 and AN1 domain-containing stress-associated protein 4 OS=Oryza sativa subsp. japonica GN=SAP4 PE=2 SV=1	91.1	1.5e-19
TRINITY_DN15285_c0_g1	sp|P62866|RS30_BOVIN	FAU	40S ribosomal protein S30 OS=Bos taurus GN=FAU PE=3 SV=1	89.7	1.4e-21
TRINITY_DN15300_c0_g3	sp|Q949T8|ASHR3_ARATH	ASHR3	Histone-lysine N-methyltransferase ASHR3 OS=Arabidopsis thaliana GN=ASHR3 PE=1 SV=1	82.7	1.4e-21
TRINITY_DN15307_c0_g1	sp|Q20516|YV31_CAEEL	F47B7.1	UPF0057 membrane protein F47B7.1 OS=Caenorhabditis elegans GN=F47B7.1 PE=3 SV=1	70.7	9.4e-17
TRINITY_DN15315_c0_g1	sp|P32759|A1AT_CYPCA	-	Alpha-1-antitrypsin homolog OS=Cyprinus carpio PE=2 SV=1	50.4	5.9e-23
TRINITY_DN15315_c0_g2	sp|P32759|A1AT_CYPCA	-	Alpha-1-antitrypsin homolog OS=Cyprinus carpio PE=2 SV=1	53.8	6.2e-19
TRINITY_DN15315_c0_g3	sp|P32759|A1AT_CYPCA	-	Alpha-1-antitrypsin homolog OS=Cyprinus carpio PE=2 SV=1	53.4	2.8e-11
TRINITY_DN15323_c0_g1	sp|Q4I7K4|DED1_GIBZE	DED1	ATP-dependent RNA helicase DED1 OS=Gibberella zeae (strain PH-1 / ATCC MYA-4620 / FGSC 9075 / NRRL 31084) GN=DED1 PE=3 SV=1	78.5	3.6e-20
TRINITY_DN15325_c0_g1	sp|P14562|LAMP1_RAT	Lamp1	Lysosome-associated membrane glycoprotein 1 OS=Rattus norvegicus GN=Lamp1 PE=1 SV=1	96.4	2.3e-40
TRINITY_DN15326_c0_g1	sp|Q10LZ9|C3H23_ORYSJ	Os03g0329200	Zinc finger CCCH domain-containing protein 23 OS=Oryza sativa subsp. japonica GN=Os03g0329200 PE=2 SV=1	100	3.4e-34
TRINITY_DN15328_c0_g2	sp|Q680C0|GDL62_ARATH	At4g10955	GDSL esterase/lipase At4g10955 OS=Arabidopsis thaliana GN=At4g10955 PE=2 SV=1	51.9	1.2e-10
TRINITY_DN15334_c0_g1	sp|Q9FGZ9|UBL5_ARATH	UBL5	Ubiquitin-like protein 5 OS=Arabidopsis thaliana GN=UBL5 PE=3 SV=1	93.2	3.4e-34
TRINITY_DN15335_c0_g1	sp|Q6AVI0|RSLE2_ORYSJ	Os03g0733400	Zinc finger BED domain-containing protein RICESLEEPER 2 OS=Oryza sativa subsp. japonica GN=Os03g0733400 PE=2 SV=1	100	7.5e-35
TRINITY_DN15335_c0_g2	sp|Q6AVI0|RSLE2_ORYSJ	Os03g0733400	Zinc finger BED domain-containing protein RICESLEEPER 2 OS=Oryza sativa subsp. japonica GN=Os03g0733400 PE=2 SV=1	100	6e-35
TRINITY_DN15339_c0_g1	sp|Q8HXB8|RL29_MACFA	RPL29	60S ribosomal protein L29 OS=Macaca fascicularis GN=RPL29 PE=2 SV=3	92.7	2.6e-20
TRINITY_DN15339_c0_g2	sp|Q58DW3|RL29_BOVIN	RPL29	60S ribosomal protein L29 OS=Bos taurus GN=RPL29 PE=2 SV=3	88.7	2.3e-24
TRINITY_DN15339_c0_g3	sp|P47914|RL29_HUMAN	RPL29	60S ribosomal protein L29 OS=Homo sapiens GN=RPL29 PE=1 SV=2	100	3.4e-61
TRINITY_DN15339_c0_g4	sp|Q58DW3|RL29_BOVIN	RPL29	60S ribosomal protein L29 OS=Bos taurus GN=RPL29 PE=2 SV=3	92.7	9.1e-23
TRINITY_DN15345_c0_g1	sp|Q9SVY0|NRPA1_ARATH	NRPA1	DNA-directed RNA polymerase I subunit 1 OS=Arabidopsis thaliana GN=NRPA1 PE=3 SV=1	46.9	6.1e-17
TRINITY_DN15349_c0_g1	sp|Q6ID77|MED11_ARATH	MED11	Mediator of RNA polymerase II transcription subunit 11 OS=Arabidopsis thaliana GN=MED11 PE=1 SV=1	71.2	7e-42
TRINITY_DN15350_c0_g1	sp|Q67YC0|PPSP1_ARATH	PS2	Inorganic pyrophosphatase 1 OS=Arabidopsis thaliana GN=PS2 PE=1 SV=1	60.5	2.2e-86
TRINITY_DN15351_c0_g1	sp|P04973|CLCA_BOVIN	CLTA	Clathrin light chain A OS=Bos taurus GN=CLTA PE=1 SV=1	63.8	1.4e-31
TRINITY_DN15354_c0_g1	sp|Q3T104|SC61G_BOVIN	SEC61G	Protein transport protein Sec61 subunit gamma OS=Bos taurus GN=SEC61G PE=3 SV=1	100	3.8e-31
TRINITY_DN15358_c0_g1	sp|P24821|TENA_HUMAN	TNC	Tenascin OS=Homo sapiens GN=TNC PE=1 SV=3	40.2	2.1e-10
TRINITY_DN15363_c0_g2	sp|Q05D44|IF2P_MOUSE	Eif5b	Eukaryotic translation initiation factor 5B OS=Mus musculus GN=Eif5b PE=1 SV=2	62.7	9.7e-19
TRINITY_DN15372_c0_g2	sp|Q64151|SEM4C_MOUSE	Sema4c	Semaphorin-4C OS=Mus musculus GN=Sema4c PE=1 SV=1	48.1	1.4e-15
TRINITY_DN15374_c0_g1	sp|Q9LS48|SG1_ARATH	SG1	protein SLOW GREEN 1, chloroplastic OS=Arabidopsis thaliana GN=SG1 PE=1 SV=1	40.2	3.2e-14
TRINITY_DN15378_c0_g3	sp|Q7T3B0|EIF3M_DANRE	eif3m	Eukaryotic translation initiation factor 3 subunit M OS=Danio rerio GN=eif3m PE=2 SV=2	96.8	6.1e-27
TRINITY_DN15390_c0_g1	sp|Q99612|KLF6_HUMAN	KLF6	Krueppel-like factor 6 OS=Homo sapiens GN=KLF6 PE=1 SV=3	68.9	1.8e-31
TRINITY_DN15394_c0_g1	sp|Q40468|IF415_TOBAC	-	Eukaryotic initiation factor 4A-15 OS=Nicotiana tabacum PE=2 SV=1	91	2.5e-29
TRINITY_DN15396_c0_g1	sp|Q7TNU7|LETM2_MOUSE	Letm2	LETM1 domain-containing protein LETM2, mitochondrial OS=Mus musculus GN=Letm2 PE=1 SV=1	85.7	5.1e-18
TRINITY_DN15398_c0_g1	sp|Q6TPK4|CYT1_ACTDE	-	Cysteine proteinase inhibitor 1 OS=Actinidia deliciosa PE=1 SV=1	48.1	4.6e-17
TRINITY_DN15399_c0_g1	sp|Q9H611|PIF1_HUMAN	PIF1	ATP-dependent DNA helicase PIF1 OS=Homo sapiens GN=PIF1 PE=1 SV=2	37.5	3.6e-12
TRINITY_DN15406_c0_g1	sp|A5PK19|MET13_BOVIN	METTL13	Methyltransferase-like protein 13 OS=Bos taurus GN=METTL13 PE=2 SV=1	33.7	8.9e-22
TRINITY_DN15409_c0_g1	sp|P52894|ALA2_HORVU	-	Alanine aminotransferase 2 OS=Hordeum vulgare PE=1 SV=1	90	4.1e-30
TRINITY_DN15426_c0_g1	sp|A8P5H7|AMPP1_COPC7	AMPP	Probable Xaa-Pro aminopeptidase P OS=Coprinopsis cinerea (strain Okayama-7 / 130 / ATCC MYA-4618 / FGSC 9003) GN=AMPP PE=3 SV=1	58.1	6.2e-21
TRINITY_DN15429_c0_g1	sp|Q7ZXB8|PAB2B_XENLA	pabpn1-b	Polyadenylate-binding protein 2-B OS=Xenopus laevis GN=pabpn1-b PE=2 SV=1	94	7.9e-41
TRINITY_DN15436_c0_g1	sp|O96000|NDUBA_HUMAN	NDUFB10	NADH dehydrogenase [ubiquinone] 1 beta subcomplex subunit 10 OS=Homo sapiens GN=NDUFB10 PE=1 SV=3	100	3.2e-32
TRINITY_DN15446_c0_g1	sp|Q9Y2X3|NOP58_HUMAN	NOP58	Nucleolar protein 58 OS=Homo sapiens GN=NOP58 PE=1 SV=1	84.6	4.6e-24
TRINITY_DN15449_c0_g2	sp|P0C8Q8|PP394_ARATH	PCMP-E42	Pentatricopeptide repeat-containing protein At5g19020, mitochondrial OS=Arabidopsis thaliana GN=PCMP-E42 PE=2 SV=1	55.3	4.8e-19
TRINITY_DN15458_c0_g2	sp|Q6NWK2|AP2MA_DANRE	ap2m1a	AP-2 complex subunit mu-A OS=Danio rerio GN=ap2m1a PE=2 SV=1	100	4.1e-39
TRINITY_DN15471_c0_g1	sp|A7Z019|SMCA4_BOVIN	SMARCA4	Transcription activator BRG1 OS=Bos taurus GN=SMARCA4 PE=2 SV=1	100	3.6e-14
TRINITY_DN15484_c0_g1	sp|Q9W6H5|UBC9A_DANRE	ube2ia	SUMO-conjugating enzyme UBC9-A OS=Danio rerio GN=ube2ia PE=1 SV=1	100	8.9e-38
TRINITY_DN15485_c0_g1	sp|Q2KIE4|MCTS1_BOVIN	MCTS1	Malignant T-cell-amplified sequence 1 OS=Bos taurus GN=MCTS1 PE=2 SV=1	41.8	4.1e-46
TRINITY_DN15486_c0_g2	sp|P53451|TCPD_TAKRU	cct4	T-complex protein 1 subunit delta OS=Takifugu rubripes GN=cct4 PE=2 SV=1	92.9	2.6e-29
TRINITY_DN15490_c0_g1	sp|O81117|C94A1_VICSA	CYP94A1	Cytochrome P450 94A1 OS=Vicia sativa GN=CYP94A1 PE=2 SV=2	80.2	2.8e-33
TRINITY_DN15491_c1_g1	sp|Q8RWE8|GGAP1_ARATH	VTC2	GDP-L-galactose phosphorylase 1 OS=Arabidopsis thaliana GN=VTC2 PE=1 SV=1	74.7	2.6e-28
TRINITY_DN15491_c1_g2	sp|P31580|HCE1_ORYLA	hcea	High choriolytic enzyme 1 OS=Oryzias latipes GN=hcea PE=1 SV=1	49.3	3.3e-58
TRINITY_DN15496_c0_g1	sp|Q6PCR7|EIF3A_DANRE	eif3a	Eukaryotic translation initiation factor 3 subunit A OS=Danio rerio GN=eif3a PE=2 SV=1	100	7e-36
TRINITY_DN15497_c0_g1	sp|Q9D0E1|HNRPM_MOUSE	Hnrnpm	Heterogeneous nuclear ribonucleoprotein M OS=Mus musculus GN=Hnrnpm PE=1 SV=3	84.3	1.4e-30
TRINITY_DN15501_c0_g2	sp|Q9XI05|PSB3A_ARATH	PBC1	Proteasome subunit beta type-3-A OS=Arabidopsis thaliana GN=PBC1 PE=1 SV=2	94.5	1.7e-32
TRINITY_DN15502_c0_g3	sp|Q7ZV55|EIF3I_DANRE	eif3i	Eukaryotic translation initiation factor 3 subunit I OS=Danio rerio GN=eif3i PE=2 SV=1	97.1	7e-35
TRINITY_DN15505_c0_g1	sp|Q9NHZ4|OAZ_PRIPA	-	Ornithine decarboxylase antizyme OS=Pristionchus pacificus PE=2 SV=1	39.7	1.7e-11
TRINITY_DN15509_c0_g1	sp|P13127|CAZA1_CHICK	CAPZA1	F-actin-capping protein subunit alpha-1 OS=Gallus gallus GN=CAPZA1 PE=1 SV=1	86.6	1e-37
TRINITY_DN15526_c0_g1	sp|P40590|RL34_PEA	RPL34	60S ribosomal protein L34 OS=Pisum sativum GN=RPL34 PE=2 SV=1	95	1.9e-56
TRINITY_DN15527_c0_g1	sp|Q6BSZ4|PACC_DEBHA	RIM101	pH-response transcription factor pacC/RIM101 OS=Debaryomyces hansenii (strain ATCC 36239 / CBS 767 / JCM 1990 / NBRC 0083 / IGC 2968) GN=RIM101 PE=3 SV=2	69.1	2.9e-16
TRINITY_DN15533_c0_g2	sp|B9DFI7|PMT2_ARATH	At1g26850	Probable methyltransferase PMT2 OS=Arabidopsis thaliana GN=At1g26850 PE=2 SV=2	87.1	1.2e-34
TRINITY_DN15543_c0_g1	sp|Q9NR30|DDX21_HUMAN	DDX21	Nucleolar RNA helicase 2 OS=Homo sapiens GN=DDX21 PE=1 SV=5	70.9	2.3e-27
TRINITY_DN15543_c0_g5	sp|Q3B8Q1|DDX21_RAT	Ddx21	Nucleolar RNA helicase 2 OS=Rattus norvegicus GN=Ddx21 PE=2 SV=1	66.3	6.1e-28
TRINITY_DN15548_c0_g1	sp|Q6KAJ8|RL391_ORYSJ	RPL39A	60S ribosomal protein L39-1 OS=Oryza sativa subsp. japonica GN=RPL39A PE=3 SV=2	100	1.2e-23
TRINITY_DN15549_c0_g1	sp|P09445|EF2_CRIGR	EEF2	Elongation factor 2 OS=Cricetulus griseus GN=EEF2 PE=1 SV=4	96	1.3e-96
TRINITY_DN15549_c0_g2	sp|Q3SYU2|EF2_BOVIN	EEF2	Elongation factor 2 OS=Bos taurus GN=EEF2 PE=2 SV=3	97.7	4.3e-42
TRINITY_DN15553_c0_g1	sp|Q5PNY6|PUB21_ARATH	PUB21	U-box domain-containing protein 21 OS=Arabidopsis thaliana GN=PUB21 PE=2 SV=1	40.3	4.5e-08
TRINITY_DN15556_c0_g1	sp|Q9MAP3|RK11_ARATH	RPL11	50S ribosomal protein L11, chloroplastic OS=Arabidopsis thaliana GN=RPL11 PE=2 SV=1	81.6	1e-80
TRINITY_DN15563_c0_g1	sp|Q90339|MYSS_CYPCA	-	Myosin heavy chain, fast skeletal muscle OS=Cyprinus carpio PE=2 SV=2	89.8	1.6e-39
TRINITY_DN15566_c0_g3	sp|P73300|RL36_SYNY3	rpmJ	50S ribosomal protein L36 OS=Synechocystis sp. (strain PCC 6803 / Kazusa) GN=rpmJ PE=3 SV=1	76.3	1.6e-10
TRINITY_DN15576_c0_g2	sp|Q3ZCH0|GRP75_BOVIN	HSPA9	Stress-70 protein, mitochondrial OS=Bos taurus GN=HSPA9 PE=2 SV=1	91.4	8.2e-35
TRINITY_DN15577_c0_g1	sp|P41344|FENR1_ORYSJ	Os06g0107700	Ferredoxin--NADP reductase, leaf isozyme, chloroplastic OS=Oryza sativa subsp. japonica GN=Os06g0107700 PE=2 SV=1	88.7	6.3e-31
TRINITY_DN15586_c0_g1	sp|Q8RWN9|ODP22_ARATH	At3g13930	Dihydrolipoyllysine-residue acetyltransferase component 2 of pyruvate dehydrogenase complex, mitochondrial OS=Arabidopsis thaliana GN=At3g13930 PE=1 SV=2	84.3	1.1e-34
TRINITY_DN15586_c0_g3	sp|Q5M729|ODP23_ARATH	At1g54220	Dihydrolipoyllysine-residue acetyltransferase component 3 of pyruvate dehydrogenase complex, mitochondrial OS=Arabidopsis thaliana GN=At1g54220 PE=1 SV=1	80.8	3.7e-31
TRINITY_DN15589_c0_g1	sp|Q5SPB1|S38A2_DANRE	slc38a2	Sodium-coupled neutral amino acid transporter 2 OS=Danio rerio GN=slc38a2 PE=3 SV=1	84.9	2.7e-31
TRINITY_DN15589_c0_g4	sp|Q5SPB1|S38A2_DANRE	slc38a2	Sodium-coupled neutral amino acid transporter 2 OS=Danio rerio GN=slc38a2 PE=3 SV=1	95.7	5.5e-32
TRINITY_DN15602_c0_g1	sp|O64843|CID7_ARATH	CID7	Polyadenylate-binding protein-interacting protein 7 OS=Arabidopsis thaliana GN=CID7 PE=1 SV=1	64	2e-20
TRINITY_DN15605_c0_g1	sp|Q940S0|TMN2_ARATH	TMN2	Transmembrane 9 superfamily member 2 OS=Arabidopsis thaliana GN=TMN2 PE=2 SV=1	95.5	1.4e-31
TRINITY_DN15606_c0_g1	sp|P51903|PGK_CHICK	PGK	Phosphoglycerate kinase OS=Gallus gallus GN=PGK PE=2 SV=2	88.2	1.8e-27
TRINITY_DN15607_c0_g1	sp|Q6ZQL4|WDR43_MOUSE	Wdr43	WD repeat-containing protein 43 OS=Mus musculus GN=Wdr43 PE=2 SV=2	65.6	3.2e-14
TRINITY_DN15610_c0_g2	sp|P85968|6PGD_RAT	Pgd	6-phosphogluconate dehydrogenase, decarboxylating OS=Rattus norvegicus GN=Pgd PE=1 SV=1	87.3	6.7e-50
TRINITY_DN15611_c0_g3	sp|Q58DM3|CD53_BOVIN	CD53	Leukocyte surface antigen CD53 OS=Bos taurus GN=CD53 PE=2 SV=1	45.5	8.7e-08
TRINITY_DN15612_c0_g1	sp|P51110|DFRA_VITVI	DFR	Dihydroflavonol 4-reductase OS=Vitis vinifera GN=DFR PE=1 SV=1	38.9	2.9e-54
TRINITY_DN15617_c0_g1	sp|C5P4Z8|SUB8_COCP7	CPC735_031240	Subtilisin-like protease CPC735_031240 OS=Coccidioides posadasii (strain C735) GN=CPC735_031240 PE=3 SV=1	59.1	1.4e-27
TRINITY_DN15620_c0_g1	sp|Q941L0|CESA3_ARATH	CESA3	Cellulose synthase A catalytic subunit 3 [UDP-forming] OS=Arabidopsis thaliana GN=CESA3 PE=1 SV=2	71.2	1.4e-22
TRINITY_DN15629_c0_g1	sp|Q9C827|COB22_ARATH	At1g52360	Coatomer subunit beta'-2 OS=Arabidopsis thaliana GN=At1g52360 PE=1 SV=1	73.8	8.9e-27
TRINITY_DN15636_c1_g1	sp|A8K2U0|A2ML1_HUMAN	A2ML1	Alpha-2-macroglobulin-like protein 1 OS=Homo sapiens GN=A2ML1 PE=1 SV=3	48.9	1.1e-13
TRINITY_DN15636_c1_g2	sp|Q6IE52|MUG2_RAT	Mug2	Murinoglobulin-2 OS=Rattus norvegicus GN=Mug2 PE=1 SV=1	55	5.1e-39
TRINITY_DN15636_c1_g3	sp|P06238|A2MG_RAT	A2m	Alpha-2-macroglobulin OS=Rattus norvegicus GN=A2m PE=2 SV=2	45.1	6.3e-14
TRINITY_DN15639_c0_g1	sp|P47955|RLA1_MOUSE	Rplp1	60S acidic ribosomal protein P1 OS=Mus musculus GN=Rplp1 PE=1 SV=1	86.6	9.6e-28
TRINITY_DN15639_c0_g2	sp|P05387|RLA2_HUMAN	RPLP2	60S acidic ribosomal protein P2 OS=Homo sapiens GN=RPLP2 PE=1 SV=1	76.1	2e-21
TRINITY_DN15639_c0_g3	sp|Q6X9Z5|RLA2_HORSE	RPLP2	60S acidic ribosomal protein P2 OS=Equus caballus GN=RPLP2 PE=3 SV=1	78.9	2.9e-23
TRINITY_DN15643_c0_g1	sp|O22914|CP121_ARATH	CP12-1	Calvin cycle protein CP12-1, chloroplastic OS=Arabidopsis thaliana GN=CP12-1 PE=1 SV=1	50	1.8e-23
TRINITY_DN15644_c0_g2	sp|Q9IB84|PSB1A_CARAU	psmb1-A	Proteasome subunit beta type-1-A OS=Carassius auratus GN=psmb1-A PE=2 SV=1	100	3.8e-33
TRINITY_DN15645_c0_g1	sp|Q22285|TTR46_CAEEL	ttr-46	Transthyretin-like protein 46 OS=Caenorhabditis elegans GN=ttr-46 PE=3 SV=1	54.5	9.4e-12
TRINITY_DN15659_c0_g1	sp|Q8JFP1|IF4A2_CHICK	EIF4A2	Eukaryotic initiation factor 4A-II OS=Gallus gallus GN=EIF4A2 PE=2 SV=1	97.1	1.7e-33
TRINITY_DN15659_c0_g2	sp|Q3SZ65|IF4A2_BOVIN	EIF4A2	Eukaryotic initiation factor 4A-II OS=Bos taurus GN=EIF4A2 PE=2 SV=1	98.6	7.4e-35
TRINITY_DN15659_c0_g3	sp|Q8JFP1|IF4A2_CHICK	EIF4A2	Eukaryotic initiation factor 4A-II OS=Gallus gallus GN=EIF4A2 PE=2 SV=1	97.2	8.7e-53
TRINITY_DN15664_c0_g1	sp|P42225|STAT1_MOUSE	Stat1	Signal transducer and activator of transcription 1 OS=Mus musculus GN=Stat1 PE=1 SV=1	65.9	6e-28
TRINITY_DN15666_c0_g3	sp|Q14765|STAT4_HUMAN	STAT4	Signal transducer and activator of transcription 4 OS=Homo sapiens GN=STAT4 PE=1 SV=1	68.9	4.1e-23
TRINITY_DN15673_c0_g1	sp|P17771|OSP4_PEA	-	Organ-specific protein P4 OS=Pisum sativum PE=2 SV=1	53.7	1.5e-11
TRINITY_DN15678_c0_g1	sp|Q9UEY8|ADDG_HUMAN	ADD3	Gamma-adducin OS=Homo sapiens GN=ADD3 PE=1 SV=1	82.1	7.9e-26
TRINITY_DN15681_c0_g1	sp|Q9BZE4|NOG1_HUMAN	GTPBP4	Nucleolar GTP-binding protein 1 OS=Homo sapiens GN=GTPBP4 PE=1 SV=3	96.1	1.2e-35
TRINITY_DN15681_c0_g2	sp|Q9BZE4|NOG1_HUMAN	GTPBP4	Nucleolar GTP-binding protein 1 OS=Homo sapiens GN=GTPBP4 PE=1 SV=3	68.9	7.7e-23
TRINITY_DN15682_c0_g1	sp|Q9LQM8|M2K10_ARATH	MKK10	Mitogen-activated protein kinase kinase 10 OS=Arabidopsis thaliana GN=MKK10 PE=1 SV=1	48.3	8.8e-13
TRINITY_DN15687_c0_g2	sp|O42204|ITM2B_CHICK	ITM2B	Integral membrane protein 2B OS=Gallus gallus GN=ITM2B PE=2 SV=1	81.2	4.5e-33
TRINITY_DN15688_c0_g1	sp|Q9SGA6|RS191_ARATH	RPS19A	40S ribosomal protein S19-1 OS=Arabidopsis thaliana GN=RPS19A PE=2 SV=1	86.2	2e-63
TRINITY_DN15692_c0_g2	sp|P17790|BASI_CHICK	BSG	Basigin OS=Gallus gallus GN=BSG PE=1 SV=2	76.9	2e-16
TRINITY_DN15695_c0_g1	sp|Q9XFR5|SR30_ARATH	SR30	Serine/arginine-rich splicing factor SR30 OS=Arabidopsis thaliana GN=SR30 PE=1 SV=1	72.9	2.1e-18
TRINITY_DN15696_c1_g1	sp|Q3T169|RS3_BOVIN	RPS3	40S ribosomal protein S3 OS=Bos taurus GN=RPS3 PE=2 SV=1	100	2.2e-55
TRINITY_DN15696_c1_g2	sp|P02350|RS31_XENLA	rps3-a	40S ribosomal protein S3-A OS=Xenopus laevis GN=rps3-a PE=2 SV=2	100	8.7e-75
TRINITY_DN15702_c0_g2	sp|P06454|PTMA_HUMAN	PTMA	Prothymosin alpha OS=Homo sapiens GN=PTMA PE=1 SV=2	100	8e-13
TRINITY_DN15709_c0_g1	sp|Q9H0I9|TKTL2_HUMAN	TKTL2	Transketolase-like protein 2 OS=Homo sapiens GN=TKTL2 PE=2 SV=1	66.7	2.4e-25
TRINITY_DN1570_c0_g1	sp|Q03773|E13A_SOYBN	-	Glucan endo-1,3-beta-glucosidase OS=Glycine max PE=1 SV=1	100	2.6e-110
TRINITY_DN1570_c0_g2	sp|Q03773|E13A_SOYBN	-	Glucan endo-1,3-beta-glucosidase OS=Glycine max PE=1 SV=1	100	3.7e-79
TRINITY_DN1571_c0_g1	sp|Q9SXX7|COX5C_ORYSJ	COX5C	Cytochrome c oxidase subunit 5C OS=Oryza sativa subsp. japonica GN=COX5C PE=3 SV=3	100	9.6e-31
TRINITY_DN15721_c0_g1	sp|Q9XGY4|TIM8_ARATH	TIM8	Mitochondrial import inner membrane translocase subunit TIM8 OS=Arabidopsis thaliana GN=TIM8 PE=1 SV=1	73.7	8.6e-29
TRINITY_DN15723_c0_g1	sp|Q7ZUG5|RS21_DANRE	rps21	40S ribosomal protein S21 OS=Danio rerio GN=rps21 PE=3 SV=1	100	1.7e-39
TRINITY_DN15725_c0_g1	sp|F4IIM1|CSI1_ARATH	CSI1	Protein CELLULOSE SYNTHASE INTERACTIVE 1 OS=Arabidopsis thaliana GN=CSI1 PE=1 SV=1	75	1.5e-11
TRINITY_DN15740_c0_g2	sp|A2XBN5|NLTPX_ORYSI	LTP-2	Non-specific lipid-transfer protein 2 OS=Oryza sativa subsp. indica GN=LTP-2 PE=3 SV=2	39.1	6.1e-11
TRINITY_DN15747_c0_g2	sp|Q9M8Y0|SEC_ARATH	SEC	Probable UDP-N-acetylglucosamine--peptide N-acetylglucosaminyltransferase SEC OS=Arabidopsis thaliana GN=SEC PE=2 SV=1	80.8	3.1e-31
TRINITY_DN15750_c0_g1	sp|P81015|GRN3_CYPCA	-	Granulin-3 OS=Cyprinus carpio PE=1 SV=1	100	8e-23
TRINITY_DN15751_c0_g1	sp|Q32LC7|G3BP1_BOVIN	G3BP	Ras GTPase-activating protein-binding protein 1 OS=Bos taurus GN=G3BP PE=2 SV=1	92.2	9.1e-21
TRINITY_DN15755_c1_g7	sp|P26204|BGLS_TRIRP	-	Non-cyanogenic beta-glucosidase OS=Trifolium repens PE=1 SV=1	51.5	1.5e-11
TRINITY_DN15760_c0_g1	sp|A2XMB2|PROA_ORYSI	OsI_013205	10 kDa prolamin OS=Oryza sativa subsp. indica GN=OsI_013205 PE=2 SV=2	98.5	6.5e-59
TRINITY_DN15763_c0_g1	sp|Q9M5L0|RL35_EUPES	RPL35	60S ribosomal protein L35 OS=Euphorbia esula GN=RPL35 PE=2 SV=1	92.7	1.1e-53
TRINITY_DN15764_c0_g1	sp|Q8VZ20|ASR3_ARATH	ASR3	Trihelix transcription factor ASR3 OS=Arabidopsis thaliana GN=ASR3 PE=1 SV=1	52.8	4.4e-74
TRINITY_DN15773_c0_g1	sp|Q9LUB9|Y5813_ARATH	At5g48130	BTB/POZ domain-containing protein At5g48130 OS=Arabidopsis thaliana GN=At5g48130 PE=2 SV=1	56	9e-20
TRINITY_DN15773_c0_g5	sp|Q9LUB9|Y5813_ARATH	At5g48130	BTB/POZ domain-containing protein At5g48130 OS=Arabidopsis thaliana GN=At5g48130 PE=2 SV=1	49.3	3e-15
TRINITY_DN15774_c0_g3	sp|Q62009|POSTN_MOUSE	Postn	Periostin OS=Mus musculus GN=Postn PE=1 SV=2	63.1	1.4e-18
TRINITY_DN15775_c0_g1	sp|Q9LIN3|RZ1A_ARATH	RZ1A	Glycine-rich RNA-binding protein RZ1A OS=Arabidopsis thaliana GN=RZ1A PE=1 SV=1	66.1	8.2e-20
TRINITY_DN15776_c0_g3	sp|P45879|VDAC1_BOVIN	VDAC1	Voltage-dependent anion-selective channel protein 1 OS=Bos taurus GN=VDAC1 PE=1 SV=3	90.6	3.7e-27
TRINITY_DN15778_c0_g1	sp|P63028|TCTP_MOUSE	Tpt1	Translationally-controlled tumor protein OS=Mus musculus GN=Tpt1 PE=1 SV=1	99.4	5.9e-94
TRINITY_DN1577_c0_g1	sp|Q7XTJ3|ODPA3_ORYSJ	Os04g0119400	Pyruvate dehydrogenase E1 component subunit alpha-3, chloroplastic OS=Oryza sativa subsp. japonica GN=Os04g0119400 PE=2 SV=2	100	7.7e-12
TRINITY_DN15788_c0_g2	sp|Q8GT21|BEBT_CLABR	-	Benzyl alcohol O-benzoyltransferase OS=Clarkia breweri PE=1 SV=1	58.9	6.6e-13
TRINITY_DN15789_c0_g1	sp|Q8NC51|PAIRB_HUMAN	SERBP1	Plasminogen activator inhibitor 1 RNA-binding protein OS=Homo sapiens GN=SERBP1 PE=1 SV=2	93.9	2e-12
TRINITY_DN15801_c0_g3	sp|O04834|SAR1A_ARATH	SAR1A	GTP-binding protein SAR1A OS=Arabidopsis thaliana GN=SAR1A PE=2 SV=1	94.4	2e-32
TRINITY_DN15804_c0_g1	sp|Q40746|NIP11_ORYSJ	NIP1-1	Aquaporin NIP1-1 OS=Oryza sativa subsp. japonica GN=NIP1-1 PE=2 SV=1	70.5	4.2e-92
TRINITY_DN1581_c0_g1	sp|P48556|PSMD8_HUMAN	PSMD8	26S proteasome non-ATPase regulatory subunit 8 OS=Homo sapiens GN=PSMD8 PE=1 SV=2	100	4.4e-48
TRINITY_DN15821_c0_g1	sp|Q9SFU0|SC24A_ARATH	At3g07100	Protein transport protein Sec24-like At3g07100 OS=Arabidopsis thaliana GN=At3g07100 PE=2 SV=2	64.4	2.8e-21
TRINITY_DN15822_c0_g1	sp|P00703|LYSC_MELGA	LYZ	Lysozyme C OS=Meleagris gallopavo GN=LYZ PE=1 SV=2	48.2	2.6e-32
TRINITY_DN15824_c0_g1	sp|A2BE76|CP072_DANRE	si:dkey-20i6.3	UPF0472 protein C16orf72 homolog OS=Danio rerio GN=si:dkey-20i6.3 PE=2 SV=1	97.4	1e-14
TRINITY_DN15826_c0_g1	sp|Q93ZV7|LA1_ARATH	LA1	La protein 1 OS=Arabidopsis thaliana GN=LA1 PE=1 SV=1	58.7	6e-74
TRINITY_DN15826_c0_g2	sp|Q93ZV7|LA1_ARATH	LA1	La protein 1 OS=Arabidopsis thaliana GN=LA1 PE=1 SV=1	71.9	1.5e-30
TRINITY_DN15830_c0_g2	sp|Q9MZT8|MYC_PTEHP	MYC	Myc proto-oncogene protein OS=Pteropus hypomelanus GN=MYC PE=3 SV=1	50	9.6e-15
TRINITY_DN15838_c0_g2	sp|P94077|LSD1_ARATH	LSD1	Protein LSD1 OS=Arabidopsis thaliana GN=LSD1 PE=1 SV=1	67.9	1.2e-13
TRINITY_DN15847_c0_g2	sp|O23063|STKLP_ARATH	At4g00390	Probable transcription factor At4g00390 OS=Arabidopsis thaliana GN=At4g00390 PE=2 SV=1	43.2	3.6e-18
TRINITY_DN15864_c0_g1	sp|Q66GI2|DIR22_ARATH	DIR22	Dirigent protein 22 OS=Arabidopsis thaliana GN=DIR22 PE=2 SV=1	32.5	1.3e-07
TRINITY_DN15869_c0_g1	sp|Q9SU71|EDSBC_ARATH	EDS1B	Protein EDS1B OS=Arabidopsis thaliana GN=EDS1B PE=1 SV=1	41.3	9.6e-116
TRINITY_DN15879_c0_g1	sp|Q9SK27|ENL1_ARATH	At2g25060	Early nodulin-like protein 1 OS=Arabidopsis thaliana GN=At2g25060 PE=1 SV=2	41.7	5.4e-09
TRINITY_DN15880_c0_g1	sp|Q32L22|RPAC1_BOVIN	POLR1C	DNA-directed RNA polymerases I and III subunit RPAC1 OS=Bos taurus GN=POLR1C PE=2 SV=1	45	9.7e-80
TRINITY_DN15892_c0_g1	sp|Q9PSX7|RHOC_CHICK	RHOC	Rho-related GTP-binding protein RhoC OS=Gallus gallus GN=RHOC PE=1 SV=1	98.7	2.6e-85
TRINITY_DN15897_c0_g1	sp|P29391|FRIL1_MOUSE	Ftl1	Ferritin light chain 1 OS=Mus musculus GN=Ftl1 PE=1 SV=2	99.5	5e-100
TRINITY_DN15899_c0_g1	sp|Q6P1R4|DUS1L_HUMAN	DUS1L	tRNA-dihydrouridine(16/17) synthase [NAD(P)(+)]-like OS=Homo sapiens GN=DUS1L PE=1 SV=1	47.6	1.7e-74
TRINITY_DN1589_c0_g1	sp|P16070|CD44_HUMAN	CD44	CD44 antigen OS=Homo sapiens GN=CD44 PE=1 SV=3	100	1.5e-22
TRINITY_DN15904_c0_g1	sp|O23052|Y1515_ARATH	At1g05150	Uncharacterized TPR repeat-containing protein At1g05150 OS=Arabidopsis thaliana GN=At1g05150 PE=1 SV=1	74.4	4.7e-275
TRINITY_DN15906_c0_g1	sp|P36964|DMB_SQUAC	-	Proteolipid protein DM beta OS=Squalus acanthias PE=2 SV=1	89.6	2.5e-30
TRINITY_DN15907_c0_g1	sp|Q94AW5|ERF03_ARATH	ERF003	Ethylene-responsive transcription factor ERF003 OS=Arabidopsis thaliana GN=ERF003 PE=2 SV=1	55.4	1e-45
TRINITY_DN15914_c0_g1	sp|Q94K05|TCPQ_ARATH	CCT8	T-complex protein 1 subunit theta OS=Arabidopsis thaliana GN=CCT8 PE=1 SV=1	85.9	1.5e-24
TRINITY_DN15915_c0_g1	sp|Q9FMF5|RPT3_ARATH	RPT3	Root phototropism protein 3 OS=Arabidopsis thaliana GN=RPT3 PE=1 SV=2	65.7	1.8e-250
TRINITY_DN15916_c0_g1	sp|P25864|RK9_ARATH	RPL9	50S ribosomal protein L9, chloroplastic OS=Arabidopsis thaliana GN=RPL9 PE=2 SV=1	70.2	3.2e-71
TRINITY_DN15924_c0_g1	sp|Q682I1|BOLA1_ARATH	BOLA1	Protein BOLA1, chloroplastic OS=Arabidopsis thaliana GN=BOLA1 PE=1 SV=1	55.9	2.6e-24
TRINITY_DN15929_c0_g1	sp|Q9SUV2|PT432_ARATH	At4g32390	Probable sugar phosphate/phosphate translocator At4g32390 OS=Arabidopsis thaliana GN=At4g32390 PE=3 SV=1	84.4	4.5e-63
TRINITY_DN15930_c0_g1	sp|O04496|AED3_ARATH	AED3	Aspartyl protease AED3 OS=Arabidopsis thaliana GN=AED3 PE=1 SV=1	61.8	3.8e-21
TRINITY_DN15930_c0_g2	sp|O04496|AED3_ARATH	AED3	Aspartyl protease AED3 OS=Arabidopsis thaliana GN=AED3 PE=1 SV=1	73.4	1.5e-28
TRINITY_DN15932_c0_g1	sp|Q9FE06|EXOL2_ARATH	EXL2	Protein EXORDIUM-like 2 OS=Arabidopsis thaliana GN=EXL2 PE=2 SV=1	65.7	8.6e-15
TRINITY_DN15938_c0_g1	sp|Q6FIF0|ZFAN6_HUMAN	ZFAND6	AN1-type zinc finger protein 6 OS=Homo sapiens GN=ZFAND6 PE=1 SV=2	75	6.1e-17
TRINITY_DN15942_c0_g1	sp|Q39108|GGR_ARATH	GGR	Heterodimeric geranylgeranyl pyrophosphate synthase small subunit, chloroplastic OS=Arabidopsis thaliana GN=GGR PE=1 SV=2	68	4e-114
TRINITY_DN15958_c0_g1	sp|Q9FNC9|TOM92_ARATH	TOM9-2	Mitochondrial import receptor subunit TOM9-2 OS=Arabidopsis thaliana GN=TOM9-2 PE=1 SV=3	62.9	1.4e-23
TRINITY_DN15959_c0_g2	sp|Q91Z83|MYH7_MOUSE	Myh7	Myosin-7 OS=Mus musculus GN=Myh7 PE=2 SV=1	87.3	2.6e-32
TRINITY_DN15966_c0_g1	sp|Q9FMN4|TCLOT_ARATH	At5g42850	Thioredoxin-like protein Clot OS=Arabidopsis thaliana GN=At5g42850 PE=2 SV=1	58.8	1.9e-40
TRINITY_DN15969_c0_g1	sp|P17048|PRO25_ORYSJ	PROLM25	13 kDa prolamin C OS=Oryza sativa subsp. japonica GN=PROLM25 PE=2 SV=2	93.6	9.3e-75
TRINITY_DN15970_c0_g1	sp|Q84MC7|PYL9_ARATH	PYL9	Abscisic acid receptor PYL9 OS=Arabidopsis thaliana GN=PYL9 PE=1 SV=1	83.5	1.9e-63
TRINITY_DN15974_c0_g3	sp|F1RBN2|SPAG1_DANRE	spag1a	Sperm-associated antigen 1A OS=Danio rerio GN=spag1a PE=2 SV=1	81	6.1e-27
TRINITY_DN15983_c0_g1	sp|Q41144|STC_RICCO	STC	Sugar carrier protein C OS=Ricinus communis GN=STC PE=2 SV=1	79.6	7e-14
TRINITY_DN15987_c0_g1	sp|Q8VY81|NUD21_ARATH	NUDT21	Nudix hydrolase 21, chloroplastic OS=Arabidopsis thaliana GN=NUDT21 PE=2 SV=1	57.1	4.6e-16
TRINITY_DN15992_c0_g1	sp|O00303|EIF3F_HUMAN	EIF3F	Eukaryotic translation initiation factor 3 subunit F OS=Homo sapiens GN=EIF3F PE=1 SV=1	80.5	3.7e-71
TRINITY_DN1599_c0_g1	sp|Q9M1K2|PI5K4_ARATH	PIP5K4	Phosphatidylinositol 4-phosphate 5-kinase 4 OS=Arabidopsis thaliana GN=PIP5K4 PE=3 SV=1	47.3	1.4e-06
TRINITY_DN15_c0_g1	sp|Q6K548|VDAC1_ORYSJ	VDAC1	Mitochondrial outer membrane protein porin 1 OS=Oryza sativa subsp. japonica GN=VDAC1 PE=1 SV=3	100	4.8e-27
TRINITY_DN16004_c0_g1	sp|F4IIM1|CSI1_ARATH	CSI1	Protein CELLULOSE SYNTHASE INTERACTIVE 1 OS=Arabidopsis thaliana GN=CSI1 PE=1 SV=1	87.2	1.6e-29
TRINITY_DN16006_c0_g2	sp|Q9SY75|PPR30_ARATH	PCMP-E71	Putative pentatricopeptide repeat-containing protein At1g10330 OS=Arabidopsis thaliana GN=PCMP-E71 PE=3 SV=1	48.9	1.3e-14
TRINITY_DN16006_c0_g3	sp|Q9SY75|PPR30_ARATH	PCMP-E71	Putative pentatricopeptide repeat-containing protein At1g10330 OS=Arabidopsis thaliana GN=PCMP-E71 PE=3 SV=1	56	4.5e-17
TRINITY_DN16012_c0_g1	sp|P06738|PHSG_YEAST	GPH1	Glycogen phosphorylase OS=Saccharomyces cerevisiae (strain ATCC 204508 / S288c) GN=GPH1 PE=1 SV=4	77.9	3.3e-24
TRINITY_DN16012_c0_g2	sp|P06738|PHSG_YEAST	GPH1	Glycogen phosphorylase OS=Saccharomyces cerevisiae (strain ATCC 204508 / S288c) GN=GPH1 PE=1 SV=4	43.3	4.2e-08
TRINITY_DN16015_c0_g2	sp|Q16589|CCNG2_HUMAN	CCNG2	Cyclin-G2 OS=Homo sapiens GN=CCNG2 PE=2 SV=1	67.7	4.5e-29
TRINITY_DN16017_c0_g1	sp|Q9Y706|CYB5_MORAP	-	Cytochrome b5 OS=Mortierella alpina PE=1 SV=1	69.7	3.7e-21
TRINITY_DN16020_c1_g1	sp|Q9MIY0|NU5M_DANRE	mt-nd5	NADH-ubiquinone oxidoreductase chain 5 OS=Danio rerio GN=mt-nd5 PE=3 SV=1	93.2	6.7e-309
TRINITY_DN16020_c1_g2	sp|P11661|NU5M_RAT	Mtnd5	NADH-ubiquinone oxidoreductase chain 5 OS=Rattus norvegicus GN=Mtnd5 PE=3 SV=3	91.3	2.3e-42
TRINITY_DN16022_c0_g1	sp|Q9SJZ2|PER17_ARATH	PER17	Peroxidase 17 OS=Arabidopsis thaliana GN=PER17 PE=2 SV=1	77.8	2.8e-88
TRINITY_DN16023_c0_g1	sp|P28000|RPAC2_YEAST	RPC19	DNA-directed RNA polymerases I and III subunit RPAC2 OS=Saccharomyces cerevisiae (strain ATCC 204508 / S288c) GN=RPC19 PE=1 SV=1	40.9	7e-14
TRINITY_DN16024_c0_g2	sp|I1SSI5|MAX2A_PETHY	MAX2A	F-box/LRR-repeat MAX2 homolog A OS=Petunia hybrida GN=MAX2A PE=1 SV=1	66.5	2.4e-71
TRINITY_DN16024_c0_g3	sp|I1SSI5|MAX2A_PETHY	MAX2A	F-box/LRR-repeat MAX2 homolog A OS=Petunia hybrida GN=MAX2A PE=1 SV=1	68.2	4.5e-206
TRINITY_DN16026_c0_g1	sp|Q8VYR7|BOR1_ARATH	BOR1	Boron transporter 1 OS=Arabidopsis thaliana GN=BOR1 PE=1 SV=1	86.8	1.2e-13
TRINITY_DN16032_c0_g1	sp|O49710|HS154_ARATH	HSP15.4	15.4 kDa class V heat shock protein OS=Arabidopsis thaliana GN=HSP15.4 PE=2 SV=1	48.6	2.1e-28
TRINITY_DN16036_c0_g1	sp|Q9M7X7|RL291_ARATH	RPL29A	60S ribosomal protein L29-1 OS=Arabidopsis thaliana GN=RPL29A PE=1 SV=1	85.2	1e-22
TRINITY_DN16047_c0_g1	sp|Q5NUF4|HIDM_GLYEC	HIDM	2-hydroxyisoflavanone dehydratase OS=Glycyrrhiza echinata GN=HIDM PE=1 SV=1	51.5	1e-10
TRINITY_DN16047_c0_g2	sp|Q5NUF4|HIDM_GLYEC	HIDM	2-hydroxyisoflavanone dehydratase OS=Glycyrrhiza echinata GN=HIDM PE=1 SV=1	52.9	1e-79
TRINITY_DN16050_c0_g1	sp|Q3ZBH8|RS20_BOVIN	RPS20	40S ribosomal protein S20 OS=Bos taurus GN=RPS20 PE=3 SV=1	97.4	7.3e-58
TRINITY_DN16050_c0_g2	sp|Q3ZBH8|RS20_BOVIN	RPS20	40S ribosomal protein S20 OS=Bos taurus GN=RPS20 PE=3 SV=1	97.1	4.5e-51
TRINITY_DN16052_c0_g1	sp|Q8GWK6|NC104_ARATH	NAC104	NAC domain-containing protein 104 OS=Arabidopsis thaliana GN=NAC104 PE=2 SV=1	45.3	9.3e-23
TRINITY_DN16059_c0_g1	sp|P42225|STAT1_MOUSE	Stat1	Signal transducer and activator of transcription 1 OS=Mus musculus GN=Stat1 PE=1 SV=1	68	5e-21
TRINITY_DN16065_c0_g3	sp|Q9LZS6|SBT4F_ARATH	SBT4.15	Subtilisin-like protease SBT4.15 OS=Arabidopsis thaliana GN=SBT4.15 PE=3 SV=1	64.2	7.6e-18
TRINITY_DN16067_c0_g2	sp|Q9LFD5|BPA1_ARATH	BPA1	Binding partner of ACD11 1 OS=Arabidopsis thaliana GN=BPA1 PE=1 SV=1	53.8	2e-09
TRINITY_DN16072_c0_g1	sp|P48201|AT5G3_HUMAN	ATP5G3	ATP synthase F(0) complex subunit C3, mitochondrial OS=Homo sapiens GN=ATP5G3 PE=2 SV=1	63.2	5e-15
TRINITY_DN16073_c0_g4	sp|O19064|JAK2_PIG	JAK2	Tyrosine-protein kinase JAK2 OS=Sus scrofa GN=JAK2 PE=2 SV=1	82.4	3.7e-28
TRINITY_DN16073_c0_g6	sp|O60674|JAK2_HUMAN	JAK2	Tyrosine-protein kinase JAK2 OS=Homo sapiens GN=JAK2 PE=1 SV=2	69.2	2.3e-22
TRINITY_DN16073_c0_g9	sp|Q62120|JAK2_MOUSE	Jak2	Tyrosine-protein kinase JAK2 OS=Mus musculus GN=Jak2 PE=1 SV=2	61.4	2.2e-25
TRINITY_DN16076_c0_g2	sp|Q9SJG6|PP200_ARATH	PCMP-E75	Pentatricopeptide repeat-containing protein At2g42920, chloroplastic OS=Arabidopsis thaliana GN=PCMP-E75 PE=2 SV=1	58.6	5.6e-52
TRINITY_DN16085_c0_g1	sp|Q9SS03|DIR21_ARATH	DIR21	Dirigent protein 21 OS=Arabidopsis thaliana GN=DIR21 PE=3 SV=1	49.2	1.8e-41
TRINITY_DN16090_c0_g1	sp|Q5XK67|RPAC2_XENLA	polr1d	DNA-directed RNA polymerases I and III subunit RPAC2 OS=Xenopus laevis GN=polr1d PE=3 SV=1	42.9	4.1e-16
TRINITY_DN16092_c0_g1	sp|Q9ZU94|CRR12_ARATH	CRRSP12	Cysteine-rich repeat secretory protein 12 OS=Arabidopsis thaliana GN=CRRSP12 PE=1 SV=2	60.7	4.4e-49
TRINITY_DN16094_c0_g1	sp|P58372|RL30_ICTPU	rpl30	60S ribosomal protein L30 OS=Ictalurus punctatus GN=rpl30 PE=3 SV=2	96.6	1.1e-57
TRINITY_DN16096_c0_g1	sp|Q8GY31|CDC25_ARATH	CDC25	Dual specificity phosphatase Cdc25 OS=Arabidopsis thaliana GN=CDC25 PE=1 SV=1	71.4	2.2e-54
TRINITY_DN16099_c0_g1	sp|P41279|M3K8_HUMAN	MAP3K8	Mitogen-activated protein kinase kinase kinase 8 OS=Homo sapiens GN=MAP3K8 PE=1 SV=2	50.2	2e-46
TRINITY_DN16109_c0_g1	sp|P93711|CAMT_POPKI	-	Caffeoyl-CoA O-methyltransferase OS=Populus kitakamiensis PE=2 SV=1	62.1	4.3e-71
TRINITY_DN16110_c0_g1	sp|Q949X7|DCDA1_ARATH	LYSA1	Diaminopimelate decarboxylase 1, chloroplastic OS=Arabidopsis thaliana GN=LYSA1 PE=1 SV=1	88.9	1.9e-40
TRINITY_DN16114_c0_g1	sp|A0JN71|SASH3_BOVIN	SASH3	SAM and SH3 domain-containing protein 3 OS=Bos taurus GN=SASH3 PE=2 SV=2	54.9	1.1e-15
TRINITY_DN16117_c1_g1	sp|A7MB16|EIF3B_BOVIN	EIF3B	Eukaryotic translation initiation factor 3 subunit B OS=Bos taurus GN=EIF3B PE=2 SV=1	97	6.3e-33
TRINITY_DN16118_c0_g1	sp|Q08DK4|GHC1_BOVIN	SLC25A22	Mitochondrial glutamate carrier 1 OS=Bos taurus GN=SLC25A22 PE=2 SV=1	80.7	1.4e-19
TRINITY_DN16118_c0_g2	sp|Q08DK4|GHC1_BOVIN	SLC25A22	Mitochondrial glutamate carrier 1 OS=Bos taurus GN=SLC25A22 PE=2 SV=1	84.6	5.8e-13
TRINITY_DN16122_c0_g1	sp|Q9FGZ9|UBL5_ARATH	UBL5	Ubiquitin-like protein 5 OS=Arabidopsis thaliana GN=UBL5 PE=3 SV=1	97.3	2e-35
TRINITY_DN16126_c0_g1	sp|Q84L31|RD23C_ARATH	RAD23C	Ubiquitin receptor RAD23c OS=Arabidopsis thaliana GN=RAD23C PE=1 SV=2	88.4	4e-27
TRINITY_DN16127_c0_g1	sp|Q7SY24|KPCB_DANRE	prkcbb	Protein kinase C beta type OS=Danio rerio GN=prkcbb PE=2 SV=1	50.8	1.1e-06
TRINITY_DN16142_c0_g1	sp|Q9LME4|P2C09_ARATH	At1g22280	Probable protein phosphatase 2C 9 OS=Arabidopsis thaliana GN=At1g22280 PE=1 SV=1	80.6	3.6e-37
TRINITY_DN16147_c0_g1	sp|P49661|COPD3_ORYSJ	Os01g0833700	Coatomer subunit delta-3 OS=Oryza sativa subsp. japonica GN=Os01g0833700 PE=2 SV=2	43.2	1.7e-06
TRINITY_DN16154_c0_g1	sp|O48962|EBP_ARATH	At1g20050	Probable 3-beta-hydroxysteroid-Delta(8),Delta(7)-isomerase OS=Arabidopsis thaliana GN=At1g20050 PE=2 SV=1	70.4	8.9e-78
TRINITY_DN16164_c0_g1	sp|P06678|ZEAA_MAIZE	-	Zein-alpha 19D1 OS=Zea mays PE=2 SV=1	86.9	6.7e-40
TRINITY_DN16165_c0_g1	sp|Q9NYY3|PLK2_HUMAN	PLK2	Serine/threonine-protein kinase PLK2 OS=Homo sapiens GN=PLK2 PE=1 SV=3	70	1.4e-20
TRINITY_DN16165_c0_g2	sp|Q9H4B4|PLK3_HUMAN	PLK3	Serine/threonine-protein kinase PLK3 OS=Homo sapiens GN=PLK3 PE=1 SV=2	55.7	9.8e-28
TRINITY_DN16179_c0_g1	sp|Q6Q137|SEPT7_BOVIN	SEPT7	Septin-7 OS=Bos taurus GN=SEPT7 PE=2 SV=2	93.1	1.5e-42
TRINITY_DN16179_c0_g2	sp|Q6GLZ5|SEPT7_XENLA	sept7	Septin-7 OS=Xenopus laevis GN=sept7 PE=2 SV=1	92.1	1.9e-38
TRINITY_DN16180_c0_g1	sp|D4N502|DIOX3_PAPSO	CODM	Codeine O-demethylase OS=Papaver somniferum GN=CODM PE=1 SV=1	38.4	3.7e-55
TRINITY_DN16182_c0_g2	sp|Q9M2U2|TECR_ARATH	ECR	Very-long-chain enoyl-CoA reductase OS=Arabidopsis thaliana GN=ECR PE=1 SV=1	76.5	3.6e-140
TRINITY_DN16185_c0_g2	sp|Q94BT9|ATOX1_ARATH	ATX1	Copper transport protein ATX1 OS=Arabidopsis thaliana GN=ATX1 PE=1 SV=2	81.4	2.7e-27
TRINITY_DN16186_c0_g1	sp|P08980|UCRIA_SPIOL	petC	Cytochrome b6-f complex iron-sulfur subunit, chloroplastic OS=Spinacia oleracea GN=petC PE=1 SV=2	73.5	1.6e-91
TRINITY_DN16189_c0_g1	sp|I7C6E8|C7A52_PANGI	-	Beta-amyrin 28-oxidase OS=Panax ginseng PE=2 SV=1	50.2	1.7e-131
TRINITY_DN16198_c0_g3	sp|Q54NZ1|MEMO1_DICDI	memo1	Protein MEMO1 homolog OS=Dictyostelium discoideum GN=memo1 PE=3 SV=1	54.9	6.9e-17
TRINITY_DN16199_c0_g1	sp|P92980|APR3_ARATH	APR3	5'-adenylylsulfate reductase 3, chloroplastic OS=Arabidopsis thaliana GN=APR3 PE=2 SV=2	89.1	8.1e-58
TRINITY_DN16202_c0_g1	sp|Q9SF15|PUB24_ARATH	PUB24	E3 ubiquitin-protein ligase PUB24 OS=Arabidopsis thaliana GN=PUB24 PE=1 SV=1	36.4	1e-63
TRINITY_DN16205_c0_g1	sp|D7SFH9|LRL26_ARATH	LRK10L-2.6	Protein SUPPRESSOR OF NPR1-1 CONSTITUTIVE 4 OS=Arabidopsis thaliana GN=LRK10L-2.6 PE=1 SV=1	46.3	2e-12
TRINITY_DN16207_c0_g1	sp|Q9FRH3|CAP13_ARATH	At1g25240	Putative clathrin assembly protein At1g25240 OS=Arabidopsis thaliana GN=At1g25240 PE=3 SV=1	42.8	1.6e-79
TRINITY_DN16209_c0_g1	sp|P91791|PPIA_HEMPU	-	Peptidyl-prolyl cis-trans isomerase OS=Hemicentrotus pulcherrimus PE=2 SV=1	81.1	8.3e-78
TRINITY_DN16209_c0_g2	sp|P91791|PPIA_HEMPU	-	Peptidyl-prolyl cis-trans isomerase OS=Hemicentrotus pulcherrimus PE=2 SV=1	70.7	3e-10
TRINITY_DN16209_c0_g3	sp|P91791|PPIA_HEMPU	-	Peptidyl-prolyl cis-trans isomerase OS=Hemicentrotus pulcherrimus PE=2 SV=1	81.1	1.4e-75
TRINITY_DN16210_c0_g2	sp|A1L520|ARFG2_BOVIN	ARFGAP2	ADP-ribosylation factor GTPase-activating protein 2 OS=Bos taurus GN=ARFGAP2 PE=2 SV=1	76.8	1.6e-32
TRINITY_DN16210_c0_g3	sp|Q28CM8|ARFG2_XENTR	arfgap2	ADP-ribosylation factor GTPase-activating protein 2 OS=Xenopus tropicalis GN=arfgap2 PE=2 SV=1	63	6e-07
TRINITY_DN16211_c0_g1	sp|Q9FZH0|R35A2_ARATH	RPL35AB	60S ribosomal protein L35a-2 OS=Arabidopsis thaliana GN=RPL35AB PE=3 SV=1	82.9	1.9e-49
TRINITY_DN16215_c0_g1	sp|Q9FW44|ADR1_ARATH	ADR1	Disease resistance protein ADR1 OS=Arabidopsis thaliana GN=ADR1 PE=2 SV=2	31.9	1.5e-25
TRINITY_DN16216_c0_g1	sp|Q9SIM4|RL141_ARATH	RPL14A	60S ribosomal protein L14-1 OS=Arabidopsis thaliana GN=RPL14A PE=2 SV=1	83.6	3.3e-56
TRINITY_DN16216_c0_g2	sp|P55844|RL14_PEA	-	Probable 60S ribosomal protein L14 OS=Pisum sativum PE=2 SV=1	86	5.9e-42
TRINITY_DN16217_c0_g1	sp|O64948|LONP2_ARATH	LON2	Lon protease homolog 2, peroxisomal OS=Arabidopsis thaliana GN=LON2 PE=2 SV=1	82.8	5.9e-50
TRINITY_DN16217_c0_g4	sp|P93647|LONP2_MAIZE	LON1	Lon protease homolog 2, peroxisomal OS=Zea mays GN=LON1 PE=2 SV=1	88.2	9.1e-11
TRINITY_DN16219_c0_g1	sp|Q8JFG3|TNFA_SPAAU	tnf	Tumor necrosis factor OS=Sparus aurata GN=tnf PE=3 SV=1	39.1	1.7e-41
TRINITY_DN16222_c0_g1	sp|Q32PB9|RL38_BOVIN	RPL38	60S ribosomal protein L38 OS=Bos taurus GN=RPL38 PE=3 SV=4	100	6.5e-28
TRINITY_DN16225_c0_g1	sp|P18660|RLA1_CHICK	RPLP1	60S acidic ribosomal protein P1 OS=Gallus gallus GN=RPLP1 PE=3 SV=1	90.8	5.6e-28
TRINITY_DN16226_c0_g1	sp|Q864W1|CFAB_PONPY	CFB	Complement factor B OS=Pongo pygmaeus GN=CFB PE=3 SV=1	38.9	1.9e-157
TRINITY_DN16229_c0_g1	sp|O50017|PARP2_MAIZE	PARP2	Poly [ADP-ribose] polymerase 2 OS=Zea mays GN=PARP2 PE=2 SV=1	60.3	3.3e-218
TRINITY_DN16231_c0_g1	sp|Q9N0J9|CD81_SAGOE	CD81	CD81 protein OS=Saguinus oedipus GN=CD81 PE=2 SV=1	67.8	3.7e-85
TRINITY_DN16232_c0_g1	sp|Q9NXE8|CWC25_HUMAN	CWC25	Pre-mRNA-splicing factor CWC25 homolog OS=Homo sapiens GN=CWC25 PE=1 SV=1	33.1	9.5e-13
TRINITY_DN16235_c0_g1	sp|Q9LS10|MT810_ARATH	At5g38100	Probable S-adenosylmethionine-dependent methyltransferase At5g38100 OS=Arabidopsis thaliana GN=At5g38100 PE=2 SV=1	40.5	1.6e-58
TRINITY_DN16236_c0_g2	sp|Q27517|C13A3_CAEEL	cyp-13A3	Putative cytochrome P450 CYP13A3 OS=Caenorhabditis elegans GN=cyp-13A3 PE=3 SV=1	45.7	1.7e-12
TRINITY_DN16247_c0_g2	sp|Q8S9J6|ASPA_ARATH	At5g10770	Aspartyl protease family protein At5g10770 OS=Arabidopsis thaliana GN=At5g10770 PE=2 SV=1	22.2	6.9e-10
TRINITY_DN16251_c0_g1	sp|P53451|TCPD_TAKRU	cct4	T-complex protein 1 subunit delta OS=Takifugu rubripes GN=cct4 PE=2 SV=1	92	1.6e-32
TRINITY_DN16251_c0_g2	sp|Q7TPB1|TCPD_RAT	Cct4	T-complex protein 1 subunit delta OS=Rattus norvegicus GN=Cct4 PE=1 SV=3	91.6	2.4e-37
TRINITY_DN16254_c0_g2	sp|A2C031|RL7_PROM1	rplL	50S ribosomal protein L7/L12 OS=Prochlorococcus marinus (strain NATL1A) GN=rplL PE=3 SV=1	45.2	2.4e-12
TRINITY_DN16259_c0_g2	sp|P30956|RK28_TOBAC	RPL28	50S ribosomal protein L28, chloroplastic OS=Nicotiana tabacum GN=RPL28 PE=1 SV=1	68.8	4.7e-43
TRINITY_DN16260_c0_g1	sp|Q39227|SMT2_ARATH	SMT2	24-methylenesterol C-methyltransferase 2 OS=Arabidopsis thaliana GN=SMT2 PE=1 SV=2	89	1.9e-37
TRINITY_DN16260_c0_g2	sp|Q94JS4|SMT3B_ARATH	SMT3	24-methylenesterol C-methyltransferase 3 OS=Arabidopsis thaliana GN=SMT3 PE=2 SV=1	82.3	6.4e-45
TRINITY_DN16275_c0_g2	sp|Q03755|CUT1_CAEEL	cut-1	Cuticlin-1 OS=Caenorhabditis elegans GN=cut-1 PE=2 SV=2	94.7	4.8e-37
TRINITY_DN16282_c0_g2	sp|Q9LYB9|MBD4_ARATH	MBD4	Methyl-CpG-binding domain-containing protein 4 OS=Arabidopsis thaliana GN=MBD4 PE=2 SV=1	56.3	6e-42
TRINITY_DN16283_c1_g2	sp|O13035|SAP_CHICK	PSAP	Prosaposin OS=Gallus gallus GN=PSAP PE=1 SV=1	58.4	9.7e-29
TRINITY_DN16283_c1_g4	sp|O13035|SAP_CHICK	PSAP	Prosaposin OS=Gallus gallus GN=PSAP PE=1 SV=1	45.6	2.2e-13
TRINITY_DN16283_c1_g5	sp|O13035|SAP_CHICK	PSAP	Prosaposin OS=Gallus gallus GN=PSAP PE=1 SV=1	60.3	1.3e-18
TRINITY_DN16285_c0_g1	sp|Q9M2S7|FK201_ARATH	FKBP20-1	Peptidyl-prolyl cis-trans isomerase FKBP20-1 OS=Arabidopsis thaliana GN=FKBP20-1 PE=1 SV=1	75.5	1.5e-59
TRINITY_DN16291_c0_g1	sp|E2RKA8|RL32_CANLF	RPL32	60S ribosomal protein L32 OS=Canis lupus familiaris GN=RPL32 PE=1 SV=1	100	1.4e-70
TRINITY_DN16294_c0_g2	sp|P62938|PPIA_CHLAE	PPIA	Peptidyl-prolyl cis-trans isomerase A OS=Chlorocebus aethiops GN=PPIA PE=2 SV=2	100	8.6e-48
TRINITY_DN16294_c0_g3	sp|P10111|PPIA_RAT	Ppia	Peptidyl-prolyl cis-trans isomerase A OS=Rattus norvegicus GN=Ppia PE=1 SV=2	100	8.9e-43
TRINITY_DN16301_c0_g4	sp|Q9Y5W3|KLF2_HUMAN	KLF2	Krueppel-like factor 2 OS=Homo sapiens GN=KLF2 PE=1 SV=2	88.1	3.9e-16
TRINITY_DN16311_c0_g1	sp|Q5RB37|ITIH3_PONAB	ITIH3	Inter-alpha-trypsin inhibitor heavy chain H3 OS=Pongo abelii GN=ITIH3 PE=2 SV=1	45.5	3.7e-44
TRINITY_DN16311_c0_g2	sp|Q06033|ITIH3_HUMAN	ITIH3	Inter-alpha-trypsin inhibitor heavy chain H3 OS=Homo sapiens GN=ITIH3 PE=1 SV=2	54.5	1.9e-15
TRINITY_DN16313_c0_g2	sp|P08226|APOE_MOUSE	Apoe	Apolipoprotein E OS=Mus musculus GN=Apoe PE=1 SV=2	100	1.4e-52
TRINITY_DN16320_c1_g1	sp|P06909|CFAH_MOUSE	Cfh	Complement factor H OS=Mus musculus GN=Cfh PE=1 SV=2	37	2.6e-20
TRINITY_DN16324_c0_g2	sp|Q24702|DVA1_DICVI	DVA-1	DVA-1 polyprotein OS=Dictyocaulus viviparus GN=DVA-1 PE=1 SV=1	46.6	3.9e-11
TRINITY_DN16325_c0_g1	sp|Q0VCX5|ERF1_BOVIN	ETF1	Eukaryotic peptide chain release factor subunit 1 OS=Bos taurus GN=ETF1 PE=2 SV=3	94.1	4.9e-38
TRINITY_DN16326_c0_g1	sp|Q9SMW7|BTF3_ARATH	BTF3	Basic transcription factor 3 OS=Arabidopsis thaliana GN=BTF3 PE=1 SV=1	91.2	9.6e-29
TRINITY_DN16334_c0_g1	sp|Q9HBH9|MKNK2_HUMAN	MKNK2	MAP kinase-interacting serine/threonine-protein kinase 2 OS=Homo sapiens GN=MKNK2 PE=1 SV=3	81.2	8.1e-35
TRINITY_DN16339_c1_g1	sp|P27484|GRP2_NICSY	GRP-2	Glycine-rich protein 2 OS=Nicotiana sylvestris GN=GRP-2 PE=2 SV=1	77.3	3.4e-27
TRINITY_DN16344_c0_g4	sp|Q14974|IMB1_HUMAN	KPNB1	Importin subunit beta-1 OS=Homo sapiens GN=KPNB1 PE=1 SV=2	88.6	1.8e-30
TRINITY_DN16345_c0_g1	sp|O43566|RGS14_HUMAN	RGS14	Regulator of G-protein signaling 14 OS=Homo sapiens GN=RGS14 PE=1 SV=4	50	2.4e-10
TRINITY_DN16347_c0_g2	sp|P31656|CADH_MEDSA	CAD2	Probable cinnamyl alcohol dehydrogenase OS=Medicago sativa GN=CAD2 PE=1 SV=1	84.8	5.8e-45
TRINITY_DN16349_c0_g1	sp|P33490|ABP1_TOBAC	T85	Auxin-binding protein T85 OS=Nicotiana tabacum GN=T85 PE=3 SV=1	75	3.2e-81
TRINITY_DN16350_c0_g1	sp|F4HSX9|KLCR3_ARATH	KLCR3	Protein KINESIN LIGHT CHAIN-RELATED 3 OS=Arabidopsis thaliana GN=KLCR3 PE=2 SV=1	59.1	8.4e-30
TRINITY_DN16358_c0_g1	sp|P23472|CHLY_HEVBR	-	Hevamine-A OS=Hevea brasiliensis PE=1 SV=2	56	1.8e-91
TRINITY_DN16362_c0_g1	sp|Q08047|GLGB_MAIZE	SBE1	1,4-alpha-glucan-branching enzyme 2, chloroplastic/amyloplastic OS=Zea mays GN=SBE1 PE=1 SV=1	90.3	2e-190
TRINITY_DN16365_c0_g1	sp|Q9W720|UCP2_DANRE	ucp2	Mitochondrial uncoupling protein 2 OS=Danio rerio GN=ucp2 PE=2 SV=1	78.9	4.2e-17
TRINITY_DN16371_c0_g1	sp|Q9WUT7|CCR9_MOUSE	Ccr9	C-C chemokine receptor type 9 OS=Mus musculus GN=Ccr9 PE=2 SV=1	43.6	8.9e-83
TRINITY_DN16375_c0_g2	sp|O94489|EF3_SCHPO	tef3	Elongation factor 3 OS=Schizosaccharomyces pombe (strain 972 / ATCC 24843) GN=tef3 PE=1 SV=1	56.1	8.4e-31
TRINITY_DN16375_c0_g3	sp|O94489|EF3_SCHPO	tef3	Elongation factor 3 OS=Schizosaccharomyces pombe (strain 972 / ATCC 24843) GN=tef3 PE=1 SV=1	57.6	6.8e-47
TRINITY_DN16382_c0_g1	sp|Q9FKK7|XYLA_ARATH	XYLA	Xylose isomerase OS=Arabidopsis thaliana GN=XYLA PE=2 SV=2	79.1	8.5e-130
TRINITY_DN16385_c0_g1	sp|Q0A805|CCME_ALKEH	ccmE	Cytochrome c-type biogenesis protein CcmE OS=Alkalilimnicola ehrlichii (strain ATCC BAA-1101 / DSM 17681 / MLHE-1) GN=ccmE PE=3 SV=1	39.7	2e-20
TRINITY_DN16387_c0_g1	sp|O05668|Y1370_MYCLE	ML1370	Uncharacterized RNA pseudouridine synthase ML1370 OS=Mycobacterium leprae (strain TN) GN=ML1370 PE=3 SV=1	38.3	3.9e-30
TRINITY_DN16392_c0_g2	sp|O65583|UKL4_ARATH	UKL4	Uridine kinase-like protein 4 OS=Arabidopsis thaliana GN=UKL4 PE=2 SV=2	42.1	3.6e-15
TRINITY_DN16393_c0_g1	sp|Q7FB56|AB15C_ARATH	ABCC15	Putative ABC transporter C family member 15 OS=Arabidopsis thaliana GN=ABCC15 PE=5 SV=2	83.1	6.6e-24
TRINITY_DN16394_c1_g1	sp|Q7M443|CHIT2_TULBA	-	Chitinase 2 OS=Tulipa bakeri PE=1 SV=1	70.7	1.1e-111
TRINITY_DN16395_c0_g1	sp|Q9C5H9|GACP2_ARATH	GCP2	Gamma-tubulin complex component 2 OS=Arabidopsis thaliana GN=GCP2 PE=1 SV=1	46.3	6.3e-09
TRINITY_DN16396_c0_g3	sp|Q9M2S6|SDIR1_ARATH	SDIR1	E3 ubiquitin-protein ligase SDIR1 OS=Arabidopsis thaliana GN=SDIR1 PE=1 SV=1	44.3	2.5e-09
TRINITY_DN16398_c0_g1	sp|Q9FXG8|BLH10_ARATH	BLH10	BEL1-like homeodomain protein 10 OS=Arabidopsis thaliana GN=BLH10 PE=1 SV=1	54.8	4e-67
TRINITY_DN163_c0_g1	sp|Q10MX1|P2C32_ORYSJ	Os03g0292100	Probable protein phosphatase 2C 32 OS=Oryza sativa subsp. japonica GN=Os03g0292100 PE=2 SV=1	97.8	2.4e-16
TRINITY_DN16403_c0_g1	sp|P27684|PSRP5_SPIOL	PSRP5	50S ribosomal protein 5 alpha, chloroplastic OS=Spinacia oleracea GN=PSRP5 PE=1 SV=1	48.4	5.6e-06
TRINITY_DN16407_c0_g2	sp|Q90XG0|TPISB_DANRE	tpi1b	Triosephosphate isomerase B OS=Danio rerio GN=tpi1b PE=2 SV=1	99.3	4e-74
TRINITY_DN16408_c0_g2	sp|Q56JX8|RS13_BOVIN	RPS13	40S ribosomal protein S13 OS=Bos taurus GN=RPS13 PE=2 SV=3	100	6e-73
TRINITY_DN16410_c0_g3	sp|Q64537|CPNS1_RAT	Capns1	Calpain small subunit 1 OS=Rattus norvegicus GN=Capns1 PE=1 SV=3	78.9	2.6e-37
TRINITY_DN16420_c0_g1	sp|Q9T0I8|MTN1_ARATH	MTN1	5'-methylthioadenosine/S-adenosylhomocysteine nucleosidase 1 OS=Arabidopsis thaliana GN=MTN1 PE=1 SV=1	72.1	1.9e-99
TRINITY_DN16421_c0_g1	sp|Q06106|MRD1_YEAST	MRD1	Multiple RNA-binding domain-containing protein 1 OS=Saccharomyces cerevisiae (strain ATCC 204508 / S288c) GN=MRD1 PE=1 SV=1	38.2	7.9e-71
TRINITY_DN16427_c0_g1	sp|Q6EU49|WNK4_ORYSJ	WNK4	Probable serine/threonine-protein kinase WNK4 OS=Oryza sativa subsp. japonica GN=WNK4 PE=2 SV=1	47.3	3.3e-99
TRINITY_DN16432_c0_g1	sp|Q8RY65|NIK2_ARATH	NIK2	Protein NSP-INTERACTING KINASE 2 OS=Arabidopsis thaliana GN=NIK2 PE=1 SV=1	70.6	3e-51
TRINITY_DN16436_c0_g1	sp|Q9FFY3|VAS_ARATH	VAS	Lipid transfer-like protein VAS OS=Arabidopsis thaliana GN=VAS PE=2 SV=1	55.2	1.1e-28
TRINITY_DN16438_c0_g4	sp|P21569|CYPH_MAIZE	CYP	Peptidyl-prolyl cis-trans isomerase OS=Zea mays GN=CYP PE=2 SV=1	86.6	3.7e-85
TRINITY_DN16440_c0_g2	sp|Q6PBI5|RS25_DANRE	rps25	40S ribosomal protein S25 OS=Danio rerio GN=rps25 PE=2 SV=1	95.5	4.3e-50
TRINITY_DN16440_c0_g3	sp|Q6PBI5|RS25_DANRE	rps25	40S ribosomal protein S25 OS=Danio rerio GN=rps25 PE=2 SV=1	96.8	2.5e-58
TRINITY_DN16445_c0_g2	sp|P10978|POLX_TOBAC	-	Retrovirus-related Pol polyprotein from transposon TNT 1-94 OS=Nicotiana tabacum PE=2 SV=1	47.2	1.1e-16
TRINITY_DN16449_c0_g1	sp|Q19714|TMCO1_CAEEL	F22B5.10	Calcium load-activated calcium channel homolog OS=Caenorhabditis elegans GN=F22B5.10 PE=3 SV=1	45.8	3e-34
TRINITY_DN16453_c0_g2	sp|Q9LMX5|AFP2_ARATH	AFP2	Ninja-family protein AFP2 OS=Arabidopsis thaliana GN=AFP2 PE=1 SV=1	39.4	1.9e-42
TRINITY_DN16455_c0_g1	sp|Q3MHR5|SRSF2_BOVIN	SRSF2	Serine/arginine-rich splicing factor 2 OS=Bos taurus GN=SRSF2 PE=2 SV=3	98.4	2.4e-31
TRINITY_DN16458_c0_g1	sp|Q2V9B0|MY1R1_SOLTU	-	Transcription factor MYB1R1 OS=Solanum tuberosum PE=2 SV=1	80.3	8.8e-26
TRINITY_DN16460_c0_g1	sp|Q6AUQ7|DRM3_ORYSJ	DRM3	Probable inactive DNA (cytosine-5)-methyltransferase DRM3 OS=Oryza sativa subsp. japonica GN=DRM3 PE=2 SV=1	38.2	7.7e-123
TRINITY_DN16467_c1_g2	sp|Q6DBG8|ARAD1_ARATH	ARAD1	Probable arabinosyltransferase ARAD1 OS=Arabidopsis thaliana GN=ARAD1 PE=1 SV=1	44.6	2.3e-37
TRINITY_DN16467_c1_g5	sp|Q9LF61|XPT_ARATH	XPT	Xylulose 5-phosphate/phosphate translocator, chloroplastic OS=Arabidopsis thaliana GN=XPT PE=1 SV=1	86.6	1.1e-49
TRINITY_DN16468_c0_g1	sp|Q2VB19|PUM1_CHICK	PUM1	Pumilio homolog 1 OS=Gallus gallus GN=PUM1 PE=2 SV=1	91.4	7.5e-12
TRINITY_DN16471_c0_g1	sp|Q0J035|PANK2_ORYSJ	Os09g0533100	Pantothenate kinase 2 OS=Oryza sativa subsp. japonica GN=Os09g0533100 PE=2 SV=2	83	2.2e-15
TRINITY_DN16476_c0_g2	sp|Q27371|TNNT_CAEEL	mup-2	Troponin T OS=Caenorhabditis elegans GN=mup-2 PE=2 SV=1	56.2	7.8e-15
TRINITY_DN16477_c0_g2	sp|Q9SDY5|RCE1_ARATH	RCE1	NEDD8-conjugating enzyme Ubc12 OS=Arabidopsis thaliana GN=RCE1 PE=1 SV=1	93.8	2.9e-40
TRINITY_DN16478_c0_g1	sp|P61284|RL12_BOVIN	RPL12	60S ribosomal protein L12 OS=Bos taurus GN=RPL12 PE=2 SV=1	89	6.5e-81
TRINITY_DN16478_c0_g2	sp|P61284|RL12_BOVIN	RPL12	60S ribosomal protein L12 OS=Bos taurus GN=RPL12 PE=2 SV=1	100	1.1e-90
TRINITY_DN16479_c0_g1	sp|Q9M1J1|FIS1A_ARATH	FIS1A	Mitochondrial fission 1 protein A OS=Arabidopsis thaliana GN=FIS1A PE=1 SV=1	62.5	2.8e-39
TRINITY_DN16486_c0_g1	sp|Q5D018|RBM8A_DANRE	rbm8a	RNA-binding protein 8A OS=Danio rerio GN=rbm8a PE=2 SV=1	97.8	5.6e-45
TRINITY_DN16493_c0_g1	sp|O80507|CSK2E_ARATH	CKB4	Putative casein kinase II subunit beta-4 OS=Arabidopsis thaliana GN=CKB4 PE=1 SV=1	69.8	2.2e-75
TRINITY_DN16494_c0_g4	sp|Q9M2F9|RH52_ARATH	RH52	DEAD-box ATP-dependent RNA helicase 52 OS=Arabidopsis thaliana GN=RH52 PE=1 SV=1	82.7	2.4e-79
TRINITY_DN16495_c0_g1	sp|Q90YT1|RL37_ICTPU	rpl37	60S ribosomal protein L37 OS=Ictalurus punctatus GN=rpl37 PE=3 SV=3	97.9	7.4e-49
TRINITY_DN16495_c0_g2	sp|P79244|RL37_BOVIN	RPL37	60S ribosomal protein L37 OS=Bos taurus GN=RPL37 PE=3 SV=4	100	4.1e-49
TRINITY_DN16501_c0_g1	sp|O65359|SYP41_ARATH	SYP41	Syntaxin-41 OS=Arabidopsis thaliana GN=SYP41 PE=1 SV=1	76.2	2.9e-126
TRINITY_DN16505_c0_g1	sp|Q55BK0|UFD1_DICDI	ufd1	Ubiquitin fusion degradation protein 1 homolog OS=Dictyostelium discoideum GN=ufd1 PE=3 SV=1	57.6	6.1e-61
TRINITY_DN16508_c0_g2	sp|P24806|XTH24_ARATH	XTH24	Xyloglucan endotransglucosylase/hydrolase protein 24 OS=Arabidopsis thaliana GN=XTH24 PE=1 SV=2	78.6	4.8e-49
TRINITY_DN16508_c0_g4	sp|Q8LDW9|XTH9_ARATH	XTH9	Xyloglucan endotransglucosylase/hydrolase protein 9 OS=Arabidopsis thaliana GN=XTH9 PE=2 SV=2	66.7	6.1e-09
TRINITY_DN16509_c0_g1	sp|Q41495|ST14_SOLTU	STS14	STS14 protein OS=Solanum tuberosum GN=STS14 PE=2 SV=1	71.7	6e-59
TRINITY_DN16513_c0_g1	sp|Q8LPN7|RNG1L_ARATH	At3g19950	E3 ubiquitin-protein ligase RING1-like OS=Arabidopsis thaliana GN=At3g19950 PE=1 SV=1	49.6	3.2e-73
TRINITY_DN16515_c0_g1	sp|P27396|HSP11_DAUCA	-	17.8 kDa class I heat shock protein OS=Daucus carota PE=3 SV=1	76.1	1e-62
TRINITY_DN16518_c0_g1	sp|Q90YQ1|RS23_ICTPU	rps23	40S ribosomal protein S23 OS=Ictalurus punctatus GN=rps23 PE=2 SV=1	99.3	8.5e-72
TRINITY_DN16524_c0_g2	sp|Q42290|MPPB_ARATH	At3g02090	Probable mitochondrial-processing peptidase subunit beta, mitochondrial OS=Arabidopsis thaliana GN=At3g02090 PE=1 SV=2	92.8	6.8e-30
TRINITY_DN16531_c0_g1	sp|P61485|RL36A_DANRE	rpl36a	60S ribosomal protein L36a OS=Danio rerio GN=rpl36a PE=3 SV=2	100	1.4e-52
TRINITY_DN16531_c0_g2	sp|Q969Q0|RL36L_HUMAN	RPL36AL	60S ribosomal protein L36a-like OS=Homo sapiens GN=RPL36AL PE=1 SV=3	100	1.9e-56
TRINITY_DN16532_c0_g1	sp|Q9SRS3|YMG11_ARATH	YLMG1-1	YlmG homolog protein 1-1, chloroplastic OS=Arabidopsis thaliana GN=YLMG1-1 PE=2 SV=1	79.8	5.1e-42
TRINITY_DN16534_c0_g1	sp|P28799|GRN_HUMAN	GRN	Granulins OS=Homo sapiens GN=GRN PE=1 SV=2	55.6	7.9e-21
TRINITY_DN16535_c0_g1	sp|Q9SZ83|Y4967_ARATH	At4g09670	Uncharacterized oxidoreductase At4g09670 OS=Arabidopsis thaliana GN=At4g09670 PE=1 SV=1	56.1	9.6e-105
TRINITY_DN16537_c0_g1	sp|Q90X67|SOCS3_CHICK	SOCS3	Suppressor of cytokine signaling 3 OS=Gallus gallus GN=SOCS3 PE=2 SV=1	60.7	2.4e-68
TRINITY_DN16538_c0_g1	sp|Q5Z627|EF1G3_ORYSJ	Os06g0571400	Elongation factor 1-gamma 3 OS=Oryza sativa subsp. japonica GN=Os06g0571400 PE=2 SV=1	99.8	1.1e-220
TRINITY_DN16541_c0_g1	sp|Q9LD47|CCS_ARATH	CCS	Copper chaperone for superoxide dismutase, chloroplastic/cytosolic OS=Arabidopsis thaliana GN=CCS PE=1 SV=1	74.2	4.6e-32
TRINITY_DN16542_c0_g2	sp|P57780|ACTN4_MOUSE	Actn4	Alpha-actinin-4 OS=Mus musculus GN=Actn4 PE=1 SV=1	79.1	6.2e-33
TRINITY_DN16542_c0_g3	sp|Q3B7N2|ACTN1_BOVIN	ACTN1	Alpha-actinin-1 OS=Bos taurus GN=ACTN1 PE=2 SV=1	75.4	1.4e-18
TRINITY_DN16542_c0_g5	sp|P20111|ACTN2_CHICK	ACTN2	Alpha-actinin-2 OS=Gallus gallus GN=ACTN2 PE=2 SV=1	81.3	7.4e-30
TRINITY_DN16544_c0_g2	sp|Q4VCM1|LCAT2_ARATH	PSAT	Phospholipid--sterol O-acyltransferase OS=Arabidopsis thaliana GN=PSAT PE=2 SV=2	78.1	7.4e-50
TRINITY_DN16548_c0_g1	sp|O82530|PSA4_PETHY	PAC1	Proteasome subunit alpha type-4 OS=Petunia hybrida GN=PAC1 PE=2 SV=1	92.4	1.8e-126
TRINITY_DN16552_c0_g3	sp|P39428|TRAF1_MOUSE	Traf1	TNF receptor-associated factor 1 OS=Mus musculus GN=Traf1 PE=1 SV=2	77.6	2.5e-21
TRINITY_DN16557_c0_g2	sp|P45856|HBD_BACSU	mmgB	Probable 3-hydroxybutyryl-CoA dehydrogenase OS=Bacillus subtilis (strain 168) GN=mmgB PE=2 SV=1	63.1	4.8e-50
TRINITY_DN16558_c0_g1	sp|A8WRP9|MTNB_CAEBR	CBG01968	Probable methylthioribulose-1-phosphate dehydratase OS=Caenorhabditis briggsae GN=CBG01968 PE=3 SV=2	55.4	6.4e-11
TRINITY_DN16561_c0_g1	sp|Q9SNB6|RDUF1_ARATH	RDUF1	E3 ubiquitin-protein ligase RDUF1 OS=Arabidopsis thaliana GN=RDUF1 PE=1 SV=1	45.2	5.4e-18
TRINITY_DN16570_c0_g1	sp|Q9LHP2|SL30A_ARATH	SCL30A	Serine/arginine-rich SC35-like splicing factor SCL30A OS=Arabidopsis thaliana GN=SCL30A PE=1 SV=1	54.1	1.8e-17
TRINITY_DN16575_c0_g1	sp|Q862I1|RL24_BOVIN	RPL24	60S ribosomal protein L24 OS=Bos taurus GN=RPL24 PE=2 SV=2	100	1.9e-62
TRINITY_DN16575_c0_g2	sp|Q8JGR4|RL24_DANRE	rpl24	60S ribosomal protein L24 OS=Danio rerio GN=rpl24 PE=2 SV=1	99	1.1e-52
TRINITY_DN16575_c0_g3	sp|Q8JGR4|RL24_DANRE	rpl24	60S ribosomal protein L24 OS=Danio rerio GN=rpl24 PE=2 SV=1	97.1	1.8e-51
TRINITY_DN16578_c0_g3	sp|P18279|TCPA_CRIGR	TCP1	T-complex protein 1 subunit alpha OS=Cricetulus griseus GN=TCP1 PE=2 SV=1	96.1	2.1e-35
TRINITY_DN16578_c0_g4	sp|Q9XT06|TCPA_MONDO	TCP1	T-complex protein 1 subunit alpha OS=Monodelphis domestica GN=TCP1 PE=2 SV=1	92.7	2.9e-35
TRINITY_DN16579_c0_g1	sp|O42197|B2MG_ICTPU	b2m	Beta-2-microglobulin OS=Ictalurus punctatus GN=b2m PE=3 SV=1	65.2	1.7e-40
TRINITY_DN16583_c1_g1	sp|P27061|PPA1_SOLLC	APS1	Acid phosphatase 1 OS=Solanum lycopersicum GN=APS1 PE=2 SV=1	50.8	1.2e-66
TRINITY_DN16587_c0_g1	sp|Q9LD55|EIF3A_ARATH	TIF3A1	Eukaryotic translation initiation factor 3 subunit A OS=Arabidopsis thaliana GN=TIF3A1 PE=1 SV=1	82.1	7e-37
TRINITY_DN16590_c0_g1	sp|Q9M0I2|EXPB3_ARATH	EXPB3	Expansin-B3 OS=Arabidopsis thaliana GN=EXPB3 PE=2 SV=2	73.5	4.9e-112
TRINITY_DN16591_c0_g14	sp|P02457|CO1A1_CHICK	COL1A1	Collagen alpha-1(I) chain OS=Gallus gallus GN=COL1A1 PE=1 SV=3	83.8	1.8e-135
TRINITY_DN16591_c0_g3	sp|P02457|CO1A1_CHICK	COL1A1	Collagen alpha-1(I) chain OS=Gallus gallus GN=COL1A1 PE=1 SV=3	73.9	1.4e-36
TRINITY_DN16592_c0_g1	sp|Q9CR47|NSA2_MOUSE	Nsa2	Ribosome biogenesis protein NSA2 homolog OS=Mus musculus GN=Nsa2 PE=2 SV=1	79.4	8.6e-32
TRINITY_DN16597_c0_g2	sp|Q9C5Z3|EIF3E_ARATH	TIF3E1	Eukaryotic translation initiation factor 3 subunit E OS=Arabidopsis thaliana GN=TIF3E1 PE=1 SV=1	88.9	2.6e-32
TRINITY_DN16600_c0_g2	sp|Q9LIR4|ILVD_ARATH	DHAD	Dihydroxy-acid dehydratase, chloroplastic OS=Arabidopsis thaliana GN=DHAD PE=1 SV=1	83.6	2.5e-52
TRINITY_DN16600_c0_g3	sp|Q9LIR4|ILVD_ARATH	DHAD	Dihydroxy-acid dehydratase, chloroplastic OS=Arabidopsis thaliana GN=DHAD PE=1 SV=1	80.4	3.9e-223
TRINITY_DN16604_c0_g1	sp|Q32L53|LFG1_BOVIN	GRINA	Protein lifeguard 1 OS=Bos taurus GN=GRINA PE=2 SV=1	54.6	1.6e-53
TRINITY_DN16606_c0_g2	sp|Q9FPW6|POB1_ARATH	POB1	BTB/POZ domain-containing protein POB1 OS=Arabidopsis thaliana GN=POB1 PE=2 SV=2	88.5	4.2e-75
TRINITY_DN16607_c0_g1	sp|Q0JG75|PSB28_ORYSJ	PSB28	Photosystem II reaction center PSB28 protein, chloroplastic OS=Oryza sativa subsp. japonica GN=PSB28 PE=2 SV=2	61.6	5.1e-55
TRINITY_DN16609_c1_g1	sp|Q8L831|NUDT3_ARATH	NUDT3	Nudix hydrolase 3 OS=Arabidopsis thaliana GN=NUDT3 PE=1 SV=1	74.6	1e-55
TRINITY_DN16612_c0_g1	sp|P15170|ERF3A_HUMAN	GSPT1	Eukaryotic peptide chain release factor GTP-binding subunit ERF3A OS=Homo sapiens GN=GSPT1 PE=1 SV=1	90	3.3e-32
TRINITY_DN16614_c0_g1	sp|Q9LN22|PPR54_ARATH	At1g20300	Pentatricopeptide repeat-containing protein At1g20300, mitochondrial OS=Arabidopsis thaliana GN=At1g20300 PE=2 SV=1	72.1	9e-11
TRINITY_DN16614_c0_g2	sp|Q9LN22|PPR54_ARATH	At1g20300	Pentatricopeptide repeat-containing protein At1g20300, mitochondrial OS=Arabidopsis thaliana GN=At1g20300 PE=2 SV=1	49.1	6.3e-43
TRINITY_DN16619_c0_g1	sp|F4K6F1|GT18_ARATH	XLT2	Xyloglucan galactosyltransferase XLT2 OS=Arabidopsis thaliana GN=XLT2 PE=1 SV=1	68.6	7.7e-178
TRINITY_DN16622_c0_g1	sp|Q67YC9|Y4141_ARATH	At4g14100	Uncharacterized protein At4g14100 OS=Arabidopsis thaliana GN=At4g14100 PE=2 SV=1	64.9	1.5e-61
TRINITY_DN16625_c0_g1	sp|Q90YT2|RL36_ICTPU	rpl36	60S ribosomal protein L36 OS=Ictalurus punctatus GN=rpl36 PE=3 SV=1	94.2	1e-46
TRINITY_DN16625_c0_g2	sp|Q9Y3U8|RL36_HUMAN	RPL36	60S ribosomal protein L36 OS=Homo sapiens GN=RPL36 PE=1 SV=3	100	2.5e-51
TRINITY_DN16625_c0_g3	sp|Q6Q415|RL36_DANRE	rpl36	60S ribosomal protein L36 OS=Danio rerio GN=rpl36 PE=3 SV=1	100	2.6e-46
TRINITY_DN16626_c0_g1	sp|P40978|RS19_ORYSJ	RPS19A	40S ribosomal protein S19 OS=Oryza sativa subsp. japonica GN=RPS19A PE=2 SV=1	99.3	1.8e-80
TRINITY_DN16628_c0_g3	sp|P67827|KC1A_BOVIN	CSNK1A1	Casein kinase I isoform alpha OS=Bos taurus GN=CSNK1A1 PE=1 SV=1	100	8e-23
TRINITY_DN16631_c0_g1	sp|O82204|RL281_ARATH	RPL28A	60S ribosomal protein L28-1 OS=Arabidopsis thaliana GN=RPL28A PE=1 SV=1	72	4.7e-50
TRINITY_DN16637_c0_g1	sp|Q9M4T8|PSA5_SOYBN	PAE1	Proteasome subunit alpha type-5 OS=Glycine max GN=PAE1 PE=2 SV=1	98.6	1.6e-37
TRINITY_DN16638_c2_g1	sp|Q9FI66|DIR3_ARATH	DIR3	Dirigent protein 3 OS=Arabidopsis thaliana GN=DIR3 PE=3 SV=1	43.7	1.5e-41
TRINITY_DN16642_c0_g1	sp|Q7Y0F2|NRX12_ORYSJ	Os03g0405900	Probable nucleoredoxin 1-2 OS=Oryza sativa subsp. japonica GN=Os03g0405900 PE=2 SV=1	29.5	4.6e-18
TRINITY_DN16643_c0_g1	sp|Q9LZ06|GSTL3_ARATH	GSTL3	Glutathione S-transferase L3 OS=Arabidopsis thaliana GN=GSTL3 PE=2 SV=1	65.4	2.8e-88
TRINITY_DN16647_c0_g1	sp|O04379|AGO1_ARATH	AGO1	Protein argonaute 1 OS=Arabidopsis thaliana GN=AGO1 PE=1 SV=1	75.7	1.2e-20
TRINITY_DN16650_c0_g4	sp|Q8GU95|GSH1A_ORYSI	GSH1-1	Glutamate--cysteine ligase A, chloroplastic OS=Oryza sativa subsp. indica GN=GSH1-1 PE=2 SV=2	100	4.9e-16
TRINITY_DN16653_c0_g2	sp|P40267|H1_SOLPN	-	Histone H1 OS=Solanum pennellii PE=2 SV=1	61.3	3e-28
TRINITY_DN16657_c0_g1	sp|Q90YT3|RL35A_ICTPU	rpl35a	60S ribosomal protein L35a OS=Ictalurus punctatus GN=rpl35a PE=3 SV=1	90.9	1.4e-48
TRINITY_DN16657_c0_g2	sp|Q90YT3|RL35A_ICTPU	rpl35a	60S ribosomal protein L35a OS=Ictalurus punctatus GN=rpl35a PE=3 SV=1	91.9	1e-48
TRINITY_DN16665_c0_g1	sp|O57521|HS90B_DANRE	hsp90ab1	Heat shock protein HSP 90-beta OS=Danio rerio GN=hsp90ab1 PE=1 SV=2	97.4	7.8e-35
TRINITY_DN16668_c0_g2	sp|Q9LPR8|SCL3_ARATH	SCL3	Scarecrow-like protein 3 OS=Arabidopsis thaliana GN=SCL3 PE=2 SV=1	66.7	1.2e-176
TRINITY_DN16670_c0_g1	sp|P93030|RMA2_ARATH	RMA2	E3 ubiquitin-protein ligase RMA2 OS=Arabidopsis thaliana GN=RMA2 PE=1 SV=1	34.4	4.4e-17
TRINITY_DN16672_c0_g1	sp|Q9LTS6|RS16B_ARATH	RPS16-2	30S ribosomal protein S16-2, chloroplastic/mitochondrial OS=Arabidopsis thaliana GN=RPS16-2 PE=2 SV=1	82	7.3e-55
TRINITY_DN16675_c0_g1	sp|P04794|HSP14_SOYBN	HSP17.5-E	17.5 kDa class I heat shock protein OS=Glycine max GN=HSP17.5-E PE=3 SV=1	100	3.4e-34
TRINITY_DN16680_c0_g1	sp|A2Y5T7|SNAT1_ORYSI	SNAT1	Serotonin N-acetyltransferase 1, chloroplastic OS=Oryza sativa subsp. indica GN=SNAT1 PE=3 SV=3	66.7	4.4e-27
TRINITY_DN16680_c0_g2	sp|Q7X9V3|NSI_ARATH	NSI	Acetyltransferase NSI OS=Arabidopsis thaliana GN=NSI PE=1 SV=1	90.6	1.3e-41
TRINITY_DN16684_c0_g2	sp|Q84W65|SUFE1_ARATH	SUFE1	SufE-like protein 1, chloroplastic/mitochondrial OS=Arabidopsis thaliana GN=SUFE1 PE=1 SV=2	65.8	4.2e-104
TRINITY_DN16685_c0_g1	sp|O49453|Y4844_ARATH	At4g28440	Uncharacterized protein At4g28440 OS=Arabidopsis thaliana GN=At4g28440 PE=1 SV=1	74.1	3.3e-19
TRINITY_DN16687_c0_g1	sp|P14628|IL1B_RABIT	IL1B	Interleukin-1 beta OS=Oryctolagus cuniculus GN=IL1B PE=2 SV=1	29.4	1e-11
TRINITY_DN16690_c0_g1	sp|Q0WVV0|PPR31_ARATH	At1g10910	Pentatricopeptide repeat-containing protein At1g10910, chloroplastic OS=Arabidopsis thaliana GN=At1g10910 PE=2 SV=1	71.9	1.1e-76
TRINITY_DN16695_c1_g1	sp|Q9SW18|CHLM_ARATH	CHLM	Magnesium protoporphyrin IX methyltransferase, chloroplastic OS=Arabidopsis thaliana GN=CHLM PE=1 SV=1	66.1	1.3e-96
TRINITY_DN16698_c0_g1	sp|Q9LDG2|TBL10_ARATH	TBL10	Protein trichome birefringence-like 10 OS=Arabidopsis thaliana GN=TBL10 PE=2 SV=1	50	8.8e-06
TRINITY_DN16699_c0_g1	sp|Q9LTR9|NMT1_ARATH	NMT1	Glycylpeptide N-tetradecanoyltransferase 1 OS=Arabidopsis thaliana GN=NMT1 PE=1 SV=2	78.2	9.6e-205
TRINITY_DN16700_c0_g1	sp|P45591|COF2_MOUSE	Cfl2	Cofilin-2 OS=Mus musculus GN=Cfl2 PE=1 SV=1	78.4	6.1e-68
TRINITY_DN16705_c0_g1	sp|Q9M084|SYDC2_ARATH	IBI1	Aspartate--tRNA ligase 2, cytoplasmic OS=Arabidopsis thaliana GN=IBI1 PE=1 SV=1	80.5	9.8e-33
TRINITY_DN16719_c0_g1	sp|O23657|RABC1_ARATH	RABC1	Ras-related protein RABC1 OS=Arabidopsis thaliana GN=RABC1 PE=1 SV=1	85.7	8.2e-14
TRINITY_DN16721_c0_g1	sp|Q9ZT71|STA1_ARATH	STA1	Protein STABILIZED1 OS=Arabidopsis thaliana GN=STA1 PE=1 SV=1	84.5	1.4e-20
TRINITY_DN16725_c0_g1	sp|Q9LX14|UFC_ARATH	UFC	Protein UPSTREAM OF FLC OS=Arabidopsis thaliana GN=UFC PE=2 SV=1	33.2	2.3e-38
TRINITY_DN16733_c0_g3	sp|Q94JG1|NRT23_ORYSJ	NRT2.3	High-affinity nitrate transporter 2.3 OS=Oryza sativa subsp. japonica GN=NRT2.3 PE=1 SV=1	73	1.6e-31
TRINITY_DN16733_c0_g4	sp|Q9LPV5|NRT25_ARATH	NRT2.5	High affinity nitrate transporter 2.5 OS=Arabidopsis thaliana GN=NRT2.5 PE=2 SV=1	77.4	5.1e-41
TRINITY_DN16734_c1_g1	sp|Q1EBV7|BASS2_ARATH	BASS2	Sodium/pyruvate cotransporter BASS2, chloroplastic OS=Arabidopsis thaliana GN=BASS2 PE=1 SV=1	79.4	1.4e-170
TRINITY_DN16735_c0_g1	sp|Q8GUH2|Y1015_ARATH	At1g01500	Uncharacterized protein At1g01500 OS=Arabidopsis thaliana GN=At1g01500 PE=2 SV=1	74.3	3.3e-09
TRINITY_DN16739_c0_g1	sp|Q28EB4|NP1L1_XENTR	nap1l1	Nucleosome assembly protein 1-like 1 OS=Xenopus tropicalis GN=nap1l1 PE=2 SV=1	90	1.9e-149
TRINITY_DN16741_c0_g1	sp|P0CQ26|ATP23_CRYNJ	ATP23	Mitochondrial inner membrane protease ATP23 OS=Cryptococcus neoformans var. neoformans serotype D (strain JEC21 / ATCC MYA-565) GN=ATP23 PE=3 SV=1	41.8	1.5e-35
TRINITY_DN16749_c0_g1	sp|P49572|TRPC_ARATH	IGPS	Indole-3-glycerol phosphate synthase, chloroplastic OS=Arabidopsis thaliana GN=IGPS PE=1 SV=2	64.5	8.9e-140
TRINITY_DN16752_c0_g2	sp|Q9FNN5|NDUV1_ARATH	At5g08530	NADH dehydrogenase [ubiquinone] flavoprotein 1, mitochondrial OS=Arabidopsis thaliana GN=At5g08530 PE=2 SV=1	88.5	1.9e-36
TRINITY_DN16754_c0_g1	sp|P25997|EF3_CANAL	CEF3	Elongation factor 3 OS=Candida albicans (strain SC5314 / ATCC MYA-2876) GN=CEF3 PE=1 SV=2	58.5	1.1e-29
TRINITY_DN16754_c0_g3	sp|P29551|EF3_PNECA	TEF3	Elongation factor 3 OS=Pneumocystis carinii GN=TEF3 PE=3 SV=1	50	2.9e-19
TRINITY_DN16754_c0_g4	sp|P16521|EF3A_YEAST	YEF3	Elongation factor 3A OS=Saccharomyces cerevisiae (strain ATCC 204508 / S288c) GN=YEF3 PE=1 SV=4	69.2	1.8e-26
TRINITY_DN16767_c0_g1	sp|Q9FH51|FLXL4_ARATH	FLXL4	Protein FLX-like 4 OS=Arabidopsis thaliana GN=FLXL4 PE=1 SV=1	31.9	8.5e-23
TRINITY_DN16771_c0_g1	sp|Q2N5X0|KYNB_ERYLH	kynB	Kynurenine formamidase OS=Erythrobacter litoralis (strain HTCC2594) GN=kynB PE=3 SV=1	30.4	6.8e-16
TRINITY_DN16773_c0_g1	sp|Q9CAI5|CKL2_ARATH	CKL2	Casein kinase 1-like protein 2 OS=Arabidopsis thaliana GN=CKL2 PE=1 SV=1	91.8	1.9e-32
TRINITY_DN16775_c0_g1	sp|P35132|UBC9_ARATH	UBC9	SUMO-conjugating enzyme UBC9 OS=Arabidopsis thaliana GN=UBC9 PE=1 SV=1	92.6	6.7e-73
TRINITY_DN16776_c1_g1	sp|P0C8Z0|Y8359_ORYSI	OsI_027940	Uncharacterized protein OsI_027940 OS=Oryza sativa subsp. indica GN=OsI_027940 PE=1 SV=2	71.9	2.8e-44
TRINITY_DN1677_c0_g1	sp|O82179|GCSH2_ARATH	GDH2	Glycine cleavage system H protein 2, mitochondrial OS=Arabidopsis thaliana GN=GDH2 PE=2 SV=1	72.7	4.2e-28
TRINITY_DN16782_c0_g1	sp|Q8VXV7|LDL1_ARATH	LDL1	Lysine-specific histone demethylase 1 homolog 1 OS=Arabidopsis thaliana GN=LDL1 PE=1 SV=1	67.9	4.6e-270
TRINITY_DN16783_c0_g2	sp|Q5F3W3|MK06_CHICK	MAPK6	Mitogen-activated protein kinase 6 OS=Gallus gallus GN=MAPK6 PE=2 SV=1	90.8	1.1e-53
TRINITY_DN16788_c0_g2	sp|P46603|HAT9_ARATH	HAT9	Homeobox-leucine zipper protein HAT9 OS=Arabidopsis thaliana GN=HAT9 PE=2 SV=2	56.9	3.3e-23
TRINITY_DN16798_c0_g3	sp|P02401|RLA2_RAT	Rplp2	60S acidic ribosomal protein P2 OS=Rattus norvegicus GN=Rplp2 PE=1 SV=2	82.4	2.7e-23
TRINITY_DN16798_c0_g4	sp|A8XV37|CO145_CAEBR	col-145	Putative cuticle collagen 145 OS=Caenorhabditis briggsae GN=col-145 PE=3 SV=2	55.1	5.1e-20
TRINITY_DN16801_c0_g1	sp|Q9FXT6|PEX14_ARATH	PEX14	Peroxisomal membrane protein PEX14 OS=Arabidopsis thaliana GN=PEX14 PE=1 SV=2	52.4	1.5e-30
TRINITY_DN16801_c0_g2	sp|Q9FXT6|PEX14_ARATH	PEX14	Peroxisomal membrane protein PEX14 OS=Arabidopsis thaliana GN=PEX14 PE=1 SV=2	54.9	1.3e-16
TRINITY_DN16803_c0_g1	sp|Q9SGA6|RS191_ARATH	RPS19A	40S ribosomal protein S19-1 OS=Arabidopsis thaliana GN=RPS19A PE=2 SV=1	89.2	2e-69
TRINITY_DN16807_c0_g1	sp|Q6Z4N4|40G3_ORYSJ	R40G3	Ricin B-like lectin R40G3 OS=Oryza sativa subsp. japonica GN=R40G3 PE=2 SV=1	100	6.5e-12
TRINITY_DN16807_c0_g2	sp|Q6Z4N6|40G2_ORYSJ	R40G2	Ricin B-like lectin R40G2 OS=Oryza sativa subsp. japonica GN=R40G2 PE=2 SV=1	96.7	7.6e-34
TRINITY_DN16808_c0_g1	sp|Q945B6|AOP1L_ARATH	AOP1.2	Probable 2-oxoglutarate-dependent dioxygenase AOP1.2 OS=Arabidopsis thaliana GN=AOP1.2 PE=2 SV=1	44.2	4.3e-69
TRINITY_DN16812_c0_g2	sp|O49858|C82A3_SOYBN	CYP82A3	Cytochrome P450 82A3 OS=Glycine max GN=CYP82A3 PE=2 SV=1	99	1.1e-49
TRINITY_DN16816_c0_g2	sp|Q92QG5|RL22_RHIME	rplV	50S ribosomal protein L22 OS=Rhizobium meliloti (strain 1021) GN=rplV PE=3 SV=1	44.2	1.7e-20
TRINITY_DN16818_c0_g1	sp|H2DH18|C7A12_PANGI	-	Cytochrome P450 CYP736A12 OS=Panax ginseng PE=2 SV=1	56.5	2e-161
TRINITY_DN16824_c1_g2	sp|Q93WL3|CLPT1_ARATH	CLPT1	ATP-dependent Clp protease ATP-binding subunit CLPT1, chloroplastic OS=Arabidopsis thaliana GN=CLPT1 PE=1 SV=1	60.4	5.8e-59
TRINITY_DN16825_c0_g4	sp|P07229|FRI1_LITCT	-	Ferritin, higher subunit OS=Lithobates catesbeiana PE=1 SV=3	80.5	3.3e-13
TRINITY_DN16827_c0_g1	sp|Q9SK09|VCL22_ARATH	At2g28490	Vicilin-like seed storage protein At2g28490 OS=Arabidopsis thaliana GN=At2g28490 PE=2 SV=1	56.4	4e-21
TRINITY_DN16827_c0_g3	sp|O95433|AHSA1_HUMAN	AHSA1	Activator of 90 kDa heat shock protein ATPase homolog 1 OS=Homo sapiens GN=AHSA1 PE=1 SV=1	33.1	3.7e-42
TRINITY_DN16839_c0_g1	sp|Q9M9M4|CSLD3_ARATH	CSLD3	Cellulose synthase-like protein D3 OS=Arabidopsis thaliana GN=CSLD3 PE=1 SV=1	87.5	4.8e-49
TRINITY_DN16840_c1_g1	sp|Q2HFP1|IF4A_CHAGB	TIF1	ATP-dependent RNA helicase eIF4A OS=Chaetomium globosum (strain ATCC 6205 / CBS 148.51 / DSM 1962 / NBRC 6347 / NRRL 1970) GN=TIF1 PE=3 SV=1	100	1e-37
TRINITY_DN16844_c0_g1	sp|Q8JHJ1|RL35_DANRE	rpl35	60S ribosomal protein L35 OS=Danio rerio GN=rpl35 PE=2 SV=3	100	7.8e-57
TRINITY_DN16844_c0_g2	sp|P42766|RL35_HUMAN	RPL35	60S ribosomal protein L35 OS=Homo sapiens GN=RPL35 PE=1 SV=2	100	4.5e-57
TRINITY_DN16845_c0_g1	sp|O75533|SF3B1_HUMAN	SF3B1	Splicing factor 3B subunit 1 OS=Homo sapiens GN=SF3B1 PE=1 SV=3	100	1.8e-46
TRINITY_DN16846_c0_g1	sp|Q9CQK7|RWDD1_MOUSE	Rwdd1	RWD domain-containing protein 1 OS=Mus musculus GN=Rwdd1 PE=1 SV=1	33.2	6.8e-19
TRINITY_DN16849_c0_g2	sp|Q84QC1|GCT23_ARATH	GGCT2;3	Gamma-glutamylcyclotransferase 2-3 OS=Arabidopsis thaliana GN=GGCT2;3 PE=1 SV=1	55.2	1.3e-41
TRINITY_DN16850_c0_g2	sp|P13993|PRP2_SOYBN	PRP2	Repetitive proline-rich cell wall protein 2 OS=Glycine max GN=PRP2 PE=2 SV=1	100	1.4e-08
TRINITY_DN16854_c0_g1	sp|Q2HIM5|MMGT_ARATH	At5g03345	Membrane magnesium transporter OS=Arabidopsis thaliana GN=At5g03345 PE=2 SV=1	76.7	1.7e-39
TRINITY_DN16856_c0_g1	sp|Q8LFP9|ABA4_ARATH	ABA4	Protein ABA DEFICIENT 4, chloroplastic OS=Arabidopsis thaliana GN=ABA4 PE=2 SV=1	70.1	1.2e-66
TRINITY_DN16861_c0_g1	sp|P46302|RS28_MAIZE	RPS28	40S ribosomal protein S28 OS=Zea mays GN=RPS28 PE=3 SV=1	90.8	1.1e-24
TRINITY_DN16865_c0_g2	sp|Q05519|SRS11_HUMAN	SRSF11	Serine/arginine-rich splicing factor 11 OS=Homo sapiens GN=SRSF11 PE=1 SV=1	63.3	3.4e-17
TRINITY_DN16866_c0_g2	sp|O22607|MSI4_ARATH	MSI4	WD-40 repeat-containing protein MSI4 OS=Arabidopsis thaliana GN=MSI4 PE=1 SV=3	79.2	3e-33
TRINITY_DN16869_c0_g4	sp|Q97BG9|DNAJ_THEVO	dnaJ	Chaperone protein DnaJ OS=Thermoplasma volcanium (strain ATCC 51530 / DSM 4299 / JCM 9571 / NBRC 15438 / GSS1) GN=dnaJ PE=3 SV=1	47.4	7.5e-07
TRINITY_DN16870_c0_g1	sp|Q9S7U9|M2K2_ARATH	MKK2	Mitogen-activated protein kinase kinase 2 OS=Arabidopsis thaliana GN=MKK2 PE=1 SV=2	67.2	1e-49
TRINITY_DN16873_c0_g2	sp|Q3ECH5|PP107_ARATH	At1g66345	Pentatricopeptide repeat-containing protein At1g66345, mitochondrial OS=Arabidopsis thaliana GN=At1g66345 PE=3 SV=1	54.3	9.9e-07
TRINITY_DN16874_c0_g1	sp|F4JTJ2|EREL1_ARATH	EREL1	PX domain-containing protein EREL1 OS=Arabidopsis thaliana GN=EREL1 PE=2 SV=1	36.5	1.3e-97
TRINITY_DN16879_c0_g1	sp|Q90YQ4|RS19_ICTPU	rps19	40S ribosomal protein S19 OS=Ictalurus punctatus GN=rps19 PE=2 SV=1	97.6	5.4e-65
TRINITY_DN1687_c0_g1	sp|Q9FFZ1|PPH_ARATH	PPH	Pheophytinase, chloroplastic OS=Arabidopsis thaliana GN=PPH PE=1 SV=1	54.7	7.6e-18
TRINITY_DN16884_c0_g1	sp|Q9SDA8|FBL10_ARATH	FBL10	F-box/LRR-repeat protein 10 OS=Arabidopsis thaliana GN=FBL10 PE=2 SV=1	55.3	2e-148
TRINITY_DN16886_c0_g1	sp|P0CN17|YOP1_CRYNB	YOP1	Protein YOP1 OS=Cryptococcus neoformans var. neoformans serotype D (strain B-3501A) GN=YOP1 PE=3 SV=1	54	1.7e-29
TRINITY_DN16887_c0_g1	sp|Q6S7B0|TAF5_ARATH	TAF5	Transcription initiation factor TFIID subunit 5 OS=Arabidopsis thaliana GN=TAF5 PE=1 SV=1	64.1	3.1e-147
TRINITY_DN16888_c0_g2	sp|Q96287|KSG8_ARATH	ASK8	Shaggy-related protein kinase theta OS=Arabidopsis thaliana GN=ASK8 PE=2 SV=3	69.8	5.8e-182
TRINITY_DN1688_c0_g1	sp|Q56K14|RLA1_BOVIN	RPLP1	60S acidic ribosomal protein P1 OS=Bos taurus GN=RPLP1 PE=3 SV=1	100	1.4e-35
TRINITY_DN16890_c0_g1	sp|O22174|ERF08_ARATH	ERF008	Ethylene-responsive transcription factor ERF008 OS=Arabidopsis thaliana GN=ERF008 PE=2 SV=1	60.1	6.2e-36
TRINITY_DN16894_c0_g1	sp|A7PHN8|CSPL4_VITVI	VIT_17s0000g00560	CASP-like protein 1F1 OS=Vitis vinifera GN=VIT_17s0000g00560 PE=2 SV=2	44.6	1.1e-36
TRINITY_DN16895_c0_g1	sp|Q9BQ04|RBM4B_HUMAN	RBM4B	RNA-binding protein 4B OS=Homo sapiens GN=RBM4B PE=1 SV=1	59.6	4e-47
TRINITY_DN16898_c0_g2	sp|Q8RY25|NU98A_ARATH	NUP98A	Nuclear pore complex protein NUP98A OS=Arabidopsis thaliana GN=NUP98A PE=1 SV=1	58.4	2.1e-16
TRINITY_DN16900_c0_g2	sp|P41568|SUI11_ARATH	At4g27130	Protein translation factor SUI1 homolog 1 OS=Arabidopsis thaliana GN=At4g27130 PE=1 SV=2	87.2	9.4e-13
TRINITY_DN16903_c0_g1	sp|Q9SS31|CML36_ARATH	CML36	Probable calcium-binding protein CML36 OS=Arabidopsis thaliana GN=CML36 PE=2 SV=1	59.3	7.4e-27
TRINITY_DN16909_c0_g2	sp|Q9FXE2|SEOC_ARATH	SEOC	Protein SIEVE ELEMENT OCCLUSION C OS=Arabidopsis thaliana GN=SEOC PE=4 SV=2	45.6	1.7e-10
TRINITY_DN16918_c1_g1	sp|P48672|VIM2_CARAU	-	Vimentin A2 (Fragment) OS=Carassius auratus PE=2 SV=1	83.3	3.6e-27
TRINITY_DN16918_c2_g2	sp|P05787|K2C8_HUMAN	KRT8	Keratin, type II cytoskeletal 8 OS=Homo sapiens GN=KRT8 PE=1 SV=7	77.9	1.5e-23
TRINITY_DN16918_c2_g7	sp|P05787|K2C8_HUMAN	KRT8	Keratin, type II cytoskeletal 8 OS=Homo sapiens GN=KRT8 PE=1 SV=7	100	2.5e-197
TRINITY_DN16920_c0_g1	sp|Q8VYI5|VQ10_ARATH	VQ10	VQ motif-containing protein 10 OS=Arabidopsis thaliana GN=VQ10 PE=1 SV=1	72.2	9.2e-07
TRINITY_DN16923_c0_g1	sp|P63097|GNAI1_BOVIN	GNAI1	Guanine nucleotide-binding protein G(i) subunit alpha-1 OS=Bos taurus GN=GNAI1 PE=2 SV=2	100	6e-37
TRINITY_DN16926_c0_g1	sp|Q8H1T3|FRI2_TOBAC	FER2	Ferritin-2, chloroplastic OS=Nicotiana tabacum GN=FER2 PE=2 SV=1	72.9	4.6e-82
TRINITY_DN16930_c0_g1	sp|Q14094|CCNI_HUMAN	CCNI	Cyclin-I OS=Homo sapiens GN=CCNI PE=2 SV=1	59.5	8.4e-19
TRINITY_DN16932_c0_g1	sp|Q9ZUX4|UMP2_ARATH	At2g27730	Uncharacterized protein At2g27730, mitochondrial OS=Arabidopsis thaliana GN=At2g27730 PE=1 SV=1	57.4	1.5e-22
TRINITY_DN16933_c0_g1	sp|Q8L856|ACFR1_ARATH	CYB561A	Transmembrane ascorbate ferrireductase 1 OS=Arabidopsis thaliana GN=CYB561A PE=1 SV=1	51.6	1.1e-23
TRINITY_DN16941_c0_g1	sp|F4HPH1|DTX22_ARATH	DTX22	Protein DETOXIFICATION 22 OS=Arabidopsis thaliana GN=DTX22 PE=2 SV=1	72.5	3.8e-35
TRINITY_DN16941_c0_g2	sp|Q8W488|DTX21_ARATH	DTX21	Protein DETOXIFICATION 21 OS=Arabidopsis thaliana GN=DTX21 PE=1 SV=1	66.1	1.6e-132
TRINITY_DN16945_c0_g1	sp|Q5Z8P0|P2C60_ORYSJ	Os06g0717800	Probable protein phosphatase 2C 60 OS=Oryza sativa subsp. japonica GN=Os06g0717800 PE=2 SV=1	79.3	4.3e-30
TRINITY_DN16948_c0_g3	sp|Q7XZU3|SAC1_ARATH	SAC1	Phosphoinositide phosphatase SAC1 OS=Arabidopsis thaliana GN=SAC1 PE=1 SV=1	54.3	5.9e-81
TRINITY_DN16950_c0_g2	sp|A6BM07|I7GT1_SOYBN	GmIF7GT1	Isoflavone 7-O-glucosyltransferase 1 OS=Glycine max GN=GmIF7GT1 PE=1 SV=1	50	9.5e-12
TRINITY_DN16957_c0_g1	sp|Q16186|ADRM1_HUMAN	ADRM1	Proteasomal ubiquitin receptor ADRM1 OS=Homo sapiens GN=ADRM1 PE=1 SV=2	100	1.4e-20
TRINITY_DN16957_c0_g2	sp|P18760|COF1_MOUSE	Cfl1	Cofilin-1 OS=Mus musculus GN=Cfl1 PE=1 SV=3	100	8.7e-89
TRINITY_DN16959_c3_g1	sp|Q96524|CRY2_ARATH	CRY2	Cryptochrome-2 OS=Arabidopsis thaliana GN=CRY2 PE=1 SV=2	69.9	9.1e-63
TRINITY_DN16960_c0_g2	sp|Q9ZSK5|ZOG_PHALU	ZOG1	Zeatin O-glucosyltransferase OS=Phaseolus lunatus GN=ZOG1 PE=2 SV=1	61.2	6.3e-11
TRINITY_DN16961_c0_g1	sp|Q7XZU3|SAC1_ARATH	SAC1	Phosphoinositide phosphatase SAC1 OS=Arabidopsis thaliana GN=SAC1 PE=1 SV=1	66.7	1.4e-48
TRINITY_DN16968_c0_g5	sp|P21333|FLNA_HUMAN	FLNA	Filamin-A OS=Homo sapiens GN=FLNA PE=1 SV=4	84.3	9.7e-30
TRINITY_DN16968_c0_g8	sp|Q8BTM8|FLNA_MOUSE	Flna	Filamin-A OS=Mus musculus GN=Flna PE=1 SV=5	88.9	6.5e-50
TRINITY_DN16974_c0_g1	sp|Q9SUV9|INP1_ARATH	INP1	Protein INAPERTURATE POLLEN1 OS=Arabidopsis thaliana GN=INP1 PE=2 SV=1	43.3	2.9e-20
TRINITY_DN16976_c0_g2	sp|Q9LMN4|LSM3A_ARATH	LSM3A	Sm-like protein LSM3A OS=Arabidopsis thaliana GN=LSM3A PE=1 SV=1	87.2	9.5e-42
TRINITY_DN16978_c3_g4	sp|P93484|VSR1_PEA	BP80	Vacuolar-sorting receptor 1 OS=Pisum sativum GN=BP80 PE=1 SV=1	92.9	4.5e-37
TRINITY_DN16979_c0_g1	sp|Q3E9D5|DCAM4_ARATH	SAMDC4	S-adenosylmethionine decarboxylase proenzyme 4 OS=Arabidopsis thaliana GN=SAMDC4 PE=1 SV=1	73.8	4.6e-46
TRINITY_DN16981_c0_g2	sp|Q9LTR2|TGD2_ARATH	TGD2	Protein TRIGALACTOSYLDIACYLGLYCEROL 2, chloroplastic OS=Arabidopsis thaliana GN=TGD2 PE=1 SV=1	71	2.7e-141
TRINITY_DN16983_c0_g1	sp|O64639|Y2559_ARATH	At2g45590	Receptor-like serine/threonine-protein kinase At2g45590 OS=Arabidopsis thaliana GN=At2g45590 PE=2 SV=1	54.8	5.4e-134
TRINITY_DN16986_c0_g1	sp|Q9ZNV9|AHP1_ARATH	AHP1	Histidine-containing phosphotransfer protein 1 OS=Arabidopsis thaliana GN=AHP1 PE=1 SV=1	47.7	1.1e-31
TRINITY_DN16989_c0_g2	sp|Q5D0W8|NPR1_ORYSI	NPR1	BTB/POZ domain and ankyrin repeat-containing protein NPR1 OS=Oryza sativa subsp. indica GN=NPR1 PE=1 SV=1	56.6	1.2e-160
TRINITY_DN16990_c0_g1	sp|O64571|UBA1C_ARATH	UBA1C	UBP1-associated proteins 1C OS=Arabidopsis thaliana GN=UBA1C PE=3 SV=2	33.1	6.6e-32
TRINITY_DN16991_c1_g1	sp|Q5M750|VQ4_ARATH	VQ4	VQ motif-containing protein 4 OS=Arabidopsis thaliana GN=VQ4 PE=1 SV=1	51	5.1e-49
TRINITY_DN16995_c0_g1	sp|Q8GWZ6|SRR1_ARATH	SRR1	Protein SENSITIVITY TO RED LIGHT REDUCED 1 OS=Arabidopsis thaliana GN=SRR1 PE=2 SV=2	51.3	1.3e-69
TRINITY_DN16998_c0_g2	sp|Q1H5C9|OP24A_ARATH	OEP24A	Outer envelope pore protein 24A, chloroplastic OS=Arabidopsis thaliana GN=OEP24A PE=1 SV=1	60.7	1.4e-69
TRINITY_DN16999_c0_g8	sp|P05064|ALDOA_MOUSE	Aldoa	Fructose-bisphosphate aldolase A OS=Mus musculus GN=Aldoa PE=1 SV=2	100	6.2e-34
TRINITY_DN17000_c0_g1	sp|Q9SXC4|IRX9H_ARATH	IRX9H	Probable beta-1,4-xylosyltransferase IRX9H OS=Arabidopsis thaliana GN=IRX9H PE=2 SV=2	61.8	1.1e-133
TRINITY_DN17009_c0_g1	sp|O81155|CYSKP_SOLTU	-	Cysteine synthase, chloroplastic/chromoplastic OS=Solanum tuberosum PE=2 SV=1	78.3	6.5e-166
TRINITY_DN17010_c0_g1	sp|Q3T0W9|RL19_BOVIN	RPL19	60S ribosomal protein L19 OS=Bos taurus GN=RPL19 PE=2 SV=1	100	1.7e-84
TRINITY_DN17010_c0_g2	sp|Q90YU8|RL19_ICTPU	rpl19	60S ribosomal protein L19 OS=Ictalurus punctatus GN=rpl19 PE=2 SV=1	97	8.7e-84
TRINITY_DN17010_c0_g3	sp|Q90YU8|RL19_ICTPU	rpl19	60S ribosomal protein L19 OS=Ictalurus punctatus GN=rpl19 PE=2 SV=1	98	2.8e-47
TRINITY_DN17012_c0_g1	sp|Q9SS17|RS241_ARATH	RPS24A	40S ribosomal protein S24-1 OS=Arabidopsis thaliana GN=RPS24A PE=2 SV=1	82.7	2.2e-44
TRINITY_DN17014_c0_g1	sp|Q9LZG0|ADK2_ARATH	ADK2	Adenosine kinase 2 OS=Arabidopsis thaliana GN=ADK2 PE=1 SV=1	84.4	4.8e-16
TRINITY_DN17016_c1_g1	sp|P48672|VIM2_CARAU	-	Vimentin A2 (Fragment) OS=Carassius auratus PE=2 SV=1	93.9	5.4e-44
TRINITY_DN17016_c1_g2	sp|P48674|VIME_ONCMY	vim	Vimentin OS=Oncorhynchus mykiss GN=vim PE=2 SV=1	83.1	1.4e-26
TRINITY_DN17016_c1_g3	sp|P08670|VIME_HUMAN	VIM	Vimentin OS=Homo sapiens GN=VIM PE=1 SV=4	100	2.4e-137
TRINITY_DN17023_c0_g1	sp|Q6PC14|RL23_DANRE	rpl23	60S ribosomal protein L23 OS=Danio rerio GN=rpl23 PE=2 SV=1	100	1.4e-59
TRINITY_DN17026_c1_g2	sp|P35268|RL22_HUMAN	RPL22	60S ribosomal protein L22 OS=Homo sapiens GN=RPL22 PE=1 SV=2	95.1	1.8e-60
TRINITY_DN17026_c1_g6	sp|Q9M9W1|RL222_ARATH	RPL22B	60S ribosomal protein L22-2 OS=Arabidopsis thaliana GN=RPL22B PE=2 SV=1	84.6	3.3e-52
TRINITY_DN17028_c0_g5	sp|P04323|POL3_DROME	pol	Retrovirus-related Pol polyprotein from transposon 17.6 OS=Drosophila melanogaster GN=pol PE=3 SV=1	41.7	1.3e-15
TRINITY_DN17034_c0_g1	sp|Q9LIG0|Y3136_ARATH	At3g21360	Clavaminate synthase-like protein At3g21360 OS=Arabidopsis thaliana GN=At3g21360 PE=1 SV=1	40.3	2.3e-66
TRINITY_DN17035_c0_g3	sp|Q8W035|FPGS3_ARATH	FPGS3	Folylpolyglutamate synthase OS=Arabidopsis thaliana GN=FPGS3 PE=1 SV=1	64.7	3.3e-12
TRINITY_DN17036_c0_g1	sp|P25975|CATL1_BOVIN	CTSL	Cathepsin L1 OS=Bos taurus GN=CTSL PE=1 SV=3	59.8	1.3e-77
TRINITY_DN17039_c0_g2	sp|Q65CJ7|HPPR_PLESU	HPPR	Hydroxyphenylpyruvate reductase OS=Plectranthus scutellarioides GN=HPPR PE=1 SV=2	68.4	1.9e-119
TRINITY_DN17040_c0_g1	sp|Q9LTC0|PBL19_ARATH	PBL19	Probable serine/threonine-protein kinase PBL19 OS=Arabidopsis thaliana GN=PBL19 PE=1 SV=1	64.8	1.8e-61
TRINITY_DN17044_c0_g2	sp|Q8LD26|DRMH3_ARATH	At1g56220	Dormancy-associated protein homolog 3 OS=Arabidopsis thaliana GN=At1g56220 PE=1 SV=1	50	3.8e-23
TRINITY_DN17045_c0_g1	sp|Q8VZT8|RT11_ARATH	NFD3	Probable ribosomal protein S11, mitochondrial OS=Arabidopsis thaliana GN=NFD3 PE=2 SV=1	60.8	2.9e-42
TRINITY_DN17046_c0_g2	sp|Q6NZT6|I2B2A_DANRE	irf2bp2a	Interferon regulatory factor 2-binding protein 2-A OS=Danio rerio GN=irf2bp2a PE=2 SV=1	100	8.5e-39
TRINITY_DN17048_c0_g2	sp|Q9SFC6|GDIR_ARATH	GDI1	Rho GDP-dissociation inhibitor 1 OS=Arabidopsis thaliana GN=GDI1 PE=1 SV=1	74.6	3.6e-77
TRINITY_DN17054_c0_g2	sp|Q94901|LARK_DROME	lark	RNA-binding protein lark OS=Drosophila melanogaster GN=lark PE=1 SV=1	24.3	6.5e-08
TRINITY_DN17055_c0_g3	sp|P28186|RAE1C_ARATH	RABE1C	Ras-related protein RABE1c OS=Arabidopsis thaliana GN=RABE1C PE=1 SV=1	98.6	2.2e-33
TRINITY_DN17056_c0_g1	sp|F4KBF5|KITHB_ARATH	TK1B	Thymidine kinase b OS=Arabidopsis thaliana GN=TK1B PE=1 SV=1	59.1	3.1e-87
TRINITY_DN17058_c0_g1	sp|Q9Z0U9|S1PR3_MOUSE	S1pr3	Sphingosine 1-phosphate receptor 3 OS=Mus musculus GN=S1pr3 PE=2 SV=1	45.9	4.6e-71
TRINITY_DN1705_c0_g1	sp|P02016|HBA_CYPCA	hba	Hemoglobin subunit alpha OS=Cyprinus carpio GN=hba PE=1 SV=3	78.3	3.1e-32
TRINITY_DN17065_c0_g1	sp|P49211|RL321_ARATH	RPL32A	60S ribosomal protein L32-1 OS=Arabidopsis thaliana GN=RPL32A PE=2 SV=2	84.2	6.3e-59
TRINITY_DN17068_c0_g1	sp|Q93WI0|STR12_ARATH	At5g19370	Rhodanese-like/PpiC domain-containing protein 12, chloroplastic OS=Arabidopsis thaliana GN=At5g19370 PE=1 SV=1	70.6	2.8e-87
TRINITY_DN17072_c0_g1	sp|Q67YI9|EPN2_ARATH	EPSIN2	Clathrin interactor EPSIN 2 OS=Arabidopsis thaliana GN=EPSIN2 PE=1 SV=1	79.5	2.7e-81
TRINITY_DN17073_c0_g1	sp|Q9LYW3|MED7A_ARATH	MED7A	Mediator of RNA polymerase II transcription subunit 7a OS=Arabidopsis thaliana GN=MED7A PE=1 SV=1	78.6	1.7e-69
TRINITY_DN17074_c0_g1	sp|Q9FYL8|NFD2_ARATH	NFD2	Protein NUCLEAR FUSION DEFECTIVE 2 OS=Arabidopsis thaliana GN=NFD2 PE=2 SV=1	56.3	8.4e-44
TRINITY_DN17079_c0_g1	sp|P46302|RS28_MAIZE	RPS28	40S ribosomal protein S28 OS=Zea mays GN=RPS28 PE=3 SV=1	87.7	1.2e-23
TRINITY_DN17080_c0_g1	sp|Q9LK40|NRPD2_ARATH	NRPD2	DNA-directed RNA polymerases IV and V subunit 2 OS=Arabidopsis thaliana GN=NRPD2 PE=1 SV=1	56.8	1.9e-312
TRINITY_DN17080_c0_g2	sp|Q9LK40|NRPD2_ARATH	NRPD2	DNA-directed RNA polymerases IV and V subunit 2 OS=Arabidopsis thaliana GN=NRPD2 PE=1 SV=1	71.4	5.1e-105
TRINITY_DN17084_c0_g1	sp|Q05966|GRP10_BRANA	GRP10	Glycine-rich RNA-binding protein 10 OS=Brassica napus GN=GRP10 PE=2 SV=1	38.6	3e-10
TRINITY_DN17086_c1_g2	sp|P28186|RAE1C_ARATH	RABE1C	Ras-related protein RABE1c OS=Arabidopsis thaliana GN=RABE1C PE=1 SV=1	85.1	1.2e-55
TRINITY_DN17086_c1_g3	sp|O24466|RAE1A_ARATH	RABE1A	Ras-related protein RABE1a OS=Arabidopsis thaliana GN=RABE1A PE=1 SV=1	96.8	1.5e-26
TRINITY_DN17091_c0_g1	sp|P37806|UNC87_CAEEL	unc-87	Protein unc-87 OS=Caenorhabditis elegans GN=unc-87 PE=1 SV=3	88.9	8.2e-26
TRINITY_DN17092_c0_g1	sp|P98088|MUC5A_HUMAN	MUC5AC	Mucin-5AC OS=Homo sapiens GN=MUC5AC PE=1 SV=4	53.3	3.5e-13
TRINITY_DN17095_c0_g1	sp|Q8BHB4|WDR3_MOUSE	Wdr3	WD repeat-containing protein 3 OS=Mus musculus GN=Wdr3 PE=1 SV=1	48.9	1.4e-57
TRINITY_DN1709_c0_g1	sp|Q9FIJ2|NDUA2_ARATH	At5g47890	NADH dehydrogenase [ubiquinone] 1 alpha subcomplex subunit 2 OS=Arabidopsis thaliana GN=At5g47890 PE=3 SV=1	71	4e-21
TRINITY_DN17103_c0_g1	sp|Q52KI8|SRRM1_MOUSE	Srrm1	Serine/arginine repetitive matrix protein 1 OS=Mus musculus GN=Srrm1 PE=1 SV=2	52.5	4.4e-35
TRINITY_DN17108_c0_g1	sp|O15519|CFLAR_HUMAN	CFLAR	CASP8 and FADD-like apoptosis regulator OS=Homo sapiens GN=CFLAR PE=1 SV=1	53.3	1.4e-11
TRINITY_DN17110_c0_g1	sp|F4KAF2|MORC4_ARATH	MORC4	Protein MICRORCHIDIA 4 OS=Arabidopsis thaliana GN=MORC4 PE=1 SV=2	56.7	7.7e-211
TRINITY_DN17113_c0_g1	sp|Q4VCM1|LCAT2_ARATH	PSAT	Phospholipid--sterol O-acyltransferase OS=Arabidopsis thaliana GN=PSAT PE=2 SV=2	78.8	5e-53
TRINITY_DN17114_c1_g1	sp|Q8L953|RS273_ARATH	RPS27D	40S ribosomal protein S27-3 OS=Arabidopsis thaliana GN=RPS27D PE=2 SV=2	86	5.5e-17
TRINITY_DN17117_c0_g1	sp|Q8LPQ5|BTS_ARATH	BTS	Zinc finger protein BRUTUS OS=Arabidopsis thaliana GN=BTS PE=1 SV=1	75.9	6.5e-20
TRINITY_DN17118_c0_g1	sp|Q9C7N2|CAD1_ARATH	CAD1	MACPF domain-containing protein CAD1 OS=Arabidopsis thaliana GN=CAD1 PE=2 SV=1	58.8	2.4e-23
TRINITY_DN17118_c0_g2	sp|Q9C7N2|CAD1_ARATH	CAD1	MACPF domain-containing protein CAD1 OS=Arabidopsis thaliana GN=CAD1 PE=2 SV=1	73.8	1.5e-60
TRINITY_DN17119_c0_g1	sp|Q41975|TIP22_ARATH	TIP2-2	Probable aquaporin TIP2-2 OS=Arabidopsis thaliana GN=TIP2-2 PE=1 SV=2	78.8	7e-106
TRINITY_DN17120_c0_g1	sp|F4JY24|CHR17_ARATH	CHR17	ISWI chromatin-remodeling complex ATPase CHR17 OS=Arabidopsis thaliana GN=CHR17 PE=1 SV=1	89	4.6e-69
TRINITY_DN17121_c0_g1	sp|Q9SF32|IQD1_ARATH	IQD1	Protein IQ-DOMAIN 1 OS=Arabidopsis thaliana GN=IQD1 PE=1 SV=1	36.6	8.9e-10
TRINITY_DN17124_c0_g2	sp|Q9C9C6|RL62_ARATH	RPL6B	60S ribosomal protein L6-2 OS=Arabidopsis thaliana GN=RPL6B PE=2 SV=1	86.8	1e-36
TRINITY_DN17124_c0_g3	sp|Q9FZ76|RL61_ARATH	RPL6A	60S ribosomal protein L6-1 OS=Arabidopsis thaliana GN=RPL6A PE=2 SV=1	77.8	1.6e-35
TRINITY_DN17130_c0_g2	sp|Q8VZU9|DERL1_ARATH	DER1	Derlin-1 OS=Arabidopsis thaliana GN=DER1 PE=2 SV=1	70.3	7.9e-100
TRINITY_DN17132_c0_g1	sp|P0CJ66|Y1705_ARATH	At1g27050	Uncharacterized protein At1g27050 OS=Arabidopsis thaliana GN=At1g27050 PE=2 SV=1	45.9	1.1e-39
TRINITY_DN17134_c0_g1	sp|Q47LK4|RL24_THEFY	rplX	50S ribosomal protein L24 OS=Thermobifida fusca (strain YX) GN=rplX PE=3 SV=1	56.6	2.8e-23
TRINITY_DN17135_c1_g9	sp|Q06915|EA6_ARATH	A6	Probable glucan endo-1,3-beta-glucosidase A6 OS=Arabidopsis thaliana GN=A6 PE=2 SV=1	52.2	4.1e-140
TRINITY_DN17136_c0_g1	sp|P44331|RBSK_HAEIN	rbsK	Ribokinase OS=Haemophilus influenzae (strain ATCC 51907 / DSM 11121 / KW20 / Rd) GN=rbsK PE=3 SV=1	35.5	9.3e-42
TRINITY_DN17137_c0_g1	sp|A0MDQ1|URM11_ARATH	URM1-1	Ubiquitin-related modifier 1 homolog 1 OS=Arabidopsis thaliana GN=URM1-1 PE=3 SV=2	92.1	1.7e-14
TRINITY_DN17140_c0_g1	sp|Q9LRB0|LCBK1_ARATH	LCBK1	Sphingoid long-chain bases kinase 1 OS=Arabidopsis thaliana GN=LCBK1 PE=1 SV=1	50.6	5.5e-08
TRINITY_DN17144_c1_g1	sp|Q9FWW3|GSXL6_ARATH	At1g12130	Flavin-containing monooxygenase FMO GS-OX-like 6 OS=Arabidopsis thaliana GN=At1g12130 PE=2 SV=1	69.5	1.5e-15
TRINITY_DN17145_c1_g3	sp|Q5XET5|HESO1_ARATH	HESO1	Protein HESO1 OS=Arabidopsis thaliana GN=HESO1 PE=1 SV=1	52.4	1.5e-110
TRINITY_DN17146_c0_g1	sp|P25076|CY11_SOLTU	CYCL	Cytochrome c1-1, heme protein, mitochondrial OS=Solanum tuberosum GN=CYCL PE=2 SV=1	93.6	4.9e-75
TRINITY_DN17146_c0_g5	sp|Q9FKS5|CYC1B_ARATH	CYC12	Cytochrome c1 2, heme protein, mitochondrial OS=Arabidopsis thaliana GN=CYC12 PE=1 SV=1	66.3	2.4e-22
TRINITY_DN17147_c0_g3	sp|Q9UEY8|ADDG_HUMAN	ADD3	Gamma-adducin OS=Homo sapiens GN=ADD3 PE=1 SV=1	76.1	7.7e-14
TRINITY_DN17148_c0_g1	sp|O80786|MCM5_ARATH	MCM5	DNA replication licensing factor MCM5 OS=Arabidopsis thaliana GN=MCM5 PE=1 SV=1	87.9	8.1e-08
TRINITY_DN17148_c0_g2	sp|O80786|MCM5_ARATH	MCM5	DNA replication licensing factor MCM5 OS=Arabidopsis thaliana GN=MCM5 PE=1 SV=1	77.9	0
TRINITY_DN17149_c0_g7	sp|Q0WPJ7|RF298_ARATH	RF298	Putative E3 ubiquitin-protein ligase RF298 OS=Arabidopsis thaliana GN=RF298 PE=2 SV=1	33.4	3e-23
TRINITY_DN17150_c0_g2	sp|P10960|SAP_RAT	Psap	Prosaposin OS=Rattus norvegicus GN=Psap PE=1 SV=1	100	8e-72
TRINITY_DN17151_c0_g1	sp|O65082|RL15B_PICMA	SB62	60S ribosomal protein L15-2 OS=Picea mariana GN=SB62 PE=2 SV=1	86.6	4.1e-56
TRINITY_DN17151_c0_g10	sp|Q5EAD6|RL15_BOVIN	RPL15	60S ribosomal protein L15 OS=Bos taurus GN=RPL15 PE=2 SV=3	100	1e-75
TRINITY_DN17151_c0_g2	sp|Q7T3N9|RL15_CARAU	rpl15	60S ribosomal protein L15 OS=Carassius auratus GN=rpl15 PE=2 SV=3	99.4	1.1e-92
TRINITY_DN17151_c0_g3	sp|Q7T3N8|RL15_CTEID	rpl15	60S ribosomal protein L15 OS=Ctenopharyngodon idella GN=rpl15 PE=2 SV=3	96.1	1e-68
TRINITY_DN17151_c0_g4	sp|O82528|RL15_PETHY	RPL15	60S ribosomal protein L15 OS=Petunia hybrida GN=RPL15 PE=2 SV=1	90.8	1e-34
TRINITY_DN17151_c0_g5	sp|O65082|RL15B_PICMA	SB62	60S ribosomal protein L15-2 OS=Picea mariana GN=SB62 PE=2 SV=1	89	3.6e-81
TRINITY_DN17151_c0_g6	sp|O23515|RL151_ARATH	RPL15A	60S ribosomal protein L15-1 OS=Arabidopsis thaliana GN=RPL15A PE=2 SV=1	95.1	3.9e-51
TRINITY_DN17151_c0_g7	sp|O82528|RL15_PETHY	RPL15	60S ribosomal protein L15 OS=Petunia hybrida GN=RPL15 PE=2 SV=1	60	6.6e-64
TRINITY_DN17151_c0_g8	sp|O82528|RL15_PETHY	RPL15	60S ribosomal protein L15 OS=Petunia hybrida GN=RPL15 PE=2 SV=1	89.2	1.2e-103
TRINITY_DN17151_c0_g9	sp|Q7T3N8|RL15_CTEID	rpl15	60S ribosomal protein L15 OS=Ctenopharyngodon idella GN=rpl15 PE=2 SV=3	100	2.8e-87
TRINITY_DN17154_c0_g1	sp|Q3MHR7|ARPC2_BOVIN	ARPC2	Actin-related protein 2/3 complex subunit 2 OS=Bos taurus GN=ARPC2 PE=1 SV=1	88.7	5.2e-30
TRINITY_DN17154_c0_g2	sp|Q3MHR7|ARPC2_BOVIN	ARPC2	Actin-related protein 2/3 complex subunit 2 OS=Bos taurus GN=ARPC2 PE=1 SV=1	95.7	8.1e-33
TRINITY_DN17155_c0_g1	sp|Q93YW5|P2C58_ARATH	At4g28400	Probable protein phosphatase 2C 58 OS=Arabidopsis thaliana GN=At4g28400 PE=2 SV=1	69.5	1.2e-86
TRINITY_DN17158_c0_g1	sp|Q7K486|ARMC6_DROME	CG5721	Armadillo repeat-containing protein 6 homolog OS=Drosophila melanogaster GN=CG5721 PE=1 SV=1	25.3	2.3e-27
TRINITY_DN17161_c0_g6	sp|Q9SIL5|PP165_ARATH	PCMP-E78	Pentatricopeptide repeat-containing protein At2g20540 OS=Arabidopsis thaliana GN=PCMP-E78 PE=2 SV=1	40.7	4.9e-16
TRINITY_DN17163_c0_g2	sp|Q05001|NCPR_CATRO	CPR	NADPH--cytochrome P450 reductase OS=Catharanthus roseus GN=CPR PE=2 SV=1	76.8	3.2e-217
TRINITY_DN17163_c0_g4	sp|Q05001|NCPR_CATRO	CPR	NADPH--cytochrome P450 reductase OS=Catharanthus roseus GN=CPR PE=2 SV=1	80.9	5.7e-60
TRINITY_DN17164_c2_g3	sp|Q0JJ01|NPR2_ORYSJ	NPR2	BTB/POZ domain and ankyrin repeat-containing protein NPR2 OS=Oryza sativa subsp. japonica GN=NPR2 PE=1 SV=1	61.7	2.9e-89
TRINITY_DN17164_c2_g5	sp|Q8L746|NPR3_ARATH	NPR3	Regulatory protein NPR3 OS=Arabidopsis thaliana GN=NPR3 PE=1 SV=1	60.3	2.1e-90
TRINITY_DN17165_c1_g3	sp|Q5K654|CLF1_PARBR	CLF1	Pre-mRNA-splicing factor CLF1 OS=Paracoccidioides brasiliensis GN=CLF1 PE=3 SV=1	57.6	3.6e-99
TRINITY_DN17168_c0_g2	sp|P50883|RL121_ARATH	RPL12A	60S ribosomal protein L12-1 OS=Arabidopsis thaliana GN=RPL12A PE=2 SV=2	81.2	4.8e-26
TRINITY_DN17168_c0_g3	sp|P50883|RL121_ARATH	RPL12A	60S ribosomal protein L12-1 OS=Arabidopsis thaliana GN=RPL12A PE=2 SV=2	90.2	4.8e-80
TRINITY_DN17170_c0_g1	sp|Q9FX85|PER10_ARATH	PER10	Peroxidase 10 OS=Arabidopsis thaliana GN=PER10 PE=1 SV=1	60.9	8.7e-103
TRINITY_DN17171_c0_g1	sp|A8MRP2|AIGLD_ARATH	AIG2LD	AIG2-like protein D OS=Arabidopsis thaliana GN=AIG2LD PE=2 SV=1	64.2	1.4e-47
TRINITY_DN17173_c0_g1	sp|Q01882|RAG2_ORYSJ	RAG2	Seed allergenic protein RAG2 OS=Oryza sativa subsp. japonica GN=RAG2 PE=1 SV=2	100	1.8e-97
TRINITY_DN17173_c0_g3	sp|Q01882|RAG2_ORYSJ	RAG2	Seed allergenic protein RAG2 OS=Oryza sativa subsp. japonica GN=RAG2 PE=1 SV=2	69.3	8.6e-62
TRINITY_DN17174_c0_g1	sp|Q75HY5|RSLE3_ORYSJ	Os05g0583200	Zinc finger BED domain-containing protein RICESLEEPER 3 OS=Oryza sativa subsp. japonica GN=Os05g0583200 PE=2 SV=1	42.3	1.4e-18
TRINITY_DN17184_c0_g1	sp|Q6S9E0|TTP_SHEEP	ZFP36	mRNA decay activator protein ZFP36 OS=Ovis aries GN=ZFP36 PE=2 SV=1	42.6	1.2e-13
TRINITY_DN17185_c0_g2	sp|Q5ZJK8|TCPH_CHICK	CCT7	T-complex protein 1 subunit eta OS=Gallus gallus GN=CCT7 PE=1 SV=1	97.5	1.2e-63
TRINITY_DN17186_c0_g1	sp|P85524|KIRO_ACTDE	-	Kirola OS=Actinidia deliciosa PE=1 SV=1	52.3	8.3e-40
TRINITY_DN17188_c0_g1	sp|Q9SZE1|3HID1_ARATH	At4g29120	Probable 3-hydroxyisobutyrate dehydrogenase-like 1, mitochondrial OS=Arabidopsis thaliana GN=At4g29120 PE=1 SV=1	78.8	3.3e-82
TRINITY_DN17190_c0_g1	sp|P41105|RL28_MOUSE	Rpl28	60S ribosomal protein L28 OS=Mus musculus GN=Rpl28 PE=1 SV=2	80.9	4.1e-56
TRINITY_DN17191_c0_g1	sp|Q7Y1W1|TIC56_ARATH	TIC56	Protein TIC 56, chloroplastic OS=Arabidopsis thaliana GN=TIC56 PE=1 SV=1	68.1	6.3e-204
TRINITY_DN17195_c0_g1	sp|Q8W234|SEUSS_ARATH	SEU	Transcriptional corepressor SEUSS OS=Arabidopsis thaliana GN=SEU PE=1 SV=1	38.8	2.9e-07
TRINITY_DN17196_c0_g1	sp|Q42059|GUN6_ARATH	At1g64390	Endoglucanase 6 OS=Arabidopsis thaliana GN=At1g64390 PE=2 SV=2	66.8	4.8e-93
TRINITY_DN17197_c0_g1	sp|F4I274|PHL8_ARATH	PHL8	Myb family transcription factor PHL8 OS=Arabidopsis thaliana GN=PHL8 PE=2 SV=1	50.6	2.5e-49
TRINITY_DN17202_c1_g2	sp|B5DGM7|ALDOA_SALSA	-	Fructose-bisphosphate aldolase A OS=Salmo salar PE=1 SV=1	91.7	4.5e-32
TRINITY_DN17204_c2_g1	sp|Q9M2Q4|NT102_ARATH	At3g57940	RNA cytidine acetyltransferase 2 OS=Arabidopsis thaliana GN=At3g57940 PE=2 SV=2	42.9	5.9e-07
TRINITY_DN17205_c0_g1	sp|Q9SIE7|PLAT2_ARATH	PLAT2	PLAT domain-containing protein 2 OS=Arabidopsis thaliana GN=PLAT2 PE=2 SV=1	56.8	2e-48
TRINITY_DN17207_c0_g1	sp|Q90YR4|RS10_ICTPU	rps10	40S ribosomal protein S10 OS=Ictalurus punctatus GN=rps10 PE=2 SV=1	100	1.6e-48
TRINITY_DN17207_c0_g2	sp|Q90YR4|RS10_ICTPU	rps10	40S ribosomal protein S10 OS=Ictalurus punctatus GN=rps10 PE=2 SV=1	99.3	2.6e-75
TRINITY_DN17208_c0_g1	sp|P62846|RS15_CHICK	RPS15	40S ribosomal protein S15 OS=Gallus gallus GN=RPS15 PE=2 SV=2	97.2	2.1e-74
TRINITY_DN17214_c0_g1	sp|Q8N2U0|TM256_HUMAN	TMEM256	Transmembrane protein 256 OS=Homo sapiens GN=TMEM256 PE=3 SV=1	33.7	1.1e-09
TRINITY_DN17216_c0_g1	sp|Q5YLB4|GYRB_NICBE	GYRB	DNA gyrase subunit B, chloroplastic/mitochondrial OS=Nicotiana benthamiana GN=GYRB PE=2 SV=1	87.4	1.2e-140
TRINITY_DN17216_c0_g3	sp|Q5YLB4|GYRB_NICBE	GYRB	DNA gyrase subunit B, chloroplastic/mitochondrial OS=Nicotiana benthamiana GN=GYRB PE=2 SV=1	74.6	9.1e-168
TRINITY_DN17218_c0_g11	sp|Q4R1I9|ANGLT_ROSHC	RhGT1	Anthocyanidin 5,3-O-glucosyltransferase OS=Rosa hybrid cultivar GN=RhGT1 PE=2 SV=1	54.7	7.3e-06
TRINITY_DN17218_c0_g7	sp|Q4R1I9|ANGLT_ROSHC	RhGT1	Anthocyanidin 5,3-O-glucosyltransferase OS=Rosa hybrid cultivar GN=RhGT1 PE=2 SV=1	66.3	1.4e-27
TRINITY_DN17219_c0_g1	sp|P63273|RS17_CANLF	RPS17	40S ribosomal protein S17 OS=Canis lupus familiaris GN=RPS17 PE=2 SV=2	98.5	1.1e-65
TRINITY_DN17219_c0_g2	sp|P63273|RS17_CANLF	RPS17	40S ribosomal protein S17 OS=Canis lupus familiaris GN=RPS17 PE=2 SV=2	92.9	2.1e-61
TRINITY_DN17219_c0_g3	sp|P08708|RS17_HUMAN	RPS17	40S ribosomal protein S17 OS=Homo sapiens GN=RPS17 PE=1 SV=2	100	1.3e-70
TRINITY_DN17220_c1_g1	sp|Q941F1|PLA15_ARATH	At1g06800	Phospholipase A1-Igamma1, chloroplastic OS=Arabidopsis thaliana GN=At1g06800 PE=1 SV=2	53.5	3.2e-17
TRINITY_DN17220_c1_g2	sp|Q941F1|PLA15_ARATH	At1g06800	Phospholipase A1-Igamma1, chloroplastic OS=Arabidopsis thaliana GN=At1g06800 PE=1 SV=2	49.1	3.5e-42
TRINITY_DN17221_c0_g2	sp|Q9SFU0|SC24A_ARATH	At3g07100	Protein transport protein Sec24-like At3g07100 OS=Arabidopsis thaliana GN=At3g07100 PE=2 SV=2	77.6	0
TRINITY_DN17225_c0_g2	sp|Q8GYH6|RTNLP_ARATH	RTNLB16	Reticulon-like protein B16 OS=Arabidopsis thaliana GN=RTNLB16 PE=2 SV=1	60	6.5e-12
TRINITY_DN17226_c0_g2	sp|Q39211|NRPB3_ARATH	NRPB3	DNA-directed RNA polymerases II, IV and V subunit 3 OS=Arabidopsis thaliana GN=NRPB3 PE=1 SV=1	78.2	3.2e-138
TRINITY_DN17226_c0_g3	sp|Q8VY16|CDP1_ARATH	CDP1	Plastid division protein CDP1, chloroplastic OS=Arabidopsis thaliana GN=CDP1 PE=1 SV=2	55.7	1.9e-231
TRINITY_DN17227_c0_g2	sp|Q13243|SRSF5_HUMAN	SRSF5	Serine/arginine-rich splicing factor 5 OS=Homo sapiens GN=SRSF5 PE=1 SV=1	68.9	1.4e-64
TRINITY_DN17228_c0_g1	sp|Q8W206|CSN6A_ARATH	CSN6A	COP9 signalosome complex subunit 6a OS=Arabidopsis thaliana GN=CSN6A PE=1 SV=2	78.4	2.4e-136
TRINITY_DN17234_c0_g1	sp|F1MK05|RN170_BOVIN	RNF170	E3 ubiquitin-protein ligase RNF170 OS=Bos taurus GN=RNF170 PE=3 SV=2	34.7	3.8e-16
TRINITY_DN17235_c0_g2	sp|Q7Y0E8|NRX11_ORYSJ	Os03g0405500	Probable nucleoredoxin 1-1 OS=Oryza sativa subsp. japonica GN=Os03g0405500 PE=2 SV=1	33.6	4e-26
TRINITY_DN17242_c1_g1	sp|Q93VR3|GME_ARATH	At5g28840	GDP-mannose 3,5-epimerase OS=Arabidopsis thaliana GN=At5g28840 PE=1 SV=1	91.8	2.4e-40
TRINITY_DN17242_c1_g2	sp|Q93VR3|GME_ARATH	At5g28840	GDP-mannose 3,5-epimerase OS=Arabidopsis thaliana GN=At5g28840 PE=1 SV=1	93.9	5.6e-19
TRINITY_DN17243_c1_g3	sp|Q96558|UGDH1_SOYBN	UGD1	UDP-glucose 6-dehydrogenase 1 OS=Glycine max GN=UGD1 PE=2 SV=1	99.4	2.2e-280
TRINITY_DN17243_c1_g4	sp|Q2QS14|UGDH4_ORYSJ	UGD4	UDP-glucose 6-dehydrogenase 4 OS=Oryza sativa subsp. japonica GN=UGD4 PE=2 SV=1	93.2	2.9e-31
TRINITY_DN17243_c1_g5	sp|Q9AUV6|UGDH3_ORYSJ	UGD3	UDP-glucose 6-dehydrogenase 3 OS=Oryza sativa subsp. japonica GN=UGD3 PE=2 SV=1	100	1.3e-36
TRINITY_DN17243_c1_g6	sp|Q9AUV6|UGDH3_ORYSJ	UGD3	UDP-glucose 6-dehydrogenase 3 OS=Oryza sativa subsp. japonica GN=UGD3 PE=2 SV=1	100	3.2e-32
TRINITY_DN17243_c1_g7	sp|Q75GS4|UGDH1_ORYSJ	UGD1	UDP-glucose 6-dehydrogenase 1 OS=Oryza sativa subsp. japonica GN=UGD1 PE=3 SV=1	100	2.1e-16
TRINITY_DN17244_c0_g1	sp|Q5ZK88|PSPC1_CHICK	PSPC1	Paraspeckle component 1 OS=Gallus gallus GN=PSPC1 PE=2 SV=1	75.5	3.6e-61
TRINITY_DN17245_c0_g1	sp|O24454|UBP3_ARATH	UBP3	Ubiquitin carboxyl-terminal hydrolase 3 OS=Arabidopsis thaliana GN=UBP3 PE=1 SV=1	86.6	6.2e-179
TRINITY_DN17248_c0_g2	sp|B8AKX6|GLO1_ORYSI	GLO1	Peroxisomal (S)-2-hydroxy-acid oxidase GLO1 OS=Oryza sativa subsp. indica GN=GLO1 PE=3 SV=1	100	2.6e-204
TRINITY_DN17249_c0_g1	sp|Q940B0|RL183_ARATH	RPL18C	60S ribosomal protein L18-3 OS=Arabidopsis thaliana GN=RPL18C PE=2 SV=1	81.8	2.4e-81
TRINITY_DN17249_c0_g5	sp|P42791|RL182_ARATH	RPL18B	60S ribosomal protein L18-2 OS=Arabidopsis thaliana GN=RPL18B PE=1 SV=2	87.6	5.5e-90
TRINITY_DN17249_c0_g6	sp|O65729|RL18_CICAR	RPL18	60S ribosomal protein L18 (Fragment) OS=Cicer arietinum GN=RPL18 PE=2 SV=1	89.9	1.8e-27
TRINITY_DN17249_c0_g8	sp|P42791|RL182_ARATH	RPL18B	60S ribosomal protein L18-2 OS=Arabidopsis thaliana GN=RPL18B PE=1 SV=2	91	3.9e-30
TRINITY_DN17250_c0_g1	sp|Q41266|AOX2_SOYBN	AOX2	Ubiquinol oxidase 2, mitochondrial OS=Glycine max GN=AOX2 PE=1 SV=2	86.6	6.8e-133
TRINITY_DN17252_c0_g1	sp|Q7XZU3|SAC1_ARATH	SAC1	Phosphoinositide phosphatase SAC1 OS=Arabidopsis thaliana GN=SAC1 PE=1 SV=1	90	1.6e-25
TRINITY_DN17253_c0_g2	sp|Q944K2|OST48_ARATH	OST48	Dolichyl-diphosphooligosaccharide--protein glycosyltransferase 48 kDa subunit OS=Arabidopsis thaliana GN=OST48 PE=2 SV=1	68.3	8e-15
TRINITY_DN17256_c0_g1	sp|Q9SZN1|VATB2_ARATH	VHA-B2	V-type proton ATPase subunit B2 OS=Arabidopsis thaliana GN=VHA-B2 PE=1 SV=1	97.2	9e-74
TRINITY_DN17257_c0_g1	sp|Q9ZQX6|ETOL1_ARATH	EOL1	ETO1-like protein 1 OS=Arabidopsis thaliana GN=EOL1 PE=1 SV=1	69.4	0
TRINITY_DN17259_c1_g2	sp|F4HWF9|NSRB_ARATH	NSRB	Nuclear speckle RNA-binding protein B OS=Arabidopsis thaliana GN=NSRB PE=2 SV=1	43.8	1.3e-20
TRINITY_DN17259_c1_g3	sp|O22922|RU2B1_ARATH	U2B''	U2 small nuclear ribonucleoprotein B'' OS=Arabidopsis thaliana GN=U2B'' PE=1 SV=1	69.1	1.2e-78
TRINITY_DN17259_c1_g6	sp|Q8H1S6|RU2B2_ARATH	At1g06960	U2 small nuclear ribonucleoprotein B'' 2 OS=Arabidopsis thaliana GN=At1g06960 PE=1 SV=1	70.9	7.8e-88
TRINITY_DN17259_c1_g7	sp|B8AM21|RU2B_ORYSI	OsI_11177	U2 small nuclear ribonucleoprotein B'' OS=Oryza sativa subsp. indica GN=OsI_11177 PE=3 SV=1	73.4	3.9e-33
TRINITY_DN1725_c0_g1	sp|Q8C7K6|PCYXL_MOUSE	Pcyox1l	Prenylcysteine oxidase-like OS=Mus musculus GN=Pcyox1l PE=1 SV=1	61.4	2.4e-17
TRINITY_DN17261_c0_g1	sp|Q5R533|SERC3_PONAB	SERINC3	Serine incorporator 3 OS=Pongo abelii GN=SERINC3 PE=2 SV=1	30.7	1.4e-17
TRINITY_DN17261_c0_g2	sp|Q8K0E7|SERC2_MOUSE	Serinc2	Serine incorporator 2 OS=Mus musculus GN=Serinc2 PE=2 SV=1	46.2	9e-15
TRINITY_DN17262_c2_g1	sp|Q5N725|ALFC3_ORYSJ	FBA3	Fructose-bisphosphate aldolase 3, cytoplasmic OS=Oryza sativa subsp. japonica GN=FBA3 PE=2 SV=1	100	7.5e-60
TRINITY_DN17265_c0_g1	sp|Q9FF10|HPSE1_ARATH	At5g07830	Heparanase-like protein 1 OS=Arabidopsis thaliana GN=At5g07830 PE=2 SV=1	53.8	6.2e-29
TRINITY_DN17266_c0_g1	sp|P0CF74|LAC6_HUMAN	IGLC6	Ig lambda-6 chain C region OS=Homo sapiens GN=IGLC6 PE=4 SV=1	36.9	6.2e-12
TRINITY_DN17266_c1_g1	sp|P20767|LAC2_RAT	-	Ig lambda-2 chain C region OS=Rattus norvegicus PE=4 SV=1	32.4	2.3e-13
TRINITY_DN17266_c1_g2	sp|P20767|LAC2_RAT	-	Ig lambda-2 chain C region OS=Rattus norvegicus PE=4 SV=1	34	2.9e-13
TRINITY_DN17266_c1_g3	sp|P01839|KACB_RABIT	K-BAS	Ig kappa-b4 chain C region OS=Oryctolagus cuniculus GN=K-BAS PE=4 SV=1	41.1	7.8e-06
TRINITY_DN17267_c0_g1	sp|Q680C0|GDL62_ARATH	At4g10955	GDSL esterase/lipase At4g10955 OS=Arabidopsis thaliana GN=At4g10955 PE=2 SV=1	56.3	2.7e-116
TRINITY_DN17269_c0_g1	sp|O65743|RL24_CICAR	RPL24	60S ribosomal protein L24 OS=Cicer arietinum GN=RPL24 PE=2 SV=1	90.5	3e-57
TRINITY_DN17270_c0_g1	sp|Q8VXU6|DI194_ARATH	DI19-4	Protein DEHYDRATION-INDUCED 19 homolog 4 OS=Arabidopsis thaliana GN=DI19-4 PE=1 SV=1	37.8	6.5e-38
TRINITY_DN17272_c0_g1	sp|Q8L773|THO4A_ARATH	ALY1	THO complex subunit 4A OS=Arabidopsis thaliana GN=ALY1 PE=1 SV=1	50.9	4.7e-13
TRINITY_DN17273_c0_g2	sp|Q9ZQ85|EFM_ARATH	EFM	Myb family transcription factor EFM OS=Arabidopsis thaliana GN=EFM PE=1 SV=2	29.7	1.6e-12
TRINITY_DN17275_c0_g1	sp|B8BKI8|MCM2_ORYSI	OsI_36121	DNA replication licensing factor MCM2 OS=Oryza sativa subsp. indica GN=OsI_36121 PE=3 SV=1	78.8	0
TRINITY_DN17278_c0_g1	sp|Q05462|RL27_PEA	RPL27	60S ribosomal protein L27 OS=Pisum sativum GN=RPL27 PE=2 SV=1	89.5	2.2e-38
TRINITY_DN17278_c0_g2	sp|P51419|RL273_ARATH	RPL27C	60S ribosomal protein L27-3 OS=Arabidopsis thaliana GN=RPL27C PE=2 SV=2	80.6	5.3e-56
TRINITY_DN17280_c0_g3	sp|Q99020|ROAA_MOUSE	Hnrnpab	Heterogeneous nuclear ribonucleoprotein A/B OS=Mus musculus GN=Hnrnpab PE=1 SV=1	84.2	2.9e-86
TRINITY_DN17280_c0_g5	sp|Q99020|ROAA_MOUSE	Hnrnpab	Heterogeneous nuclear ribonucleoprotein A/B OS=Mus musculus GN=Hnrnpab PE=1 SV=1	83	6.2e-86
TRINITY_DN17281_c0_g1	sp|Q8GWP0|MYB39_ARATH	MYB39	Transcription factor MYB39 OS=Arabidopsis thaliana GN=MYB39 PE=2 SV=1	57.7	9.9e-58
TRINITY_DN17282_c0_g8	sp|Q8GT75|NIP1_ARATH	NIP1	NEP1-interacting protein 1 OS=Arabidopsis thaliana GN=NIP1 PE=1 SV=2	42.5	1.1e-24
TRINITY_DN17282_c0_g9	sp|O24554|PLY_ZINVI	-	Pectate lyase OS=Zinnia violacea PE=1 SV=1	75.7	2.3e-47
TRINITY_DN17283_c0_g2	sp|P54609|CD48A_ARATH	CDC48A	Cell division control protein 48 homolog A OS=Arabidopsis thaliana GN=CDC48A PE=1 SV=1	100	4.2e-35
TRINITY_DN17283_c1_g1	sp|P54609|CD48A_ARATH	CDC48A	Cell division control protein 48 homolog A OS=Arabidopsis thaliana GN=CDC48A PE=1 SV=1	94	8.4e-35
TRINITY_DN17283_c1_g2	sp|O22993|FTSI1_ARATH	FTSHI1	Probable inactive ATP-dependent zinc metalloprotease FTSHI 1, chloroplastic OS=Arabidopsis thaliana GN=FTSHI1 PE=1 SV=1	68.4	0
TRINITY_DN17284_c0_g1	sp|Q8GWQ2|AHL20_ARATH	AHL20	AT-hook motif nuclear-localized protein 20 OS=Arabidopsis thaliana GN=AHL20 PE=2 SV=1	51.2	5.3e-69
TRINITY_DN17290_c0_g1	sp|B0F9L4|GOGC6_ARATH	GC6	Golgin candidate 6 OS=Arabidopsis thaliana GN=GC6 PE=1 SV=2	76.5	8.9e-28
TRINITY_DN17291_c4_g1	sp|Q8VZG8|MIK2_ARATH	MIK2	MDIS1-interacting receptor like kinase 2 OS=Arabidopsis thaliana GN=MIK2 PE=1 SV=3	48.6	7e-27
TRINITY_DN17293_c0_g1	sp|Q8GWK7|BEE3_ARATH	BEE3	Transcription factor BEE 3 OS=Arabidopsis thaliana GN=BEE3 PE=2 SV=1	41.1	1.2e-35
TRINITY_DN17296_c0_g1	sp|Q94II3|PMTL_ARATH	ERD3	Probable methyltransferase PMT21 OS=Arabidopsis thaliana GN=ERD3 PE=2 SV=1	73.7	6e-101
TRINITY_DN17297_c0_g1	sp|Q8L999|BPC6_ARATH	BPC6	Protein BASIC PENTACYSTEINE6 OS=Arabidopsis thaliana GN=BPC6 PE=1 SV=1	48.4	8.9e-46
TRINITY_DN17297_c0_g6	sp|Q54R62|UCKC_DICDI	udkC	Uridine-cytidine kinase C OS=Dictyostelium discoideum GN=udkC PE=3 SV=1	50.2	1.7e-79
TRINITY_DN17298_c0_g1	sp|A7LXU3|BGH3B_BACO1	BACOVA_02659	Beta-glucosidase BoGH3B OS=Bacteroides ovatus (strain ATCC 8483 / DSM 1896 / JCM 5824 / NCTC 11153) GN=BACOVA_02659 PE=1 SV=1	31.5	2.8e-80
TRINITY_DN17300_c0_g1	sp|Q9NQ29|LUC7L_HUMAN	LUC7L	Putative RNA-binding protein Luc7-like 1 OS=Homo sapiens GN=LUC7L PE=1 SV=1	31.1	1.2e-10
TRINITY_DN17301_c1_g3	sp|O81832|Y4729_ARATH	At4g27290	G-type lectin S-receptor-like serine/threonine-protein kinase At4g27290 OS=Arabidopsis thaliana GN=At4g27290 PE=3 SV=4	59.2	4.6e-62
TRINITY_DN17303_c0_g1	sp|P26987|SAM22_SOYBN	-	Stress-induced protein SAM22 OS=Glycine max PE=1 SV=1	82.3	3.1e-72
TRINITY_DN17306_c0_g1	sp|P48534|APX1_PEA	APX1	L-ascorbate peroxidase, cytosolic OS=Pisum sativum GN=APX1 PE=1 SV=2	90.8	1.1e-132
TRINITY_DN17308_c0_g1	sp|Q9LJK2|ABAH4_ARATH	CYP707A4	Abscisic acid 8'-hydroxylase 4 OS=Arabidopsis thaliana GN=CYP707A4 PE=2 SV=2	67.2	2.7e-187
TRINITY_DN17310_c1_g2	sp|Q6P0V6|RL8_DANRE	rpl8	60S ribosomal protein L8 OS=Danio rerio GN=rpl8 PE=2 SV=3	100	1.7e-130
TRINITY_DN17310_c1_g4	sp|Q9XVF7|RL8_CAEEL	rpl-8	60S ribosomal protein L8 OS=Caenorhabditis elegans GN=rpl-8 PE=3 SV=1	74	3.4e-30
TRINITY_DN17313_c0_g1	sp|Q9LJG8|ASIL2_ARATH	ASIL2	Trihelix transcription factor ASIL2 OS=Arabidopsis thaliana GN=ASIL2 PE=2 SV=1	45.7	1.2e-17
TRINITY_DN17316_c0_g3	sp|Q8LFH7|RL371_ARATH	RPL37A	60S ribosomal protein L37-1 OS=Arabidopsis thaliana GN=RPL37A PE=3 SV=1	81.9	3.6e-40
TRINITY_DN17317_c0_g1	sp|P49397|RS3A_ORYSJ	RPS3A	40S ribosomal protein S3a OS=Oryza sativa subsp. japonica GN=RPS3A PE=2 SV=2	100	7.8e-145
TRINITY_DN17317_c0_g3	sp|P49397|RS3A_ORYSJ	RPS3A	40S ribosomal protein S3a OS=Oryza sativa subsp. japonica GN=RPS3A PE=2 SV=2	94	1e-40
TRINITY_DN17318_c0_g1	sp|Q5NB11|CHI10_ORYSJ	Cht10	Chitinase 10 OS=Oryza sativa subsp. japonica GN=Cht10 PE=2 SV=1	70.2	4.3e-109
TRINITY_DN17320_c0_g1	sp|Q90YQ0|RS24_ICTPU	rps24	40S ribosomal protein S24 OS=Ictalurus punctatus GN=rps24 PE=2 SV=1	93.9	1.1e-52
TRINITY_DN17320_c0_g2	sp|Q56JU9|RS24_BOVIN	RPS24	40S ribosomal protein S24 OS=Bos taurus GN=RPS24 PE=2 SV=2	100	1.9e-59
TRINITY_DN17321_c0_g1	sp|Q9SFC6|GDIR_ARATH	GDI1	Rho GDP-dissociation inhibitor 1 OS=Arabidopsis thaliana GN=GDI1 PE=1 SV=1	78	5.9e-78
TRINITY_DN17322_c0_g2	sp|Q7ZWJ4|RL18A_DANRE	rpl18a	60S ribosomal protein L18a OS=Danio rerio GN=rpl18a PE=2 SV=1	97.7	5.8e-94
TRINITY_DN17322_c0_g3	sp|Q3T003|RL18A_BOVIN	RPL18A	60S ribosomal protein L18a OS=Bos taurus GN=RPL18A PE=2 SV=1	100	1.4e-95
TRINITY_DN17325_c0_g1	sp|Q76I81|RS12_BOVIN	RPS12	40S ribosomal protein S12 OS=Bos taurus GN=RPS12 PE=2 SV=1	97	7.1e-69
TRINITY_DN17328_c0_g3	sp|O48947|CESA2_ARATH	CESA2	Cellulose synthase A catalytic subunit 2 [UDP-forming] OS=Arabidopsis thaliana GN=CESA2 PE=1 SV=1	78.8	7.8e-243
TRINITY_DN17330_c0_g1	sp|Q02020|FIBB_CHICK	FGB	Fibrinogen beta chain (Fragment) OS=Gallus gallus GN=FGB PE=1 SV=1	40.9	2.4e-20
TRINITY_DN17333_c2_g14	sp|Q66GR8|NET3A_ARATH	NET3A	Protein NETWORKED 3A OS=Arabidopsis thaliana GN=NET3A PE=2 SV=1	67.4	4.7e-27
TRINITY_DN17333_c2_g15	sp|Q9LET3|RBL20_ARATH	RBL20	Rhomboid-like protein 20 OS=Arabidopsis thaliana GN=RBL20 PE=2 SV=1	68.9	3.3e-113
TRINITY_DN17333_c2_g2	sp|Q8L850|PI5K9_ARATH	PIP5K9	Phosphatidylinositol 4-phosphate 5-kinase 9 OS=Arabidopsis thaliana GN=PIP5K9 PE=1 SV=2	76.9	2.5e-32
TRINITY_DN17334_c1_g1	sp|Q9ZSK5|ZOG_PHALU	ZOG1	Zeatin O-glucosyltransferase OS=Phaseolus lunatus GN=ZOG1 PE=2 SV=1	44.8	1.9e-17
TRINITY_DN17337_c0_g1	sp|Q9SNC3|FLA4_ARATH	FLA4	Fasciclin-like arabinogalactan protein 4 OS=Arabidopsis thaliana GN=FLA4 PE=1 SV=1	46.6	1.4e-87
TRINITY_DN17344_c0_g1	sp|P42749|UBC5_ARATH	UBC5	Ubiquitin-conjugating enzyme E2 5 OS=Arabidopsis thaliana GN=UBC5 PE=2 SV=2	63.6	1.6e-17
TRINITY_DN17344_c0_g2	sp|P16577|UBC4_WHEAT	UBC4	Ubiquitin-conjugating enzyme E2-23 kDa OS=Triticum aestivum GN=UBC4 PE=1 SV=1	69.4	6.7e-23
TRINITY_DN17346_c0_g1	sp|Q8VZB2|HACD_ARATH	PAS2	Very-long-chain (3R)-3-hydroxyacyl-CoA dehydratase PASTICCINO 2 OS=Arabidopsis thaliana GN=PAS2 PE=1 SV=1	73.1	3e-92
TRINITY_DN17347_c0_g1	sp|P47904|RS27_XENLA	rps27	40S ribosomal protein S27 OS=Xenopus laevis GN=rps27 PE=3 SV=2	98.8	3.9e-44
TRINITY_DN17347_c0_g2	sp|P47904|RS27_XENLA	rps27	40S ribosomal protein S27 OS=Xenopus laevis GN=rps27 PE=3 SV=2	96.4	2e-43
TRINITY_DN17347_c0_g3	sp|P47904|RS27_XENLA	rps27	40S ribosomal protein S27 OS=Xenopus laevis GN=rps27 PE=3 SV=2	89.3	1.5e-38
TRINITY_DN17348_c0_g1	sp|P25489|AT1A1_CATCO	atp1a1	Sodium/potassium-transporting ATPase subunit alpha-1 OS=Catostomus commersonii GN=atp1a1 PE=2 SV=1	95	7.6e-129
TRINITY_DN17353_c1_g4	sp|Q8VZU3|SCP19_ARATH	SCPL19	Serine carboxypeptidase-like 19 OS=Arabidopsis thaliana GN=SCPL19 PE=1 SV=1	51.6	6.5e-23
TRINITY_DN17358_c0_g1	sp|Q9S9Z7|P2C10_ARATH	At1g34750	Probable protein phosphatase 2C 10 OS=Arabidopsis thaliana GN=At1g34750 PE=2 SV=1	74.2	4.9e-73
TRINITY_DN17361_c0_g2	sp|Q8S9K3|VAR3_ARATH	VAR3	Zinc finger protein VAR3, chloroplastic OS=Arabidopsis thaliana GN=VAR3 PE=1 SV=2	41.2	8.2e-124
TRINITY_DN17362_c0_g1	sp|I7C6E8|C7A52_PANGI	-	Beta-amyrin 28-oxidase OS=Panax ginseng PE=2 SV=1	60.2	8.1e-168
TRINITY_DN17363_c0_g2	sp|Q8LE10|HA22I_ARATH	HVA22I	HVA22-like protein i OS=Arabidopsis thaliana GN=HVA22I PE=2 SV=2	85.5	1.1e-75
TRINITY_DN17367_c0_g1	sp|Q41048|PSBQ1_MAIZE	PSBQ1	Oxygen-evolving enhancer protein 3-1, chloroplastic OS=Zea mays GN=PSBQ1 PE=2 SV=1	81.2	7.6e-33
TRINITY_DN17367_c1_g1	sp|Q2V3R1|FB346_ARATH	At3g44326	F-box protein At3g44326 OS=Arabidopsis thaliana GN=At3g44326 PE=2 SV=1	35.9	1.9e-44
TRINITY_DN17368_c0_g2	sp|Q9C7F9|MT127_ARATH	At1g27930	Probable methyltransferase At1g27930 OS=Arabidopsis thaliana GN=At1g27930 PE=1 SV=1	55.8	1.3e-83
TRINITY_DN17373_c0_g1	sp|Q9FJ10|GAT16_ARATH	GATA16	GATA transcription factor 16 OS=Arabidopsis thaliana GN=GATA16 PE=2 SV=1	56.7	1.3e-12
TRINITY_DN17374_c0_g8	sp|P22778|ATPO_IPOBA	-	ATP synthase subunit O, mitochondrial OS=Ipomoea batatas PE=1 SV=1	73.6	3.6e-38
TRINITY_DN17376_c0_g1	sp|Q9C9G4|ENDO2_ARATH	ENDO2	Endonuclease 2 OS=Arabidopsis thaliana GN=ENDO2 PE=1 SV=1	67.8	2.1e-115
TRINITY_DN17376_c0_g3	sp|Q8W583|ALT3_ARATH	ALT3	Acyl-acyl carrier protein thioesterase ATL3, chloroplastic OS=Arabidopsis thaliana GN=ALT3 PE=2 SV=1	67.5	1.4e-64
TRINITY_DN17380_c0_g1	sp|Q9MAB3|NOP5B_ARATH	NOP5-2	Probable nucleolar protein 5-2 OS=Arabidopsis thaliana GN=NOP5-2 PE=1 SV=1	86.4	2.1e-85
TRINITY_DN17380_c0_g3	sp|Q9MAB3|NOP5B_ARATH	NOP5-2	Probable nucleolar protein 5-2 OS=Arabidopsis thaliana GN=NOP5-2 PE=1 SV=1	81.6	1e-46
TRINITY_DN17380_c1_g1	sp|Q9M209|CER7_ARATH	RRP45B	Exosome complex component RRP45B OS=Arabidopsis thaliana GN=RRP45B PE=2 SV=1	50.4	1.9e-83
TRINITY_DN17383_c0_g1	sp|Q680K8|Y1576_ARATH	At1g55760	BTB/POZ domain-containing protein At1g55760 OS=Arabidopsis thaliana GN=At1g55760 PE=2 SV=1	72.1	8.6e-135
TRINITY_DN17388_c0_g1	sp|Q9SR72|GL32_ARATH	At3g10080	Germin-like protein subfamily 3 member 2 OS=Arabidopsis thaliana GN=At3g10080 PE=2 SV=1	62.1	1.4e-61
TRINITY_DN17389_c0_g1	sp|F4K5J1|MYO17_ARATH	XI-K	Myosin-17 OS=Arabidopsis thaliana GN=XI-K PE=1 SV=2	82.8	1.1e-21
TRINITY_DN17390_c0_g1	sp|Q39962|CBPR_HEVBR	CBP	Citrate-binding protein OS=Hevea brasiliensis GN=CBP PE=1 SV=1	50.8	2.6e-55
TRINITY_DN17391_c0_g1	sp|Q9C7Z9|SCP18_ARATH	SCPL18	Serine carboxypeptidase-like 18 OS=Arabidopsis thaliana GN=SCPL18 PE=2 SV=2	52.5	9.7e-137
TRINITY_DN17392_c0_g1	sp|O22969|Y2416_ARATH	At2g34160	Uncharacterized protein At2g34160 OS=Arabidopsis thaliana GN=At2g34160 PE=1 SV=1	72.7	7.4e-42
TRINITY_DN17392_c1_g4	sp|O22969|Y2416_ARATH	At2g34160	Uncharacterized protein At2g34160 OS=Arabidopsis thaliana GN=At2g34160 PE=1 SV=1	78.7	4.4e-29
TRINITY_DN17393_c0_g2	sp|Q38799|ODPB1_ARATH	PDH2	Pyruvate dehydrogenase E1 component subunit beta-1, mitochondrial OS=Arabidopsis thaliana GN=PDH2 PE=1 SV=2	92.4	3.9e-66
TRINITY_DN17393_c1_g1	sp|Q6Z1G7|ODPB1_ORYSJ	Os08g0536000	Pyruvate dehydrogenase E1 component subunit beta-1, mitochondrial OS=Oryza sativa subsp. japonica GN=Os08g0536000 PE=2 SV=1	83.9	2.4e-35
TRINITY_DN17394_c0_g1	sp|Q9SVD7|UEV1D_ARATH	UEV1D	Ubiquitin-conjugating enzyme E2 variant 1D OS=Arabidopsis thaliana GN=UEV1D PE=1 SV=1	95.3	1.1e-70
TRINITY_DN17398_c0_g3	sp|Q8LF05|RBL19_ARATH	RBL19	Rhomboid-like protein 19 OS=Arabidopsis thaliana GN=RBL19 PE=2 SV=1	55	3.3e-107
TRINITY_DN17402_c1_g1	sp|Q9T072|BH025_ARATH	BHLH25	Transcription factor bHLH25 OS=Arabidopsis thaliana GN=BHLH25 PE=2 SV=2	49.1	5.7e-29
TRINITY_DN17402_c1_g2	sp|Q9FHA6|RLF34_ARATH	RALFL34	Protein RALF-like 34 OS=Arabidopsis thaliana GN=RALFL34 PE=2 SV=1	51.1	4.9e-26
TRINITY_DN17402_c1_g3	sp|Q9LW68|LSH4_ARATH	LSH4	Protein LIGHT-DEPENDENT SHORT HYPOCOTYLS 4 OS=Arabidopsis thaliana GN=LSH4 PE=1 SV=1	85	1.4e-59
TRINITY_DN17403_c0_g1	sp|Q8RWY4|NLP6_ARATH	NLP6	Protein NLP6 OS=Arabidopsis thaliana GN=NLP6 PE=2 SV=2	26.4	9.9e-06
TRINITY_DN17404_c0_g1	sp|Q54TM7|DRKD_DICDI	drkD	Probable serine/threonine-protein kinase drkD OS=Dictyostelium discoideum GN=drkD PE=2 SV=1	44.5	1.9e-24
TRINITY_DN17405_c0_g1	sp|P02794|FRIH_HUMAN	FTH1	Ferritin heavy chain OS=Homo sapiens GN=FTH1 PE=1 SV=2	100	6.4e-103
TRINITY_DN17405_c0_g2	sp|P49946|FRIH_SALSA	-	Ferritin, heavy subunit OS=Salmo salar PE=2 SV=1	89.3	4.3e-88
TRINITY_DN17406_c0_g3	sp|Q9SLL2|BIG1B_ARATH	At1g54200	Protein BIG GRAIN 1-like B OS=Arabidopsis thaliana GN=At1g54200 PE=2 SV=1	36.1	6.4e-23
TRINITY_DN17409_c0_g1	sp|Q58CQ5|ANKZ1_BOVIN	ANKZF1	Ankyrin repeat and zinc finger domain-containing protein 1 OS=Bos taurus GN=ANKZF1 PE=2 SV=2	36.6	1.3e-38
TRINITY_DN17410_c1_g4	sp|Q5KR61|PIGV_RAT	Pigv	GPI mannosyltransferase 2 OS=Rattus norvegicus GN=Pigv PE=2 SV=1	25.1	7e-31
TRINITY_DN17411_c0_g1	sp|Q9M3H5|HMA1_ARATH	HMA1	Probable cadmium/zinc-transporting ATPase HMA1, chloroplastic OS=Arabidopsis thaliana GN=HMA1 PE=2 SV=2	72	5e-245
TRINITY_DN17411_c0_g2	sp|Q9M3H5|HMA1_ARATH	HMA1	Probable cadmium/zinc-transporting ATPase HMA1, chloroplastic OS=Arabidopsis thaliana GN=HMA1 PE=2 SV=2	67.3	3e-32
TRINITY_DN17412_c0_g3	sp|P35134|UBC11_ARATH	UBC11	Ubiquitin-conjugating enzyme E2 11 OS=Arabidopsis thaliana GN=UBC11 PE=1 SV=2	91.3	5.1e-20
TRINITY_DN17412_c0_g4	sp|P35135|UBC4_SOLLC	-	Ubiquitin-conjugating enzyme E2-17 kDa OS=Solanum lycopersicum PE=2 SV=1	96.2	2.2e-40
TRINITY_DN17414_c0_g1	sp|Q9ZR07|FRDA_ARATH	FH	Frataxin, mitochondrial OS=Arabidopsis thaliana GN=FH PE=1 SV=2	75.9	8.9e-47
TRINITY_DN17414_c0_g2	sp|Q9ZR07|FRDA_ARATH	FH	Frataxin, mitochondrial OS=Arabidopsis thaliana GN=FH PE=1 SV=2	72.7	2.9e-48
TRINITY_DN17415_c0_g1	sp|Q9LF79|ACA8_ARATH	ACA8	Calcium-transporting ATPase 8, plasma membrane-type OS=Arabidopsis thaliana GN=ACA8 PE=1 SV=1	64.9	5.4e-35
TRINITY_DN17415_c0_g2	sp|Q9SZR1|ACA10_ARATH	ACA10	Calcium-transporting ATPase 10, plasma membrane-type OS=Arabidopsis thaliana GN=ACA10 PE=1 SV=2	58.5	3.9e-27
TRINITY_DN17416_c0_g1	sp|P91268|PGAL_CAEEL	pgal-1	Probable peptidyl-alpha-hydroxyglycine alpha-amidating lyase pgal-1 OS=Caenorhabditis elegans GN=pgal-1 PE=1 SV=2	43	1.1e-09
TRINITY_DN17417_c0_g1	sp|Q9XI60|LPP2_ARATH	LPP2	Lipid phosphate phosphatase 2 OS=Arabidopsis thaliana GN=LPP2 PE=2 SV=1	71.4	4.2e-64
TRINITY_DN17418_c0_g1	sp|Q9LRN8|RK3B_ARATH	RPL3B	50S ribosomal protein L3-2, chloroplastic OS=Arabidopsis thaliana GN=RPL3B PE=2 SV=1	80.2	1.1e-43
TRINITY_DN17419_c0_g1	sp|P62785|H41_WHEAT	-	Histone H4 variant TH011 OS=Triticum aestivum PE=3 SV=2	100	2.7e-33
TRINITY_DN17419_c1_g3	sp|P42774|GBF1_ARATH	GBF1	G-box-binding factor 1 OS=Arabidopsis thaliana GN=GBF1 PE=1 SV=2	44.3	3.9e-25
TRINITY_DN17421_c0_g1	sp|O65268|TASP1_ARATH	At4g00590	Putative threonine aspartase OS=Arabidopsis thaliana GN=At4g00590 PE=2 SV=3	37.1	1.6e-68
TRINITY_DN17421_c0_g2	sp|O65268|TASP1_ARATH	At4g00590	Putative threonine aspartase OS=Arabidopsis thaliana GN=At4g00590 PE=2 SV=3	72.6	2.9e-38
TRINITY_DN17422_c1_g1	sp|O22584|RS14_LUPLU	RPS14	40S ribosomal protein S14 OS=Lupinus luteus GN=RPS14 PE=2 SV=1	95.2	1e-49
TRINITY_DN17422_c1_g3	sp|P62265|RS14_CRIGR	RPS14	40S ribosomal protein S14 OS=Cricetulus griseus GN=RPS14 PE=2 SV=3	100	3.5e-80
TRINITY_DN17422_c1_g5	sp|P62265|RS14_CRIGR	RPS14	40S ribosomal protein S14 OS=Cricetulus griseus GN=RPS14 PE=2 SV=3	100	5.1e-75
TRINITY_DN17424_c0_g1	sp|Q9LU89|2A5N_ARATH	B'ETA	Serine/threonine protein phosphatase 2A 59 kDa regulatory subunit B' eta isoform OS=Arabidopsis thaliana GN=B'ETA PE=2 SV=1	81.9	1.3e-204
TRINITY_DN17426_c0_g1	sp|Q9FMR9|RIN1_ARATH	RIN1	RuvB-like protein 1 OS=Arabidopsis thaliana GN=RIN1 PE=1 SV=1	88.2	4.5e-227
TRINITY_DN17427_c0_g1	sp|P31251|UBE12_WHEAT	UBA2	Ubiquitin-activating enzyme E1 2 OS=Triticum aestivum GN=UBA2 PE=2 SV=1	77	8.6e-118
TRINITY_DN17428_c0_g1	sp|Q9ZPQ3|GEK1_ARATH	GEK1	D-aminoacyl-tRNA deacylase OS=Arabidopsis thaliana GN=GEK1 PE=1 SV=2	70.6	1.6e-27
TRINITY_DN17428_c0_g2	sp|Q9ZPQ3|GEK1_ARATH	GEK1	D-aminoacyl-tRNA deacylase OS=Arabidopsis thaliana GN=GEK1 PE=1 SV=2	38.6	1.2e-37
TRINITY_DN17429_c1_g2	sp|P29677|MPPA_SOLTU	MPP	Mitochondrial-processing peptidase subunit alpha OS=Solanum tuberosum GN=MPP PE=1 SV=1	64.6	2.7e-118
TRINITY_DN17430_c0_g5	sp|Q8GXF8|SHGR9_ARATH	SGR9	E3 ubiquitin-protein ligase SGR9, amyloplastic OS=Arabidopsis thaliana GN=SGR9 PE=1 SV=1	43.2	6.6e-56
TRINITY_DN17434_c0_g1	sp|Q90YS2|RS3_ICTPU	rps3	40S ribosomal protein S3 OS=Ictalurus punctatus GN=rps3 PE=2 SV=1	98.8	9.2e-133
TRINITY_DN17435_c0_g1	sp|P74516|TRML_SYNY3	slr0992	Putative tRNA (cytidine(34)-2'-O)-methyltransferase OS=Synechocystis sp. (strain PCC 6803 / Kazusa) GN=slr0992 PE=3 SV=1	50.3	9.6e-34
TRINITY_DN17437_c0_g3	sp|Q9S7E9|GGT2_ARATH	GGAT2	Glutamate--glyoxylate aminotransferase 2 OS=Arabidopsis thaliana GN=GGAT2 PE=1 SV=1	85.8	6.5e-251
TRINITY_DN17438_c0_g1	sp|Q3UFD7|FFAR3_MOUSE	Ffar3	Free fatty acid receptor 3 OS=Mus musculus GN=Ffar3 PE=1 SV=1	48.6	1.5e-70
TRINITY_DN17449_c0_g3	sp|P42322|CANB1_NAEGR	CNB1	Calcineurin subunit B OS=Naegleria gruberi GN=CNB1 PE=3 SV=1	37.3	9e-28
TRINITY_DN17449_c0_g5	sp|Q6Z0E2|CCC1_ORYSJ	CCC1	Cation-chloride cotransporter 1 OS=Oryza sativa subsp. japonica GN=CCC1 PE=2 SV=1	69.1	2.2e-20
TRINITY_DN1744_c0_g1	sp|P03891|NU2M_HUMAN	MT-ND2	NADH-ubiquinone oxidoreductase chain 2 OS=Homo sapiens GN=MT-ND2 PE=1 SV=2	91.2	1.2e-105
TRINITY_DN17450_c1_g2	sp|O81832|Y4729_ARATH	At4g27290	G-type lectin S-receptor-like serine/threonine-protein kinase At4g27290 OS=Arabidopsis thaliana GN=At4g27290 PE=3 SV=4	50.6	2.4e-10
TRINITY_DN17451_c3_g1	sp|P46266|1433_PEA	-	14-3-3-like protein OS=Pisum sativum PE=2 SV=1	89	1.9e-123
TRINITY_DN17451_c3_g2	sp|O65352|1433_HELAN	-	14-3-3-like protein OS=Helianthus annuus PE=2 SV=1	89	3.5e-84
TRINITY_DN17451_c3_g5	sp|Q6UFZ9|143B1_ONCMY	-	14-3-3 protein beta/alpha-1 OS=Oncorhynchus mykiss PE=2 SV=1	91	3.3e-34
TRINITY_DN17452_c1_g3	sp|O24339|CATA_SOLAP	-	Catalase OS=Soldanella alpina PE=2 SV=1	92.7	1.1e-288
TRINITY_DN17453_c0_g2	sp|Q9LYP1|RBL3_ARATH	RBL3	RHOMBOID-like protein 3 OS=Arabidopsis thaliana GN=RBL3 PE=2 SV=1	63.6	2.1e-85
TRINITY_DN17454_c1_g2	sp|Q9FLZ8|EDL2_ARATH	EDL2	EID1-like F-box protein 2 OS=Arabidopsis thaliana GN=EDL2 PE=2 SV=1	78.3	7.7e-122
TRINITY_DN17454_c1_g7	sp|Q9FLZ8|EDL2_ARATH	EDL2	EID1-like F-box protein 2 OS=Arabidopsis thaliana GN=EDL2 PE=2 SV=1	78.7	2.5e-121
TRINITY_DN17457_c2_g1	sp|Q9FXA2|PABP8_ARATH	PAB8	Polyadenylate-binding protein 8 OS=Arabidopsis thaliana GN=PAB8 PE=1 SV=1	59.7	4.2e-199
TRINITY_DN17459_c0_g1	sp|Q9C5C8|MSRB2_ARATH	MSRB2	Peptide methionine sulfoxide reductase B2, chloroplastic OS=Arabidopsis thaliana GN=MSRB2 PE=1 SV=1	89.1	4.4e-54
TRINITY_DN17462_c0_g1	sp|Q9LZD8|U89A2_ARATH	UGT89A2	UDP-glycosyltransferase 89A2 OS=Arabidopsis thaliana GN=UGT89A2 PE=2 SV=1	49.8	3.9e-124
TRINITY_DN17464_c0_g1	sp|Q9SD33|U183_ARATH	At3g51130	UPF0183 protein At3g51130 OS=Arabidopsis thaliana GN=At3g51130 PE=2 SV=2	81.6	4.9e-203
TRINITY_DN17466_c0_g1	sp|F4IXJ7|MED6_ARATH	MED6	Mediator of RNA polymerase II transcription subunit 6 OS=Arabidopsis thaliana GN=MED6 PE=1 SV=1	53.5	9.3e-44
TRINITY_DN17467_c0_g1	sp|Q42463|DCL_SOLLC	DCL	Protein DCL, chloroplastic OS=Solanum lycopersicum GN=DCL PE=2 SV=1	38.8	1.1e-29
TRINITY_DN17474_c0_g1	sp|P93324|CHOMT_MEDSA	-	Isoliquiritigenin 2'-O-methyltransferase OS=Medicago sativa PE=1 SV=1	57.1	2.8e-25
TRINITY_DN17475_c0_g1	sp|Q9SSE9|JMJ25_ARATH	JMJ25	Lysine-specific demethylase JMJ25 OS=Arabidopsis thaliana GN=JMJ25 PE=1 SV=1	31.2	2.5e-85
TRINITY_DN17476_c0_g1	sp|Q9SKU6|PP166_ARATH	At2g20710	Pentatricopeptide repeat-containing protein At2g20710, mitochondrial OS=Arabidopsis thaliana GN=At2g20710 PE=2 SV=1	34.9	1.9e-73
TRINITY_DN17477_c0_g1	sp|Q93ZB6|DCUP1_ARATH	HEME1	Uroporphyrinogen decarboxylase 1, chloroplastic OS=Arabidopsis thaliana GN=HEME1 PE=2 SV=2	79	4.4e-176
TRINITY_DN17480_c0_g2	sp|Q43433|VATB2_GOSHI	-	V-type proton ATPase subunit B 2 (Fragment) OS=Gossypium hirsutum PE=2 SV=1	93.9	5.2e-12
TRINITY_DN17480_c0_g5	sp|Q43432|VATB1_GOSHI	-	V-type proton ATPase subunit B 1 OS=Gossypium hirsutum PE=2 SV=1	95.8	3.8e-113
TRINITY_DN17480_c0_g7	sp|Q9SZN1|VATB2_ARATH	VHA-B2	V-type proton ATPase subunit B2 OS=Arabidopsis thaliana GN=VHA-B2 PE=1 SV=1	99.3	4.8e-75
TRINITY_DN17485_c0_g1	sp|A2WQG7|H2A5_ORYSI	OsI_002060	Probable histone H2A.5 OS=Oryza sativa subsp. indica GN=OsI_002060 PE=3 SV=1	100	1.8e-60
TRINITY_DN17488_c0_g1	sp|Q9SIP1|UP3_ARATH	UP3	Stress-response A/B barrel domain-containing protein UP3 OS=Arabidopsis thaliana GN=UP3 PE=2 SV=1	48.2	2e-57
TRINITY_DN17491_c0_g2	sp|P34743|BTG1_CHICK	BTG1	Protein BTG1 OS=Gallus gallus GN=BTG1 PE=2 SV=1	72.3	3.4e-29
TRINITY_DN17491_c0_g6	sp|Q38954|PHT21_ARATH	PHT2-1	Inorganic phosphate transporter 2-1, chloroplastic OS=Arabidopsis thaliana GN=PHT2-1 PE=1 SV=1	80	1.6e-30
TRINITY_DN17492_c0_g1	sp|Q8RWV3|CCL11_ARATH	CYCL1-1	Cyclin-L1-1 OS=Arabidopsis thaliana GN=CYCL1-1 PE=1 SV=2	72.5	5.8e-133
TRINITY_DN17494_c2_g3	sp|O81832|Y4729_ARATH	At4g27290	G-type lectin S-receptor-like serine/threonine-protein kinase At4g27290 OS=Arabidopsis thaliana GN=At4g27290 PE=3 SV=4	42.9	3.1e-12
TRINITY_DN17496_c0_g1	sp|Q54CU7|TPC2L_DICDI	trappc2l	Trafficking protein particle complex subunit 2-like protein OS=Dictyostelium discoideum GN=trappc2l PE=3 SV=1	46.5	5.1e-30
TRINITY_DN17497_c0_g1	sp|O82139|CAS1_PANGI	OSCPNX1	Cycloartenol Synthase OS=Panax ginseng GN=OSCPNX1 PE=1 SV=1	83.5	6.2e-45
TRINITY_DN17498_c0_g1	sp|P26373|RL13_HUMAN	RPL13	60S ribosomal protein L13 OS=Homo sapiens GN=RPL13 PE=1 SV=4	100	7.1e-63
TRINITY_DN17498_c0_g2	sp|Q90Z10|RL13_DANRE	rpl13	60S ribosomal protein L13 OS=Danio rerio GN=rpl13 PE=2 SV=3	100	2.4e-84
TRINITY_DN17498_c0_g3	sp|Q90Z10|RL13_DANRE	rpl13	60S ribosomal protein L13 OS=Danio rerio GN=rpl13 PE=2 SV=3	93.5	1e-97
TRINITY_DN17500_c0_g1	sp|Q9ZT71|STA1_ARATH	STA1	Protein STABILIZED1 OS=Arabidopsis thaliana GN=STA1 PE=1 SV=1	71.1	7.3e-43
TRINITY_DN17501_c0_g4	sp|Q91W50|CSDE1_MOUSE	Csde1	Cold shock domain-containing protein E1 OS=Mus musculus GN=Csde1 PE=1 SV=1	74	9.6e-38
TRINITY_DN17501_c0_g6	sp|Q91W50|CSDE1_MOUSE	Csde1	Cold shock domain-containing protein E1 OS=Mus musculus GN=Csde1 PE=1 SV=1	86.5	3.6e-39
TRINITY_DN17502_c0_g1	sp|A9LNK9|CPSF_ARATH	CPSF30	30-kDa cleavage and polyadenylation specificity factor 30 OS=Arabidopsis thaliana GN=CPSF30 PE=1 SV=1	63.2	3.9e-185
TRINITY_DN17502_c0_g5	sp|Q9ASR1|EF2_ARATH	LOS1	Elongation factor 2 OS=Arabidopsis thaliana GN=LOS1 PE=1 SV=1	93.7	4.1e-289
TRINITY_DN17508_c0_g1	sp|O64728|STI_ARATH	STI	Protein STICHEL OS=Arabidopsis thaliana GN=STI PE=1 SV=2	38.1	4.7e-60
TRINITY_DN17508_c1_g1	sp|Q39255|SKP1A_ARATH	SKP1A	SKP1-like protein 1A OS=Arabidopsis thaliana GN=SKP1A PE=1 SV=1	62.3	6e-51
TRINITY_DN17509_c0_g1	sp|Q9SLL2|BIG1B_ARATH	At1g54200	Protein BIG GRAIN 1-like B OS=Arabidopsis thaliana GN=At1g54200 PE=2 SV=1	34.4	1.4e-27
TRINITY_DN17510_c0_g1	sp|P35685|RL7A1_ORYSJ	RPL7A-1	60S ribosomal protein L7a-1 OS=Oryza sativa subsp. japonica GN=RPL7A-1 PE=2 SV=1	100	1.3e-139
TRINITY_DN17512_c0_g1	sp|Q8LPL5|FZR3_ARATH	FZR3	Protein FIZZY-RELATED 3 OS=Arabidopsis thaliana GN=FZR3 PE=1 SV=1	70.6	6.8e-193
TRINITY_DN17514_c0_g4	sp|Q84WV1|TCPG_ARATH	CCT3	T-complex protein 1 subunit gamma OS=Arabidopsis thaliana GN=CCT3 PE=1 SV=1	79.2	1e-26
TRINITY_DN17514_c0_g5	sp|Q84WV1|TCPG_ARATH	CCT3	T-complex protein 1 subunit gamma OS=Arabidopsis thaliana GN=CCT3 PE=1 SV=1	92.2	3.5e-100
TRINITY_DN17515_c1_g1	sp|Q8GV43|PLCD6_ARATH	PLC6	Phosphoinositide phospholipase C 6 OS=Arabidopsis thaliana GN=PLC6 PE=2 SV=2	83.6	1.2e-25
TRINITY_DN17517_c0_g1	sp|Q9AT72|FAD2_CALOF	FAD2	Delta(12) fatty acid desaturase FAD2 OS=Calendula officinalis GN=FAD2 PE=2 SV=1	52.4	1.1e-116
TRINITY_DN17518_c0_g1	sp|Q8LFL8|LSM1B_ARATH	LSM1B	Sm-like protein LSM1B OS=Arabidopsis thaliana GN=LSM1B PE=1 SV=1	87.3	2.7e-32
TRINITY_DN17518_c0_g2	sp|Q9STX3|GID2_ARATH	GID2	F-box protein GID2 OS=Arabidopsis thaliana GN=GID2 PE=1 SV=1	60.4	4.5e-42
TRINITY_DN17520_c0_g1	sp|O49884|RL30_LUPLU	RPL30	60S ribosomal protein L30 OS=Lupinus luteus GN=RPL30 PE=3 SV=1	98.2	2.6e-59
TRINITY_DN17521_c1_g1	sp|Q9LSD5|TCP20_ARATH	TCP20	Transcription factor TCP20 OS=Arabidopsis thaliana GN=TCP20 PE=1 SV=1	48.4	2.9e-43
TRINITY_DN17521_c2_g1	sp|C0LGH2|Y1561_ARATH	At1g56130	Probable LRR receptor-like serine/threonine-protein kinase At1g56130 OS=Arabidopsis thaliana GN=At1g56130 PE=2 SV=2	51.2	1e-51
TRINITY_DN17525_c0_g1	sp|P49211|RL321_ARATH	RPL32A	60S ribosomal protein L32-1 OS=Arabidopsis thaliana GN=RPL32A PE=2 SV=2	85	4.7e-60
TRINITY_DN17525_c0_g4	sp|P49211|RL321_ARATH	RPL32A	60S ribosomal protein L32-1 OS=Arabidopsis thaliana GN=RPL32A PE=2 SV=2	75.6	7.5e-10
TRINITY_DN17527_c0_g1	sp|P82159|MLE1_LIZRA	-	Myosin light chain 1, skeletal muscle isoform OS=Liza ramada PE=1 SV=1	85.3	3e-72
TRINITY_DN17527_c0_g4	sp|P62871|GBB1_BOVIN	GNB1	Guanine nucleotide-binding protein G(I)/G(S)/G(T) subunit beta-1 OS=Bos taurus GN=GNB1 PE=1 SV=3	98.8	2.8e-43
TRINITY_DN17527_c0_g8	sp|B8AP31|GBB_ORYSI	RGBB	Guanine nucleotide-binding protein subunit beta OS=Oryza sativa subsp. indica GN=RGBB PE=2 SV=1	55.8	2.8e-18
TRINITY_DN17529_c0_g1	sp|Q9FHM0|TBL17_ARATH	YLS7	Protein YLS7 OS=Arabidopsis thaliana GN=YLS7 PE=2 SV=1	75.2	3.2e-173
TRINITY_DN17529_c0_g3	sp|Q9FHM4|MA653_ARATH	MAP65-3	65-kDa microtubule-associated protein 3 OS=Arabidopsis thaliana GN=MAP65-3 PE=1 SV=1	66.4	9.2e-162
TRINITY_DN17530_c0_g1	sp|Q9M573|RL31_PERFR	RPL31	60S ribosomal protein L31 OS=Perilla frutescens GN=RPL31 PE=2 SV=1	84.1	2.9e-44
TRINITY_DN17530_c1_g1	sp|Q90YT7|RL31_ICTPU	rpl31	60S ribosomal protein L31 OS=Ictalurus punctatus GN=rpl31 PE=2 SV=1	93.9	1.7e-54
TRINITY_DN17530_c1_g2	sp|Q9IA76|RL31_PAROL	rpl31	60S ribosomal protein L31 OS=Paralichthys olivaceus GN=rpl31 PE=2 SV=1	92.3	3.7e-28
TRINITY_DN17530_c2_g1	sp|Q5I7K3|RS29_WHEAT	RPS29	40S ribosomal protein S29 OS=Triticum aestivum GN=RPS29 PE=1 SV=1	94.6	8e-28
TRINITY_DN17533_c0_g1	sp|P35685|RL7A1_ORYSJ	RPL7A-1	60S ribosomal protein L7a-1 OS=Oryza sativa subsp. japonica GN=RPL7A-1 PE=2 SV=1	87.9	6.4e-126
TRINITY_DN17534_c0_g1	sp|Q9P7W0|OPA3_SCHPO	SPBC1703.11	OPA3-like protein OS=Schizosaccharomyces pombe (strain 972 / ATCC 24843) GN=SPBC1703.11 PE=3 SV=1	44	5.2e-14
TRINITY_DN17537_c0_g5	sp|P54609|CD48A_ARATH	CDC48A	Cell division control protein 48 homolog A OS=Arabidopsis thaliana GN=CDC48A PE=1 SV=1	94.6	1.3e-34
TRINITY_DN17540_c0_g1	sp|Q84WJ2|PRI2_ARATH	At1g67320	Probable DNA primase large subunit OS=Arabidopsis thaliana GN=At1g67320 PE=2 SV=2	72.3	2.5e-191
TRINITY_DN17541_c0_g1	sp|Q93ZH9|HHP1_ARATH	HHP1	Heptahelical transmembrane protein 1 OS=Arabidopsis thaliana GN=HHP1 PE=1 SV=1	63.3	4e-70
TRINITY_DN17541_c1_g2	sp|Q94AM9|CID4_ARATH	CID4	Polyadenylate-binding protein-interacting protein 4 OS=Arabidopsis thaliana GN=CID4 PE=2 SV=1	33.8	7.5e-11
TRINITY_DN17541_c2_g1	sp|I7C6E8|C7A52_PANGI	-	Beta-amyrin 28-oxidase OS=Panax ginseng PE=2 SV=1	84.6	6.5e-247
TRINITY_DN17541_c2_g2	sp|Q99942|RNF5_HUMAN	RNF5	E3 ubiquitin-protein ligase RNF5 OS=Homo sapiens GN=RNF5 PE=1 SV=1	45.1	2e-21
TRINITY_DN17543_c0_g3	sp|Q9LV11|PMA11_ARATH	AHA11	ATPase 11, plasma membrane-type OS=Arabidopsis thaliana GN=AHA11 PE=1 SV=1	40.7	1.7e-12
TRINITY_DN17546_c0_g1	sp|Q9FMK9|PPA29_ARATH	PAP29	Probable inactive purple acid phosphatase 29 OS=Arabidopsis thaliana GN=PAP29 PE=2 SV=1	62.8	5.1e-138
TRINITY_DN17547_c0_g1	sp|Q9BVW5|TIPIN_HUMAN	TIPIN	TIMELESS-interacting protein OS=Homo sapiens GN=TIPIN PE=1 SV=2	28.9	1.1e-07
TRINITY_DN17548_c0_g2	sp|Q0WT19|IP5P8_ARATH	IP5P8	Type I inositol polyphosphate 5-phosphatase 8 OS=Arabidopsis thaliana GN=IP5P8 PE=2 SV=1	44.7	8.5e-15
TRINITY_DN17548_c0_g3	sp|Q0WT19|IP5P8_ARATH	IP5P8	Type I inositol polyphosphate 5-phosphatase 8 OS=Arabidopsis thaliana GN=IP5P8 PE=2 SV=1	61.9	1.3e-115
TRINITY_DN17549_c0_g1	sp|Q6PQJ9|5BPOR_DIGLA	-	3-oxo-Delta(4,5)-steroid 5-beta-reductase OS=Digitalis lanata PE=1 SV=1	74	1.1e-135
TRINITY_DN17549_c0_g2	sp|Q6PQJ9|5BPOR_DIGLA	-	3-oxo-Delta(4,5)-steroid 5-beta-reductase OS=Digitalis lanata PE=1 SV=1	68.4	2.4e-171
TRINITY_DN1754_c0_g1	sp|Q43007|PLDA1_ORYSJ	PLD1	Phospholipase D alpha 1 OS=Oryza sativa subsp. japonica GN=PLD1 PE=1 SV=2	100	9e-35
TRINITY_DN17552_c0_g1	sp|O22768|UNE12_ARATH	UNE12	Transcription factor UNE12 OS=Arabidopsis thaliana GN=UNE12 PE=2 SV=2	56	2e-43
TRINITY_DN17554_c0_g1	sp|Q9FJX5|BT4_ARATH	BT4	BTB/POZ and TAZ domain-containing protein 4 OS=Arabidopsis thaliana GN=BT4 PE=1 SV=1	57.8	1.3e-118
TRINITY_DN17557_c1_g2	sp|Q9FN67|Y5133_ARATH	At5g41330	BTB/POZ domain-containing protein At5g41330 OS=Arabidopsis thaliana GN=At5g41330 PE=2 SV=1	64.5	8.6e-117
TRINITY_DN17558_c0_g1	sp|P81898|PNAA_PRUDU	-	Peptide-N4-(N-acetyl-beta-glucosaminyl)asparagine amidase A OS=Prunus dulcis PE=1 SV=2	65.8	8.8e-218
TRINITY_DN17559_c1_g1	sp|Q4R361|ZN645_MACFA	ZNF645	E3 ubiquitin-protein ligase ZNF645 OS=Macaca fascicularis GN=ZNF645 PE=2 SV=1	50	2.3e-06
TRINITY_DN17562_c0_g2	sp|Q9SYK0|HEXO2_ARATH	HEXO2	Beta-hexosaminidase 2 OS=Arabidopsis thaliana GN=HEXO2 PE=1 SV=1	76.1	2.4e-16
TRINITY_DN17563_c0_g1	sp|Q9FKX5|NIPL1_ARATH	ATL27	NEP1-interacting protein-like 1 OS=Arabidopsis thaliana GN=ATL27 PE=2 SV=1	41.8	1.9e-09
TRINITY_DN17564_c0_g2	sp|Q8VYI3|ECH2_ARATH	ECH2	Enoyl-CoA hydratase 2, peroxisomal OS=Arabidopsis thaliana GN=ECH2 PE=1 SV=1	64	1.8e-105
TRINITY_DN17570_c0_g2	sp|Q0WQF7|ODP21_ARATH	LTA3	Dihydrolipoyllysine-residue acetyltransferase component 1 of pyruvate dehydrogenase complex, mitochondrial OS=Arabidopsis thaliana GN=LTA3 PE=1 SV=2	64.4	9.3e-135
TRINITY_DN17572_c0_g1	sp|O82572|PROF1_RICCO	PRO1	Profilin-1 OS=Ricinus communis GN=PRO1 PE=2 SV=1	87.5	8.6e-39
TRINITY_DN17574_c0_g2	sp|P12617|DCMC_ANSAN	MLYCD	Malonyl-CoA decarboxylase, mitochondrial OS=Anser anser anser GN=MLYCD PE=1 SV=2	40	7.9e-77
TRINITY_DN17575_c0_g11	sp|Q945T0|RALF_TOBAC	RALF	Rapid alkalinization factor OS=Nicotiana tabacum GN=RALF PE=1 SV=1	67.6	4.2e-33
TRINITY_DN17576_c0_g1	sp|Q39050|CKL11_ARATH	CKL11	Casein kinase 1-like protein 11 OS=Arabidopsis thaliana GN=CKL11 PE=1 SV=1	50	4.6e-29
TRINITY_DN17579_c0_g1	sp|O04860|PP2A5_TOBAC	NPP5	Serine/threonine-protein phosphatase PP2A-5 catalytic subunit OS=Nicotiana tabacum GN=NPP5 PE=2 SV=1	95.8	2.3e-38
TRINITY_DN17582_c0_g1	sp|Q8LFY8|ATL54_ARATH	ATL54	RING-H2 finger protein ATL54 OS=Arabidopsis thaliana GN=ATL54 PE=2 SV=2	41.8	1.2e-37
TRINITY_DN17583_c0_g1	sp|B1XL18|TIG_SYNP2	tig	Trigger factor OS=Synechococcus sp. (strain ATCC 27264 / PCC 7002 / PR-6) GN=tig PE=3 SV=1	30.6	2.2e-10
TRINITY_DN17585_c0_g1	sp|Q7ZV82|RL27_DANRE	rpl27	60S ribosomal protein L27 OS=Danio rerio GN=rpl27 PE=2 SV=3	100	6.1e-64
TRINITY_DN17585_c0_g2	sp|P61356|RL27_BOVIN	RPL27	60S ribosomal protein L27 OS=Bos taurus GN=RPL27 PE=2 SV=2	100	1.1e-68
TRINITY_DN17588_c0_g1	sp|Q0WRJ2|TC10A_ARATH	TSC10A	3-dehydrosphinganine reductase TSC10A OS=Arabidopsis thaliana GN=TSC10A PE=1 SV=1	59.6	7.7e-97
TRINITY_DN17589_c1_g1	sp|Q9ZNT0|VPS4_ARATH	SKD1	Protein SUPPRESSOR OF K(+) TRANSPORT GROWTH DEFECT 1 OS=Arabidopsis thaliana GN=SKD1 PE=1 SV=1	86.9	1.4e-129
TRINITY_DN17589_c1_g2	sp|Q9ZNT0|VPS4_ARATH	SKD1	Protein SUPPRESSOR OF K(+) TRANSPORT GROWTH DEFECT 1 OS=Arabidopsis thaliana GN=SKD1 PE=1 SV=1	89.6	2.4e-170
TRINITY_DN17590_c0_g1	sp|Q41350|OLP1_SOLLC	-	Osmotin-like protein OS=Solanum lycopersicum PE=1 SV=1	71.4	3.7e-101
TRINITY_DN17592_c1_g5	sp|B8B9K6|R10A_ORYSI	RPL10A	60S ribosomal protein L10a OS=Oryza sativa subsp. indica GN=RPL10A PE=3 SV=1	86.2	4.7e-37
TRINITY_DN17594_c0_g1	sp|Q9ZU11|ATB15_ARATH	ATHB-15	Homeobox-leucine zipper protein ATHB-15 OS=Arabidopsis thaliana GN=ATHB-15 PE=1 SV=1	75.7	1.5e-258
TRINITY_DN17598_c1_g1	sp|Q9SSE9|JMJ25_ARATH	JMJ25	Lysine-specific demethylase JMJ25 OS=Arabidopsis thaliana GN=JMJ25 PE=1 SV=1	72.8	3e-55
TRINITY_DN17600_c0_g1	sp|Q8JIU7|NACA_DANRE	naca	Nascent polypeptide-associated complex subunit alpha OS=Danio rerio GN=naca PE=1 SV=1	100	1.8e-59
TRINITY_DN17602_c1_g1	sp|Q9FH75|GLR13_ARATH	GLR1.3	Glutamate receptor 1.3 OS=Arabidopsis thaliana GN=GLR1.3 PE=2 SV=1	59.8	5.6e-20
TRINITY_DN17602_c1_g3	sp|Q8LGN1|GLR14_ARATH	GLR1.4	Glutamate receptor 1.4 OS=Arabidopsis thaliana GN=GLR1.4 PE=2 SV=2	43.4	1.2e-15
TRINITY_DN17602_c1_g4	sp|Q9LV72|GLR12_ARATH	GLR1.2	Glutamate receptor 1.2 OS=Arabidopsis thaliana GN=GLR1.2 PE=2 SV=1	44.2	7.5e-09
TRINITY_DN17603_c1_g1	sp|Q9P6P3|PPK15_SCHPO	ppk15	Serine/threonine-protein kinase ppk15 OS=Schizosaccharomyces pombe (strain 972 / ATCC 24843) GN=ppk15 PE=1 SV=1	42.4	1.5e-39
TRINITY_DN17603_c2_g1	sp|P32438|YPOL_THETH	-	IMPACT family member in pol 5'region (Fragment) OS=Thermus thermophilus PE=3 SV=1	50.7	4.9e-30
TRINITY_DN17604_c2_g4	sp|Q9SMU7|SRP09_ARATH	SRP9	Signal recognition particle 9 kDa protein OS=Arabidopsis thaliana GN=SRP9 PE=3 SV=1	83.5	5.6e-46
TRINITY_DN17604_c2_g7	sp|Q9SMU7|SRP09_ARATH	SRP9	Signal recognition particle 9 kDa protein OS=Arabidopsis thaliana GN=SRP9 PE=3 SV=1	82.5	4.1e-45
TRINITY_DN17607_c0_g3	sp|Q9SR06|CLP1_ARATH	CLPS3	Protein CLP1 homolog OS=Arabidopsis thaliana GN=CLPS3 PE=1 SV=1	72.5	5.3e-179
TRINITY_DN17609_c0_g11	sp|Q9ZNR6|PDX12_ARATH	PDX12	Pyridoxal 5'-phosphate synthase-like subunit PDX1.2 OS=Arabidopsis thaliana GN=PDX12 PE=1 SV=1	68	8.1e-115
TRINITY_DN17609_c0_g5	sp|Q9LMU1|EGY3_ARATH	EGY3	Probable zinc metallopeptidase EGY3, chloroplastic OS=Arabidopsis thaliana GN=EGY3 PE=1 SV=1	86.9	4e-238
TRINITY_DN17609_c0_g6	sp|Q9ZNR6|PDX12_ARATH	PDX12	Pyridoxal 5'-phosphate synthase-like subunit PDX1.2 OS=Arabidopsis thaliana GN=PDX12 PE=1 SV=1	67.4	1.1e-116
TRINITY_DN17609_c0_g9	sp|Q39963|PDX1_HEVBR	PDX1	Probable pyridoxal 5'-phosphate synthase subunit PDX1 OS=Hevea brasiliensis GN=PDX1 PE=2 SV=1	89.5	2.5e-33
TRINITY_DN17611_c0_g2	sp|P43294|MHK_ARATH	MHK	Serine/threonine-protein kinase MHK OS=Arabidopsis thaliana GN=MHK PE=2 SV=2	62.4	7.4e-160
TRINITY_DN17612_c0_g2	sp|Q8VYS0|RD19D_ARATH	RD19D	Probable cysteine protease RD19D OS=Arabidopsis thaliana GN=RD19D PE=2 SV=1	76	6.7e-112
TRINITY_DN17613_c1_g4	sp|Q6QPJ6|PRXQ_POPJC	PRXQ	Peroxiredoxin Q, chloroplastic OS=Populus jackii GN=PRXQ PE=1 SV=1	75.7	1e-82
TRINITY_DN17614_c0_g1	sp|P20784|ROL6_CAEEL	rol-6	Cuticle collagen rol-6 OS=Caenorhabditis elegans GN=rol-6 PE=1 SV=1	50.8	1.3e-08
TRINITY_DN17615_c0_g2	sp|F4K265|AT101_ARATH	ATG101	Autophagy-related protein 101 OS=Arabidopsis thaliana GN=ATG101 PE=1 SV=1	73.1	2e-46
TRINITY_DN17615_c0_g8	sp|Q8LFY8|ATL54_ARATH	ATL54	RING-H2 finger protein ATL54 OS=Arabidopsis thaliana GN=ATL54 PE=2 SV=2	40.9	4.4e-15
TRINITY_DN17615_c0_g9	sp|P08283|H1_PEA	-	Histone H1 OS=Pisum sativum PE=2 SV=1	73.7	5.7e-22
TRINITY_DN17616_c0_g3	sp|Q39097|ERF1X_ARATH	ERF1-1	Eukaryotic peptide chain release factor subunit 1-1 OS=Arabidopsis thaliana GN=ERF1-1 PE=1 SV=2	94.1	2.4e-79
TRINITY_DN17616_c0_g5	sp|P35614|ERF1Z_ARATH	ERF1-3	Eukaryotic peptide chain release factor subunit 1-3 OS=Arabidopsis thaliana GN=ERF1-3 PE=1 SV=1	91.9	2.9e-231
TRINITY_DN17618_c0_g1	sp|P0DKG8|RSH1L_ARATH	RSH1	Putative GTP diphosphokinase RSH1, chloroplastic OS=Arabidopsis thaliana GN=RSH1 PE=1 SV=1	70.9	4.7e-257
TRINITY_DN17618_c0_g2	sp|F4JHA2|RSH1C_ARATH	RSH1	Putative GTP diphosphokinase RSH1, chloroplastic OS=Arabidopsis thaliana GN=RSH1 PE=1 SV=1	61.9	2.7e-73
TRINITY_DN17619_c0_g3	sp|P33050|PSC13_MAIZE	MGS1	Pollen-specific protein C13 OS=Zea mays GN=MGS1 PE=2 SV=1	41.4	5.9e-19
TRINITY_DN17619_c0_g4	sp|Q9SS90|RGLG1_ARATH	RGLG1	E3 ubiquitin-protein ligase RGLG1 OS=Arabidopsis thaliana GN=RGLG1 PE=1 SV=1	81.7	7.1e-48
TRINITY_DN17624_c1_g2	sp|Q38772|CDC2A_ANTMA	CDC2A	Cell division control protein 2 homolog A OS=Antirrhinum majus GN=CDC2A PE=2 SV=2	89.1	1.2e-156
TRINITY_DN17624_c1_g4	sp|Q38772|CDC2A_ANTMA	CDC2A	Cell division control protein 2 homolog A OS=Antirrhinum majus GN=CDC2A PE=2 SV=2	87.4	7.9e-155
TRINITY_DN17627_c1_g1	sp|B8B8I3|ALFL2_ORYSI	OsI_25444	PHD finger protein ALFIN-LIKE 2 OS=Oryza sativa subsp. indica GN=OsI_25444 PE=3 SV=1	66.7	2.2e-12
TRINITY_DN17627_c1_g2	sp|Q9FFF5|ALFL1_ARATH	AL1	PHD finger protein ALFIN-LIKE 1 OS=Arabidopsis thaliana GN=AL1 PE=1 SV=1	75.3	1.7e-77
TRINITY_DN17627_c1_g3	sp|O81488|ALFL4_ARATH	AL4	PHD finger protein ALFIN-LIKE 4 OS=Arabidopsis thaliana GN=AL4 PE=1 SV=2	77.2	1e-86
TRINITY_DN17627_c1_g7	sp|Q9FFF5|ALFL1_ARATH	AL1	PHD finger protein ALFIN-LIKE 1 OS=Arabidopsis thaliana GN=AL1 PE=1 SV=1	75.5	4e-106
TRINITY_DN17628_c0_g3	sp|Q9LW68|LSH4_ARATH	LSH4	Protein LIGHT-DEPENDENT SHORT HYPOCOTYLS 4 OS=Arabidopsis thaliana GN=LSH4 PE=1 SV=1	85.7	1.9e-60
TRINITY_DN17630_c1_g4	sp|Q39264|ZFP5_ARATH	ZFP5	Zinc finger protein 5 OS=Arabidopsis thaliana GN=ZFP5 PE=2 SV=1	34.8	2.5e-13
TRINITY_DN17630_c1_g5	sp|Q39264|ZFP5_ARATH	ZFP5	Zinc finger protein 5 OS=Arabidopsis thaliana GN=ZFP5 PE=2 SV=1	34.2	1.6e-15
TRINITY_DN17632_c0_g1	sp|Q9CWU6|UQCC1_MOUSE	Uqcc1	Ubiquinol-cytochrome-c reductase complex assembly factor 1 OS=Mus musculus GN=Uqcc1 PE=1 SV=1	24.8	9.3e-08
TRINITY_DN17632_c0_g2	sp|Q9FK81|Y5258_ARATH	At5g22580	Stress-response A/B barrel domain-containing protein At5g22580 OS=Arabidopsis thaliana GN=At5g22580 PE=1 SV=1	70.7	1.5e-33
TRINITY_DN17633_c0_g1	sp|Q93ZJ3|NFD6_ARATH	NFD6	Protein NUCLEAR FUSION DEFECTIVE 6, chloroplastic/mitochondrial OS=Arabidopsis thaliana GN=NFD6 PE=2 SV=1	47.1	1.6e-06
TRINITY_DN17634_c0_g10	sp|O04086|Y1105_ARATH	At1g11050	Probable receptor-like protein kinase At1g11050 OS=Arabidopsis thaliana GN=At1g11050 PE=2 SV=1	65.8	1.7e-18
TRINITY_DN17634_c0_g2	sp|Q8VYA3|WAKLJ_ARATH	WAKL10	Wall-associated receptor kinase-like 10 OS=Arabidopsis thaliana GN=WAKL10 PE=2 SV=1	72.6	3e-32
TRINITY_DN17635_c0_g1	sp|Q6NZT6|I2B2A_DANRE	irf2bp2a	Interferon regulatory factor 2-binding protein 2-A OS=Danio rerio GN=irf2bp2a PE=2 SV=1	95.7	6.7e-75
TRINITY_DN17641_c1_g1	sp|Q55AD9|ARL5_DICDI	arl5	ADP-ribosylation factor-like protein 5 OS=Dictyostelium discoideum GN=arl5 PE=3 SV=1	62	3.1e-42
TRINITY_DN17641_c1_g3	sp|Q55AD9|ARL5_DICDI	arl5	ADP-ribosylation factor-like protein 5 OS=Dictyostelium discoideum GN=arl5 PE=3 SV=1	65.8	1.9e-40
TRINITY_DN17641_c2_g4	sp|Q7XA42|RGA1_SOLBU	RGA1	Putative disease resistance protein RGA1 OS=Solanum bulbocastanum GN=RGA1 PE=2 SV=2	34.6	2e-91
TRINITY_DN17644_c3_g2	sp|O14958|CASQ2_HUMAN	CASQ2	Calsequestrin-2 OS=Homo sapiens GN=CASQ2 PE=1 SV=2	84.8	1.6e-16
TRINITY_DN17644_c3_g6	sp|P12637|CASQ2_CANLF	CASQ2	Calsequestrin-2 OS=Canis lupus familiaris GN=CASQ2 PE=1 SV=1	76.6	2.7e-37
TRINITY_DN17647_c0_g1	sp|P61285|DYL1_BOVIN	DYNLL1	Dynein light chain 1, cytoplasmic OS=Bos taurus GN=DYNLL1 PE=1 SV=1	44.9	8.9e-15
TRINITY_DN17647_c0_g3	sp|F4I107|PAE1_ARATH	PAE1	Pectin acetylesterase 1 OS=Arabidopsis thaliana GN=PAE1 PE=3 SV=1	38.6	1.8e-11
TRINITY_DN17648_c0_g1	sp|Q9FPS3|UBP24_ARATH	UBP24	Ubiquitin carboxyl-terminal hydrolase 24 OS=Arabidopsis thaliana GN=UBP24 PE=1 SV=1	66	2.2e-128
TRINITY_DN17649_c0_g1	sp|Q8GUM4|Y3739_ARATH	At3g27390	Uncharacterized membrane protein At3g27390 OS=Arabidopsis thaliana GN=At3g27390 PE=1 SV=2	57.1	1.3e-187
TRINITY_DN17650_c1_g1	sp|Q9S7Y7|XYL1_ARATH	XYL1	Alpha-xylosidase 1 OS=Arabidopsis thaliana GN=XYL1 PE=1 SV=1	72.6	0
TRINITY_DN17650_c1_g4	sp|Q9S7Y7|XYL1_ARATH	XYL1	Alpha-xylosidase 1 OS=Arabidopsis thaliana GN=XYL1 PE=1 SV=1	67.8	1.4e-112
TRINITY_DN17653_c0_g1	sp|Q9XGW1|AGO10_ARATH	AGO10	Protein argonaute 10 OS=Arabidopsis thaliana GN=AGO10 PE=2 SV=1	74.2	1.2e-18
TRINITY_DN17654_c0_g1	sp|Q9SYG1|HS174_ARATH	HSP17.4B	17.4 kDa class III heat shock protein OS=Arabidopsis thaliana GN=HSP17.4B PE=2 SV=1	50.3	6.7e-35
TRINITY_DN17663_c1_g10	sp|Q38867|CP19C_ARATH	CYP19-3	Peptidyl-prolyl cis-trans isomerase CYP19-3 OS=Arabidopsis thaliana GN=CYP19-3 PE=2 SV=2	82.5	1.6e-80
TRINITY_DN17663_c1_g3	sp|Q9LY75|CYP63_ARATH	CYP63	Peptidyl-prolyl cis-trans isomerase CYP63 OS=Arabidopsis thaliana GN=CYP63 PE=1 SV=1	54.6	3.3e-77
TRINITY_DN17663_c1_g4	sp|P52011|CYP3_CAEEL	cyn-3	Peptidyl-prolyl cis-trans isomerase 3 OS=Caenorhabditis elegans GN=cyn-3 PE=1 SV=1	85.2	8e-25
TRINITY_DN17665_c1_g1	sp|Q98TR7|RS16_HETFO	rps16	40S ribosomal protein S16 OS=Heteropneustes fossilis GN=rps16 PE=2 SV=1	97.9	4.9e-76
TRINITY_DN17668_c0_g2	sp|Q9S823|LNG2_ARATH	LNG2	Protein LONGIFOLIA 2 OS=Arabidopsis thaliana GN=LNG2 PE=1 SV=1	25	2.2e-27
TRINITY_DN17669_c0_g5	sp|Q9T076|ENL2_ARATH	At4g27520	Early nodulin-like protein 2 OS=Arabidopsis thaliana GN=At4g27520 PE=1 SV=1	54.6	7.6e-35
TRINITY_DN17671_c1_g1	sp|Q5N749|MOR1_ORYSJ	MOR1	Protein MOR1 OS=Oryza sativa subsp. japonica GN=MOR1 PE=2 SV=1	70.1	0
TRINITY_DN17672_c1_g1	sp|Q8LDL0|HHL1_ARATH	HHL1	Protein HHL1, chloroplastic OS=Arabidopsis thaliana GN=HHL1 PE=1 SV=1	68.7	4e-83
TRINITY_DN17673_c0_g3	sp|Q9LE33|HPR3_ARATH	HPR3	Glyoxylate/hydroxypyruvate reductase HPR3 OS=Arabidopsis thaliana GN=HPR3 PE=2 SV=1	55	1.3e-91
TRINITY_DN17673_c0_g5	sp|Q9LQ07|EXP18_ARATH	EXPA18	Expansin-A18 OS=Arabidopsis thaliana GN=EXPA18 PE=2 SV=1	78.1	1.6e-26
TRINITY_DN17675_c2_g1	sp|O22286|BPM3_ARATH	BPM3	BTB/POZ and MATH domain-containing protein 3 OS=Arabidopsis thaliana GN=BPM3 PE=1 SV=1	66	6.8e-128
TRINITY_DN17675_c2_g4	sp|Q94A57|PHL2_ARATH	PHL2	Protein PHR1-LIKE 2 OS=Arabidopsis thaliana GN=PHL2 PE=1 SV=1	74.5	1.9e-39
TRINITY_DN17676_c0_g2	sp|O64843|CID7_ARATH	CID7	Polyadenylate-binding protein-interacting protein 7 OS=Arabidopsis thaliana GN=CID7 PE=1 SV=1	64.4	9.2e-17
TRINITY_DN17676_c1_g1	sp|O64843|CID7_ARATH	CID7	Polyadenylate-binding protein-interacting protein 7 OS=Arabidopsis thaliana GN=CID7 PE=1 SV=1	85.1	1.1e-13
TRINITY_DN17677_c0_g1	sp|D1ZKF3|AMPP1_SORMK	AMPP	Probable Xaa-Pro aminopeptidase P OS=Sordaria macrospora (strain ATCC MYA-333 / DSM 997 / K(L3346) / K-hell) GN=AMPP PE=3 SV=1	46.1	6.4e-156
TRINITY_DN17678_c0_g5	sp|Q9IBD8|PTPRC_CYPCA	ptprc	Receptor-type tyrosine-protein phosphatase C OS=Cyprinus carpio GN=ptprc PE=2 SV=1	44.4	4.6e-11
TRINITY_DN17678_c0_g6	sp|Q9IBD8|PTPRC_CYPCA	ptprc	Receptor-type tyrosine-protein phosphatase C OS=Cyprinus carpio GN=ptprc PE=2 SV=1	100	1.4e-27
TRINITY_DN17684_c0_g2	sp|Q42347|RL241_ARATH	RPL24A	60S ribosomal protein L24-1 OS=Arabidopsis thaliana GN=RPL24A PE=1 SV=2	80.2	2.3e-61
TRINITY_DN17685_c0_g1	sp|P86888|PMLN_PRUPE	-	Peamaclein OS=Prunus persica PE=1 SV=1	90	4.9e-31
TRINITY_DN17685_c0_g7	sp|O82811|NRT21_ARATH	NRT2.1	High-affinity nitrate transporter 2.1 OS=Arabidopsis thaliana GN=NRT2.1 PE=1 SV=1	82.9	4.6e-67
TRINITY_DN17688_c0_g1	sp|P93479|RETO_PAPSO	BBE1	Reticuline oxidase OS=Papaver somniferum GN=BBE1 PE=2 SV=1	55.6	3.5e-63
TRINITY_DN17688_c0_g2	sp|Q9FKU8|BBE26_ARATH	At5g44400	Berberine bridge enzyme-like 26 OS=Arabidopsis thaliana GN=At5g44400 PE=2 SV=1	39	1.4e-60
TRINITY_DN17692_c2_g1	sp|Q8LGU7|RNZN_ARATH	NUZ	Nuclear ribonuclease Z OS=Arabidopsis thaliana GN=NUZ PE=2 SV=3	72.7	1.3e-112
TRINITY_DN17693_c0_g1	sp|Q8GZ79|TI201_ARATH	TIC20-I	Protein TIC 20-I, chloroplastic OS=Arabidopsis thaliana GN=TIC20-I PE=1 SV=1	67.6	3e-97
TRINITY_DN17694_c0_g1	sp|A2XV58|DCAM_ORYSI	SAMDC	S-adenosylmethionine decarboxylase proenzyme OS=Oryza sativa subsp. indica GN=SAMDC PE=2 SV=2	100	3e-235
TRINITY_DN17694_c0_g2	sp|O24575|DCAM_MAIZE	SAMDC	S-adenosylmethionine decarboxylase proenzyme OS=Zea mays GN=SAMDC PE=2 SV=1	100	7.1e-48
TRINITY_DN17695_c1_g1	sp|Q29Q81|SMR6_ARATH	SMR6	Cyclin-dependent protein kinase inhibitor SMR6 OS=Arabidopsis thaliana GN=SMR6 PE=1 SV=1	35.4	6e-06
TRINITY_DN17697_c1_g1	sp|Q5ZIY4|SBDS_CHICK	SBDS	Ribosome maturation protein SBDS OS=Gallus gallus GN=SBDS PE=2 SV=1	43.6	3.5e-27
TRINITY_DN17697_c1_g4	sp|Q3SWZ6|SBDS_BOVIN	SBDS	Ribosome maturation protein SBDS OS=Bos taurus GN=SBDS PE=2 SV=1	67	8.7e-32
TRINITY_DN17701_c0_g1	sp|Q9LX14|UFC_ARATH	UFC	Protein UPSTREAM OF FLC OS=Arabidopsis thaliana GN=UFC PE=2 SV=1	64.7	5.3e-06
TRINITY_DN17704_c1_g1	sp|P42211|ASPRX_ORYSJ	RAP	Aspartic proteinase OS=Oryza sativa subsp. japonica GN=RAP PE=2 SV=2	58.8	1.1e-171
TRINITY_DN17706_c0_g1	sp|Q9LSF1|OXI1_ARATH	OXI1	Serine/threonine-protein kinase OXI1 OS=Arabidopsis thaliana GN=OXI1 PE=1 SV=1	52.9	3.8e-111
TRINITY_DN17706_c0_g5	sp|C0SUT9|JMJ16_ARATH	JMJ16	Putative lysine-specific demethylase JMJ16 OS=Arabidopsis thaliana GN=JMJ16 PE=2 SV=1	54	0
TRINITY_DN17707_c1_g4	sp|Q9SSD2|PRP8A_ARATH	PRP8A	Pre-mRNA-processing-splicing factor 8A OS=Arabidopsis thaliana GN=PRP8A PE=1 SV=1	85.9	1.2e-37
TRINITY_DN17710_c0_g1	sp|Q9LUZ4|C3H66_ARATH	At5g58620	Zinc finger CCCH domain-containing protein 66 OS=Arabidopsis thaliana GN=At5g58620 PE=2 SV=1	48.4	5.2e-156
TRINITY_DN17714_c0_g1	sp|O48915|NDR1_ARATH	NDR1	Protein NDR1 OS=Arabidopsis thaliana GN=NDR1 PE=1 SV=1	46.6	7.5e-39
TRINITY_DN17716_c0_g1	sp|E9L7A5|PAT_PETHY	-	Bifunctional aspartate aminotransferase and glutamate/aspartate-prephenate aminotransferase OS=Petunia hybrida PE=1 SV=1	69	1.3e-17
TRINITY_DN17717_c1_g1	sp|P93111|HEM11_CUCSA	HEMA1	Glutamyl-tRNA reductase 1, chloroplastic OS=Cucumis sativus GN=HEMA1 PE=2 SV=1	82	6.8e-236
TRINITY_DN17717_c1_g4	sp|P93111|HEM11_CUCSA	HEMA1	Glutamyl-tRNA reductase 1, chloroplastic OS=Cucumis sativus GN=HEMA1 PE=2 SV=1	81.5	1.1e-102
TRINITY_DN17718_c1_g1	sp|O82802|SIR1_TOBAC	SIR1	Sulfite reductase 1 [ferredoxin], chloroplastic OS=Nicotiana tabacum GN=SIR1 PE=1 SV=1	81.8	4.7e-232
TRINITY_DN17718_c1_g2	sp|O82802|SIR1_TOBAC	SIR1	Sulfite reductase 1 [ferredoxin], chloroplastic OS=Nicotiana tabacum GN=SIR1 PE=1 SV=1	79.3	0
TRINITY_DN17722_c1_g1	sp|Q8S8P5|WRK33_ARATH	WRKY33	Probable WRKY transcription factor 33 OS=Arabidopsis thaliana GN=WRKY33 PE=1 SV=2	61	8.2e-27
TRINITY_DN17722_c2_g1	sp|P55141|PHYA_PETCR	PHYA	Phytochrome A OS=Petroselinum crispum GN=PHYA PE=2 SV=1	84.9	0
TRINITY_DN17722_c2_g3	sp|P55141|PHYA_PETCR	PHYA	Phytochrome A OS=Petroselinum crispum GN=PHYA PE=2 SV=1	81.1	1.8e-147
TRINITY_DN17725_c0_g1	sp|Q9SNC0|MBD5_ARATH	MBD5	Methyl-CpG-binding domain-containing protein 5 OS=Arabidopsis thaliana GN=MBD5 PE=1 SV=1	31.5	2.6e-18
TRINITY_DN17727_c0_g2	sp|Q9FY06|PPF1_PEA	PPF-1	Inner membrane protein PPF-1, chloroplastic OS=Pisum sativum GN=PPF-1 PE=2 SV=2	80.2	5.5e-162
TRINITY_DN17729_c1_g1	sp|Q8LBK6|GRS15_ARATH	GRXS15	Monothiol glutaredoxin-S15, mitochondrial OS=Arabidopsis thaliana GN=GRXS15 PE=1 SV=2	64.2	1.6e-21
TRINITY_DN17729_c1_g2	sp|Q8LBK6|GRS15_ARATH	GRXS15	Monothiol glutaredoxin-S15, mitochondrial OS=Arabidopsis thaliana GN=GRXS15 PE=1 SV=2	81.7	2.4e-23
TRINITY_DN17730_c0_g1	sp|O22827|MOC2B_ARATH	MOCS2	Molybdopterin synthase catalytic subunit OS=Arabidopsis thaliana GN=MOCS2 PE=2 SV=1	67.7	2.2e-69
TRINITY_DN17731_c0_g1	sp|Q6DR04|RTNLQ_ARATH	RTNLB17	Reticulon-like protein B17 OS=Arabidopsis thaliana GN=RTNLB17 PE=2 SV=1	39.5	4e-12
TRINITY_DN17731_c0_g2	sp|Q6DR04|RTNLQ_ARATH	RTNLB17	Reticulon-like protein B17 OS=Arabidopsis thaliana GN=RTNLB17 PE=2 SV=1	59.7	5.5e-18
TRINITY_DN17731_c0_g3	sp|Q6DR04|RTNLQ_ARATH	RTNLB17	Reticulon-like protein B17 OS=Arabidopsis thaliana GN=RTNLB17 PE=2 SV=1	60.5	5.4e-46
TRINITY_DN17732_c0_g2	sp|A2Y7D9|PSAH_ORYSI	PSAH	Photosystem I reaction center subunit VI, chloroplastic OS=Oryza sativa subsp. indica GN=PSAH PE=2 SV=1	100	2.4e-29
TRINITY_DN17732_c1_g1	sp|P17407|21KD_DAUCA	-	21 kDa protein OS=Daucus carota PE=2 SV=1	48.2	8.5e-42
TRINITY_DN17732_c1_g3	sp|O04937|DHEA_NICPL	GDHA	Glutamate dehydrogenase A OS=Nicotiana plumbaginifolia GN=GDHA PE=2 SV=1	85.9	4.1e-217
TRINITY_DN17733_c0_g1	sp|P17093|RS11_SOYBN	RPS11	40S ribosomal protein S11 OS=Glycine max GN=RPS11 PE=2 SV=2	99.3	4.6e-83
TRINITY_DN17737_c0_g1	sp|Q8GYD1|PDI51_ARATH	PDIL5-1	Protein disulfide-isomerase 5-1 OS=Arabidopsis thaliana GN=PDIL5-1 PE=2 SV=1	74.5	2.5e-34
TRINITY_DN17738_c0_g1	sp|Q0WMN5|Y3913_ARATH	At3g49140	Uncharacterized protein At3g49140 OS=Arabidopsis thaliana GN=At3g49140 PE=1 SV=2	45.3	1.1e-51
TRINITY_DN17739_c0_g4	sp|Q9LUL4|SRF7_ARATH	SRF7	Protein STRUBBELIG-RECEPTOR FAMILY 7 OS=Arabidopsis thaliana GN=SRF7 PE=1 SV=1	76	5.1e-73
TRINITY_DN17741_c0_g1	sp|P55852|SUMO1_ARATH	SUMO1	Small ubiquitin-related modifier 1 OS=Arabidopsis thaliana GN=SUMO1 PE=1 SV=2	91.1	3.5e-40
TRINITY_DN17741_c0_g4	sp|P55852|SUMO1_ARATH	SUMO1	Small ubiquitin-related modifier 1 OS=Arabidopsis thaliana GN=SUMO1 PE=1 SV=2	93.3	1.1e-40
TRINITY_DN17742_c0_g1	sp|Q9LUG9|MD33A_ARATH	MED33A	Mediator of RNA polymerase II transcription subunit 33A OS=Arabidopsis thaliana GN=MED33A PE=1 SV=1	54.6	6e-239
TRINITY_DN17742_c0_g6	sp|O23620|AHL23_ARATH	AHL23	AT-hook motif nuclear-localized protein 23 OS=Arabidopsis thaliana GN=AHL23 PE=1 SV=1	83.5	1.4e-78
TRINITY_DN17743_c0_g1	sp|Q00265|PCNA2_DAUCA	-	Proliferating cell nuclear antigen large form OS=Daucus carota PE=2 SV=1	94.4	5.4e-137
TRINITY_DN17747_c1_g1	sp|Q39247|2ABB_ARATH	PP2AB2	Serine/threonine protein phosphatase 2A 55 kDa regulatory subunit B beta isoform OS=Arabidopsis thaliana GN=PP2AB2 PE=1 SV=1	90.3	8.2e-76
TRINITY_DN17747_c1_g2	sp|Q39247|2ABB_ARATH	PP2AB2	Serine/threonine protein phosphatase 2A 55 kDa regulatory subunit B beta isoform OS=Arabidopsis thaliana GN=PP2AB2 PE=1 SV=1	83.8	3.8e-61
TRINITY_DN17747_c1_g5	sp|Q39247|2ABB_ARATH	PP2AB2	Serine/threonine protein phosphatase 2A 55 kDa regulatory subunit B beta isoform OS=Arabidopsis thaliana GN=PP2AB2 PE=1 SV=1	60	3.7e-23
TRINITY_DN17747_c1_g6	sp|A2X2K3|2ABB_ORYSI	OsI_006296	Serine/threonine protein phosphatase 2A 55 kDa regulatory subunit B beta isoform OS=Oryza sativa subsp. indica GN=OsI_006296 PE=2 SV=2	86.5	2.4e-85
TRINITY_DN17747_c1_g7	sp|A2X2K3|2ABB_ORYSI	OsI_006296	Serine/threonine protein phosphatase 2A 55 kDa regulatory subunit B beta isoform OS=Oryza sativa subsp. indica GN=OsI_006296 PE=2 SV=2	87.9	3.7e-28
TRINITY_DN17748_c0_g1	sp|Q9SS03|DIR21_ARATH	DIR21	Dirigent protein 21 OS=Arabidopsis thaliana GN=DIR21 PE=3 SV=1	55.6	1.4e-51
TRINITY_DN17748_c0_g2	sp|Q9SS03|DIR21_ARATH	DIR21	Dirigent protein 21 OS=Arabidopsis thaliana GN=DIR21 PE=3 SV=1	55.1	6.7e-51
TRINITY_DN17750_c1_g1	sp|Q6NPS8|NDOR1_ARATH	ATR3	NADPH-dependent diflavin oxidoreductase 1 OS=Arabidopsis thaliana GN=ATR3 PE=1 SV=1	64.2	3.9e-37
TRINITY_DN17751_c1_g5	sp|Q3UHX0|NOL8_MOUSE	Nol8	Nucleolar protein 8 OS=Mus musculus GN=Nol8 PE=1 SV=2	36.2	6.7e-12
TRINITY_DN17752_c0_g3	sp|Q9NR56|MBNL1_HUMAN	MBNL1	Muscleblind-like protein 1 OS=Homo sapiens GN=MBNL1 PE=1 SV=2	75.7	4.1e-26
TRINITY_DN17753_c1_g2	sp|Q93YQ1|RTOR1_ARATH	RAPTOR1	Regulatory-associated protein of TOR 1 OS=Arabidopsis thaliana GN=RAPTOR1 PE=1 SV=1	64	1.6e-202
TRINITY_DN17753_c1_g5	sp|Q9FKA5|Y5957_ARATH	At5g39570	Uncharacterized protein At5g39570 OS=Arabidopsis thaliana GN=At5g39570 PE=1 SV=1	52.6	8.1e-22
TRINITY_DN17755_c0_g1	sp|Q9FF10|HPSE1_ARATH	At5g07830	Heparanase-like protein 1 OS=Arabidopsis thaliana GN=At5g07830 PE=2 SV=1	69.1	3.5e-65
TRINITY_DN17756_c0_g2	sp|P42739|UBIQP_ACEPE	-	Polyubiquitin (Fragment) OS=Acetabularia peniculus PE=3 SV=2	95.5	5.7e-189
TRINITY_DN17759_c0_g2	sp|Q852U6|RHY1A_ARATH	RHY1A	Probable E3 ubiquitin-protein ligase RHY1A OS=Arabidopsis thaliana GN=RHY1A PE=2 SV=1	36.9	7.1e-23
TRINITY_DN17763_c1_g1	sp|P84652|HBB_COTGO	hbb	Hemoglobin subunit beta OS=Cottoperca gobio GN=hbb PE=1 SV=2	77.6	3.5e-64
TRINITY_DN17764_c1_g1	sp|Q851Y7|GRXS7_ORYSJ	GRXS7	Monothiol glutaredoxin-S7, chloroplastic OS=Oryza sativa subsp. japonica GN=GRXS7 PE=2 SV=1	57.2	1.1e-45
TRINITY_DN17765_c0_g1	sp|Q86AQ5|RPC1_DICDI	polr3a	DNA-directed RNA polymerase III subunit rpc1 OS=Dictyostelium discoideum GN=polr3a PE=3 SV=1	36.3	1.2e-32
TRINITY_DN17766_c1_g2	sp|Q96254|GDI1_ARATH	GDI1	Guanosine nucleotide diphosphate dissociation inhibitor 1 OS=Arabidopsis thaliana GN=GDI1 PE=1 SV=1	87	6e-55
TRINITY_DN17767_c1_g1	sp|Q6QNI4|C71AJ_AMMMJ	CYP71AJ1	Psoralen synthase OS=Ammi majus GN=CYP71AJ1 PE=1 SV=1	58.3	5.3e-162
TRINITY_DN17769_c0_g2	sp|F4JTB3|DTX35_ARATH	DTX35	Protein DETOXIFICATION 35 OS=Arabidopsis thaliana GN=DTX35 PE=2 SV=1	67.2	4.1e-181
TRINITY_DN17771_c0_g2	sp|Q9ASR1|EF2_ARATH	LOS1	Elongation factor 2 OS=Arabidopsis thaliana GN=LOS1 PE=1 SV=1	91.6	1.1e-116
TRINITY_DN17772_c0_g3	sp|P46466|PRS4_ORYSJ	TBP2	26S protease regulatory subunit 4 homolog OS=Oryza sativa subsp. japonica GN=TBP2 PE=2 SV=2	96.1	8.7e-165
TRINITY_DN17772_c0_g8	sp|P46466|PRS4_ORYSJ	TBP2	26S protease regulatory subunit 4 homolog OS=Oryza sativa subsp. japonica GN=TBP2 PE=2 SV=2	97.2	7.5e-32
TRINITY_DN17775_c0_g1	sp|Q9LRP2|PT317_ARATH	At3g17430	Probable sugar phosphate/phosphate translocator At3g17430 OS=Arabidopsis thaliana GN=At3g17430 PE=1 SV=1	79	2.7e-154
TRINITY_DN17777_c0_g1	sp|P41246|MMP9_RABIT	MMP9	Matrix metalloproteinase-9 OS=Oryctolagus cuniculus GN=MMP9 PE=2 SV=1	53.2	1.4e-138
TRINITY_DN17777_c0_g2	sp|P52176|MMP9_BOVIN	MMP9	Matrix metalloproteinase-9 OS=Bos taurus GN=MMP9 PE=2 SV=1	50	9.5e-21
TRINITY_DN17779_c1_g2	sp|P29685|ATPBM_HEVBR	ATPB	ATP synthase subunit beta, mitochondrial OS=Hevea brasiliensis GN=ATPB PE=2 SV=1	97.7	5.2e-167
TRINITY_DN17782_c0_g2	sp|Q9LJ87|CDC73_ARATH	CDC73	Protein CDC73 homolog OS=Arabidopsis thaliana GN=CDC73 PE=1 SV=1	62.4	7.2e-144
TRINITY_DN17784_c1_g2	sp|Q8GZC3|FAD2_VERFO	FAD2	Delta(12)-fatty-acid desaturase FAD2 OS=Vernicia fordii GN=FAD2 PE=1 SV=1	56.4	1.1e-60
TRINITY_DN17786_c0_g2	sp|Q9SD84|PDCB2_ARATH	PDCB2	PLASMODESMATA CALLOSE-BINDING PROTEIN 2 OS=Arabidopsis thaliana GN=PDCB2 PE=1 SV=1	54.5	3e-26
TRINITY_DN17789_c0_g1	sp|Q23892|GLUA_DICDI	gluA	Lysosomal beta glucosidase OS=Dictyostelium discoideum GN=gluA PE=1 SV=2	48.1	1.4e-07
TRINITY_DN17791_c0_g5	sp|Q9ZNS1|RS7_AVIMR	RPS7	40S ribosomal protein S7 OS=Avicennia marina GN=RPS7 PE=2 SV=1	83.7	6.4e-87
TRINITY_DN17792_c0_g1	sp|P26690|6DCS_SOYBN	-	NAD(P)H-dependent 6'-deoxychalcone synthase OS=Glycine max PE=1 SV=1	100	2e-181
TRINITY_DN17793_c3_g6	sp|Q0VCZ3|YTHD2_BOVIN	YTHDF2	YTH domain-containing family protein 2 OS=Bos taurus GN=YTHDF2 PE=2 SV=1	56.3	8.4e-40
TRINITY_DN17795_c1_g1	sp|Q43463|RAB7_SOYBN	-	Ras-related protein Rab7 OS=Glycine max PE=2 SV=1	90.5	4.8e-77
TRINITY_DN17795_c1_g6	sp|O27628|APGM1_METTH	apgM1	2,3-bisphosphoglycerate-independent phosphoglycerate mutase 1 OS=Methanothermobacter thermautotrophicus (strain ATCC 29096 / DSM 1053 / JCM 10044 / NBRC 100330 / Delta H) GN=apgM1 PE=3 SV=1	38.4	1.7e-69
TRINITY_DN17795_c1_g9	sp|Q38922|RAB1B_ARATH	RABB1B	Ras-related protein RABB1b OS=Arabidopsis thaliana GN=RABB1B PE=2 SV=1	96.4	2.6e-59
TRINITY_DN17801_c0_g2	sp|O81769|DPH5_ARATH	At4g31790	Probable diphthine methyl ester synthase OS=Arabidopsis thaliana GN=At4g31790 PE=2 SV=1	83.4	6e-128
TRINITY_DN17802_c0_g1	sp|Q9LEB4|RBP45_NICPL	RBP45	Polyadenylate-binding protein RBP45 OS=Nicotiana plumbaginifolia GN=RBP45 PE=1 SV=1	68.4	2.9e-26
TRINITY_DN17802_c1_g1	sp|Q9LEB4|RBP45_NICPL	RBP45	Polyadenylate-binding protein RBP45 OS=Nicotiana plumbaginifolia GN=RBP45 PE=1 SV=1	76.5	2.7e-23
TRINITY_DN17802_c1_g3	sp|Q9LEB4|RBP45_NICPL	RBP45	Polyadenylate-binding protein RBP45 OS=Nicotiana plumbaginifolia GN=RBP45 PE=1 SV=1	73.6	8.8e-25
TRINITY_DN17802_c2_g2	sp|Q8L611|SC31B_ARATH	SEC31B	Protein transport protein SEC31 homolog B OS=Arabidopsis thaliana GN=SEC31B PE=1 SV=1	54.4	2.8e-100
TRINITY_DN17803_c1_g3	sp|Q9M2J9|BET11_ARATH	BET11	Bet1-like SNARE 1-1 OS=Arabidopsis thaliana GN=BET11 PE=1 SV=1	84.3	5.5e-25
TRINITY_DN17804_c0_g1	sp|P62247|RS8_DANRE	rps8	40S ribosomal protein S8 OS=Danio rerio GN=rps8 PE=2 SV=2	86.5	1.6e-101
TRINITY_DN17805_c1_g1	sp|P00397|COX1_MOUSE	Mtco1	Cytochrome c oxidase subunit 1 OS=Mus musculus GN=Mtco1 PE=1 SV=2	91.7	8.1e-261
TRINITY_DN17805_c1_g2	sp|Q9MIY8|COX1_DANRE	mt-co1	Cytochrome c oxidase subunit 1 OS=Danio rerio GN=mt-co1 PE=2 SV=1	88.8	1.4e-255
TRINITY_DN17805_c1_g3	sp|Q6F2Y7|CLPB1_ORYSJ	CLPB1	Chaperone protein ClpB1 OS=Oryza sativa subsp. japonica GN=CLPB1 PE=2 SV=1	85.9	0
TRINITY_DN17805_c1_g4	sp|Q9MIY8|COX1_DANRE	mt-co1	Cytochrome c oxidase subunit 1 OS=Danio rerio GN=mt-co1 PE=2 SV=1	93.8	1.7e-266
TRINITY_DN17806_c0_g2	sp|O48713|SMU2_ARATH	SMU2	Suppressor of mec-8 and unc-52 protein homolog 2 OS=Arabidopsis thaliana GN=SMU2 PE=1 SV=1	65.5	1.6e-186
TRINITY_DN17806_c0_g3	sp|F4IUX6|RENT2_ARATH	UPF2	Regulator of nonsense transcripts UPF2 OS=Arabidopsis thaliana GN=UPF2 PE=2 SV=1	72.3	0
TRINITY_DN17806_c0_g7	sp|Q8LDD3|CUT1D_ARATH	CURT1D	Protein CURVATURE THYLAKOID 1D, chloroplastic OS=Arabidopsis thaliana GN=CURT1D PE=1 SV=1	52	2.4e-24
TRINITY_DN17807_c1_g1	sp|O23252|IF4E1_ARATH	EIF4E1	Eukaryotic translation initiation factor 4E-1 OS=Arabidopsis thaliana GN=EIF4E1 PE=1 SV=1	70	1.1e-86
TRINITY_DN17808_c0_g3	sp|P43644|DNJH_ATRNU	-	DnaJ protein homolog ANJ1 OS=Atriplex nummularia PE=2 SV=1	87.8	2.7e-102
TRINITY_DN17809_c0_g2	sp|Q5XF85|ATL42_ARATH	ATL42	E3 ubiquitin-protein ligase ATL42 OS=Arabidopsis thaliana GN=ATL42 PE=1 SV=2	39.7	3.8e-19
TRINITY_DN17810_c0_g1	sp|P48578|PP2A3_ARATH	PP2A3	Serine/threonine-protein phosphatase PP2A-3 catalytic subunit OS=Arabidopsis thaliana GN=PP2A3 PE=2 SV=1	97	1.2e-140
TRINITY_DN17813_c0_g2	sp|O80844|PMTG_ARATH	At2g45750	Probable methyltransferase PMT16 OS=Arabidopsis thaliana GN=At2g45750 PE=3 SV=1	65	1.8e-259
TRINITY_DN17813_c0_g6	sp|P27608|AROF_TOBAC	DHAPS-1	Phospho-2-dehydro-3-deoxyheptonate aldolase 1, chloroplastic OS=Nicotiana tabacum GN=DHAPS-1 PE=2 SV=1	91.4	4.5e-38
TRINITY_DN17813_c0_g9	sp|Q94EJ6|PMTE_ARATH	At4g18030	Probable methyltransferase PMT14 OS=Arabidopsis thaliana GN=At4g18030 PE=2 SV=1	72.7	8.9e-282
TRINITY_DN17817_c0_g1	sp|Q8L5A7|SOT15_ARATH	SOT15	Cytosolic sulfotransferase 15 OS=Arabidopsis thaliana GN=SOT15 PE=1 SV=1	59.3	1.7e-118
TRINITY_DN17818_c2_g1	sp|Q8L970|P4H7_ARATH	P4H7	Probable prolyl 4-hydroxylase 7 OS=Arabidopsis thaliana GN=P4H7 PE=2 SV=1	73.6	1e-102
TRINITY_DN17818_c2_g2	sp|P46279|RPB7_SOYBN	-	DNA-directed RNA polymerase II subunit RPB7 OS=Glycine max PE=2 SV=1	93.1	1.1e-90
TRINITY_DN17821_c0_g1	sp|Q9C5Z2|EIF3H_ARATH	TIF3H1	Eukaryotic translation initiation factor 3 subunit H OS=Arabidopsis thaliana GN=TIF3H1 PE=1 SV=2	80.5	4.6e-99
TRINITY_DN17822_c0_g1	sp|Q9SR13|FLK_ARATH	FLK	Flowering locus K homology domain OS=Arabidopsis thaliana GN=FLK PE=1 SV=1	55.1	6.9e-112
TRINITY_DN17822_c0_g5	sp|A7LXU3|BGH3B_BACO1	BACOVA_02659	Beta-glucosidase BoGH3B OS=Bacteroides ovatus (strain ATCC 8483 / DSM 1896 / JCM 5824 / NCTC 11153) GN=BACOVA_02659 PE=1 SV=1	32.5	1.8e-78
TRINITY_DN17828_c2_g3	sp|Q9C7F5|NTF2_ARATH	NTF2	Nuclear transport factor 2 OS=Arabidopsis thaliana GN=NTF2 PE=1 SV=1	83.7	4.8e-55
TRINITY_DN17829_c1_g2	sp|Q9SVD7|UEV1D_ARATH	UEV1D	Ubiquitin-conjugating enzyme E2 variant 1D OS=Arabidopsis thaliana GN=UEV1D PE=1 SV=1	87.9	4.3e-21
TRINITY_DN17830_c2_g1	sp|F4JMB8|HIP44_ARATH	HIPP44	Heavy metal-associated isoprenylated plant protein 44 OS=Arabidopsis thaliana GN=HIPP44 PE=2 SV=1	72.7	9.9e-56
TRINITY_DN17830_c2_g2	sp|Q9FWR5|GCA1_ARATH	GAMMACA1	Gamma carbonic anhydrase 1, mitochondrial OS=Arabidopsis thaliana GN=GAMMACA1 PE=1 SV=1	74.3	1.1e-114
TRINITY_DN17832_c0_g4	sp|Q8W4H1|GAT26_ARATH	GATA26	GATA transcription factor 26 OS=Arabidopsis thaliana GN=GATA26 PE=2 SV=1	59.8	3.2e-63
TRINITY_DN17832_c0_g8	sp|Q8W4H1|GAT26_ARATH	GATA26	GATA transcription factor 26 OS=Arabidopsis thaliana GN=GATA26 PE=2 SV=1	50.6	2.3e-69
TRINITY_DN17833_c0_g1	sp|H2DH18|C7A12_PANGI	-	Cytochrome P450 CYP736A12 OS=Panax ginseng PE=2 SV=1	56.8	1.8e-24
TRINITY_DN17833_c0_g2	sp|H2DH18|C7A12_PANGI	-	Cytochrome P450 CYP736A12 OS=Panax ginseng PE=2 SV=1	58.3	9.3e-34
TRINITY_DN17834_c0_g5	sp|Q9MIZ0|NU1M_DANRE	mt-nd1	NADH-ubiquinone oxidoreductase chain 1 OS=Danio rerio GN=mt-nd1 PE=3 SV=1	90.3	6.6e-141
TRINITY_DN17834_c0_g7	sp|P09211|GSTP1_HUMAN	GSTP1	Glutathione S-transferase P OS=Homo sapiens GN=GSTP1 PE=1 SV=2	99.1	8.6e-61
TRINITY_DN17834_c0_g8	sp|Q8IVG9|HUNIN_HUMAN	MT-RNR2	Humanin OS=Homo sapiens GN=MT-RNR2 PE=1 SV=1	100	7.8e-06
TRINITY_DN17836_c0_g4	sp|Q8H157|PTR19_ARATH	NPF4.6	Protein NRT1/ PTR FAMILY 4.6 OS=Arabidopsis thaliana GN=NPF4.6 PE=1 SV=1	73.2	1.3e-238
TRINITY_DN17836_c0_g5	sp|Q2KJ93|CDC42_BOVIN	CDC42	Cell division control protein 42 homolog OS=Bos taurus GN=CDC42 PE=1 SV=1	96.9	5.1e-28
TRINITY_DN17838_c1_g4	sp|Q9BRT8|CBWD1_HUMAN	CBWD1	COBW domain-containing protein 1 OS=Homo sapiens GN=CBWD1 PE=2 SV=1	34.1	4.1e-57
TRINITY_DN17839_c4_g1	sp|P51061|CAPP2_SOYBN	PPC1	Phosphoenolpyruvate carboxylase OS=Glycine max GN=PPC1 PE=2 SV=1	91.1	1.2e-161
TRINITY_DN17839_c4_g2	sp|P29196|CAPP_SOLTU	PPC1	Phosphoenolpyruvate carboxylase OS=Solanum tuberosum GN=PPC1 PE=2 SV=2	87.2	4.1e-119
TRINITY_DN17839_c4_g3	sp|P51061|CAPP2_SOYBN	PPC1	Phosphoenolpyruvate carboxylase OS=Glycine max GN=PPC1 PE=2 SV=1	100	8.4e-33
TRINITY_DN17840_c0_g1	sp|Q9XGZ9|P2C72_ARATH	At5g26010	Probable protein phosphatase 2C 72 OS=Arabidopsis thaliana GN=At5g26010 PE=2 SV=2	60.5	5.2e-64
TRINITY_DN17845_c1_g1	sp|O35493|CLK4_MOUSE	Clk4	Dual specificity protein kinase CLK4 OS=Mus musculus GN=Clk4 PE=1 SV=1	73	3.4e-99
TRINITY_DN17845_c1_g2	sp|P22518|CLK1_MOUSE	Clk1	Dual specificity protein kinase CLK1 OS=Mus musculus GN=Clk1 PE=1 SV=2	81.8	1.3e-13
TRINITY_DN17847_c0_g1	sp|Q9SEU6|TRXM4_ARATH	At3g15360	Thioredoxin M4, chloroplastic OS=Arabidopsis thaliana GN=At3g15360 PE=2 SV=2	52.4	2.3e-46
TRINITY_DN17848_c0_g1	sp|Q8LPN7|RNG1L_ARATH	At3g19950	E3 ubiquitin-protein ligase RING1-like OS=Arabidopsis thaliana GN=At3g19950 PE=1 SV=1	51.1	1.5e-10
TRINITY_DN17849_c0_g2	sp|Q3SPM6|RL25_NITWN	rplY	50S ribosomal protein L25 OS=Nitrobacter winogradskyi (strain ATCC 25391 / DSM 10237 / CIP 104748 / NCIMB 11846 / Nb-255) GN=rplY PE=3 SV=1	32.1	1.3e-20
TRINITY_DN17850_c0_g1	sp|Q9S746|HTH_ARATH	HTH	Protein HOTHEAD OS=Arabidopsis thaliana GN=HTH PE=1 SV=1	51.2	3.8e-92
TRINITY_DN17850_c0_g3	sp|Q9S746|HTH_ARATH	HTH	Protein HOTHEAD OS=Arabidopsis thaliana GN=HTH PE=1 SV=1	50.7	2.6e-73
TRINITY_DN17852_c1_g1	sp|Q54Y41|RS20_DICDI	rps20	40S ribosomal protein S20 OS=Dictyostelium discoideum GN=rps20 PE=3 SV=1	28.7	2e-07
TRINITY_DN17853_c0_g1	sp|Q9LQI7|CIA30_ARATH	At1g17350	Probable complex I intermediate-associated protein 30 OS=Arabidopsis thaliana GN=At1g17350 PE=1 SV=2	80.9	1.3e-108
TRINITY_DN17854_c0_g1	sp|Q6ICY4|MTPC2_ARATH	MTPC2	Metal tolerance protein C2 OS=Arabidopsis thaliana GN=MTPC2 PE=2 SV=1	45.4	1.1e-31
TRINITY_DN17856_c1_g1	sp|O64645|SOC1_ARATH	SOC1	MADS-box protein SOC1 OS=Arabidopsis thaliana GN=SOC1 PE=1 SV=1	66	3.1e-63
TRINITY_DN17857_c1_g2	sp|P10978|POLX_TOBAC	-	Retrovirus-related Pol polyprotein from transposon TNT 1-94 OS=Nicotiana tabacum PE=2 SV=1	39.7	7.4e-64
TRINITY_DN17857_c1_g3	sp|Q67XQ0|Y4424_ARATH	CBSDUF1	DUF21 domain-containing protein At4g14240 OS=Arabidopsis thaliana GN=CBSDUF1 PE=1 SV=1	89.9	2.1e-74
TRINITY_DN17859_c0_g1	sp|Q9LY77|ACA12_ARATH	ACA12	Calcium-transporting ATPase 12, plasma membrane-type OS=Arabidopsis thaliana GN=ACA12 PE=2 SV=1	72.2	1.6e-228
TRINITY_DN17859_c0_g2	sp|Q9LY77|ACA12_ARATH	ACA12	Calcium-transporting ATPase 12, plasma membrane-type OS=Arabidopsis thaliana GN=ACA12 PE=2 SV=1	61.8	8.9e-151
TRINITY_DN17860_c0_g3	sp|Q9XGI9|AGUB_SOLLC	CPA	N-carbamoylputrescine amidase OS=Solanum lycopersicum GN=CPA PE=2 SV=1	88.3	1.5e-72
TRINITY_DN17861_c0_g1	sp|Q93VG8|PPDEX_ARATH	At4g17486	DeSI-like protein At4g17486 OS=Arabidopsis thaliana GN=At4g17486 PE=2 SV=1	54.1	2.3e-56
TRINITY_DN17863_c0_g1	sp|Q8RWN2|ZIF1_ARATH	ZIF1	Protein ZINC INDUCED FACILITATOR 1 OS=Arabidopsis thaliana GN=ZIF1 PE=1 SV=2	60.1	7.1e-109
TRINITY_DN17863_c0_g2	sp|Q3EAQ5|PTR36_ARATH	ZIFL2	Probable peptide/nitrate transporter At3g43790 OS=Arabidopsis thaliana GN=ZIFL2 PE=2 SV=2	55.8	6.5e-24
TRINITY_DN17864_c0_g1	sp|Q8W1X2|PDXK_ARATH	PK	Pyridoxal kinase OS=Arabidopsis thaliana GN=PK PE=1 SV=2	80.9	8.2e-115
TRINITY_DN17865_c0_g1	sp|D7STK2|GATC_VITVI	GATC	Glutamyl-tRNA(Gln) amidotransferase subunit C, chloroplastic/mitochondrial OS=Vitis vinifera GN=GATC PE=3 SV=1	55.2	1.6e-35
TRINITY_DN17866_c0_g1	sp|Q5Z9Z0|BGL24_ORYSJ	BGLU24	Beta-glucosidase 24 OS=Oryza sativa subsp. japonica GN=BGLU24 PE=2 SV=1	40.7	1.9e-21
TRINITY_DN17867_c0_g1	sp|Q93ZN9|DAPAT_ARATH	DAP	LL-diaminopimelate aminotransferase, chloroplastic OS=Arabidopsis thaliana GN=DAP PE=1 SV=1	82.9	1.3e-224
TRINITY_DN17868_c0_g3	sp|Q9EPC6|PROF2_RAT	Pfn2	Profilin-2 OS=Rattus norvegicus GN=Pfn2 PE=1 SV=3	37	8.2e-21
TRINITY_DN17872_c0_g1	sp|A5UMN6|DADD_METS3	dadD	5'-deoxyadenosine deaminase OS=Methanobrevibacter smithii (strain ATCC 35061 / DSM 861 / OCM 144 / PS) GN=dadD PE=3 SV=1	37	4e-34
TRINITY_DN17873_c2_g3	sp|Q9LND7|SKI16_ARATH	SKIP16	F-box protein SKIP16 OS=Arabidopsis thaliana GN=SKIP16 PE=1 SV=1	57.1	1.4e-147
TRINITY_DN17873_c2_g7	sp|Q76E23|IF4G_ARATH	EIF4G	Eukaryotic translation initiation factor 4G OS=Arabidopsis thaliana GN=EIF4G PE=1 SV=2	36.3	1.6e-31
TRINITY_DN17877_c0_g1	sp|Q6KAJ8|RL391_ORYSJ	RPL39A	60S ribosomal protein L39-1 OS=Oryza sativa subsp. japonica GN=RPL39A PE=3 SV=2	96	1.4e-21
TRINITY_DN17877_c0_g4	sp|Q39221|STLP2_ARATH	STL2P	SEC12-like protein 2 OS=Arabidopsis thaliana GN=STL2P PE=1 SV=4	48.7	5.2e-89
TRINITY_DN17879_c0_g1	sp|O81832|Y4729_ARATH	At4g27290	G-type lectin S-receptor-like serine/threonine-protein kinase At4g27290 OS=Arabidopsis thaliana GN=At4g27290 PE=3 SV=4	48.6	2.6e-183
TRINITY_DN17879_c0_g2	sp|O65451|FB333_ARATH	At4g22030	Probable F-box protein At4g22030 OS=Arabidopsis thaliana GN=At4g22030 PE=4 SV=1	46	2e-79
TRINITY_DN17879_c0_g4	sp|P93788|REMO_SOLTU	-	Remorin OS=Solanum tuberosum PE=1 SV=1	59.2	3.4e-10
TRINITY_DN17879_c0_g7	sp|P17840|SLSG3_BRAOL	SLSG	S-locus-specific glycoprotein S13 OS=Brassica oleracea GN=SLSG PE=2 SV=2	50	5.2e-13
TRINITY_DN17880_c0_g1	sp|Q9Y2Z9|COQ6_HUMAN	COQ6	Ubiquinone biosynthesis monooxygenase COQ6, mitochondrial OS=Homo sapiens GN=COQ6 PE=1 SV=2	41.7	5.2e-50
TRINITY_DN17882_c0_g6	sp|Q6R8G3|PHO17_ARATH	PHO1-H7	Phosphate transporter PHO1 homolog 7 OS=Arabidopsis thaliana GN=PHO1-H7 PE=2 SV=1	72.2	2.4e-25
TRINITY_DN17882_c0_g7	sp|Q9SAK4|SSDH_ARATH	ALDH5F1	Succinate-semialdehyde dehydrogenase, mitochondrial OS=Arabidopsis thaliana GN=ALDH5F1 PE=1 SV=2	77.4	7.9e-103
TRINITY_DN17883_c0_g1	sp|P10053|RBS_PINTH	RBCS	Ribulose bisphosphate carboxylase small chain, chloroplastic OS=Pinus thunbergii GN=RBCS PE=2 SV=1	51.8	4e-52
TRINITY_DN17886_c0_g1	sp|Q9C9Z1|ZTP50_ARATH	At3g08650	Putative zinc transporter At3g08650 OS=Arabidopsis thaliana GN=At3g08650 PE=2 SV=2	78.1	8.1e-112
TRINITY_DN17887_c0_g1	sp|P25866|UBC2_WHEAT	UBC2	Ubiquitin-conjugating enzyme E2 2 OS=Triticum aestivum GN=UBC2 PE=1 SV=1	100	2.8e-36
TRINITY_DN17887_c2_g3	sp|P35130|UBC2_MEDSA	UBC2	Ubiquitin-conjugating enzyme E2 2 OS=Medicago sativa GN=UBC2 PE=2 SV=1	83	2.4e-16
TRINITY_DN17892_c0_g1	sp|Q9ZUH1|Y2424_ARATH	At2g24240	BTB/POZ domain-containing protein At2g24240 OS=Arabidopsis thaliana GN=At2g24240 PE=2 SV=1	81.9	3.9e-229
TRINITY_DN17893_c1_g1	sp|Q9FL59|FTIP1_ARATH	FTIP1	FT-interacting protein 1 OS=Arabidopsis thaliana GN=FTIP1 PE=1 SV=1	58.3	3e-34
TRINITY_DN17893_c1_g2	sp|Q0JLP9|P2C06_ORYSJ	Os01g0583100	Probable protein phosphatase 2C 6 OS=Oryza sativa subsp. japonica GN=Os01g0583100 PE=1 SV=1	54.6	1.3e-22
TRINITY_DN17893_c1_g3	sp|P0CS19|PMP3_CRYNB	PMP3	Plasma membrane proteolipid 3 OS=Cryptococcus neoformans var. neoformans serotype D (strain B-3501A) GN=PMP3 PE=3 SV=1	91.7	1.8e-17
TRINITY_DN17893_c1_g4	sp|P59583|WRK32_ARATH	WRKY32	Probable WRKY transcription factor 32 OS=Arabidopsis thaliana GN=WRKY32 PE=2 SV=1	46.1	5.4e-68
TRINITY_DN17894_c0_g1	sp|O82531|PSB1_PETHY	PBF1	Proteasome subunit beta type-1 OS=Petunia hybrida GN=PBF1 PE=2 SV=1	89.2	1.9e-113
TRINITY_DN17896_c0_g1	sp|P23706|DEFA_ANTMA	DEFA	Floral homeotic protein DEFICIENS OS=Antirrhinum majus GN=DEFA PE=1 SV=1	63.1	6.3e-73
TRINITY_DN17897_c0_g1	sp|Q8GWH5|RTNLT_ARATH	RTNLB22	Reticulon-like protein B22 OS=Arabidopsis thaliana GN=RTNLB22 PE=2 SV=1	77.9	3.5e-51
TRINITY_DN17898_c1_g1	sp|P31582|RAF2A_ARATH	RABF2A	Ras-related protein RABF2a OS=Arabidopsis thaliana GN=RABF2A PE=1 SV=1	92.2	5.6e-82
TRINITY_DN17900_c0_g3	sp|Q05024|TRI1_YEAST	TRI1	Protein TRI1 OS=Saccharomyces cerevisiae (strain ATCC 204508 / S288c) GN=TRI1 PE=1 SV=1	45.2	1.1e-14
TRINITY_DN17900_c0_g4	sp|Q9SNY3|GMD1_ARATH	GMD1	GDP-mannose 4,6 dehydratase 1 OS=Arabidopsis thaliana GN=GMD1 PE=1 SV=1	86	4.8e-181
TRINITY_DN17900_c0_g5	sp|P93031|GMD2_ARATH	MUR1	GDP-mannose 4,6 dehydratase 2 OS=Arabidopsis thaliana GN=MUR1 PE=1 SV=3	80.3	7.5e-51
TRINITY_DN17901_c0_g1	sp|Q7DLR9|PSB4_ARATH	PBG1	Proteasome subunit beta type-4 OS=Arabidopsis thaliana GN=PBG1 PE=1 SV=2	85.2	1.7e-117
TRINITY_DN17903_c0_g1	sp|Q9FLC0|PER52_ARATH	PER52	Peroxidase 52 OS=Arabidopsis thaliana GN=PER52 PE=2 SV=1	73.8	5.1e-107
TRINITY_DN17904_c0_g4	sp|A2YR10|ARP4_ORYSI	ARP4	Actin-related protein 4 OS=Oryza sativa subsp. indica GN=ARP4 PE=3 SV=2	100	9.6e-48
TRINITY_DN17907_c0_g9	sp|Q8VWF1|SH3P2_ARATH	SH3P2	SH3 domain-containing protein 2 OS=Arabidopsis thaliana GN=SH3P2 PE=1 SV=1	83.8	1.5e-26
TRINITY_DN17908_c0_g1	sp|Q9S7A3|MOC2A_ARATH	At4g10100	Molybdopterin synthase sulfur carrier subunit OS=Arabidopsis thaliana GN=At4g10100 PE=2 SV=1	65.5	4.2e-25
TRINITY_DN17909_c1_g6	sp|P51850|PDC1_PEA	PDC1	Pyruvate decarboxylase 1 OS=Pisum sativum GN=PDC1 PE=2 SV=1	83.9	2.5e-96
TRINITY_DN17912_c0_g1	sp|Q94JQ6|CESA6_ARATH	CESA6	Cellulose synthase A catalytic subunit 6 [UDP-forming] OS=Arabidopsis thaliana GN=CESA6 PE=1 SV=2	64.4	1.8e-23
TRINITY_DN17912_c0_g2	sp|O48947|CESA2_ARATH	CESA2	Cellulose synthase A catalytic subunit 2 [UDP-forming] OS=Arabidopsis thaliana GN=CESA2 PE=1 SV=1	82.9	5.3e-148
TRINITY_DN17912_c0_g3	sp|A2XNT2|CESA5_ORYSI	CESA5	Probable cellulose synthase A catalytic subunit 5 [UDP-forming] OS=Oryza sativa subsp. indica GN=CESA5 PE=3 SV=1	85.5	4.5e-35
TRINITY_DN17912_c0_g6	sp|Q6YVM4|CESA6_ORYSJ	CESA6	Probable cellulose synthase A catalytic subunit 6 [UDP-forming] OS=Oryza sativa subsp. japonica GN=CESA6 PE=2 SV=1	100	4e-51
TRINITY_DN17912_c0_g7	sp|A2XN66|CESA2_ORYSI	CESA2	Probable cellulose synthase A catalytic subunit 2 [UDP-forming] OS=Oryza sativa subsp. indica GN=CESA2 PE=3 SV=1	91.4	9e-127
TRINITY_DN17912_c0_g8	sp|Q9SJ22|CESA9_ARATH	CESA9	Probable cellulose synthase A catalytic subunit 9 [UDP-forming] OS=Arabidopsis thaliana GN=CESA9 PE=2 SV=1	82.7	7e-75
TRINITY_DN17913_c0_g1	sp|Q06364|PSMD3_DAUCA	21D7	Probable 26S proteasome non-ATPase regulatory subunit 3 OS=Daucus carota GN=21D7 PE=1 SV=2	69.7	8.3e-28
TRINITY_DN17913_c0_g2	sp|Q06364|PSMD3_DAUCA	21D7	Probable 26S proteasome non-ATPase regulatory subunit 3 OS=Daucus carota GN=21D7 PE=1 SV=2	94.5	1.8e-246
TRINITY_DN17914_c0_g1	sp|Q9FIQ5|TRN2_ARATH	TRN2	Protein TORNADO 2 OS=Arabidopsis thaliana GN=TRN2 PE=1 SV=1	73.6	1.4e-106
TRINITY_DN17917_c0_g1	sp|Q9FK88|INVE_ARATH	INVE	Alkaline/neutral invertase E, chloroplastic OS=Arabidopsis thaliana GN=INVE PE=1 SV=1	75.9	5.8e-85
TRINITY_DN17919_c2_g1	sp|Q6Q151|CYP59_ARATH	CYP59	Peptidyl-prolyl cis-trans isomerase CYP59 OS=Arabidopsis thaliana GN=CYP59 PE=1 SV=1	53	8.6e-27
TRINITY_DN17919_c2_g3	sp|Q9DC48|PRP17_MOUSE	Cdc40	Pre-mRNA-processing factor 17 OS=Mus musculus GN=Cdc40 PE=2 SV=1	35.5	7.8e-54
TRINITY_DN17919_c2_g4	sp|O60508|PRP17_HUMAN	CDC40	Pre-mRNA-processing factor 17 OS=Homo sapiens GN=CDC40 PE=1 SV=1	68	2.9e-91
TRINITY_DN17920_c0_g3	sp|Q9SJ22|CESA9_ARATH	CESA9	Probable cellulose synthase A catalytic subunit 9 [UDP-forming] OS=Arabidopsis thaliana GN=CESA9 PE=2 SV=1	92.2	3.9e-110
TRINITY_DN17921_c0_g1	sp|Q9H6Q3|SLAP2_HUMAN	SLA2	Src-like-adapter 2 OS=Homo sapiens GN=SLA2 PE=1 SV=3	44.4	1.7e-57
TRINITY_DN17922_c1_g4	sp|B9HBA8|ACCC1_POPTR	POPTRDRAFT_831870	Biotin carboxylase 1, chloroplastic OS=Populus trichocarpa GN=POPTRDRAFT_831870 PE=2 SV=1	87.8	8.4e-187
TRINITY_DN17924_c0_g1	sp|P93822|ERF97_ARATH	ERF14	Ethylene-responsive transcription factor 14 OS=Arabidopsis thaliana GN=ERF14 PE=2 SV=1	58.6	9.3e-26
TRINITY_DN17924_c1_g1	sp|Q9S7P9|SNP33_ARATH	SNAP33	SNAP25 homologous protein SNAP33 OS=Arabidopsis thaliana GN=SNAP33 PE=1 SV=1	79.3	3.3e-31
TRINITY_DN17924_c1_g2	sp|P18566|RBS2_ORYSJ	RBCS-A	Ribulose bisphosphate carboxylase small chain A, chloroplastic OS=Oryza sativa subsp. japonica GN=RBCS-A PE=2 SV=2	100	1.4e-100
TRINITY_DN17924_c1_g3	sp|Q9S7P9|SNP33_ARATH	SNAP33	SNAP25 homologous protein SNAP33 OS=Arabidopsis thaliana GN=SNAP33 PE=1 SV=1	64.4	7.6e-19
TRINITY_DN17925_c1_g1	sp|Q9SRV1|BPM4_ARATH	BPM4	BTB/POZ and MATH domain-containing protein 4 OS=Arabidopsis thaliana GN=BPM4 PE=1 SV=1	65.8	1.2e-146
TRINITY_DN17925_c1_g2	sp|Q9SRV1|BPM4_ARATH	BPM4	BTB/POZ and MATH domain-containing protein 4 OS=Arabidopsis thaliana GN=BPM4 PE=1 SV=1	67.3	5.9e-148
TRINITY_DN17930_c1_g1	sp|Q0QLE4|DML_EUBBA	Dml	2,3-dimethylmalate lyase OS=Eubacterium barkeri GN=Dml PE=1 SV=1	42.2	1.1e-53
TRINITY_DN17932_c0_g1	sp|Q8LC95|ENL3_ARATH	At5g25090	Early nodulin-like protein 3 OS=Arabidopsis thaliana GN=At5g25090 PE=1 SV=2	53.1	2.7e-14
TRINITY_DN17934_c0_g1	sp|P46778|RL21_HUMAN	RPL21	60S ribosomal protein L21 OS=Homo sapiens GN=RPL21 PE=1 SV=2	100	6.4e-88
TRINITY_DN17934_c0_g10	sp|Q34941|COX1_LUMTE	COI	Cytochrome c oxidase subunit 1 OS=Lumbricus terrestris GN=COI PE=3 SV=1	85.3	1.9e-85
TRINITY_DN17934_c0_g2	sp|P00395|COX1_HUMAN	MT-CO1	Cytochrome c oxidase subunit 1 OS=Homo sapiens GN=MT-CO1 PE=1 SV=1	92.1	1.4e-260
TRINITY_DN17934_c0_g6	sp|Q34941|COX1_LUMTE	COI	Cytochrome c oxidase subunit 1 OS=Lumbricus terrestris GN=COI PE=3 SV=1	81.5	9.7e-31
TRINITY_DN17934_c0_g7	sp|P62753|RS6_HUMAN	RPS6	40S ribosomal protein S6 OS=Homo sapiens GN=RPS6 PE=1 SV=1	100	3.5e-92
TRINITY_DN17934_c0_g8	sp|Q90YR8|RS6_ICTPU	rps6	40S ribosomal protein S6 OS=Ictalurus punctatus GN=rps6 PE=2 SV=1	98.2	3.7e-89
TRINITY_DN17935_c0_g1	sp|Q56YN3|NADK1_ARATH	NADK1	NAD(H) kinase 1 OS=Arabidopsis thaliana GN=NADK1 PE=1 SV=2	63.5	5.8e-186
TRINITY_DN17940_c0_g4	sp|P14323|GLUB1_ORYSJ	GluB1-A	Glutelin type-B 1 OS=Oryza sativa subsp. japonica GN=GluB1-A PE=2 SV=3	99.2	9.1e-276
TRINITY_DN17940_c0_g6	sp|Q2QWK9|TPS1_ORYSJ	Os12g0192500	Probable thiamine biosynthetic bifunctional enzyme, chloroplastic OS=Oryza sativa subsp. japonica GN=Os12g0192500 PE=2 SV=2	81.5	2.7e-17
TRINITY_DN17940_c0_g7	sp|P0DM41|ACT1_CAEEL	act-1	Actin-1 OS=Caenorhabditis elegans GN=act-1 PE=1 SV=1	100	2.3e-15
TRINITY_DN17943_c0_g1	sp|Q9CA40|NUDT1_ARATH	NUDT1	Nudix hydrolase 1 OS=Arabidopsis thaliana GN=NUDT1 PE=1 SV=1	56.8	1.8e-41
TRINITY_DN17943_c0_g2	sp|Q9C8Z4|HEAT1_ARATH	At3g06530	Uncharacterized protein At3g06530 OS=Arabidopsis thaliana GN=At3g06530 PE=1 SV=3	46.4	0
TRINITY_DN17943_c0_g4	sp|O80952|PGPS1_ARATH	PGPS1	CDP-diacylglycerol--glycerol-3-phosphate 3-phosphatidyltransferase 1, chloroplastic OS=Arabidopsis thaliana GN=PGPS1 PE=1 SV=1	81	8.5e-81
TRINITY_DN17947_c0_g1	sp|Q93Z51|NIC4_ARATH	At3g16190	Probable inactive nicotinamidase At3g16190 OS=Arabidopsis thaliana GN=At3g16190 PE=2 SV=1	72.9	5.1e-73
TRINITY_DN17948_c1_g3	sp|P92974|UBE12_ARATH	UBA2	Ubiquitin-activating enzyme E1 2 OS=Arabidopsis thaliana GN=UBA2 PE=1 SV=1	76.9	7.3e-290
TRINITY_DN17952_c0_g2	sp|Q9T0D6|PP306_ARATH	At4g11690	Pentatricopeptide repeat-containing protein At4g11690 OS=Arabidopsis thaliana GN=At4g11690 PE=2 SV=1	46.4	1e-39
TRINITY_DN17953_c1_g1	sp|F6HQ26|RU1C_VITVI	VIT_07s0104g01170	U1 small nuclear ribonucleoprotein C OS=Vitis vinifera GN=VIT_07s0104g01170 PE=3 SV=1	75.2	7.2e-45
TRINITY_DN17953_c1_g2	sp|O48916|FAH1_ARATH	FAH1	Dihydroceramide fatty acyl 2-hydroxylase FAH1 OS=Arabidopsis thaliana GN=FAH1 PE=1 SV=1	54.7	5.5e-49
TRINITY_DN17953_c1_g4	sp|Q9FLE8|Y5986_ARATH	At5g39865	Uncharacterized protein At5g39865 OS=Arabidopsis thaliana GN=At5g39865 PE=2 SV=1	43.4	1.3e-29
TRINITY_DN17954_c1_g1	sp|Q9SJI7|PLA20_ARATH	At2g42690	Phospholipase A1-IIdelta OS=Arabidopsis thaliana GN=At2g42690 PE=1 SV=1	60.4	8.6e-141
TRINITY_DN17954_c1_g3	sp|Q40746|NIP11_ORYSJ	NIP1-1	Aquaporin NIP1-1 OS=Oryza sativa subsp. japonica GN=NIP1-1 PE=2 SV=1	70.5	4e-35
TRINITY_DN17954_c1_g4	sp|Q9T074|PCKA_ARATH	PCKA	Phosphoenolpyruvate carboxykinase [ATP] OS=Arabidopsis thaliana GN=PCKA PE=1 SV=1	78.5	1.8e-20
TRINITY_DN17956_c0_g2	sp|Q9FG13|CXE15_ARATH	CXE15	Probable carboxylesterase 15 OS=Arabidopsis thaliana GN=CXE15 PE=2 SV=1	49.8	1.8e-55
TRINITY_DN17956_c0_g3	sp|Q9FG13|CXE15_ARATH	CXE15	Probable carboxylesterase 15 OS=Arabidopsis thaliana GN=CXE15 PE=2 SV=1	49.6	5.1e-30
TRINITY_DN17958_c0_g2	sp|Q8TGM7|ART2_YEAST	ART2	Putative uncharacterized protein ART2 OS=Saccharomyces cerevisiae (strain ATCC 204508 / S288c) GN=ART2 PE=5 SV=1	92.7	2.6e-24
TRINITY_DN17958_c0_g3	sp|Q8TGM7|ART2_YEAST	ART2	Putative uncharacterized protein ART2 OS=Saccharomyces cerevisiae (strain ATCC 204508 / S288c) GN=ART2 PE=5 SV=1	66	1.7e-09
TRINITY_DN17960_c0_g1	sp|O80929|RL361_ARATH	RPL36A	60S ribosomal protein L36-1 OS=Arabidopsis thaliana GN=RPL36A PE=2 SV=1	80.4	1.1e-41
TRINITY_DN17960_c0_g3	sp|Q9LZ57|RL363_ARATH	RPL36C	60S ribosomal protein L36-3 OS=Arabidopsis thaliana GN=RPL36C PE=3 SV=1	84.6	1.8e-41
TRINITY_DN17960_c0_g4	sp|P52866|RL36_DAUCA	RPL36	60S ribosomal protein L36 OS=Daucus carota GN=RPL36 PE=3 SV=2	90.1	2.2e-35
TRINITY_DN17962_c0_g1	sp|Q8GZC3|FAD2_VERFO	FAD2	Delta(12)-fatty-acid desaturase FAD2 OS=Vernicia fordii GN=FAD2 PE=1 SV=1	60.6	2.1e-78
TRINITY_DN17962_c0_g2	sp|Q9AT72|FAD2_CALOF	FAD2	Delta(12) fatty acid desaturase FAD2 OS=Calendula officinalis GN=FAD2 PE=2 SV=1	67	2.1e-31
TRINITY_DN17963_c0_g3	sp|Q43062|PME_PRUPE	-	Pectinesterase/pectinesterase inhibitor PPE8B OS=Prunus persica PE=2 SV=1	52.5	1.7e-82
TRINITY_DN17965_c0_g2	sp|O48726|RPN13_ARATH	RPN13	26S proteasome regulatory subunit RPN13 OS=Arabidopsis thaliana GN=RPN13 PE=1 SV=2	64.7	4.3e-53
TRINITY_DN17967_c0_g1	sp|Q940X7|RBX1A_ARATH	RBX1A	RING-box protein 1a OS=Arabidopsis thaliana GN=RBX1A PE=1 SV=1	91.7	4.1e-56
TRINITY_DN17967_c0_g5	sp|Q940X7|RBX1A_ARATH	RBX1A	RING-box protein 1a OS=Arabidopsis thaliana GN=RBX1A PE=1 SV=1	78	5.3e-54
TRINITY_DN17967_c0_g8	sp|Q9FMY3|STPKL_ARATH	At5g23170	Serine/threonine-protein kinase-like protein At5g23170 OS=Arabidopsis thaliana GN=At5g23170 PE=2 SV=1	43.1	6.9e-64
TRINITY_DN17967_c0_g9	sp|Q940X7|RBX1A_ARATH	RBX1A	RING-box protein 1a OS=Arabidopsis thaliana GN=RBX1A PE=1 SV=1	86.9	1.8e-59
TRINITY_DN17972_c0_g1	sp|Q4V8W7|UBTD1_DANRE	ubtd1	Ubiquitin domain-containing protein 1 OS=Danio rerio GN=ubtd1 PE=2 SV=1	49.2	4.6e-24
TRINITY_DN17972_c4_g6	sp|Q9CA86|PEX2_ARATH	PEX2	Peroxisome biogenesis protein 2 OS=Arabidopsis thaliana GN=PEX2 PE=1 SV=1	45.6	4.2e-06
TRINITY_DN17977_c0_g1	sp|Q9SD62|Y3471_ARATH	At3g47110	Putative receptor-like protein kinase At3g47110 OS=Arabidopsis thaliana GN=At3g47110 PE=3 SV=1	49.3	3e-91
TRINITY_DN17980_c0_g1	sp|Q9LQ04|RMLCD_ARATH	NRS/ER	Bifunctional dTDP-4-dehydrorhamnose 3,5-epimerase/dTDP-4-dehydrorhamnose reductase OS=Arabidopsis thaliana GN=NRS/ER PE=1 SV=1	84.8	3.7e-147
TRINITY_DN17980_c0_g3	sp|Q7F8R0|C3H14_ORYSJ	Os02g0194200	Zinc finger CCCH domain-containing protein 14 OS=Oryza sativa subsp. japonica GN=Os02g0194200 PE=2 SV=1	62.8	2.6e-97
TRINITY_DN17980_c0_g5	sp|Q9LQ04|RMLCD_ARATH	NRS/ER	Bifunctional dTDP-4-dehydrorhamnose 3,5-epimerase/dTDP-4-dehydrorhamnose reductase OS=Arabidopsis thaliana GN=NRS/ER PE=1 SV=1	85.8	3.4e-150
TRINITY_DN17981_c2_g1	sp|P27788|FER3_MAIZE	FDX3	Ferredoxin-3, chloroplastic OS=Zea mays GN=FDX3 PE=2 SV=1	66.4	2.3e-51
TRINITY_DN17981_c2_g2	sp|P27788|FER3_MAIZE	FDX3	Ferredoxin-3, chloroplastic OS=Zea mays GN=FDX3 PE=2 SV=1	63.2	7.5e-47
TRINITY_DN17982_c0_g8	sp|Q94EJ2|HDA8_ARATH	HDA8	Histone deacetylase 8 OS=Arabidopsis thaliana GN=HDA8 PE=2 SV=1	65.9	1.3e-32
TRINITY_DN17983_c1_g3	sp|P41917|RAN2_ARATH	RAN2	GTP-binding nuclear protein Ran-2 OS=Arabidopsis thaliana GN=RAN2 PE=1 SV=3	98	1.5e-115
TRINITY_DN17983_c1_g4	sp|P54765|RAN1A_LOTJA	RAN1A	GTP-binding nuclear protein Ran1A (Fragment) OS=Lotus japonicus GN=RAN1A PE=2 SV=1	96.4	8.5e-63
TRINITY_DN17987_c0_g1	sp|Q98SJ7|TCTP_LABRO	tpt1	Translationally-controlled tumor protein homolog OS=Labeo rohita GN=tpt1 PE=2 SV=1	96.5	5.6e-90
TRINITY_DN17988_c0_g2	sp|A2Y053|METK1_ORYSI	SAM1	S-adenosylmethionine synthase 1 OS=Oryza sativa subsp. indica GN=SAM1 PE=2 SV=2	100	1.2e-234
TRINITY_DN17988_c0_g3	sp|A9PEK8|METK3_POPTR	METK3	S-adenosylmethionine synthase 3 OS=Populus trichocarpa GN=METK3 PE=2 SV=1	97.4	6.6e-62
TRINITY_DN17988_c0_g5	sp|A7NVX9|METK2_VITVI	METK2	S-adenosylmethionine synthase 2 OS=Vitis vinifera GN=METK2 PE=3 SV=1	99.3	6.6e-74
TRINITY_DN17989_c0_g1	sp|Q94CF0|EHD1_ARATH	EHD1	EH domain-containing protein 1 OS=Arabidopsis thaliana GN=EHD1 PE=1 SV=1	74.8	2.1e-244
TRINITY_DN17990_c0_g2	sp|Q9SJI8|MBF1A_ARATH	MBF1A	Multiprotein-bridging factor 1a OS=Arabidopsis thaliana GN=MBF1A PE=2 SV=1	84	3.9e-37
TRINITY_DN17990_c0_g4	sp|Q85WB7|GSA_BRANA	GSA	Glutamate-1-semialdehyde 2,1-aminomutase, chloroplastic OS=Brassica napus GN=GSA PE=2 SV=1	83.4	5.8e-225
TRINITY_DN17991_c1_g1	sp|Q9ZWT2|CYB5D_ARATH	CYTB5-D	Cytochrome B5 isoform D OS=Arabidopsis thaliana GN=CYTB5-D PE=1 SV=1	46.3	1.5e-12
TRINITY_DN17992_c0_g1	sp|A2QVV2|CREC_ASPNC	creC	Probable catabolite repression protein creC OS=Aspergillus niger (strain CBS 513.88 / FGSC A1513) GN=creC PE=3 SV=1	26.8	9.4e-08
TRINITY_DN17992_c0_g3	sp|B0Y7H6|CREC_ASPFC	creC	Probable catabolite repression protein creC OS=Neosartorya fumigata (strain CEA10 / CBS 144.89 / FGSC A1163) GN=creC PE=3 SV=2	44.1	1.7e-06
TRINITY_DN17993_c0_g1	sp|Q9LYE3|ASI1_ARATH	ASI1	Protein ANTI-SILENCING 1 OS=Arabidopsis thaliana GN=ASI1 PE=3 SV=2	31.9	5.7e-67
TRINITY_DN18002_c0_g1	sp|Q9SYH2|TAF9_ARATH	TAF9	Transcription initiation factor TFIID subunit 9 OS=Arabidopsis thaliana GN=TAF9 PE=1 SV=1	75.6	3.5e-52
TRINITY_DN18002_c0_g3	sp|Q9SD85|F3PH_ARATH	CYP75B1	Flavonoid 3'-monooxygenase OS=Arabidopsis thaliana GN=CYP75B1 PE=1 SV=1	40.3	1.3e-113
TRINITY_DN18003_c1_g1	sp|O70377|SNP23_RAT	Snap23	Synaptosomal-associated protein 23 OS=Rattus norvegicus GN=Snap23 PE=1 SV=1	57.1	1.7e-07
TRINITY_DN18007_c0_g1	sp|P41381|IF4A8_TOBAC	-	Eukaryotic initiation factor 4A-8 OS=Nicotiana tabacum PE=2 SV=1	92	6.2e-90
TRINITY_DN18008_c0_g1	sp|Q9LSS7|RUBP1_ARATH	NEDP1	NEDD8-specific protease 1 OS=Arabidopsis thaliana GN=NEDP1 PE=2 SV=1	54.1	8.7e-61
TRINITY_DN18010_c0_g10	sp|Q9LH89|Y3885_ARATH	At3g28850	Uncharacterized protein At3g28850 OS=Arabidopsis thaliana GN=At3g28850 PE=3 SV=1	47.7	4.3e-60
TRINITY_DN18010_c0_g11	sp|Q9FLE8|Y5986_ARATH	At5g39865	Uncharacterized protein At5g39865 OS=Arabidopsis thaliana GN=At5g39865 PE=2 SV=1	46.7	5.8e-30
TRINITY_DN18010_c0_g8	sp|Q9LH89|Y3885_ARATH	At3g28850	Uncharacterized protein At3g28850 OS=Arabidopsis thaliana GN=At3g28850 PE=3 SV=1	56.4	1.2e-68
TRINITY_DN18012_c0_g1	sp|Q2V6J9|UFOG7_FRAAN	GT7	UDP-glucose flavonoid 3-O-glucosyltransferase 7 OS=Fragaria ananassa GN=GT7 PE=1 SV=1	59.5	1.3e-20
TRINITY_DN18012_c0_g2	sp|Q9AT54|SCGT_TOBAC	TOGT1	Scopoletin glucosyltransferase OS=Nicotiana tabacum GN=TOGT1 PE=1 SV=1	61.4	5.6e-71
TRINITY_DN18012_c0_g3	sp|Q9LJN8|BUB31_ARATH	BUB3.1	Mitotic checkpoint protein BUB3.1 OS=Arabidopsis thaliana GN=BUB3.1 PE=1 SV=1	75.9	1.5e-153
TRINITY_DN18012_c0_g5	sp|Q9C701|BUB32_ARATH	BUB3.2	Mitotic checkpoint protein BUB3.2 OS=Arabidopsis thaliana GN=BUB3.2 PE=2 SV=1	83	5.2e-168
TRINITY_DN18013_c0_g2	sp|A8MQN2|LNK1_ARATH	LNK1	Protein LNK1 OS=Arabidopsis thaliana GN=LNK1 PE=1 SV=1	51.1	3.2e-28
TRINITY_DN18014_c1_g1	sp|O64477|Y2913_ARATH	At2g19130	G-type lectin S-receptor-like serine/threonine-protein kinase At2g19130 OS=Arabidopsis thaliana GN=At2g19130 PE=2 SV=1	36.8	6.3e-16
TRINITY_DN18014_c2_g1	sp|Q8RWR2|LRP1B_ARATH	LARP1B	La-related protein 1B OS=Arabidopsis thaliana GN=LARP1B PE=1 SV=2	26.7	1.8e-15
TRINITY_DN18015_c1_g1	sp|Q9FUS8|GSTUH_ARATH	GSTU17	Glutathione S-transferase U17 OS=Arabidopsis thaliana GN=GSTU17 PE=2 SV=1	62.5	1.9e-37
TRINITY_DN18016_c1_g2	sp|P49035|SUS1_DAUCA	-	Sucrose synthase isoform 1 OS=Daucus carota PE=2 SV=1	87.6	1.2e-91
TRINITY_DN18016_c1_g4	sp|O23714|PSB2A_ARATH	PBD1	Proteasome subunit beta type-2-A OS=Arabidopsis thaliana GN=PBD1 PE=1 SV=1	83.6	2.5e-70
TRINITY_DN18018_c0_g3	sp|Q7X9A0|RCA1_LARTR	RCA1	Ribulose bisphosphate carboxylase/oxygenase activase 1, chloroplastic OS=Larrea tridentata GN=RCA1 PE=1 SV=1	73.3	7.9e-201
TRINITY_DN18018_c0_g4	sp|Q9STE8|TC753_ARATH	TOC75-3	Protein TOC75-3, chloroplastic OS=Arabidopsis thaliana GN=TOC75-3 PE=1 SV=1	78.9	0
TRINITY_DN18020_c2_g2	sp|Q94K18|Y4966_ARATH	EMB2752	Uncharacterized protein At4g29660 OS=Arabidopsis thaliana GN=EMB2752 PE=4 SV=1	73	5.4e-37
TRINITY_DN18020_c4_g2	sp|Q8VYR9|KEA5_ARATH	KEA5	K(+) efflux antiporter 5 OS=Arabidopsis thaliana GN=KEA5 PE=2 SV=1	60.9	1.9e-08
TRINITY_DN18021_c1_g1	sp|Q9M427|UBP1_NICPL	UBP1	Oligouridylate-binding protein 1 OS=Nicotiana plumbaginifolia GN=UBP1 PE=2 SV=1	83.7	9.9e-184
TRINITY_DN18022_c1_g1	sp|Q647H2|AHY3_ARAHY	-	Arachin Ahy-3 OS=Arachis hypogaea PE=1 SV=1	21.8	2.4e-14
TRINITY_DN18022_c1_g4	sp|Q8W034|RNP1_ARATH	RNP1	Heterogeneous nuclear ribonucleoprotein 1 OS=Arabidopsis thaliana GN=RNP1 PE=1 SV=1	54.9	6.7e-59
TRINITY_DN18022_c1_g6	sp|Q8W034|RNP1_ARATH	RNP1	Heterogeneous nuclear ribonucleoprotein 1 OS=Arabidopsis thaliana GN=RNP1 PE=1 SV=1	53.1	2.9e-32
TRINITY_DN18024_c1_g2	sp|Q7ZVR1|WDR75_DANRE	wdr75	WD repeat-containing protein 75 OS=Danio rerio GN=wdr75 PE=2 SV=2	25.6	3.2e-48
TRINITY_DN18025_c0_g1	sp|Q9LVJ0|UVB31_ARATH	At3g17800	UV-B-induced protein At3g17800, chloroplastic OS=Arabidopsis thaliana GN=At3g17800 PE=2 SV=1	38.8	2e-44
TRINITY_DN18025_c1_g1	sp|C0LGK4|Y2165_ARATH	At2g16250	Probable LRR receptor-like serine/threonine-protein kinase At2g16250 OS=Arabidopsis thaliana GN=At2g16250 PE=2 SV=1	66.2	3.7e-173
TRINITY_DN18025_c1_g3	sp|Q9SZF7|SHR_ARATH	SHR	Protein SHORT-ROOT OS=Arabidopsis thaliana GN=SHR PE=1 SV=1	71.1	2.3e-55
TRINITY_DN18025_c1_g7	sp|Q9SZF7|SHR_ARATH	SHR	Protein SHORT-ROOT OS=Arabidopsis thaliana GN=SHR PE=1 SV=1	68.4	1.2e-96
TRINITY_DN18025_c1_g9	sp|P16064|ICI1_PHAAN	-	Subtilisin inhibitor 1 OS=Phaseolus angularis PE=1 SV=1	50.8	7.7e-12
TRINITY_DN18026_c0_g1	sp|Q9SBQ8|KGLT_PETHY	-	Kaempferol 3-O-beta-D-galactosyltransferase OS=Petunia hybrida PE=1 SV=1	47.9	2e-119
TRINITY_DN18027_c1_g2	sp|Q8GZC3|FAD2_VERFO	FAD2	Delta(12)-fatty-acid desaturase FAD2 OS=Vernicia fordii GN=FAD2 PE=1 SV=1	65.4	4.2e-145
TRINITY_DN18027_c1_g3	sp|Q9AT72|FAD2_CALOF	FAD2	Delta(12) fatty acid desaturase FAD2 OS=Calendula officinalis GN=FAD2 PE=2 SV=1	55.8	1.5e-30
TRINITY_DN18027_c1_g8	sp|Q9XE58|SCL14_ARATH	SCL14	Scarecrow-like protein 14 OS=Arabidopsis thaliana GN=SCL14 PE=2 SV=2	48.4	2.1e-181
TRINITY_DN18027_c1_g9	sp|Q9AT72|FAD2_CALOF	FAD2	Delta(12) fatty acid desaturase FAD2 OS=Calendula officinalis GN=FAD2 PE=2 SV=1	61.2	2.4e-42
TRINITY_DN18028_c1_g3	sp|Q9FWX7|AB11B_ARATH	ABCB11	ABC transporter B family member 11 OS=Arabidopsis thaliana GN=ABCB11 PE=2 SV=1	81.7	5.5e-27
TRINITY_DN18029_c1_g6	sp|Q8RX28|HDA5_ARATH	HDA5	Histone deacetylase 5 OS=Arabidopsis thaliana GN=HDA5 PE=1 SV=1	51.5	1.5e-71
TRINITY_DN18033_c0_g1	sp|Q1JQD2|GRWD1_BOVIN	GRWD1	Glutamate-rich WD repeat-containing protein 1 OS=Bos taurus GN=GRWD1 PE=2 SV=1	43.9	9.5e-80
TRINITY_DN18034_c1_g1	sp|P33324|YKJ1_YEAST	YKL091C	CRAL-TRIO domain-containing protein YKL091C OS=Saccharomyces cerevisiae (strain ATCC 204508 / S288c) GN=YKL091C PE=1 SV=2	33.9	2e-19
TRINITY_DN18034_c1_g3	sp|Q55680|Y005_SYNY3	sll0005	Uncharacterized protein sll0005 OS=Synechocystis sp. (strain PCC 6803 / Kazusa) GN=sll0005 PE=3 SV=1	37.5	1e-120
TRINITY_DN18036_c1_g1	sp|Q8L9C4|KCR1_ARATH	KCR1	Very-long-chain 3-oxoacyl-CoA reductase 1 OS=Arabidopsis thaliana GN=KCR1 PE=1 SV=1	70.3	1.1e-129
TRINITY_DN18036_c1_g3	sp|Q8L9C4|KCR1_ARATH	KCR1	Very-long-chain 3-oxoacyl-CoA reductase 1 OS=Arabidopsis thaliana GN=KCR1 PE=1 SV=1	71.1	1.1e-70
TRINITY_DN18039_c0_g2	sp|Q852L0|HD16N_ORYSJ	HD16	Casein kinase 1-like protein HD16 OS=Oryza sativa subsp. japonica GN=HD16 PE=1 SV=1	84.6	8.4e-115
TRINITY_DN18039_c0_g4	sp|Q852L0|HD16N_ORYSJ	HD16	Casein kinase 1-like protein HD16 OS=Oryza sativa subsp. japonica GN=HD16 PE=1 SV=1	62.7	1.2e-23
TRINITY_DN18039_c0_g5	sp|Q852L0|HD16N_ORYSJ	HD16	Casein kinase 1-like protein HD16 OS=Oryza sativa subsp. japonica GN=HD16 PE=1 SV=1	67.4	8.5e-162
TRINITY_DN18040_c0_g4	sp|Q8LFY8|ATL54_ARATH	ATL54	RING-H2 finger protein ATL54 OS=Arabidopsis thaliana GN=ATL54 PE=2 SV=2	58.1	2.4e-36
TRINITY_DN18041_c0_g4	sp|P93604|LRK10_WHEAT	LRK10	Rust resistance kinase Lr10 OS=Triticum aestivum GN=LRK10 PE=2 SV=1	51.5	6.7e-54
TRINITY_DN18042_c0_g1	sp|P62084|RS7_DANRE	rps7	40S ribosomal protein S7 OS=Danio rerio GN=rps7 PE=2 SV=1	100	3.3e-98
TRINITY_DN18042_c0_g2	sp|A6H769|RS7_BOVIN	RPS7	40S ribosomal protein S7 OS=Bos taurus GN=RPS7 PE=2 SV=1	100	2e-80
TRINITY_DN18045_c2_g2	sp|Q6TH15|EIF3D_DANRE	eif3d	Eukaryotic translation initiation factor 3 subunit D OS=Danio rerio GN=eif3d PE=2 SV=1	98.8	7.7e-44
TRINITY_DN18045_c2_g3	sp|Q6TH15|EIF3D_DANRE	eif3d	Eukaryotic translation initiation factor 3 subunit D OS=Danio rerio GN=eif3d PE=2 SV=1	100	1.7e-142
TRINITY_DN18046_c0_g1	sp|Q9KG32|Y283_BACHD	BH0283	Uncharacterized isomerase BH0283 OS=Bacillus halodurans (strain ATCC BAA-125 / DSM 18197 / FERM 7344 / JCM 9153 / C-125) GN=BH0283 PE=3 SV=1	60.6	1e-17
TRINITY_DN18047_c2_g2	sp|O57521|HS90B_DANRE	hsp90ab1	Heat shock protein HSP 90-beta OS=Danio rerio GN=hsp90ab1 PE=1 SV=2	94.3	1.6e-51
TRINITY_DN18047_c3_g2	sp|Q9M1J1|FIS1A_ARATH	FIS1A	Mitochondrial fission 1 protein A OS=Arabidopsis thaliana GN=FIS1A PE=1 SV=1	60.4	1.1e-56
TRINITY_DN18047_c3_g5	sp|Q9SK91|BH094_ARATH	BHLH94	Transcription factor bHLH94 OS=Arabidopsis thaliana GN=BHLH94 PE=2 SV=2	46.3	6.8e-31
TRINITY_DN18048_c0_g2	sp|Q28IX8|TBA_XENTR	tuba	Tubulin alpha chain OS=Xenopus tropicalis GN=tuba PE=2 SV=1	89.7	1.6e-31
TRINITY_DN18049_c0_g2	sp|Q9SYK9|U74E2_ARATH	UGT74E2	UDP-glycosyltransferase 74E2 OS=Arabidopsis thaliana GN=UGT74E2 PE=1 SV=1	36.7	1.9e-41
TRINITY_DN18049_c0_g4	sp|Q9SYK9|U74E2_ARATH	UGT74E2	UDP-glycosyltransferase 74E2 OS=Arabidopsis thaliana GN=UGT74E2 PE=1 SV=1	47.9	3.2e-120
TRINITY_DN18049_c0_g5	sp|P0C7P7|U74E1_ARATH	UGT74E1	UDP-glycosyltransferase 74E1 OS=Arabidopsis thaliana GN=UGT74E1 PE=3 SV=1	37.2	5.7e-17
TRINITY_DN18050_c0_g3	sp|A1Z9A2|U587_DROME	CG4646	UPF0587 protein CG4646 OS=Drosophila melanogaster GN=CG4646 PE=2 SV=1	33.7	1.2e-10
TRINITY_DN18050_c0_g4	sp|A1Z9A2|U587_DROME	CG4646	UPF0587 protein CG4646 OS=Drosophila melanogaster GN=CG4646 PE=2 SV=1	32.1	4.4e-17
TRINITY_DN18050_c0_g7	sp|Q9LTA2|AHL17_ARATH	AHL17	AT-hook motif nuclear-localized protein 17 OS=Arabidopsis thaliana GN=AHL17 PE=2 SV=1	49.3	5.3e-54
TRINITY_DN18050_c0_g8	sp|O14240|EAF6_SCHPO	eaf6	Chromatin modification-related protein eaf6 OS=Schizosaccharomyces pombe (strain 972 / ATCC 24843) GN=eaf6 PE=1 SV=1	47.5	2.7e-10
TRINITY_DN18052_c0_g1	sp|Q6RVV4|TIC32_PEA	TIC32	Short-chain dehydrogenase TIC 32, chloroplastic OS=Pisum sativum GN=TIC32 PE=1 SV=1	64.5	3.6e-34
TRINITY_DN18054_c0_g1	sp|Q54T49|APT11_DICDI	DDB_G0282005	Acyl-protein thioesterase 1 homolog 1 OS=Dictyostelium discoideum GN=DDB_G0282005 PE=2 SV=1	35.4	1.5e-27
TRINITY_DN18054_c0_g3	sp|Q6DBG8|ARAD1_ARATH	ARAD1	Probable arabinosyltransferase ARAD1 OS=Arabidopsis thaliana GN=ARAD1 PE=1 SV=1	59.7	8.8e-156
TRINITY_DN18057_c0_g6	sp|P57681|PCYOX_ARATH	FLCY	Farnesylcysteine lyase OS=Arabidopsis thaliana GN=FLCY PE=1 SV=1	66.2	2.1e-18
TRINITY_DN18057_c0_g7	sp|P57681|PCYOX_ARATH	FLCY	Farnesylcysteine lyase OS=Arabidopsis thaliana GN=FLCY PE=1 SV=1	66	7.3e-146
TRINITY_DN18058_c0_g1	sp|B9HCR2|MTNA_POPTR	POPTRDRAFT_832064	Methylthioribose-1-phosphate isomerase OS=Populus trichocarpa GN=POPTRDRAFT_832064 PE=3 SV=2	79.2	1.4e-153
TRINITY_DN18059_c0_g1	sp|Q6H601|RH22_ORYSJ	Os09g0383400	DEAD-box ATP-dependent RNA helicase 22 OS=Oryza sativa subsp. japonica GN=Os09g0383400 PE=2 SV=2	62.9	1.7e-175
TRINITY_DN18060_c0_g1	sp|Q69ZF3|GBA2_MOUSE	Gba2	Non-lysosomal glucosylceramidase OS=Mus musculus GN=Gba2 PE=1 SV=2	44.4	1e-101
TRINITY_DN18060_c0_g2	sp|Q69ZF3|GBA2_MOUSE	Gba2	Non-lysosomal glucosylceramidase OS=Mus musculus GN=Gba2 PE=1 SV=2	53.6	9.1e-63
TRINITY_DN18060_c0_g4	sp|Q69ZF3|GBA2_MOUSE	Gba2	Non-lysosomal glucosylceramidase OS=Mus musculus GN=Gba2 PE=1 SV=2	50.3	6.3e-34
TRINITY_DN18061_c0_g2	sp|Q7XZU0|SAC9_ARATH	SAC9	Probable phosphoinositide phosphatase SAC9 OS=Arabidopsis thaliana GN=SAC9 PE=1 SV=1	77.2	0
TRINITY_DN18061_c0_g4	sp|Q9SZ70|AHL26_ARATH	AHL26	AT-hook motif nuclear-localized protein 26 OS=Arabidopsis thaliana GN=AHL26 PE=2 SV=1	69.3	2.8e-57
TRINITY_DN18061_c0_g6	sp|Q7XZU0|SAC9_ARATH	SAC9	Probable phosphoinositide phosphatase SAC9 OS=Arabidopsis thaliana GN=SAC9 PE=1 SV=1	55.1	6.7e-261
TRINITY_DN18062_c0_g1	sp|Q940D0|ARR1_ARATH	ARR1	Two-component response regulator ARR1 OS=Arabidopsis thaliana GN=ARR1 PE=1 SV=2	68	1.3e-30
TRINITY_DN18064_c0_g1	sp|O60739|EIF1B_HUMAN	EIF1B	Eukaryotic translation initiation factor 1b OS=Homo sapiens GN=EIF1B PE=1 SV=2	91.2	4.5e-56
TRINITY_DN18065_c1_g2	sp|Q0WTI8|DNJ72_ARATH	ATJ72	Chaperone protein dnaJ 72 OS=Arabidopsis thaliana GN=ATJ72 PE=2 SV=1	58	1.5e-17
TRINITY_DN18067_c0_g2	sp|P17407|21KD_DAUCA	-	21 kDa protein OS=Daucus carota PE=2 SV=1	78.8	4.1e-77
TRINITY_DN18068_c0_g1	sp|Q8BMN4|LMLN_MOUSE	Lmln	Leishmanolysin-like peptidase OS=Mus musculus GN=Lmln PE=2 SV=1	29.9	6.2e-25
TRINITY_DN18069_c1_g2	sp|Q2HJI8|RAB8B_BOVIN	RAB8B	Ras-related protein Rab-8B OS=Bos taurus GN=RAB8B PE=2 SV=1	100	5e-44
TRINITY_DN18069_c2_g3	sp|Q6NQJ7|FRS4_ARATH	FRS4	Protein FAR1-RELATED SEQUENCE 4 OS=Arabidopsis thaliana GN=FRS4 PE=2 SV=2	68.9	1e-57
TRINITY_DN18071_c0_g1	sp|Q8GYK7|Y5285_ARATH	At5g14285	TLC domain-containing protein At5g14285 OS=Arabidopsis thaliana GN=At5g14285 PE=2 SV=1	59.4	1.4e-73
TRINITY_DN18072_c0_g2	sp|O42661|SMD1_SCHPO	smd1	Small nuclear ribonucleoprotein Sm D1 OS=Schizosaccharomyces pombe (strain 972 / ATCC 24843) GN=smd1 PE=1 SV=1	77.9	5.7e-24
TRINITY_DN18072_c1_g1	sp|Q9C9X3|ANXD5_ARATH	ANN5	Annexin D5 OS=Arabidopsis thaliana GN=ANN5 PE=2 SV=2	52.4	9.2e-46
TRINITY_DN18072_c1_g7	sp|Q9VU02|SMD1_DROME	SmD1	Probable small nuclear ribonucleoprotein Sm D1 OS=Drosophila melanogaster GN=SmD1 PE=1 SV=1	68.8	9.2e-33
TRINITY_DN18072_c1_g8	sp|P94077|LSD1_ARATH	LSD1	Protein LSD1 OS=Arabidopsis thaliana GN=LSD1 PE=1 SV=1	63.1	2.2e-12
TRINITY_DN18073_c0_g3	sp|A9P822|METK1_POPTR	METK1	S-adenosylmethionine synthase 1 OS=Populus trichocarpa GN=METK1 PE=2 SV=1	95.9	5.9e-226
TRINITY_DN18073_c0_g7	sp|A7Q0V4|METK5_VITVI	METK5	S-adenosylmethionine synthase 5 OS=Vitis vinifera GN=METK5 PE=3 SV=1	96.7	8.9e-28
TRINITY_DN18074_c3_g3	sp|P42067|TIP1_MEDSA	MCP1	Probable aquaporin TIP-type OS=Medicago sativa GN=MCP1 PE=2 SV=2	89.8	6.1e-19
TRINITY_DN18075_c1_g1	sp|Q9XI90|WRKY4_ARATH	WRKY4	Probable WRKY transcription factor 4 OS=Arabidopsis thaliana GN=WRKY4 PE=1 SV=2	43.3	1.2e-75
TRINITY_DN18078_c2_g2	sp|Q9M015|Y5161_ARATH	At5g01610	Uncharacterized protein At5g01610 OS=Arabidopsis thaliana GN=At5g01610 PE=1 SV=1	48.5	9.9e-42
TRINITY_DN18078_c2_g4	sp|Q9FEF8|MD36B_ARATH	MED36B	Probable mediator of RNA polymerase II transcription subunit 36b OS=Arabidopsis thaliana GN=MED36B PE=1 SV=1	41.7	4.9e-27
TRINITY_DN18080_c0_g2	sp|Q9SCV3|BGAL9_ARATH	BGAL9	Beta-galactosidase 9 OS=Arabidopsis thaliana GN=BGAL9 PE=2 SV=1	63.8	3.9e-169
TRINITY_DN18082_c2_g1	sp|Q9SJ54|NHL12_ARATH	NHL12	NDR1/HIN1-like protein 12 OS=Arabidopsis thaliana GN=NHL12 PE=2 SV=1	56.6	1.8e-49
TRINITY_DN18082_c3_g3	sp|Q9FZ95|PUP3_ARATH	PUP3	Purine permease 3 OS=Arabidopsis thaliana GN=PUP3 PE=2 SV=1	65.4	6.4e-14
TRINITY_DN18082_c3_g4	sp|Q9FZ96|PUP1_ARATH	PUP1	Purine permease 1 OS=Arabidopsis thaliana GN=PUP1 PE=1 SV=1	65.9	7.7e-95
TRINITY_DN18082_c3_g6	sp|Q9FZ96|PUP1_ARATH	PUP1	Purine permease 1 OS=Arabidopsis thaliana GN=PUP1 PE=1 SV=1	59.5	8.3e-46
TRINITY_DN18082_c3_g7	sp|Q9FZ96|PUP1_ARATH	PUP1	Purine permease 1 OS=Arabidopsis thaliana GN=PUP1 PE=1 SV=1	69.6	4.3e-12
TRINITY_DN18087_c1_g2	sp|Q9SB50|AP4M_ARATH	AP4M	AP-4 complex subunit mu OS=Arabidopsis thaliana GN=AP4M PE=2 SV=1	84.7	2.5e-92
TRINITY_DN18087_c1_g4	sp|Q9LYX1|LRK82_ARATH	LECRK82	L-type lectin-domain containing receptor kinase VIII.2 OS=Arabidopsis thaliana GN=LECRK82 PE=2 SV=1	29.5	2.5e-20
TRINITY_DN18089_c2_g1	sp|B8XCH5|QKY_ARATH	QKY	Protein QUIRKY OS=Arabidopsis thaliana GN=QKY PE=2 SV=1	59.2	5.6e-16
TRINITY_DN18091_c2_g4	sp|Q9LRW7|IDD11_ARATH	IDD11	Protein indeterminate-domain 11 OS=Arabidopsis thaliana GN=IDD11 PE=2 SV=1	92.1	1.3e-52
TRINITY_DN18092_c0_g1	sp|A2RV01|DPH6_DANRE	dph6	Diphthine--ammonia ligase OS=Danio rerio GN=dph6 PE=2 SV=1	61.5	1.1e-59
TRINITY_DN18094_c0_g1	sp|Q09818|YAC4_SCHPO	SPAC16C9.04c	Putative general negative regulator of transcription C16C9.04c OS=Schizosaccharomyces pombe (strain 972 / ATCC 24843) GN=SPAC16C9.04c PE=3 SV=1	47.6	1.5e-12
TRINITY_DN18094_c0_g5	sp|O22150|SAU36_ARATH	SAUR36	Auxin-responsive protein SAUR36 OS=Arabidopsis thaliana GN=SAUR36 PE=2 SV=1	45.8	1.5e-26
TRINITY_DN18095_c0_g1	sp|Q8VWF1|SH3P2_ARATH	SH3P2	SH3 domain-containing protein 2 OS=Arabidopsis thaliana GN=SH3P2 PE=1 SV=1	81.7	7.3e-31
TRINITY_DN18097_c1_g2	sp|F4IF36|FGT1_ARATH	FGT1	Protein FORGETTER 1 OS=Arabidopsis thaliana GN=FGT1 PE=1 SV=1	77	0
TRINITY_DN18097_c1_g3	sp|F4IF36|FGT1_ARATH	FGT1	Protein FORGETTER 1 OS=Arabidopsis thaliana GN=FGT1 PE=1 SV=1	63.8	1.3e-138
TRINITY_DN18097_c1_g5	sp|Q9M081|SC24B_ARATH	At4g32640	Protein transport protein Sec24-like At4g32640 OS=Arabidopsis thaliana GN=At4g32640 PE=2 SV=3	73	8.5e-63
TRINITY_DN18098_c0_g1	sp|A3B0Y1|MT3B_ORYSJ	MT3B	Metallothionein-like protein 3B OS=Oryza sativa subsp. japonica GN=MT3B PE=2 SV=1	98.5	2.4e-33
TRINITY_DN18098_c0_g2	sp|A2WLS0|MT3A_ORYSI	MT3A	Metallothionein-like protein 3A OS=Oryza sativa subsp. indica GN=MT3A PE=3 SV=1	100	1.2e-31
TRINITY_DN18098_c1_g1	sp|Q8VYK7|ATG8F_ARATH	ATG8F	Autophagy-related protein 8f OS=Arabidopsis thaliana GN=ATG8F PE=1 SV=1	87.8	1.6e-15
TRINITY_DN18098_c1_g2	sp|Q1E4K5|ATG8_COCIM	ATG8	Autophagy-related protein 8 OS=Coccidioides immitis (strain RS) GN=ATG8 PE=3 SV=1	99	4.9e-51
TRINITY_DN18100_c0_g5	sp|P52902|ODPA_PEA	-	Pyruvate dehydrogenase E1 component subunit alpha, mitochondrial OS=Pisum sativum PE=2 SV=1	86.4	9e-50
TRINITY_DN18102_c0_g3	sp|Q9LFQ0|GT14B_ARATH	GLCAT14B	Beta-glucuronosyltransferase GlcAT14B OS=Arabidopsis thaliana GN=GLCAT14B PE=2 SV=1	87	7.4e-100
TRINITY_DN18104_c1_g2	sp|Q39088|DOF34_ARATH	DOF3.4	Dof zinc finger protein DOF3.4 OS=Arabidopsis thaliana GN=DOF3.4 PE=1 SV=2	36.6	1.4e-26
TRINITY_DN18104_c1_g4	sp|D7T737|MTND1_VITVI	VIT_05s0020g04070	1,2-dihydroxy-3-keto-5-methylthiopentene dioxygenase 1 OS=Vitis vinifera GN=VIT_05s0020g04070 PE=3 SV=1	80	7.4e-94
TRINITY_DN18105_c0_g2	sp|P46441|N2B_HAEIR	-	Putative ATPase N2B OS=Haematobia irritans PE=2 SV=1	34.8	1.5e-09
TRINITY_DN18109_c0_g3	sp|B1H2N3|MICU1_XENTR	micu1	Calcium uptake protein 1, mitochondrial OS=Xenopus tropicalis GN=micu1 PE=2 SV=2	32.7	7.6e-45
TRINITY_DN18109_c0_g4	sp|Q9SND9|Y3028_ARATH	At3g50280	Uncharacterized acetyltransferase At3g50280 OS=Arabidopsis thaliana GN=At3g50280 PE=3 SV=1	36.7	4.1e-70
TRINITY_DN18110_c0_g2	sp|Q9LUJ4|PP248_ARATH	At3g22670	Pentatricopeptide repeat-containing protein At3g22670, mitochondrial OS=Arabidopsis thaliana GN=At3g22670 PE=2 SV=1	54.7	6.8e-62
TRINITY_DN18110_c0_g4	sp|Q9LUJ4|PP248_ARATH	At3g22670	Pentatricopeptide repeat-containing protein At3g22670, mitochondrial OS=Arabidopsis thaliana GN=At3g22670 PE=2 SV=1	45	1e-54
TRINITY_DN18111_c0_g1	sp|P32110|GSTX6_SOYBN	HSP26-A	Probable glutathione S-transferase OS=Glycine max GN=HSP26-A PE=2 SV=1	81.3	8.8e-105
TRINITY_DN18112_c0_g1	sp|P10978|POLX_TOBAC	-	Retrovirus-related Pol polyprotein from transposon TNT 1-94 OS=Nicotiana tabacum PE=2 SV=1	35.2	5.4e-06
TRINITY_DN18112_c2_g2	sp|Q05974|RAB1A_LYMST	RAB1A	Ras-related protein Rab-1A OS=Lymnaea stagnalis GN=RAB1A PE=2 SV=1	98.2	8e-26
TRINITY_DN18112_c3_g1	sp|Q9SEH3|RAD2C_ARATH	RABD2C	Ras-related protein RABD2c OS=Arabidopsis thaliana GN=RABD2C PE=2 SV=1	90.4	3.9e-98
TRINITY_DN18113_c0_g1	sp|Q8LDR0|DOF54_ARATH	DOF5.4	Dof zinc finger protein DOF5.4 OS=Arabidopsis thaliana GN=DOF5.4 PE=2 SV=2	52.5	3.4e-34
TRINITY_DN18113_c0_g2	sp|Q9FM03|DOF56_ARATH	DOF5.6	Dof zinc finger protein DOF5.6 OS=Arabidopsis thaliana GN=DOF5.6 PE=2 SV=2	44.7	1e-31
TRINITY_DN18113_c0_g3	sp|O22967|CDF4_ARATH	CDF4	Cyclic dof factor 4 OS=Arabidopsis thaliana GN=CDF4 PE=2 SV=1	65.2	4e-32
TRINITY_DN18113_c0_g6	sp|Q94DB8|PT111_ORYSJ	PHT1-11	Inorganic phosphate transporter 1-11 OS=Oryza sativa subsp. japonica GN=PHT1-11 PE=2 SV=1	73.1	1.2e-206
TRINITY_DN18115_c0_g1	sp|Q9FVR6|Y1222_ARATH	At1g32220	Uncharacterized protein At1g32220, chloroplastic OS=Arabidopsis thaliana GN=At1g32220 PE=2 SV=1	66.7	3.1e-111
TRINITY_DN18116_c0_g1	sp|F4KBP5|CHR4_ARATH	CHR4	Protein CHROMATIN REMODELING 4 OS=Arabidopsis thaliana GN=CHR4 PE=2 SV=1	51.4	0
TRINITY_DN18116_c1_g1	sp|Q94CL9|KRP7_ARATH	KRP7	Cyclin-dependent kinase inhibitor 7 OS=Arabidopsis thaliana GN=KRP7 PE=1 SV=2	50.6	2.7e-14
TRINITY_DN18117_c0_g2	sp|Q5N8Z0|DRB1_ORYSJ	DRB1	Double-stranded RNA-binding protein 1 OS=Oryza sativa subsp. japonica GN=DRB1 PE=2 SV=1	39.8	1.3e-41
TRINITY_DN18118_c0_g2	sp|Q9FZ48|UBC36_ARATH	UBC36	Ubiquitin-conjugating enzyme E2 36 OS=Arabidopsis thaliana GN=UBC36 PE=1 SV=1	98.6	4.5e-33
TRINITY_DN18119_c0_g1	sp|Q8GWW4|GUX2_ARATH	GUX2	UDP-glucuronate:xylan alpha-glucuronosyltransferase 2 OS=Arabidopsis thaliana GN=GUX2 PE=2 SV=1	70.2	5.7e-157
TRINITY_DN18119_c0_g2	sp|Q9SZB2|TIC22_ARATH	TIC22	Protein TIC 22, chloroplastic OS=Arabidopsis thaliana GN=TIC22 PE=1 SV=1	57.3	1.5e-72
TRINITY_DN18119_c0_g3	sp|Q8GWW4|GUX2_ARATH	GUX2	UDP-glucuronate:xylan alpha-glucuronosyltransferase 2 OS=Arabidopsis thaliana GN=GUX2 PE=2 SV=1	46	4.7e-51
TRINITY_DN18120_c1_g1	sp|Q25AG3|LERK3_ORYSI	LECRK3	G-type lectin S-receptor-like serine/threonine-protein kinase LECRK3 OS=Oryza sativa subsp. indica GN=LECRK3 PE=3 SV=2	47.1	3.3e-12
TRINITY_DN18120_c2_g1	sp|O81645|VILI3_ARATH	VLN3	Villin-3 OS=Arabidopsis thaliana GN=VLN3 PE=1 SV=2	83	4.2e-89
TRINITY_DN18120_c2_g2	sp|O04235|SSRP1_VICFA	SSRP1	FACT complex subunit SSRP1 OS=Vicia faba GN=SSRP1 PE=2 SV=1	40.8	2.5e-08
TRINITY_DN18121_c0_g1	sp|F4K4J0|THO5B_ARATH	THO5B	THO complex subunit 5B OS=Arabidopsis thaliana GN=THO5B PE=1 SV=1	62.1	7.4e-95
TRINITY_DN18123_c0_g1	sp|Q94BN2|SPSY_ARATH	SPMS	Spermine synthase OS=Arabidopsis thaliana GN=SPMS PE=1 SV=1	73.3	4.9e-156
TRINITY_DN18125_c3_g10	sp|Q94BP0|SLK2_ARATH	SLK2	Probable transcriptional regulator SLK2 OS=Arabidopsis thaliana GN=SLK2 PE=1 SV=1	45.3	1.3e-25
TRINITY_DN18125_c3_g13	sp|Q94BP0|SLK2_ARATH	SLK2	Probable transcriptional regulator SLK2 OS=Arabidopsis thaliana GN=SLK2 PE=1 SV=1	53.5	1.7e-99
TRINITY_DN18128_c0_g9	sp|Q9FGK0|NDUB8_ARATH	At5g47570	NADH dehydrogenase [ubiquinone] 1 beta subcomplex subunit 8, mitochondrial OS=Arabidopsis thaliana GN=At5g47570 PE=2 SV=1	86.4	4.7e-58
TRINITY_DN18132_c1_g1	sp|Q9LHE5|TO401_ARATH	TOM40-1	Mitochondrial import receptor subunit TOM40-1 OS=Arabidopsis thaliana GN=TOM40-1 PE=1 SV=3	67.8	2.8e-75
TRINITY_DN18133_c0_g1	sp|Q9LRV2|PP256_ARATH	PCMP-A5	Pentatricopeptide repeat-containing protein At3g26540 OS=Arabidopsis thaliana GN=PCMP-A5 PE=2 SV=1	40.7	5.9e-06
TRINITY_DN18136_c2_g1	sp|Q9LUD7|CALS8_ARATH	CALS8	Putative callose synthase 8 OS=Arabidopsis thaliana GN=CALS8 PE=2 SV=2	66.2	7.3e-127
TRINITY_DN18136_c2_g3	sp|Q8W3M4|Y4744_ARATH	At4g06744	Uncharacterized protein At4g06744 OS=Arabidopsis thaliana GN=At4g06744 PE=2 SV=1	50.7	1.4e-39
TRINITY_DN18139_c0_g1	sp|P25868|UBC7_WHEAT	UBC7	Ubiquitin-conjugating enzyme E2 7 OS=Triticum aestivum GN=UBC7 PE=2 SV=1	90.2	6.8e-44
TRINITY_DN18139_c0_g2	sp|Q9C516|XLG3_ARATH	XLG3	Extra-large guanine nucleotide-binding protein 3 OS=Arabidopsis thaliana GN=XLG3 PE=1 SV=1	57.7	6.5e-264
TRINITY_DN18139_c0_g6	sp|Q940Y3|ARID3_ARATH	ARID3	AT-rich interactive domain-containing protein 3 OS=Arabidopsis thaliana GN=ARID3 PE=1 SV=1	67.1	1.7e-23
TRINITY_DN18140_c0_g1	sp|Q9LEU8|ARLY_ARATH	At5g10920	Argininosuccinate lyase, chloroplastic OS=Arabidopsis thaliana GN=At5g10920 PE=2 SV=1	80.5	2.1e-55
TRINITY_DN18140_c0_g3	sp|Q9T0H2|SMAP1_ARATH	SMAP1	Small acidic protein 1 OS=Arabidopsis thaliana GN=SMAP1 PE=1 SV=1	46.9	3.8e-08
TRINITY_DN18143_c1_g2	sp|Q94F58|NAC89_ARATH	NAC089	NAC domain-containing protein 89 OS=Arabidopsis thaliana GN=NAC089 PE=1 SV=1	26.2	3.2e-08
TRINITY_DN18143_c1_g4	sp|Q93Z32|SIPL1_ARATH	SPPL1	Signal peptide peptidase-like 1 OS=Arabidopsis thaliana GN=SPPL1 PE=2 SV=1	75.6	1.8e-154
TRINITY_DN18144_c0_g2	sp|Q8BZT9|LACC1_MOUSE	Lacc1	Laccase domain-containing protein 1 OS=Mus musculus GN=Lacc1 PE=1 SV=1	48.6	1.3e-59
TRINITY_DN18144_c0_g3	sp|Q8BZT9|LACC1_MOUSE	Lacc1	Laccase domain-containing protein 1 OS=Mus musculus GN=Lacc1 PE=1 SV=1	64.8	4.5e-45
TRINITY_DN18150_c0_g1	sp|Q9FLX7|NDUA5_ARATH	At5g52840	Probable NADH dehydrogenase [ubiquinone] 1 alpha subcomplex subunit 5, mitochondrial OS=Arabidopsis thaliana GN=At5g52840 PE=1 SV=1	75.7	1.7e-67
TRINITY_DN18150_c0_g2	sp|Q9ZSA7|DLO2_ARATH	DLO2	Protein DMR6-LIKE OXYGENASE 2 OS=Arabidopsis thaliana GN=DLO2 PE=2 SV=1	36.8	7.4e-53
TRINITY_DN18150_c0_g3	sp|Q9FLX7|NDUA5_ARATH	At5g52840	Probable NADH dehydrogenase [ubiquinone] 1 alpha subcomplex subunit 5, mitochondrial OS=Arabidopsis thaliana GN=At5g52840 PE=1 SV=1	85.2	1.6e-68
TRINITY_DN18150_c0_g4	sp|Q8LG95|PP332_ARATH	EMB1417	Pentatricopeptide repeat-containing protein At4g21190 OS=Arabidopsis thaliana GN=EMB1417 PE=2 SV=1	69.4	7.7e-89
TRINITY_DN18150_c0_g9	sp|Q9FLX7|NDUA5_ARATH	At5g52840	Probable NADH dehydrogenase [ubiquinone] 1 alpha subcomplex subunit 5, mitochondrial OS=Arabidopsis thaliana GN=At5g52840 PE=1 SV=1	77.8	4.9e-69
TRINITY_DN18151_c0_g1	sp|O65660|PLAT1_ARATH	PLAT1	PLAT domain-containing protein 1 OS=Arabidopsis thaliana GN=PLAT1 PE=1 SV=1	64.3	2.9e-53
TRINITY_DN18153_c2_g2	sp|Q9LTC0|PBL19_ARATH	PBL19	Probable serine/threonine-protein kinase PBL19 OS=Arabidopsis thaliana GN=PBL19 PE=1 SV=1	53.9	2.7e-57
TRINITY_DN18155_c0_g1	sp|Q8AVP1|RPF1_XENLA	rpf1	Ribosome production factor 1 OS=Xenopus laevis GN=rpf1 PE=2 SV=1	51.8	3.8e-73
TRINITY_DN18156_c0_g1	sp|Q54KZ8|EIF3M_DICDI	eif3m	Eukaryotic translation initiation factor 3 subunit M OS=Dictyostelium discoideum GN=eif3m PE=1 SV=1	37.3	1.4e-57
TRINITY_DN18157_c1_g2	sp|Q9NX01|TXN4B_HUMAN	TXNL4B	Thioredoxin-like protein 4B OS=Homo sapiens GN=TXNL4B PE=1 SV=1	60.3	7.9e-46
TRINITY_DN18159_c1_g1	sp|Q9LTF2|RS103_ARATH	RPS10C	40S ribosomal protein S10-3 OS=Arabidopsis thaliana GN=RPS10C PE=2 SV=2	85.9	1.4e-41
TRINITY_DN18159_c1_g2	sp|Q9LTZ9|GALS2_ARATH	GALS2	Galactan beta-1,4-galactosyltransferase GALS2 OS=Arabidopsis thaliana GN=GALS2 PE=2 SV=1	66.1	1.9e-39
TRINITY_DN18160_c0_g2	sp|O13747|EPT1_SCHPO	SPAC16E8.13	RING finger protein ETP1 homolog OS=Schizosaccharomyces pombe (strain 972 / ATCC 24843) GN=SPAC16E8.13 PE=3 SV=1	46.2	2.7e-53
TRINITY_DN18160_c0_g4	sp|O13747|EPT1_SCHPO	SPAC16E8.13	RING finger protein ETP1 homolog OS=Schizosaccharomyces pombe (strain 972 / ATCC 24843) GN=SPAC16E8.13 PE=3 SV=1	31.7	2.5e-07
TRINITY_DN18161_c0_g4	sp|Q9M1A8|RPB8B_ARATH	NRPB8B	DNA-directed RNA polymerases II, IV and V subunit 8B OS=Arabidopsis thaliana GN=NRPB8B PE=1 SV=1	46.5	2.5e-30
TRINITY_DN18161_c0_g8	sp|Q9XJ36|CLPR2_ARATH	CLPR2	ATP-dependent Clp protease proteolytic subunit-related protein 2, chloroplastic OS=Arabidopsis thaliana GN=CLPR2 PE=1 SV=1	72.5	9.7e-112
TRINITY_DN18162_c0_g1	sp|Q9SL05|PGR5_ARATH	PGR5	Protein PROTON GRADIENT REGULATION 5, chloroplastic OS=Arabidopsis thaliana GN=PGR5 PE=1 SV=1	74.6	3.8e-39
TRINITY_DN18163_c0_g1	sp|Q9SCN8|CD48D_ARATH	CDC48D	Cell division control protein 48 homolog D OS=Arabidopsis thaliana GN=CDC48D PE=1 SV=1	90	3.6e-61
TRINITY_DN18163_c0_g2	sp|P54774|CDC48_SOYBN	CDC48	Cell division cycle protein 48 homolog OS=Glycine max GN=CDC48 PE=2 SV=1	97	8.1e-148
TRINITY_DN18163_c0_g3	sp|C0LGH3|Y5614_ARATH	At1g56140	Probable LRR receptor-like serine/threonine-protein kinase At1g56140 OS=Arabidopsis thaliana GN=At1g56140 PE=2 SV=2	79.9	4.1e-129
TRINITY_DN18163_c0_g6	sp|P54609|CD48A_ARATH	CDC48A	Cell division control protein 48 homolog A OS=Arabidopsis thaliana GN=CDC48A PE=1 SV=1	97.9	4.4e-191
TRINITY_DN18163_c0_g7	sp|Q7ZU99|TERA_DANRE	vcp	Transitional endoplasmic reticulum ATPase OS=Danio rerio GN=vcp PE=1 SV=1	100	1.8e-28
TRINITY_DN18165_c0_g2	sp|Q39183|D6KL2_ARATH	D6PKL2	Serine/threonine-protein kinase D6PKL2 OS=Arabidopsis thaliana GN=D6PKL2 PE=1 SV=1	75.2	1.3e-196
TRINITY_DN18167_c0_g2	sp|Q9LNG5|PPP7L_ARATH	At1g48120	Serine/threonine-protein phosphatase 7 long form homolog OS=Arabidopsis thaliana GN=At1g48120 PE=2 SV=1	46.6	7.5e-14
TRINITY_DN18168_c0_g1	sp|Q9SUC0|3HIDH_ARATH	At4g20930	Probable 3-hydroxyisobutyrate dehydrogenase, mitochondrial OS=Arabidopsis thaliana GN=At4g20930 PE=2 SV=3	64.5	4.5e-117
TRINITY_DN18169_c0_g1	sp|O22715|AP1M2_ARATH	AP1M2	AP-1 complex subunit mu-2 OS=Arabidopsis thaliana GN=AP1M2 PE=1 SV=1	83.1	7.7e-62
TRINITY_DN18170_c0_g1	sp|O31634|YJCL_BACSU	yjcL	Uncharacterized membrane protein YjcL OS=Bacillus subtilis (strain 168) GN=yjcL PE=4 SV=1	28.4	1.8e-18
TRINITY_DN18171_c1_g1	sp|Q9ZW21|P2C24_ARATH	At2g29380	Probable protein phosphatase 2C 24 OS=Arabidopsis thaliana GN=At2g29380 PE=2 SV=1	63.9	4.4e-106
TRINITY_DN18171_c1_g3	sp|Q7XJJ7|FAAH_ARATH	FAAH	Fatty acid amide hydrolase OS=Arabidopsis thaliana GN=FAAH PE=1 SV=1	63	2.9e-110
TRINITY_DN18172_c0_g2	sp|Q39024|MPK4_ARATH	MPK4	Mitogen-activated protein kinase 4 OS=Arabidopsis thaliana GN=MPK4 PE=1 SV=2	93.2	4.6e-32
TRINITY_DN18172_c1_g1	sp|O82743|AGL19_ARATH	AGL19	Agamous-like MADS-box protein AGL19 OS=Arabidopsis thaliana GN=AGL19 PE=1 SV=1	48.6	9.8e-38
TRINITY_DN18175_c0_g2	sp|Q9FVI1|ADF2_PETHY	ADF2	Actin-depolymerizing factor 2 OS=Petunia hybrida GN=ADF2 PE=2 SV=1	85.5	1.2e-64
TRINITY_DN18175_c0_g4	sp|Q9ZSK3|ADF4_ARATH	ADF4	Actin-depolymerizing factor 4 OS=Arabidopsis thaliana GN=ADF4 PE=1 SV=2	87.8	7.2e-67
TRINITY_DN18176_c0_g5	sp|Q9SNV9|NRAM3_ARATH	NRAMP3	Metal transporter Nramp3 OS=Arabidopsis thaliana GN=NRAMP3 PE=2 SV=2	71.7	3.1e-16
TRINITY_DN18176_c1_g1	sp|A7SXZ6|OSGEP_NEMVE	osgep	Probable tRNA N6-adenosine threonylcarbamoyltransferase OS=Nematostella vectensis GN=osgep PE=3 SV=1	69.6	3.2e-142
TRINITY_DN18177_c0_g3	sp|Q9LFL0|CSLD2_ARATH	CSLD2	Cellulose synthase-like protein D2 OS=Arabidopsis thaliana GN=CSLD2 PE=3 SV=1	87.8	2.6e-152
TRINITY_DN18178_c0_g1	sp|Q9WU56|TRUA_MOUSE	Pus1	tRNA pseudouridine synthase A, mitochondrial OS=Mus musculus GN=Pus1 PE=1 SV=2	35.3	5.1e-56
TRINITY_DN18180_c1_g2	sp|Q7XJJ7|FAAH_ARATH	FAAH	Fatty acid amide hydrolase OS=Arabidopsis thaliana GN=FAAH PE=1 SV=1	65.3	1.1e-234
TRINITY_DN18182_c1_g1	sp|Q8VWG7|TDX_ARATH	TDX	TPR repeat-containing thioredoxin TDX OS=Arabidopsis thaliana GN=TDX PE=1 SV=1	58.9	5.8e-66
TRINITY_DN18182_c1_g2	sp|Q8VWG7|TDX_ARATH	TDX	TPR repeat-containing thioredoxin TDX OS=Arabidopsis thaliana GN=TDX PE=1 SV=1	59.6	4.9e-102
TRINITY_DN18183_c0_g7	sp|Q8W4I4|POT6_ARATH	POT6	Potassium transporter 6 OS=Arabidopsis thaliana GN=POT6 PE=2 SV=1	73.9	7.1e-306
TRINITY_DN18184_c0_g1	sp|Q570X5|ATL58_ARATH	ATL58	RING-H2 finger protein ATL58 OS=Arabidopsis thaliana GN=ATL58 PE=2 SV=1	48.2	6.2e-22
TRINITY_DN18185_c0_g1	sp|Q9C6M2|LHTL6_ARATH	At1g25530	Lysine histidine transporter-like 6 OS=Arabidopsis thaliana GN=At1g25530 PE=2 SV=1	74.4	3.3e-176
TRINITY_DN18186_c1_g1	sp|Q9LTA2|AHL17_ARATH	AHL17	AT-hook motif nuclear-localized protein 17 OS=Arabidopsis thaliana GN=AHL17 PE=2 SV=1	43.3	3.7e-08
TRINITY_DN18186_c1_g2	sp|Q9LTA2|AHL17_ARATH	AHL17	AT-hook motif nuclear-localized protein 17 OS=Arabidopsis thaliana GN=AHL17 PE=2 SV=1	43.4	2.5e-39
TRINITY_DN18186_c1_g4	sp|Q9SQ80|G2OX1_PEA	GA2OX1	Gibberellin 2-beta-dioxygenase 1 OS=Pisum sativum GN=GA2OX1 PE=1 SV=1	67.4	1.4e-116
TRINITY_DN18186_c1_g8	sp|F4I114|Y1960_ARATH	At1g09600	Probable serine/threonine-protein kinase At1g09600 OS=Arabidopsis thaliana GN=At1g09600 PE=3 SV=1	49	6e-06
TRINITY_DN18186_c1_g9	sp|Q9SQ80|G2OX1_PEA	GA2OX1	Gibberellin 2-beta-dioxygenase 1 OS=Pisum sativum GN=GA2OX1 PE=1 SV=1	57	4.9e-20
TRINITY_DN18187_c0_g1	sp|Q8LAL2|IAA26_ARATH	IAA26	Auxin-responsive protein IAA26 OS=Arabidopsis thaliana GN=IAA26 PE=1 SV=2	61.4	4.5e-40
TRINITY_DN18188_c1_g1	sp|P04709|ADT1_MAIZE	ANT1	ADP,ATP carrier protein 1, mitochondrial OS=Zea mays GN=ANT1 PE=2 SV=3	84.1	2.9e-35
TRINITY_DN18188_c2_g1	sp|P27081|ADT2_SOLTU	ANT1	ADP,ATP carrier protein, mitochondrial (Fragment) OS=Solanum tuberosum GN=ANT1 PE=2 SV=1	60.6	1.8e-20
TRINITY_DN18188_c3_g3	sp|P25083|ADT1_SOLTU	ANT	ADP,ATP carrier protein, mitochondrial OS=Solanum tuberosum GN=ANT PE=2 SV=1	78.8	4.3e-169
TRINITY_DN18189_c0_g3	sp|Q6TLJ2|TPD1_ARATH	TPD1	Protein TAPETUM DETERMINANT 1 OS=Arabidopsis thaliana GN=TPD1 PE=1 SV=1	62	1e-21
TRINITY_DN18189_c2_g1	sp|Q8GXG1|ASPGB_ARATH	At3g16150	Probable isoaspartyl peptidase/L-asparaginase 2 OS=Arabidopsis thaliana GN=At3g16150 PE=2 SV=2	80.1	1.5e-123
TRINITY_DN18190_c0_g1	sp|P50156|TIP11_ORYSJ	TIP1-1	Probable aquaporin TIP1-1 OS=Oryza sativa subsp. japonica GN=TIP1-1 PE=2 SV=1	78.8	2e-106
TRINITY_DN18190_c0_g5	sp|Q93249|CAB1_CAEEL	cab-1	Protein cab-1 OS=Caenorhabditis elegans GN=cab-1 PE=1 SV=3	49.4	5.1e-11
TRINITY_DN18192_c0_g1	sp|F4K2F0|EML3_ARATH	EML3	Protein EMSY-LIKE 3 OS=Arabidopsis thaliana GN=EML3 PE=1 SV=1	57.6	1.4e-109
TRINITY_DN18193_c0_g1	sp|Q9LXN4|HIRA_ARATH	HIRA	Protein HIRA OS=Arabidopsis thaliana GN=HIRA PE=1 SV=2	71.2	1.3e-70
TRINITY_DN18193_c0_g5	sp|Q652L2|HIRA_ORYSJ	Os09g0567700	Protein HIRA OS=Oryza sativa subsp. japonica GN=Os09g0567700 PE=2 SV=1	63.7	1e-164
TRINITY_DN18194_c3_g1	sp|Q9SMY8|FBL15_ARATH	FBL15	F-box/LRR-repeat protein 15 OS=Arabidopsis thaliana GN=FBL15 PE=2 SV=2	32.7	4.2e-09
TRINITY_DN18194_c4_g2	sp|Q05462|RL27_PEA	RPL27	60S ribosomal protein L27 OS=Pisum sativum GN=RPL27 PE=2 SV=1	81.5	6e-59
TRINITY_DN18196_c0_g12	sp|Q9LJX0|AB19B_ARATH	ABCB19	ABC transporter B family member 19 OS=Arabidopsis thaliana GN=ABCB19 PE=1 SV=1	90.1	7.2e-166
TRINITY_DN18196_c0_g8	sp|Q9LJX0|AB19B_ARATH	ABCB19	ABC transporter B family member 19 OS=Arabidopsis thaliana GN=ABCB19 PE=1 SV=1	89.4	2.1e-303
TRINITY_DN18197_c1_g1	sp|Q8I7P9|POL5_DROME	pol	Retrovirus-related Pol polyprotein from transposon opus OS=Drosophila melanogaster GN=pol PE=3 SV=1	40	6.6e-20
TRINITY_DN18199_c0_g1	sp|P49690|RL23_ARATH	RPL23A	60S ribosomal protein L23 OS=Arabidopsis thaliana GN=RPL23A PE=2 SV=3	97.1	2.5e-74
TRINITY_DN18199_c0_g5	sp|P49690|RL23_ARATH	RPL23A	60S ribosomal protein L23 OS=Arabidopsis thaliana GN=RPL23A PE=2 SV=3	98.9	1.8e-49
TRINITY_DN18201_c0_g1	sp|Q9SUG7|ATG11_ARATH	ATG11	Autophagy-related protein 11 OS=Arabidopsis thaliana GN=ATG11 PE=1 SV=1	55.4	4e-215
TRINITY_DN18201_c0_g2	sp|Q9SUG7|ATG11_ARATH	ATG11	Autophagy-related protein 11 OS=Arabidopsis thaliana GN=ATG11 PE=1 SV=1	58.5	9.4e-77
TRINITY_DN18203_c2_g1	sp|Q8RXC8|RBK2_ARATH	RBK2	Receptor-like cytosolic serine/threonine-protein kinase RBK2 OS=Arabidopsis thaliana GN=RBK2 PE=1 SV=1	53.5	2.6e-111
TRINITY_DN18205_c0_g1	sp|O74362|ESF2_SCHPO	esf2	Pre-rRNA-processing protein esf2 OS=Schizosaccharomyces pombe (strain 972 / ATCC 24843) GN=esf2 PE=1 SV=1	41.8	1.4e-34
TRINITY_DN18208_c0_g2	sp|Q9FJJ3|SRO5_ARATH	SRO5	Probable inactive poly [ADP-ribose] polymerase SRO5 OS=Arabidopsis thaliana GN=SRO5 PE=1 SV=1	43	6.6e-55
TRINITY_DN18208_c0_g3	sp|Q93YU2|RUS6_ARATH	RUS6	Protein root UVB sensitive 6 OS=Arabidopsis thaliana GN=RUS6 PE=2 SV=1	65	6.2e-79
TRINITY_DN18208_c0_g7	sp|Q93YU2|RUS6_ARATH	RUS6	Protein root UVB sensitive 6 OS=Arabidopsis thaliana GN=RUS6 PE=2 SV=1	54.4	7.3e-35
TRINITY_DN1820_c0_g1	sp|O48726|RPN13_ARATH	RPN13	26S proteasome regulatory subunit RPN13 OS=Arabidopsis thaliana GN=RPN13 PE=1 SV=2	82.9	7e-09
TRINITY_DN18210_c1_g1	sp|Q9FZ52|FDL3_ARATH	At1g16930	F-box/FBD/LRR-repeat protein At1g16930 OS=Arabidopsis thaliana GN=At1g16930 PE=2 SV=1	30	3.9e-36
TRINITY_DN18211_c0_g2	sp|Q8L850|PI5K9_ARATH	PIP5K9	Phosphatidylinositol 4-phosphate 5-kinase 9 OS=Arabidopsis thaliana GN=PIP5K9 PE=1 SV=2	53.1	3.3e-23
TRINITY_DN18213_c0_g4	sp|P85801|TRXH_POPJC	-	Thioredoxin H-type OS=Populus jackii PE=1 SV=1	67.7	6e-52
TRINITY_DN18214_c0_g1	sp|Q42438|CDPK8_ARATH	CPK8	Calcium-dependent protein kinase 8 OS=Arabidopsis thaliana GN=CPK8 PE=1 SV=1	80.4	1.8e-84
TRINITY_DN18215_c0_g1	sp|Q96287|KSG8_ARATH	ASK8	Shaggy-related protein kinase theta OS=Arabidopsis thaliana GN=ASK8 PE=2 SV=3	76.3	1e-136
TRINITY_DN18215_c0_g3	sp|Q96287|KSG8_ARATH	ASK8	Shaggy-related protein kinase theta OS=Arabidopsis thaliana GN=ASK8 PE=2 SV=3	53.7	1.2e-36
TRINITY_DN18219_c1_g1	sp|Q84WG1|NHX3_ARATH	NHX3	Sodium/hydrogen exchanger 3 OS=Arabidopsis thaliana GN=NHX3 PE=2 SV=2	64.7	2.7e-35
TRINITY_DN18219_c1_g2	sp|O82155|DOF17_ARATH	DOF1.7	Dof zinc finger protein DOF1.7 OS=Arabidopsis thaliana GN=DOF1.7 PE=2 SV=1	46.6	1.4e-26
TRINITY_DN18219_c1_g4	sp|Q5M750|VQ4_ARATH	VQ4	VQ motif-containing protein 4 OS=Arabidopsis thaliana GN=VQ4 PE=1 SV=1	50.6	7.5e-45
TRINITY_DN18220_c0_g1	sp|Q6Z8C8|CDKF4_ORYSJ	CDKF-4	Cyclin-dependent kinase F-4 OS=Oryza sativa subsp. japonica GN=CDKF-4 PE=2 SV=1	86.5	3.1e-12
TRINITY_DN18221_c0_g2	sp|Q7PC79|XPOT_ARATH	PSD	Exportin-T OS=Arabidopsis thaliana GN=PSD PE=2 SV=1	70.2	0
TRINITY_DN18223_c0_g1	sp|Q8H0W2|HDA9_ARATH	HDA9	Histone deacetylase 9 OS=Arabidopsis thaliana GN=HDA9 PE=1 SV=1	80.7	2.1e-213
TRINITY_DN18224_c0_g1	sp|Q9ZU32|NADC_ARATH	QPT	Nicotinate-nucleotide pyrophosphorylase [carboxylating], chloroplastic OS=Arabidopsis thaliana GN=QPT PE=2 SV=2	81.7	1e-70
TRINITY_DN18224_c0_g2	sp|Q9ZU32|NADC_ARATH	QPT	Nicotinate-nucleotide pyrophosphorylase [carboxylating], chloroplastic OS=Arabidopsis thaliana GN=QPT PE=2 SV=2	78.3	7.4e-73
TRINITY_DN18229_c0_g2	sp|Q9SA69|Y1301_ARATH	At1g03010	BTB/POZ domain-containing protein At1g03010 OS=Arabidopsis thaliana GN=At1g03010 PE=2 SV=1	69.4	1.2e-219
TRINITY_DN18229_c0_g3	sp|Q9SV21|COPB1_ARATH	At4g31480	Coatomer subunit beta-1 OS=Arabidopsis thaliana GN=At4g31480 PE=2 SV=2	79.3	1.5e-297
TRINITY_DN18230_c0_g2	sp|Q8VY01|SCP46_ARATH	SCPL46	Serine carboxypeptidase-like 46 OS=Arabidopsis thaliana GN=SCPL46 PE=2 SV=1	32.8	1.6e-11
TRINITY_DN18231_c2_g1	sp|Q945K7|IDH5_ARATH	IDH5	Isocitrate dehydrogenase [NAD] catalytic subunit 5, mitochondrial OS=Arabidopsis thaliana GN=IDH5 PE=1 SV=1	82.3	4.3e-177
TRINITY_DN18232_c0_g2	sp|Q40677|ALFP_ORYSJ	ALDP	Fructose-bisphosphate aldolase, chloroplastic OS=Oryza sativa subsp. japonica GN=ALDP PE=1 SV=2	90.2	2e-138
TRINITY_DN18232_c1_g2	sp|Q9ZU52|ALFP3_ARATH	FBA3	Fructose-bisphosphate aldolase 3, chloroplastic OS=Arabidopsis thaliana GN=FBA3 PE=1 SV=1	86.3	7.2e-75
TRINITY_DN18233_c0_g1	sp|P26861|RM06_MARPO	RPL6	60S ribosomal protein L6, mitochondrial OS=Marchantia polymorpha GN=RPL6 PE=3 SV=2	64	3.3e-34
TRINITY_DN18233_c0_g2	sp|Q9XSC3|WDR44_BOVIN	WDR44	WD repeat-containing protein 44 OS=Bos taurus GN=WDR44 PE=1 SV=1	28.6	4e-23
TRINITY_DN18234_c0_g2	sp|Q9ZUN3|KEA4_ARATH	KEA4	K(+) efflux antiporter 4 OS=Arabidopsis thaliana GN=KEA4 PE=2 SV=2	84.3	3.2e-29
TRINITY_DN18237_c0_g1	sp|Q9FKT1|LLG1_ARATH	LLG1	GPI-anchored protein LLG1 OS=Arabidopsis thaliana GN=LLG1 PE=1 SV=1	50.3	2.2e-37
TRINITY_DN18239_c0_g1	sp|P37121|C76A1_SOLME	CYP76A1	Cytochrome P450 76A1 (Fragment) OS=Solanum melongena GN=CYP76A1 PE=2 SV=1	60.2	4.3e-82
TRINITY_DN18239_c0_g4	sp|O23976|C76B1_HELTU	CYP76B1	7-ethoxycoumarin O-deethylase OS=Helianthus tuberosus GN=CYP76B1 PE=1 SV=1	52.9	1.1e-12
TRINITY_DN18239_c0_g6	sp|P37121|C76A1_SOLME	CYP76A1	Cytochrome P450 76A1 (Fragment) OS=Solanum melongena GN=CYP76A1 PE=2 SV=1	46.9	2.1e-12
TRINITY_DN18241_c0_g1	sp|Q944N1|LHP1_SOLLC	LHP1	Chromo domain protein LHP1 OS=Solanum lycopersicum GN=LHP1 PE=1 SV=2	35.1	4.5e-10
TRINITY_DN18244_c3_g3	sp|Q9SKD0|BPC1_ARATH	BPC1	Protein BASIC PENTACYSTEINE1 OS=Arabidopsis thaliana GN=BPC1 PE=1 SV=1	62.3	1.6e-51
TRINITY_DN18244_c3_g4	sp|O23628|H2AV1_ARATH	H2AV	Histone H2A variant 1 OS=Arabidopsis thaliana GN=H2AV PE=1 SV=1	94.9	3e-46
[truncated: 14,555 more rows]
