# Supplementary material for: Drought Stress Stimulates the Terpenoid Backbone and Triterpenoid Biosynthesis Pathway to Promote the Synthesis of Saikosaponin in Bupleurum chinense DC. Roots
Source: Molecules. 2022 Aug 25;27(17):5470. doi: 10.3390/molecules27175470 (PMC9457724; doi:10.3390/molecules27175470)
Supplement: Supplementary file 1 [file molecules-27-05470-s001.zip › Supplementary Material. Table S6. KEGG_annotation.xlsx]

## Sheet: Sheet1
Query	KEGG_hit	KEGG_identity	KEGG_evalue	GeneName	GeneDescription	KOEntry	KODescription	EC	PathwayEntry	PathwayDefinition	KEGGLevel1	KEGGLevel2
TRINITY_DN10009_c0_g1	vvi:100254522	84.8	1.2e-23	-	60S acidic ribosomal protein P2	K02943	large subunit ribosomal protein LP2	-	vvi03010	Ribosome	Genetic Information Processing	Translation
TRINITY_DN1000_c0_g1	osa:4325717	100	2e-32	-	asparagine--tRNA ligase	K01893	asparaginyl-tRNA synthetase	EC:6.1.1.22	osa00970	Aminoacyl-tRNA biosynthesis	Genetic Information Processing	Translation
TRINITY_DN10012_c0_g1	cpap:110817743	54.8	4.3e-17	-	protein TRANSPORT INHIBITOR RESPONSE 1-like	K14485	transport inhibitor response 1	-	cpap04075	Plant hormone signal transduction	Environmental Information Processing	Signal transduction
TRINITY_DN10037_c0_g1	osa:4335025	100	4e-42	NA	NA	NA	NA	NA	NA	NA	NA	NA
TRINITY_DN10053_c0_g1	apro:F751_5899	73.3	4.1e-06	-	NAD(P) transhydrogenase	K00323	NAD(P) transhydrogenase	EC:1.6.1.2	apro00760	Nicotinate and nicotinamide metabolism	Metabolism	Metabolism of cofactors and vitamins
TRINITY_DN10055_c0_g1	cic:CICLE_v10012788mg	60.8	1.2e-17	-	hypothetical protein	K02889	large subunit ribosomal protein L21e	-	cic03010	Ribosome	Genetic Information Processing	Translation
TRINITY_DN1007_c0_g1	cic:CICLE_v10027727mg	34.5	7e-52	-	hypothetical protein	K00679	phospholipid:diacylglycerol acyltransferase	EC:2.3.1.158	cic00561	Glycerolipid metabolism	Metabolism	Lipid metabolism
TRINITY_DN10134_c0_g1	brp:103830766	71	6.5e-18	-	anaphase-promoting complex subunit 13	K12456	anaphase-promoting complex subunit 13	-	brp04120	Ubiquitin mediated proteolysis	Genetic Information Processing	Folding, sorting and degradation
TRINITY_DN10140_c0_g1	gmx:100816150	100	7.6e-32	-	delta-1-pyrroline-5-carboxylate synthase-like	K12657	delta-1-pyrroline-5-carboxylate synthetase	EC:2.7.2.11 1.2.1.41	gmx00330	Arginine and proline metabolism	Metabolism	Amino acid metabolism
TRINITY_DN10158_c0_g1	osa:4324899	98.8	4.7e-41	-	probable phosphoribosylformylglycinamidine synthase	K01952	phosphoribosylformylglycinamidine synthase	EC:6.3.5.3	osa00230	Purine metabolism	Metabolism	Nucleotide metabolism
TRINITY_DN1015_c0_g1	lang:109330985	57.4	5e-12	-	ATP synthase subunit alpha	K02132	F-type H+-transporting ATPase subunit alpha	-	lang00190	Oxidative phosphorylation	Metabolism	Energy metabolism
TRINITY_DN10165_c0_g1	gmx:100305783	100	3.3e-24	-	probable small nuclear ribonucleoprotein F	K11098	small nuclear ribonucleoprotein F	-	gmx03040	Spliceosome	Genetic Information Processing	Transcription
TRINITY_DN10165_c0_g2	atr:18437879	88.1	5.1e-29	-	probable small nuclear ribonucleoprotein F	K11098	small nuclear ribonucleoprotein F	-	atr03040	Spliceosome	Genetic Information Processing	Transcription
TRINITY_DN10169_c0_g1	gmx:100819051	100	2.7e-32	-	proteasome subunit alpha type-1-B-like	K02725	20S proteasome subunit alpha 6	EC:3.4.25.1	gmx03050	Proteasome	Genetic Information Processing	Folding, sorting and degradation
TRINITY_DN10174_c0_g1	cpap:110808661	80.3	3.5e-30	NA	NA	NA	NA	NA	NA	NA	NA	NA
TRINITY_DN10180_c0_g1	gmx:100806167	100	1.1e-30	NA	NA	NA	NA	NA	NA	NA	NA	NA
TRINITY_DN10189_c0_g2	osa:4339794	100	7.7e-35	-	DNA damage-binding protein 1a isoform X1	K10610	DNA damage-binding protein 1	-	osa04120	Ubiquitin mediated proteolysis	Genetic Information Processing	Folding, sorting and degradation
TRINITY_DN10189_c0_g2	osa:4339794	100	7.7e-35	-	DNA damage-binding protein 1a isoform X1	K10610	DNA damage-binding protein 1	-	osa03420	Nucleotide excision repair	Genetic Information Processing	Replication and repair
TRINITY_DN1018_c0_g1	csl:COCSUDRAFT_36935	77.8	9.7e-29	-	hypothetical protein	K03007	DNA-directed RNA polymerases I, II, and III subunit RPABC5	-	csl00230	Purine metabolism	Metabolism	Nucleotide metabolism
TRINITY_DN1018_c0_g1	csl:COCSUDRAFT_36935	77.8	9.7e-29	-	hypothetical protein	K03007	DNA-directed RNA polymerases I, II, and III subunit RPABC5	-	csl00240	Pyrimidine metabolism	Metabolism	Nucleotide metabolism
TRINITY_DN1018_c0_g1	csl:COCSUDRAFT_36935	77.8	9.7e-29	-	hypothetical protein	K03007	DNA-directed RNA polymerases I, II, and III subunit RPABC5	-	csl03020	RNA polymerase	Genetic Information Processing	Transcription
TRINITY_DN10212_c0_g1	mus:103977527	52.7	5.4e-10	NA	NA	NA	NA	NA	NA	NA	NA	NA
TRINITY_DN10212_c0_g2	egu:105060863	46.2	1.7e-07	NA	NA	NA	NA	NA	NA	NA	NA	NA
TRINITY_DN10236_c0_g1	gmx:100811217	100	2.3e-37	-	bifunctional 3-dehydroquinate dehydratase/shikimate dehydrogenase	K13832	3-dehydroquinate dehydratase / shikimate dehydrogenase	EC:4.2.1.10 1.1.1.25	gmx00400	Phenylalanine, tyrosine and tryptophan biosynthesis	Metabolism	Amino acid metabolism
TRINITY_DN10261_c0_g1	gmx:100500024	100	2e-37	-	cytochrome b-c1 complex subunit 6	K00416	ubiquinol-cytochrome c reductase subunit 6	-	gmx00190	Oxidative phosphorylation	Metabolism	Energy metabolism
TRINITY_DN10275_c0_g1	osa:4328149	100	1.9e-30	NA	NA	NA	NA	NA	NA	NA	NA	NA
TRINITY_DN10281_c0_g1	osa:4326638	100	7.9e-35	-	calcium-dependent protein kinase 3	K13412	calcium-dependent protein kinase	EC:2.7.11.1	osa04626	Plant-pathogen interaction	Organismal Systems	Environmental adaptation
TRINITY_DN10300_c0_g1	tcc:18598308	56.1	1.2e-11	NA	NA	NA	NA	NA	NA	NA	NA	NA
TRINITY_DN10307_c0_g1	mdm:103451319	52.3	1.1e-12	NA	NA	NA	NA	NA	NA	NA	NA	NA
TRINITY_DN10359_c0_g1	nnu:104610843	82.4	4.2e-29	-	26S protease regulatory subunit 6A homolog	K03065	26S proteasome regulatory subunit T5	-	nnu03050	Proteasome	Genetic Information Processing	Folding, sorting and degradation
TRINITY_DN103_c0_g1	ccp:ChcroMp13	56.1	6.4e-12	nad3	NADH dehydrogenase subunit 3	K03880	NADH-ubiquinone oxidoreductase chain 3	EC:1.6.5.3	ccp00190	Oxidative phosphorylation	Metabolism	Energy metabolism
TRINITY_DN10415_c0_g1	gmx:100783237	100	3e-35	-	nuclear poly(A) polymerase 4-like	K14376	poly(A) polymerase	EC:2.7.7.19	gmx03015	mRNA surveillance pathway	Genetic Information Processing	Translation
TRINITY_DN1042_c0_g1	pxb:103939751	76	1.7e-26	-	serine/threonine-protein phosphatase PP1 isoform X1	K06269	serine/threonine-protein phosphatase PP1 catalytic subunit	EC:3.1.3.16	pxb03015	mRNA surveillance pathway	Genetic Information Processing	Translation
TRINITY_DN1045_c0_g1	ini:109170521	44.7	5.3e-11	-	histone-lysine N-methyltransferase ASHH2-like	K11423	histone-lysine N-methyltransferase SETD2	EC:2.1.1.43	ini00310	Lysine degradation	Metabolism	Amino acid metabolism
TRINITY_DN10494_c0_g1	jcu:105640009	68.8	2.5e-10	NA	NA	NA	NA	NA	NA	NA	NA	NA
TRINITY_DN10538_c0_g1	gsl:Gasu_19660	62.2	8.1e-17	-	60S ribosomal protein L7Ae isoform 1	K02936	large subunit ribosomal protein L7Ae	-	gsl03010	Ribosome	Genetic Information Processing	Translation
TRINITY_DN1055_c0_g1	han:110885811	83.3	6.7e-31	-	protein O-glucosyltransferase 1-like	K13667	protein glucosyltransferase	EC:2.4.1.-	han00514	Other types of O-glycan biosynthesis	Metabolism	Glycan biosynthesis and metabolism
TRINITY_DN10575_c0_g1	dct:110097844	76.9	1.4e-24	NA	NA	NA	NA	NA	NA	NA	NA	NA
TRINITY_DN10576_c0_g2	bna:111211610	74.1	7.8e-19	-	40S ribosomal protein S29-like	K02980	small subunit ribosomal protein S29e	-	bna03010	Ribosome	Genetic Information Processing	Translation
TRINITY_DN10601_c0_g1	gmx:100781796	100	3.5e-45	NA	NA	NA	NA	NA	NA	NA	NA	NA
TRINITY_DN10622_c0_g1	osa:4334126	100	5.3e-30	NA	NA	NA	NA	NA	NA	NA	NA	NA
TRINITY_DN10622_c0_g2	osa:4334126	100	2.8e-37	NA	NA	NA	NA	NA	NA	NA	NA	NA
TRINITY_DN1065_c0_g1	ccaj:109799157	90.7	2.8e-35	NA	NA	NA	NA	NA	NA	NA	NA	NA
TRINITY_DN1067_c0_g1	apro:F751_5899	50.9	2.8e-08	-	NAD(P) transhydrogenase	K00323	NAD(P) transhydrogenase	EC:1.6.1.2	apro00760	Nicotinate and nicotinamide metabolism	Metabolism	Metabolism of cofactors and vitamins
TRINITY_DN10680_c0_g1	gmx:100801697	100	1.2e-20	NA	NA	NA	NA	NA	NA	NA	NA	NA
TRINITY_DN1068_c0_g1	osa:4345227	100	6.7e-36	-	protein SMG7 isoform X1	K14409	protein SMG7	-	osa03015	mRNA surveillance pathway	Genetic Information Processing	Translation
TRINITY_DN10717_c0_g3	apro:F751_6354	80.2	1.8e-42	-	Aconitate hydratase	K01681	aconitate hydratase	EC:4.2.1.3	apro00020	Citrate cycle (TCA cycle)	Metabolism	Carbohydrate metabolism
TRINITY_DN10717_c0_g3	apro:F751_6354	80.2	1.8e-42	-	Aconitate hydratase	K01681	aconitate hydratase	EC:4.2.1.3	apro00630	Glyoxylate and dicarboxylate metabolism	Metabolism	Carbohydrate metabolism
TRINITY_DN1072_c0_g1	osa:4329532	98.9	2.3e-44	-	1	K00700	1,4-alpha-glucan branching enzyme	EC:2.4.1.18	osa00500	Starch and sucrose metabolism	Metabolism	Carbohydrate metabolism
TRINITY_DN10764_c0_g1	cme:CYME_CML049C	69.9	1.4e-27	-	glutamate dehydrogenase	K00261	glutamate dehydrogenase (NAD(P)+)	EC:1.4.1.3	cme00910	Nitrogen metabolism	Metabolism	Energy metabolism
TRINITY_DN10764_c0_g1	cme:CYME_CML049C	69.9	1.4e-27	-	glutamate dehydrogenase	K00261	glutamate dehydrogenase (NAD(P)+)	EC:1.4.1.3	cme00250	Alanine, aspartate and glutamate metabolism	Metabolism	Amino acid metabolism
TRINITY_DN10764_c0_g1	cme:CYME_CML049C	69.9	1.4e-27	-	glutamate dehydrogenase	K00261	glutamate dehydrogenase (NAD(P)+)	EC:1.4.1.3	cme00220	Arginine biosynthesis	Metabolism	Amino acid metabolism
TRINITY_DN10764_c0_g1	cme:CYME_CML049C	69.9	1.4e-27	-	glutamate dehydrogenase	K00261	glutamate dehydrogenase (NAD(P)+)	EC:1.4.1.3	cme00471	D-Glutamine and D-glutamate metabolism	Metabolism	Metabolism of other amino acids
TRINITY_DN10772_c0_g1	jcu:105640204	55.2	1.4e-62	NA	NA	NA	NA	NA	NA	NA	NA	NA
TRINITY_DN10778_c0_g1	ccaj:109801113	95.5	1.9e-27	NA	NA	NA	NA	NA	NA	NA	NA	NA
TRINITY_DN10779_c0_g1	ini:109181516	40	7.3e-06	NA	NA	NA	NA	NA	NA	NA	NA	NA
TRINITY_DN10811_c0_g1	ini:109176543	70	2e-80	NA	NA	NA	NA	NA	NA	NA	NA	NA
TRINITY_DN10815_c0_g1	pvu:PHAVU_008G176600g	48.1	7.7e-18	-	hypothetical protein	K02267	cytochrome c oxidase subunit 6b	-	pvu00190	Oxidative phosphorylation	Metabolism	Energy metabolism
TRINITY_DN10830_c0_g1	fve:101312511	73.2	4e-18	-	protein disulfide-isomerase 5-1	K13984	thioredoxin domain-containing protein 5	-	fve04141	Protein processing in endoplasmic reticulum	Genetic Information Processing	Folding, sorting and degradation
TRINITY_DN10832_c0_g1	fve:101306933	58.7	1.5e-06	-	probable UDP-arabinopyranose mutase 5	K13379	reversibly glycosylated polypeptide / UDP-arabinopyranose mutase	EC:2.4.1.- 5.4.99.30	fve00520	Amino sugar and nucleotide sugar metabolism	Metabolism	Carbohydrate metabolism
TRINITY_DN10839_c0_g1	olu:OSTLU_32150	62.3	5.5e-23	NA	NA	NA	NA	NA	NA	NA	NA	NA
TRINITY_DN10849_c0_g1	obr:102702003	98.5	1.8e-33	-	primary amine oxidase-like	K00276	primary-amine oxidase	EC:1.4.3.21	obr00260	Glycine, serine and threonine metabolism	Metabolism	Amino acid metabolism
TRINITY_DN10849_c0_g1	obr:102702003	98.5	1.8e-33	-	primary amine oxidase-like	K00276	primary-amine oxidase	EC:1.4.3.21	obr00350	Tyrosine metabolism	Metabolism	Amino acid metabolism
TRINITY_DN10849_c0_g1	obr:102702003	98.5	1.8e-33	-	primary amine oxidase-like	K00276	primary-amine oxidase	EC:1.4.3.21	obr00360	Phenylalanine metabolism	Metabolism	Amino acid metabolism
TRINITY_DN10849_c0_g1	obr:102702003	98.5	1.8e-33	-	primary amine oxidase-like	K00276	primary-amine oxidase	EC:1.4.3.21	obr00410	beta-Alanine metabolism	Metabolism	Metabolism of other amino acids
TRINITY_DN10849_c0_g1	obr:102702003	98.5	1.8e-33	-	primary amine oxidase-like	K00276	primary-amine oxidase	EC:1.4.3.21	obr00950	Isoquinoline alkaloid biosynthesis	Metabolism	Biosynthesis of other secondary metabolites
TRINITY_DN10849_c0_g1	obr:102702003	98.5	1.8e-33	-	primary amine oxidase-like	K00276	primary-amine oxidase	EC:1.4.3.21	obr00960	Tropane, piperidine and pyridine alkaloid biosynthesis	Metabolism	Biosynthesis of other secondary metabolites
TRINITY_DN1085_c0_g1	osa:4350987	100	6.4e-23	-	1-acyl-sn-glycerol-3-phosphate acyltransferase PLS1	K13523	lysophosphatidic acid acyltransferase / lysophosphatidylinositol acyltransferase	EC:2.3.1.51 2.3.1.-	osa00561	Glycerolipid metabolism	Metabolism	Lipid metabolism
TRINITY_DN1085_c0_g1	osa:4350987	100	6.4e-23	-	1-acyl-sn-glycerol-3-phosphate acyltransferase PLS1	K13523	lysophosphatidic acid acyltransferase / lysophosphatidylinositol acyltransferase	EC:2.3.1.51 2.3.1.-	osa00564	Glycerophospholipid metabolism	Metabolism	Lipid metabolism
TRINITY_DN10871_c0_g1	han:110907754	54.4	8.5e-19	NA	NA	NA	NA	NA	NA	NA	NA	NA
TRINITY_DN10888_c0_g1	nsy:104228962	78.8	9.6e-88	NA	NA	NA	NA	NA	NA	NA	NA	NA
TRINITY_DN10889_c0_g2	osa:9272617	100	2.3e-18	NA	NA	NA	NA	NA	NA	NA	NA	NA
TRINITY_DN1088_c0_g1	nta:107779871	77.3	1.3e-23	-	small nuclear ribonucleoprotein E-like	K11097	small nuclear ribonucleoprotein E	-	nta03040	Spliceosome	Genetic Information Processing	Transcription
TRINITY_DN10890_c0_g1	pvu:PHAVU_001G025000g	98.5	2.8e-31	NA	NA	NA	NA	NA	NA	NA	NA	NA
TRINITY_DN10892_c0_g1	gmx:100788515	100	1.4e-36	-	heterogeneous nuclear ribonucleoprotein 1	K14411	RNA-binding protein Musashi	-	gmx03015	mRNA surveillance pathway	Genetic Information Processing	Translation
TRINITY_DN10897_c0_g3	gmx:100798930	100	2.2e-25	-	probable 1-deoxy-D-xylulose-5-phosphate synthase 2	K01662	1-deoxy-D-xylulose-5-phosphate synthase	EC:2.2.1.7	gmx00730	Thiamine metabolism	Metabolism	Metabolism of cofactors and vitamins
TRINITY_DN10897_c0_g3	gmx:100798930	100	2.2e-25	-	probable 1-deoxy-D-xylulose-5-phosphate synthase 2	K01662	1-deoxy-D-xylulose-5-phosphate synthase	EC:2.2.1.7	gmx00900	Terpenoid backbone biosynthesis	Metabolism	Metabolism of terpenoids and polyketides
TRINITY_DN10904_c0_g1	brp:103841444	65.2	2.4e-22	-	ubiquitin-conjugating enzyme E2 14	K10575	ubiquitin-conjugating enzyme E2 G1	EC:2.3.2.23	brp04141	Protein processing in endoplasmic reticulum	Genetic Information Processing	Folding, sorting and degradation
TRINITY_DN10904_c0_g1	brp:103841444	65.2	2.4e-22	-	ubiquitin-conjugating enzyme E2 14	K10575	ubiquitin-conjugating enzyme E2 G1	EC:2.3.2.23	brp04120	Ubiquitin mediated proteolysis	Genetic Information Processing	Folding, sorting and degradation
TRINITY_DN10910_c0_g1	bvg:104883991	49.3	2.5e-12	NA	NA	NA	NA	NA	NA	NA	NA	NA
TRINITY_DN10928_c0_g1	tcc:18603524	67.9	1.2e-33	-	60S ribosomal protein L22-3	K02891	large subunit ribosomal protein L22e	-	tcc03010	Ribosome	Genetic Information Processing	Translation
TRINITY_DN11032_c0_g1	mcha:111011453	50	7.4e-08	-	splicing factor 3B subunit 1	K12828	splicing factor 3B subunit 1	-	mcha03040	Spliceosome	Genetic Information Processing	Transcription
TRINITY_DN1103_c0_g1	gmx:732610	100	5.4e-33	TSA	tryptophan synthase alpha chain	K01695	tryptophan synthase alpha chain	EC:4.2.1.20	gmx00260	Glycine, serine and threonine metabolism	Metabolism	Amino acid metabolism
TRINITY_DN1103_c0_g1	gmx:732610	100	5.4e-33	TSA	tryptophan synthase alpha chain	K01695	tryptophan synthase alpha chain	EC:4.2.1.20	gmx00400	Phenylalanine, tyrosine and tryptophan biosynthesis	Metabolism	Amino acid metabolism
TRINITY_DN11045_c0_g1	var:108319969	68.2	6.1e-25	NA	NA	NA	NA	NA	NA	NA	NA	NA
TRINITY_DN11059_c0_g1	vra:106754356	75.9	8.5e-07	-	calcium-dependent protein kinase 2	K13412	calcium-dependent protein kinase	EC:2.7.11.1	vra04626	Plant-pathogen interaction	Organismal Systems	Environmental adaptation
TRINITY_DN11065_c0_g1	osa:4350687	98.7	1.3e-38	-	probable nucleolar protein 5-1	K14565	nucleolar protein 58	-	osa03008	Ribosome biogenesis in eukaryotes	Genetic Information Processing	Translation
TRINITY_DN11079_c0_g1	nta:107793699	95.6	4.6e-44	-	sm-like protein LSM36B	K12625	U6 snRNA-associated Sm-like protein LSm6	-	nta03040	Spliceosome	Genetic Information Processing	Transcription
TRINITY_DN11079_c0_g1	nta:107793699	95.6	4.6e-44	-	sm-like protein LSM36B	K12625	U6 snRNA-associated Sm-like protein LSm6	-	nta03018	RNA degradation	Genetic Information Processing	Folding, sorting and degradation
TRINITY_DN11100_c1_g1	ath:AT5G06360	100	1.1e-09	NA	NA	NA	NA	NA	NA	NA	NA	NA
TRINITY_DN11144_c0_g1	gmx:100810640	100	3.2e-11	-	splicing factor 3B subunit 2-like	K12829	splicing factor 3B subunit 2	-	gmx03040	Spliceosome	Genetic Information Processing	Transcription
TRINITY_DN11148_c0_g1	zma:100191798	97.1	1.6e-37	pco124238	putative pre-mRNA-splicing factor ATP-dependent RNA helicase DEAH3	K12820	pre-mRNA-splicing factor ATP-dependent RNA helicase DHX15/PRP43	EC:3.6.4.13	zma03040	Spliceosome	Genetic Information Processing	Transcription
TRINITY_DN11176_c0_g1	osa:4330426	100	4.4e-33	NA	NA	NA	NA	NA	NA	NA	NA	NA
TRINITY_DN11176_c0_g2	osa:4330426	100	1.1e-30	NA	NA	NA	NA	NA	NA	NA	NA	NA
TRINITY_DN11178_c0_g1	osa:4339583	100	4.5e-42	-	branched-chain-amino-acid aminotransferase 5	K00826	branched-chain amino acid aminotransferase	EC:2.6.1.42	osa00270	Cysteine and methionine metabolism	Metabolism	Amino acid metabolism
TRINITY_DN11178_c0_g1	osa:4339583	100	4.5e-42	-	branched-chain-amino-acid aminotransferase 5	K00826	branched-chain amino acid aminotransferase	EC:2.6.1.42	osa00280	Valine, leucine and isoleucine degradation	Metabolism	Amino acid metabolism
TRINITY_DN11178_c0_g1	osa:4339583	100	4.5e-42	-	branched-chain-amino-acid aminotransferase 5	K00826	branched-chain amino acid aminotransferase	EC:2.6.1.42	osa00290	Valine, leucine and isoleucine biosynthesis	Metabolism	Amino acid metabolism
TRINITY_DN11178_c0_g1	osa:4339583	100	4.5e-42	-	branched-chain-amino-acid aminotransferase 5	K00826	branched-chain amino acid aminotransferase	EC:2.6.1.42	osa00770	Pantothenate and CoA biosynthesis	Metabolism	Metabolism of cofactors and vitamins
TRINITY_DN11190_c0_g1	csat:104773476	70	7.9e-28	-	chitinase-3-like protein 2	K01183	chitinase	EC:3.2.1.14	csat00520	Amino sugar and nucleotide sugar metabolism	Metabolism	Carbohydrate metabolism
TRINITY_DN1119_c0_g2	osa:4345872	100	6e-41	-	phospho-2-dehydro-3-deoxyheptonate aldolase 1	K01626	3-deoxy-7-phosphoheptulonate synthase	EC:2.5.1.54	osa00400	Phenylalanine, tyrosine and tryptophan biosynthesis	Metabolism	Amino acid metabolism
TRINITY_DN11215_c0_g1	osa:4346694	100	5.6e-42	-	cyclin-B1-2-like	K11599	proteasome maturation protein	-	osa03050	Proteasome	Genetic Information Processing	Folding, sorting and degradation
TRINITY_DN11269_c0_g1	gmx:100783125	100	6.9e-09	-	V-type proton ATPase subunit a3	K02154	V-type H+-transporting ATPase subunit a	-	gmx00190	Oxidative phosphorylation	Metabolism	Energy metabolism
TRINITY_DN11269_c0_g1	gmx:100783125	100	6.9e-09	-	V-type proton ATPase subunit a3	K02154	V-type H+-transporting ATPase subunit a	-	gmx04145	Phagosome	Cellular Processes	Transport and catabolism
TRINITY_DN1131_c0_g1	lja:Lj4g3v2689670.2	58.3	9.9e-07	NA	NA	NA	NA	NA	NA	NA	NA	NA
TRINITY_DN11338_c0_g3	vra:106772294	45.2	3.5e-11	NA	NA	NA	NA	NA	NA	NA	NA	NA
TRINITY_DN11397_c0_g1	gsl:Gasu_19580	59.3	4.7e-24	NA	NA	NA	NA	NA	NA	NA	NA	NA
TRINITY_DN11407_c0_g1	gmx:100170742	100	3.4e-34	NA	NA	NA	NA	NA	NA	NA	NA	NA
TRINITY_DN11439_c0_g1	hbr:110638021	85.3	1.8e-25	NA	NA	NA	NA	NA	NA	NA	NA	NA
TRINITY_DN11441_c0_g1	osa:4340446	100	2.4e-33	NA	NA	NA	NA	NA	NA	NA	NA	NA
TRINITY_DN1144_c0_g1	osa:4338979	100	1e-37	-	delta-1-pyrroline-5-carboxylate synthase	K12657	delta-1-pyrroline-5-carboxylate synthetase	EC:2.7.2.11 1.2.1.41	osa00330	Arginine and proline metabolism	Metabolism	Amino acid metabolism
TRINITY_DN11459_c0_g1	obr:102710647	57.9	4.2e-29	NA	NA	NA	NA	NA	NA	NA	NA	NA
TRINITY_DN11470_c0_g1	osa:4346016	100	1.4e-36	NA	NA	NA	NA	NA	NA	NA	NA	NA
TRINITY_DN11503_c0_g1	zju:107427838	55.8	8.8e-21	NA	NA	NA	NA	NA	NA	NA	NA	NA
TRINITY_DN11521_c0_g1	osa:4340097	100	4.7e-38	NA	NA	NA	NA	NA	NA	NA	NA	NA
TRINITY_DN11546_c0_g1	aip:107610448	73.8	1.8e-09	-	uncharacterized protein LOC107610448	K00850	6-phosphofructokinase 1	EC:2.7.1.11	aip00010	Glycolysis / Gluconeogenesis	Metabolism	Carbohydrate metabolism
TRINITY_DN11546_c0_g1	aip:107610448	73.8	1.8e-09	-	uncharacterized protein LOC107610448	K00850	6-phosphofructokinase 1	EC:2.7.1.11	aip00030	Pentose phosphate pathway	Metabolism	Carbohydrate metabolism
TRINITY_DN11546_c0_g1	aip:107610448	73.8	1.8e-09	-	uncharacterized protein LOC107610448	K00850	6-phosphofructokinase 1	EC:2.7.1.11	aip00051	Fructose and mannose metabolism	Metabolism	Carbohydrate metabolism
TRINITY_DN11546_c0_g1	aip:107610448	73.8	1.8e-09	-	uncharacterized protein LOC107610448	K00850	6-phosphofructokinase 1	EC:2.7.1.11	aip00052	Galactose metabolism	Metabolism	Carbohydrate metabolism
TRINITY_DN11546_c0_g1	aip:107610448	73.8	1.8e-09	-	uncharacterized protein LOC107610448	K00850	6-phosphofructokinase 1	EC:2.7.1.11	aip03018	RNA degradation	Genetic Information Processing	Folding, sorting and degradation
TRINITY_DN11581_c0_g1	mdm:103415953	80	3e-32	NA	NA	NA	NA	NA	NA	NA	NA	NA
TRINITY_DN11604_c0_g1	osa:4328058	100	2.9e-31	NA	NA	NA	NA	NA	NA	NA	NA	NA
TRINITY_DN11620_c0_g1	osa:4342038	100	9.3e-39	-	pre-mRNA-splicing factor syf2	K12868	pre-mRNA-splicing factor SYF2	-	osa03040	Spliceosome	Genetic Information Processing	Transcription
TRINITY_DN11640_c0_g1	osa:4339247	98.7	2.1e-38	NA	NA	NA	NA	NA	NA	NA	NA	NA
TRINITY_DN11660_c0_g1	cpap:110817269	90.2	7.5e-41	-	protein SUPPRESSOR OF K(+) TRANSPORT GROWTH DEFECT 1	K12196	vacuolar protein-sorting-associated protein 4	-	cpap04144	Endocytosis	Cellular Processes	Transport and catabolism
TRINITY_DN11670_c0_g1	cann:107858708	48.3	1.7e-06	NA	NA	NA	NA	NA	NA	NA	NA	NA
TRINITY_DN11676_c0_g1	osa:4338163	100	6.8e-34	NA	NA	NA	NA	NA	NA	NA	NA	NA
TRINITY_DN11701_c0_g1	nta:107769103	41.5	2e-08	-	60S ribosomal protein L9-1-like	K02940	large subunit ribosomal protein L9e	-	nta03010	Ribosome	Genetic Information Processing	Translation
TRINITY_DN11711_c0_g3	egu:105051728	51.6	2.7e-14	NA	NA	NA	NA	NA	NA	NA	NA	NA
TRINITY_DN11815_c0_g1	cit:102622453	76.9	5.7e-42	-	auxin-responsive protein SAUR50	K14488	SAUR family protein	-	cit04075	Plant hormone signal transduction	Environmental Information Processing	Signal transduction
TRINITY_DN11819_c0_g1	zju:107405997	54.2	4.4e-22	-	zinc finger CCCH domain-containing protein 16-like	K14321	nucleoporin-like protein 2	-	zju03013	RNA transport	Genetic Information Processing	Translation
TRINITY_DN11857_c0_g1	cpap:110815002	90.9	2.4e-30	NA	NA	NA	NA	NA	NA	NA	NA	NA
TRINITY_DN11873_c0_g1	gmx:100499218	100	2.5e-12	RIN4a	RIN4a protein	K13456	RPM1-interacting protein 4	-	gmx04626	Plant-pathogen interaction	Organismal Systems	Environmental adaptation
TRINITY_DN11876_c0_g1	ccp:CHC_T00010168001	79.8	9.6e-58	-	40S ribosomal protein S15a	K02957	small subunit ribosomal protein S15Ae	-	ccp03010	Ribosome	Genetic Information Processing	Translation
TRINITY_DN11894_c0_g3	csl:COCSUDRAFT_24894	49.3	9e-12	-	Nop-domain-containing protein	K14564	nucleolar protein 56	-	csl03008	Ribosome biogenesis in eukaryotes	Genetic Information Processing	Translation
TRINITY_DN11898_c0_g1	gmx:100782110	100	2.7e-45	NA	NA	NA	NA	NA	NA	NA	NA	NA
TRINITY_DN11898_c1_g1	gmx:100784424	100	3.6e-26	NA	NA	NA	NA	NA	NA	NA	NA	NA
TRINITY_DN11926_c0_g1	gmx:100305623	100	1.1e-36	NA	NA	NA	NA	NA	NA	NA	NA	NA
TRINITY_DN11935_c0_g1	vra:106758020	98.9	4.9e-44	-	triosephosphate isomerase	K01803	triosephosphate isomerase (TIM)	EC:5.3.1.1	vra00010	Glycolysis / Gluconeogenesis	Metabolism	Carbohydrate metabolism
TRINITY_DN11935_c0_g1	vra:106758020	98.9	4.9e-44	-	triosephosphate isomerase	K01803	triosephosphate isomerase (TIM)	EC:5.3.1.1	vra00051	Fructose and mannose metabolism	Metabolism	Carbohydrate metabolism
TRINITY_DN11935_c0_g1	vra:106758020	98.9	4.9e-44	-	triosephosphate isomerase	K01803	triosephosphate isomerase (TIM)	EC:5.3.1.1	vra00562	Inositol phosphate metabolism	Metabolism	Carbohydrate metabolism
TRINITY_DN11935_c0_g1	vra:106758020	98.9	4.9e-44	-	triosephosphate isomerase	K01803	triosephosphate isomerase (TIM)	EC:5.3.1.1	vra00710	Carbon fixation in photosynthetic organisms	Metabolism	Energy metabolism
TRINITY_DN11942_c0_g3	gmx:100820554	100	3.5e-38	-	phosphoethanolamine N-methyltransferase	K05929	phosphoethanolamine N-methyltransferase	EC:2.1.1.103	gmx00564	Glycerophospholipid metabolism	Metabolism	Lipid metabolism
TRINITY_DN11992_c0_g1	mdm:103444040	68.3	7.5e-09	NA	NA	NA	NA	NA	NA	NA	NA	NA
TRINITY_DN12011_c0_g1	osa:4328441	100	6.3e-34	-	glycine cleavage system H protein 2	K02437	glycine cleavage system H protein	-	osa00630	Glyoxylate and dicarboxylate metabolism	Metabolism	Carbohydrate metabolism
TRINITY_DN12011_c0_g1	osa:4328441	100	6.3e-34	-	glycine cleavage system H protein 2	K02437	glycine cleavage system H protein	-	osa00260	Glycine, serine and threonine metabolism	Metabolism	Amino acid metabolism
TRINITY_DN12016_c0_g2	osa:9266846	100	2.3e-26	-	ribonucleoside-diphosphate reductase small chain	K10808	ribonucleoside-diphosphate reductase subunit M2	EC:1.17.4.1	osa00230	Purine metabolism	Metabolism	Nucleotide metabolism
TRINITY_DN12016_c0_g2	osa:9266846	100	2.3e-26	-	ribonucleoside-diphosphate reductase small chain	K10808	ribonucleoside-diphosphate reductase subunit M2	EC:1.17.4.1	osa00240	Pyrimidine metabolism	Metabolism	Nucleotide metabolism
TRINITY_DN12016_c0_g2	osa:9266846	100	2.3e-26	-	ribonucleoside-diphosphate reductase small chain	K10808	ribonucleoside-diphosphate reductase subunit M2	EC:1.17.4.1	osa00480	Glutathione metabolism	Metabolism	Metabolism of other amino acids
TRINITY_DN12016_c0_g3	cvr:CHLNCDRAFT_34102	80.9	9e-25	-	hypothetical protein	K10808	ribonucleoside-diphosphate reductase subunit M2	EC:1.17.4.1	cvr00230	Purine metabolism	Metabolism	Nucleotide metabolism
TRINITY_DN12016_c0_g3	cvr:CHLNCDRAFT_34102	80.9	9e-25	-	hypothetical protein	K10808	ribonucleoside-diphosphate reductase subunit M2	EC:1.17.4.1	cvr00240	Pyrimidine metabolism	Metabolism	Nucleotide metabolism
TRINITY_DN12016_c0_g3	cvr:CHLNCDRAFT_34102	80.9	9e-25	-	hypothetical protein	K10808	ribonucleoside-diphosphate reductase subunit M2	EC:1.17.4.1	cvr00480	Glutathione metabolism	Metabolism	Metabolism of other amino acids
TRINITY_DN12036_c0_g1	dosa:Os12t0212100-00	64.6	2.3e-13	Os12g0212100	Similar to A/G-specific adenine DNA glycosylase.	K03575	A/G-specific adenine glycosylase	EC:3.2.2.31	dosa03410	Base excision repair	Genetic Information Processing	Replication and repair
TRINITY_DN12036_c0_g2	dosa:Os12t0212100-00	70.2	3.9e-10	Os12g0212100	Similar to A/G-specific adenine DNA glycosylase.	K03575	A/G-specific adenine glycosylase	EC:3.2.2.31	dosa03410	Base excision repair	Genetic Information Processing	Replication and repair
TRINITY_DN12082_c0_g2	gmx:100799779	100	3.5e-35	-	26S proteasome non-ATPase regulatory subunit 2 homolog A	K03028	26S proteasome regulatory subunit N1	-	gmx03050	Proteasome	Genetic Information Processing	Folding, sorting and degradation
TRINITY_DN1209_c0_g1	gmx:100818789	100	9.6e-39	-	6-phosphogluconate dehydrogenase	K00033	6-phosphogluconate dehydrogenase	EC:1.1.1.44 1.1.1.343	gmx00030	Pentose phosphate pathway	Metabolism	Carbohydrate metabolism
TRINITY_DN1209_c0_g1	gmx:100818789	100	9.6e-39	-	6-phosphogluconate dehydrogenase	K00033	6-phosphogluconate dehydrogenase	EC:1.1.1.44 1.1.1.343	gmx00480	Glutathione metabolism	Metabolism	Metabolism of other amino acids
TRINITY_DN12145_c0_g1	nnu:104599099	66	3.2e-73	NA	NA	NA	NA	NA	NA	NA	NA	NA
TRINITY_DN12153_c0_g1	gmx:100818043	100	4e-36	-	ATPase 11	K01535	H+-transporting ATPase	EC:3.6.3.6	gmx00190	Oxidative phosphorylation	Metabolism	Energy metabolism
TRINITY_DN12175_c0_g1	gmx:100807734	100	4.2e-38	NA	NA	NA	NA	NA	NA	NA	NA	NA
TRINITY_DN12192_c0_g1	ini:109182031	61.8	2.3e-18	-	eukaryotic translation initiation factor 3 subunit A-like	K03254	translation initiation factor 3 subunit A	-	ini03013	RNA transport	Genetic Information Processing	Translation
TRINITY_DN12203_c0_g1	gmx:100778692	100	3.8e-39	NA	NA	NA	NA	NA	NA	NA	NA	NA
TRINITY_DN12247_c0_g1	gmx:100813555	95.7	2.7e-48	NA	NA	NA	NA	NA	NA	NA	NA	NA
TRINITY_DN1224_c0_g2	gmx:100527221	100	9.2e-63	GSTU43	uncharacterized LOC100527221	K00799	glutathione S-transferase	EC:2.5.1.18	gmx00480	Glutathione metabolism	Metabolism	Metabolism of other amino acids
TRINITY_DN1228_c0_g1	osa:4334651	100	2.1e-15	-	50S ribosomal protein L18	K02881	large subunit ribosomal protein L18	-	osa03010	Ribosome	Genetic Information Processing	Translation
TRINITY_DN12309_c0_g2	osa:4334171	100	9.5e-38	-	alpha-1	K00688	glycogen phosphorylase	EC:2.4.1.1	osa00500	Starch and sucrose metabolism	Metabolism	Carbohydrate metabolism
TRINITY_DN12309_c0_g3	osa:4334171	100	6.1e-25	-	alpha-1	K00688	glycogen phosphorylase	EC:2.4.1.1	osa00500	Starch and sucrose metabolism	Metabolism	Carbohydrate metabolism
TRINITY_DN12327_c0_g1	hbr:110643652	47.6	2.4e-09	NA	NA	NA	NA	NA	NA	NA	NA	NA
TRINITY_DN12337_c0_g1	egu:105055153	86.8	1.6e-29	NA	NA	NA	NA	NA	NA	NA	NA	NA
TRINITY_DN12337_c0_g3	dosa:Os07t0203925-00	93.7	1e-31	NA	NA	NA	NA	NA	NA	NA	NA	NA
TRINITY_DN12350_c0_g2	gmx:100777369	40.8	1.9e-12	-	pentatricopeptide repeat-containing protein At4g25270	K13800	UMP-CMP kinase	EC:2.7.4.14	gmx00240	Pyrimidine metabolism	Metabolism	Nucleotide metabolism
TRINITY_DN12370_c0_g2	pavi:110761952	82.1	4.6e-33	NA	NA	NA	NA	NA	NA	NA	NA	NA
TRINITY_DN12388_c0_g2	vra:106770714	68.3	2.3e-15	-	VQ motif-containing protein 8	K20725	MAP kinase substrate 1	-	vra04016	MAPK signaling pathway - plant	Environmental Information Processing	Signal transduction
TRINITY_DN12413_c0_g1	osa:4352232	100	7.6e-36	NA	NA	NA	NA	NA	NA	NA	NA	NA
TRINITY_DN12417_c0_g1	osa:4328210	100	2.8e-32	NA	NA	NA	NA	NA	NA	NA	NA	NA
TRINITY_DN12422_c0_g1	osa:4339815	100	1.5e-35	-	nucleoside diphosphate kinase 3	K00940	nucleoside-diphosphate kinase	EC:2.7.4.6	osa00230	Purine metabolism	Metabolism	Nucleotide metabolism
TRINITY_DN12422_c0_g1	osa:4339815	100	1.5e-35	-	nucleoside diphosphate kinase 3	K00940	nucleoside-diphosphate kinase	EC:2.7.4.6	osa00240	Pyrimidine metabolism	Metabolism	Nucleotide metabolism
TRINITY_DN12422_c0_g1	osa:4339815	100	1.5e-35	-	nucleoside diphosphate kinase 3	K00940	nucleoside-diphosphate kinase	EC:2.7.4.6	osa04016	MAPK signaling pathway - plant	Environmental Information Processing	Signal transduction
TRINITY_DN12423_c0_g1	bpg:Bathy17g01960	81.4	8.8e-28	-	Eukaryotic translation initiation factor 1A	K03236	translation initiation factor 1A	-	bpg03013	RNA transport	Genetic Information Processing	Translation
TRINITY_DN12428_c0_g2	vvi:100241461	83.9	8.8e-195	-	magnesium-protoporphyrin IX monomethyl ester [oxidative] cyclase	K04035	magnesium-protoporphyrin IX monomethyl ester (oxidative) cyclase	EC:1.14.13.81	vvi00860	Porphyrin and chlorophyll metabolism	Metabolism	Metabolism of cofactors and vitamins
TRINITY_DN12486_c0_g1	pda:103718698	46	4.3e-09	NA	NA	NA	NA	NA	NA	NA	NA	NA
TRINITY_DN12497_c0_g1	gmx:100791600	94	7.4e-18	NA	NA	NA	NA	NA	NA	NA	NA	NA
TRINITY_DN12501_c0_g1	osa:4343046	100	3.5e-38	NA	NA	NA	NA	NA	NA	NA	NA	NA
TRINITY_DN12512_c0_g1	ghi:107951777	56.9	2.3e-08	-	indole-3-acetic acid-amido synthetase GH3.6-like	K14487	auxin responsive GH3 gene family	-	ghi04075	Plant hormone signal transduction	Environmental Information Processing	Signal transduction
TRINITY_DN12550_c0_g1	lja:Lj3g3v2995710.1	43.2	5.4e-08	Lj3g3v2995710.1	-	K12196	vacuolar protein-sorting-associated protein 4	-	lja04144	Endocytosis	Cellular Processes	Transport and catabolism
TRINITY_DN12564_c0_g1	gmx:100792812	100	2.7e-38	-	tryptophan synthase beta chain 1	K01696	tryptophan synthase beta chain	EC:4.2.1.20	gmx00260	Glycine, serine and threonine metabolism	Metabolism	Amino acid metabolism
TRINITY_DN12564_c0_g1	gmx:100792812	100	2.7e-38	-	tryptophan synthase beta chain 1	K01696	tryptophan synthase beta chain	EC:4.2.1.20	gmx00400	Phenylalanine, tyrosine and tryptophan biosynthesis	Metabolism	Amino acid metabolism
TRINITY_DN12586_c0_g1	adu:107473221	46.8	9e-15	NA	NA	NA	NA	NA	NA	NA	NA	NA
TRINITY_DN12592_c1_g2	nta:107828690	38.6	9.8e-11	NA	NA	NA	NA	NA	NA	NA	NA	NA
TRINITY_DN12633_c0_g1	pda:103724091	58.5	3.3e-06	NA	NA	NA	NA	NA	NA	NA	NA	NA
TRINITY_DN12636_c0_g2	ccp:CHC_T00008875001	75	5.5e-31	NA	NA	NA	NA	NA	NA	NA	NA	NA
TRINITY_DN12643_c0_g1	cvr:CHLNCDRAFT_133450	86.7	8.5e-16	NA	NA	NA	NA	NA	NA	NA	NA	NA
TRINITY_DN12653_c0_g1	cvr:CHLNCDRAFT_133134	48.7	3.3e-13	-	hypothetical protein	K02900	large subunit ribosomal protein L27Ae	-	cvr03010	Ribosome	Genetic Information Processing	Translation
TRINITY_DN12653_c0_g2	dct:110112387	70.1	7.6e-17	-	60S ribosomal protein L27a-3-like	K02900	large subunit ribosomal protein L27Ae	-	dct03010	Ribosome	Genetic Information Processing	Translation
TRINITY_DN12669_c0_g1	gmx:100791259	100	7.8e-06	NA	NA	NA	NA	NA	NA	NA	NA	NA
TRINITY_DN12671_c0_g1	osa:4352058	100	3.9e-33	-	serine hydroxymethyltransferase 4	K00600	glycine hydroxymethyltransferase	EC:2.1.2.1	osa00630	Glyoxylate and dicarboxylate metabolism	Metabolism	Carbohydrate metabolism
TRINITY_DN12671_c0_g1	osa:4352058	100	3.9e-33	-	serine hydroxymethyltransferase 4	K00600	glycine hydroxymethyltransferase	EC:2.1.2.1	osa00260	Glycine, serine and threonine metabolism	Metabolism	Amino acid metabolism
TRINITY_DN12671_c0_g1	osa:4352058	100	3.9e-33	-	serine hydroxymethyltransferase 4	K00600	glycine hydroxymethyltransferase	EC:2.1.2.1	osa00460	Cyanoamino acid metabolism	Metabolism	Metabolism of other amino acids
TRINITY_DN12671_c0_g1	osa:4352058	100	3.9e-33	-	serine hydroxymethyltransferase 4	K00600	glycine hydroxymethyltransferase	EC:2.1.2.1	osa00670	One carbon pool by folate	Metabolism	Metabolism of cofactors and vitamins
TRINITY_DN12711_c0_g1	hbr:110664525	41.3	2.2e-47	NA	NA	NA	NA	NA	NA	NA	NA	NA
TRINITY_DN12714_c0_g1	osa:4332068	100	1.4e-46	-	probable glucan 1	K05546	mannosyl-oligosaccharide alpha-1,3-glucosidase	EC:3.2.1.207	osa00510	N-Glycan biosynthesis	Metabolism	Glycan biosynthesis and metabolism
TRINITY_DN12714_c0_g1	osa:4332068	100	1.4e-46	-	probable glucan 1	K05546	mannosyl-oligosaccharide alpha-1,3-glucosidase	EC:3.2.1.207	osa04141	Protein processing in endoplasmic reticulum	Genetic Information Processing	Folding, sorting and degradation
TRINITY_DN12720_c0_g1	gmx:100785459	100	4e-25	-	lipid phosphate phosphatase 2-like	K18693	diacylglycerol diphosphate phosphatase / phosphatidate phosphatase	EC:3.1.3.81 3.1.3.4	gmx00561	Glycerolipid metabolism	Metabolism	Lipid metabolism
TRINITY_DN12720_c0_g1	gmx:100785459	100	4e-25	-	lipid phosphate phosphatase 2-like	K18693	diacylglycerol diphosphate phosphatase / phosphatidate phosphatase	EC:3.1.3.81 3.1.3.4	gmx00564	Glycerophospholipid metabolism	Metabolism	Lipid metabolism
TRINITY_DN12738_c0_g1	nta:107765414	37.8	6.4e-52	NA	NA	NA	NA	NA	NA	NA	NA	NA
TRINITY_DN12819_c0_g1	osa:4325282	100	1.6e-46	-	60S ribosomal protein L37a isoform X2	K02921	large subunit ribosomal protein L37Ae	-	osa03010	Ribosome	Genetic Information Processing	Translation
TRINITY_DN12835_c0_g1	zma:100284226	78.8	6.5e-06	-	inner membrane protein ALBINO3	K03217	YidC/Oxa1 family membrane protein insertase	-	zma03060	Protein export	Genetic Information Processing	Folding, sorting and degradation
TRINITY_DN1289_c0_g1	osa:4341637	100	2.4e-24	-	proteasome subunit beta type-3	K02735	20S proteasome subunit beta 3	EC:3.4.25.1	osa03050	Proteasome	Genetic Information Processing	Folding, sorting and degradation
TRINITY_DN1290_c0_g1	aip:107610448	73.8	3.5e-09	-	uncharacterized protein LOC107610448	K00850	6-phosphofructokinase 1	EC:2.7.1.11	aip00010	Glycolysis / Gluconeogenesis	Metabolism	Carbohydrate metabolism
TRINITY_DN1290_c0_g1	aip:107610448	73.8	3.5e-09	-	uncharacterized protein LOC107610448	K00850	6-phosphofructokinase 1	EC:2.7.1.11	aip00030	Pentose phosphate pathway	Metabolism	Carbohydrate metabolism
TRINITY_DN1290_c0_g1	aip:107610448	73.8	3.5e-09	-	uncharacterized protein LOC107610448	K00850	6-phosphofructokinase 1	EC:2.7.1.11	aip00051	Fructose and mannose metabolism	Metabolism	Carbohydrate metabolism
TRINITY_DN1290_c0_g1	aip:107610448	73.8	3.5e-09	-	uncharacterized protein LOC107610448	K00850	6-phosphofructokinase 1	EC:2.7.1.11	aip00052	Galactose metabolism	Metabolism	Carbohydrate metabolism
TRINITY_DN1290_c0_g1	aip:107610448	73.8	3.5e-09	-	uncharacterized protein LOC107610448	K00850	6-phosphofructokinase 1	EC:2.7.1.11	aip03018	RNA degradation	Genetic Information Processing	Folding, sorting and degradation
TRINITY_DN12940_c0_g1	gmx:100527532	100	1.5e-32	-	fructose-bisphosphate aldolase	K01623	fructose-bisphosphate aldolase, class I	EC:4.1.2.13	gmx00010	Glycolysis / Gluconeogenesis	Metabolism	Carbohydrate metabolism
TRINITY_DN12940_c0_g1	gmx:100527532	100	1.5e-32	-	fructose-bisphosphate aldolase	K01623	fructose-bisphosphate aldolase, class I	EC:4.1.2.13	gmx00030	Pentose phosphate pathway	Metabolism	Carbohydrate metabolism
TRINITY_DN12940_c0_g1	gmx:100527532	100	1.5e-32	-	fructose-bisphosphate aldolase	K01623	fructose-bisphosphate aldolase, class I	EC:4.1.2.13	gmx00051	Fructose and mannose metabolism	Metabolism	Carbohydrate metabolism
TRINITY_DN12940_c0_g1	gmx:100527532	100	1.5e-32	-	fructose-bisphosphate aldolase	K01623	fructose-bisphosphate aldolase, class I	EC:4.1.2.13	gmx00710	Carbon fixation in photosynthetic organisms	Metabolism	Energy metabolism
TRINITY_DN12943_c0_g1	sbi:8065598	75	2.1e-16	-	mitogen-activated protein kinase 12 isoform X1	K20538	mitogen-activated protein kinase 8	EC:2.7.11.24	sbi04016	MAPK signaling pathway - plant	Environmental Information Processing	Signal transduction
TRINITY_DN12944_c0_g1	mng:MNEG_3587	68.4	5.4e-29	-	Splicing factor U2af small subunit B	K12836	splicing factor U2AF 35 kDa subunit	-	mng03040	Spliceosome	Genetic Information Processing	Transcription
TRINITY_DN12956_c0_g2	lang:109330310	67.9	6.9e-27	-	ras-related protein RHN1-like	K07889	Ras-related protein Rab-5C	-	lang04144	Endocytosis	Cellular Processes	Transport and catabolism
TRINITY_DN12956_c0_g2	lang:109330310	67.9	6.9e-27	-	ras-related protein RHN1-like	K07889	Ras-related protein Rab-5C	-	lang04145	Phagosome	Cellular Processes	Transport and catabolism
TRINITY_DN12960_c0_g1	osa:4332082	66	2.1e-32	-	superoxide dismutase [Cu-Zn] 2 isoform X1	K04565	superoxide dismutase, Cu-Zn family	EC:1.15.1.1	osa04146	Peroxisome	Cellular Processes	Transport and catabolism
TRINITY_DN12962_c0_g1	osa:4329967	100	4.6e-39	NA	NA	NA	NA	NA	NA	NA	NA	NA
TRINITY_DN12976_c0_g1	cam:101488888	65	6.7e-17	-	type I inositol 1	K20279	synaptojanin	EC:3.1.3.36	cam00562	Inositol phosphate metabolism	Metabolism	Carbohydrate metabolism
TRINITY_DN12976_c0_g1	cam:101488888	65	6.7e-17	-	type I inositol 1	K20279	synaptojanin	EC:3.1.3.36	cam04070	Phosphatidylinositol signaling system	Environmental Information Processing	Signal transduction
TRINITY_DN12997_c0_g1	nta:107803596	69.1	1.3e-112	NA	NA	NA	NA	NA	NA	NA	NA	NA
TRINITY_DN13007_c1_g1	osa:4340427	100	1.4e-39	-	LRR receptor-like serine/threonine-protein kinase ERECTA	K20718	LRR receptor-like serine/threonine-protein kinase ERECTA	EC:2.7.11.1	osa04016	MAPK signaling pathway - plant	Environmental Information Processing	Signal transduction
TRINITY_DN13007_c1_g3	obr:102719363	98.7	4.2e-39	-	LRR receptor-like serine/threonine-protein kinase ERECTA	K20718	LRR receptor-like serine/threonine-protein kinase ERECTA	EC:2.7.11.1	obr04016	MAPK signaling pathway - plant	Environmental Information Processing	Signal transduction
TRINITY_DN13017_c0_g1	gmx:100818933	100	9.5e-45	NA	NA	NA	NA	NA	NA	NA	NA	NA
TRINITY_DN13029_c0_g1	gmx:100788642	100	3.1e-28	-	protein transport protein SEC31 homolog B-like	K14005	protein transport protein SEC31	-	gmx04141	Protein processing in endoplasmic reticulum	Genetic Information Processing	Folding, sorting and degradation
TRINITY_DN13048_c0_g2	zju:107411812	83.5	5.7e-29	-	eukaryotic translation initiation factor 3 subunit A-like	K03254	translation initiation factor 3 subunit A	-	zju03013	RNA transport	Genetic Information Processing	Translation
TRINITY_DN13098_c0_g1	gmx:100810922	100	3.3e-32	NA	NA	NA	NA	NA	NA	NA	NA	NA
TRINITY_DN13109_c0_g1	gmx:100816176	100	2.6e-35	-	U5 small nuclear ribonucleoprotein 200 kDa helicase-like	K12854	pre-mRNA-splicing helicase BRR2	EC:3.6.4.13	gmx03040	Spliceosome	Genetic Information Processing	Transcription
TRINITY_DN13121_c0_g1	gmx:100786124	100	2.6e-33	-	probable pectinesterase/pectinesterase inhibitor 20	K01051	pectinesterase	EC:3.1.1.11	gmx00040	Pentose and glucuronate interconversions	Metabolism	Carbohydrate metabolism
TRINITY_DN13123_c0_g1	ghi:107887550	55.3	3.2e-18	NA	NA	NA	NA	NA	NA	NA	NA	NA
TRINITY_DN13135_c0_g1	vvi:100247800	34.2	1.7e-06	-	F-actin-capping protein subunit alpha	K10364	capping protein (actin filament) muscle Z-line, alpha	-	vvi04144	Endocytosis	Cellular Processes	Transport and catabolism
TRINITY_DN13143_c0_g1	bna:106417279	45.8	7.1e-06	NA	NA	NA	NA	NA	NA	NA	NA	NA
TRINITY_DN13147_c0_g2	apro:F751_5524	47.4	3.4e-06	NA	NA	NA	NA	NA	NA	NA	NA	NA
TRINITY_DN13147_c0_g3	ota:OT_ostta06g04160	56.2	1.3e-17	NA	NA	NA	NA	NA	NA	NA	NA	NA
TRINITY_DN13183_c0_g1	gmx:100127421	100	3.8e-29	WRKY19	probable WRKY transcription factor 25	K13424	WRKY transcription factor 33	-	gmx04016	MAPK signaling pathway - plant	Environmental Information Processing	Signal transduction
TRINITY_DN13183_c0_g1	gmx:100127421	100	3.8e-29	WRKY19	probable WRKY transcription factor 25	K13424	WRKY transcription factor 33	-	gmx04626	Plant-pathogen interaction	Organismal Systems	Environmental adaptation
TRINITY_DN13207_c0_g1	ats:109757316	58.3	1.3e-08	NA	NA	NA	NA	NA	NA	NA	NA	NA
TRINITY_DN13279_c0_g1	gmx:100527796	100	8.1e-38	NA	NA	NA	NA	NA	NA	NA	NA	NA
TRINITY_DN13297_c0_g1	gra:105776055	52.6	4.4e-27	-	anaphase-promoting complex subunit 1	K03348	anaphase-promoting complex subunit 1	-	gra04120	Ubiquitin mediated proteolysis	Genetic Information Processing	Folding, sorting and degradation
TRINITY_DN13344_c0_g1	han:110889498	39.2	3e-10	-	long chain acyl-CoA synthetase 9	K01897	long-chain acyl-CoA synthetase	EC:6.2.1.3	han00061	Fatty acid biosynthesis	Metabolism	Lipid metabolism
TRINITY_DN13344_c0_g1	han:110889498	39.2	3e-10	-	long chain acyl-CoA synthetase 9	K01897	long-chain acyl-CoA synthetase	EC:6.2.1.3	han00071	Fatty acid degradation	Metabolism	Lipid metabolism
TRINITY_DN13344_c0_g1	han:110889498	39.2	3e-10	-	long chain acyl-CoA synthetase 9	K01897	long-chain acyl-CoA synthetase	EC:6.2.1.3	han04146	Peroxisome	Cellular Processes	Transport and catabolism
TRINITY_DN13348_c0_g1	zju:107423917	83.6	7.4e-29	-	40S ribosomal protein S29-like	K02980	small subunit ribosomal protein S29e	-	zju03010	Ribosome	Genetic Information Processing	Translation
TRINITY_DN13361_c0_g3	rcu:8284035	78	1.9e-11	-	ABC transporter B family member 9	K05658	ATP-binding cassette, subfamily B (MDR/TAP), member 1	EC:3.6.3.44	rcu02010	ABC transporters	Environmental Information Processing	Membrane transport
TRINITY_DN1336_c0_g1	han:110867816	46.4	8.4e-09	NA	NA	NA	NA	NA	NA	NA	NA	NA
TRINITY_DN13380_c0_g1	gmx:100784916	100	2e-32	NA	NA	NA	NA	NA	NA	NA	NA	NA
TRINITY_DN13391_c0_g1	gmx:100793958	100	2.3e-100	-	pathogenesis-related protein 1-like	K13449	pathogenesis-related protein 1	-	gmx04016	MAPK signaling pathway - plant	Environmental Information Processing	Signal transduction
TRINITY_DN13391_c0_g1	gmx:100793958	100	2.3e-100	-	pathogenesis-related protein 1-like	K13449	pathogenesis-related protein 1	-	gmx04075	Plant hormone signal transduction	Environmental Information Processing	Signal transduction
TRINITY_DN13391_c0_g1	gmx:100793958	100	2.3e-100	-	pathogenesis-related protein 1-like	K13449	pathogenesis-related protein 1	-	gmx04626	Plant-pathogen interaction	Organismal Systems	Environmental adaptation
TRINITY_DN13396_c0_g1	osa:4351684	94.3	3.9e-31	-	2-oxoisovalerate dehydrogenase subunit alpha 2	K00166	2-oxoisovalerate dehydrogenase E1 component alpha subunit	EC:1.2.4.4	osa00640	Propanoate metabolism	Metabolism	Carbohydrate metabolism
TRINITY_DN13396_c0_g1	osa:4351684	94.3	3.9e-31	-	2-oxoisovalerate dehydrogenase subunit alpha 2	K00166	2-oxoisovalerate dehydrogenase E1 component alpha subunit	EC:1.2.4.4	osa00280	Valine, leucine and isoleucine degradation	Metabolism	Amino acid metabolism
TRINITY_DN13401_c0_g1	osa:4336070	100	1.1e-14	NA	NA	NA	NA	NA	NA	NA	NA	NA
TRINITY_DN13402_c0_g1	bna:106419631	65.7	1.5e-19	-	probable pectinesterase 68	K01051	pectinesterase	EC:3.1.1.11	bna00040	Pentose and glucuronate interconversions	Metabolism	Carbohydrate metabolism
TRINITY_DN1340_c0_g1	osa:4339800	100	5.4e-33	-	V-type proton ATPase subunit C	K02148	V-type H+-transporting ATPase subunit C	-	osa00190	Oxidative phosphorylation	Metabolism	Energy metabolism
TRINITY_DN1340_c0_g1	osa:4339800	100	5.4e-33	-	V-type proton ATPase subunit C	K02148	V-type H+-transporting ATPase subunit C	-	osa04145	Phagosome	Cellular Processes	Transport and catabolism
TRINITY_DN13411_c0_g2	osa:4340389	100	4.5e-29	-	nucleolar GTP-binding protein 1	K06943	nucleolar GTP-binding protein	-	osa03008	Ribosome biogenesis in eukaryotes	Genetic Information Processing	Translation
TRINITY_DN13411_c0_g3	osa:4340389	100	5.5e-30	-	nucleolar GTP-binding protein 1	K06943	nucleolar GTP-binding protein	-	osa03008	Ribosome biogenesis in eukaryotes	Genetic Information Processing	Translation
TRINITY_DN13412_c0_g2	osa:4336870	97.3	1.5e-38	-	cell division cycle 20.2	K03363	cell division cycle 20, cofactor of APC complex	-	osa04120	Ubiquitin mediated proteolysis	Genetic Information Processing	Folding, sorting and degradation
TRINITY_DN13417_c0_g1	ccaj:109807259	54.2	2.1e-54	-	60S ribosomal protein L4	K02930	large subunit ribosomal protein L4e	-	ccaj03010	Ribosome	Genetic Information Processing	Translation
TRINITY_DN13441_c0_g1	han:110927170	57.5	1.1e-21	-	glucan endo-1	K19892	glucan endo-1,3-beta-glucosidase 4	EC:3.2.1.39	han00500	Starch and sucrose metabolism	Metabolism	Carbohydrate metabolism
TRINITY_DN13472_c0_g1	sbi:8062834	40.9	1.7e-32	-	tetratricopeptide repeat protein SKI3	K12600	superkiller protein 3	-	sbi03018	RNA degradation	Genetic Information Processing	Folding, sorting and degradation
TRINITY_DN13481_c0_g1	gmx:100785163	100	6.2e-40	-	serine decarboxylase 1	K01590	histidine decarboxylase	EC:4.1.1.22	gmx00340	Histidine metabolism	Metabolism	Amino acid metabolism
TRINITY_DN13482_c0_g1	gmx:100797625	100	7.5e-33	-	mediator of RNA polymerase II transcription subunit 36a-like	K14563	rRNA 2'-O-methyltransferase fibrillarin	EC:2.1.1.-	gmx03008	Ribosome biogenesis in eukaryotes	Genetic Information Processing	Translation
TRINITY_DN13501_c0_g1	mus:103997955	36.2	1.7e-06	NA	NA	NA	NA	NA	NA	NA	NA	NA
TRINITY_DN13502_c0_g1	fve:101312685	38.5	1.9e-10	-	photosystem I reaction center subunit IV B	K02693	photosystem I subunit IV	-	fve00195	Photosynthesis	Metabolism	Energy metabolism
TRINITY_DN13505_c0_g1	gmx:100499867	98.7	1.5e-36	-	uncharacterized LOC100499867	K00417	ubiquinol-cytochrome c reductase subunit 7	-	gmx00190	Oxidative phosphorylation	Metabolism	Energy metabolism
TRINITY_DN13563_c0_g1	gmx:100804452	100	1.1e-36	NA	NA	NA	NA	NA	NA	NA	NA	NA
TRINITY_DN13583_c0_g1	osa:4342610	100	1.7e-26	-	methylmalonate-semialdehyde dehydrogenase [acylating]	K00140	malonate-semialdehyde dehydrogenase (acetylating) / methylmalonate-semialdehyde dehydrogenase	EC:1.2.1.18 1.2.1.27	osa00640	Propanoate metabolism	Metabolism	Carbohydrate metabolism
TRINITY_DN13583_c0_g1	osa:4342610	100	1.7e-26	-	methylmalonate-semialdehyde dehydrogenase [acylating]	K00140	malonate-semialdehyde dehydrogenase (acetylating) / methylmalonate-semialdehyde dehydrogenase	EC:1.2.1.18 1.2.1.27	osa00562	Inositol phosphate metabolism	Metabolism	Carbohydrate metabolism
TRINITY_DN13583_c0_g1	osa:4342610	100	1.7e-26	-	methylmalonate-semialdehyde dehydrogenase [acylating]	K00140	malonate-semialdehyde dehydrogenase (acetylating) / methylmalonate-semialdehyde dehydrogenase	EC:1.2.1.18 1.2.1.27	osa00280	Valine, leucine and isoleucine degradation	Metabolism	Amino acid metabolism
TRINITY_DN13583_c0_g1	osa:4342610	100	1.7e-26	-	methylmalonate-semialdehyde dehydrogenase [acylating]	K00140	malonate-semialdehyde dehydrogenase (acetylating) / methylmalonate-semialdehyde dehydrogenase	EC:1.2.1.18 1.2.1.27	osa00410	beta-Alanine metabolism	Metabolism	Metabolism of other amino acids
TRINITY_DN13586_c0_g1	nta:107775294	54.3	4e-15	-	inosine-5'-monophosphate dehydrogenase 2-like	K00088	IMP dehydrogenase	EC:1.1.1.205	nta00230	Purine metabolism	Metabolism	Nucleotide metabolism
TRINITY_DN13594_c0_g1	rcu:8262267	65.1	2.1e-169	NA	NA	NA	NA	NA	NA	NA	NA	NA
TRINITY_DN13595_c0_g1	gmx:100790425	100	7.7e-32	-	26S proteasome non-ATPase regulatory subunit 1 homolog A-like	K03032	26S proteasome regulatory subunit N2	-	gmx03050	Proteasome	Genetic Information Processing	Folding, sorting and degradation
TRINITY_DN13614_c0_g1	fve:101303754	64.5	4.4e-19	-	replication factor C subunit 3-like	K10756	replication factor C subunit 3/5	-	fve03030	DNA replication	Genetic Information Processing	Replication and repair
TRINITY_DN13614_c0_g1	fve:101303754	64.5	4.4e-19	-	replication factor C subunit 3-like	K10756	replication factor C subunit 3/5	-	fve03420	Nucleotide excision repair	Genetic Information Processing	Replication and repair
TRINITY_DN13614_c0_g1	fve:101303754	64.5	4.4e-19	-	replication factor C subunit 3-like	K10756	replication factor C subunit 3/5	-	fve03430	Mismatch repair	Genetic Information Processing	Replication and repair
TRINITY_DN13614_c0_g3	cpap:110817085	65.6	1.7e-26	-	replication factor C subunit 3-like	K10756	replication factor C subunit 3/5	-	cpap03030	DNA replication	Genetic Information Processing	Replication and repair
TRINITY_DN13614_c0_g3	cpap:110817085	65.6	1.7e-26	-	replication factor C subunit 3-like	K10756	replication factor C subunit 3/5	-	cpap03420	Nucleotide excision repair	Genetic Information Processing	Replication and repair
TRINITY_DN13614_c0_g3	cpap:110817085	65.6	1.7e-26	-	replication factor C subunit 3-like	K10756	replication factor C subunit 3/5	-	cpap03430	Mismatch repair	Genetic Information Processing	Replication and repair
TRINITY_DN1361_c0_g2	osa:4324904	100	6.6e-34	-	signal recognition particle subunit SRP72	K03108	signal recognition particle subunit SRP72	-	osa03060	Protein export	Genetic Information Processing	Folding, sorting and degradation
TRINITY_DN13650_c0_g1	sind:105155489	46.5	1.4e-13	NA	NA	NA	NA	NA	NA	NA	NA	NA
TRINITY_DN1367_c0_g1	vcn:VOLCADRAFT_107705	56.8	6.4e-41	rps12	component of cytosolic 80S ribosome and 40S small subunit	K02951	small subunit ribosomal protein S12e	-	vcn03010	Ribosome	Genetic Information Processing	Translation
TRINITY_DN13683_c0_g1	egr:104453907	74	2.3e-32	-	beta-glucosidase 40	K01188	beta-glucosidase	EC:3.2.1.21	egr00500	Starch and sucrose metabolism	Metabolism	Carbohydrate metabolism
TRINITY_DN13683_c0_g1	egr:104453907	74	2.3e-32	-	beta-glucosidase 40	K01188	beta-glucosidase	EC:3.2.1.21	egr00460	Cyanoamino acid metabolism	Metabolism	Metabolism of other amino acids
TRINITY_DN13683_c0_g1	egr:104453907	74	2.3e-32	-	beta-glucosidase 40	K01188	beta-glucosidase	EC:3.2.1.21	egr00940	Phenylpropanoid biosynthesis	Metabolism	Biosynthesis of other secondary metabolites
TRINITY_DN1368_c0_g1	osa:9270404	100	4.4e-28	NA	NA	NA	NA	NA	NA	NA	NA	NA
TRINITY_DN136_c0_g1	bvg:104887063	34.5	7e-06	NA	NA	NA	NA	NA	NA	NA	NA	NA
TRINITY_DN13702_c0_g1	spen:107026720	65	3.7e-30	-	auxin-induced protein 15A-like	K14488	SAUR family protein	-	spen04075	Plant hormone signal transduction	Environmental Information Processing	Signal transduction
TRINITY_DN1372_c0_g1	gmx:100796311	94.4	1.5e-30	-	peroxidase 5-like	K00430	peroxidase	EC:1.11.1.7	gmx00940	Phenylpropanoid biosynthesis	Metabolism	Biosynthesis of other secondary metabolites
TRINITY_DN13734_c0_g2	gmx:100816352	100	4e-36	NA	NA	NA	NA	NA	NA	NA	NA	NA
TRINITY_DN13744_c0_g1	vvi:100247531	83.8	5.6e-159	-	WD repeat-containing protein 82-B	K14962	COMPASS component SWD2	-	vvi03015	mRNA surveillance pathway	Genetic Information Processing	Translation
TRINITY_DN13752_c0_g1	cme:CYME_CMH218C	65.5	1.8e-27	-	40S ribosomal protein S4	K02987	small subunit ribosomal protein S4e	-	cme03010	Ribosome	Genetic Information Processing	Translation
TRINITY_DN13755_c0_g1	smo:SELMODRAFT_444379	34.7	1.2e-24	NA	NA	NA	NA	NA	NA	NA	NA	NA
TRINITY_DN13771_c0_g1	osa:4331259	100	6.2e-31	NA	NA	NA	NA	NA	NA	NA	NA	NA
TRINITY_DN13824_c0_g1	cic:CICLE_v10027727mg	56.1	4.1e-14	-	hypothetical protein	K00679	phospholipid:diacylglycerol acyltransferase	EC:2.3.1.158	cic00561	Glycerolipid metabolism	Metabolism	Lipid metabolism
TRINITY_DN13824_c0_g2	cic:CICLE_v10027727mg	67.6	2.2e-23	-	hypothetical protein	K00679	phospholipid:diacylglycerol acyltransferase	EC:2.3.1.158	cic00561	Glycerolipid metabolism	Metabolism	Lipid metabolism
TRINITY_DN13826_c0_g1	osa:4346497	100	4e-34	NA	NA	NA	NA	NA	NA	NA	NA	NA
TRINITY_DN13826_c0_g2	osa:4346497	98.6	1.9e-17	NA	NA	NA	NA	NA	NA	NA	NA	NA
TRINITY_DN13829_c0_g1	cpap:110808666	100	3.4e-27	-	small nuclear ribonucleoprotein SmD1a-like	K11087	small nuclear ribonucleoprotein D1	-	cpap03040	Spliceosome	Genetic Information Processing	Transcription
TRINITY_DN13837_c0_g1	smo:SELMODRAFT_10835	56.1	1.7e-12	-	hypothetical protein	K05681	ATP-binding cassette, subfamily G (WHITE), member 2	-	smo02010	ABC transporters	Environmental Information Processing	Membrane transport
TRINITY_DN13845_c0_g1	mus:103986044	76	3.5e-28	NA	NA	NA	NA	NA	NA	NA	NA	NA
TRINITY_DN13849_c0_g1	nta:107763494	69.5	1.1e-39	NA	NA	NA	NA	NA	NA	NA	NA	NA
TRINITY_DN13864_c0_g1	ccp:ChcroMp07	51.6	2.2e-68	cob	apocytochrome b	K00412	ubiquinol-cytochrome c reductase cytochrome b subunit	-	ccp00190	Oxidative phosphorylation	Metabolism	Energy metabolism
TRINITY_DN13864_c0_g2	bvg:809471	61.3	5.1e-27	cob	apocytochrome B	K00412	ubiquinol-cytochrome c reductase cytochrome b subunit	-	bvg00190	Oxidative phosphorylation	Metabolism	Energy metabolism
TRINITY_DN13864_c0_g4	ccp:ChcroMp07	55.9	2.3e-108	cob	apocytochrome b	K00412	ubiquinol-cytochrome c reductase cytochrome b subunit	-	ccp00190	Oxidative phosphorylation	Metabolism	Energy metabolism
TRINITY_DN13886_c0_g2	tcc:18607528	46	2.2e-07	-	uncharacterized LOC18607528	K12868	pre-mRNA-splicing factor SYF2	-	tcc03040	Spliceosome	Genetic Information Processing	Transcription
TRINITY_DN13888_c0_g1	jcu:105630836	84	1.5e-60	-	NADH dehydrogenase [ubiquinone] iron-sulfur protein 4	K03937	NADH dehydrogenase (ubiquinone) Fe-S protein 4	-	jcu00190	Oxidative phosphorylation	Metabolism	Energy metabolism
TRINITY_DN13893_c0_g1	smo:SELMODRAFT_109541	43.5	3.4e-08	NA	NA	NA	NA	NA	NA	NA	NA	NA
TRINITY_DN13921_c0_g1	csat:104781134	56.1	2.6e-16	-	beta-galactosidase 2-like	K12309	beta-galactosidase	EC:3.2.1.23	csat00052	Galactose metabolism	Metabolism	Carbohydrate metabolism
TRINITY_DN13921_c0_g1	csat:104781134	56.1	2.6e-16	-	beta-galactosidase 2-like	K12309	beta-galactosidase	EC:3.2.1.23	csat00600	Sphingolipid metabolism	Metabolism	Lipid metabolism
TRINITY_DN13921_c0_g1	csat:104781134	56.1	2.6e-16	-	beta-galactosidase 2-like	K12309	beta-galactosidase	EC:3.2.1.23	csat00531	Glycosaminoglycan degradation	Metabolism	Glycan biosynthesis and metabolism
TRINITY_DN13921_c0_g1	csat:104781134	56.1	2.6e-16	-	beta-galactosidase 2-like	K12309	beta-galactosidase	EC:3.2.1.23	csat00604	Glycosphingolipid biosynthesis - ganglio series	Metabolism	Glycan biosynthesis and metabolism
TRINITY_DN13921_c0_g1	csat:104781134	56.1	2.6e-16	-	beta-galactosidase 2-like	K12309	beta-galactosidase	EC:3.2.1.23	csat00511	Other glycan degradation	Metabolism	Glycan biosynthesis and metabolism
TRINITY_DN13936_c1_g2	gmx:100802244	100	6.9e-31	-	cationic peroxidase 1	K00430	peroxidase	EC:1.11.1.7	gmx00940	Phenylpropanoid biosynthesis	Metabolism	Biosynthesis of other secondary metabolites
TRINITY_DN13957_c0_g1	rcu:107262039	93.8	7.7e-35	-	dolichol-phosphate mannose synthase subunit 2	K09658	dolichyl-phosphate mannosyltransferase polypeptide 2, regulatory subunit	-	rcu00510	N-Glycan biosynthesis	Metabolism	Glycan biosynthesis and metabolism
TRINITY_DN13957_c0_g1	rcu:107262039	93.8	7.7e-35	-	dolichol-phosphate mannose synthase subunit 2	K09658	dolichyl-phosphate mannosyltransferase polypeptide 2, regulatory subunit	-	rcu00563	Glycosylphosphatidylinositol(GPI)-anchor biosynthesis	Metabolism	Glycan biosynthesis and metabolism
TRINITY_DN13971_c0_g1	sita:101771169	75.9	1.5e-28	-	vacuolar-sorting receptor 1	K01859	chalcone isomerase	EC:5.5.1.6	sita00941	Flavonoid biosynthesis	Metabolism	Biosynthesis of other secondary metabolites
TRINITY_DN13984_c0_g1	gmx:547584	100	2.8e-84	GSTU42	glutathione S-transferase GST 15	K00799	glutathione S-transferase	EC:2.5.1.18	gmx00480	Glutathione metabolism	Metabolism	Metabolism of other amino acids
TRINITY_DN13985_c0_g2	gra:105780734	51.7	8.9e-09	-	probable terpene synthase 12	K12742	isoprene synthase	EC:4.2.3.27	gra00900	Terpenoid backbone biosynthesis	Metabolism	Metabolism of terpenoids and polyketides
TRINITY_DN13996_c0_g2	nnu:104599484	64.2	2.1e-15	NA	NA	NA	NA	NA	NA	NA	NA	NA
TRINITY_DN14058_c0_g2	gmx:100306106	100	7.5e-51	-	uncharacterized LOC100306106	K03943	NADH dehydrogenase (ubiquinone) flavoprotein 2	EC:1.6.5.3 1.6.99.3	gmx00190	Oxidative phosphorylation	Metabolism	Energy metabolism
TRINITY_DN14063_c0_g1	gsl:Gasu_19110	56.5	8.8e-19	-	60S ribosomal protein L34e	K02915	large subunit ribosomal protein L34e	-	gsl03010	Ribosome	Genetic Information Processing	Translation
TRINITY_DN14063_c0_g2	apro:F751_3610	53.8	5.7e-17	-	60S ribosomal protein L34	K02915	large subunit ribosomal protein L34e	-	apro03010	Ribosome	Genetic Information Processing	Translation
TRINITY_DN14063_c0_g3	apro:F751_3610	58.2	9.8e-24	-	60S ribosomal protein L34	K02915	large subunit ribosomal protein L34e	-	apro03010	Ribosome	Genetic Information Processing	Translation
TRINITY_DN14070_c0_g1	gmx:100526902	98.7	1.1e-36	-	uncharacterized LOC100526902	K12885	heterogeneous nuclear ribonucleoprotein G	-	gmx03040	Spliceosome	Genetic Information Processing	Transcription
TRINITY_DN14113_c0_g4	han:110868757	35.9	3.3e-08	NA	NA	NA	NA	NA	NA	NA	NA	NA
TRINITY_DN14120_c0_g2	mng:MNEG_10773	45.2	2e-10	-	hypothetical protein	K01611	S-adenosylmethionine decarboxylase	EC:4.1.1.50	mng00270	Cysteine and methionine metabolism	Metabolism	Amino acid metabolism
TRINITY_DN14120_c0_g2	mng:MNEG_10773	45.2	2e-10	-	hypothetical protein	K01611	S-adenosylmethionine decarboxylase	EC:4.1.1.50	mng00330	Arginine and proline metabolism	Metabolism	Amino acid metabolism
TRINITY_DN1414_c0_g1	osa:4338979	98.7	5e-37	-	delta-1-pyrroline-5-carboxylate synthase	K12657	delta-1-pyrroline-5-carboxylate synthetase	EC:2.7.2.11 1.2.1.41	osa00330	Arginine and proline metabolism	Metabolism	Amino acid metabolism
TRINITY_DN14156_c0_g1	ghi:107944111	63.2	1.1e-16	NA	NA	NA	NA	NA	NA	NA	NA	NA
TRINITY_DN14158_c0_g1	gmx:100803637	100	1.3e-34	-	peroxidase P7-like	K00430	peroxidase	EC:1.11.1.7	gmx00940	Phenylpropanoid biosynthesis	Metabolism	Biosynthesis of other secondary metabolites
TRINITY_DN14160_c0_g1	smo:SELMODRAFT_157928	46.8	9.8e-08	-	hypothetical protein	K10260	F-box and WD-40 domain protein 7	-	smo04120	Ubiquitin mediated proteolysis	Genetic Information Processing	Folding, sorting and degradation
TRINITY_DN14169_c0_g1	thj:104807275	60.7	2.8e-50	NA	NA	NA	NA	NA	NA	NA	NA	NA
TRINITY_DN14181_c0_g1	gmx:100499808	100	1.2e-55	-	uncharacterized LOC100499808	K02266	cytochrome c oxidase subunit 6a	-	gmx00190	Oxidative phosphorylation	Metabolism	Energy metabolism
TRINITY_DN14199_c0_g1	smo:SELMODRAFT_437676	52.9	1.4e-06	-	hypothetical protein	K01870	isoleucyl-tRNA synthetase	EC:6.1.1.5	smo00970	Aminoacyl-tRNA biosynthesis	Genetic Information Processing	Translation
TRINITY_DN141_c0_g1	brp:103868752	77.6	1.6e-21	NA	NA	NA	NA	NA	NA	NA	NA	NA
TRINITY_DN14208_c0_g1	egu:105048553	40	8.6e-06	NA	NA	NA	NA	NA	NA	NA	NA	NA
TRINITY_DN14216_c0_g1	sita:101756966	55.8	8.7e-07	NA	NA	NA	NA	NA	NA	NA	NA	NA
TRINITY_DN14218_c0_g1	zma:100285141	54.3	3.2e-19	-	calmodulin	K02183	calmodulin	-	zma04016	MAPK signaling pathway - plant	Environmental Information Processing	Signal transduction
TRINITY_DN14218_c0_g1	zma:100285141	54.3	3.2e-19	-	calmodulin	K02183	calmodulin	-	zma04070	Phosphatidylinositol signaling system	Environmental Information Processing	Signal transduction
TRINITY_DN14218_c0_g1	zma:100285141	54.3	3.2e-19	-	calmodulin	K02183	calmodulin	-	zma04626	Plant-pathogen interaction	Organismal Systems	Environmental adaptation
TRINITY_DN14230_c0_g1	osa:4325355	100	3.5e-26	NA	NA	NA	NA	NA	NA	NA	NA	NA
TRINITY_DN14246_c0_g1	gmx:100500081	98.6	1.2e-32	-	uncharacterized LOC100500081	K13448	calcium-binding protein CML	-	gmx04626	Plant-pathogen interaction	Organismal Systems	Environmental adaptation
TRINITY_DN14252_c0_g1	gmx:547823	100	6.2e-47	SODB	Fe-superoxide dismutase	K04564	superoxide dismutase, Fe-Mn family	EC:1.15.1.1	gmx04146	Peroxisome	Cellular Processes	Transport and catabolism
TRINITY_DN14286_c0_g1	olu:OSTLU_29046	45.7	2.8e-08	-	thioredoxin reductase	K22182	thioredoxin reductase (NADPH)	EC:1.8.1.9	olu00450	Selenocompound metabolism	Metabolism	Metabolism of other amino acids
TRINITY_DN14295_c0_g1	osa:4329911	100	8e-34	-	4-hydroxy-3-methylbut-2-en-1-yl diphosphate synthase (ferredoxin)	K03526	(E)-4-hydroxy-3-methylbut-2-enyl-diphosphate synthase	EC:1.17.7.1 1.17.7.3	osa00900	Terpenoid backbone biosynthesis	Metabolism	Metabolism of terpenoids and polyketides
TRINITY_DN14312_c0_g1	han:110883889	51.5	8e-55	-	RPM1-interacting protein 4-like	K13456	RPM1-interacting protein 4	-	han04626	Plant-pathogen interaction	Organismal Systems	Environmental adaptation
TRINITY_DN14325_c0_g1	osa:4323904	100	4.7e-26	-	60S ribosomal protein L29-1	K02905	large subunit ribosomal protein L29e	-	osa03010	Ribosome	Genetic Information Processing	Translation
TRINITY_DN14335_c0_g1	bpg:Bathy01g05270	42.6	5.7e-06	-	hypothetical protein	K19269	phosphoglycolate phosphatase	EC:3.1.3.18 3.1.3.48	bpg00630	Glyoxylate and dicarboxylate metabolism	Metabolism	Carbohydrate metabolism
TRINITY_DN14335_c0_g3	egr:104447513	48.6	1.5e-12	-	phosphoglycolate phosphatase 2	K19269	phosphoglycolate phosphatase	EC:3.1.3.18 3.1.3.48	egr00630	Glyoxylate and dicarboxylate metabolism	Metabolism	Carbohydrate metabolism
TRINITY_DN1433_c0_g2	ccp:CHC_T00010205001	67.8	2.4e-38	-	60S ribosomal protein L27A	K02900	large subunit ribosomal protein L27Ae	-	ccp03010	Ribosome	Genetic Information Processing	Translation
TRINITY_DN14344_c0_g1	mcha:111020839	55.3	4.2e-21	NA	NA	NA	NA	NA	NA	NA	NA	NA
TRINITY_DN14361_c0_g1	csl:COCSUDRAFT_47721	57.5	9.4e-17	NA	NA	NA	NA	NA	NA	NA	NA	NA
TRINITY_DN14388_c0_g1	gmx:100499908	100	7.3e-27	-	uncharacterized LOC100499908	K12877	protein mago nashi	-	gmx03040	Spliceosome	Genetic Information Processing	Transcription
TRINITY_DN14388_c0_g1	gmx:100499908	100	7.3e-27	-	uncharacterized LOC100499908	K12877	protein mago nashi	-	gmx03013	RNA transport	Genetic Information Processing	Translation
TRINITY_DN14388_c0_g1	gmx:100499908	100	7.3e-27	-	uncharacterized LOC100499908	K12877	protein mago nashi	-	gmx03015	mRNA surveillance pathway	Genetic Information Processing	Translation
TRINITY_DN14396_c0_g1	gmx:100804567	100	1e-20	NA	NA	NA	NA	NA	NA	NA	NA	NA
TRINITY_DN14402_c0_g1	cme:CYME_CMP152C	75.7	3.2e-28	-	cytochrome c reductase cytochrome c1 subunit	K00413	ubiquinol-cytochrome c reductase cytochrome c1 subunit	-	cme00190	Oxidative phosphorylation	Metabolism	Energy metabolism
TRINITY_DN14409_c0_g1	tcc:18600574	78.6	2.3e-26	NA	NA	NA	NA	NA	NA	NA	NA	NA
TRINITY_DN14409_c0_g2	vvi:100254544	69.7	4.6e-29	NA	NA	NA	NA	NA	NA	NA	NA	NA
TRINITY_DN14426_c0_g1	osa:4337360	100	1.9e-35	-	probable polyamine oxidase 4	K17839	polyamine oxidase	EC:1.5.3.17 1.5.3.-	osa00330	Arginine and proline metabolism	Metabolism	Amino acid metabolism
TRINITY_DN14426_c0_g1	osa:4337360	100	1.9e-35	-	probable polyamine oxidase 4	K17839	polyamine oxidase	EC:1.5.3.17 1.5.3.-	osa00410	beta-Alanine metabolism	Metabolism	Metabolism of other amino acids
TRINITY_DN14429_c0_g1	gmx:100798235	100	1.1e-31	NA	NA	NA	NA	NA	NA	NA	NA	NA
TRINITY_DN14431_c0_g1	ats:109762497	84.7	1e-23	LOC109762497	LOW QUALITY PROTEIN: 5'-3' exoribonuclease 4-like	K20553	5'-3' exoribonuclease 4	EC:3.1.13.-	ats04016	MAPK signaling pathway - plant	Environmental Information Processing	Signal transduction
TRINITY_DN14435_c0_g1	olu:OSTLU_28526	32.9	1.3e-06	NA	NA	NA	NA	NA	NA	NA	NA	NA
TRINITY_DN14441_c1_g2	han:110928919	49.1	7.2e-13	NA	NA	NA	NA	NA	NA	NA	NA	NA
TRINITY_DN14450_c0_g1	lang:109329464	64.3	3e-09	-	berberine bridge enzyme-like 21	K01187	alpha-glucosidase	EC:3.2.1.20	lang00052	Galactose metabolism	Metabolism	Carbohydrate metabolism
TRINITY_DN14450_c0_g1	lang:109329464	64.3	3e-09	-	berberine bridge enzyme-like 21	K01187	alpha-glucosidase	EC:3.2.1.20	lang00500	Starch and sucrose metabolism	Metabolism	Carbohydrate metabolism
TRINITY_DN14493_c0_g1	csl:COCSUDRAFT_37891	55.2	1.2e-21	-	HECT-domain-containing protein	K10592	E3 ubiquitin-protein ligase HUWE1	EC:2.3.2.26	csl04120	Ubiquitin mediated proteolysis	Genetic Information Processing	Folding, sorting and degradation
TRINITY_DN14497_c0_g1	ccaj:109818369	97.3	3.3e-81	-	nucleoside diphosphate kinase 1	K00940	nucleoside-diphosphate kinase	EC:2.7.4.6	ccaj00230	Purine metabolism	Metabolism	Nucleotide metabolism
TRINITY_DN14497_c0_g1	ccaj:109818369	97.3	3.3e-81	-	nucleoside diphosphate kinase 1	K00940	nucleoside-diphosphate kinase	EC:2.7.4.6	ccaj00240	Pyrimidine metabolism	Metabolism	Nucleotide metabolism
TRINITY_DN14497_c0_g1	ccaj:109818369	97.3	3.3e-81	-	nucleoside diphosphate kinase 1	K00940	nucleoside-diphosphate kinase	EC:2.7.4.6	ccaj04016	MAPK signaling pathway - plant	Environmental Information Processing	Signal transduction
TRINITY_DN14501_c0_g1	gmx:100798797	57.5	2.3e-14	NA	NA	NA	NA	NA	NA	NA	NA	NA
TRINITY_DN14504_c0_g1	gmx:100784003	97.2	1.7e-26	-	phosphatidylinositol 3	K01110	phosphatidylinositol-3,4,5-trisphosphate 3-phosphatase and dual-specificity protein phosphatase PTEN	EC:3.1.3.16 3.1.3.48 3.1.3.67	gmx00562	Inositol phosphate metabolism	Metabolism	Carbohydrate metabolism
TRINITY_DN14504_c0_g1	gmx:100784003	97.2	1.7e-26	-	phosphatidylinositol 3	K01110	phosphatidylinositol-3,4,5-trisphosphate 3-phosphatase and dual-specificity protein phosphatase PTEN	EC:3.1.3.16 3.1.3.48 3.1.3.67	gmx04070	Phosphatidylinositol signaling system	Environmental Information Processing	Signal transduction
TRINITY_DN14534_c0_g2	osa:4341290	84.5	8.9e-28	NA	NA	NA	NA	NA	NA	NA	NA	NA
TRINITY_DN1454_c0_g1	osa:4342593	100	7.9e-64	NA	NA	NA	NA	NA	NA	NA	NA	NA
TRINITY_DN14564_c0_g1	nnu:104607387	67.4	6.3e-45	NA	NA	NA	NA	NA	NA	NA	NA	NA
TRINITY_DN14624_c0_g1	smo:SELMODRAFT_437348	65.9	1.6e-23	-	hypothetical protein	K00700	1,4-alpha-glucan branching enzyme	EC:2.4.1.18	smo00500	Starch and sucrose metabolism	Metabolism	Carbohydrate metabolism
TRINITY_DN14670_c0_g1	apro:ChprMp035	51.1	4e-58	cox2	cytochrome oxidase subunit II	K02261	cytochrome c oxidase subunit 2	-	apro00190	Oxidative phosphorylation	Metabolism	Energy metabolism
TRINITY_DN14670_c0_g2	csl:CospCoM_p09	50.9	1.2e-56	cox2	cytochrome c oxidase subunit 2	K02261	cytochrome c oxidase subunit 2	-	csl00190	Oxidative phosphorylation	Metabolism	Energy metabolism
TRINITY_DN14670_c0_g3	apro:ChprMp035	53.4	3.8e-56	cox2	cytochrome oxidase subunit II	K02261	cytochrome c oxidase subunit 2	-	apro00190	Oxidative phosphorylation	Metabolism	Energy metabolism
TRINITY_DN14670_c0_g4	apro:ChprMp035	48.5	3.4e-45	cox2	cytochrome oxidase subunit II	K02261	cytochrome c oxidase subunit 2	-	apro00190	Oxidative phosphorylation	Metabolism	Energy metabolism
TRINITY_DN14670_c0_g5	apro:ChprMp035	47.1	1.8e-37	cox2	cytochrome oxidase subunit II	K02261	cytochrome c oxidase subunit 2	-	apro00190	Oxidative phosphorylation	Metabolism	Energy metabolism
TRINITY_DN14680_c0_g1	csl:COCSUDRAFT_30561	61.3	1.3e-30	-	translation initiation factor SU	K03113	translation initiation factor 1	-	csl03013	RNA transport	Genetic Information Processing	Translation
TRINITY_DN14681_c0_g3	zma:100272957	63.9	4.3e-75	NA	NA	NA	NA	NA	NA	NA	NA	NA
TRINITY_DN14685_c0_g2	zju:107405997	69.1	1.8e-20	-	zinc finger CCCH domain-containing protein 16-like	K14321	nucleoporin-like protein 2	-	zju03013	RNA transport	Genetic Information Processing	Translation
TRINITY_DN14722_c0_g1	gmx:100810530	98.7	3.1e-34	NA	NA	NA	NA	NA	NA	NA	NA	NA
TRINITY_DN14726_c1_g1	lang:109350796	80.3	8.6e-20	NA	NA	NA	NA	NA	NA	NA	NA	NA
TRINITY_DN14728_c0_g1	cre:CHLREDRAFT_155464	66.5	1.9e-71	NA	NA	NA	NA	NA	NA	NA	NA	NA
TRINITY_DN14732_c0_g1	cme:CYME_CMM005C	58	1.2e-22	-	probable protein kinase CK2 regulatory subunit CK2B1	K03115	casein kinase II subunit beta	-	cme03008	Ribosome biogenesis in eukaryotes	Genetic Information Processing	Translation
TRINITY_DN14732_c0_g1	cme:CYME_CMM005C	58	1.2e-22	-	probable protein kinase CK2 regulatory subunit CK2B1	K03115	casein kinase II subunit beta	-	cme04712	Circadian rhythm - plant	Organismal Systems	Environmental adaptation
TRINITY_DN14733_c0_g1	hbr:110667649	65.1	3.1e-07	NA	NA	NA	NA	NA	NA	NA	NA	NA
TRINITY_DN14735_c0_g1	nsy:104224633	33.5	1.9e-98	NA	NA	NA	NA	NA	NA	NA	NA	NA
TRINITY_DN14738_c0_g1	pavi:110750369	51.6	1.1e-19	-	alpha-1	K13379	reversibly glycosylated polypeptide / UDP-arabinopyranose mutase	EC:2.4.1.- 5.4.99.30	pavi00520	Amino sugar and nucleotide sugar metabolism	Metabolism	Carbohydrate metabolism
TRINITY_DN14770_c0_g1	osa:4343618	100	8.1e-31	NA	NA	NA	NA	NA	NA	NA	NA	NA
TRINITY_DN14773_c0_g1	gmx:547682	100	5.5e-43	ODC2	ornithine decarboxylase	K01581	ornithine decarboxylase	EC:4.1.1.17	gmx00330	Arginine and proline metabolism	Metabolism	Amino acid metabolism
TRINITY_DN14773_c0_g1	gmx:547682	100	5.5e-43	ODC2	ornithine decarboxylase	K01581	ornithine decarboxylase	EC:4.1.1.17	gmx00480	Glutathione metabolism	Metabolism	Metabolism of other amino acids
TRINITY_DN14777_c0_g1	smo:SELMODRAFT_170205	81	1.6e-22	-	hypothetical protein	K02979	small subunit ribosomal protein S28e	-	smo03010	Ribosome	Genetic Information Processing	Translation
TRINITY_DN14777_c0_g2	smo:SELMODRAFT_170205	81	1.6e-22	-	hypothetical protein	K02979	small subunit ribosomal protein S28e	-	smo03010	Ribosome	Genetic Information Processing	Translation
TRINITY_DN14777_c0_g3	smo:SELMODRAFT_170205	80.3	2.1e-21	-	hypothetical protein	K02979	small subunit ribosomal protein S28e	-	smo03010	Ribosome	Genetic Information Processing	Translation
TRINITY_DN14785_c0_g2	pda:103721226	85.1	7.9e-26	NA	NA	NA	NA	NA	NA	NA	NA	NA
TRINITY_DN14785_c0_g3	ccp:CHC_T00007860001	81.1	7.9e-27	NA	NA	NA	NA	NA	NA	NA	NA	NA
TRINITY_DN14787_c0_g1	apro:F751_1536	46.2	2e-06	-	Eukaryotic translation initiation factor 5	K03262	translation initiation factor 5	-	apro03013	RNA transport	Genetic Information Processing	Translation
TRINITY_DN14787_c0_g2	mis:MICPUN_56138	56.4	8.2e-19	-	predicted protein	K03262	translation initiation factor 5	-	mis03013	RNA transport	Genetic Information Processing	Translation
TRINITY_DN14814_c1_g1	bdi:100837061	79.7	1.1e-23	NA	NA	NA	NA	NA	NA	NA	NA	NA
TRINITY_DN14817_c0_g1	gmx:100306335	100	2.9e-53	-	uncharacterized LOC100306335	K02910	large subunit ribosomal protein L31e	-	gmx03010	Ribosome	Genetic Information Processing	Translation
TRINITY_DN14850_c0_g1	mdm:103414952	56.8	1.4e-15	NA	NA	NA	NA	NA	NA	NA	NA	NA
TRINITY_DN14850_c0_g2	mdm:103414952	90.4	3.1e-28	NA	NA	NA	NA	NA	NA	NA	NA	NA
TRINITY_DN14856_c0_g1	cpap:110819896	100	3.5e-12	-	eukaryotic translation initiation factor 2 subunit gamma-like	K03242	translation initiation factor 2 subunit 3	-	cpap03013	RNA transport	Genetic Information Processing	Translation
TRINITY_DN14886_c0_g2	gsl:Gasu_60010	59.8	3.5e-27	-	glycerol kinase	K00864	glycerol kinase	EC:2.7.1.30	gsl00561	Glycerolipid metabolism	Metabolism	Lipid metabolism
TRINITY_DN14896_c0_g1	osa:9268459	100	1.5e-23	-	60S ribosomal protein L39-3	K02924	large subunit ribosomal protein L39e	-	osa03010	Ribosome	Genetic Information Processing	Translation
TRINITY_DN14899_c0_g2	sind:105165964	46.1	7.5e-13	NA	NA	NA	NA	NA	NA	NA	NA	NA
TRINITY_DN14907_c0_g2	adu:107489062	65.3	5.5e-17	-	lysophospholipid acyltransferase 1-like	K13519	lysophospholipid acyltransferase	EC:2.3.1.51 2.3.1.23 2.3.1.-	adu00561	Glycerolipid metabolism	Metabolism	Lipid metabolism
TRINITY_DN14907_c0_g2	adu:107489062	65.3	5.5e-17	-	lysophospholipid acyltransferase 1-like	K13519	lysophospholipid acyltransferase	EC:2.3.1.51 2.3.1.23 2.3.1.-	adu00564	Glycerophospholipid metabolism	Metabolism	Lipid metabolism
TRINITY_DN14907_c0_g2	adu:107489062	65.3	5.5e-17	-	lysophospholipid acyltransferase 1-like	K13519	lysophospholipid acyltransferase	EC:2.3.1.51 2.3.1.23 2.3.1.-	adu00565	Ether lipid metabolism	Metabolism	Lipid metabolism
TRINITY_DN14915_c0_g1	osa:4346613	100	1.6e-29	NA	NA	NA	NA	NA	NA	NA	NA	NA
TRINITY_DN14925_c0_g1	zma:100276428	48.5	2.6e-13	RS2Z39	arginine/serine-rich splicing factor RS2Z39 transcript VI	K12896	splicing factor, arginine/serine-rich 7	-	zma03040	Spliceosome	Genetic Information Processing	Transcription
TRINITY_DN14931_c0_g1	mdm:103412236	48.3	4.3e-19	-	chaperonin CPN60-2	K04077	chaperonin GroEL	-	mdm03018	RNA degradation	Genetic Information Processing	Folding, sorting and degradation
TRINITY_DN14931_c0_g3	nto:104107563	60.4	1.1e-29	NA	NA	NA	NA	NA	NA	NA	NA	NA
TRINITY_DN14931_c0_g4	obr:102710647	50.7	1.2e-13	NA	NA	NA	NA	NA	NA	NA	NA	NA
TRINITY_DN14934_c0_g1	osa:4339011	100	4.5e-56	-	60S ribosomal protein L36-3	K02920	large subunit ribosomal protein L36e	-	osa03010	Ribosome	Genetic Information Processing	Translation
TRINITY_DN14941_c0_g1	vvi:100261688	81.2	3.6e-147	NA	NA	NA	NA	NA	NA	NA	NA	NA
TRINITY_DN14950_c0_g1	mtr:MTR_8g011330	66.2	9.8e-24	NA	NA	NA	NA	NA	NA	NA	NA	NA
TRINITY_DN14952_c0_g1	gmx:100775561	100	4.9e-30	-	40S ribosomal protein S29	K02980	small subunit ribosomal protein S29e	-	gmx03010	Ribosome	Genetic Information Processing	Translation
TRINITY_DN14957_c0_g1	gmx:100794691	97.6	5.8e-39	NA	NA	NA	NA	NA	NA	NA	NA	NA
TRINITY_DN14986_c0_g1	mdm:103440514	44.9	2.3e-16	-	1-acyl-sn-glycerol-3-phosphate acyltransferase 3	K13523	lysophosphatidic acid acyltransferase / lysophosphatidylinositol acyltransferase	EC:2.3.1.51 2.3.1.-	mdm00561	Glycerolipid metabolism	Metabolism	Lipid metabolism
TRINITY_DN14986_c0_g1	mdm:103440514	44.9	2.3e-16	-	1-acyl-sn-glycerol-3-phosphate acyltransferase 3	K13523	lysophosphatidic acid acyltransferase / lysophosphatidylinositol acyltransferase	EC:2.3.1.51 2.3.1.-	mdm00564	Glycerophospholipid metabolism	Metabolism	Lipid metabolism
TRINITY_DN14986_c0_g2	smo:SELMODRAFT_146320	49	8.3e-07	-	hypothetical protein	K13523	lysophosphatidic acid acyltransferase / lysophosphatidylinositol acyltransferase	EC:2.3.1.51 2.3.1.-	smo00561	Glycerolipid metabolism	Metabolism	Lipid metabolism
TRINITY_DN14986_c0_g2	smo:SELMODRAFT_146320	49	8.3e-07	-	hypothetical protein	K13523	lysophosphatidic acid acyltransferase / lysophosphatidylinositol acyltransferase	EC:2.3.1.51 2.3.1.-	smo00564	Glycerophospholipid metabolism	Metabolism	Lipid metabolism
TRINITY_DN14988_c0_g1	pda:103712149	82	3.5e-17	-	60S ribosomal protein L39-like	K02924	large subunit ribosomal protein L39e	-	pda03010	Ribosome	Genetic Information Processing	Translation
TRINITY_DN14999_c0_g1	ccaj:109792484	69.7	7.2e-19	-	multiple organellar RNA editing factor 3	K09699	2-oxoisovalerate dehydrogenase E2 component (dihydrolipoyl transacylase)	EC:2.3.1.168	ccaj00640	Propanoate metabolism	Metabolism	Carbohydrate metabolism
TRINITY_DN14999_c0_g1	ccaj:109792484	69.7	7.2e-19	-	multiple organellar RNA editing factor 3	K09699	2-oxoisovalerate dehydrogenase E2 component (dihydrolipoyl transacylase)	EC:2.3.1.168	ccaj00280	Valine, leucine and isoleucine degradation	Metabolism	Amino acid metabolism
TRINITY_DN15010_c0_g1	smo:SELMODRAFT_271992	61.7	2.1e-28	-	hypothetical protein	K00025	malate dehydrogenase	EC:1.1.1.37	smo00020	Citrate cycle (TCA cycle)	Metabolism	Carbohydrate metabolism
TRINITY_DN15010_c0_g1	smo:SELMODRAFT_271992	61.7	2.1e-28	-	hypothetical protein	K00025	malate dehydrogenase	EC:1.1.1.37	smo00620	Pyruvate metabolism	Metabolism	Carbohydrate metabolism
TRINITY_DN15010_c0_g1	smo:SELMODRAFT_271992	61.7	2.1e-28	-	hypothetical protein	K00025	malate dehydrogenase	EC:1.1.1.37	smo00630	Glyoxylate and dicarboxylate metabolism	Metabolism	Carbohydrate metabolism
TRINITY_DN15010_c0_g1	smo:SELMODRAFT_271992	61.7	2.1e-28	-	hypothetical protein	K00025	malate dehydrogenase	EC:1.1.1.37	smo00710	Carbon fixation in photosynthetic organisms	Metabolism	Energy metabolism
TRINITY_DN15010_c0_g1	smo:SELMODRAFT_271992	61.7	2.1e-28	-	hypothetical protein	K00025	malate dehydrogenase	EC:1.1.1.37	smo00270	Cysteine and methionine metabolism	Metabolism	Amino acid metabolism
TRINITY_DN15038_c0_g1	vra:106754416	83.5	3.2e-26	-	two-component response regulator-like APRR7 isoform X1	K12129	pseudo-response regulator 7	-	vra04712	Circadian rhythm - plant	Organismal Systems	Environmental adaptation
TRINITY_DN1504_c0_g1	osa:4332852	100	6.3e-41	-	nuclear/nucleolar GTPase 2	K14537	nuclear GTP-binding protein	-	osa03008	Ribosome biogenesis in eukaryotes	Genetic Information Processing	Translation
TRINITY_DN15063_c0_g1	osa:4326915	100	5.2e-33	NA	NA	NA	NA	NA	NA	NA	NA	NA
TRINITY_DN15063_c0_g2	nnu:104589685	100	6.4e-38	NA	NA	NA	NA	NA	NA	NA	NA	NA
TRINITY_DN15063_c0_g3	obr:102707529	98.6	1.6e-32	NA	NA	NA	NA	NA	NA	NA	NA	NA
TRINITY_DN15079_c0_g1	gsl:Gasu_15830	47.9	5.6e-14	NA	NA	NA	NA	NA	NA	NA	NA	NA
TRINITY_DN15083_c0_g1	gmx:100813501	100	3e-44	NA	NA	NA	NA	NA	NA	NA	NA	NA
TRINITY_DN15089_c0_g1	smo:SELMODRAFT_61948	37.9	3.1e-18	NA	NA	NA	NA	NA	NA	NA	NA	NA
TRINITY_DN15091_c0_g1	ccp:CHC_T00003369001	50	1e-13	-	hypothetical protein	K10534	nitrate reductase (NAD(P)H)	EC:1.7.1.1 1.7.1.2 1.7.1.3	ccp00910	Nitrogen metabolism	Metabolism	Energy metabolism
TRINITY_DN15099_c0_g1	pper:18784392	94.5	3.2e-32	-	uncharacterized protein LOC18784392	K07342	protein transport protein SEC61 subunit gamma and related proteins	-	pper03060	Protein export	Genetic Information Processing	Folding, sorting and degradation
TRINITY_DN15099_c0_g1	pper:18784392	94.5	3.2e-32	-	uncharacterized protein LOC18784392	K07342	protein transport protein SEC61 subunit gamma and related proteins	-	pper04141	Protein processing in endoplasmic reticulum	Genetic Information Processing	Folding, sorting and degradation
TRINITY_DN15099_c0_g1	pper:18784392	94.5	3.2e-32	-	uncharacterized protein LOC18784392	K07342	protein transport protein SEC61 subunit gamma and related proteins	-	pper04145	Phagosome	Cellular Processes	Transport and catabolism
TRINITY_DN15105_c1_g1	ini:109188320	43.7	1.8e-13	-	heterogeneous nuclear ribonucleoprotein 1-like	K14411	RNA-binding protein Musashi	-	ini03015	mRNA surveillance pathway	Genetic Information Processing	Translation
TRINITY_DN15114_c0_g1	sind:105173720	73.2	2.9e-60	-	auxin-responsive protein SAUR50-like	K14488	SAUR family protein	-	sind04075	Plant hormone signal transduction	Environmental Information Processing	Signal transduction
TRINITY_DN15140_c0_g1	zma:103629642	60.7	3e-17	-	probable alpha-glucosidase Os06g0675700 isoform X1	K01187	alpha-glucosidase	EC:3.2.1.20	zma00052	Galactose metabolism	Metabolism	Carbohydrate metabolism
TRINITY_DN15140_c0_g1	zma:103629642	60.7	3e-17	-	probable alpha-glucosidase Os06g0675700 isoform X1	K01187	alpha-glucosidase	EC:3.2.1.20	zma00500	Starch and sucrose metabolism	Metabolism	Carbohydrate metabolism
TRINITY_DN15147_c0_g1	ccaj:109797497	79.4	2e-40	NA	NA	NA	NA	NA	NA	NA	NA	NA
TRINITY_DN15162_c0_g5	obr:102710647	55.7	7.7e-31	NA	NA	NA	NA	NA	NA	NA	NA	NA
TRINITY_DN15162_c0_g6	bdi:100846696	56.6	2e-18	NA	NA	NA	NA	NA	NA	NA	NA	NA
TRINITY_DN15162_c0_g7	ghi:107900094	40	1.4e-09	NA	NA	NA	NA	NA	NA	NA	NA	NA
TRINITY_DN15169_c0_g3	bna:106453939	46	2.8e-07	NA	NA	NA	NA	NA	NA	NA	NA	NA
TRINITY_DN15180_c0_g1	osa:4348610	98.8	1.8e-43	-	carbon catabolite repressor protein 4 homolog 1	K12603	CCR4-NOT transcription complex subunit 6	EC:3.1.13.4	osa03018	RNA degradation	Genetic Information Processing	Folding, sorting and degradation
TRINITY_DN15181_c0_g1	vvi:100264936	75.7	1.7e-40	-	replication protein A 14 kDa subunit B	K10740	replication factor A3	-	vvi03030	DNA replication	Genetic Information Processing	Replication and repair
TRINITY_DN15181_c0_g1	vvi:100264936	75.7	1.7e-40	-	replication protein A 14 kDa subunit B	K10740	replication factor A3	-	vvi03420	Nucleotide excision repair	Genetic Information Processing	Replication and repair
TRINITY_DN15181_c0_g1	vvi:100264936	75.7	1.7e-40	-	replication protein A 14 kDa subunit B	K10740	replication factor A3	-	vvi03430	Mismatch repair	Genetic Information Processing	Replication and repair
TRINITY_DN15181_c0_g1	vvi:100264936	75.7	1.7e-40	-	replication protein A 14 kDa subunit B	K10740	replication factor A3	-	vvi03440	Homologous recombination	Genetic Information Processing	Replication and repair
TRINITY_DN15188_c0_g1	han:110871140	67.4	7.8e-81	NA	NA	NA	NA	NA	NA	NA	NA	NA
TRINITY_DN15197_c0_g2	cit:102631051	37.3	1.1e-07	-	uncharacterized protein LOC102631051	K01951	GMP synthase (glutamine-hydrolysing)	EC:6.3.5.2	cit00230	Purine metabolism	Metabolism	Nucleotide metabolism
TRINITY_DN15208_c0_g1	cmo:103485315	28.6	4.6e-17	NA	NA	NA	NA	NA	NA	NA	NA	NA
TRINITY_DN15213_c0_g2	gmx:100499732	36.7	3.6e-26	NA	NA	NA	NA	NA	NA	NA	NA	NA
TRINITY_DN15223_c0_g1	ats:109738290	69.6	1.3e-26	LOC109738290	serine/arginine-rich-splicing factor SR34 isoform X1	K12890	splicing factor, arginine/serine-rich 1	-	ats03040	Spliceosome	Genetic Information Processing	Transcription
TRINITY_DN15224_c1_g1	smo:SELMODRAFT_77589	72.2	6e-35	-	hypothetical protein	K02976	small subunit ribosomal protein S26e	-	smo03010	Ribosome	Genetic Information Processing	Translation
TRINITY_DN15224_c1_g2	bna:106375009	72.3	2.6e-36	-	40S ribosomal protein S26-3	K02976	small subunit ribosomal protein S26e	-	bna03010	Ribosome	Genetic Information Processing	Translation
TRINITY_DN15224_c1_g3	bna:106375009	72.3	2.2e-36	-	40S ribosomal protein S26-3	K02976	small subunit ribosomal protein S26e	-	bna03010	Ribosome	Genetic Information Processing	Translation
TRINITY_DN1522_c0_g1	gmx:100781643	100	9.7e-35	-	bifunctional dTDP-4-dehydrorhamnose 3	K12451	3,5-epimerase/4-reductase	EC:5.1.3.- 1.1.1.-	gmx00520	Amino sugar and nucleotide sugar metabolism	Metabolism	Carbohydrate metabolism
TRINITY_DN1522_c0_g1	gmx:100781643	100	9.7e-35	-	bifunctional dTDP-4-dehydrorhamnose 3	K12451	3,5-epimerase/4-reductase	EC:5.1.3.- 1.1.1.-	gmx00523	Polyketide sugar unit biosynthesis	Metabolism	Metabolism of terpenoids and polyketides
TRINITY_DN15249_c0_g3	osa:4342690	100	1.4e-52	-	cycloartenol-C-24-methyltransferase 1	K00559	sterol 24-C-methyltransferase	EC:2.1.1.41	osa00100	Steroid biosynthesis	Metabolism	Lipid metabolism
TRINITY_DN15254_c0_g1	cvr:CHLNCDRAFT_142000	53.6	1.6e-08	-	hypothetical protein	K00799	glutathione S-transferase	EC:2.5.1.18	cvr00480	Glutathione metabolism	Metabolism	Metabolism of other amino acids
TRINITY_DN15260_c0_g1	bvg:104906049	52.4	1.2e-19	NA	NA	NA	NA	NA	NA	NA	NA	NA
TRINITY_DN15264_c0_g1	osa:4327483	100	1.8e-65	-	60S ribosomal protein L24	K02896	large subunit ribosomal protein L24e	-	osa03010	Ribosome	Genetic Information Processing	Translation
TRINITY_DN15269_c0_g1	gmx:100527042	80	1.6e-26	-	V-type proton ATPase subunit e2	K02153	V-type H+-transporting ATPase subunit e	-	gmx00190	Oxidative phosphorylation	Metabolism	Energy metabolism
TRINITY_DN15269_c0_g1	gmx:100527042	80	1.6e-26	-	V-type proton ATPase subunit e2	K02153	V-type H+-transporting ATPase subunit e	-	gmx04145	Phagosome	Cellular Processes	Transport and catabolism
TRINITY_DN15271_c0_g1	osa:4333064	100	4.2e-49	NA	NA	NA	NA	NA	NA	NA	NA	NA
TRINITY_DN15274_c0_g2	gsl:Gasu_37400	88.5	4.9e-31	-	translation initiation factor eIF-2 gamma subunit isoform 1	K03242	translation initiation factor 2 subunit 3	-	gsl03013	RNA transport	Genetic Information Processing	Translation
TRINITY_DN15274_c0_g3	bpg:Bathy05g04370	77.1	9.1e-32	-	translation initiation factor 2 gamma subunit	K03242	translation initiation factor 2 subunit 3	-	bpg03013	RNA transport	Genetic Information Processing	Translation
TRINITY_DN15285_c0_g1	cre:CHLREDRAFT_132716	76.3	2.2e-17	RPS30	ribosomal protein S30	K02983	small subunit ribosomal protein S30e	-	cre03010	Ribosome	Genetic Information Processing	Translation
TRINITY_DN15292_c0_g1	gmx:100795409	93.3	7.4e-16	NA	NA	NA	NA	NA	NA	NA	NA	NA
TRINITY_DN15300_c0_g3	adu:107459530	84.6	6.8e-22	-	histone-lysine N-methyltransferase ASHR3	K11423	histone-lysine N-methyltransferase SETD2	EC:2.1.1.43	adu00310	Lysine degradation	Metabolism	Amino acid metabolism
TRINITY_DN15323_c0_g1	csl:COCSUDRAFT_63003	65.2	3.7e-15	NA	NA	NA	NA	NA	NA	NA	NA	NA
TRINITY_DN15324_c1_g2	bdi:100835547	86.7	1.9e-07	NA	NA	NA	NA	NA	NA	NA	NA	NA
TRINITY_DN15334_c0_g1	jcu:105628084	96	1.1e-35	NA	NA	NA	NA	NA	NA	NA	NA	NA
TRINITY_DN15339_c0_g1	mcha:111009591	71.7	1.1e-16	-	60S ribosomal protein L29-1-like	K02905	large subunit ribosomal protein L29e	-	mcha03010	Ribosome	Genetic Information Processing	Translation
TRINITY_DN15339_c0_g2	mcha:111009591	71.7	4.8e-17	-	60S ribosomal protein L29-1-like	K02905	large subunit ribosomal protein L29e	-	mcha03010	Ribosome	Genetic Information Processing	Translation
TRINITY_DN15339_c0_g3	mcha:111009591	78.8	3e-15	-	60S ribosomal protein L29-1-like	K02905	large subunit ribosomal protein L29e	-	mcha03010	Ribosome	Genetic Information Processing	Translation
TRINITY_DN15339_c0_g4	lja:Lj4g3v2268740.1	67.2	1.1e-15	Lj4g3v2268740.1	-	K02905	large subunit ribosomal protein L29e	-	lja03010	Ribosome	Genetic Information Processing	Translation
TRINITY_DN15345_c0_g1	ini:109192729	64.8	3.5e-23	-	DNA-directed RNA polymerase I subunit 1-like	K02999	DNA-directed RNA polymerase I subunit RPA1	EC:2.7.7.6	ini00230	Purine metabolism	Metabolism	Nucleotide metabolism
TRINITY_DN15345_c0_g1	ini:109192729	64.8	3.5e-23	-	DNA-directed RNA polymerase I subunit 1-like	K02999	DNA-directed RNA polymerase I subunit RPA1	EC:2.7.7.6	ini00240	Pyrimidine metabolism	Metabolism	Nucleotide metabolism
TRINITY_DN15345_c0_g1	ini:109192729	64.8	3.5e-23	-	DNA-directed RNA polymerase I subunit 1-like	K02999	DNA-directed RNA polymerase I subunit RPA1	EC:2.7.7.6	ini03020	RNA polymerase	Genetic Information Processing	Transcription
TRINITY_DN15349_c0_g1	vvi:100255926	80.9	5.1e-51	NA	NA	NA	NA	NA	NA	NA	NA	NA
TRINITY_DN15350_c0_g1	tcc:18596109	66.2	2.1e-103	-	inorganic pyrophosphatase 2	K13248	pyridoxal phosphate phosphatase PHOSPHO2	EC:3.1.3.74	tcc00750	Vitamin B6 metabolism	Metabolism	Metabolism of cofactors and vitamins
TRINITY_DN15354_c0_g1	osa:4341707	71.6	4.9e-21	-	protein transport protein Sec61 subunit gamma-like	K07342	protein transport protein SEC61 subunit gamma and related proteins	-	osa03060	Protein export	Genetic Information Processing	Folding, sorting and degradation
TRINITY_DN15354_c0_g1	osa:4341707	71.6	4.9e-21	-	protein transport protein Sec61 subunit gamma-like	K07342	protein transport protein SEC61 subunit gamma and related proteins	-	osa04141	Protein processing in endoplasmic reticulum	Genetic Information Processing	Folding, sorting and degradation
TRINITY_DN15354_c0_g1	osa:4341707	71.6	4.9e-21	-	protein transport protein Sec61 subunit gamma-like	K07342	protein transport protein SEC61 subunit gamma and related proteins	-	osa04145	Phagosome	Cellular Processes	Transport and catabolism
TRINITY_DN15363_c0_g1	gmx:100814875	100	4.9e-11	-	eukaryotic translation initiation factor 5B-like	K03243	translation initiation factor 5B	-	gmx03013	RNA transport	Genetic Information Processing	Translation
TRINITY_DN15363_c0_g2	gmx:100814640	100	1.1e-36	-	eukaryotic translation initiation factor 5B-like	K03243	translation initiation factor 5B	-	gmx03013	RNA transport	Genetic Information Processing	Translation
TRINITY_DN15394_c0_g1	gmx:100820024	100	1.3e-31	-	eukaryotic initiation factor 4A-15	K03257	translation initiation factor 4A	-	gmx03013	RNA transport	Genetic Information Processing	Translation
TRINITY_DN15396_c0_g1	vcn:VOLCADRAFT_106866	51.9	1.2e-12	NA	NA	NA	NA	NA	NA	NA	NA	NA
TRINITY_DN15398_c0_g1	ghi:107963434	43.8	1.6e-17	NA	NA	NA	NA	NA	NA	NA	NA	NA
TRINITY_DN15399_c0_g1	bna:106384332	57.3	1.1e-48	NA	NA	NA	NA	NA	NA	NA	NA	NA
TRINITY_DN15409_c0_g1	osa:4348524	100	1.4e-33	-	alanine aminotransferase 2	K00814	alanine transaminase	EC:2.6.1.2	osa00710	Carbon fixation in photosynthetic organisms	Metabolism	Energy metabolism
TRINITY_DN15409_c0_g1	osa:4348524	100	1.4e-33	-	alanine aminotransferase 2	K00814	alanine transaminase	EC:2.6.1.2	osa00250	Alanine, aspartate and glutamate metabolism	Metabolism	Amino acid metabolism
TRINITY_DN15409_c0_g1	osa:4348524	100	1.4e-33	-	alanine aminotransferase 2	K00814	alanine transaminase	EC:2.6.1.2	osa00220	Arginine biosynthesis	Metabolism	Amino acid metabolism
TRINITY_DN15426_c0_g1	gmx:100810683	100	1.8e-39	NA	NA	NA	NA	NA	NA	NA	NA	NA
TRINITY_DN15429_c0_g1	gsl:Gasu_29450	75	1.6e-31	-	RNA-binding protein	K14396	polyadenylate-binding protein 2	-	gsl03015	mRNA surveillance pathway	Genetic Information Processing	Translation
TRINITY_DN15446_c0_g1	smo:SELMODRAFT_146841	67.7	5.7e-17	-	hypothetical protein	K14565	nucleolar protein 58	-	smo03008	Ribosome biogenesis in eukaryotes	Genetic Information Processing	Translation
TRINITY_DN15449_c0_g2	mdm:103442354	73.4	4.4e-31	NA	NA	NA	NA	NA	NA	NA	NA	NA
TRINITY_DN15458_c0_g2	brp:103827721	60.8	1.1e-21	-	AP-2 complex subunit mu-like	K11826	AP-2 complex subunit mu-1	-	brp04144	Endocytosis	Cellular Processes	Transport and catabolism
TRINITY_DN15484_c0_g1	thj:104801429	68.9	1.5e-24	-	SUMO-conjugating enzyme SCE1-like	K10577	ubiquitin-conjugating enzyme E2 I	-	thj03013	RNA transport	Genetic Information Processing	Translation
TRINITY_DN15484_c0_g1	thj:104801429	68.9	1.5e-24	-	SUMO-conjugating enzyme SCE1-like	K10577	ubiquitin-conjugating enzyme E2 I	-	thj04120	Ubiquitin mediated proteolysis	Genetic Information Processing	Folding, sorting and degradation
TRINITY_DN15485_c0_g1	lang:109343484	69.2	5e-87	NA	NA	NA	NA	NA	NA	NA	NA	NA
TRINITY_DN15486_c0_g2	gsl:Gasu_30090	72.9	1.2e-21	NA	NA	NA	NA	NA	NA	NA	NA	NA
TRINITY_DN15490_c0_g1	gmx:100818199	100	7e-43	-	cytochrome P450 94A1-like	K13407	fatty acid omega-hydroxylase	EC:1.14.-.-	gmx00073	Cutin, suberine and wax biosynthesis	Metabolism	Lipid metabolism
TRINITY_DN15491_c1_g1	osa:4351698	100	8.2e-41	-	GDP-L-galactose phosphorylase 2	K14190	GDP-L-galactose phosphorylase	EC:2.7.7.69	osa00053	Ascorbate and aldarate metabolism	Metabolism	Carbohydrate metabolism
TRINITY_DN15501_c0_g2	gmx:100499664	100	7.3e-34	-	uncharacterized LOC100499664	K02735	20S proteasome subunit beta 3	EC:3.4.25.1	gmx03050	Proteasome	Genetic Information Processing	Folding, sorting and degradation
TRINITY_DN15526_c0_g1	gmx:100779148	100	1.1e-59	-	60S ribosomal protein L34	K02915	large subunit ribosomal protein L34e	-	gmx03010	Ribosome	Genetic Information Processing	Translation
TRINITY_DN15533_c0_g2	ini:109166347	35.7	6e-08	NA	NA	NA	NA	NA	NA	NA	NA	NA
TRINITY_DN15543_c0_g5	cvr:CHLNCDRAFT_20835	41.9	3.1e-14	NA	NA	NA	NA	NA	NA	NA	NA	NA
TRINITY_DN15548_c0_g1	zma:103654171	98.1	1.3e-23	-	60S ribosomal protein L39-like	K02924	large subunit ribosomal protein L39e	-	zma03010	Ribosome	Genetic Information Processing	Translation
TRINITY_DN15549_c0_g1	cme:CYME_CMS428C	67.1	7.8e-65	NA	NA	NA	NA	NA	NA	NA	NA	NA
TRINITY_DN15549_c0_g2	gsl:Gasu_50880	78	1.4e-30	NA	NA	NA	NA	NA	NA	NA	NA	NA
TRINITY_DN15556_c0_g1	tcc:18605936	82.4	3e-83	-	50S ribosomal protein L11	K02867	large subunit ribosomal protein L11	-	tcc03010	Ribosome	Genetic Information Processing	Translation
TRINITY_DN15566_c0_g3	vvi:100250810	77.8	4.5e-35	-	uncharacterized LOC100250810	K02919	large subunit ribosomal protein L36	-	vvi03010	Ribosome	Genetic Information Processing	Translation
TRINITY_DN15576_c0_g2	mng:MNEG_4055	38.2	3.3e-10	-	Stromal heat shock-related protein	K03283	heat shock 70kDa protein 1/2/6/8	-	mng03040	Spliceosome	Genetic Information Processing	Transcription
TRINITY_DN15576_c0_g2	mng:MNEG_4055	38.2	3.3e-10	-	Stromal heat shock-related protein	K03283	heat shock 70kDa protein 1/2/6/8	-	mng04141	Protein processing in endoplasmic reticulum	Genetic Information Processing	Folding, sorting and degradation
TRINITY_DN15576_c0_g2	mng:MNEG_4055	38.2	3.3e-10	-	Stromal heat shock-related protein	K03283	heat shock 70kDa protein 1/2/6/8	-	mng04144	Endocytosis	Cellular Processes	Transport and catabolism
TRINITY_DN15577_c0_g1	osa:4328000	100	2.2e-34	-	ferredoxin--NADP reductase	K02641	ferredoxin--NADP+ reductase	EC:1.18.1.2	osa00195	Photosynthesis	Metabolism	Energy metabolism
TRINITY_DN15586_c0_g1	gmx:100778218	100	1.1e-40	-	dihydrolipoyllysine-residue acetyltransferase component 2 of pyruvate dehydrogenase complex	K00627	pyruvate dehydrogenase E2 component (dihydrolipoamide acetyltransferase)	EC:2.3.1.12	gmx00010	Glycolysis / Gluconeogenesis	Metabolism	Carbohydrate metabolism
TRINITY_DN15586_c0_g1	gmx:100778218	100	1.1e-40	-	dihydrolipoyllysine-residue acetyltransferase component 2 of pyruvate dehydrogenase complex	K00627	pyruvate dehydrogenase E2 component (dihydrolipoamide acetyltransferase)	EC:2.3.1.12	gmx00020	Citrate cycle (TCA cycle)	Metabolism	Carbohydrate metabolism
TRINITY_DN15586_c0_g1	gmx:100778218	100	1.1e-40	-	dihydrolipoyllysine-residue acetyltransferase component 2 of pyruvate dehydrogenase complex	K00627	pyruvate dehydrogenase E2 component (dihydrolipoamide acetyltransferase)	EC:2.3.1.12	gmx00620	Pyruvate metabolism	Metabolism	Carbohydrate metabolism
TRINITY_DN15586_c0_g3	gmx:100778218	100	2.3e-36	-	dihydrolipoyllysine-residue acetyltransferase component 2 of pyruvate dehydrogenase complex	K00627	pyruvate dehydrogenase E2 component (dihydrolipoamide acetyltransferase)	EC:2.3.1.12	gmx00010	Glycolysis / Gluconeogenesis	Metabolism	Carbohydrate metabolism
TRINITY_DN15586_c0_g3	gmx:100778218	100	2.3e-36	-	dihydrolipoyllysine-residue acetyltransferase component 2 of pyruvate dehydrogenase complex	K00627	pyruvate dehydrogenase E2 component (dihydrolipoamide acetyltransferase)	EC:2.3.1.12	gmx00020	Citrate cycle (TCA cycle)	Metabolism	Carbohydrate metabolism
TRINITY_DN15586_c0_g3	gmx:100778218	100	2.3e-36	-	dihydrolipoyllysine-residue acetyltransferase component 2 of pyruvate dehydrogenase complex	K00627	pyruvate dehydrogenase E2 component (dihydrolipoamide acetyltransferase)	EC:2.3.1.12	gmx00620	Pyruvate metabolism	Metabolism	Carbohydrate metabolism
TRINITY_DN15599_c1_g1	sind:105158379	39.3	9.9e-08	NA	NA	NA	NA	NA	NA	NA	NA	NA
TRINITY_DN15605_c0_g1	dosa:Os03t0237000-01	100	9.1e-34	NA	NA	NA	NA	NA	NA	NA	NA	NA
TRINITY_DN15606_c0_g1	ccp:CHC_T00009179001	72.1	9.1e-22	-	phosphoglycerate kinase	K00927	phosphoglycerate kinase	EC:2.7.2.3	ccp00010	Glycolysis / Gluconeogenesis	Metabolism	Carbohydrate metabolism
TRINITY_DN15606_c0_g1	ccp:CHC_T00009179001	72.1	9.1e-22	-	phosphoglycerate kinase	K00927	phosphoglycerate kinase	EC:2.7.2.3	ccp00710	Carbon fixation in photosynthetic organisms	Metabolism	Energy metabolism
TRINITY_DN15610_c0_g2	gsl:Gasu_15770	61.8	2.9e-32	-	6-phosphogluconate dehydrogenase	K00033	6-phosphogluconate dehydrogenase	EC:1.1.1.44 1.1.1.343	gsl00030	Pentose phosphate pathway	Metabolism	Carbohydrate metabolism
TRINITY_DN15610_c0_g2	gsl:Gasu_15770	61.8	2.9e-32	-	6-phosphogluconate dehydrogenase	K00033	6-phosphogluconate dehydrogenase	EC:1.1.1.44 1.1.1.343	gsl00480	Glutathione metabolism	Metabolism	Metabolism of other amino acids
TRINITY_DN15612_c0_g1	pvu:PHAVU_001G012800g	39.1	3.4e-58	-	hypothetical protein	K13082	bifunctional dihydroflavonol 4-reductase/flavanone 4-reductase	EC:1.1.1.219 1.1.1.234	pvu00941	Flavonoid biosynthesis	Metabolism	Biosynthesis of other secondary metabolites
TRINITY_DN15620_c0_g1	gmx:100814262	100	1.3e-37	NA	NA	NA	NA	NA	NA	NA	NA	NA
TRINITY_DN15629_c0_g1	gmx:100815780	100	4.9e-44	NA	NA	NA	NA	NA	NA	NA	NA	NA
TRINITY_DN15636_c1_g2	mis:MICPUN_56571	40.3	8.3e-24	NA	NA	NA	NA	NA	NA	NA	NA	NA
TRINITY_DN15639_c0_g1	ccp:CHC_T00004192001	53.9	2.5e-18	-	hypothetical protein	K02942	large subunit ribosomal protein LP1	-	ccp03010	Ribosome	Genetic Information Processing	Translation
TRINITY_DN15639_c0_g2	cre:CHLREDRAFT_195600	61.2	6.4e-15	RPP2	acidic ribosomal protein P2	K02943	large subunit ribosomal protein LP2	-	cre03010	Ribosome	Genetic Information Processing	Translation
TRINITY_DN15639_c0_g3	smo:SELMODRAFT_28094	60.9	3.1e-15	-	hypothetical protein	K02943	large subunit ribosomal protein LP2	-	smo03010	Ribosome	Genetic Information Processing	Translation
TRINITY_DN15644_c0_g2	mpp:MICPUCDRAFT_17183	52.2	1e-12	-	hypothetical protein	K02732	20S proteasome subunit beta 6	EC:3.4.25.1	mpp03050	Proteasome	Genetic Information Processing	Folding, sorting and degradation
TRINITY_DN15659_c0_g1	cme:CYME_CMK028C	65.2	5.1e-20	-	eukaryotic translation initiation factor eIF-4A	K03257	translation initiation factor 4A	-	cme03013	RNA transport	Genetic Information Processing	Translation
TRINITY_DN15659_c0_g2	mis:MICPUN_106753	89	4.4e-30	-	hypothetical protein	K03257	translation initiation factor 4A	-	mis03013	RNA transport	Genetic Information Processing	Translation
TRINITY_DN15659_c0_g3	smo:SELMODRAFT_85554	76.4	1e-40	-	hypothetical protein	K03257	translation initiation factor 4A	-	smo03013	RNA transport	Genetic Information Processing	Translation
TRINITY_DN15661_c0_g1	gmx:100500630	100	1.8e-17	NA	NA	NA	NA	NA	NA	NA	NA	NA
TRINITY_DN15681_c0_g1	csl:COCSUDRAFT_16994	72.4	1.2e-25	-	nucleolar GTP-binding protein	K06943	nucleolar GTP-binding protein	-	csl03008	Ribosome biogenesis in eukaryotes	Genetic Information Processing	Translation
TRINITY_DN15682_c0_g1	pavi:110748528	59.2	4e-24	-	mitogen-activated protein kinase kinase 10	K20604	mitogen-activated protein kinase kinase 9	EC:2.7.12.2	pavi04016	MAPK signaling pathway - plant	Environmental Information Processing	Signal transduction
TRINITY_DN15688_c0_g1	gmx:100305587	98.5	8.9e-70	-	uncharacterized LOC100305587	K02966	small subunit ribosomal protein S19e	-	gmx03010	Ribosome	Genetic Information Processing	Translation
TRINITY_DN15695_c0_g1	gmx:100796900	100	8.2e-34	-	pre-mRNA-splicing factor SF2-like	K12890	splicing factor, arginine/serine-rich 1	-	gmx03040	Spliceosome	Genetic Information Processing	Transcription
TRINITY_DN15696_c1_g1	han:110911596	63.9	5.8e-30	-	40S ribosomal protein S3-1-like	K02985	small subunit ribosomal protein S3e	-	han03010	Ribosome	Genetic Information Processing	Translation
TRINITY_DN15696_c1_g2	mpp:MICPUCDRAFT_26239	91.1	1.4e-67	-	hypothetical protein	K02985	small subunit ribosomal protein S3e	-	mpp03010	Ribosome	Genetic Information Processing	Translation
TRINITY_DN1570_c0_g1	mcha:111011944	42.2	3.8e-32	-	glucan endo-1	K19891	glucan endo-1,3-beta-glucosidase 1/2/3	EC:3.2.1.39	mcha00500	Starch and sucrose metabolism	Metabolism	Carbohydrate metabolism
TRINITY_DN1570_c0_g2	smo:SELMODRAFT_443280	34.2	2.8e-13	-	hypothetical protein	K19891	glucan endo-1,3-beta-glucosidase 1/2/3	EC:3.2.1.39	smo00500	Starch and sucrose metabolism	Metabolism	Carbohydrate metabolism
TRINITY_DN15715_c0_g1	smo:SELMODRAFT_143457	44.4	1.3e-07	NA	NA	NA	NA	NA	NA	NA	NA	NA
TRINITY_DN15721_c0_g1	han:110879960	79.5	2.3e-32	NA	NA	NA	NA	NA	NA	NA	NA	NA
TRINITY_DN15723_c0_g1	sly:101245249	59.7	9.3e-20	-	40S ribosomal protein S21-like	K02971	small subunit ribosomal protein S21e	-	sly03010	Ribosome	Genetic Information Processing	Translation
TRINITY_DN15747_c0_g2	gmx:100806661	100	2.3e-37	-	probable UDP-N-acetylglucosamine--peptide N-acetylglucosaminyltransferase SEC	K09667	protein O-GlcNAc transferase	EC:2.4.1.255	gmx00514	Other types of O-glycan biosynthesis	Metabolism	Glycan biosynthesis and metabolism
TRINITY_DN15755_c1_g7	gmx:100799731	100	5e-34	-	cyanogenic beta-glucosidase-like	K01188	beta-glucosidase	EC:3.2.1.21	gmx00500	Starch and sucrose metabolism	Metabolism	Carbohydrate metabolism
TRINITY_DN15755_c1_g7	gmx:100799731	100	5e-34	-	cyanogenic beta-glucosidase-like	K01188	beta-glucosidase	EC:3.2.1.21	gmx00460	Cyanoamino acid metabolism	Metabolism	Metabolism of other amino acids
TRINITY_DN15755_c1_g7	gmx:100799731	100	5e-34	-	cyanogenic beta-glucosidase-like	K01188	beta-glucosidase	EC:3.2.1.21	gmx00940	Phenylpropanoid biosynthesis	Metabolism	Biosynthesis of other secondary metabolites
TRINITY_DN15762_c0_g1	gmx:100794246	100	4.1e-31	NA	NA	NA	NA	NA	NA	NA	NA	NA
TRINITY_DN15762_c1_g1	gmx:100794246	100	2e-32	NA	NA	NA	NA	NA	NA	NA	NA	NA
TRINITY_DN15763_c0_g1	gmx:100801539	100	1.3e-57	-	60S ribosomal protein L35	K02918	large subunit ribosomal protein L35e	-	gmx03010	Ribosome	Genetic Information Processing	Translation
TRINITY_DN15769_c0_g1	gmx:100787863	98.5	7.8e-29	NA	NA	NA	NA	NA	NA	NA	NA	NA
TRINITY_DN15775_c0_g1	hbr:110673724	65.5	3.9e-28	-	glycine-rich RNA-binding protein RZ1A	K12885	heterogeneous nuclear ribonucleoprotein G	-	hbr03040	Spliceosome	Genetic Information Processing	Transcription
TRINITY_DN1577_c0_g1	osa:4334968	100	1.4e-11	-	pyruvate dehydrogenase E1 component subunit alpha-3	K00161	pyruvate dehydrogenase E1 component alpha subunit	EC:1.2.4.1	osa00010	Glycolysis / Gluconeogenesis	Metabolism	Carbohydrate metabolism
TRINITY_DN1577_c0_g1	osa:4334968	100	1.4e-11	-	pyruvate dehydrogenase E1 component subunit alpha-3	K00161	pyruvate dehydrogenase E1 component alpha subunit	EC:1.2.4.1	osa00020	Citrate cycle (TCA cycle)	Metabolism	Carbohydrate metabolism
TRINITY_DN1577_c0_g1	osa:4334968	100	1.4e-11	-	pyruvate dehydrogenase E1 component subunit alpha-3	K00161	pyruvate dehydrogenase E1 component alpha subunit	EC:1.2.4.1	osa00620	Pyruvate metabolism	Metabolism	Carbohydrate metabolism
TRINITY_DN15788_c0_g2	gra:105783454	68.4	2.1e-14	NA	NA	NA	NA	NA	NA	NA	NA	NA
TRINITY_DN15801_c0_g3	gmx:100305632	100	1.4e-33	-	uncharacterized LOC100305632	K07953	GTP-binding protein SAR1	EC:3.6.5.-	gmx04141	Protein processing in endoplasmic reticulum	Genetic Information Processing	Folding, sorting and degradation
TRINITY_DN15804_c0_g1	sly:101246598	68.2	3.2e-98	NA	NA	NA	NA	NA	NA	NA	NA	NA
TRINITY_DN1581_c0_g1	cpap:110812388	38.5	2.4e-12	-	26S proteasome non-ATPase regulatory subunit 8 homolog A	K03031	26S proteasome regulatory subunit N12	-	cpap03050	Proteasome	Genetic Information Processing	Folding, sorting and degradation
TRINITY_DN15821_c0_g1	gmx:100791083	100	2.3e-34	-	protein transport protein Sec24-like At3g07100	K14007	protein transport protein SEC24	-	gmx04141	Protein processing in endoplasmic reticulum	Genetic Information Processing	Folding, sorting and degradation
TRINITY_DN15826_c0_g1	mis:MICPUN_99967	33.2	1.1e-14	NA	NA	NA	NA	NA	NA	NA	NA	NA
TRINITY_DN15838_c0_g2	csv:101208440	76.3	6.7e-18	-	vacuolar protein sorting-associated protein 2 homolog 2	K12191	charged multivesicular body protein 2A	-	csv04144	Endocytosis	Cellular Processes	Transport and catabolism
TRINITY_DN15839_c0_g1	aly:ARALYDRAFT_343234	58	1.4e-08	NA	NA	NA	NA	NA	NA	NA	NA	NA
TRINITY_DN15843_c0_g1	gra:105765538	54.4	8.8e-22	NA	NA	NA	NA	NA	NA	NA	NA	NA
TRINITY_DN15847_c0_g2	nto:104117803	34.2	7.6e-11	NA	NA	NA	NA	NA	NA	NA	NA	NA
TRINITY_DN15864_c0_g1	smo:SELMODRAFT_443317	30	3.1e-07	NA	NA	NA	NA	NA	NA	NA	NA	NA
TRINITY_DN15869_c0_g1	nta:107811391	55.9	1.9e-186	-	protein EDS1L-like	K18875	enhanced disease susceptibility 1 protein	-	nta04626	Plant-pathogen interaction	Organismal Systems	Environmental adaptation
TRINITY_DN15878_c0_g2	nnu:104610137	64.1	1.2e-08	NA	NA	NA	NA	NA	NA	NA	NA	NA
TRINITY_DN15880_c0_g1	vvi:100248046	77.8	1.4e-166	-	DNA-directed RNA polymerases I and III subunit RPAC1	K03027	DNA-directed RNA polymerases I and III subunit RPAC1	-	vvi00230	Purine metabolism	Metabolism	Nucleotide metabolism
TRINITY_DN15880_c0_g1	vvi:100248046	77.8	1.4e-166	-	DNA-directed RNA polymerases I and III subunit RPAC1	K03027	DNA-directed RNA polymerases I and III subunit RPAC1	-	vvi00240	Pyrimidine metabolism	Metabolism	Nucleotide metabolism
TRINITY_DN15880_c0_g1	vvi:100248046	77.8	1.4e-166	-	DNA-directed RNA polymerases I and III subunit RPAC1	K03027	DNA-directed RNA polymerases I and III subunit RPAC1	-	vvi03020	RNA polymerase	Genetic Information Processing	Transcription
TRINITY_DN15883_c0_g1	obr:102704611	65.5	2.6e-12	-	isocitrate dehydrogenase [NADP]-like	K00031	isocitrate dehydrogenase	EC:1.1.1.42	obr00020	Citrate cycle (TCA cycle)	Metabolism	Carbohydrate metabolism
TRINITY_DN15883_c0_g1	obr:102704611	65.5	2.6e-12	-	isocitrate dehydrogenase [NADP]-like	K00031	isocitrate dehydrogenase	EC:1.1.1.42	obr00480	Glutathione metabolism	Metabolism	Metabolism of other amino acids
TRINITY_DN15883_c0_g1	obr:102704611	65.5	2.6e-12	-	isocitrate dehydrogenase [NADP]-like	K00031	isocitrate dehydrogenase	EC:1.1.1.42	obr04146	Peroxisome	Cellular Processes	Transport and catabolism
TRINITY_DN15892_c0_g1	nta:107770528	54.5	1.3e-39	rac3	rac-like GTP-binding protein RAC2	K04392	Ras-related C3 botulinum toxin substrate 1	-	nta04145	Phagosome	Cellular Processes	Transport and catabolism
TRINITY_DN15892_c0_g1	nta:107770528	54.5	1.3e-39	rac3	rac-like GTP-binding protein RAC2	K04392	Ras-related C3 botulinum toxin substrate 1	-	nta04933	AGE-RAGE signaling pathway in diabetic complications	Human Diseases	Endocrine and metabolic diseases
TRINITY_DN15895_c0_g1	gmx:100776030	100	9.5e-98	NA	NA	NA	NA	NA	NA	NA	NA	NA
TRINITY_DN15897_c0_g1	ini:109182000	44.7	3e-31	NA	NA	NA	NA	NA	NA	NA	NA	NA
TRINITY_DN15899_c0_g1	han:110889631	77.3	9e-175	NA	NA	NA	NA	NA	NA	NA	NA	NA
TRINITY_DN15904_c0_g1	han:110904497	44	9.7e-13	NA	NA	NA	NA	NA	NA	NA	NA	NA
TRINITY_DN15907_c0_g1	thj:104804157	46.2	1.1e-18	NA	NA	NA	NA	NA	NA	NA	NA	NA
TRINITY_DN15912_c0_g1	nnu:104600626	45.9	1.4e-16	-	midasin	K14572	midasin	-	nnu03008	Ribosome biogenesis in eukaryotes	Genetic Information Processing	Translation
TRINITY_DN15913_c0_g1	ini:109183374	86.8	1.9e-39	NA	NA	NA	NA	NA	NA	NA	NA	NA
TRINITY_DN15914_c0_g1	gmx:100819739	98.6	4.1e-28	NA	NA	NA	NA	NA	NA	NA	NA	NA
TRINITY_DN15915_c0_g1	zju:107411570	48.8	4.8e-17	-	26S protease regulatory subunit 6B homolog	K03063	26S proteasome regulatory subunit T3	-	zju03050	Proteasome	Genetic Information Processing	Folding, sorting and degradation
TRINITY_DN15916_c0_g1	vvi:100251697	75.8	8.2e-78	-	50S ribosomal protein L9	K02939	large subunit ribosomal protein L9	-	vvi03010	Ribosome	Genetic Information Processing	Translation
TRINITY_DN15924_c0_g1	hbr:110650378	76	4.2e-33	NA	NA	NA	NA	NA	NA	NA	NA	NA
TRINITY_DN15929_c0_g1	gsl:Gasu_21170	31.6	6e-10	NA	NA	NA	NA	NA	NA	NA	NA	NA
TRINITY_DN15942_c0_g1	sind:105173013	78.8	1.6e-137	-	heterodimeric geranylgeranyl pyrophosphate synthase small subunit	K13789	geranylgeranyl diphosphate synthase, type II	EC:2.5.1.1 2.5.1.10 2.5.1.29	sind00900	Terpenoid backbone biosynthesis	Metabolism	Metabolism of terpenoids and polyketides
TRINITY_DN15955_c0_g3	adu:107483935	61.2	5.9e-28	-	uncharacterized protein LOC107483935	K02130	F-type H+-transporting ATPase subunit f	-	adu00190	Oxidative phosphorylation	Metabolism	Energy metabolism
TRINITY_DN15958_c0_g1	han:110889140	78.8	2.1e-30	NA	NA	NA	NA	NA	NA	NA	NA	NA
TRINITY_DN15959_c0_g2	obr:102713089	46.4	1.1e-09	NA	NA	NA	NA	NA	NA	NA	NA	NA
TRINITY_DN15970_c0_g1	vvi:100852686	90.3	2.7e-73	-	abscisic acid receptor PYL8	K14496	abscisic acid receptor PYR/PYL family	-	vvi04016	MAPK signaling pathway - plant	Environmental Information Processing	Signal transduction
TRINITY_DN15970_c0_g1	vvi:100852686	90.3	2.7e-73	-	abscisic acid receptor PYL8	K14496	abscisic acid receptor PYR/PYL family	-	vvi04075	Plant hormone signal transduction	Environmental Information Processing	Signal transduction
TRINITY_DN15987_c0_g1	brp:103852850	48	1.5e-17	NA	NA	NA	NA	NA	NA	NA	NA	NA
TRINITY_DN15992_c0_g1	bvg:104899988	42.4	6.6e-31	-	eukaryotic translation initiation factor 3 subunit F	K03249	translation initiation factor 3 subunit F	-	bvg03013	RNA transport	Genetic Information Processing	Translation
TRINITY_DN1599_c0_g1	nta:107778140	48.8	4.1e-12	-	phosphatidylinositol 4-phosphate 5-kinase 6-like	K00889	1-phosphatidylinositol-4-phosphate 5-kinase	EC:2.7.1.68	nta00562	Inositol phosphate metabolism	Metabolism	Carbohydrate metabolism
TRINITY_DN1599_c0_g1	nta:107778140	48.8	4.1e-12	-	phosphatidylinositol 4-phosphate 5-kinase 6-like	K00889	1-phosphatidylinositol-4-phosphate 5-kinase	EC:2.7.1.68	nta04070	Phosphatidylinositol signaling system	Environmental Information Processing	Signal transduction
TRINITY_DN1599_c0_g1	nta:107778140	48.8	4.1e-12	-	phosphatidylinositol 4-phosphate 5-kinase 6-like	K00889	1-phosphatidylinositol-4-phosphate 5-kinase	EC:2.7.1.68	nta04144	Endocytosis	Cellular Processes	Transport and catabolism
TRINITY_DN15_c0_g1	osa:4346851	100	8.6e-27	NA	NA	NA	NA	NA	NA	NA	NA	NA
TRINITY_DN16006_c0_g3	pda:103716421	37	2.8e-06	NA	NA	NA	NA	NA	NA	NA	NA	NA
TRINITY_DN16012_c0_g1	mis:MICPUN_104969	72.1	1.1e-19	PHO1	glycosyltransferase family 35 protein	K00688	glycogen phosphorylase	EC:2.4.1.1	mis00500	Starch and sucrose metabolism	Metabolism	Carbohydrate metabolism
TRINITY_DN16012_c0_g2	csl:COCSUDRAFT_52379	49.2	1.1e-11	-	starch phosphorylase	K00688	glycogen phosphorylase	EC:2.4.1.1	csl00500	Starch and sucrose metabolism	Metabolism	Carbohydrate metabolism
TRINITY_DN16017_c0_g1	fve:101295234	52.3	9.5e-12	-	nitrate reductase [NADH]-like	K10534	nitrate reductase (NAD(P)H)	EC:1.7.1.1 1.7.1.2 1.7.1.3	fve00910	Nitrogen metabolism	Metabolism	Energy metabolism
TRINITY_DN16020_c1_g1	ota:OstapMp36	33.6	4.1e-75	nad5	nad5	K03883	NADH-ubiquinone oxidoreductase chain 5	EC:1.6.5.3	ota00190	Oxidative phosphorylation	Metabolism	Energy metabolism
TRINITY_DN16022_c0_g1	nta:107822799	82.9	8e-94	-	peroxidase 17-like	K00430	peroxidase	EC:1.11.1.7	nta00940	Phenylpropanoid biosynthesis	Metabolism	Biosynthesis of other secondary metabolites
TRINITY_DN16023_c0_g1	sind:105175682	69.9	1.2e-37	-	DNA-directed RNA polymerases I and III subunit RPAC2	K03020	DNA-directed RNA polymerases I and III subunit RPAC2	-	sind00230	Purine metabolism	Metabolism	Nucleotide metabolism
TRINITY_DN16023_c0_g1	sind:105175682	69.9	1.2e-37	-	DNA-directed RNA polymerases I and III subunit RPAC2	K03020	DNA-directed RNA polymerases I and III subunit RPAC2	-	sind00240	Pyrimidine metabolism	Metabolism	Nucleotide metabolism
TRINITY_DN16023_c0_g1	sind:105175682	69.9	1.2e-37	-	DNA-directed RNA polymerases I and III subunit RPAC2	K03020	DNA-directed RNA polymerases I and III subunit RPAC2	-	sind03020	RNA polymerase	Genetic Information Processing	Transcription
TRINITY_DN16024_c0_g3	lja:Lj0g3v0059869.1	47	5.6e-90	NA	NA	NA	NA	NA	NA	NA	NA	NA
TRINITY_DN16032_c0_g1	nta:107789107	73	2.2e-52	-	15.4 kDa class V heat shock protein-like	K13993	HSP20 family protein	-	nta04141	Protein processing in endoplasmic reticulum	Genetic Information Processing	Folding, sorting and degradation
TRINITY_DN16036_c0_g1	gmx:100810108	100	1.1e-27	-	60S ribosomal protein L29-1	K02905	large subunit ribosomal protein L29e	-	gmx03010	Ribosome	Genetic Information Processing	Translation
TRINITY_DN16042_c0_g1	nnu:104602102	71.2	2.9e-18	NA	NA	NA	NA	NA	NA	NA	NA	NA
TRINITY_DN16042_c0_g2	nnu:104602102	48.9	1.3e-31	NA	NA	NA	NA	NA	NA	NA	NA	NA
TRINITY_DN16047_c0_g1	pvu:PHAVU_002G047500g	53.6	1.6e-11	-	hypothetical protein	K13258	2-hydroxyisoflavanone dehydratase	EC:4.2.1.105	pvu00943	Isoflavonoid biosynthesis	Metabolism	Biosynthesis of other secondary metabolites
TRINITY_DN16047_c0_g2	mtr:MTR_5g005850	52.4	8.3e-80	-	2-hydroxyisoflavanone dehydratase	K13258	2-hydroxyisoflavanone dehydratase	EC:4.2.1.105	mtr00943	Isoflavonoid biosynthesis	Metabolism	Biosynthesis of other secondary metabolites
TRINITY_DN16050_c0_g1	csl:COCSUDRAFT_33822	80.2	6.1e-47	-	ribosomal protein S1	K02969	small subunit ribosomal protein S20e	-	csl03010	Ribosome	Genetic Information Processing	Translation
TRINITY_DN16050_c0_g2	mng:MNEG_0983	79.2	2.2e-40	-	40S ribosomal protein S20-1	K02969	small subunit ribosomal protein S20e	-	mng03010	Ribosome	Genetic Information Processing	Translation
TRINITY_DN16052_c0_g1	mdm:103435918	47.4	2.1e-09	NA	NA	NA	NA	NA	NA	NA	NA	NA
TRINITY_DN16076_c0_g2	gra:105780066	26.2	6.8e-16	NA	NA	NA	NA	NA	NA	NA	NA	NA
TRINITY_DN16078_c0_g1	osa:4327108	100	1.8e-12	NA	NA	NA	NA	NA	NA	NA	NA	NA
TRINITY_DN16078_c0_g2	osa:4327108	83.3	2e-09	NA	NA	NA	NA	NA	NA	NA	NA	NA
TRINITY_DN16085_c0_g1	csat:104723377	48.5	2e-35	-	isoleucine--tRNA ligase	K01870	isoleucyl-tRNA synthetase	EC:6.1.1.5	csat00970	Aminoacyl-tRNA biosynthesis	Genetic Information Processing	Translation
TRINITY_DN16090_c0_g1	nta:107828969	69.4	2.3e-38	-	DNA-directed RNA polymerases I and III subunit RPAC2-like	K03020	DNA-directed RNA polymerases I and III subunit RPAC2	-	nta00230	Purine metabolism	Metabolism	Nucleotide metabolism
TRINITY_DN16090_c0_g1	nta:107828969	69.4	2.3e-38	-	DNA-directed RNA polymerases I and III subunit RPAC2-like	K03020	DNA-directed RNA polymerases I and III subunit RPAC2	-	nta00240	Pyrimidine metabolism	Metabolism	Nucleotide metabolism
TRINITY_DN16090_c0_g1	nta:107828969	69.4	2.3e-38	-	DNA-directed RNA polymerases I and III subunit RPAC2-like	K03020	DNA-directed RNA polymerases I and III subunit RPAC2	-	nta03020	RNA polymerase	Genetic Information Processing	Transcription
TRINITY_DN16092_c0_g1	hbr:110657435	34.9	8.9e-16	NA	NA	NA	NA	NA	NA	NA	NA	NA
TRINITY_DN16094_c0_g1	ini:109159740	76.8	2.6e-44	-	60S ribosomal protein L30	K02908	large subunit ribosomal protein L30e	-	ini03010	Ribosome	Genetic Information Processing	Translation
TRINITY_DN16096_c0_g1	tcc:18598041	78.3	2.7e-58	NA	NA	NA	NA	NA	NA	NA	NA	NA
TRINITY_DN16109_c0_g1	fve:101302900	65.5	4.7e-76	-	flavonoid 3'	K00588	caffeoyl-CoA O-methyltransferase	EC:2.1.1.104	fve00360	Phenylalanine metabolism	Metabolism	Amino acid metabolism
TRINITY_DN16109_c0_g1	fve:101302900	65.5	4.7e-76	-	flavonoid 3'	K00588	caffeoyl-CoA O-methyltransferase	EC:2.1.1.104	fve00940	Phenylpropanoid biosynthesis	Metabolism	Biosynthesis of other secondary metabolites
TRINITY_DN16109_c0_g1	fve:101302900	65.5	4.7e-76	-	flavonoid 3'	K00588	caffeoyl-CoA O-methyltransferase	EC:2.1.1.104	fve00945	Stilbenoid, diarylheptanoid and gingerol biosynthesis	Metabolism	Biosynthesis of other secondary metabolites
TRINITY_DN16109_c0_g1	fve:101302900	65.5	4.7e-76	-	flavonoid 3'	K00588	caffeoyl-CoA O-methyltransferase	EC:2.1.1.104	fve00941	Flavonoid biosynthesis	Metabolism	Biosynthesis of other secondary metabolites
TRINITY_DN16110_c0_g1	gmx:100786832	100	9.4e-46	-	diaminopimelate decarboxylase 2	K01586	diaminopimelate decarboxylase	EC:4.1.1.20	gmx00300	Lysine biosynthesis	Metabolism	Amino acid metabolism
TRINITY_DN16117_c1_g1	egr:104422645	57.1	1.9e-16	-	eukaryotic translation initiation factor 3 subunit B	K03253	translation initiation factor 3 subunit B	-	egr03013	RNA transport	Genetic Information Processing	Translation
TRINITY_DN16121_c0_g1	pavi:110762209	39.5	1.9e-16	-	uncharacterized protein LOC110762209 isoform X1	K09648	mitochondrial inner membrane protease subunit 2	EC:3.4.21.-	pavi03060	Protein export	Genetic Information Processing	Folding, sorting and degradation
TRINITY_DN16122_c0_g1	gmx:100797664	100	3.2e-36	NA	NA	NA	NA	NA	NA	NA	NA	NA
TRINITY_DN16126_c0_g1	gmx:100809066	100	6.2e-31	-	putative DNA repair protein RAD23-3-like	K10839	UV excision repair protein RAD23	-	gmx04141	Protein processing in endoplasmic reticulum	Genetic Information Processing	Folding, sorting and degradation
TRINITY_DN16126_c0_g1	gmx:100809066	100	6.2e-31	-	putative DNA repair protein RAD23-3-like	K10839	UV excision repair protein RAD23	-	gmx03420	Nucleotide excision repair	Genetic Information Processing	Replication and repair
TRINITY_DN16142_c0_g1	gmx:100801722	100	1.5e-49	NA	NA	NA	NA	NA	NA	NA	NA	NA
TRINITY_DN16147_c0_g1	gmx:100785260	75.6	5.4e-19	NA	NA	NA	NA	NA	NA	NA	NA	NA
TRINITY_DN16149_c0_g1	mtr:MTR_7g055590	78.1	7.2e-07	-	transducin family protein/WD-40 repeat protein	K03363	cell division cycle 20, cofactor of APC complex	-	mtr04120	Ubiquitin mediated proteolysis	Genetic Information Processing	Folding, sorting and degradation
TRINITY_DN16154_c0_g1	pper:18793484	76.7	4e-89	-	probable 3-beta-hydroxysteroid-Delta(8)	K01824	cholestenol Delta-isomerase	EC:5.3.3.5	pper00100	Steroid biosynthesis	Metabolism	Lipid metabolism
TRINITY_DN16165_c0_g1	cme:CYME_CME146C	53.2	1.4e-07	NA	NA	NA	NA	NA	NA	NA	NA	NA
TRINITY_DN1616_c0_g1	osa:4351412	100	3.4e-35	NA	NA	NA	NA	NA	NA	NA	NA	NA
TRINITY_DN16170_c0_g1	ini:109167888	50.7	3.6e-17	NA	NA	NA	NA	NA	NA	NA	NA	NA
TRINITY_DN16170_c2_g1	mcha:111010887	54.4	7.8e-13	-	(3S	K14175	(3S,6E)-nerolidol synthase	EC:4.2.3.48	mcha00909	Sesquiterpenoid and triterpenoid biosynthesis	Metabolism	Metabolism of terpenoids and polyketides
TRINITY_DN16173_c0_g1	osa:4328647	100	1.7e-45	-	EIN3-binding F-box protein 1 isoform X1	K14515	EIN3-binding F-box protein	-	osa04016	MAPK signaling pathway - plant	Environmental Information Processing	Signal transduction
TRINITY_DN16173_c0_g1	osa:4328647	100	1.7e-45	-	EIN3-binding F-box protein 1 isoform X1	K14515	EIN3-binding F-box protein	-	osa04075	Plant hormone signal transduction	Environmental Information Processing	Signal transduction
TRINITY_DN16179_c0_g1	pxb:103942743	56.2	3.7e-23	NA	NA	NA	NA	NA	NA	NA	NA	NA
TRINITY_DN16179_c0_g2	pxb:103942743	48.3	6.1e-11	NA	NA	NA	NA	NA	NA	NA	NA	NA
TRINITY_DN16180_c0_g1	hbr:110665573	33.4	4.1e-49	-	flavonol synthase/flavanone 3-hydroxylase-like	K05278	flavonol synthase	EC:1.14.20.6	hbr00941	Flavonoid biosynthesis	Metabolism	Biosynthesis of other secondary metabolites
TRINITY_DN16182_c0_g2	egr:104454293	79.4	9.9e-149	-	very-long-chain enoyl-CoA reductase	K10258	very-long-chain enoyl-CoA reductase	EC:1.3.1.93	egr00062	Fatty acid elongation	Metabolism	Lipid metabolism
TRINITY_DN16182_c0_g2	egr:104454293	79.4	9.9e-149	-	very-long-chain enoyl-CoA reductase	K10258	very-long-chain enoyl-CoA reductase	EC:1.3.1.93	egr01040	Biosynthesis of unsaturated fatty acids	Metabolism	Lipid metabolism
TRINITY_DN16186_c0_g1	vvi:100258879	75.2	7.1e-95	-	cytochrome b6-f complex iron-sulfur subunit 1	K02636	cytochrome b6-f complex iron-sulfur subunit	EC:1.10.9.1	vvi00195	Photosynthesis	Metabolism	Energy metabolism
TRINITY_DN16189_c0_g1	vvi:100242305	53.1	8.6e-142	NA	NA	NA	NA	NA	NA	NA	NA	NA
TRINITY_DN16198_c0_g3	osa:4345209	100	4.8e-37	NA	NA	NA	NA	NA	NA	NA	NA	NA
TRINITY_DN16199_c0_g1	gmx:100819536	99.2	1.9e-65	-	5'-adenylylsulfate reductase 3	K05907	adenylyl-sulfate reductase (glutathione)	EC:1.8.4.9	gmx00920	Sulfur metabolism	Metabolism	Energy metabolism
TRINITY_DN16202_c0_g1	cre:CHLREDRAFT_205525	49.3	6.7e-10	-	predicted protein	K10260	F-box and WD-40 domain protein 7	-	cre04120	Ubiquitin mediated proteolysis	Genetic Information Processing	Folding, sorting and degradation
TRINITY_DN16207_c0_g1	cann:107879597	42.7	1.4e-86	NA	NA	NA	NA	NA	NA	NA	NA	NA
TRINITY_DN16209_c0_g1	dct:110104324	78.6	2.7e-71	NA	NA	NA	NA	NA	NA	NA	NA	NA
TRINITY_DN16209_c0_g2	egu:105059616	70.7	4.1e-10	NA	NA	NA	NA	NA	NA	NA	NA	NA
TRINITY_DN16209_c0_g3	pxb:103938354	74.9	1.9e-70	NA	NA	NA	NA	NA	NA	NA	NA	NA
TRINITY_DN16211_c0_g1	osa:4339572	100	1.8e-58	-	60S ribosomal protein L35a-2	K02917	large subunit ribosomal protein L35Ae	-	osa03010	Ribosome	Genetic Information Processing	Translation
TRINITY_DN16216_c0_g1	osa:4336397	100	4e-68	-	60S ribosomal protein L14-1	K02875	large subunit ribosomal protein L14e	-	osa03010	Ribosome	Genetic Information Processing	Translation
TRINITY_DN16216_c0_g2	gmx:100499889	100	6.8e-49	-	uncharacterized LOC100499889	K02875	large subunit ribosomal protein L14e	-	gmx03010	Ribosome	Genetic Information Processing	Translation
TRINITY_DN16217_c0_g1	mcha:111022637	89.7	4.5e-53	NA	NA	NA	NA	NA	NA	NA	NA	NA
TRINITY_DN16217_c0_g4	nnu:104609856	82.5	1.5e-11	NA	NA	NA	NA	NA	NA	NA	NA	NA
TRINITY_DN16222_c0_g1	brp:103862937	76.1	3.3e-22	-	60S ribosomal protein L38-like	K02923	large subunit ribosomal protein L38e	-	brp03010	Ribosome	Genetic Information Processing	Translation
TRINITY_DN16225_c0_g1	csl:COCSUDRAFT_53031	61.9	3e-16	-	ribosomal protein 60S	K02942	large subunit ribosomal protein LP1	-	csl03010	Ribosome	Genetic Information Processing	Translation
TRINITY_DN16227_c0_g1	cann:107862009	45.1	2.1e-85	NA	NA	NA	NA	NA	NA	NA	NA	NA
TRINITY_DN16229_c0_g1	han:110942545	70.7	3.1e-251	-	poly [ADP-ribose] polymerase 2	K10798	poly [ADP-ribose] polymerase	EC:2.4.2.30	han03410	Base excision repair	Genetic Information Processing	Replication and repair
TRINITY_DN16235_c0_g1	mdm:103438050	43.9	7e-73	NA	NA	NA	NA	NA	NA	NA	NA	NA
TRINITY_DN16236_c0_g2	soe:110800001	40.4	5.9e-11	-	cytochrome P450 734A1	K15639	PHYB activation tagged suppressor 1	EC:1.14.-.-	soe00905	Brassinosteroid biosynthesis	Metabolism	Metabolism of terpenoids and polyketides
TRINITY_DN16251_c0_g1	zma:100191456	74.7	3e-26	NA	NA	NA	NA	NA	NA	NA	NA	NA
TRINITY_DN16251_c0_g2	mis:MICPUN_81357	60.2	4.4e-26	NA	NA	NA	NA	NA	NA	NA	NA	NA
TRINITY_DN16254_c0_g2	mdm:103428289	77.7	4.9e-80	-	50S ribosomal protein L7/L12-like	K02935	large subunit ribosomal protein L7/L12	-	mdm03010	Ribosome	Genetic Information Processing	Translation
TRINITY_DN16259_c0_g2	spen:107031380	80.7	4e-45	-	50S ribosomal protein L28	K02902	large subunit ribosomal protein L28	-	spen03010	Ribosome	Genetic Information Processing	Translation
TRINITY_DN16260_c0_g1	gmx:100791154	100	2.7e-42	SMT2-2	24-methylenesterol C-methyltransferase 2	K08242	24-methylenesterol C-methyltransferase	EC:2.1.1.143	gmx00100	Steroid biosynthesis	Metabolism	Lipid metabolism
TRINITY_DN16260_c0_g2	gmx:100791154	99	2.7e-54	SMT2-2	24-methylenesterol C-methyltransferase 2	K08242	24-methylenesterol C-methyltransferase	EC:2.1.1.143	gmx00100	Steroid biosynthesis	Metabolism	Lipid metabolism
TRINITY_DN16265_c0_g1	pmum:103333467	60.6	7.1e-53	NA	NA	NA	NA	NA	NA	NA	NA	NA
TRINITY_DN16283_c1_g4	soe:110792677	34.9	3.2e-07	NA	NA	NA	NA	NA	NA	NA	NA	NA
TRINITY_DN16285_c0_g1	atr:18436185	77	3.2e-68	NA	NA	NA	NA	NA	NA	NA	NA	NA
TRINITY_DN16287_c0_g5	adu:107483935	56.7	1.4e-14	-	uncharacterized protein LOC107483935	K02130	F-type H+-transporting ATPase subunit f	-	adu00190	Oxidative phosphorylation	Metabolism	Energy metabolism
TRINITY_DN16291_c0_g1	sind:105170533	73.1	4.6e-48	-	60S ribosomal protein L32-1-like	K02912	large subunit ribosomal protein L32e	-	sind03010	Ribosome	Genetic Information Processing	Translation
TRINITY_DN16293_c0_g2	ccaj:109795874	69.3	3.8e-16	NA	NA	NA	NA	NA	NA	NA	NA	NA
TRINITY_DN16294_c0_g2	ccaj:109817199	78.4	2.5e-37	NA	NA	NA	NA	NA	NA	NA	NA	NA
TRINITY_DN16294_c0_g3	olu:OSTLU_34076	75	2.4e-30	NA	NA	NA	NA	NA	NA	NA	NA	NA
TRINITY_DN16302_c0_g1	nsy:104218533	66.2	9.7e-19	NA	NA	NA	NA	NA	NA	NA	NA	NA
TRINITY_DN16325_c0_g1	vcn:VOLCADRAFT_109683	81.2	7.6e-34	-	hypothetical protein	K03265	peptide chain release factor subunit 1	-	vcn03015	mRNA surveillance pathway	Genetic Information Processing	Translation
TRINITY_DN16334_c0_g1	mus:103985584	50	9.4e-10	-	calcium and calcium/calmodulin-dependent serine/threonine-protein kinase	K13412	calcium-dependent protein kinase	EC:2.7.11.1	mus04626	Plant-pathogen interaction	Organismal Systems	Environmental adaptation
TRINITY_DN16339_c1_g1	zju:107424382	73.5	1.6e-27	NA	NA	NA	NA	NA	NA	NA	NA	NA
TRINITY_DN16344_c0_g4	brp:103870576	56.5	2.5e-14	-	importin subunit beta-1	K14293	importin subunit beta-1	-	brp03013	RNA transport	Genetic Information Processing	Translation
TRINITY_DN16347_c0_g2	gmx:100804892	98.9	2.3e-52	-	probable cinnamyl alcohol dehydrogenase	K00083	cinnamyl-alcohol dehydrogenase	EC:1.1.1.195	gmx00940	Phenylpropanoid biosynthesis	Metabolism	Biosynthesis of other secondary metabolites
TRINITY_DN16350_c0_g1	ccaj:109795950	54.9	7.3e-08	-	trehalose-phosphate phosphatase A-like	K01087	trehalose 6-phosphate phosphatase	EC:3.1.3.12	ccaj00500	Starch and sucrose metabolism	Metabolism	Carbohydrate metabolism
TRINITY_DN16358_c0_g1	sind:105166719	64.1	2.9e-100	-	acidic endochitinase SE2	K01183	chitinase	EC:3.2.1.14	sind00520	Amino sugar and nucleotide sugar metabolism	Metabolism	Carbohydrate metabolism
TRINITY_DN16362_c0_g1	osa:4329532	100	1.9e-207	-	1	K00700	1,4-alpha-glucan branching enzyme	EC:2.4.1.18	osa00500	Starch and sucrose metabolism	Metabolism	Carbohydrate metabolism
TRINITY_DN1636_c0_g1	gmx:100800036	100	4.9e-15	AOC2	allene oxide cyclase 4, chloroplastic-like	K10525	allene oxide cyclase	EC:5.3.99.6	gmx00592	alpha-Linolenic acid metabolism	Metabolism	Lipid metabolism
TRINITY_DN16375_c0_g2	mng:MNEG_11651	48.8	3.3e-22	NA	NA	NA	NA	NA	NA	NA	NA	NA
TRINITY_DN16375_c0_g3	vcn:VOLCADRAFT_74917	58.6	2.2e-48	NA	NA	NA	NA	NA	NA	NA	NA	NA
TRINITY_DN16382_c0_g1	pxb:103929228	87.5	1.1e-135	-	xylose isomerase-like	K01805	xylose isomerase	EC:5.3.1.5	pxb00040	Pentose and glucuronate interconversions	Metabolism	Carbohydrate metabolism
TRINITY_DN16382_c0_g1	pxb:103929228	87.5	1.1e-135	-	xylose isomerase-like	K01805	xylose isomerase	EC:5.3.1.5	pxb00051	Fructose and mannose metabolism	Metabolism	Carbohydrate metabolism
TRINITY_DN16392_c0_g2	ccaj:109804836	45.1	1.1e-17	-	uridine kinase-like protein 4 isoform X1	K00876	uridine kinase	EC:2.7.1.48	ccaj00240	Pyrimidine metabolism	Metabolism	Nucleotide metabolism
TRINITY_DN16393_c0_g1	tcc:18585709	84.7	3e-27	-	putative ABC transporter C family member 15	K05665	ATP-binding cassette, subfamily C (CFTR/MRP), member 1	-	tcc02010	ABC transporters	Environmental Information Processing	Membrane transport
TRINITY_DN16395_c0_g1	tcc:18599268	58.4	3.7e-20	NA	NA	NA	NA	NA	NA	NA	NA	NA
TRINITY_DN16396_c0_g3	csat:104781435	44.1	1.2e-09	NA	NA	NA	NA	NA	NA	NA	NA	NA
TRINITY_DN16398_c0_g1	bdi:100844103	44.2	9.7e-48	NA	NA	NA	NA	NA	NA	NA	NA	NA
TRINITY_DN163_c0_g1	obr:102715748	95.6	1.5e-16	NA	NA	NA	NA	NA	NA	NA	NA	NA
TRINITY_DN16403_c0_g1	nta:107769143	67.8	2e-17	NA	NA	NA	NA	NA	NA	NA	NA	NA
TRINITY_DN16407_c0_g2	lang:109334613	60.3	1.4e-42	-	triosephosphate isomerase	K01803	triosephosphate isomerase (TIM)	EC:5.3.1.1	lang00010	Glycolysis / Gluconeogenesis	Metabolism	Carbohydrate metabolism
TRINITY_DN16407_c0_g2	lang:109334613	60.3	1.4e-42	-	triosephosphate isomerase	K01803	triosephosphate isomerase (TIM)	EC:5.3.1.1	lang00051	Fructose and mannose metabolism	Metabolism	Carbohydrate metabolism
TRINITY_DN16407_c0_g2	lang:109334613	60.3	1.4e-42	-	triosephosphate isomerase	K01803	triosephosphate isomerase (TIM)	EC:5.3.1.1	lang00562	Inositol phosphate metabolism	Metabolism	Carbohydrate metabolism
TRINITY_DN16407_c0_g2	lang:109334613	60.3	1.4e-42	-	triosephosphate isomerase	K01803	triosephosphate isomerase (TIM)	EC:5.3.1.1	lang00710	Carbon fixation in photosynthetic organisms	Metabolism	Energy metabolism
TRINITY_DN16408_c0_g2	gra:105790334	79.7	2.3e-59	-	40S ribosomal protein S13-like	K02953	small subunit ribosomal protein S13e	-	gra03010	Ribosome	Genetic Information Processing	Translation
TRINITY_DN16420_c0_g1	rcu:8285153	82.6	3.8e-114	-	5'-methylthioadenosine/S-adenosylhomocysteine nucleosidase 2	K01244	5'-methylthioadenosine nucleosidase	EC:3.2.2.16	rcu00270	Cysteine and methionine metabolism	Metabolism	Amino acid metabolism
TRINITY_DN16421_c0_g1	cit:102613427	78.6	2.2e-201	NA	NA	NA	NA	NA	NA	NA	NA	NA
TRINITY_DN16427_c0_g1	ini:109165491	51.4	1.4e-111	NA	NA	NA	NA	NA	NA	NA	NA	NA
TRINITY_DN16432_c0_g1	han:110893982	51.2	8.6e-33	NA	NA	NA	NA	NA	NA	NA	NA	NA
TRINITY_DN16438_c0_g4	osa:4328121	100	4.7e-99	NA	NA	NA	NA	NA	NA	NA	NA	NA
TRINITY_DN16440_c0_g2	cvr:CHLNCDRAFT_27566	69.5	8.6e-25	-	hypothetical protein	K02975	small subunit ribosomal protein S25e	-	cvr03010	Ribosome	Genetic Information Processing	Translation
TRINITY_DN16440_c0_g3	cvr:CHLNCDRAFT_27566	69.5	5.4e-24	-	hypothetical protein	K02975	small subunit ribosomal protein S25e	-	cvr03010	Ribosome	Genetic Information Processing	Translation
TRINITY_DN16444_c0_g1	sind:105162010	74.5	2.7e-15	-	UDP-N-acetylglucosamine transferase subunit ALG14 homolog	K07441	beta-1,4-N-acetylglucosaminyltransferase	EC:2.4.1.141	sind00510	N-Glycan biosynthesis	Metabolism	Glycan biosynthesis and metabolism
TRINITY_DN16445_c0_g2	mdm:103412324	50	4e-17	NA	NA	NA	NA	NA	NA	NA	NA	NA
TRINITY_DN16445_c0_g3	cann:107868830	61.1	1.7e-20	NA	NA	NA	NA	NA	NA	NA	NA	NA
TRINITY_DN16449_c0_g1	tcc:18599143	89.1	6.8e-85	NA	NA	NA	NA	NA	NA	NA	NA	NA
TRINITY_DN16453_c0_g2	vvi:104882322	50.6	7.6e-18	-	formin-like protein 5	K05747	Wiskott-Aldrich syndrome protein	-	vvi04144	Endocytosis	Cellular Processes	Transport and catabolism
TRINITY_DN16455_c0_g1	mis:MICPUN_91839	62.5	7.4e-15	-	predicted protein	K12891	splicing factor, arginine/serine-rich 2	-	mis03040	Spliceosome	Genetic Information Processing	Transcription
TRINITY_DN16458_c0_g1	cre:CHLREDRAFT_165812	70.6	6.8e-21	NA	NA	NA	NA	NA	NA	NA	NA	NA
TRINITY_DN16467_c1_g2	sita:101767079	48.9	3.7e-46	-	LOW QUALITY PROTEIN: alpha-glucosidase 2-like	K01228	mannosyl-oligosaccharide glucosidase	EC:3.2.1.106	sita00510	N-Glycan biosynthesis	Metabolism	Glycan biosynthesis and metabolism
TRINITY_DN16467_c1_g2	sita:101767079	48.9	3.7e-46	-	LOW QUALITY PROTEIN: alpha-glucosidase 2-like	K01228	mannosyl-oligosaccharide glucosidase	EC:3.2.1.106	sita04141	Protein processing in endoplasmic reticulum	Genetic Information Processing	Folding, sorting and degradation
TRINITY_DN16467_c1_g5	egr:104444530	84.3	5.6e-52	NA	NA	NA	NA	NA	NA	NA	NA	NA
TRINITY_DN16468_c0_g1	ini:109190582	48.8	6.8e-16	NA	NA	NA	NA	NA	NA	NA	NA	NA
TRINITY_DN16471_c0_g1	sly:101251764	87.2	2.7e-16	-	pantothenate kinase 2	K09680	type II pantothenate kinase	EC:2.7.1.33	sly00770	Pantothenate and CoA biosynthesis	Metabolism	Metabolism of cofactors and vitamins
TRINITY_DN16477_c0_g2	gmx:100783122	100	6.6e-43	-	NEDD8-conjugating enzyme Ubc12	K10579	ubiquitin-conjugating enzyme E2 M	-	gmx04120	Ubiquitin mediated proteolysis	Genetic Information Processing	Folding, sorting and degradation
TRINITY_DN16478_c0_g1	cam:101503513	71.1	5.2e-65	-	60S ribosomal protein L12	K02870	large subunit ribosomal protein L12e	-	cam03010	Ribosome	Genetic Information Processing	Translation
TRINITY_DN16478_c0_g2	cme:CYME_CMS284C	72.5	2.8e-63	-	60S ribosomal protein L12	K02870	large subunit ribosomal protein L12e	-	cme03010	Ribosome	Genetic Information Processing	Translation
TRINITY_DN16479_c0_g1	nta:107807677	81.7	1.5e-51	NA	NA	NA	NA	NA	NA	NA	NA	NA
TRINITY_DN16486_c0_g1	mus:103985574	62	3.6e-26	-	RNA-binding protein 8A-like	K12876	RNA-binding protein 8A	-	mus03040	Spliceosome	Genetic Information Processing	Transcription
TRINITY_DN16486_c0_g1	mus:103985574	62	3.6e-26	-	RNA-binding protein 8A-like	K12876	RNA-binding protein 8A	-	mus03013	RNA transport	Genetic Information Processing	Translation
TRINITY_DN16486_c0_g1	mus:103985574	62	3.6e-26	-	RNA-binding protein 8A-like	K12876	RNA-binding protein 8A	-	mus03015	mRNA surveillance pathway	Genetic Information Processing	Translation
TRINITY_DN16493_c0_g1	ghi:107924805	71.9	1.4e-77	-	casein kinase II subunit beta'-like isoform X1	K03115	casein kinase II subunit beta	-	ghi03008	Ribosome biogenesis in eukaryotes	Genetic Information Processing	Translation
TRINITY_DN16493_c0_g1	ghi:107924805	71.9	1.4e-77	-	casein kinase II subunit beta'-like isoform X1	K03115	casein kinase II subunit beta	-	ghi04712	Circadian rhythm - plant	Organismal Systems	Environmental adaptation
TRINITY_DN16494_c0_g4	han:110927145	95.5	1.5e-87	NA	NA	NA	NA	NA	NA	NA	NA	NA
TRINITY_DN16495_c0_g1	csl:COCSUDRAFT_32959	72.8	2e-33	-	ribosomal protein L37 component of cytosolic 80S ribosome and 60S large subunit	K02922	large subunit ribosomal protein L37e	-	csl03010	Ribosome	Genetic Information Processing	Translation
TRINITY_DN16495_c0_g2	bna:106356374	69.5	2e-30	-	60S ribosomal protein L37-2-like	K02922	large subunit ribosomal protein L37e	-	bna03010	Ribosome	Genetic Information Processing	Translation
TRINITY_DN16496_c0_g1	tcc:18606683	68.3	1.4e-88	NA	NA	NA	NA	NA	NA	NA	NA	NA
TRINITY_DN16501_c0_g1	cic:CICLE_v10001826mg	81.9	1.4e-139	-	hypothetical protein	K08489	syntaxin 16	-	cic04130	SNARE interactions in vesicular transport	Genetic Information Processing	Folding, sorting and degradation
TRINITY_DN16505_c0_g1	pxb:103964680	70.5	1.4e-121	-	ubiquitin fusion degradation protein 1 homolog	K14016	ubiquitin fusion degradation protein 1	-	pxb04141	Protein processing in endoplasmic reticulum	Genetic Information Processing	Folding, sorting and degradation
TRINITY_DN16508_c0_g2	osa:4341940	100	2e-61	NA	NA	NA	NA	NA	NA	NA	NA	NA
TRINITY_DN16508_c0_g4	obr:102717793	97.2	7e-16	NA	NA	NA	NA	NA	NA	NA	NA	NA
TRINITY_DN16509_c0_g1	cmo:103497402	59.7	8.2e-51	NA	NA	NA	NA	NA	NA	NA	NA	NA
TRINITY_DN16513_c0_g1	thj:104809028	55.3	1e-77	NA	NA	NA	NA	NA	NA	NA	NA	NA
TRINITY_DN16515_c0_g1	nta:107785229	80.5	2.9e-68	-	17.6 kDa class I heat shock protein 3-like	K13993	HSP20 family protein	-	nta04141	Protein processing in endoplasmic reticulum	Genetic Information Processing	Folding, sorting and degradation
TRINITY_DN16518_c0_g1	thj:104799358	81.5	1.2e-57	-	40S ribosomal protein S23	K02973	small subunit ribosomal protein S23e	-	thj03010	Ribosome	Genetic Information Processing	Translation
TRINITY_DN16519_c0_g1	ccaj:109793136	73.5	2.9e-13	-	putative calcium-binding protein CML19	K13448	calcium-binding protein CML	-	ccaj04626	Plant-pathogen interaction	Organismal Systems	Environmental adaptation
TRINITY_DN16520_c0_g1	obr:102718830	61.1	1.9e-07	-	molybdopterin biosynthesis protein CNX1	K15376	gephyrin	EC:2.10.1.1 2.7.7.75	obr00790	Folate biosynthesis	Metabolism	Metabolism of cofactors and vitamins
TRINITY_DN16524_c0_g2	gmx:100811552	100	8.9e-33	NA	NA	NA	NA	NA	NA	NA	NA	NA
TRINITY_DN16531_c0_g1	mpp:MICPUCDRAFT_30148	76	5.1e-37	-	hypothetical protein	K02929	large subunit ribosomal protein L44e	-	mpp03010	Ribosome	Genetic Information Processing	Translation
TRINITY_DN16531_c0_g2	mpp:MICPUCDRAFT_30148	73.3	1.9e-38	-	hypothetical protein	K02929	large subunit ribosomal protein L44e	-	mpp03010	Ribosome	Genetic Information Processing	Translation
TRINITY_DN16532_c0_g1	bdi:100838421	50.6	3.9e-16	NA	NA	NA	NA	NA	NA	NA	NA	NA
TRINITY_DN16538_c0_g1	osa:4341354	99.8	2e-220	NA	NA	NA	NA	NA	NA	NA	NA	NA
TRINITY_DN16548_c0_g1	han:110865769	95.6	2.1e-130	-	proteasome subunit alpha type-4	K02728	20S proteasome subunit alpha 3	EC:3.4.25.1	han03050	Proteasome	Genetic Information Processing	Folding, sorting and degradation
TRINITY_DN16557_c0_g2	rcu:8277278	86.6	2.6e-78	-	uncharacterized protein LOC8277278	K00074	3-hydroxybutyryl-CoA dehydrogenase	EC:1.1.1.157	rcu00650	Butanoate metabolism	Metabolism	Carbohydrate metabolism
TRINITY_DN16557_c0_g2	rcu:8277278	86.6	2.6e-78	-	uncharacterized protein LOC8277278	K00074	3-hydroxybutyryl-CoA dehydrogenase	EC:1.1.1.157	rcu00360	Phenylalanine metabolism	Metabolism	Amino acid metabolism
TRINITY_DN16558_c0_g1	zju:107417426	52.4	6.5e-06	-	probable bifunctional methylthioribulose-1-phosphate dehydratase/enolase-phosphatase E1 2	K16054	methylthioribulose 1-phosphate dehydratase / enolase-phosphatase E1	EC:4.2.1.109 3.1.3.77	zju00270	Cysteine and methionine metabolism	Metabolism	Amino acid metabolism
TRINITY_DN16561_c0_g1	cit:102629861	36.1	1.5e-23	NA	NA	NA	NA	NA	NA	NA	NA	NA
TRINITY_DN16564_c0_g1	nnu:104597433	64.1	5.1e-15	NA	NA	NA	NA	NA	NA	NA	NA	NA
TRINITY_DN16570_c0_g1	pxb:103928537	75.2	1.2e-32	-	serine/arginine-rich SC35-like splicing factor SCL33	K12900	FUS-interacting serine-arginine-rich protein 1	-	pxb03040	Spliceosome	Genetic Information Processing	Transcription
TRINITY_DN16575_c0_g1	ccp:CHC_T00010216001	54.8	7.3e-25	-	ribosomal protein L24	K02896	large subunit ribosomal protein L24e	-	ccp03010	Ribosome	Genetic Information Processing	Translation
TRINITY_DN16575_c0_g2	ccp:CHC_T00010216001	52.9	8.4e-24	-	ribosomal protein L24	K02896	large subunit ribosomal protein L24e	-	ccp03010	Ribosome	Genetic Information Processing	Translation
TRINITY_DN16575_c0_g3	ccp:CHC_T00010216001	52.9	9.5e-24	-	ribosomal protein L24	K02896	large subunit ribosomal protein L24e	-	ccp03010	Ribosome	Genetic Information Processing	Translation
TRINITY_DN16578_c0_g3	cvr:CHLNCDRAFT_56162	71.6	7.9e-22	NA	NA	NA	NA	NA	NA	NA	NA	NA
TRINITY_DN16578_c0_g4	cit:102625356	82.7	6.4e-30	NA	NA	NA	NA	NA	NA	NA	NA	NA
TRINITY_DN16583_c1_g1	bna:106380061	43.6	1.8e-49	-	vegetative storage protein 2	K20728	vegetative storage protein 2	-	bna04016	MAPK signaling pathway - plant	Environmental Information Processing	Signal transduction
TRINITY_DN16587_c0_g1	var:108323000	96.4	8.4e-49	-	eukaryotic translation initiation factor 3 subunit A	K03254	translation initiation factor 3 subunit A	-	var03013	RNA transport	Genetic Information Processing	Translation
TRINITY_DN16590_c0_g1	cit:102618203	77.6	3.3e-119	NA	NA	NA	NA	NA	NA	NA	NA	NA
TRINITY_DN16592_c0_g1	csl:COCSUDRAFT_30528	66	2.5e-26	NA	NA	NA	NA	NA	NA	NA	NA	NA
TRINITY_DN16597_c0_g2	gmx:100797748	100	3.1e-36	-	eukaryotic translation initiation factor 3 subunit E	K03250	translation initiation factor 3 subunit E	-	gmx03013	RNA transport	Genetic Information Processing	Translation
TRINITY_DN16600_c0_g2	han:110908540	91.4	1.7e-56	-	dihydroxy-acid dehydratase	K01687	dihydroxy-acid dehydratase	EC:4.2.1.9	han00290	Valine, leucine and isoleucine biosynthesis	Metabolism	Amino acid metabolism
TRINITY_DN16600_c0_g2	han:110908540	91.4	1.7e-56	-	dihydroxy-acid dehydratase	K01687	dihydroxy-acid dehydratase	EC:4.2.1.9	han00770	Pantothenate and CoA biosynthesis	Metabolism	Metabolism of cofactors and vitamins
TRINITY_DN16600_c0_g3	ini:109161947	83.7	3.2e-236	-	dihydroxy-acid dehydratase	K01687	dihydroxy-acid dehydratase	EC:4.2.1.9	ini00290	Valine, leucine and isoleucine biosynthesis	Metabolism	Amino acid metabolism
TRINITY_DN16600_c0_g3	ini:109161947	83.7	3.2e-236	-	dihydroxy-acid dehydratase	K01687	dihydroxy-acid dehydratase	EC:4.2.1.9	ini00770	Pantothenate and CoA biosynthesis	Metabolism	Metabolism of cofactors and vitamins
TRINITY_DN16602_c0_g1	cann:107874343	47.6	4.3e-16	-	ABC transporter C family member 10-like	K05666	ATP-binding cassette, subfamily C (CFTR/MRP), member 2	-	cann02010	ABC transporters	Environmental Information Processing	Membrane transport
TRINITY_DN16604_c0_g1	vcn:VOLCADRAFT_82555	35.1	4.9e-29	NA	NA	NA	NA	NA	NA	NA	NA	NA
TRINITY_DN16607_c0_g1	nto:104109223	75.6	2.9e-69	-	photosystem II reaction center Psb28 protein	K08903	photosystem II 13kDa protein	-	nto00195	Photosynthesis	Metabolism	Energy metabolism
TRINITY_DN16612_c0_g1	gsl:Gasu_23880	48.5	1.2e-13	-	peptide chain release factor eRF subunit 2	K03267	peptide chain release factor subunit 3	-	gsl03015	mRNA surveillance pathway	Genetic Information Processing	Translation
TRINITY_DN16617_c0_g1	spen:107004692	45.3	6.9e-29	NA	NA	NA	NA	NA	NA	NA	NA	NA
TRINITY_DN16619_c0_g1	nnu:104597170	42.8	2e-96	NA	NA	NA	NA	NA	NA	NA	NA	NA
TRINITY_DN16625_c0_g1	vcn:VOLCADRAFT_109213	62.4	5.6e-24	rpl36	component of cytosolic 80S ribosome and 60S large subunit	K02920	large subunit ribosomal protein L36e	-	vcn03010	Ribosome	Genetic Information Processing	Translation
TRINITY_DN16625_c0_g2	bdi:100835084	65.2	3.2e-25	-	60S ribosomal protein L36-3	K02920	large subunit ribosomal protein L36e	-	bdi03010	Ribosome	Genetic Information Processing	Translation
TRINITY_DN16625_c0_g3	vcn:VOLCADRAFT_109213	63.6	3.3e-23	rpl36	component of cytosolic 80S ribosome and 60S large subunit	K02920	large subunit ribosomal protein L36e	-	vcn03010	Ribosome	Genetic Information Processing	Translation
TRINITY_DN16626_c0_g1	osa:4333150	99.3	3.3e-80	-	40S ribosomal protein S19	K02966	small subunit ribosomal protein S19e	-	osa03010	Ribosome	Genetic Information Processing	Translation
TRINITY_DN16628_c0_g3	sbi:110436292	73.3	1.3e-12	NA	NA	NA	NA	NA	NA	NA	NA	NA
TRINITY_DN16631_c0_g1	obr:102704059	94.1	4.4e-83	-	60S ribosomal protein L28-1-like	K02903	large subunit ribosomal protein L28e	-	obr03010	Ribosome	Genetic Information Processing	Translation
TRINITY_DN16634_c0_g2	boe:106329472	38.4	2.1e-33	-	uncharacterized protein LOC106329472	K12813	pre-mRNA-splicing factor ATP-dependent RNA helicase DHX16	EC:3.6.4.13	boe03040	Spliceosome	Genetic Information Processing	Transcription
TRINITY_DN16637_c0_g1	gra:105777887	100	9.9e-38	-	proteasome subunit alpha type-5	K02729	20S proteasome subunit alpha 5	EC:3.4.25.1	gra03050	Proteasome	Genetic Information Processing	Folding, sorting and degradation
TRINITY_DN16638_c2_g1	csat:104723377	42.7	2.8e-38	-	isoleucine--tRNA ligase	K01870	isoleucyl-tRNA synthetase	EC:6.1.1.5	csat00970	Aminoacyl-tRNA biosynthesis	Genetic Information Processing	Translation
TRINITY_DN16642_c0_g1	spen:107020008	32.2	8.5e-23	NA	NA	NA	NA	NA	NA	NA	NA	NA
TRINITY_DN16643_c0_g1	gmx:100816962	98.7	6.5e-136	GSTL1	protein IN2-1 homolog B-like	K00799	glutathione S-transferase	EC:2.5.1.18	gmx00480	Glutathione metabolism	Metabolism	Metabolism of other amino acids
TRINITY_DN16647_c0_g1	egr:104425865	81.3	4.1e-24	NA	NA	NA	NA	NA	NA	NA	NA	NA
TRINITY_DN16650_c0_g4	osa:4337696	100	8.8e-16	-	glutamate--cysteine ligase A	K01919	glutamate--cysteine ligase	EC:6.3.2.2	osa00270	Cysteine and methionine metabolism	Metabolism	Amino acid metabolism
TRINITY_DN16650_c0_g4	osa:4337696	100	8.8e-16	-	glutamate--cysteine ligase A	K01919	glutamate--cysteine ligase	EC:6.3.2.2	osa00480	Glutathione metabolism	Metabolism	Metabolism of other amino acids
TRINITY_DN16653_c0_g2	sind:105178134	87.5	5.4e-28	NA	NA	NA	NA	NA	NA	NA	NA	NA
TRINITY_DN16657_c0_g1	mng:MNEG_3250	56.8	6.1e-23	-	hypothetical protein	K02917	large subunit ribosomal protein L35Ae	-	mng03010	Ribosome	Genetic Information Processing	Translation
TRINITY_DN16657_c0_g2	gsl:Gasu_43860	53.1	1e-22	-	60S ribosomal protein L35Ae isoform 1	K02917	large subunit ribosomal protein L35Ae	-	gsl03010	Ribosome	Genetic Information Processing	Translation
TRINITY_DN16665_c0_g1	ota:OT_ostta10g01280	64.5	7.9e-22	-	Histidine kinase-like ATPase	K04079	molecular chaperone HtpG	-	ota04141	Protein processing in endoplasmic reticulum	Genetic Information Processing	Folding, sorting and degradation
TRINITY_DN16668_c0_g2	vvi:100232937	34.3	6.4e-61	VVGAI1	DELLA protein GAI1	K14494	DELLA protein	-	vvi04075	Plant hormone signal transduction	Environmental Information Processing	Signal transduction
TRINITY_DN16670_c0_g1	han:110914965	50	4.5e-97	-	uncharacterized protein LOC110914965	K10666	E3 ubiquitin-protein ligase RNF5	EC:2.3.2.27	han04141	Protein processing in endoplasmic reticulum	Genetic Information Processing	Folding, sorting and degradation
TRINITY_DN16672_c0_g1	cann:107850946	83.3	1.6e-60	-	30S ribosomal protein S16-like	K02959	small subunit ribosomal protein S16	-	cann03010	Ribosome	Genetic Information Processing	Translation
TRINITY_DN16675_c0_g1	gmx:100305750	100	6.1e-34	HSP17.5-E	17.5 kDa class I heat shock protein	K13993	HSP20 family protein	-	gmx04141	Protein processing in endoplasmic reticulum	Genetic Information Processing	Folding, sorting and degradation
TRINITY_DN16684_c0_g2	sind:105176566	64.1	6.3e-119	NA	NA	NA	NA	NA	NA	NA	NA	NA
TRINITY_DN16685_c0_g1	gmx:100526985	100	2.9e-34	-	uncharacterized LOC100526985	K07466	replication factor A1	-	gmx03030	DNA replication	Genetic Information Processing	Replication and repair
TRINITY_DN16685_c0_g1	gmx:100526985	100	2.9e-34	-	uncharacterized LOC100526985	K07466	replication factor A1	-	gmx03420	Nucleotide excision repair	Genetic Information Processing	Replication and repair
TRINITY_DN16685_c0_g1	gmx:100526985	100	2.9e-34	-	uncharacterized LOC100526985	K07466	replication factor A1	-	gmx03430	Mismatch repair	Genetic Information Processing	Replication and repair
TRINITY_DN16685_c0_g1	gmx:100526985	100	2.9e-34	-	uncharacterized LOC100526985	K07466	replication factor A1	-	gmx03440	Homologous recombination	Genetic Information Processing	Replication and repair
TRINITY_DN16694_c0_g3	fve:101311565	54.7	1.1e-45	NA	NA	NA	NA	NA	NA	NA	NA	NA
TRINITY_DN16695_c1_g1	sot:102580238	68.5	3.5e-116	-	magnesium protoporphyrin IX methyltransferase	K03428	magnesium-protoporphyrin O-methyltransferase	EC:2.1.1.11	sot00860	Porphyrin and chlorophyll metabolism	Metabolism	Metabolism of cofactors and vitamins
TRINITY_DN16698_c0_g1	han:110886575	30.3	3.5e-45	NA	NA	NA	NA	NA	NA	NA	NA	NA
TRINITY_DN16699_c0_g1	hbr:110634088	84.4	1e-220	NA	NA	NA	NA	NA	NA	NA	NA	NA
TRINITY_DN16700_c0_g1	gsl:Gasu_59680	34.2	2.7e-18	NA	NA	NA	NA	NA	NA	NA	NA	NA
TRINITY_DN16702_c0_g2	obr:102700804	27.5	1.1e-06	NA	NA	NA	NA	NA	NA	NA	NA	NA
TRINITY_DN16705_c0_g1	csv:101222217	87	1.3e-35	-	aspartate--tRNA ligase	K22503	aspartyl-tRNA synthetase	EC:6.1.1.12	csv00970	Aminoacyl-tRNA biosynthesis	Genetic Information Processing	Translation
TRINITY_DN16708_c0_g1	ini:109179069	55.1	2.5e-18	NA	NA	NA	NA	NA	NA	NA	NA	NA
TRINITY_DN16715_c0_g1	cann:107858973	57.1	4.6e-08	NA	NA	NA	NA	NA	NA	NA	NA	NA
TRINITY_DN16719_c0_g1	zju:107423457	86.7	2.7e-15	NA	NA	NA	NA	NA	NA	NA	NA	NA
TRINITY_DN16721_c0_g1	lja:Lj3g3v2807960.1	91.5	2.7e-22	Lj3g3v2807960.1	-	K12855	pre-mRNA-processing factor 6	-	lja03040	Spliceosome	Genetic Information Processing	Transcription
TRINITY_DN16726_c0_g1	han:110875762	84.3	1.4e-26	NA	NA	NA	NA	NA	NA	NA	NA	NA
TRINITY_DN16730_c0_g1	nta:107824241	62.6	6e-114	NA	NA	NA	NA	NA	NA	NA	NA	NA
TRINITY_DN16733_c0_g3	zju:107428580	84.3	1.3e-36	-	high affinity nitrate transporter 2.5 isoform X1	K02575	MFS transporter, NNP family, nitrate/nitrite transporter	-	zju00910	Nitrogen metabolism	Metabolism	Energy metabolism
TRINITY_DN16733_c0_g4	sind:105156629	83.2	7.2e-46	-	high affinity nitrate transporter 2.5	K02575	MFS transporter, NNP family, nitrate/nitrite transporter	-	sind00910	Nitrogen metabolism	Metabolism	Energy metabolism
TRINITY_DN16734_c1_g1	nta:107791127	78.6	8.4e-179	NA	NA	NA	NA	NA	NA	NA	NA	NA
TRINITY_DN16739_c0_g1	spen:107020763	38.2	4e-49	NA	NA	NA	NA	NA	NA	NA	NA	NA
TRINITY_DN16741_c0_g1	nnu:104611737	74.4	1.3e-85	NA	NA	NA	NA	NA	NA	NA	NA	NA
TRINITY_DN16743_c0_g1	egu:105041516	38.2	1.8e-155	-	uncharacterized protein LOC105041516	K10581	ubiquitin-conjugating enzyme E2 O	EC:2.3.2.24	egu04120	Ubiquitin mediated proteolysis	Genetic Information Processing	Folding, sorting and degradation
TRINITY_DN16749_c0_g1	nnu:104587894	79.1	8.6e-162	-	indole-3-glycerol phosphate synthase	K01609	indole-3-glycerol phosphate synthase	EC:4.1.1.48	nnu00400	Phenylalanine, tyrosine and tryptophan biosynthesis	Metabolism	Amino acid metabolism
TRINITY_DN16752_c0_g2	gmx:100777389	98.7	1.5e-39	-	NADH dehydrogenase [ubiquinone] flavoprotein 1	K03942	NADH dehydrogenase (ubiquinone) flavoprotein 1	EC:1.6.5.3 1.6.99.3	gmx00190	Oxidative phosphorylation	Metabolism	Energy metabolism
TRINITY_DN16754_c0_g1	csl:COCSUDRAFT_47721	61.3	2.4e-32	NA	NA	NA	NA	NA	NA	NA	NA	NA
TRINITY_DN16754_c0_g3	csl:COCSUDRAFT_47721	50.5	5.3e-24	NA	NA	NA	NA	NA	NA	NA	NA	NA
TRINITY_DN16754_c0_g4	mpp:MICPUCDRAFT_35134	65.8	2.7e-25	NA	NA	NA	NA	NA	NA	NA	NA	NA
TRINITY_DN16765_c0_g1	csat:104746010	45.6	1.6e-11	-	60S ribosomal protein L19-2	K02885	large subunit ribosomal protein L19e	-	csat03010	Ribosome	Genetic Information Processing	Translation
TRINITY_DN16767_c0_g1	smo:SELMODRAFT_414635	32.2	1.1e-09	NA	NA	NA	NA	NA	NA	NA	NA	NA
TRINITY_DN16770_c0_g2	tcc:18607332	74.1	8.9e-138	NA	NA	NA	NA	NA	NA	NA	NA	NA
TRINITY_DN16773_c0_g1	lang:109339947	95.9	1.4e-33	NA	NA	NA	NA	NA	NA	NA	NA	NA
TRINITY_DN16775_c0_g1	ini:109167674	97.8	6.1e-77	-	ubiquitin-conjugating enzyme E2 28-like	K06689	ubiquitin-conjugating enzyme E2 D	EC:2.3.2.23	ini04141	Protein processing in endoplasmic reticulum	Genetic Information Processing	Folding, sorting and degradation
TRINITY_DN16775_c0_g1	ini:109167674	97.8	6.1e-77	-	ubiquitin-conjugating enzyme E2 28-like	K06689	ubiquitin-conjugating enzyme E2 D	EC:2.3.2.23	ini04120	Ubiquitin mediated proteolysis	Genetic Information Processing	Folding, sorting and degradation
TRINITY_DN16776_c1_g1	dct:110093534	66.4	1.1e-46	-	uncharacterized protein OsI_027940-like	K15730	cytosolic prostaglandin-E synthase	EC:5.3.99.3	dct00590	Arachidonic acid metabolism	Metabolism	Lipid metabolism
TRINITY_DN1677_c0_g1	osa:4341790	100	6.8e-37	-	glycine cleavage system H protein 2	K02437	glycine cleavage system H protein	-	osa00630	Glyoxylate and dicarboxylate metabolism	Metabolism	Carbohydrate metabolism
TRINITY_DN1677_c0_g1	osa:4341790	100	6.8e-37	-	glycine cleavage system H protein 2	K02437	glycine cleavage system H protein	-	osa00260	Glycine, serine and threonine metabolism	Metabolism	Amino acid metabolism
TRINITY_DN16782_c0_g1	sot:102604901	75.7	0	NA	NA	NA	NA	NA	NA	NA	NA	NA
TRINITY_DN16783_c0_g2	soe:110790240	36.8	1.5e-13	-	mitogen-activated protein kinase 3	K20536	mitogen-activated protein kinase 3	EC:2.7.11.24	soe04016	MAPK signaling pathway - plant	Environmental Information Processing	Signal transduction
TRINITY_DN16788_c0_g2	sot:102597132	57.8	9.1e-24	NA	NA	NA	NA	NA	NA	NA	NA	NA
TRINITY_DN16798_c0_g3	dosa:Os05t0445500-01	64.9	2.1e-18	Os05g0445500	Similar to Acidic ribosomal protein (Fragment).	K02943	large subunit ribosomal protein LP2	-	dosa03010	Ribosome	Genetic Information Processing	Translation
TRINITY_DN16801_c0_g1	vvi:100253619	62.3	8.6e-45	-	peroxisomal membrane protein PEX14	K13343	peroxin-14	-	vvi04146	Peroxisome	Cellular Processes	Transport and catabolism
TRINITY_DN16801_c0_g2	aly:ARALYDRAFT_496464	56	1e-16	-	hypothetical protein	K13343	peroxin-14	-	aly04146	Peroxisome	Cellular Processes	Transport and catabolism
TRINITY_DN16803_c0_g1	gmx:100527647	100	8.7e-76	-	uncharacterized LOC100527647	K02966	small subunit ribosomal protein S19e	-	gmx03010	Ribosome	Genetic Information Processing	Translation
TRINITY_DN16808_c0_g1	csv:101220719	29.1	1.1e-19	GA2ox5	gibberellin 2-beta-dioxygenase 8	K04125	gibberellin 2-oxidase	EC:1.14.11.13	csv00904	Diterpenoid biosynthesis	Metabolism	Metabolism of terpenoids and polyketides
TRINITY_DN16812_c0_g2	var:108319340	67	2.4e-31	NA	NA	NA	NA	NA	NA	NA	NA	NA
TRINITY_DN16816_c0_g2	zju:107406650	73.6	3.1e-102	-	39S ribosomal protein L22	K02890	large subunit ribosomal protein L22	-	zju03010	Ribosome	Genetic Information Processing	Translation
TRINITY_DN16818_c0_g1	fve:101306639	56.2	2e-167	NA	NA	NA	NA	NA	NA	NA	NA	NA
TRINITY_DN16827_c0_g1	bvg:104903272	61.5	1.9e-21	NA	NA	NA	NA	NA	NA	NA	NA	NA
TRINITY_DN16827_c0_g3	apro:F751_1339	37.6	9.1e-60	NA	NA	NA	NA	NA	NA	NA	NA	NA
TRINITY_DN16839_c0_g1	lja:Lj3g3v3639610.1	94.2	3.7e-52	NA	NA	NA	NA	NA	NA	NA	NA	NA
TRINITY_DN16840_c1_g1	ccp:CHC_T00008748001	81.2	2.2e-30	-	Translation initiation factor eIF4	K03257	translation initiation factor 4A	-	ccp03013	RNA transport	Genetic Information Processing	Translation
TRINITY_DN16844_c0_g1	egu:105045751	66.7	2.6e-34	-	60S ribosomal protein L35	K02918	large subunit ribosomal protein L35e	-	egu03010	Ribosome	Genetic Information Processing	Translation
TRINITY_DN16844_c0_g2	egu:105045751	69.9	1.2e-36	-	60S ribosomal protein L35	K02918	large subunit ribosomal protein L35e	-	egu03010	Ribosome	Genetic Information Processing	Translation
TRINITY_DN16845_c0_g1	smo:SELMODRAFT_97336	83.1	3.5e-37	-	hypothetical protein	K12828	splicing factor 3B subunit 1	-	smo03040	Spliceosome	Genetic Information Processing	Transcription
TRINITY_DN16849_c0_g2	ath:AT1G44790	55.2	2.3e-41	-	ChaC-like family protein	K22596	gamma-glutamylcyclotransferase, plant	EC:4.3.2.9	ath00480	Glutathione metabolism	Metabolism	Metabolism of other amino acids
TRINITY_DN16861_c0_g1	cic:CICLE_v10013157mg	88	2.7e-29	-	hypothetical protein	K02979	small subunit ribosomal protein S28e	-	cic03010	Ribosome	Genetic Information Processing	Translation
TRINITY_DN16866_c0_g2	rcu:8272550	79.5	1e-36	NA	NA	NA	NA	NA	NA	NA	NA	NA
TRINITY_DN16870_c0_g1	cit:102625262	77.9	4.4e-59	-	mitogen-activated protein kinase kinase 2	K20603	mitogen-activated protein kinase kinase 2	EC:2.7.12.2	cit04016	MAPK signaling pathway - plant	Environmental Information Processing	Signal transduction
TRINITY_DN16879_c0_g1	soe:110789872	60.8	1.3e-37	-	40S ribosomal protein S19-1	K02966	small subunit ribosomal protein S19e	-	soe03010	Ribosome	Genetic Information Processing	Translation
TRINITY_DN1687_c0_g1	zju:107417435	81.2	5.5e-27	NA	NA	NA	NA	NA	NA	NA	NA	NA
TRINITY_DN16886_c0_g1	vcn:VOLCADRAFT_104090	46.1	1.2e-14	NA	NA	NA	NA	NA	NA	NA	NA	NA
TRINITY_DN16887_c0_g1	vvi:100254222	73.8	1.4e-182	-	transcription initiation factor TFIID subunit 5	K03130	transcription initiation factor TFIID subunit 5	-	vvi03022	Basal transcription factors	Genetic Information Processing	Transcription
TRINITY_DN16888_c0_g2	ini:109155938	71.2	2.5e-183	NA	NA	NA	NA	NA	NA	NA	NA	NA
TRINITY_DN1688_c0_g1	mng:MNEG_4129	64.1	6.7e-17	-	60S acidic ribosomal protein P1	K02942	large subunit ribosomal protein LP1	-	mng03010	Ribosome	Genetic Information Processing	Translation
TRINITY_DN16890_c0_g1	ini:109189121	57	4e-38	NA	NA	NA	NA	NA	NA	NA	NA	NA
TRINITY_DN16895_c0_g1	nta:107780004	25.1	2.4e-10	-	polyadenylate-binding protein 3-like	K13126	polyadenylate-binding protein	-	nta03013	RNA transport	Genetic Information Processing	Translation
TRINITY_DN16895_c0_g1	nta:107780004	25.1	2.4e-10	-	polyadenylate-binding protein 3-like	K13126	polyadenylate-binding protein	-	nta03015	mRNA surveillance pathway	Genetic Information Processing	Translation
TRINITY_DN16895_c0_g1	nta:107780004	25.1	2.4e-10	-	polyadenylate-binding protein 3-like	K13126	polyadenylate-binding protein	-	nta03018	RNA degradation	Genetic Information Processing	Folding, sorting and degradation
TRINITY_DN16898_c0_g2	gmx:100789177	100	5.1e-37	-	nuclear pore complex protein NUP98A-like	K14297	nuclear pore complex protein Nup98-Nup96	-	gmx03013	RNA transport	Genetic Information Processing	Translation
TRINITY_DN16900_c0_g2	gmx:100791863	100	4.7e-15	-	protein translation factor SUI1 homolog 1	K03113	translation initiation factor 1	-	gmx03013	RNA transport	Genetic Information Processing	Translation
TRINITY_DN16903_c0_g1	nta:107784110	72.7	5.3e-44	-	probable calcium-binding protein CML36	K13448	calcium-binding protein CML	-	nta04626	Plant-pathogen interaction	Organismal Systems	Environmental adaptation
TRINITY_DN16922_c0_g1	mdm:103451319	58.1	4.1e-23	NA	NA	NA	NA	NA	NA	NA	NA	NA
TRINITY_DN16922_c0_g5	adu:107466525	48.8	2.3e-14	-	LOW QUALITY PROTEIN: DNA-directed RNA polymerase II subunit 1-like	K03006	DNA-directed RNA polymerase II subunit RPB1	EC:2.7.7.6	adu00230	Purine metabolism	Metabolism	Nucleotide metabolism
TRINITY_DN16922_c0_g5	adu:107466525	48.8	2.3e-14	-	LOW QUALITY PROTEIN: DNA-directed RNA polymerase II subunit 1-like	K03006	DNA-directed RNA polymerase II subunit RPB1	EC:2.7.7.6	adu00240	Pyrimidine metabolism	Metabolism	Nucleotide metabolism
TRINITY_DN16922_c0_g5	adu:107466525	48.8	2.3e-14	-	LOW QUALITY PROTEIN: DNA-directed RNA polymerase II subunit 1-like	K03006	DNA-directed RNA polymerase II subunit RPB1	EC:2.7.7.6	adu03020	RNA polymerase	Genetic Information Processing	Transcription
TRINITY_DN16923_c0_g1	tcc:18588166	58.3	5e-18	NA	NA	NA	NA	NA	NA	NA	NA	NA
TRINITY_DN16926_c0_g1	sly:101260346	74.8	1.8e-84	NA	NA	NA	NA	NA	NA	NA	NA	NA
TRINITY_DN16933_c0_g1	sind:105160482	57.4	1e-27	NA	NA	NA	NA	NA	NA	NA	NA	NA
TRINITY_DN16941_c0_g1	vvi:100244992	76.5	5.7e-42	NA	NA	NA	NA	NA	NA	NA	NA	NA
TRINITY_DN16941_c0_g2	nnu:104606049	77.9	7.6e-157	NA	NA	NA	NA	NA	NA	NA	NA	NA
TRINITY_DN16945_c0_g1	mdm:103412001	89	2e-33	NA	NA	NA	NA	NA	NA	NA	NA	NA
TRINITY_DN16950_c0_g2	gmx:100101902	50	1.7e-11	IF7GT	UDP-glucose:isoflavone 7-O-glucosyltransferase	K13263	isoflavone 7-O-glucosyltransferase	EC:2.4.1.170	gmx00943	Isoflavonoid biosynthesis	Metabolism	Biosynthesis of other secondary metabolites
TRINITY_DN16957_c0_g2	mcha:111006374	38.8	1.2e-16	NA	NA	NA	NA	NA	NA	NA	NA	NA
TRINITY_DN16959_c3_g1	tcc:18603214	74.5	1.6e-70	-	cryptochrome-1	K12119	cryptochrome 2	-	tcc04712	Circadian rhythm - plant	Organismal Systems	Environmental adaptation
TRINITY_DN16960_c0_g2	jcu:105645257	64.1	3e-16	-	zeatin O-glucosyltransferase	K13495	cis-zeatin O-glucosyltransferase	EC:2.4.1.215	jcu00908	Zeatin biosynthesis	Metabolism	Metabolism of terpenoids and polyketides
TRINITY_DN16976_c0_g2	bdi:100822834	97.9	5.6e-45	-	sm-like protein LSM3B	K12622	U6 snRNA-associated Sm-like protein LSm3	-	bdi03040	Spliceosome	Genetic Information Processing	Transcription
TRINITY_DN16976_c0_g2	bdi:100822834	97.9	5.6e-45	-	sm-like protein LSM3B	K12622	U6 snRNA-associated Sm-like protein LSm3	-	bdi03018	RNA degradation	Genetic Information Processing	Folding, sorting and degradation
TRINITY_DN16978_c3_g4	sita:101771169	90	2e-35	-	vacuolar-sorting receptor 1	K01859	chalcone isomerase	EC:5.5.1.6	sita00941	Flavonoid biosynthesis	Metabolism	Biosynthesis of other secondary metabolites
TRINITY_DN16979_c0_g1	hbr:110670867	80.6	4e-53	-	S-adenosylmethionine decarboxylase proenzyme 4-like	K01611	S-adenosylmethionine decarboxylase	EC:4.1.1.50	hbr00270	Cysteine and methionine metabolism	Metabolism	Amino acid metabolism
TRINITY_DN16979_c0_g1	hbr:110670867	80.6	4e-53	-	S-adenosylmethionine decarboxylase proenzyme 4-like	K01611	S-adenosylmethionine decarboxylase	EC:4.1.1.50	hbr00330	Arginine and proline metabolism	Metabolism	Amino acid metabolism
TRINITY_DN16983_c0_g1	ccaj:109790389	40	1.2e-72	NA	NA	NA	NA	NA	NA	NA	NA	NA
TRINITY_DN16986_c0_g1	han:110889124	56.2	7e-42	-	histidine-containing phosphotransfer protein 1-like isoform X1	K14490	histidine-containing phosphotransfer peotein	-	han04075	Plant hormone signal transduction	Environmental Information Processing	Signal transduction
TRINITY_DN16989_c0_g2	nta:107831756	71	7.9e-227	NPR1	regulatory protein NPR1-like	K14508	regulatory protein NPR1	-	nta04075	Plant hormone signal transduction	Environmental Information Processing	Signal transduction
TRINITY_DN16990_c0_g1	vvi:100252615	59.1	1.4e-93	NA	NA	NA	NA	NA	NA	NA	NA	NA
TRINITY_DN16995_c0_g1	cann:107849274	32.3	6.6e-11	NA	NA	NA	NA	NA	NA	NA	NA	NA
TRINITY_DN16999_c0_g8	atr:18447524	60	5.9e-11	-	fructose-bisphosphate aldolase 5	K01623	fructose-bisphosphate aldolase, class I	EC:4.1.2.13	atr00010	Glycolysis / Gluconeogenesis	Metabolism	Carbohydrate metabolism
TRINITY_DN16999_c0_g8	atr:18447524	60	5.9e-11	-	fructose-bisphosphate aldolase 5	K01623	fructose-bisphosphate aldolase, class I	EC:4.1.2.13	atr00030	Pentose phosphate pathway	Metabolism	Carbohydrate metabolism
TRINITY_DN16999_c0_g8	atr:18447524	60	5.9e-11	-	fructose-bisphosphate aldolase 5	K01623	fructose-bisphosphate aldolase, class I	EC:4.1.2.13	atr00051	Fructose and mannose metabolism	Metabolism	Carbohydrate metabolism
TRINITY_DN16999_c0_g8	atr:18447524	60	5.9e-11	-	fructose-bisphosphate aldolase 5	K01623	fructose-bisphosphate aldolase, class I	EC:4.1.2.13	atr00710	Carbon fixation in photosynthetic organisms	Metabolism	Energy metabolism
TRINITY_DN17000_c0_g1	vvi:100248926	69.5	2.6e-157	NA	NA	NA	NA	NA	NA	NA	NA	NA
TRINITY_DN17004_c0_g4	pvu:PHAVU_001G120300g	44.9	3.9e-07	NA	NA	NA	NA	NA	NA	NA	NA	NA
TRINITY_DN17007_c0_g2	dct:110111182	57.1	4.4e-07	NA	NA	NA	NA	NA	NA	NA	NA	NA
TRINITY_DN17009_c0_g1	sind:105158804	80	2.9e-172	-	cysteine synthase	K01738	cysteine synthase	EC:2.5.1.47	sind00920	Sulfur metabolism	Metabolism	Energy metabolism
TRINITY_DN17009_c0_g1	sind:105158804	80	2.9e-172	-	cysteine synthase	K01738	cysteine synthase	EC:2.5.1.47	sind00270	Cysteine and methionine metabolism	Metabolism	Amino acid metabolism
TRINITY_DN17010_c0_g1	bvg:104890341	74.1	1.2e-62	-	60S ribosomal protein L19-3	K02885	large subunit ribosomal protein L19e	-	bvg03010	Ribosome	Genetic Information Processing	Translation
TRINITY_DN17010_c0_g2	bvg:104890341	70.9	1.3e-61	-	60S ribosomal protein L19-3	K02885	large subunit ribosomal protein L19e	-	bvg03010	Ribosome	Genetic Information Processing	Translation
TRINITY_DN17010_c0_g3	nta:107789275	69.9	3.7e-34	-	60S ribosomal protein L19-3-like	K02885	large subunit ribosomal protein L19e	-	nta03010	Ribosome	Genetic Information Processing	Translation
TRINITY_DN17012_c0_g1	osa:4341282	98.6	2.9e-55	-	40S ribosomal protein S24-1	K02974	small subunit ribosomal protein S24e	-	osa03010	Ribosome	Genetic Information Processing	Translation
TRINITY_DN17014_c0_g1	ini:109187729	83.3	6e-17	-	adenosine kinase 2-like	K00856	adenosine kinase	EC:2.7.1.20	ini00230	Purine metabolism	Metabolism	Nucleotide metabolism
TRINITY_DN17023_c0_g1	soe:110788232	87.9	5.1e-52	-	60S ribosomal protein L23	K02894	large subunit ribosomal protein L23e	-	soe03010	Ribosome	Genetic Information Processing	Translation
TRINITY_DN17026_c1_g2	tcc:18603524	65.3	2e-33	-	60S ribosomal protein L22-3	K02891	large subunit ribosomal protein L22e	-	tcc03010	Ribosome	Genetic Information Processing	Translation
TRINITY_DN17026_c1_g6	osa:4344261	100	7.1e-66	-	60S ribosomal protein L22-2	K02891	large subunit ribosomal protein L22e	-	osa03010	Ribosome	Genetic Information Processing	Translation
TRINITY_DN17028_c0_g1	gra:105775510	59.7	3.3e-14	-	uncharacterized LOC105775510	K00963	UTP--glucose-1-phosphate uridylyltransferase	EC:2.7.7.9	gra00040	Pentose and glucuronate interconversions	Metabolism	Carbohydrate metabolism
TRINITY_DN17028_c0_g1	gra:105775510	59.7	3.3e-14	-	uncharacterized LOC105775510	K00963	UTP--glucose-1-phosphate uridylyltransferase	EC:2.7.7.9	gra00052	Galactose metabolism	Metabolism	Carbohydrate metabolism
TRINITY_DN17028_c0_g1	gra:105775510	59.7	3.3e-14	-	uncharacterized LOC105775510	K00963	UTP--glucose-1-phosphate uridylyltransferase	EC:2.7.7.9	gra00500	Starch and sucrose metabolism	Metabolism	Carbohydrate metabolism
TRINITY_DN17028_c0_g1	gra:105775510	59.7	3.3e-14	-	uncharacterized LOC105775510	K00963	UTP--glucose-1-phosphate uridylyltransferase	EC:2.7.7.9	gra00520	Amino sugar and nucleotide sugar metabolism	Metabolism	Carbohydrate metabolism
TRINITY_DN17028_c0_g5	pda:103707976	74.7	7.9e-35	-	uncharacterized LOC103707976	K01191	alpha-mannosidase	EC:3.2.1.24	pda00511	Other glycan degradation	Metabolism	Glycan biosynthesis and metabolism
TRINITY_DN17028_c0_g9	lang:109359716	54.1	3.1e-20	NA	NA	NA	NA	NA	NA	NA	NA	NA
TRINITY_DN17035_c0_g3	cit:102609894	66.7	3.2e-21	-	folylpolyglutamate synthase isoform X2	K01930	folylpolyglutamate synthase	EC:6.3.2.17	cit00790	Folate biosynthesis	Metabolism	Metabolism of cofactors and vitamins
TRINITY_DN17036_c0_g1	zju:107411312	39	1.4e-45	-	LOW QUALITY PROTEIN: uncharacterized protein LOC107411312	K01365	cathepsin L	EC:3.4.22.15	zju04145	Phagosome	Cellular Processes	Transport and catabolism
TRINITY_DN17039_c0_g2	spen:107013994	67.4	7.8e-124	-	hydroxyphenylpyruvate reductase-like	K15919	hydroxypyruvate reductase 2	-	spen00630	Glyoxylate and dicarboxylate metabolism	Metabolism	Carbohydrate metabolism
TRINITY_DN17039_c0_g2	spen:107013994	67.4	7.8e-124	-	hydroxyphenylpyruvate reductase-like	K15919	hydroxypyruvate reductase 2	-	spen00260	Glycine, serine and threonine metabolism	Metabolism	Amino acid metabolism
TRINITY_DN17040_c0_g1	mtr:MTR_4g099130	71.9	2e-68	NA	NA	NA	NA	NA	NA	NA	NA	NA
TRINITY_DN17045_c0_g1	cit:102621035	57.4	1e-53	-	probable ribosomal protein S11	K02948	small subunit ribosomal protein S11	-	cit03010	Ribosome	Genetic Information Processing	Translation
TRINITY_DN17048_c0_g2	lang:109333668	73.1	1.8e-87	NA	NA	NA	NA	NA	NA	NA	NA	NA
TRINITY_DN17054_c0_g2	vvi:100248931	63.3	9.3e-66	-	29 kDa ribonucleoprotein A	K13126	polyadenylate-binding protein	-	vvi03013	RNA transport	Genetic Information Processing	Translation
TRINITY_DN17054_c0_g2	vvi:100248931	63.3	9.3e-66	-	29 kDa ribonucleoprotein A	K13126	polyadenylate-binding protein	-	vvi03015	mRNA surveillance pathway	Genetic Information Processing	Translation
TRINITY_DN17054_c0_g2	vvi:100248931	63.3	9.3e-66	-	29 kDa ribonucleoprotein A	K13126	polyadenylate-binding protein	-	vvi03018	RNA degradation	Genetic Information Processing	Folding, sorting and degradation
TRINITY_DN17055_c0_g3	gmx:100786439	100	1.8e-33	-	ras-related protein RABE1c	K07901	Ras-related protein Rab-8A	-	gmx04144	Endocytosis	Cellular Processes	Transport and catabolism
TRINITY_DN17056_c0_g1	vvi:100262452	66.5	3.7e-99	-	thymidine kinase	K00857	thymidine kinase	EC:2.7.1.21	vvi00240	Pyrimidine metabolism	Metabolism	Nucleotide metabolism
TRINITY_DN17065_c0_g1	gmx:100802667	99.2	4.1e-69	-	60S ribosomal protein L32-1-like	K02912	large subunit ribosomal protein L32e	-	gmx03010	Ribosome	Genetic Information Processing	Translation
TRINITY_DN17072_c0_g1	rcu:8268668	85.1	5.6e-90	-	clathrin interactor EPSIN 3 isoform X1	K12471	epsin	-	rcu04144	Endocytosis	Cellular Processes	Transport and catabolism
TRINITY_DN17073_c0_g1	sly:101262307	89.3	1.2e-81	NA	NA	NA	NA	NA	NA	NA	NA	NA
TRINITY_DN17079_c0_g1	mcha:111006903	92.4	4.3e-27	-	40S ribosomal protein S28-1-like	K02979	small subunit ribosomal protein S28e	-	mcha03010	Ribosome	Genetic Information Processing	Translation
TRINITY_DN17080_c0_g1	sot:102596445	64.8	0	NA	NA	NA	NA	NA	NA	NA	NA	NA
TRINITY_DN17080_c0_g2	nto:104100209	81.6	1.1e-118	NA	NA	NA	NA	NA	NA	NA	NA	NA
TRINITY_DN17084_c0_g1	pper:18769930	65.7	9.1e-34	-	U1 small nuclear ribonucleoprotein 70 kDa	K11093	U1 small nuclear ribonucleoprotein 70kDa	-	pper03040	Spliceosome	Genetic Information Processing	Transcription
TRINITY_DN17084_c0_g2	mcha:111013144	39	3.7e-06	-	U1 small nuclear ribonucleoprotein 70 kDa	K11093	U1 small nuclear ribonucleoprotein 70kDa	-	mcha03040	Spliceosome	Genetic Information Processing	Transcription
TRINITY_DN17086_c1_g2	osa:4339021	100	1.5e-69	-	ras-related protein RABE1c isoform X1	K07901	Ras-related protein Rab-8A	-	osa04144	Endocytosis	Cellular Processes	Transport and catabolism
TRINITY_DN17086_c1_g3	gmx:100816795	100	2.5e-27	-	ras-related protein RABE1c-like	K07901	Ras-related protein Rab-8A	-	gmx04144	Endocytosis	Cellular Processes	Transport and catabolism
TRINITY_DN17095_c0_g1	vvi:100250257	78.7	7.3e-214	WDR3	WD repeat-containing protein 3	K14556	U3 small nucleolar RNA-associated protein 12	-	vvi03008	Ribosome biogenesis in eukaryotes	Genetic Information Processing	Translation
TRINITY_DN17095_c0_g2	hbr:110666271	76.4	8.4e-52	-	WD repeat-containing protein 3	K14556	U3 small nucleolar RNA-associated protein 12	-	hbr03008	Ribosome biogenesis in eukaryotes	Genetic Information Processing	Translation
TRINITY_DN1709_c0_g1	osa:4335450	98.5	1.2e-31	-	NADH dehydrogenase [ubiquinone] 1 alpha subcomplex subunit 2	K03946	NADH dehydrogenase (ubiquinone) 1 alpha subcomplex subunit 2	-	osa00190	Oxidative phosphorylation	Metabolism	Energy metabolism
TRINITY_DN17102_c0_g2	csv:101220451	84	3.6e-46	NA	NA	NA	NA	NA	NA	NA	NA	NA
TRINITY_DN17102_c0_g3	sot:102600589	66.8	3.8e-74	NA	NA	NA	NA	NA	NA	NA	NA	NA
TRINITY_DN17103_c0_g1	vvi:100246732	85.9	4e-71	-	protein plastid transcriptionally active 16	K13171	serine/arginine repetitive matrix protein 1	-	vvi03013	RNA transport	Genetic Information Processing	Translation
TRINITY_DN17103_c0_g1	vvi:100246732	85.9	4e-71	-	protein plastid transcriptionally active 16	K13171	serine/arginine repetitive matrix protein 1	-	vvi03015	mRNA surveillance pathway	Genetic Information Processing	Translation
TRINITY_DN17114_c1_g1	fve:101293775	93	3e-18	-	40S ribosomal protein S27-2-like	K02978	small subunit ribosomal protein S27e	-	fve03010	Ribosome	Genetic Information Processing	Translation
TRINITY_DN17117_c0_g1	gmx:100791354	79.6	1.4e-20	NA	NA	NA	NA	NA	NA	NA	NA	NA
TRINITY_DN17118_c0_g1	cic:CICLE_v10017858mg	64	6.5e-24	NA	NA	NA	NA	NA	NA	NA	NA	NA
TRINITY_DN17118_c0_g2	cic:CICLE_v10017858mg	75.3	9.6e-63	NA	NA	NA	NA	NA	NA	NA	NA	NA
TRINITY_DN17119_c0_g1	gmx:100527333	98.8	5.4e-133	NA	NA	NA	NA	NA	NA	NA	NA	NA
TRINITY_DN17120_c0_g1	mtr:MTR_2g020000	91	6e-72	NA	NA	NA	NA	NA	NA	NA	NA	NA
TRINITY_DN17124_c0_g2	gmx:100784101	94.5	2e-40	-	60S ribosomal protein L6	K02934	large subunit ribosomal protein L6e	-	gmx03010	Ribosome	Genetic Information Processing	Translation
TRINITY_DN17124_c0_g3	gmx:100499766	100	9.3e-47	-	uncharacterized LOC100499766	K02934	large subunit ribosomal protein L6e	-	gmx03010	Ribosome	Genetic Information Processing	Translation
TRINITY_DN17129_c0_g1	ghi:107963072	32.5	1.4e-22	NA	NA	NA	NA	NA	NA	NA	NA	NA
TRINITY_DN17130_c0_g2	nto:104106504	81.7	2.8e-108	-	derlin-1-like	K13989	Derlin-2/3	-	nto04141	Protein processing in endoplasmic reticulum	Genetic Information Processing	Folding, sorting and degradation
TRINITY_DN17134_c0_g1	han:110867837	91.2	3.7e-82	-	uncharacterized protein LOC110867837	K02895	large subunit ribosomal protein L24	-	han03010	Ribosome	Genetic Information Processing	Translation
TRINITY_DN17135_c0_g1	jcu:105632005	62.2	2.7e-22	NA	NA	NA	NA	NA	NA	NA	NA	NA
TRINITY_DN17135_c1_g9	jcu:105645421	36.6	1.9e-76	-	glucan endo-1	K19891	glucan endo-1,3-beta-glucosidase 1/2/3	EC:3.2.1.39	jcu00500	Starch and sucrose metabolism	Metabolism	Carbohydrate metabolism
TRINITY_DN17136_c0_g1	nta:107775815	68.7	1.2e-140	-	ribokinase-like	K00852	ribokinase	EC:2.7.1.15	nta00030	Pentose phosphate pathway	Metabolism	Carbohydrate metabolism
TRINITY_DN17137_c0_g1	bvg:104905493	100	6.1e-15	-	ubiquitin-related modifier 1 homolog 1	K12161	ubiquitin related modifier 1	-	bvg04122	Sulfur relay system	Genetic Information Processing	Folding, sorting and degradation
TRINITY_DN17145_c1_g3	nta:107778777	62.1	4.3e-129	NA	NA	NA	NA	NA	NA	NA	NA	NA
TRINITY_DN17146_c0_g1	pmum:103330372	95.7	7.1e-77	-	cytochrome c1-2	K00413	ubiquinol-cytochrome c reductase cytochrome c1 subunit	-	pmum00190	Oxidative phosphorylation	Metabolism	Energy metabolism
TRINITY_DN17146_c0_g5	vvi:100250724	80.7	2.7e-29	-	cytochrome c1-2	K00413	ubiquinol-cytochrome c reductase cytochrome c1 subunit	-	vvi00190	Oxidative phosphorylation	Metabolism	Energy metabolism
TRINITY_DN17148_c0_g1	mcha:111013017	100	9.1e-10	-	DNA replication licensing factor MCM5	K02209	DNA replication licensing factor MCM5	EC:3.6.4.12	mcha03030	DNA replication	Genetic Information Processing	Replication and repair
TRINITY_DN17148_c0_g2	ini:109166076	85.7	0	-	DNA replication licensing factor MCM5	K02209	DNA replication licensing factor MCM5	EC:3.6.4.12	ini03030	DNA replication	Genetic Information Processing	Replication and repair
TRINITY_DN17151_c0_g1	vvi:100852778	93.3	9.9e-61	-	60S ribosomal protein L15-1	K02877	large subunit ribosomal protein L15e	-	vvi03010	Ribosome	Genetic Information Processing	Translation
TRINITY_DN17151_c0_g10	cit:102623164	69.6	5.6e-48	-	60S ribosomal protein L15	K02877	large subunit ribosomal protein L15e	-	cit03010	Ribosome	Genetic Information Processing	Translation
TRINITY_DN17151_c0_g2	mus:103983523	75.5	1.7e-69	-	60S ribosomal protein L15-1	K02877	large subunit ribosomal protein L15e	-	mus03010	Ribosome	Genetic Information Processing	Translation
TRINITY_DN17151_c0_g3	rcu:8267726	77	9.3e-52	-	60S ribosomal protein L15-1	K02877	large subunit ribosomal protein L15e	-	rcu03010	Ribosome	Genetic Information Processing	Translation
TRINITY_DN17151_c0_g4	gmx:100798324	100	1e-37	-	60S ribosomal protein L15-1	K02877	large subunit ribosomal protein L15e	-	gmx03010	Ribosome	Genetic Information Processing	Translation
TRINITY_DN17151_c0_g5	osa:4333387	95.7	1.3e-86	-	60S ribosomal protein L15	K02877	large subunit ribosomal protein L15e	-	osa03010	Ribosome	Genetic Information Processing	Translation
TRINITY_DN17151_c0_g6	gmx:100810310	99	2e-53	-	60S ribosomal protein L15-1	K02877	large subunit ribosomal protein L15e	-	gmx03010	Ribosome	Genetic Information Processing	Translation
TRINITY_DN17151_c0_g7	jcu:105648627	60.9	5.7e-66	-	60S ribosomal protein L15	K02877	large subunit ribosomal protein L15e	-	jcu03010	Ribosome	Genetic Information Processing	Translation
TRINITY_DN17151_c0_g8	gmx:100810310	99.5	2.4e-115	-	60S ribosomal protein L15-1	K02877	large subunit ribosomal protein L15e	-	gmx03010	Ribosome	Genetic Information Processing	Translation
TRINITY_DN17151_c0_g9	mus:103983523	77.1	1.4e-65	-	60S ribosomal protein L15-1	K02877	large subunit ribosomal protein L15e	-	mus03010	Ribosome	Genetic Information Processing	Translation
TRINITY_DN17154_c0_g2	smo:SELMODRAFT_100761	45.7	2.4e-11	ARPC2-2	hypothetical protein	K05758	actin related protein 2/3 complex, subunit 2	-	smo04144	Endocytosis	Cellular Processes	Transport and catabolism
TRINITY_DN17155_c0_g1	sind:105178562	74.6	6.9e-101	NA	NA	NA	NA	NA	NA	NA	NA	NA
TRINITY_DN17161_c0_g6	cic:CICLE_v10014038mg	36.6	3e-16	-	hypothetical protein	K10683	BRCA1-associated RING domain protein 1	-	cic03440	Homologous recombination	Genetic Information Processing	Replication and repair
TRINITY_DN17162_c0_g1	osa:4343919	66.9	3.3e-47	-	uncharacterized protein LOC4343919 isoform X1	K13941	2-amino-4-hydroxy-6-hydroxymethyldihydropteridine diphosphokinase / dihydropteroate synthase	EC:2.7.6.3 2.5.1.15	osa00790	Folate biosynthesis	Metabolism	Metabolism of cofactors and vitamins
TRINITY_DN17163_c0_g2	gra:105769028	82.9	2.6e-230	NA	NA	NA	NA	NA	NA	NA	NA	NA
TRINITY_DN17163_c0_g4	cam:101496797	84.6	4.4e-63	NA	NA	NA	NA	NA	NA	NA	NA	NA
TRINITY_DN17164_c2_g3	adu:107483111	76	6.9e-118	-	regulatory protein NPR3	K14508	regulatory protein NPR1	-	adu04075	Plant hormone signal transduction	Environmental Information Processing	Signal transduction
TRINITY_DN17164_c2_g5	vvi:100247744	69	6.6e-111	-	BTB/POZ domain and ankyrin repeat-containing protein NPR2	K14508	regulatory protein NPR1	-	vvi04075	Plant hormone signal transduction	Environmental Information Processing	Signal transduction
TRINITY_DN17165_c1_g3	zju:107430101	92.3	7.3e-135	-	crooked neck-like protein 1	K12869	crooked neck	-	zju03040	Spliceosome	Genetic Information Processing	Transcription
TRINITY_DN17168_c0_g2	gmx:100811654	100	1.8e-31	-	60S ribosomal protein L12-like	K02870	large subunit ribosomal protein L12e	-	gmx03010	Ribosome	Genetic Information Processing	Translation
TRINITY_DN17168_c0_g3	osa:4330425	100	1.2e-86	-	60S ribosomal protein L12-1	K02870	large subunit ribosomal protein L12e	-	osa03010	Ribosome	Genetic Information Processing	Translation
TRINITY_DN17170_c0_g1	cann:107860325	73.7	4e-135	-	peroxidase 10-like	K00430	peroxidase	EC:1.11.1.7	cann00940	Phenylpropanoid biosynthesis	Metabolism	Biosynthesis of other secondary metabolites
TRINITY_DN17174_c0_g1	pavi:110774194	44.2	8.9e-13	NA	NA	NA	NA	NA	NA	NA	NA	NA
TRINITY_DN17175_c0_g1	egr:104449150	54.3	1.5e-57	-	uncharacterized LOC104449150	K03004	DNA-directed RNA polymerase I subunit RPA43	-	egr00230	Purine metabolism	Metabolism	Nucleotide metabolism
TRINITY_DN17175_c0_g1	egr:104449150	54.3	1.5e-57	-	uncharacterized LOC104449150	K03004	DNA-directed RNA polymerase I subunit RPA43	-	egr00240	Pyrimidine metabolism	Metabolism	Nucleotide metabolism
TRINITY_DN17175_c0_g1	egr:104449150	54.3	1.5e-57	-	uncharacterized LOC104449150	K03004	DNA-directed RNA polymerase I subunit RPA43	-	egr03020	RNA polymerase	Genetic Information Processing	Transcription
TRINITY_DN17184_c0_g1	smo:SELMODRAFT_416803	67.5	3.6e-10	NA	NA	NA	NA	NA	NA	NA	NA	NA
TRINITY_DN17185_c0_g2	egu:105057732	72.3	2.5e-46	NA	NA	NA	NA	NA	NA	NA	NA	NA
TRINITY_DN17186_c0_g1	zju:107416231	31	5.9e-12	-	uncharacterized protein LOC107416231	K10745	ribonuclease H2 subunit C	-	zju03030	DNA replication	Genetic Information Processing	Replication and repair
TRINITY_DN17196_c0_g1	csat:104709650	86.9	5.4e-47	-	endoglucanase 19-like	K01179	endoglucanase	EC:3.2.1.4	csat00500	Starch and sucrose metabolism	Metabolism	Carbohydrate metabolism
TRINITY_DN17197_c0_g1	cvr:CHLNCDRAFT_141917	57.8	5e-16	-	hypothetical protein	K06236	collagen, type I, alpha	-	cvr04933	AGE-RAGE signaling pathway in diabetic complications	Human Diseases	Endocrine and metabolic diseases
TRINITY_DN17200_c0_g2	hbr:110661874	55.8	4.5e-08	NA	NA	NA	NA	NA	NA	NA	NA	NA
TRINITY_DN17202_c1_g2	egr:104438376	75.3	3.1e-23	-	fructose-bisphosphate aldolase 6	K01623	fructose-bisphosphate aldolase, class I	EC:4.1.2.13	egr00010	Glycolysis / Gluconeogenesis	Metabolism	Carbohydrate metabolism
TRINITY_DN17202_c1_g2	egr:104438376	75.3	3.1e-23	-	fructose-bisphosphate aldolase 6	K01623	fructose-bisphosphate aldolase, class I	EC:4.1.2.13	egr00030	Pentose phosphate pathway	Metabolism	Carbohydrate metabolism
TRINITY_DN17202_c1_g2	egr:104438376	75.3	3.1e-23	-	fructose-bisphosphate aldolase 6	K01623	fructose-bisphosphate aldolase, class I	EC:4.1.2.13	egr00051	Fructose and mannose metabolism	Metabolism	Carbohydrate metabolism
TRINITY_DN17202_c1_g2	egr:104438376	75.3	3.1e-23	-	fructose-bisphosphate aldolase 6	K01623	fructose-bisphosphate aldolase, class I	EC:4.1.2.13	egr00710	Carbon fixation in photosynthetic organisms	Metabolism	Energy metabolism
TRINITY_DN17204_c2_g1	vvi:100259524	62.5	2.1e-15	-	RNA cytidine acetyltransferase 1	K14521	N-acetyltransferase 10	EC:2.3.1.-	vvi03008	Ribosome biogenesis in eukaryotes	Genetic Information Processing	Translation
TRINITY_DN17207_c0_g1	mng:MNEG_1299	63.7	1.9e-28	-	40S ribosomal protein S10	K02947	small subunit ribosomal protein S10e	-	mng03010	Ribosome	Genetic Information Processing	Translation
TRINITY_DN17207_c0_g2	mng:MNEG_1299	57.6	4e-34	-	40S ribosomal protein S10	K02947	small subunit ribosomal protein S10e	-	mng03010	Ribosome	Genetic Information Processing	Translation
TRINITY_DN17208_c0_g1	mus:103991462	75.5	4.3e-59	-	40S ribosomal protein S15-like	K02958	small subunit ribosomal protein S15e	-	mus03010	Ribosome	Genetic Information Processing	Translation
TRINITY_DN17216_c0_g1	cann:107852877	83.1	1.2e-140	NA	NA	NA	NA	NA	NA	NA	NA	NA
TRINITY_DN17216_c0_g3	vvi:100241769	78.9	4.3e-176	NA	NA	NA	NA	NA	NA	NA	NA	NA
TRINITY_DN17218_c0_g7	sind:105160417	69	9.2e-27	NA	NA	NA	NA	NA	NA	NA	NA	NA
TRINITY_DN17219_c0_g1	cme:CYME_CMT402C	73.2	3.9e-45	-	40S ribosomal protein S17	K02962	small subunit ribosomal protein S17e	-	cme03010	Ribosome	Genetic Information Processing	Translation
TRINITY_DN17219_c0_g2	cme:CYME_CMT402C	71.5	8.5e-45	-	40S ribosomal protein S17	K02962	small subunit ribosomal protein S17e	-	cme03010	Ribosome	Genetic Information Processing	Translation
TRINITY_DN17219_c0_g3	cme:CYME_CMT402C	73.8	1.2e-45	-	40S ribosomal protein S17	K02962	small subunit ribosomal protein S17e	-	cme03010	Ribosome	Genetic Information Processing	Translation
TRINITY_DN17220_c1_g1	brp:103857357	51.5	2.3e-13	-	phospholipase A1-IIbeta-like	K00145	N-acetyl-gamma-glutamyl-phosphate reductase	EC:1.2.1.38	brp00220	Arginine biosynthesis	Metabolism	Amino acid metabolism
TRINITY_DN17220_c1_g2	han:110933352	43.9	2.6e-32	-	phospholipase A(1) DAD1	K16818	phospholipase A1	EC:3.1.1.32	han00564	Glycerophospholipid metabolism	Metabolism	Lipid metabolism
TRINITY_DN17220_c1_g2	han:110933352	43.9	2.6e-32	-	phospholipase A(1) DAD1	K16818	phospholipase A1	EC:3.1.1.32	han00592	alpha-Linolenic acid metabolism	Metabolism	Lipid metabolism
TRINITY_DN17221_c0_g2	vvi:100252042	82.7	0	-	protein transport protein Sec24-like At3g07100	K14007	protein transport protein SEC24	-	vvi04141	Protein processing in endoplasmic reticulum	Genetic Information Processing	Folding, sorting and degradation
TRINITY_DN17225_c0_g2	obr:102709004	38.5	7.3e-06	NA	NA	NA	NA	NA	NA	NA	NA	NA
TRINITY_DN17226_c0_g2	gra:105762801	87.2	7.9e-156	-	DNA-directed RNA polymerases II	K03011	DNA-directed RNA polymerase II subunit RPB3	-	gra00230	Purine metabolism	Metabolism	Nucleotide metabolism
TRINITY_DN17226_c0_g2	gra:105762801	87.2	7.9e-156	-	DNA-directed RNA polymerases II	K03011	DNA-directed RNA polymerase II subunit RPB3	-	gra00240	Pyrimidine metabolism	Metabolism	Nucleotide metabolism
TRINITY_DN17226_c0_g2	gra:105762801	87.2	7.9e-156	-	DNA-directed RNA polymerases II	K03011	DNA-directed RNA polymerase II subunit RPB3	-	gra03020	RNA polymerase	Genetic Information Processing	Transcription
TRINITY_DN17226_c0_g3	pper:18779874	76.6	4e-54	-	plastid division protein CDP1	K01899	succinyl-CoA synthetase alpha subunit	EC:6.2.1.4 6.2.1.5	pper00020	Citrate cycle (TCA cycle)	Metabolism	Carbohydrate metabolism
TRINITY_DN17226_c0_g3	pper:18779874	76.6	4e-54	-	plastid division protein CDP1	K01899	succinyl-CoA synthetase alpha subunit	EC:6.2.1.4 6.2.1.5	pper00640	Propanoate metabolism	Metabolism	Carbohydrate metabolism
TRINITY_DN17227_c0_g2	bdi:100840113	40.4	1.4e-27	-	serine/arginine-rich splicing factor SR30 isoform X1	K12890	splicing factor, arginine/serine-rich 1	-	bdi03040	Spliceosome	Genetic Information Processing	Transcription
TRINITY_DN17228_c0_g1	sind:105175046	88.8	1.3e-153	NA	NA	NA	NA	NA	NA	NA	NA	NA
TRINITY_DN17231_c0_g1	nta:107775369	34.3	6.9e-10	NA	NA	NA	NA	NA	NA	NA	NA	NA
TRINITY_DN17234_c0_g1	jcu:105644310	78.4	1.2e-62	NA	NA	NA	NA	NA	NA	NA	NA	NA
TRINITY_DN17235_c0_g2	mdm:103451977	33.8	3.5e-33	NA	NA	NA	NA	NA	NA	NA	NA	NA
TRINITY_DN17239_c0_g1	cann:107879753	63.9	5.4e-06	NA	NA	NA	NA	NA	NA	NA	NA	NA
TRINITY_DN17242_c1_g1	mdm:103408656	96.5	2.7e-42	-	GDP-mannose 3	K10046	GDP-D-mannose 3', 5'-epimerase	EC:5.1.3.18 5.1.3.-	mdm00053	Ascorbate and aldarate metabolism	Metabolism	Carbohydrate metabolism
TRINITY_DN17242_c1_g1	mdm:103408656	96.5	2.7e-42	-	GDP-mannose 3	K10046	GDP-D-mannose 3', 5'-epimerase	EC:5.1.3.18 5.1.3.-	mdm00520	Amino sugar and nucleotide sugar metabolism	Metabolism	Carbohydrate metabolism
TRINITY_DN17242_c1_g2	ath:AT5G28840	93.9	1e-18	GME	GDP-D-mannose 3',5'-epimerase	K10046	GDP-D-mannose 3', 5'-epimerase	EC:5.1.3.18 5.1.3.-	ath00053	Ascorbate and aldarate metabolism	Metabolism	Carbohydrate metabolism
TRINITY_DN17242_c1_g2	ath:AT5G28840	93.9	1e-18	GME	GDP-D-mannose 3',5'-epimerase	K10046	GDP-D-mannose 3', 5'-epimerase	EC:5.1.3.18 5.1.3.-	ath00520	Amino sugar and nucleotide sugar metabolism	Metabolism	Carbohydrate metabolism
TRINITY_DN17243_c1_g3	gmx:100803962	99.8	6e-281	-	UDP-glucose 6-dehydrogenase 1	K00012	UDPglucose 6-dehydrogenase	EC:1.1.1.22	gmx00040	Pentose and glucuronate interconversions	Metabolism	Carbohydrate metabolism
TRINITY_DN17243_c1_g3	gmx:100803962	99.8	6e-281	-	UDP-glucose 6-dehydrogenase 1	K00012	UDPglucose 6-dehydrogenase	EC:1.1.1.22	gmx00053	Ascorbate and aldarate metabolism	Metabolism	Carbohydrate metabolism
TRINITY_DN17243_c1_g3	gmx:100803962	99.8	6e-281	-	UDP-glucose 6-dehydrogenase 1	K00012	UDPglucose 6-dehydrogenase	EC:1.1.1.22	gmx00520	Amino sugar and nucleotide sugar metabolism	Metabolism	Carbohydrate metabolism
TRINITY_DN17243_c1_g4	gmx:100799142	100	1.1e-33	-	UDP-glucose 6-dehydrogenase 4-like	K00012	UDPglucose 6-dehydrogenase	EC:1.1.1.22	gmx00040	Pentose and glucuronate interconversions	Metabolism	Carbohydrate metabolism
TRINITY_DN17243_c1_g4	gmx:100799142	100	1.1e-33	-	UDP-glucose 6-dehydrogenase 4-like	K00012	UDPglucose 6-dehydrogenase	EC:1.1.1.22	gmx00053	Ascorbate and aldarate metabolism	Metabolism	Carbohydrate metabolism
TRINITY_DN17243_c1_g4	gmx:100799142	100	1.1e-33	-	UDP-glucose 6-dehydrogenase 4-like	K00012	UDPglucose 6-dehydrogenase	EC:1.1.1.22	gmx00520	Amino sugar and nucleotide sugar metabolism	Metabolism	Carbohydrate metabolism
TRINITY_DN17243_c1_g5	osa:4334169	100	2.3e-36	-	UDP-glucose 6-dehydrogenase 3	K00012	UDPglucose 6-dehydrogenase	EC:1.1.1.22	osa00040	Pentose and glucuronate interconversions	Metabolism	Carbohydrate metabolism
TRINITY_DN17243_c1_g5	osa:4334169	100	2.3e-36	-	UDP-glucose 6-dehydrogenase 3	K00012	UDPglucose 6-dehydrogenase	EC:1.1.1.22	osa00053	Ascorbate and aldarate metabolism	Metabolism	Carbohydrate metabolism
TRINITY_DN17243_c1_g5	osa:4334169	100	2.3e-36	-	UDP-glucose 6-dehydrogenase 3	K00012	UDPglucose 6-dehydrogenase	EC:1.1.1.22	osa00520	Amino sugar and nucleotide sugar metabolism	Metabolism	Carbohydrate metabolism
TRINITY_DN17243_c1_g6	osa:4352146	100	5.6e-32	-	UDP-glucose 6-dehydrogenase 4	K00012	UDPglucose 6-dehydrogenase	EC:1.1.1.22	osa00040	Pentose and glucuronate interconversions	Metabolism	Carbohydrate metabolism
TRINITY_DN17243_c1_g6	osa:4352146	100	5.6e-32	-	UDP-glucose 6-dehydrogenase 4	K00012	UDPglucose 6-dehydrogenase	EC:1.1.1.22	osa00053	Ascorbate and aldarate metabolism	Metabolism	Carbohydrate metabolism
TRINITY_DN17243_c1_g6	osa:4352146	100	5.6e-32	-	UDP-glucose 6-dehydrogenase 4	K00012	UDPglucose 6-dehydrogenase	EC:1.1.1.22	osa00520	Amino sugar and nucleotide sugar metabolism	Metabolism	Carbohydrate metabolism
TRINITY_DN17243_c1_g7	mtr:MTR_7g012950	100	3.8e-16	-	UDP-glucose 6-dehydrogenase family protein	K00012	UDPglucose 6-dehydrogenase	EC:1.1.1.22	mtr00040	Pentose and glucuronate interconversions	Metabolism	Carbohydrate metabolism
TRINITY_DN17243_c1_g7	mtr:MTR_7g012950	100	3.8e-16	-	UDP-glucose 6-dehydrogenase family protein	K00012	UDPglucose 6-dehydrogenase	EC:1.1.1.22	mtr00053	Ascorbate and aldarate metabolism	Metabolism	Carbohydrate metabolism
TRINITY_DN17243_c1_g7	mtr:MTR_7g012950	100	3.8e-16	-	UDP-glucose 6-dehydrogenase family protein	K00012	UDPglucose 6-dehydrogenase	EC:1.1.1.22	mtr00520	Amino sugar and nucleotide sugar metabolism	Metabolism	Carbohydrate metabolism
TRINITY_DN17245_c0_g1	rcu:8269073	89.7	4.3e-191	NA	NA	NA	NA	NA	NA	NA	NA	NA
TRINITY_DN17247_c0_g1	gmx:100806073	100	8.8e-17	-	UDP-glucuronic acid decarboxylase 2-like	K08678	UDP-glucuronate decarboxylase	EC:4.1.1.35	gmx00520	Amino sugar and nucleotide sugar metabolism	Metabolism	Carbohydrate metabolism
TRINITY_DN17248_c0_g2	osa:4334349	100	6.7e-211	-	peroxisomal (S)-2-hydroxy-acid oxidase GLO1	K11517	(S)-2-hydroxy-acid oxidase	EC:1.1.3.15	osa00630	Glyoxylate and dicarboxylate metabolism	Metabolism	Carbohydrate metabolism
TRINITY_DN17248_c0_g2	osa:4334349	100	6.7e-211	-	peroxisomal (S)-2-hydroxy-acid oxidase GLO1	K11517	(S)-2-hydroxy-acid oxidase	EC:1.1.3.15	osa04146	Peroxisome	Cellular Processes	Transport and catabolism
TRINITY_DN17249_c0_g1	osa:4337849	100	5.3e-100	-	60S ribosomal protein L18-3	K02883	large subunit ribosomal protein L18e	-	osa03010	Ribosome	Genetic Information Processing	Translation
TRINITY_DN17249_c0_g5	han:110942388	93	8.5e-94	-	60S ribosomal protein L18-3	K02883	large subunit ribosomal protein L18e	-	han03010	Ribosome	Genetic Information Processing	Translation
TRINITY_DN17249_c0_g6	gmx:100813255	100	1.4e-30	-	60S ribosomal protein L18-2	K02883	large subunit ribosomal protein L18e	-	gmx03010	Ribosome	Genetic Information Processing	Translation
TRINITY_DN17249_c0_g8	gmx:100527681	100	1.9e-32	-	uncharacterized LOC100527681	K02883	large subunit ribosomal protein L18e	-	gmx03010	Ribosome	Genetic Information Processing	Translation
TRINITY_DN17250_c0_g1	lja:Lj4g3v0341090.1	91.7	5.6e-138	NA	NA	NA	NA	NA	NA	NA	NA	NA
TRINITY_DN17251_c0_g2	smo:SELMODRAFT_439638	41.5	2.4e-24	NA	NA	NA	NA	NA	NA	NA	NA	NA
TRINITY_DN17253_c0_g2	gmx:100806848	100	4.6e-29	-	dolichyl-diphosphooligosaccharide--protein glycosyltransferase 48 kDa subunit	K12670	oligosaccharyltransferase complex subunit beta	-	gmx00510	N-Glycan biosynthesis	Metabolism	Glycan biosynthesis and metabolism
TRINITY_DN17253_c0_g2	gmx:100806848	100	4.6e-29	-	dolichyl-diphosphooligosaccharide--protein glycosyltransferase 48 kDa subunit	K12670	oligosaccharyltransferase complex subunit beta	-	gmx04141	Protein processing in endoplasmic reticulum	Genetic Information Processing	Folding, sorting and degradation
TRINITY_DN17256_c0_g1	rcu:8283659	97.2	7.2e-74	-	LOW QUALITY PROTEIN: V-type proton ATPase subunit B 1	K02147	V-type H+-transporting ATPase subunit B	-	rcu00190	Oxidative phosphorylation	Metabolism	Energy metabolism
TRINITY_DN17256_c0_g1	rcu:8283659	97.2	7.2e-74	-	LOW QUALITY PROTEIN: V-type proton ATPase subunit B 1	K02147	V-type H+-transporting ATPase subunit B	-	rcu04145	Phagosome	Cellular Processes	Transport and catabolism
TRINITY_DN17259_c1_g3	nta:107829271	82.8	5.1e-96	-	U2 small nuclear ribonucleoprotein B''-like	K11094	U2 small nuclear ribonucleoprotein B''	-	nta03040	Spliceosome	Genetic Information Processing	Transcription
TRINITY_DN17259_c1_g6	ini:109162972	80.9	1e-98	-	U2 small nuclear ribonucleoprotein B''	K11094	U2 small nuclear ribonucleoprotein B''	-	ini03040	Spliceosome	Genetic Information Processing	Transcription
TRINITY_DN17259_c1_g7	nta:107774892	82.2	1.5e-38	-	U2 small nuclear ribonucleoprotein B''-like	K11094	U2 small nuclear ribonucleoprotein B''	-	nta03040	Spliceosome	Genetic Information Processing	Transcription
TRINITY_DN17261_c0_g2	aly:ARALYDRAFT_665390	69.1	3.8e-16	NA	NA	NA	NA	NA	NA	NA	NA	NA
TRINITY_DN17262_c2_g1	osa:4325027	100	1.3e-59	-	fructose-bisphosphate aldolase cytoplasmic isozyme-like	K01623	fructose-bisphosphate aldolase, class I	EC:4.1.2.13	osa00010	Glycolysis / Gluconeogenesis	Metabolism	Carbohydrate metabolism
TRINITY_DN17262_c2_g1	osa:4325027	100	1.3e-59	-	fructose-bisphosphate aldolase cytoplasmic isozyme-like	K01623	fructose-bisphosphate aldolase, class I	EC:4.1.2.13	osa00030	Pentose phosphate pathway	Metabolism	Carbohydrate metabolism
TRINITY_DN17262_c2_g1	osa:4325027	100	1.3e-59	-	fructose-bisphosphate aldolase cytoplasmic isozyme-like	K01623	fructose-bisphosphate aldolase, class I	EC:4.1.2.13	osa00051	Fructose and mannose metabolism	Metabolism	Carbohydrate metabolism
TRINITY_DN17262_c2_g1	osa:4325027	100	1.3e-59	-	fructose-bisphosphate aldolase cytoplasmic isozyme-like	K01623	fructose-bisphosphate aldolase, class I	EC:4.1.2.13	osa00710	Carbon fixation in photosynthetic organisms	Metabolism	Energy metabolism
TRINITY_DN17265_c0_g1	nta:107832071	34.9	1.1e-36	-	heparanase-like protein 2	K07964	heparanase	EC:3.2.1.166	nta00531	Glycosaminoglycan degradation	Metabolism	Glycan biosynthesis and metabolism
TRINITY_DN17267_c0_g2	vvi:100267308	40.4	1.2e-11	NA	NA	NA	NA	NA	NA	NA	NA	NA
TRINITY_DN17269_c0_g1	gmx:100499884	78.5	1.8e-60	-	uncharacterized LOC100499884	K02896	large subunit ribosomal protein L24e	-	gmx03010	Ribosome	Genetic Information Processing	Translation
TRINITY_DN17270_c0_g1	egu:105052562	35.4	3.5e-34	NA	NA	NA	NA	NA	NA	NA	NA	NA
TRINITY_DN17272_c0_g1	nnu:104599317	65.8	3.9e-18	-	THO complex subunit 4A	K12881	THO complex subunit 4	-	nnu03040	Spliceosome	Genetic Information Processing	Transcription
TRINITY_DN17272_c0_g1	nnu:104599317	65.8	3.9e-18	-	THO complex subunit 4A	K12881	THO complex subunit 4	-	nnu03013	RNA transport	Genetic Information Processing	Translation
TRINITY_DN17272_c0_g1	nnu:104599317	65.8	3.9e-18	-	THO complex subunit 4A	K12881	THO complex subunit 4	-	nnu03015	mRNA surveillance pathway	Genetic Information Processing	Translation
TRINITY_DN17275_c0_g1	sot:102589508	82.6	0	-	DNA replication licensing factor MCM2	K02540	DNA replication licensing factor MCM2	EC:3.6.4.12	sot03030	DNA replication	Genetic Information Processing	Replication and repair
TRINITY_DN17276_c0_g1	egr:108958286	39.1	4.4e-10	NA	NA	NA	NA	NA	NA	NA	NA	NA
TRINITY_DN17276_c0_g3	egr:108958286	39.8	1.7e-10	NA	NA	NA	NA	NA	NA	NA	NA	NA
TRINITY_DN17276_c0_g6	cam:101495989	47.8	5.6e-10	-	protein arginine N-methyltransferase 1.5-like	K02516	type II protein arginine methyltransferase	EC:2.1.1.320	cam03013	RNA transport	Genetic Information Processing	Translation
TRINITY_DN17278_c0_g1	lang:109334895	94.2	9.5e-40	-	60S ribosomal protein L27	K02901	large subunit ribosomal protein L27e	-	lang03010	Ribosome	Genetic Information Processing	Translation
TRINITY_DN17278_c0_g2	osa:4349409	99.3	1.4e-70	-	60S ribosomal protein L27-3	K02901	large subunit ribosomal protein L27e	-	osa03010	Ribosome	Genetic Information Processing	Translation
TRINITY_DN17280_c0_g3	cmo:103489847	41.3	8.9e-38	-	heterogeneous nuclear ribonucleoprotein 1-like	K14411	RNA-binding protein Musashi	-	cmo03015	mRNA surveillance pathway	Genetic Information Processing	Translation
TRINITY_DN17280_c0_g5	nnu:104602803	39.7	7.2e-37	-	heterogeneous nuclear ribonucleoprotein 1-like	K14411	RNA-binding protein Musashi	-	nnu03015	mRNA surveillance pathway	Genetic Information Processing	Translation
TRINITY_DN17281_c0_g1	vvi:100249492	59.2	4.9e-100	NA	NA	NA	NA	NA	NA	NA	NA	NA
TRINITY_DN17282_c0_g8	sind:105176691	59.4	2.1e-45	NA	NA	NA	NA	NA	NA	NA	NA	NA
TRINITY_DN17282_c0_g9	brp:103862557	83.5	1.3e-53	-	probable pectate lyase 18	K01728	pectate lyase	EC:4.2.2.2	brp00040	Pentose and glucuronate interconversions	Metabolism	Carbohydrate metabolism
TRINITY_DN17283_c0_g2	ath:AT5G03340	100	7.4e-35	AtCDC48C	ATPase, AAA-type, CDC48 protein	K13525	transitional endoplasmic reticulum ATPase	-	ath04141	Protein processing in endoplasmic reticulum	Genetic Information Processing	Folding, sorting and degradation
TRINITY_DN17283_c1_g1	ats:109761564	94	3e-35	LOC109761564	cell division control protein 48 homolog E-like	K13525	transitional endoplasmic reticulum ATPase	-	ats04141	Protein processing in endoplasmic reticulum	Genetic Information Processing	Folding, sorting and degradation
TRINITY_DN17283_c1_g2	csl:COCSUDRAFT_67248	43.6	9e-106	NA	NA	NA	NA	NA	NA	NA	NA	NA
TRINITY_DN17283_c1_g3	nta:107821326	73.9	2.5e-95	-	signal recognition particle receptor subunit beta-like	K12272	signal recognition particle receptor subunit beta	-	nta03060	Protein export	Genetic Information Processing	Folding, sorting and degradation
TRINITY_DN17291_c4_g1	soe:110787040	57.4	1.9e-35	NA	NA	NA	NA	NA	NA	NA	NA	NA
TRINITY_DN17293_c0_g1	han:110871908	61.1	1.8e-18	NA	NA	NA	NA	NA	NA	NA	NA	NA
TRINITY_DN17296_c0_g1	cic:CICLE_v10003946mg	36.7	3.3e-33	NA	NA	NA	NA	NA	NA	NA	NA	NA
TRINITY_DN17297_c0_g6	mng:MNEG_8481	34.3	2e-09	-	uridine kinase	K00876	uridine kinase	EC:2.7.1.48	mng00240	Pyrimidine metabolism	Metabolism	Nucleotide metabolism
TRINITY_DN17298_c0_g1	tcc:18590539	75.6	8.6e-282	-	beta-glucosidase BoGH3B	K05349	beta-glucosidase	EC:3.2.1.21	tcc00500	Starch and sucrose metabolism	Metabolism	Carbohydrate metabolism
TRINITY_DN17298_c0_g1	tcc:18590539	75.6	8.6e-282	-	beta-glucosidase BoGH3B	K05349	beta-glucosidase	EC:3.2.1.21	tcc00460	Cyanoamino acid metabolism	Metabolism	Metabolism of other amino acids
TRINITY_DN17298_c0_g1	tcc:18590539	75.6	8.6e-282	-	beta-glucosidase BoGH3B	K05349	beta-glucosidase	EC:3.2.1.21	tcc00940	Phenylpropanoid biosynthesis	Metabolism	Biosynthesis of other secondary metabolites
TRINITY_DN17301_c1_g3	hbr:110651443	60.4	1.6e-65	NA	NA	NA	NA	NA	NA	NA	NA	NA
TRINITY_DN17306_c0_g1	gmx:553156	100	1.9e-143	APX1	ascorbate peroxidase 1, cytosolic	K00434	L-ascorbate peroxidase	EC:1.11.1.11	gmx00053	Ascorbate and aldarate metabolism	Metabolism	Carbohydrate metabolism
TRINITY_DN17306_c0_g1	gmx:553156	100	1.9e-143	APX1	ascorbate peroxidase 1, cytosolic	K00434	L-ascorbate peroxidase	EC:1.11.1.11	gmx00480	Glutathione metabolism	Metabolism	Metabolism of other amino acids
TRINITY_DN17308_c0_g1	vvi:100245540	76.8	2.7e-209	Hyd1	abscisic acid 8'-hydroxylase 4	K09843	(+)-abscisic acid 8'-hydroxylase	EC:1.14.13.93	vvi00906	Carotenoid biosynthesis	Metabolism	Metabolism of terpenoids and polyketides
TRINITY_DN17310_c1_g2	gsl:Gasu_34490	72	2.6e-97	-	60S ribosomal protein L8e	K02938	large subunit ribosomal protein L8e	-	gsl03010	Ribosome	Genetic Information Processing	Translation
TRINITY_DN17310_c1_g4	smo:SELMODRAFT_170971	68.8	1.8e-26	-	hypothetical protein	K02938	large subunit ribosomal protein L8e	-	smo03010	Ribosome	Genetic Information Processing	Translation
TRINITY_DN17316_c0_g3	osa:4344579	100	4.4e-49	-	60S ribosomal protein L37-1	K02922	large subunit ribosomal protein L37e	-	osa03010	Ribosome	Genetic Information Processing	Translation
TRINITY_DN17317_c0_g1	osa:4331966	100	1.4e-144	-	40S ribosomal protein S3a	K02984	small subunit ribosomal protein S3Ae	-	osa03010	Ribosome	Genetic Information Processing	Translation
TRINITY_DN17317_c0_g3	zma:100273118	100	6.2e-44	-	uncharacterized LOC100273118	K02984	small subunit ribosomal protein S3Ae	-	zma03010	Ribosome	Genetic Information Processing	Translation
TRINITY_DN17318_c0_g1	brp:103870249	58	2.5e-91	chitinase	endochitinase CH25	K20547	basic endochitinase B	EC:3.2.1.14	brp00520	Amino sugar and nucleotide sugar metabolism	Metabolism	Carbohydrate metabolism
TRINITY_DN17318_c0_g1	brp:103870249	58	2.5e-91	chitinase	endochitinase CH25	K20547	basic endochitinase B	EC:3.2.1.14	brp04016	MAPK signaling pathway - plant	Environmental Information Processing	Signal transduction
TRINITY_DN17320_c0_g1	sbi:8085549	65.7	1.5e-31	-	40S ribosomal protein S24-1	K02974	small subunit ribosomal protein S24e	-	sbi03010	Ribosome	Genetic Information Processing	Translation
TRINITY_DN17320_c0_g2	ats:109742412	59.1	3.2e-33	LOC109742412	40S ribosomal protein S24-1-like	K02974	small subunit ribosomal protein S24e	-	ats03010	Ribosome	Genetic Information Processing	Translation
TRINITY_DN17321_c0_g1	sind:105175271	65.7	1.2e-86	NA	NA	NA	NA	NA	NA	NA	NA	NA
TRINITY_DN17322_c0_g2	gsl:Gasu_61420	53.6	2.8e-46	-	60S ribosomal protein L18Ae	K02882	large subunit ribosomal protein L18Ae	-	gsl03010	Ribosome	Genetic Information Processing	Translation
TRINITY_DN17322_c0_g3	pda:103706950	53.6	5.2e-48	-	60S ribosomal protein L18a-2	K02882	large subunit ribosomal protein L18Ae	-	pda03010	Ribosome	Genetic Information Processing	Translation
TRINITY_DN17325_c0_g1	cre:CHLREDRAFT_159272	58	1.1e-40	RPS12	ribosomal protein S12	K02951	small subunit ribosomal protein S12e	-	cre03010	Ribosome	Genetic Information Processing	Translation
TRINITY_DN17326_c0_g2	sot:102588978	38.8	6.1e-10	-	probable protein phosphatase 2C 75	K14497	protein phosphatase 2C	EC:3.1.3.16	sot04016	MAPK signaling pathway - plant	Environmental Information Processing	Signal transduction
TRINITY_DN17326_c0_g2	sot:102588978	38.8	6.1e-10	-	probable protein phosphatase 2C 75	K14497	protein phosphatase 2C	EC:3.1.3.16	sot04075	Plant hormone signal transduction	Environmental Information Processing	Signal transduction
TRINITY_DN17328_c0_g3	han:110942291	91.6	3.8e-272	NA	NA	NA	NA	NA	NA	NA	NA	NA
TRINITY_DN17333_c2_g14	zma:103643560	60.3	2e-20	NA	NA	NA	NA	NA	NA	NA	NA	NA
TRINITY_DN17333_c2_g2	sind:105161343	82.4	7.1e-38	-	phosphatidylinositol 4-phosphate 5-kinase 9	K00889	1-phosphatidylinositol-4-phosphate 5-kinase	EC:2.7.1.68	sind00562	Inositol phosphate metabolism	Metabolism	Carbohydrate metabolism
TRINITY_DN17333_c2_g2	sind:105161343	82.4	7.1e-38	-	phosphatidylinositol 4-phosphate 5-kinase 9	K00889	1-phosphatidylinositol-4-phosphate 5-kinase	EC:2.7.1.68	sind04070	Phosphatidylinositol signaling system	Environmental Information Processing	Signal transduction
TRINITY_DN17333_c2_g2	sind:105161343	82.4	7.1e-38	-	phosphatidylinositol 4-phosphate 5-kinase 9	K00889	1-phosphatidylinositol-4-phosphate 5-kinase	EC:2.7.1.68	sind04144	Endocytosis	Cellular Processes	Transport and catabolism
TRINITY_DN17334_c1_g1	nta:107783970	50.7	3.3e-25	-	zeatin O-glucosyltransferase-like	K13495	cis-zeatin O-glucosyltransferase	EC:2.4.1.215	nta00908	Zeatin biosynthesis	Metabolism	Metabolism of terpenoids and polyketides
TRINITY_DN17335_c0_g2	gra:105772591	49	8.8e-15	NA	NA	NA	NA	NA	NA	NA	NA	NA
TRINITY_DN17335_c0_g3	sind:105168055	45.1	2.3e-48	NA	NA	NA	NA	NA	NA	NA	NA	NA
TRINITY_DN17337_c0_g1	atr:105420786	48.5	2.5e-74	NA	NA	NA	NA	NA	NA	NA	NA	NA
TRINITY_DN17344_c0_g1	egu:105055606	63	2.3e-19	-	ubiquitin-conjugating enzyme E2 5 isoform X1	K10576	ubiquitin-conjugating enzyme E2 H	EC:2.3.2.23	egu04120	Ubiquitin mediated proteolysis	Genetic Information Processing	Folding, sorting and degradation
TRINITY_DN17344_c0_g2	jcu:105641918	70.4	4e-26	-	ubiquitin-conjugating enzyme E2-23 kDa isoform X1	K10576	ubiquitin-conjugating enzyme E2 H	EC:2.3.2.23	jcu04120	Ubiquitin mediated proteolysis	Genetic Information Processing	Folding, sorting and degradation
TRINITY_DN17346_c0_g1	hbr:110651448	80.4	7.5e-102	-	very-long-chain (3R)-3-hydroxyacyl-CoA dehydratase PASTICCINO 2	K10703	very-long-chain (3R)-3-hydroxyacyl-CoA dehydratase	EC:4.2.1.134	hbr00062	Fatty acid elongation	Metabolism	Lipid metabolism
TRINITY_DN17346_c0_g1	hbr:110651448	80.4	7.5e-102	-	very-long-chain (3R)-3-hydroxyacyl-CoA dehydratase PASTICCINO 2	K10703	very-long-chain (3R)-3-hydroxyacyl-CoA dehydratase	EC:4.2.1.134	hbr01040	Biosynthesis of unsaturated fatty acids	Metabolism	Lipid metabolism
TRINITY_DN17347_c0_g1	bdi:100839931	84.4	9.5e-33	-	40S ribosomal protein S27	K02978	small subunit ribosomal protein S27e	-	bdi03010	Ribosome	Genetic Information Processing	Translation
TRINITY_DN17347_c0_g2	bdi:100839931	81.8	4.9e-32	-	40S ribosomal protein S27	K02978	small subunit ribosomal protein S27e	-	bdi03010	Ribosome	Genetic Information Processing	Translation
TRINITY_DN17347_c0_g3	bdi:100839931	75.3	4.3e-28	-	40S ribosomal protein S27	K02978	small subunit ribosomal protein S27e	-	bdi03010	Ribosome	Genetic Information Processing	Translation
TRINITY_DN17348_c0_g1	ccp:CHC_T00009537001	68.9	4.9e-86	NA	NA	NA	NA	NA	NA	NA	NA	NA
TRINITY_DN17349_c2_g1	lja:Lj0g3v0164619.1	38.6	2.8e-31	Lj0g3v0164619.1	-	K12251	N-carbamoylputrescine amidase	EC:3.5.1.53	lja00330	Arginine and proline metabolism	Metabolism	Amino acid metabolism
TRINITY_DN17349_c2_g2	cann:107874343	43.3	2.5e-08	-	ABC transporter C family member 10-like	K05666	ATP-binding cassette, subfamily C (CFTR/MRP), member 2	-	cann02010	ABC transporters	Environmental Information Processing	Membrane transport
TRINITY_DN17353_c1_g4	pxb:103935832	58.3	9.2e-28	NA	NA	NA	NA	NA	NA	NA	NA	NA
TRINITY_DN17358_c0_g1	pmum:103336120	79.2	2e-85	NA	NA	NA	NA	NA	NA	NA	NA	NA
TRINITY_DN17361_c0_g2	hbr:110659985	24.8	1.1e-14	NA	NA	NA	NA	NA	NA	NA	NA	NA
TRINITY_DN17362_c0_g1	cann:107872609	63.6	1.4e-175	NA	NA	NA	NA	NA	NA	NA	NA	NA
TRINITY_DN17363_c0_g2	var:108341909	61.3	6.9e-89	NA	NA	NA	NA	NA	NA	NA	NA	NA
TRINITY_DN17367_c0_g1	egr:104441149	83.8	7.2e-34	-	oxygen-evolving enhancer protein 3-2	K08901	photosystem II oxygen-evolving enhancer protein 3	-	egr00195	Photosynthesis	Metabolism	Energy metabolism
TRINITY_DN17368_c0_g2	sind:105172515	51.5	2e-61	NA	NA	NA	NA	NA	NA	NA	NA	NA
TRINITY_DN17373_c0_g1	zma:103635377	83.9	7e-09	NA	NA	NA	NA	NA	NA	NA	NA	NA
TRINITY_DN17374_c0_g8	nnu:104613014	80.9	8.7e-43	-	ATP synthase subunit O	K02137	F-type H+-transporting ATPase subunit O	-	nnu00190	Oxidative phosphorylation	Metabolism	Energy metabolism
TRINITY_DN17375_c0_g3	cpap:110815117	55.5	4.1e-65	NA	NA	NA	NA	NA	NA	NA	NA	NA
TRINITY_DN17380_c0_g1	sind:105178111	95.1	1e-93	-	probable nucleolar protein 5-2	K14565	nucleolar protein 58	-	sind03008	Ribosome biogenesis in eukaryotes	Genetic Information Processing	Translation
TRINITY_DN17380_c0_g3	osa:4332840	100	1.1e-56	-	probable nucleolar protein 5-2	K14565	nucleolar protein 58	-	osa03008	Ribosome biogenesis in eukaryotes	Genetic Information Processing	Translation
TRINITY_DN17380_c1_g1	vvi:100265860	63.6	9.6e-115	-	exosome complex component RRP45A	K03678	exosome complex component RRP45	-	vvi03018	RNA degradation	Genetic Information Processing	Folding, sorting and degradation
TRINITY_DN17383_c0_g1	jcu:105639144	80.5	2.3e-154	NA	NA	NA	NA	NA	NA	NA	NA	NA
TRINITY_DN17385_c0_g1	bvg:104903890	84.7	3.8e-59	NA	NA	NA	NA	NA	NA	NA	NA	NA
TRINITY_DN17389_c0_g1	nnu:104600631	92.2	3.9e-25	NA	NA	NA	NA	NA	NA	NA	NA	NA
TRINITY_DN17389_c0_g4	pavi:110745902	50.7	4.3e-08	NA	NA	NA	NA	NA	NA	NA	NA	NA
TRINITY_DN17391_c0_g1	han:110912890	55.1	1.1e-154	NA	NA	NA	NA	NA	NA	NA	NA	NA
TRINITY_DN17393_c0_g2	nta:107803873	95.5	2.5e-68	-	pyruvate dehydrogenase E1 component subunit beta-1	K00162	pyruvate dehydrogenase E1 component beta subunit	EC:1.2.4.1	nta00010	Glycolysis / Gluconeogenesis	Metabolism	Carbohydrate metabolism
TRINITY_DN17393_c0_g2	nta:107803873	95.5	2.5e-68	-	pyruvate dehydrogenase E1 component subunit beta-1	K00162	pyruvate dehydrogenase E1 component beta subunit	EC:1.2.4.1	nta00020	Citrate cycle (TCA cycle)	Metabolism	Carbohydrate metabolism
TRINITY_DN17393_c0_g2	nta:107803873	95.5	2.5e-68	-	pyruvate dehydrogenase E1 component subunit beta-1	K00162	pyruvate dehydrogenase E1 component beta subunit	EC:1.2.4.1	nta00620	Pyruvate metabolism	Metabolism	Carbohydrate metabolism
TRINITY_DN17393_c1_g1	sly:101266731	92.8	2.1e-37	-	pyruvate dehydrogenase E1 component subunit beta-1	K00162	pyruvate dehydrogenase E1 component beta subunit	EC:1.2.4.1	sly00010	Glycolysis / Gluconeogenesis	Metabolism	Carbohydrate metabolism
TRINITY_DN17393_c1_g1	sly:101266731	92.8	2.1e-37	-	pyruvate dehydrogenase E1 component subunit beta-1	K00162	pyruvate dehydrogenase E1 component beta subunit	EC:1.2.4.1	sly00020	Citrate cycle (TCA cycle)	Metabolism	Carbohydrate metabolism
TRINITY_DN17393_c1_g1	sly:101266731	92.8	2.1e-37	-	pyruvate dehydrogenase E1 component subunit beta-1	K00162	pyruvate dehydrogenase E1 component beta subunit	EC:1.2.4.1	sly00620	Pyruvate metabolism	Metabolism	Carbohydrate metabolism
TRINITY_DN17394_c0_g1	csv:101205080	99.2	7.2e-73	NA	NA	NA	NA	NA	NA	NA	NA	NA
TRINITY_DN17402_c1_g1	mus:103981825	31.7	2.4e-09	-	transcription factor MYC2-like	K13422	transcription factor MYC2	-	mus04016	MAPK signaling pathway - plant	Environmental Information Processing	Signal transduction
TRINITY_DN17402_c1_g1	mus:103981825	31.7	2.4e-09	-	transcription factor MYC2-like	K13422	transcription factor MYC2	-	mus04075	Plant hormone signal transduction	Environmental Information Processing	Signal transduction
TRINITY_DN17402_c1_g3	sbi:110435403	66.7	1.3e-47	-	mitogen-activated protein kinase kinase 5-like	K13413	mitogen-activated protein kinase kinase 4/5	EC:2.7.12.2	sbi04016	MAPK signaling pathway - plant	Environmental Information Processing	Signal transduction
TRINITY_DN17402_c1_g3	sbi:110435403	66.7	1.3e-47	-	mitogen-activated protein kinase kinase 5-like	K13413	mitogen-activated protein kinase kinase 4/5	EC:2.7.12.2	sbi04075	Plant hormone signal transduction	Environmental Information Processing	Signal transduction
TRINITY_DN17402_c1_g3	sbi:110435403	66.7	1.3e-47	-	mitogen-activated protein kinase kinase 5-like	K13413	mitogen-activated protein kinase kinase 4/5	EC:2.7.12.2	sbi04626	Plant-pathogen interaction	Organismal Systems	Environmental adaptation
TRINITY_DN17404_c0_g1	lja:Lj1g3v2404330.2	76.1	1.1e-59	NA	NA	NA	NA	NA	NA	NA	NA	NA
TRINITY_DN17405_c0_g1	adu:107475384	55.6	1.1e-39	NA	NA	NA	NA	NA	NA	NA	NA	NA
TRINITY_DN17405_c0_g2	gmx:547824	51.7	3e-39	NA	NA	NA	NA	NA	NA	NA	NA	NA
TRINITY_DN17406_c0_g3	obr:102701992	32.3	2.6e-11	NA	NA	NA	NA	NA	NA	NA	NA	NA
TRINITY_DN17410_c1_g4	vvi:100241567	60.9	1.1e-167	-	GPI mannosyltransferase 2	K07542	phosphatidylinositol glycan, class V	EC:2.4.1.-	vvi00563	Glycosylphosphatidylinositol(GPI)-anchor biosynthesis	Metabolism	Glycan biosynthesis and metabolism
TRINITY_DN17411_c0_g1	smo:SELMODRAFT_60690	32.9	5.5e-61	NA	NA	NA	NA	NA	NA	NA	NA	NA
TRINITY_DN17412_c0_g3	nta:107828200	97.8	2.8e-21	-	ubiquitin-conjugating enzyme E2 28-like	K06689	ubiquitin-conjugating enzyme E2 D	EC:2.3.2.23	nta04141	Protein processing in endoplasmic reticulum	Genetic Information Processing	Folding, sorting and degradation
TRINITY_DN17412_c0_g3	nta:107828200	97.8	2.8e-21	-	ubiquitin-conjugating enzyme E2 28-like	K06689	ubiquitin-conjugating enzyme E2 D	EC:2.3.2.23	nta04120	Ubiquitin mediated proteolysis	Genetic Information Processing	Folding, sorting and degradation
TRINITY_DN17412_c0_g4	bdi:100821498	98.8	8e-41	-	ubiquitin-conjugating enzyme E2-17 kDa	K06689	ubiquitin-conjugating enzyme E2 D	EC:2.3.2.23	bdi04141	Protein processing in endoplasmic reticulum	Genetic Information Processing	Folding, sorting and degradation
TRINITY_DN17412_c0_g4	bdi:100821498	98.8	8e-41	-	ubiquitin-conjugating enzyme E2-17 kDa	K06689	ubiquitin-conjugating enzyme E2 D	EC:2.3.2.23	bdi04120	Ubiquitin mediated proteolysis	Genetic Information Processing	Folding, sorting and degradation
TRINITY_DN17414_c0_g1	han:110923051	81.2	5.3e-50	-	frataxin	K19054	frataxin	EC:1.16.3.1	han00860	Porphyrin and chlorophyll metabolism	Metabolism	Metabolism of cofactors and vitamins
TRINITY_DN17414_c0_g2	han:110923051	81	1.8e-53	-	frataxin	K19054	frataxin	EC:1.16.3.1	han00860	Porphyrin and chlorophyll metabolism	Metabolism	Metabolism of cofactors and vitamins
TRINITY_DN17415_c0_g1	han:110865694	76.9	2.5e-46	NA	NA	NA	NA	NA	NA	NA	NA	NA
TRINITY_DN17415_c0_g2	sind:105173911	68.8	1.3e-36	NA	NA	NA	NA	NA	NA	NA	NA	NA
TRINITY_DN17417_c0_g1	mdm:103402654	71.4	2.3e-76	-	lipid phosphate phosphatase 2-like	K18693	diacylglycerol diphosphate phosphatase / phosphatidate phosphatase	EC:3.1.3.81 3.1.3.4	mdm00561	Glycerolipid metabolism	Metabolism	Lipid metabolism
TRINITY_DN17417_c0_g1	mdm:103402654	71.4	2.3e-76	-	lipid phosphate phosphatase 2-like	K18693	diacylglycerol diphosphate phosphatase / phosphatidate phosphatase	EC:3.1.3.81 3.1.3.4	mdm00564	Glycerophospholipid metabolism	Metabolism	Lipid metabolism
TRINITY_DN17418_c0_g1	pavi:110763850	86.9	6.4e-50	-	50S ribosomal protein L3-2	K02906	large subunit ribosomal protein L3	-	pavi03010	Ribosome	Genetic Information Processing	Translation
TRINITY_DN17419_c0_g1	nto:104095884	91.6	4.4e-34	NA	NA	NA	NA	NA	NA	NA	NA	NA
TRINITY_DN17419_c1_g3	sind:105176182	63.5	9.7e-67	NA	NA	NA	NA	NA	NA	NA	NA	NA
TRINITY_DN17421_c0_g1	vvi:100258554	42	2.1e-82	NA	NA	NA	NA	NA	NA	NA	NA	NA
TRINITY_DN17421_c0_g2	cit:102611438	83	2.4e-43	NA	NA	NA	NA	NA	NA	NA	NA	NA
TRINITY_DN17422_c1_g1	gmx:100780604	100	1.4e-52	-	40S ribosomal protein S14	K02955	small subunit ribosomal protein S14e	-	gmx03010	Ribosome	Genetic Information Processing	Translation
TRINITY_DN17422_c1_g3	nnu:104587778	88.7	4.9e-69	-	40S ribosomal protein S14-like	K02955	small subunit ribosomal protein S14e	-	nnu03010	Ribosome	Genetic Information Processing	Translation
TRINITY_DN17422_c1_g5	nnu:104587778	88	7.2e-64	-	40S ribosomal protein S14-like	K02955	small subunit ribosomal protein S14e	-	nnu03010	Ribosome	Genetic Information Processing	Translation
TRINITY_DN17423_c0_g1	gra:105767835	36.8	2.4e-14	NA	NA	NA	NA	NA	NA	NA	NA	NA
TRINITY_DN17424_c0_g1	vvi:100250839	79.8	7.9e-234	-	serine/threonine protein phosphatase 2A 57 kDa regulatory subunit B' theta isoform	K11584	serine/threonine-protein phosphatase 2A regulatory subunit B'	-	vvi03015	mRNA surveillance pathway	Genetic Information Processing	Translation
TRINITY_DN17426_c0_g1	nta:107824339	94.5	8.3e-240	NA	NA	NA	NA	NA	NA	NA	NA	NA
TRINITY_DN17427_c0_g1	vvi:100232964	83.6	5.3e-126	-	ubiquitin-activating enzyme E1 1	K03178	ubiquitin-activating enzyme E1	EC:6.2.1.45	vvi04120	Ubiquitin mediated proteolysis	Genetic Information Processing	Folding, sorting and degradation
TRINITY_DN17428_c0_g1	han:110941918	79.2	1.2e-36	NA	NA	NA	NA	NA	NA	NA	NA	NA
TRINITY_DN17428_c0_g2	mtr:MTR_8g066120	45.8	1.5e-48	NA	NA	NA	NA	NA	NA	NA	NA	NA
TRINITY_DN17429_c1_g2	ini:109186464	68.5	1.3e-126	NA	NA	NA	NA	NA	NA	NA	NA	NA
TRINITY_DN17430_c0_g5	hbr:110641057	41	5e-14	NA	NA	NA	NA	NA	NA	NA	NA	NA
TRINITY_DN17433_c0_g1	vra:106774141	52.6	5e-94	-	transcription initiation factor TFIID subunit 12b	K03126	transcription initiation factor TFIID subunit 12	-	vra03022	Basal transcription factors	Genetic Information Processing	Transcription
TRINITY_DN17434_c0_g1	egr:104438149	84	5.3e-99	-	40S ribosomal protein S3-3	K02985	small subunit ribosomal protein S3e	-	egr03010	Ribosome	Genetic Information Processing	Translation
TRINITY_DN17435_c0_g1	nnu:104603453	69.4	1.1e-96	NA	NA	NA	NA	NA	NA	NA	NA	NA
TRINITY_DN17437_c0_g3	mdm:103403075	89.6	1.4e-259	-	glutamate--glyoxylate aminotransferase 2	K14272	glutamate--glyoxylate aminotransferase	EC:2.6.1.4 2.6.1.2 2.6.1.44	mdm00630	Glyoxylate and dicarboxylate metabolism	Metabolism	Carbohydrate metabolism
TRINITY_DN17437_c0_g3	mdm:103403075	89.6	1.4e-259	-	glutamate--glyoxylate aminotransferase 2	K14272	glutamate--glyoxylate aminotransferase	EC:2.6.1.4 2.6.1.2 2.6.1.44	mdm00710	Carbon fixation in photosynthetic organisms	Metabolism	Energy metabolism
TRINITY_DN17437_c0_g3	mdm:103403075	89.6	1.4e-259	-	glutamate--glyoxylate aminotransferase 2	K14272	glutamate--glyoxylate aminotransferase	EC:2.6.1.4 2.6.1.2 2.6.1.44	mdm00250	Alanine, aspartate and glutamate metabolism	Metabolism	Amino acid metabolism
TRINITY_DN17437_c0_g3	mdm:103403075	89.6	1.4e-259	-	glutamate--glyoxylate aminotransferase 2	K14272	glutamate--glyoxylate aminotransferase	EC:2.6.1.4 2.6.1.2 2.6.1.44	mdm00260	Glycine, serine and threonine metabolism	Metabolism	Amino acid metabolism
TRINITY_DN17437_c0_g3	mdm:103403075	89.6	1.4e-259	-	glutamate--glyoxylate aminotransferase 2	K14272	glutamate--glyoxylate aminotransferase	EC:2.6.1.4 2.6.1.2 2.6.1.44	mdm00220	Arginine biosynthesis	Metabolism	Amino acid metabolism
TRINITY_DN17448_c2_g1	nnu:104593708	61.8	6.9e-18	-	indole-3-acetic acid-induced protein ARG7-like	K14488	SAUR family protein	-	nnu04075	Plant hormone signal transduction	Environmental Information Processing	Signal transduction
TRINITY_DN17449_c0_g3	han:110940593	91.4	3.4e-86	NA	NA	NA	NA	NA	NA	NA	NA	NA
TRINITY_DN17449_c0_g5	sind:105167272	79.4	5.8e-24	NA	NA	NA	NA	NA	NA	NA	NA	NA
TRINITY_DN1744_c0_g1	cvr:OJ20_p17	24.6	3.3e-08	nad2	NADH dehydrogenase subunit 2	K03879	NADH-ubiquinone oxidoreductase chain 2	EC:1.6.5.3	cvr00190	Oxidative phosphorylation	Metabolism	Energy metabolism
TRINITY_DN17450_c1_g2	hbr:110633871	39.7	1.7e-06	NA	NA	NA	NA	NA	NA	NA	NA	NA
TRINITY_DN17451_c3_g1	lang:109338268	85.9	5.7e-123	NA	NA	NA	NA	NA	NA	NA	NA	NA
TRINITY_DN17451_c3_g2	han:110909310	91.2	1.3e-86	NA	NA	NA	NA	NA	NA	NA	NA	NA
TRINITY_DN17451_c3_g5	nta:107813146	87.8	6e-31	NA	NA	NA	NA	NA	NA	NA	NA	NA
TRINITY_DN17452_c1_g3	gra:105783611	92.3	2e-288	-	catalase isozyme 1	K03781	catalase	EC:1.11.1.6	gra00630	Glyoxylate and dicarboxylate metabolism	Metabolism	Carbohydrate metabolism
TRINITY_DN17452_c1_g3	gra:105783611	92.3	2e-288	-	catalase isozyme 1	K03781	catalase	EC:1.11.1.6	gra00380	Tryptophan metabolism	Metabolism	Amino acid metabolism
TRINITY_DN17452_c1_g3	gra:105783611	92.3	2e-288	-	catalase isozyme 1	K03781	catalase	EC:1.11.1.6	gra04016	MAPK signaling pathway - plant	Environmental Information Processing	Signal transduction
TRINITY_DN17452_c1_g3	gra:105783611	92.3	2e-288	-	catalase isozyme 1	K03781	catalase	EC:1.11.1.6	gra04146	Peroxisome	Cellular Processes	Transport and catabolism
TRINITY_DN17453_c0_g2	ghi:107900980	55.1	3.8e-08	-	dolichyl-phosphate beta-glucosyltransferase-like	K00729	dolichyl-phosphate beta-glucosyltransferase	EC:2.4.1.117	ghi00510	N-Glycan biosynthesis	Metabolism	Glycan biosynthesis and metabolism
TRINITY_DN17455_c0_g1	soe:110789024	40.7	1.1e-11	-	uncharacterized protein LOC110789024	K02704	photosystem II CP47 chlorophyll apoprotein	-	soe00195	Photosynthesis	Metabolism	Energy metabolism
TRINITY_DN17455_c1_g1	mcha:111010887	52.8	6.7e-29	-	(3S	K14175	(3S,6E)-nerolidol synthase	EC:4.2.3.48	mcha00909	Sesquiterpenoid and triterpenoid biosynthesis	Metabolism	Metabolism of terpenoids and polyketides
TRINITY_DN17455_c1_g9	egr:108958286	38.9	2.4e-13	NA	NA	NA	NA	NA	NA	NA	NA	NA
TRINITY_DN17457_c2_g1	sind:105159137	71	6.9e-261	-	polyadenylate-binding protein 8-like	K13126	polyadenylate-binding protein	-	sind03013	RNA transport	Genetic Information Processing	Translation
TRINITY_DN17457_c2_g1	sind:105159137	71	6.9e-261	-	polyadenylate-binding protein 8-like	K13126	polyadenylate-binding protein	-	sind03015	mRNA surveillance pathway	Genetic Information Processing	Translation
TRINITY_DN17457_c2_g1	sind:105159137	71	6.9e-261	-	polyadenylate-binding protein 8-like	K13126	polyadenylate-binding protein	-	sind03018	RNA degradation	Genetic Information Processing	Folding, sorting and degradation
TRINITY_DN17458_c1_g2	mdm:103453965	57.1	1.2e-19	NA	NA	NA	NA	NA	NA	NA	NA	NA
TRINITY_DN17458_c1_g3	mdm:103453965	45.5	9e-12	NA	NA	NA	NA	NA	NA	NA	NA	NA
TRINITY_DN17459_c0_g1	sind:105169322	94.1	1e-56	NA	NA	NA	NA	NA	NA	NA	NA	NA
TRINITY_DN17462_c0_g1	aly:ARALYDRAFT_902799	33.3	1.5e-62	NA	NA	NA	NA	NA	NA	NA	NA	NA
TRINITY_DN17466_c0_g1	sind:105157706	79.8	5.3e-66	NA	NA	NA	NA	NA	NA	NA	NA	NA
TRINITY_DN17467_c0_g1	eus:EUTSA_v10016128mg	47	2.8e-28	NA	NA	NA	NA	NA	NA	NA	NA	NA
TRINITY_DN17474_c0_g1	gmx:100787536	58.8	7.6e-26	NA	NA	NA	NA	NA	NA	NA	NA	NA
TRINITY_DN17475_c0_g1	vvi:100249389	60.2	5.1e-291	NA	NA	NA	NA	NA	NA	NA	NA	NA
TRINITY_DN17477_c0_g1	tcc:18594181	76.7	5.4e-185	-	uroporphyrinogen decarboxylase 1	K01599	uroporphyrinogen decarboxylase	EC:4.1.1.37	tcc00860	Porphyrin and chlorophyll metabolism	Metabolism	Metabolism of cofactors and vitamins
TRINITY_DN17480_c0_g2	gmx:100814088	100	8.3e-13	-	V-type proton ATPase subunit B 2	K02147	V-type H+-transporting ATPase subunit B	-	gmx00190	Oxidative phosphorylation	Metabolism	Energy metabolism
TRINITY_DN17480_c0_g2	gmx:100814088	100	8.3e-13	-	V-type proton ATPase subunit B 2	K02147	V-type H+-transporting ATPase subunit B	-	gmx04145	Phagosome	Cellular Processes	Transport and catabolism
TRINITY_DN17480_c0_g5	nta:107771530	95.4	8.1e-114	-	V-type proton ATPase subunit B 2-like	K02147	V-type H+-transporting ATPase subunit B	-	nta00190	Oxidative phosphorylation	Metabolism	Energy metabolism
TRINITY_DN17480_c0_g5	nta:107771530	95.4	8.1e-114	-	V-type proton ATPase subunit B 2-like	K02147	V-type H+-transporting ATPase subunit B	-	nta04145	Phagosome	Cellular Processes	Transport and catabolism
TRINITY_DN17480_c0_g7	egr:104453437	100	2.3e-75	-	V-type proton ATPase subunit B 2	K02147	V-type H+-transporting ATPase subunit B	-	egr00190	Oxidative phosphorylation	Metabolism	Energy metabolism
TRINITY_DN17480_c0_g7	egr:104453437	100	2.3e-75	-	V-type proton ATPase subunit B 2	K02147	V-type H+-transporting ATPase subunit B	-	egr04145	Phagosome	Cellular Processes	Transport and catabolism
TRINITY_DN17483_c2_g8	pper:18783073	77.1	1.2e-23	NA	NA	NA	NA	NA	NA	NA	NA	NA
TRINITY_DN17485_c0_g1	osa:4324481	100	3.2e-60	NA	NA	NA	NA	NA	NA	NA	NA	NA
TRINITY_DN17486_c0_g1	ccaj:109797889	39.1	8.1e-20	NA	NA	NA	NA	NA	NA	NA	NA	NA
TRINITY_DN17488_c0_g1	ats:109770620	43.7	2.5e-34	LOC109770620	stress-response A/B barrel domain-containing protein DABB1-like	K13346	peroxin-10	-	ats04146	Peroxisome	Cellular Processes	Transport and catabolism
TRINITY_DN17491_c0_g6	pmum:103321847	85	3.2e-34	NA	NA	NA	NA	NA	NA	NA	NA	NA
TRINITY_DN17492_c0_g1	zma:100280496	36.5	7.6e-35	NA	NA	NA	NA	NA	NA	NA	NA	NA
TRINITY_DN17494_c2_g3	hbr:110664422	43.3	5.4e-07	NA	NA	NA	NA	NA	NA	NA	NA	NA
TRINITY_DN17496_c0_g1	adu:107486077	90.2	5.5e-67	NA	NA	NA	NA	NA	NA	NA	NA	NA
TRINITY_DN17497_c0_g1	pper:18790596	84.5	8.5e-45	-	cycloartenol synthase 2	K01853	cycloartenol synthase	EC:5.4.99.8	pper00100	Steroid biosynthesis	Metabolism	Lipid metabolism
TRINITY_DN17498_c0_g1	ghi:107950267	55.3	4.6e-28	-	60S ribosomal protein L13-1-like	K02873	large subunit ribosomal protein L13e	-	ghi03010	Ribosome	Genetic Information Processing	Translation
TRINITY_DN17498_c0_g2	smo:SELMODRAFT_266648	67.8	1.1e-52	-	hypothetical protein	K02873	large subunit ribosomal protein L13e	-	smo03010	Ribosome	Genetic Information Processing	Translation
TRINITY_DN17498_c0_g3	smo:SELMODRAFT_266648	58.1	4.5e-56	-	hypothetical protein	K02873	large subunit ribosomal protein L13e	-	smo03010	Ribosome	Genetic Information Processing	Translation
TRINITY_DN17500_c0_g1	pxb:103948507	88.1	6.2e-53	-	protein STABILIZED1-like	K12855	pre-mRNA-processing factor 6	-	pxb03040	Spliceosome	Genetic Information Processing	Transcription
TRINITY_DN17502_c0_g1	vvi:100253258	71.1	5.2e-233	-	30-kDa cleavage and polyadenylation specificity factor 30	K14404	cleavage and polyadenylation specificity factor subunit 4	-	vvi03015	mRNA surveillance pathway	Genetic Information Processing	Translation
TRINITY_DN17502_c0_g5	cit:102616841	96.7	6.1e-296	NA	NA	NA	NA	NA	NA	NA	NA	NA
TRINITY_DN17507_c0_g1	han:110864240	75.7	1.8e-79	NA	NA	NA	NA	NA	NA	NA	NA	NA
TRINITY_DN17508_c1_g1	gmx:100798104	70.3	5e-56	-	SKP1-like protein 1A-like	K03094	S-phase kinase-associated protein 1	-	gmx04141	Protein processing in endoplasmic reticulum	Genetic Information Processing	Folding, sorting and degradation
TRINITY_DN17508_c1_g1	gmx:100798104	70.3	5e-56	-	SKP1-like protein 1A-like	K03094	S-phase kinase-associated protein 1	-	gmx04120	Ubiquitin mediated proteolysis	Genetic Information Processing	Folding, sorting and degradation
TRINITY_DN17509_c0_g1	obr:102701992	37.6	5.3e-09	NA	NA	NA	NA	NA	NA	NA	NA	NA
TRINITY_DN17510_c0_g1	osa:4347522	100	2.3e-139	-	60S ribosomal protein L7a	K02936	large subunit ribosomal protein L7Ae	-	osa03010	Ribosome	Genetic Information Processing	Translation
TRINITY_DN17512_c0_g1	tcc:18586038	79.7	1.5e-230	-	protein FIZZY-RELATED 3	K03364	cell division cycle 20-like protein 1, cofactor of APC complex	-	tcc04120	Ubiquitin mediated proteolysis	Genetic Information Processing	Folding, sorting and degradation
TRINITY_DN17514_c0_g4	gmx:100813370	98.7	7.3e-36	NA	NA	NA	NA	NA	NA	NA	NA	NA
TRINITY_DN17514_c0_g5	cit:102616859	96.4	4.6e-103	NA	NA	NA	NA	NA	NA	NA	NA	NA
TRINITY_DN17515_c1_g1	brp:103857907	83.6	1.7e-25	-	phosphoinositide phospholipase C 6-like	K05857	phosphatidylinositol phospholipase C, delta	EC:3.1.4.11	brp00562	Inositol phosphate metabolism	Metabolism	Carbohydrate metabolism
TRINITY_DN17515_c1_g1	brp:103857907	83.6	1.7e-25	-	phosphoinositide phospholipase C 6-like	K05857	phosphatidylinositol phospholipase C, delta	EC:3.1.4.11	brp04070	Phosphatidylinositol signaling system	Environmental Information Processing	Signal transduction
TRINITY_DN17515_c1_g1	brp:103857907	83.6	1.7e-25	-	phosphoinositide phospholipase C 6-like	K05857	phosphatidylinositol phospholipase C, delta	EC:3.1.4.11	brp04933	AGE-RAGE signaling pathway in diabetic complications	Human Diseases	Endocrine and metabolic diseases
TRINITY_DN17517_c0_g1	fve:101290788	54.1	6.4e-120	-	omega-6 fatty acid desaturase	K10256	omega-6 fatty acid desaturase / acyl-lipid omega-6 desaturase (Delta-12 desaturase)	EC:1.14.19.6 1.14.19.22	fve01040	Biosynthesis of unsaturated fatty acids	Metabolism	Lipid metabolism
TRINITY_DN17518_c0_g1	fve:101304893	91.1	8e-35	-	sm-like protein LSM1B	K12620	U6 snRNA-associated Sm-like protein LSm1	-	fve03018	RNA degradation	Genetic Information Processing	Folding, sorting and degradation
TRINITY_DN17518_c0_g2	tcc:18592046	64.7	4.7e-50	-	F-box protein GID2	K14495	F-box protein GID2	-	tcc04075	Plant hormone signal transduction	Environmental Information Processing	Signal transduction
TRINITY_DN17520_c0_g1	lja:Lj0g3v0330009.1	100	1.6e-59	Lj0g3v0330009.1	-	K02908	large subunit ribosomal protein L30e	-	lja03010	Ribosome	Genetic Information Processing	Translation
TRINITY_DN17521_c1_g1	boe:106327839	74.1	2.2e-25	-	transcription factor TCP21-like	K16221	transcription factor TCP21 (protein CCA1 HIKING EXPEDITION)	-	boe04712	Circadian rhythm - plant	Organismal Systems	Environmental adaptation
TRINITY_DN17521_c2_g1	hbr:110638166	64.8	1e-81	NA	NA	NA	NA	NA	NA	NA	NA	NA
TRINITY_DN17524_c0_g2	rcu:8281785	86.2	2.1e-06	NA	NA	NA	NA	NA	NA	NA	NA	NA
TRINITY_DN17525_c0_g1	osa:4346086	99.2	2.1e-71	-	60S ribosomal protein L32-1	K02912	large subunit ribosomal protein L32e	-	osa03010	Ribosome	Genetic Information Processing	Translation
TRINITY_DN17525_c0_g4	mus:103968478	87.8	7.6e-13	-	60S ribosomal protein L32-1-like	K02912	large subunit ribosomal protein L32e	-	mus03010	Ribosome	Genetic Information Processing	Translation
TRINITY_DN17527_c0_g1	smo:SELMODRAFT_107557	37.6	1.5e-21	-	hypothetical protein	K02183	calmodulin	-	smo04016	MAPK signaling pathway - plant	Environmental Information Processing	Signal transduction
TRINITY_DN17527_c0_g1	smo:SELMODRAFT_107557	37.6	1.5e-21	-	hypothetical protein	K02183	calmodulin	-	smo04070	Phosphatidylinositol signaling system	Environmental Information Processing	Signal transduction
TRINITY_DN17527_c0_g4	bvg:104904365	58.3	2.8e-25	NA	NA	NA	NA	NA	NA	NA	NA	NA
TRINITY_DN17527_c0_g8	ccaj:109800708	61.3	3.4e-19	NA	NA	NA	NA	NA	NA	NA	NA	NA
TRINITY_DN17528_c0_g1	aip:110266878	61.9	6.7e-07	-	uncharacterized protein LOC110266878	K02108	F-type H+-transporting ATPase subunit a	-	aip00190	Oxidative phosphorylation	Metabolism	Energy metabolism
TRINITY_DN17528_c0_g1	aip:110266878	61.9	6.7e-07	-	uncharacterized protein LOC110266878	K02108	F-type H+-transporting ATPase subunit a	-	aip00195	Photosynthesis	Metabolism	Energy metabolism
TRINITY_DN17529_c0_g3	vvi:100244670	74.8	5.4e-181	NA	NA	NA	NA	NA	NA	NA	NA	NA
TRINITY_DN17530_c0_g1	osa:4340887	99.1	2.1e-53	-	60S ribosomal protein L31	K02910	large subunit ribosomal protein L31e	-	osa03010	Ribosome	Genetic Information Processing	Translation
TRINITY_DN17530_c1_g1	gsl:Gasu_29510	61.3	6e-34	-	60S ribosomal protein L31e	K02910	large subunit ribosomal protein L31e	-	gsl03010	Ribosome	Genetic Information Processing	Translation
TRINITY_DN17530_c1_g2	pxb:103945849	67.7	3.6e-18	-	60S ribosomal protein L31-1-like	K02910	large subunit ribosomal protein L31e	-	pxb03010	Ribosome	Genetic Information Processing	Translation
TRINITY_DN17530_c2_g1	osa:4350976	100	5.2e-30	-	40S ribosomal protein S29	K02980	small subunit ribosomal protein S29e	-	osa03010	Ribosome	Genetic Information Processing	Translation
TRINITY_DN17533_c0_g1	pper:18783779	91.1	6.9e-131	-	60S ribosomal protein L7a-1	K02936	large subunit ribosomal protein L7Ae	-	pper03010	Ribosome	Genetic Information Processing	Translation
TRINITY_DN17536_c0_g2	nnu:104605900	62.9	2.5e-100	NA	NA	NA	NA	NA	NA	NA	NA	NA
TRINITY_DN17537_c0_g5	osa:4348731	100	1.2e-35	-	cell division control protein 48 homolog E	K13525	transitional endoplasmic reticulum ATPase	-	osa04141	Protein processing in endoplasmic reticulum	Genetic Information Processing	Folding, sorting and degradation
TRINITY_DN17540_c0_g1	vvi:100244238	82	6.6e-219	-	probable DNA primase large subunit	K02685	DNA primase large subunit	EC:2.7.7.-	vvi00230	Purine metabolism	Metabolism	Nucleotide metabolism
TRINITY_DN17540_c0_g1	vvi:100244238	82	6.6e-219	-	probable DNA primase large subunit	K02685	DNA primase large subunit	EC:2.7.7.-	vvi00240	Pyrimidine metabolism	Metabolism	Nucleotide metabolism
TRINITY_DN17540_c0_g1	vvi:100244238	82	6.6e-219	-	probable DNA primase large subunit	K02685	DNA primase large subunit	EC:2.7.7.-	vvi03030	DNA replication	Genetic Information Processing	Replication and repair
TRINITY_DN17541_c0_g1	cic:CICLE_v10010628mg	71.9	7.6e-80	NA	NA	NA	NA	NA	NA	NA	NA	NA
TRINITY_DN17541_c2_g1	sind:105173756	81.2	1.2e-235	NA	NA	NA	NA	NA	NA	NA	NA	NA
TRINITY_DN17541_c2_g2	sind:105162488	64.5	1.2e-146	-	uncharacterized protein LOC105162488	K10666	E3 ubiquitin-protein ligase RNF5	EC:2.3.2.27	sind04141	Protein processing in endoplasmic reticulum	Genetic Information Processing	Folding, sorting and degradation
TRINITY_DN17542_c0_g1	tcc:18613823	55.3	4.2e-122	-	charged multivesicular body protein 7	K15053	charged multivesicular body protein 7	-	tcc04144	Endocytosis	Cellular Processes	Transport and catabolism
TRINITY_DN17543_c0_g3	csat:104726868	43	2.8e-13	-	ATPase 11	K01535	H+-transporting ATPase	EC:3.6.3.6	csat00190	Oxidative phosphorylation	Metabolism	Energy metabolism
TRINITY_DN17545_c0_g1	mdm:103423936	59.3	4.6e-263	-	ABC transporter B family member 11-like	K05658	ATP-binding cassette, subfamily B (MDR/TAP), member 1	EC:3.6.3.44	mdm02010	ABC transporters	Environmental Information Processing	Membrane transport
TRINITY_DN17546_c0_g1	cvr:CHLNCDRAFT_134697	29	2.9e-27	-	hypothetical protein	K12867	pre-mRNA-splicing factor SYF1	-	cvr03040	Spliceosome	Genetic Information Processing	Transcription
TRINITY_DN17547_c0_g1	vvi:100240999	54.9	2.2e-75	NA	NA	NA	NA	NA	NA	NA	NA	NA
TRINITY_DN17548_c0_g2	sly:101247250	48.5	2.3e-18	-	type I inositol polyphosphate 5-phosphatase 8	K20279	synaptojanin	EC:3.1.3.36	sly00562	Inositol phosphate metabolism	Metabolism	Carbohydrate metabolism
TRINITY_DN17548_c0_g2	sly:101247250	48.5	2.3e-18	-	type I inositol polyphosphate 5-phosphatase 8	K20279	synaptojanin	EC:3.1.3.36	sly04070	Phosphatidylinositol signaling system	Environmental Information Processing	Signal transduction
TRINITY_DN17548_c0_g3	sot:102587898	62.3	5.9e-114	-	type I inositol polyphosphate 5-phosphatase 8-like	K20279	synaptojanin	EC:3.1.3.36	sot00562	Inositol phosphate metabolism	Metabolism	Carbohydrate metabolism
TRINITY_DN17548_c0_g3	sot:102587898	62.3	5.9e-114	-	type I inositol polyphosphate 5-phosphatase 8-like	K20279	synaptojanin	EC:3.1.3.36	sot04070	Phosphatidylinositol signaling system	Environmental Information Processing	Signal transduction
TRINITY_DN17549_c0_g1	egr:104416134	64.3	2.7e-07	-	polygalacturonase	K01184	polygalacturonase	EC:3.2.1.15	egr00040	Pentose and glucuronate interconversions	Metabolism	Carbohydrate metabolism
TRINITY_DN17549_c0_g2	egr:104416134	64.3	5.2e-07	-	polygalacturonase	K01184	polygalacturonase	EC:3.2.1.15	egr00040	Pentose and glucuronate interconversions	Metabolism	Carbohydrate metabolism
TRINITY_DN1754_c0_g1	osa:4327647	100	1.6e-34	-	phospholipase D alpha 1	K01115	phospholipase D1/2	EC:3.1.4.4	osa00564	Glycerophospholipid metabolism	Metabolism	Lipid metabolism
TRINITY_DN1754_c0_g1	osa:4327647	100	1.6e-34	-	phospholipase D alpha 1	K01115	phospholipase D1/2	EC:3.1.4.4	osa00565	Ether lipid metabolism	Metabolism	Lipid metabolism
TRINITY_DN1754_c0_g1	osa:4327647	100	1.6e-34	-	phospholipase D alpha 1	K01115	phospholipase D1/2	EC:3.1.4.4	osa04144	Endocytosis	Cellular Processes	Transport and catabolism
TRINITY_DN17552_c0_g1	brp:103843349	39.7	4.3e-12	-	transcription factor PIF3-like	K12126	phytochrome-interacting factor 3	-	brp04075	Plant hormone signal transduction	Environmental Information Processing	Signal transduction
TRINITY_DN17552_c0_g1	brp:103843349	39.7	4.3e-12	-	transcription factor PIF3-like	K12126	phytochrome-interacting factor 3	-	brp04712	Circadian rhythm - plant	Organismal Systems	Environmental adaptation
TRINITY_DN17554_c0_g1	zma:109940410	50	3e-33	-	BTB/POZ and TAZ domain-containing protein 3	K02987	small subunit ribosomal protein S4e	-	zma03010	Ribosome	Genetic Information Processing	Translation
TRINITY_DN17557_c1_g2	rcu:8287396	73.6	6.4e-139	NA	NA	NA	NA	NA	NA	NA	NA	NA
TRINITY_DN17558_c0_g1	eus:EUTSA_v10022319mg	53.6	8.2e-166	-	hypothetical protein	K01599	uroporphyrinogen decarboxylase	EC:4.1.1.37	eus00860	Porphyrin and chlorophyll metabolism	Metabolism	Metabolism of cofactors and vitamins
TRINITY_DN17559_c1_g1	vvi:100244343	58.8	7.9e-26	NA	NA	NA	NA	NA	NA	NA	NA	NA
TRINITY_DN17562_c0_g2	mcha:111020941	82.2	6e-18	-	beta-hexosaminidase 2	K12373	hexosaminidase	EC:3.2.1.52	mcha00520	Amino sugar and nucleotide sugar metabolism	Metabolism	Carbohydrate metabolism
TRINITY_DN17562_c0_g2	mcha:111020941	82.2	6e-18	-	beta-hexosaminidase 2	K12373	hexosaminidase	EC:3.2.1.52	mcha00531	Glycosaminoglycan degradation	Metabolism	Glycan biosynthesis and metabolism
TRINITY_DN17562_c0_g2	mcha:111020941	82.2	6e-18	-	beta-hexosaminidase 2	K12373	hexosaminidase	EC:3.2.1.52	mcha00603	Glycosphingolipid biosynthesis - globo and isoglobo series	Metabolism	Glycan biosynthesis and metabolism
TRINITY_DN17562_c0_g2	mcha:111020941	82.2	6e-18	-	beta-hexosaminidase 2	K12373	hexosaminidase	EC:3.2.1.52	mcha00604	Glycosphingolipid biosynthesis - ganglio series	Metabolism	Glycan biosynthesis and metabolism
TRINITY_DN17562_c0_g2	mcha:111020941	82.2	6e-18	-	beta-hexosaminidase 2	K12373	hexosaminidase	EC:3.2.1.52	mcha00511	Other glycan degradation	Metabolism	Glycan biosynthesis and metabolism
TRINITY_DN17563_c0_g1	csl:COCSUDRAFT_59336	44.2	9.7e-20	NA	NA	NA	NA	NA	NA	NA	NA	NA
TRINITY_DN17564_c0_g2	nta:107779741	71.2	9.1e-121	NA	NA	NA	NA	NA	NA	NA	NA	NA
TRINITY_DN17570_c0_g2	tcc:18586597	74.3	2.5e-162	-	dihydrolipoyllysine-residue acetyltransferase component 1 of pyruvate dehydrogenase complex	K00627	pyruvate dehydrogenase E2 component (dihydrolipoamide acetyltransferase)	EC:2.3.1.12	tcc00010	Glycolysis / Gluconeogenesis	Metabolism	Carbohydrate metabolism
TRINITY_DN17570_c0_g2	tcc:18586597	74.3	2.5e-162	-	dihydrolipoyllysine-residue acetyltransferase component 1 of pyruvate dehydrogenase complex	K00627	pyruvate dehydrogenase E2 component (dihydrolipoamide acetyltransferase)	EC:2.3.1.12	tcc00020	Citrate cycle (TCA cycle)	Metabolism	Carbohydrate metabolism
TRINITY_DN17570_c0_g2	tcc:18586597	74.3	2.5e-162	-	dihydrolipoyllysine-residue acetyltransferase component 1 of pyruvate dehydrogenase complex	K00627	pyruvate dehydrogenase E2 component (dihydrolipoamide acetyltransferase)	EC:2.3.1.12	tcc00620	Pyruvate metabolism	Metabolism	Carbohydrate metabolism
TRINITY_DN17572_c0_g1	egu:105048026	87.8	1.1e-39	NA	NA	NA	NA	NA	NA	NA	NA	NA
TRINITY_DN17574_c0_g2	sind:105168000	73.3	1.5e-214	-	malonyl-CoA decarboxylase	K01578	malonyl-CoA decarboxylase	EC:4.1.1.9	sind00640	Propanoate metabolism	Metabolism	Carbohydrate metabolism
TRINITY_DN17574_c0_g2	sind:105168000	73.3	1.5e-214	-	malonyl-CoA decarboxylase	K01578	malonyl-CoA decarboxylase	EC:4.1.1.9	sind00410	beta-Alanine metabolism	Metabolism	Metabolism of other amino acids
TRINITY_DN17574_c0_g2	sind:105168000	73.3	1.5e-214	-	malonyl-CoA decarboxylase	K01578	malonyl-CoA decarboxylase	EC:4.1.1.9	sind04146	Peroxisome	Cellular Processes	Transport and catabolism
TRINITY_DN17576_c0_g1	sind:105163434	69.7	1.2e-53	NA	NA	NA	NA	NA	NA	NA	NA	NA
TRINITY_DN17578_c1_g6	egu:105039950	52.1	1.1e-16	-	acetolactate synthase 2	K01652	acetolactate synthase I/II/III large subunit	EC:2.2.1.6	egu00650	Butanoate metabolism	Metabolism	Carbohydrate metabolism
TRINITY_DN17578_c1_g6	egu:105039950	52.1	1.1e-16	-	acetolactate synthase 2	K01652	acetolactate synthase I/II/III large subunit	EC:2.2.1.6	egu00660	C5-Branched dibasic acid metabolism	Metabolism	Carbohydrate metabolism
TRINITY_DN17578_c1_g6	egu:105039950	52.1	1.1e-16	-	acetolactate synthase 2	K01652	acetolactate synthase I/II/III large subunit	EC:2.2.1.6	egu00290	Valine, leucine and isoleucine biosynthesis	Metabolism	Amino acid metabolism
TRINITY_DN17578_c1_g6	egu:105039950	52.1	1.1e-16	-	acetolactate synthase 2	K01652	acetolactate synthase I/II/III large subunit	EC:2.2.1.6	egu00770	Pantothenate and CoA biosynthesis	Metabolism	Metabolism of cofactors and vitamins
TRINITY_DN17579_c0_g1	gmx:100782279	98.6	2.9e-39	-	serine/threonine-protein phosphatase PP2A catalytic subunit	K04382	serine/threonine-protein phosphatase 2A catalytic subunit	EC:3.1.3.16	gmx03015	mRNA surveillance pathway	Genetic Information Processing	Translation
TRINITY_DN17579_c0_g1	gmx:100782279	98.6	2.9e-39	-	serine/threonine-protein phosphatase PP2A catalytic subunit	K04382	serine/threonine-protein phosphatase 2A catalytic subunit	EC:3.1.3.16	gmx04136	Autophagy - other eukaryotes	Cellular Processes	Transport and catabolism
TRINITY_DN17582_c0_g1	jcu:105630986	43.6	3.6e-45	NA	NA	NA	NA	NA	NA	NA	NA	NA
TRINITY_DN17585_c0_g1	bvg:104884826	58.9	2.4e-34	-	60S ribosomal protein L27-3	K02901	large subunit ribosomal protein L27e	-	bvg03010	Ribosome	Genetic Information Processing	Translation
TRINITY_DN17585_c0_g2	bvg:104884826	59.5	1.6e-38	-	60S ribosomal protein L27-3	K02901	large subunit ribosomal protein L27e	-	bvg03010	Ribosome	Genetic Information Processing	Translation
TRINITY_DN17588_c0_g1	sot:102603207	78.5	2.8e-137	-	3-dehydrosphinganine reductase TSC10A-like	K04708	3-dehydrosphinganine reductase	EC:1.1.1.102	sot00600	Sphingolipid metabolism	Metabolism	Lipid metabolism
TRINITY_DN17589_c1_g1	pper:18773640	91	3.4e-134	-	protein SUPPRESSOR OF K(+) TRANSPORT GROWTH DEFECT 1	K12196	vacuolar protein-sorting-associated protein 4	-	pper04144	Endocytosis	Cellular Processes	Transport and catabolism
TRINITY_DN17589_c1_g2	lang:109325572	92.3	2.9e-174	-	protein SUPPRESSOR OF K(+) TRANSPORT GROWTH DEFECT 1-like	K12196	vacuolar protein-sorting-associated protein 4	-	lang04144	Endocytosis	Cellular Processes	Transport and catabolism
TRINITY_DN17590_c0_g1	gmx:100794341	43.5	1.5e-33	-	BRCA1-A complex subunit BRE-like	K12173	BRCA1-A complex subunit BRE	-	gmx03440	Homologous recombination	Genetic Information Processing	Replication and repair
TRINITY_DN17591_c1_g1	han:110878369	78.4	2.7e-118	NA	NA	NA	NA	NA	NA	NA	NA	NA
TRINITY_DN17592_c1_g5	han:110868563	90.9	6.9e-39	-	60S ribosomal protein L10a-1	K02865	large subunit ribosomal protein L10Ae	-	han03010	Ribosome	Genetic Information Processing	Translation
TRINITY_DN17594_c0_g1	vvi:100260057	80.8	5.3e-283	NA	NA	NA	NA	NA	NA	NA	NA	NA
TRINITY_DN17598_c1_g1	nsy:104230525	85.6	1.8e-66	NA	NA	NA	NA	NA	NA	NA	NA	NA
TRINITY_DN17602_c1_g1	ghi:107955382	64.6	3.7e-22	NA	NA	NA	NA	NA	NA	NA	NA	NA
TRINITY_DN17602_c1_g3	ini:109168880	63.3	7.5e-24	NA	NA	NA	NA	NA	NA	NA	NA	NA
TRINITY_DN17602_c1_g4	vvi:100260624	49.3	1.4e-10	NA	NA	NA	NA	NA	NA	NA	NA	NA
TRINITY_DN17603_c1_g1	nta:107795930	84.3	4.3e-93	NA	NA	NA	NA	NA	NA	NA	NA	NA
TRINITY_DN17604_c2_g4	sind:105165333	88.3	3.7e-48	-	signal recognition particle 9 kDa protein	K03109	signal recognition particle subunit SRP9	-	sind03060	Protein export	Genetic Information Processing	Folding, sorting and degradation
TRINITY_DN17604_c2_g7	sind:105165333	86.4	9.3e-48	-	signal recognition particle 9 kDa protein	K03109	signal recognition particle subunit SRP9	-	sind03060	Protein export	Genetic Information Processing	Folding, sorting and degradation
TRINITY_DN17607_c0_g3	nto:104120109	84.3	6.1e-210	-	protein CLP1 homolog	K14399	polyribonucleotide 5'-hydroxyl-kinase	EC:2.7.1.78	nto03015	mRNA surveillance pathway	Genetic Information Processing	Translation
TRINITY_DN17609_c0_g11	sly:101251664	77.4	2.8e-126	-	pyridoxal 5'-phosphate synthase-like subunit PDX1.2	K06215	pyridoxal 5'-phosphate synthase pdxS subunit	EC:4.3.3.6	sly00750	Vitamin B6 metabolism	Metabolism	Metabolism of cofactors and vitamins
TRINITY_DN17609_c0_g6	spen:107012142	77.1	4.3e-132	-	pyridoxal 5'-phosphate synthase-like subunit PDX1.2	K06215	pyridoxal 5'-phosphate synthase pdxS subunit	EC:4.3.3.6	spen00750	Vitamin B6 metabolism	Metabolism	Metabolism of cofactors and vitamins
TRINITY_DN17609_c0_g9	han:110879833	93.3	2.2e-35	-	probable pyridoxal 5'-phosphate synthase subunit PDX1	K06215	pyridoxal 5'-phosphate synthase pdxS subunit	EC:4.3.3.6	han00750	Vitamin B6 metabolism	Metabolism	Metabolism of cofactors and vitamins
TRINITY_DN17611_c0_g2	cann:107875357	72.3	5.9e-184	NA	NA	NA	NA	NA	NA	NA	NA	NA
TRINITY_DN17612_c0_g2	nta:107807655	81.9	1.4e-120	NA	NA	NA	NA	NA	NA	NA	NA	NA
TRINITY_DN17613_c1_g4	zju:107405179	74.6	2.8e-83	NA	NA	NA	NA	NA	NA	NA	NA	NA
TRINITY_DN17615_c0_g2	nnu:104595865	84.4	2.1e-62	-	autophagy-related protein 101-like	K19730	autophagy-related protein 101	-	nnu04136	Autophagy - other eukaryotes	Cellular Processes	Transport and catabolism
TRINITY_DN17615_c0_g8	mcha:111023094	62.4	2.5e-53	NA	NA	NA	NA	NA	NA	NA	NA	NA
TRINITY_DN17615_c0_g9	nta:107785532	73	1.6e-27	NA	NA	NA	NA	NA	NA	NA	NA	NA
TRINITY_DN17616_c0_g3	adu:107490771	98	3.2e-82	-	eukaryotic peptide chain release factor subunit 1-3 isoform X1	K03265	peptide chain release factor subunit 1	-	adu03015	mRNA surveillance pathway	Genetic Information Processing	Translation
TRINITY_DN17616_c0_g5	sbi:8062938	95.4	3.8e-242	-	eukaryotic peptide chain release factor subunit 1-3	K03265	peptide chain release factor subunit 1	-	sbi03015	mRNA surveillance pathway	Genetic Information Processing	Translation
TRINITY_DN17619_c0_g3	aly:ARALYDRAFT_336019	39.7	8.9e-18	-	hypothetical protein	K03036	26S proteasome regulatory subunit N6	-	aly03050	Proteasome	Genetic Information Processing	Folding, sorting and degradation
TRINITY_DN17619_c0_g4	sind:105176302	66.3	6.1e-58	NA	NA	NA	NA	NA	NA	NA	NA	NA
TRINITY_DN17624_c1_g2	gra:105788149	91.5	2e-159	NA	NA	NA	NA	NA	NA	NA	NA	NA
TRINITY_DN17624_c1_g4	nta:107818324	88.1	2.3e-157	NA	NA	NA	NA	NA	NA	NA	NA	NA
TRINITY_DN17627_c1_g2	dct:110097844	53.5	1.4e-45	NA	NA	NA	NA	NA	NA	NA	NA	NA
TRINITY_DN17627_c1_g3	dct:110097844	77.6	1.9e-67	NA	NA	NA	NA	NA	NA	NA	NA	NA
TRINITY_DN17627_c1_g6	ini:109190734	35.3	3.1e-38	NA	NA	NA	NA	NA	NA	NA	NA	NA
TRINITY_DN17627_c1_g7	dct:110097844	53.8	3.2e-58	NA	NA	NA	NA	NA	NA	NA	NA	NA
TRINITY_DN17628_c0_g3	sbi:110435403	68.7	8.6e-48	-	mitogen-activated protein kinase kinase 5-like	K13413	mitogen-activated protein kinase kinase 4/5	EC:2.7.12.2	sbi04016	MAPK signaling pathway - plant	Environmental Information Processing	Signal transduction
TRINITY_DN17628_c0_g3	sbi:110435403	68.7	8.6e-48	-	mitogen-activated protein kinase kinase 5-like	K13413	mitogen-activated protein kinase kinase 4/5	EC:2.7.12.2	sbi04075	Plant hormone signal transduction	Environmental Information Processing	Signal transduction
TRINITY_DN17628_c0_g3	sbi:110435403	68.7	8.6e-48	-	mitogen-activated protein kinase kinase 5-like	K13413	mitogen-activated protein kinase kinase 4/5	EC:2.7.12.2	sbi04626	Plant-pathogen interaction	Organismal Systems	Environmental adaptation
TRINITY_DN17630_c1_g4	spen:107012202	36.4	7e-14	-	putative DNA glycosylase At3g47830	K10773	endonuclease III	EC:4.2.99.18	spen03410	Base excision repair	Genetic Information Processing	Replication and repair
TRINITY_DN17630_c1_g5	spen:107012202	34.6	2.1e-13	-	putative DNA glycosylase At3g47830	K10773	endonuclease III	EC:4.2.99.18	spen03410	Base excision repair	Genetic Information Processing	Replication and repair
TRINITY_DN17632_c0_g1	nto:104110075	60.4	1.8e-91	NA	NA	NA	NA	NA	NA	NA	NA	NA
TRINITY_DN17634_c0_g10	hbr:110668667	60.3	4.7e-16	NA	NA	NA	NA	NA	NA	NA	NA	NA
TRINITY_DN17634_c0_g2	hbr:110647681	85.5	1.1e-37	NA	NA	NA	NA	NA	NA	NA	NA	NA
TRINITY_DN17641_c1_g1	ini:109176120	94.5	1.7e-67	NA	NA	NA	NA	NA	NA	NA	NA	NA
TRINITY_DN17641_c1_g3	ini:109176120	94.8	2e-61	NA	NA	NA	NA	NA	NA	NA	NA	NA
TRINITY_DN17641_c2_g4	hbr:110659116	37.1	7.8e-110	NA	NA	NA	NA	NA	NA	NA	NA	NA
TRINITY_DN17644_c3_g2	nta:107824709	45.6	8.9e-10	-	uncharacterized LOC107824709	K10643	CCR4-NOT transcription complex subunit 4	EC:2.3.2.27	nta03018	RNA degradation	Genetic Information Processing	Folding, sorting and degradation
TRINITY_DN17647_c0_g1	sind:105163933	91.9	5.4e-47	NA	NA	NA	NA	NA	NA	NA	NA	NA
TRINITY_DN17648_c0_g1	sind:105172148	58.3	1.2e-161	NA	NA	NA	NA	NA	NA	NA	NA	NA
TRINITY_DN17650_c1_g1	sind:105156391	76.3	0	NA	NA	NA	NA	NA	NA	NA	NA	NA
TRINITY_DN17650_c1_g4	rcu:8285792	76.4	4.7e-132	NA	NA	NA	NA	NA	NA	NA	NA	NA
TRINITY_DN17653_c0_g1	mcha:111009218	78.3	8.4e-23	NA	NA	NA	NA	NA	NA	NA	NA	NA
TRINITY_DN17654_c0_g1	sind:105157869	65.3	1.4e-46	-	17.4 kDa class III heat shock protein	K13993	HSP20 family protein	-	sind04141	Protein processing in endoplasmic reticulum	Genetic Information Processing	Folding, sorting and degradation
TRINITY_DN17660_c0_g2	nta:107797193	73.2	3.3e-10	NA	NA	NA	NA	NA	NA	NA	NA	NA
TRINITY_DN17663_c1_g10	rcu:8268204	86.8	1.3e-85	NA	NA	NA	NA	NA	NA	NA	NA	NA
TRINITY_DN17663_c1_g3	vvi:100251093	67	1.4e-107	NA	NA	NA	NA	NA	NA	NA	NA	NA
TRINITY_DN17663_c1_g4	adu:107477212	83.9	9.2e-24	NA	NA	NA	NA	NA	NA	NA	NA	NA
TRINITY_DN17665_c1_g1	gra:105782152	74	8.9e-60	-	40S ribosomal protein S16-like	K02960	small subunit ribosomal protein S16e	-	gra03010	Ribosome	Genetic Information Processing	Translation
TRINITY_DN17669_c0_g5	thj:104811869	49.2	2.7e-30	-	early nodulin-like protein 2	K03006	DNA-directed RNA polymerase II subunit RPB1	EC:2.7.7.6	thj00230	Purine metabolism	Metabolism	Nucleotide metabolism
TRINITY_DN17669_c0_g5	thj:104811869	49.2	2.7e-30	-	early nodulin-like protein 2	K03006	DNA-directed RNA polymerase II subunit RPB1	EC:2.7.7.6	thj00240	Pyrimidine metabolism	Metabolism	Nucleotide metabolism
TRINITY_DN17669_c0_g5	thj:104811869	49.2	2.7e-30	-	early nodulin-like protein 2	K03006	DNA-directed RNA polymerase II subunit RPB1	EC:2.7.7.6	thj03020	RNA polymerase	Genetic Information Processing	Transcription
TRINITY_DN17671_c1_g1	vvi:100258505	81.8	0	NA	NA	NA	NA	NA	NA	NA	NA	NA
TRINITY_DN17672_c1_g1	aly:ARALYDRAFT_315784	55.2	4e-62	NA	NA	NA	NA	NA	NA	NA	NA	NA
TRINITY_DN17673_c0_g3	cann:107866355	61.5	2.1e-108	-	glyoxylate/hydroxypyruvate reductase HPR3-like	K15919	hydroxypyruvate reductase 2	-	cann00630	Glyoxylate and dicarboxylate metabolism	Metabolism	Carbohydrate metabolism
TRINITY_DN17673_c0_g3	cann:107866355	61.5	2.1e-108	-	glyoxylate/hydroxypyruvate reductase HPR3-like	K15919	hydroxypyruvate reductase 2	-	cann00260	Glycine, serine and threonine metabolism	Metabolism	Amino acid metabolism
TRINITY_DN17673_c0_g5	soe:110790573	63.1	1.2e-21	NA	NA	NA	NA	NA	NA	NA	NA	NA
TRINITY_DN17675_c2_g1	han:110894891	80.2	8.4e-153	NA	NA	NA	NA	NA	NA	NA	NA	NA
TRINITY_DN17675_c2_g4	cvr:CHLNCDRAFT_141917	69.1	7.9e-17	-	hypothetical protein	K06236	collagen, type I, alpha	-	cvr04933	AGE-RAGE signaling pathway in diabetic complications	Human Diseases	Endocrine and metabolic diseases
TRINITY_DN17677_c0_g1	vvi:100242807	75	2.7e-290	NA	NA	NA	NA	NA	NA	NA	NA	NA
TRINITY_DN17684_c0_g2	tcc:18598126	84.6	6.2e-65	-	60S ribosomal protein L24	K02896	large subunit ribosomal protein L24e	-	tcc03010	Ribosome	Genetic Information Processing	Translation
TRINITY_DN17685_c0_g1	nnu:104608881	49.2	2.8e-13	-	N-acetylglucosaminyl-phosphatidylinositol biosynthetic protein gpi1-like	K03860	phosphatidylinositol glycan, class Q	-	nnu00563	Glycosylphosphatidylinositol(GPI)-anchor biosynthesis	Metabolism	Glycan biosynthesis and metabolism
TRINITY_DN17685_c0_g7	tcc:18590935	92.1	2.8e-75	-	high-affinity nitrate transporter 2.1	K02575	MFS transporter, NNP family, nitrate/nitrite transporter	-	tcc00910	Nitrogen metabolism	Metabolism	Energy metabolism
TRINITY_DN17688_c0_g1	lang:109329464	45.7	4.4e-48	-	berberine bridge enzyme-like 21	K01187	alpha-glucosidase	EC:3.2.1.20	lang00052	Galactose metabolism	Metabolism	Carbohydrate metabolism
TRINITY_DN17688_c0_g1	lang:109329464	45.7	4.4e-48	-	berberine bridge enzyme-like 21	K01187	alpha-glucosidase	EC:3.2.1.20	lang00500	Starch and sucrose metabolism	Metabolism	Carbohydrate metabolism
TRINITY_DN17688_c0_g2	lang:109329464	37	7.3e-52	-	berberine bridge enzyme-like 21	K01187	alpha-glucosidase	EC:3.2.1.20	lang00052	Galactose metabolism	Metabolism	Carbohydrate metabolism
TRINITY_DN17688_c0_g2	lang:109329464	37	7.3e-52	-	berberine bridge enzyme-like 21	K01187	alpha-glucosidase	EC:3.2.1.20	lang00500	Starch and sucrose metabolism	Metabolism	Carbohydrate metabolism
TRINITY_DN17692_c2_g1	han:110879724	80.1	1.6e-124	-	tRNase Z TRZ1	K00784	ribonuclease Z	EC:3.1.26.11	han03013	RNA transport	Genetic Information Processing	Translation
TRINITY_DN17694_c0_g1	osa:4336294	99.7	2.7e-234	-	S-adenosylmethionine decarboxylase proenzyme isoform X1	K01611	S-adenosylmethionine decarboxylase	EC:4.1.1.50	osa00270	Cysteine and methionine metabolism	Metabolism	Amino acid metabolism
TRINITY_DN17694_c0_g1	osa:4336294	99.7	2.7e-234	-	S-adenosylmethionine decarboxylase proenzyme isoform X1	K01611	S-adenosylmethionine decarboxylase	EC:4.1.1.50	osa00330	Arginine and proline metabolism	Metabolism	Amino acid metabolism
TRINITY_DN17694_c0_g2	zma:542733	100	1.3e-47	sam2	S-adenosylmethionine decarboxylase proenzyme	K01611	S-adenosylmethionine decarboxylase	EC:4.1.1.50	zma00270	Cysteine and methionine metabolism	Metabolism	Amino acid metabolism
TRINITY_DN17694_c0_g2	zma:542733	100	1.3e-47	sam2	S-adenosylmethionine decarboxylase proenzyme	K01611	S-adenosylmethionine decarboxylase	EC:4.1.1.50	zma00330	Arginine and proline metabolism	Metabolism	Amino acid metabolism
TRINITY_DN17697_c1_g1	hbr:110661414	78.3	9.8e-113	-	ribosome maturation protein SBDS isoform X1	K14574	ribosome maturation protein SDO1	-	hbr03008	Ribosome biogenesis in eukaryotes	Genetic Information Processing	Translation
TRINITY_DN17697_c1_g4	han:110936648	94.3	2.1e-49	-	ribosome maturation protein SBDS	K14574	ribosome maturation protein SDO1	-	han03008	Ribosome biogenesis in eukaryotes	Genetic Information Processing	Translation
TRINITY_DN17699_c0_g2	cit:102612107	39	1.7e-83	NA	NA	NA	NA	NA	NA	NA	NA	NA
TRINITY_DN17704_c1_g1	gmx:100785602	98.4	3.2e-286	NA	NA	NA	NA	NA	NA	NA	NA	NA
TRINITY_DN17706_c0_g1	nsy:104231279	59.1	1.8e-127	-	serine/threonine-protein kinase OXI1-like	K20714	serine/threonine-protein kinase OXI1	EC:2.7.11.1	nsy04016	MAPK signaling pathway - plant	Environmental Information Processing	Signal transduction
TRINITY_DN17706_c0_g5	sind:105179665	61.5	0	NA	NA	NA	NA	NA	NA	NA	NA	NA
TRINITY_DN17707_c1_g4	ath:AT1G80070	85.9	2.1e-37	SUS2	Pre-mRNA-processing-splicing factor	K12856	pre-mRNA-processing factor 8	-	ath03040	Spliceosome	Genetic Information Processing	Transcription
TRINITY_DN17709_c0_g2	vvi:100254107	58	7.6e-144	NA	NA	NA	NA	NA	NA	NA	NA	NA
TRINITY_DN17710_c0_g1	vcn:VOLCADRAFT_106802	56.2	3.5e-30	NA	NA	NA	NA	NA	NA	NA	NA	NA
TRINITY_DN17713_c2_g9	pvu:PHAVU_007G015800g	96.7	1.2e-07	NA	NA	NA	NA	NA	NA	NA	NA	NA
TRINITY_DN17716_c0_g1	pvu:PHAVU_002G262100g	79.3	7.9e-21	-	hypothetical protein	K15849	bifunctional aspartate aminotransferase and glutamate/aspartate-prephenate aminotransferase	EC:2.6.1.1 2.6.1.78 2.6.1.79	pvu00350	Tyrosine metabolism	Metabolism	Amino acid metabolism
TRINITY_DN17716_c0_g1	pvu:PHAVU_002G262100g	79.3	7.9e-21	-	hypothetical protein	K15849	bifunctional aspartate aminotransferase and glutamate/aspartate-prephenate aminotransferase	EC:2.6.1.1 2.6.1.78 2.6.1.79	pvu00360	Phenylalanine metabolism	Metabolism	Amino acid metabolism
TRINITY_DN17716_c0_g1	pvu:PHAVU_002G262100g	79.3	7.9e-21	-	hypothetical protein	K15849	bifunctional aspartate aminotransferase and glutamate/aspartate-prephenate aminotransferase	EC:2.6.1.1 2.6.1.78 2.6.1.79	pvu00400	Phenylalanine, tyrosine and tryptophan biosynthesis	Metabolism	Amino acid metabolism
TRINITY_DN17716_c0_g1	pvu:PHAVU_002G262100g	79.3	7.9e-21	-	hypothetical protein	K15849	bifunctional aspartate aminotransferase and glutamate/aspartate-prephenate aminotransferase	EC:2.6.1.1 2.6.1.78 2.6.1.79	pvu00950	Isoquinoline alkaloid biosynthesis	Metabolism	Biosynthesis of other secondary metabolites
TRINITY_DN17716_c0_g1	pvu:PHAVU_002G262100g	79.3	7.9e-21	-	hypothetical protein	K15849	bifunctional aspartate aminotransferase and glutamate/aspartate-prephenate aminotransferase	EC:2.6.1.1 2.6.1.78 2.6.1.79	pvu00960	Tropane, piperidine and pyridine alkaloid biosynthesis	Metabolism	Biosynthesis of other secondary metabolites
TRINITY_DN17717_c1_g1	spen:107017635	83.4	4.3e-241	-	glutamyl-tRNA reductase 1	K02492	glutamyl-tRNA reductase	EC:1.2.1.70	spen00860	Porphyrin and chlorophyll metabolism	Metabolism	Metabolism of cofactors and vitamins
TRINITY_DN17717_c1_g4	spen:107017635	85	9.9e-107	-	glutamyl-tRNA reductase 1	K02492	glutamyl-tRNA reductase	EC:1.2.1.70	spen00860	Porphyrin and chlorophyll metabolism	Metabolism	Metabolism of cofactors and vitamins
TRINITY_DN17718_c1_g1	sind:105170808	83.6	5.6e-236	-	sulfite reductase 1 [ferredoxin]	K00392	sulfite reductase (ferredoxin)	EC:1.8.7.1	sind00920	Sulfur metabolism	Metabolism	Energy metabolism
TRINITY_DN17718_c1_g2	vvi:100245032	83.9	0	-	sulfite reductase 1 [ferredoxin]	K00392	sulfite reductase (ferredoxin)	EC:1.8.7.1	vvi00920	Sulfur metabolism	Metabolism	Energy metabolism
TRINITY_DN17722_c1_g1	hbr:110652696	58.5	1.8e-37	-	probable WRKY transcription factor 33	K13424	WRKY transcription factor 33	-	hbr04016	MAPK signaling pathway - plant	Environmental Information Processing	Signal transduction
TRINITY_DN17722_c1_g1	hbr:110652696	58.5	1.8e-37	-	probable WRKY transcription factor 33	K13424	WRKY transcription factor 33	-	hbr04626	Plant-pathogen interaction	Organismal Systems	Environmental adaptation
TRINITY_DN17722_c2_g1	vvi:100240824	75.4	0	PHYA	phytochrome A	K12120	phytochrome A	-	vvi04712	Circadian rhythm - plant	Organismal Systems	Environmental adaptation
TRINITY_DN17722_c2_g3	nto:104113617	71.2	2.3e-129	-	phytochrome A1	K12120	phytochrome A	-	nto04712	Circadian rhythm - plant	Organismal Systems	Environmental adaptation
TRINITY_DN17727_c0_g2	jcu:105628242	85.3	4.9e-177	-	inner membrane protein PPF-1	K03217	YidC/Oxa1 family membrane protein insertase	-	jcu03060	Protein export	Genetic Information Processing	Folding, sorting and degradation
TRINITY_DN17729_c1_g1	han:110885838	85.9	4.6e-32	NA	NA	NA	NA	NA	NA	NA	NA	NA
TRINITY_DN17729_c1_g2	vvi:100263408	82.1	5.4e-26	NA	NA	NA	NA	NA	NA	NA	NA	NA
TRINITY_DN17729_c1_g3	cpap:110821200	78.7	3.1e-15	-	acyl-protein thioesterase 2 isoform X1	K06130	lysophospholipase II	EC:3.1.1.5	cpap00564	Glycerophospholipid metabolism	Metabolism	Lipid metabolism
TRINITY_DN17730_c0_g1	spen:107021138	72.7	2.7e-73	-	molybdopterin synthase catalytic subunit	K03635	molybdopterin synthase catalytic subunit	EC:2.8.1.12	spen00790	Folate biosynthesis	Metabolism	Metabolism of cofactors and vitamins
TRINITY_DN17730_c0_g1	spen:107021138	72.7	2.7e-73	-	molybdopterin synthase catalytic subunit	K03635	molybdopterin synthase catalytic subunit	EC:2.8.1.12	spen04122	Sulfur relay system	Genetic Information Processing	Folding, sorting and degradation
TRINITY_DN17731_c0_g1	lja:Lj3g3v2811140.1	43.7	1.5e-09	NA	NA	NA	NA	NA	NA	NA	NA	NA
TRINITY_DN17731_c0_g2	lja:Lj3g3v2811140.1	60.5	8e-20	NA	NA	NA	NA	NA	NA	NA	NA	NA
TRINITY_DN17731_c0_g3	lja:Lj3g3v2811140.1	51.4	4.2e-41	NA	NA	NA	NA	NA	NA	NA	NA	NA
TRINITY_DN17732_c0_g2	osa:4339593	100	4.2e-29	-	photosystem I reaction center subunit VI	K02695	photosystem I subunit VI	-	osa00195	Photosynthesis	Metabolism	Energy metabolism
TRINITY_DN17732_c1_g1	ini:109187489	30.4	2e-17	-	pectinesterase-like	K01051	pectinesterase	EC:3.1.1.11	ini00040	Pentose and glucuronate interconversions	Metabolism	Carbohydrate metabolism
TRINITY_DN17732_c1_g3	gra:105788568	88.6	6.2e-224	-	glutamate dehydrogenase 2	K00261	glutamate dehydrogenase (NAD(P)+)	EC:1.4.1.3	gra00910	Nitrogen metabolism	Metabolism	Energy metabolism
TRINITY_DN17732_c1_g3	gra:105788568	88.6	6.2e-224	-	glutamate dehydrogenase 2	K00261	glutamate dehydrogenase (NAD(P)+)	EC:1.4.1.3	gra00250	Alanine, aspartate and glutamate metabolism	Metabolism	Amino acid metabolism
TRINITY_DN17732_c1_g3	gra:105788568	88.6	6.2e-224	-	glutamate dehydrogenase 2	K00261	glutamate dehydrogenase (NAD(P)+)	EC:1.4.1.3	gra00220	Arginine biosynthesis	Metabolism	Amino acid metabolism
TRINITY_DN17732_c1_g3	gra:105788568	88.6	6.2e-224	-	glutamate dehydrogenase 2	K00261	glutamate dehydrogenase (NAD(P)+)	EC:1.4.1.3	gra00471	D-Glutamine and D-glutamate metabolism	Metabolism	Metabolism of other amino acids
TRINITY_DN17733_c0_g1	gmx:100784140	100	3.7e-83	-	40S ribosomal protein S11	K02949	small subunit ribosomal protein S11e	-	gmx03010	Ribosome	Genetic Information Processing	Translation
TRINITY_DN17737_c0_g1	sind:105155196	80.9	8.5e-38	-	protein disulfide-isomerase 5-1-like	K13984	thioredoxin domain-containing protein 5	-	sind04141	Protein processing in endoplasmic reticulum	Genetic Information Processing	Folding, sorting and degradation
TRINITY_DN17739_c0_g3	han:110893992	44.2	1.1e-09	NA	NA	NA	NA	NA	NA	NA	NA	NA
TRINITY_DN17739_c0_g4	bna:111211206	61.2	3.3e-51	NA	NA	NA	NA	NA	NA	NA	NA	NA
TRINITY_DN17740_c1_g1	atr:18436888	39.8	1.2e-94	NA	NA	NA	NA	NA	NA	NA	NA	NA
TRINITY_DN17741_c0_g1	rcu:8287629	85.7	3e-42	-	small ubiquitin-related modifier 1	K12160	small ubiquitin-related modifier	-	rcu03013	RNA transport	Genetic Information Processing	Translation
TRINITY_DN17741_c0_g4	aip:107609035	87.8	7.5e-43	-	small ubiquitin-related modifier 2	K12160	small ubiquitin-related modifier	-	aip03013	RNA transport	Genetic Information Processing	Translation
TRINITY_DN17743_c0_g1	ghi:107950214	90.4	1.8e-130	-	proliferating cell nuclear antigen	K04802	proliferating cell nuclear antigen	-	ghi03030	DNA replication	Genetic Information Processing	Replication and repair
TRINITY_DN17743_c0_g1	ghi:107950214	90.4	1.8e-130	-	proliferating cell nuclear antigen	K04802	proliferating cell nuclear antigen	-	ghi03410	Base excision repair	Genetic Information Processing	Replication and repair
TRINITY_DN17743_c0_g1	ghi:107950214	90.4	1.8e-130	-	proliferating cell nuclear antigen	K04802	proliferating cell nuclear antigen	-	ghi03420	Nucleotide excision repair	Genetic Information Processing	Replication and repair
TRINITY_DN17743_c0_g1	ghi:107950214	90.4	1.8e-130	-	proliferating cell nuclear antigen	K04802	proliferating cell nuclear antigen	-	ghi03430	Mismatch repair	Genetic Information Processing	Replication and repair
TRINITY_DN17744_c1_g3	mcha:111010887	41	1.6e-09	-	(3S	K14175	(3S,6E)-nerolidol synthase	EC:4.2.3.48	mcha00909	Sesquiterpenoid and triterpenoid biosynthesis	Metabolism	Metabolism of terpenoids and polyketides
TRINITY_DN17747_c1_g1	adu:107464202	95.5	1.2e-80	-	serine/threonine protein phosphatase 2A 55 kDa regulatory subunit B beta isoform isoform X1	K04354	serine/threonine-protein phosphatase 2A regulatory subunit B	-	adu03015	mRNA surveillance pathway	Genetic Information Processing	Translation
TRINITY_DN17747_c1_g2	mdm:103453547	90.4	9.2e-66	-	serine/threonine protein phosphatase 2A 55 kDa regulatory subunit B beta isoform-like	K04354	serine/threonine-protein phosphatase 2A regulatory subunit B	-	mdm03015	mRNA surveillance pathway	Genetic Information Processing	Translation
TRINITY_DN17747_c1_g5	mcha:111016447	69.5	1.5e-27	-	serine/threonine protein phosphatase 2A 55 kDa regulatory subunit B beta isoform-like	K04354	serine/threonine-protein phosphatase 2A regulatory subunit B	-	mcha03015	mRNA surveillance pathway	Genetic Information Processing	Translation
TRINITY_DN17747_c1_g6	sot:102586381	94.4	2e-93	-	serine/threonine protein phosphatase 2A 55 kDa regulatory subunit B beta isoform-like	K04354	serine/threonine-protein phosphatase 2A regulatory subunit B	-	sot03015	mRNA surveillance pathway	Genetic Information Processing	Translation
TRINITY_DN17747_c1_g7	osa:9270873	100	1.4e-33	-	serine/threonine protein phosphatase 2A 55 kDa regulatory subunit B beta isoform-like	K04354	serine/threonine-protein phosphatase 2A regulatory subunit B	-	osa03015	mRNA surveillance pathway	Genetic Information Processing	Translation
TRINITY_DN17748_c0_g1	csat:104723377	45	2.7e-37	-	isoleucine--tRNA ligase	K01870	isoleucyl-tRNA synthetase	EC:6.1.1.5	csat00970	Aminoacyl-tRNA biosynthesis	Genetic Information Processing	Translation
TRINITY_DN17748_c0_g2	csat:104723377	48.4	2.7e-42	-	isoleucine--tRNA ligase	K01870	isoleucyl-tRNA synthetase	EC:6.1.1.5	csat00970	Aminoacyl-tRNA biosynthesis	Genetic Information Processing	Translation
TRINITY_DN17750_c1_g1	smo:SELMODRAFT_152770	35.4	2.8e-09	NA	NA	NA	NA	NA	NA	NA	NA	NA
TRINITY_DN17753_c1_g2	nto:104114954	71.9	4.5e-240	-	regulatory-associated protein of TOR 1 isoform X2	K07204	regulatory associated protein of mTOR	-	nto04136	Autophagy - other eukaryotes	Cellular Processes	Transport and catabolism
TRINITY_DN17753_c1_g5	hbr:110632691	62.8	5.5e-21	NA	NA	NA	NA	NA	NA	NA	NA	NA
TRINITY_DN17755_c0_g1	vvi:100257028	75.5	2.4e-72	-	heparanase-like protein 1	K07964	heparanase	EC:3.2.1.166	vvi00531	Glycosaminoglycan degradation	Metabolism	Glycan biosynthesis and metabolism
TRINITY_DN17756_c0_g2	ghi:107917792	99.4	6.1e-194	NA	NA	NA	NA	NA	NA	NA	NA	NA
TRINITY_DN17757_c1_g2	gmx:100799894	96.2	1.4e-21	-	cationic peroxidase 1-like	K00430	peroxidase	EC:1.11.1.7	gmx00940	Phenylpropanoid biosynthesis	Metabolism	Biosynthesis of other secondary metabolites
TRINITY_DN17759_c0_g2	rcu:8282153	41.9	6.3e-06	NA	NA	NA	NA	NA	NA	NA	NA	NA
TRINITY_DN17764_c1_g1	zju:107412424	75.2	2.5e-53	NA	NA	NA	NA	NA	NA	NA	NA	NA
TRINITY_DN17765_c0_g1	sind:105164179	60.3	3.1e-79	-	DNA-directed RNA polymerase III subunit 1 isoform X1	K03018	DNA-directed RNA polymerase III subunit RPC1	EC:2.7.7.6	sind00230	Purine metabolism	Metabolism	Nucleotide metabolism
TRINITY_DN17765_c0_g1	sind:105164179	60.3	3.1e-79	-	DNA-directed RNA polymerase III subunit 1 isoform X1	K03018	DNA-directed RNA polymerase III subunit RPC1	EC:2.7.7.6	sind00240	Pyrimidine metabolism	Metabolism	Nucleotide metabolism
TRINITY_DN17765_c0_g1	sind:105164179	60.3	3.1e-79	-	DNA-directed RNA polymerase III subunit 1 isoform X1	K03018	DNA-directed RNA polymerase III subunit RPC1	EC:2.7.7.6	sind03020	RNA polymerase	Genetic Information Processing	Transcription
TRINITY_DN17766_c1_g2	osa:4338812	100	3.1e-62	NA	NA	NA	NA	NA	NA	NA	NA	NA
TRINITY_DN17767_c1_g1	nto:104102207	52.9	2.5e-146	-	cytochrome P450 71A22-like	K07418	cytochrome P450 family 2 subfamily J	EC:1.14.14.1 1.14.14.73 1.14.14.74 1.14.14.75	nto00590	Arachidonic acid metabolism	Metabolism	Lipid metabolism
TRINITY_DN17767_c1_g1	nto:104102207	52.9	2.5e-146	-	cytochrome P450 71A22-like	K07418	cytochrome P450 family 2 subfamily J	EC:1.14.14.1 1.14.14.73 1.14.14.74 1.14.14.75	nto00591	Linoleic acid metabolism	Metabolism	Lipid metabolism
TRINITY_DN17769_c0_g2	nsy:104219362	72.2	2.2e-201	NA	NA	NA	NA	NA	NA	NA	NA	NA
TRINITY_DN17771_c0_g2	osa:4329493	100	2.8e-128	NA	NA	NA	NA	NA	NA	NA	NA	NA
TRINITY_DN17772_c0_g3	mtr:MTR_7g099640	98.4	2e-167	-	regulatory particle triple-A ATPase	K03062	26S proteasome regulatory subunit T2	-	mtr03050	Proteasome	Genetic Information Processing	Folding, sorting and degradation
TRINITY_DN17772_c0_g8	gmx:100798835	100	2.1e-32	-	26S proteasome regulatory subunit 4 homolog A	K03062	26S proteasome regulatory subunit T2	-	gmx03050	Proteasome	Genetic Information Processing	Folding, sorting and degradation
TRINITY_DN17775_c0_g1	gsl:Gasu_21170	28.4	5.8e-22	NA	NA	NA	NA	NA	NA	NA	NA	NA
TRINITY_DN17777_c0_g1	egr:104442281	33.8	4.7e-09	NA	NA	NA	NA	NA	NA	NA	NA	NA
TRINITY_DN17779_c1_g2	vvi:100261031	99	2.9e-168	-	ATP synthase subunit beta	K02133	F-type H+-transporting ATPase subunit beta	EC:3.6.3.14	vvi00190	Oxidative phosphorylation	Metabolism	Energy metabolism
TRINITY_DN17782_c0_g2	nnu:104596571	71.8	3e-164	NA	NA	NA	NA	NA	NA	NA	NA	NA
TRINITY_DN17783_c0_g1	vvi:109124299	93	3.6e-30	-	ATP synthase subunit alpha	K02111	F-type H+-transporting ATPase subunit alpha	EC:3.6.3.14	vvi00190	Oxidative phosphorylation	Metabolism	Energy metabolism
TRINITY_DN17783_c0_g1	vvi:109124299	93	3.6e-30	-	ATP synthase subunit alpha	K02111	F-type H+-transporting ATPase subunit alpha	EC:3.6.3.14	vvi00195	Photosynthesis	Metabolism	Energy metabolism
TRINITY_DN17784_c1_g2	sind:105159686	56.4	1.3e-61	-	delta(12)-fatty-acid desaturase FAD2	K10256	omega-6 fatty acid desaturase / acyl-lipid omega-6 desaturase (Delta-12 desaturase)	EC:1.14.19.6 1.14.19.22	sind01040	Biosynthesis of unsaturated fatty acids	Metabolism	Lipid metabolism
TRINITY_DN17785_c0_g2	nta:107807528	67.8	1.3e-22	-	uncharacterized LOC107807528	K03137	transcription initiation factor TFIIE subunit beta	-	nta03022	Basal transcription factors	Genetic Information Processing	Transcription
TRINITY_DN17786_c0_g2	brp:103836214	45.5	1.3e-16	-	glucan endo-1	K19891	glucan endo-1,3-beta-glucosidase 1/2/3	EC:3.2.1.39	brp00500	Starch and sucrose metabolism	Metabolism	Carbohydrate metabolism
TRINITY_DN17789_c0_g1	dct:110116159	84	1.4e-18	-	uncharacterized protein LOC110116159	K05349	beta-glucosidase	EC:3.2.1.21	dct00500	Starch and sucrose metabolism	Metabolism	Carbohydrate metabolism
TRINITY_DN17789_c0_g1	dct:110116159	84	1.4e-18	-	uncharacterized protein LOC110116159	K05349	beta-glucosidase	EC:3.2.1.21	dct00460	Cyanoamino acid metabolism	Metabolism	Metabolism of other amino acids
TRINITY_DN17789_c0_g1	dct:110116159	84	1.4e-18	-	uncharacterized protein LOC110116159	K05349	beta-glucosidase	EC:3.2.1.21	dct00940	Phenylpropanoid biosynthesis	Metabolism	Biosynthesis of other secondary metabolites
TRINITY_DN17791_c0_g5	atr:18436948	87.4	1.2e-91	-	40S ribosomal protein S7	K02993	small subunit ribosomal protein S7e	-	atr03010	Ribosome	Genetic Information Processing	Translation
TRINITY_DN17792_c0_g1	gmx:547911	100	3.6e-181	REDUCTASE	NAD(P)H dependent 6'-deoxychalcone synthase	K08243	Polyketide reductase	-	gmx00941	Flavonoid biosynthesis	Metabolism	Biosynthesis of other secondary metabolites
TRINITY_DN17793_c3_g5	dct:110109063	36.3	2.1e-11	NA	NA	NA	NA	NA	NA	NA	NA	NA
TRINITY_DN17793_c3_g6	nta:107791902	65.8	1.9e-82	NA	NA	NA	NA	NA	NA	NA	NA	NA
TRINITY_DN17795_c1_g1	fve:101304342	93.2	2.9e-80	-	ras-related protein Rab7	K07897	Ras-related protein Rab-7A	-	fve04144	Endocytosis	Cellular Processes	Transport and catabolism
TRINITY_DN17795_c1_g1	fve:101304342	93.2	2.9e-80	-	ras-related protein Rab7	K07897	Ras-related protein Rab-7A	-	fve04145	Phagosome	Cellular Processes	Transport and catabolism
TRINITY_DN17795_c1_g9	tcc:18600873	97.3	3.6e-59	NA	NA	NA	NA	NA	NA	NA	NA	NA
TRINITY_DN17801_c0_g2	vvi:100242000	86.4	1.9e-140	NA	NA	NA	NA	NA	NA	NA	NA	NA
TRINITY_DN17802_c0_g1	cam:105852085	62.3	3.5e-14	-	polyadenylate-binding protein RBP45-like	K03231	elongation factor 1-alpha	-	cam03013	RNA transport	Genetic Information Processing	Translation
TRINITY_DN17802_c1_g1	cam:105852306	73.4	1.7e-20	-	polyadenylate-binding protein RBP45A-like	K03231	elongation factor 1-alpha	-	cam03013	RNA transport	Genetic Information Processing	Translation
TRINITY_DN17802_c1_g3	cam:105852200	68	5.6e-22	-	polyadenylate-binding protein RBP45-like	K03231	elongation factor 1-alpha	-	cam03013	RNA transport	Genetic Information Processing	Translation
TRINITY_DN17802_c2_g2	vvi:100263684	64.5	1e-153	-	protein transport protein SEC31 homolog B	K14005	protein transport protein SEC31	-	vvi04141	Protein processing in endoplasmic reticulum	Genetic Information Processing	Folding, sorting and degradation
TRINITY_DN17803_c1_g3	aip:107645256	68.3	1.1e-28	-	bet1-like SNARE 1-1 isoform X1	K08504	blocked early in transport 1	-	aip04130	SNARE interactions in vesicular transport	Genetic Information Processing	Folding, sorting and degradation
TRINITY_DN17804_c0_g1	atr:18426597	61.7	3e-66	-	40S ribosomal protein S8	K02995	small subunit ribosomal protein S8e	-	atr03010	Ribosome	Genetic Information Processing	Translation
TRINITY_DN17805_c1_g1	csl:CospCoM_p26	64.5	2.7e-182	cox1	cytochrome c oxidase subunit 1	K02256	cytochrome c oxidase subunit 1	EC:1.9.3.1	csl00190	Oxidative phosphorylation	Metabolism	Energy metabolism
TRINITY_DN17805_c1_g2	ath:ArthMp109	64.4	1.5e-180	cox1	cytochrome c oxidase subunit 1	K02256	cytochrome c oxidase subunit 1	EC:1.9.3.1	ath00190	Oxidative phosphorylation	Metabolism	Energy metabolism
TRINITY_DN17805_c1_g3	egr:104426006	89	0	NA	NA	NA	NA	NA	NA	NA	NA	NA
TRINITY_DN17805_c1_g4	ath:ArthMp109	64.6	3.6e-182	cox1	cytochrome c oxidase subunit 1	K02256	cytochrome c oxidase subunit 1	EC:1.9.3.1	ath00190	Oxidative phosphorylation	Metabolism	Energy metabolism
TRINITY_DN17806_c0_g2	vvi:100264670	73.5	1.6e-234	NA	NA	NA	NA	NA	NA	NA	NA	NA
TRINITY_DN17806_c0_g3	tcc:18586320	78.7	0	-	regulator of nonsense transcripts UPF2	K14327	regulator of nonsense transcripts 2	-	tcc03013	RNA transport	Genetic Information Processing	Translation
TRINITY_DN17806_c0_g3	tcc:18586320	78.7	0	-	regulator of nonsense transcripts UPF2	K14327	regulator of nonsense transcripts 2	-	tcc03015	mRNA surveillance pathway	Genetic Information Processing	Translation
TRINITY_DN17806_c0_g7	boe:106307850	49.1	7.1e-11	-	phosphatase IMPL1	K01092	myo-inositol-1(or 4)-monophosphatase	EC:3.1.3.25	boe00562	Inositol phosphate metabolism	Metabolism	Carbohydrate metabolism
TRINITY_DN17806_c0_g7	boe:106307850	49.1	7.1e-11	-	phosphatase IMPL1	K01092	myo-inositol-1(or 4)-monophosphatase	EC:3.1.3.25	boe04070	Phosphatidylinositol signaling system	Environmental Information Processing	Signal transduction
TRINITY_DN17807_c1_g1	vvi:100262414	71.5	4.1e-95	-	eukaryotic translation initiation factor 4E-1	K03259	translation initiation factor 4E	-	vvi03013	RNA transport	Genetic Information Processing	Translation
TRINITY_DN17808_c0_g3	cmo:103487185	89.7	1.1e-103	-	dnaJ protein homolog	K09503	DnaJ homolog subfamily A member 2	-	cmo04141	Protein processing in endoplasmic reticulum	Genetic Information Processing	Folding, sorting and degradation
TRINITY_DN17809_c0_g2	nta:107775242	56.8	8.9e-27	NA	NA	NA	NA	NA	NA	NA	NA	NA
TRINITY_DN17810_c0_g1	vvi:100264866	99.1	6.3e-143	-	serine/threonine-protein phosphatase PP2A-2 catalytic subunit	K04382	serine/threonine-protein phosphatase 2A catalytic subunit	EC:3.1.3.16	vvi03015	mRNA surveillance pathway	Genetic Information Processing	Translation
TRINITY_DN17810_c0_g1	vvi:100264866	99.1	6.3e-143	-	serine/threonine-protein phosphatase PP2A-2 catalytic subunit	K04382	serine/threonine-protein phosphatase 2A catalytic subunit	EC:3.1.3.16	vvi04136	Autophagy - other eukaryotes	Cellular Processes	Transport and catabolism
TRINITY_DN17811_c0_g2	hbr:110638532	68.3	1.1e-06	NA	NA	NA	NA	NA	NA	NA	NA	NA
TRINITY_DN17813_c0_g2	vra:106763782	38	1.6e-88	NA	NA	NA	NA	NA	NA	NA	NA	NA
TRINITY_DN17813_c0_g6	ini:109184823	90.6	1.9e-39	-	phospho-2-dehydro-3-deoxyheptonate aldolase 1	K01626	3-deoxy-7-phosphoheptulonate synthase	EC:2.5.1.54	ini00400	Phenylalanine, tyrosine and tryptophan biosynthesis	Metabolism	Amino acid metabolism
TRINITY_DN17813_c0_g9	obr:102705710	35.5	1.6e-84	NA	NA	NA	NA	NA	NA	NA	NA	NA
TRINITY_DN17817_c0_g1	tcc:18587086	66.7	1.5e-133	NA	NA	NA	NA	NA	NA	NA	NA	NA
TRINITY_DN17818_c2_g1	hbr:110645814	82.1	1.6e-114	-	probable prolyl 4-hydroxylase 6	K00472	prolyl 4-hydroxylase	EC:1.14.11.2	hbr00330	Arginine and proline metabolism	Metabolism	Amino acid metabolism
TRINITY_DN17818_c2_g2	nta:107784900	96.6	6e-95	-	DNA-directed RNA polymerase II subunit RPB7	K03015	DNA-directed RNA polymerase II subunit RPB7	-	nta00230	Purine metabolism	Metabolism	Nucleotide metabolism
TRINITY_DN17818_c2_g2	nta:107784900	96.6	6e-95	-	DNA-directed RNA polymerase II subunit RPB7	K03015	DNA-directed RNA polymerase II subunit RPB7	-	nta00240	Pyrimidine metabolism	Metabolism	Nucleotide metabolism
TRINITY_DN17818_c2_g2	nta:107784900	96.6	6e-95	-	DNA-directed RNA polymerase II subunit RPB7	K03015	DNA-directed RNA polymerase II subunit RPB7	-	nta03020	RNA polymerase	Genetic Information Processing	Transcription
TRINITY_DN17818_c2_g3	sita:101785211	53.8	1.3e-10	-	uncharacterized protein LOC101785211	K16903	L-tryptophan---pyruvate aminotransferase	EC:2.6.1.99	sita00380	Tryptophan metabolism	Metabolism	Amino acid metabolism
TRINITY_DN17821_c0_g1	vvi:100248036	88.1	8e-110	-	eukaryotic translation initiation factor 3 subunit H	K03247	translation initiation factor 3 subunit H	-	vvi03013	RNA transport	Genetic Information Processing	Translation
TRINITY_DN17822_c0_g1	sind:105163387	69.3	3.2e-160	NA	NA	NA	NA	NA	NA	NA	NA	NA
TRINITY_DN17822_c0_g5	vvi:100267983	77	2.5e-304	-	beta-glucosidase BoGH3B	K05349	beta-glucosidase	EC:3.2.1.21	vvi00500	Starch and sucrose metabolism	Metabolism	Carbohydrate metabolism
TRINITY_DN17822_c0_g5	vvi:100267983	77	2.5e-304	-	beta-glucosidase BoGH3B	K05349	beta-glucosidase	EC:3.2.1.21	vvi00460	Cyanoamino acid metabolism	Metabolism	Metabolism of other amino acids
TRINITY_DN17822_c0_g5	vvi:100267983	77	2.5e-304	-	beta-glucosidase BoGH3B	K05349	beta-glucosidase	EC:3.2.1.21	vvi00940	Phenylpropanoid biosynthesis	Metabolism	Biosynthesis of other secondary metabolites
TRINITY_DN17827_c0_g1	zju:107412057	53.8	1.6e-11	NA	NA	NA	NA	NA	NA	NA	NA	NA
TRINITY_DN17828_c2_g3	aly:ARALYDRAFT_334448	60.7	1.3e-34	-	T23J18.22	K12669	oligosaccharyltransferase complex subunit gamma	-	aly00510	N-Glycan biosynthesis	Metabolism	Glycan biosynthesis and metabolism
TRINITY_DN17828_c2_g3	aly:ARALYDRAFT_334448	60.7	1.3e-34	-	T23J18.22	K12669	oligosaccharyltransferase complex subunit gamma	-	aly04141	Protein processing in endoplasmic reticulum	Genetic Information Processing	Folding, sorting and degradation
TRINITY_DN17829_c1_g2	osa:4337456	100	7.1e-27	NA	NA	NA	NA	NA	NA	NA	NA	NA
TRINITY_DN17830_c2_g1	mdm:103421028	54.4	8.3e-13	NA	NA	NA	NA	NA	NA	NA	NA	NA
TRINITY_DN17833_c0_g1	pxb:103929747	68.2	2e-29	NA	NA	NA	NA	NA	NA	NA	NA	NA
TRINITY_DN17833_c0_g2	pxb:103929695	65.7	6.5e-38	NA	NA	NA	NA	NA	NA	NA	NA	NA
TRINITY_DN17834_c0_g5	bpg:BathyMg00020	52.5	3.8e-75	nad1	NADH dehydrogenase subunit 1	K03878	NADH-ubiquinone oxidoreductase chain 1	EC:1.6.5.3	bpg00190	Oxidative phosphorylation	Metabolism	Energy metabolism
TRINITY_DN17836_c0_g4	var:108343862	72.3	2.8e-236	NA	NA	NA	NA	NA	NA	NA	NA	NA
TRINITY_DN17836_c0_g5	ccp:CHC_T00000146001	50	1.1e-07	-	hypothetical protein	K04393	cell division control protein 42	-	ccp04144	Endocytosis	Cellular Processes	Transport and catabolism
TRINITY_DN17836_c0_g5	ccp:CHC_T00000146001	50	1.1e-07	-	hypothetical protein	K04393	cell division control protein 42	-	ccp04933	AGE-RAGE signaling pathway in diabetic complications	Human Diseases	Endocrine and metabolic diseases
TRINITY_DN17838_c1_g4	csl:COCSUDRAFT_47382	33.5	4.4e-22	NA	NA	NA	NA	NA	NA	NA	NA	NA
TRINITY_DN17838_c2_g1	nta:107831376	58.3	1.3e-181	-	N-lysine methyltransferase SETD6-like	K19199	histone-lysine N-methyltransferase SETD3	EC:2.1.1.43	nta00310	Lysine degradation	Metabolism	Amino acid metabolism
TRINITY_DN17839_c4_g1	nta:107763355	91	3.4e-164	-	phosphoenolpyruvate carboxylase-like	K01595	phosphoenolpyruvate carboxylase	EC:4.1.1.31	nta00620	Pyruvate metabolism	Metabolism	Carbohydrate metabolism
TRINITY_DN17839_c4_g1	nta:107763355	91	3.4e-164	-	phosphoenolpyruvate carboxylase-like	K01595	phosphoenolpyruvate carboxylase	EC:4.1.1.31	nta00710	Carbon fixation in photosynthetic organisms	Metabolism	Energy metabolism
TRINITY_DN17839_c4_g2	vvi:100267525	87.2	1.7e-120	-	phosphoenolpyruvate carboxylase	K01595	phosphoenolpyruvate carboxylase	EC:4.1.1.31	vvi00620	Pyruvate metabolism	Metabolism	Carbohydrate metabolism
TRINITY_DN17839_c4_g2	vvi:100267525	87.2	1.7e-120	-	phosphoenolpyruvate carboxylase	K01595	phosphoenolpyruvate carboxylase	EC:4.1.1.31	vvi00710	Carbon fixation in photosynthetic organisms	Metabolism	Energy metabolism
TRINITY_DN17839_c4_g3	gmx:547456	100	1.5e-32	GmPEPC7	phosphoenolpyruvate carboxylase	K01595	phosphoenolpyruvate carboxylase	EC:4.1.1.31	gmx00620	Pyruvate metabolism	Metabolism	Carbohydrate metabolism
TRINITY_DN17839_c4_g3	gmx:547456	100	1.5e-32	GmPEPC7	phosphoenolpyruvate carboxylase	K01595	phosphoenolpyruvate carboxylase	EC:4.1.1.31	gmx00710	Carbon fixation in photosynthetic organisms	Metabolism	Energy metabolism
TRINITY_DN17840_c0_g1	ccaj:109816326	50	1.1e-48	NA	NA	NA	NA	NA	NA	NA	NA	NA
TRINITY_DN17841_c1_g1	tcc:18596390	34.6	1.8e-55	NA	NA	NA	NA	NA	NA	NA	NA	NA
TRINITY_DN17845_c1_g1	mpp:MICPUCDRAFT_3523	51.4	8e-67	NA	NA	NA	NA	NA	NA	NA	NA	NA
TRINITY_DN17845_c1_g2	bvg:104887757	48.7	3.7e-06	NA	NA	NA	NA	NA	NA	NA	NA	NA
TRINITY_DN17845_c2_g3	han:110886890	84	3.3e-74	NA	NA	NA	NA	NA	NA	NA	NA	NA
TRINITY_DN17847_c0_g1	han:110929839	68.9	9.9e-64	NA	NA	NA	NA	NA	NA	NA	NA	NA
TRINITY_DN17848_c0_g1	egr:104441441	35.8	2.5e-24	NA	NA	NA	NA	NA	NA	NA	NA	NA
TRINITY_DN17849_c0_g2	vvi:100255348	76.8	3.9e-111	-	uncharacterized LOC100255348	K02897	large subunit ribosomal protein L25	-	vvi03010	Ribosome	Genetic Information Processing	Translation
TRINITY_DN17850_c0_g1	nta:107814122	57.2	9.4e-102	-	protein HOTHEAD-like	K15403	fatty acid omega-hydroxy dehydrogenase	EC:1.1.-.-	nta00073	Cutin, suberine and wax biosynthesis	Metabolism	Lipid metabolism
TRINITY_DN17850_c0_g2	sot:102591179	33.3	3.7e-07	-	putative ABC transporter C family member 15	K05665	ATP-binding cassette, subfamily C (CFTR/MRP), member 1	-	sot02010	ABC transporters	Environmental Information Processing	Membrane transport
TRINITY_DN17850_c0_g3	sind:105157752	55.8	1.6e-81	-	protein HOTHEAD isoform X1	K15403	fatty acid omega-hydroxy dehydrogenase	EC:1.1.-.-	sind00073	Cutin, suberine and wax biosynthesis	Metabolism	Lipid metabolism
TRINITY_DN17852_c1_g1	fve:101293827	42.1	4.4e-13	-	40S ribosomal protein S20-2	K02969	small subunit ribosomal protein S20e	-	fve03010	Ribosome	Genetic Information Processing	Translation
TRINITY_DN17853_c0_g1	cic:CICLE_v10026416mg	85.8	1.5e-115	NA	NA	NA	NA	NA	NA	NA	NA	NA
TRINITY_DN17854_c0_g1	nnu:104597561	50.7	5e-46	NA	NA	NA	NA	NA	NA	NA	NA	NA
TRINITY_DN17855_c1_g1	egr:104447982	70.3	6e-130	NA	NA	NA	NA	NA	NA	NA	NA	NA
TRINITY_DN17856_c1_g1	pavi:110766683	72.8	4.5e-73	NA	NA	NA	NA	NA	NA	NA	NA	NA
TRINITY_DN17857_c1_g2	ghi:107887550	49.7	3.4e-83	NA	NA	NA	NA	NA	NA	NA	NA	NA
TRINITY_DN17857_c1_g3	cpap:110816298	95	3.3e-78	NA	NA	NA	NA	NA	NA	NA	NA	NA
TRINITY_DN17859_c0_g1	tcc:18613267	77.3	1.5e-250	NA	NA	NA	NA	NA	NA	NA	NA	NA
TRINITY_DN17859_c0_g2	tcc:18613267	65.4	1e-173	NA	NA	NA	NA	NA	NA	NA	NA	NA
TRINITY_DN17860_c0_g3	han:110879007	88.3	5.6e-75	-	N-carbamoylputrescine amidase	K12251	N-carbamoylputrescine amidase	EC:3.5.1.53	han00330	Arginine and proline metabolism	Metabolism	Amino acid metabolism
TRINITY_DN17861_c0_g1	ccp:CHC_T00008514001	36.1	2.8e-17	NA	NA	NA	NA	NA	NA	NA	NA	NA
TRINITY_DN17863_c0_g1	smo:SELMODRAFT_429199	36.8	1.3e-49	-	hypothetical protein	K12818	ATP-dependent RNA helicase DHX8/PRP22	EC:3.6.4.13	smo03040	Spliceosome	Genetic Information Processing	Transcription
TRINITY_DN17864_c0_g1	sly:101259693	84.5	5.5e-122	-	pyridoxal kinase	K00868	pyridoxine kinase	EC:2.7.1.35	sly00750	Vitamin B6 metabolism	Metabolism	Metabolism of cofactors and vitamins
TRINITY_DN17865_c0_g1	zju:107420919	71.3	6e-38	-	glutamyl-tRNA(Gln) amidotransferase subunit C	K02435	aspartyl-tRNA(Asn)/glutamyl-tRNA(Gln) amidotransferase subunit C	EC:6.3.5.6 6.3.5.7	zju00970	Aminoacyl-tRNA biosynthesis	Genetic Information Processing	Translation
TRINITY_DN17866_c0_g1	fve:101296690	55.3	1.5e-29	-	beta-glucosidase 24-like	K01188	beta-glucosidase	EC:3.2.1.21	fve00500	Starch and sucrose metabolism	Metabolism	Carbohydrate metabolism
TRINITY_DN17866_c0_g1	fve:101296690	55.3	1.5e-29	-	beta-glucosidase 24-like	K01188	beta-glucosidase	EC:3.2.1.21	fve00460	Cyanoamino acid metabolism	Metabolism	Metabolism of other amino acids
TRINITY_DN17866_c0_g1	fve:101296690	55.3	1.5e-29	-	beta-glucosidase 24-like	K01188	beta-glucosidase	EC:3.2.1.21	fve00940	Phenylpropanoid biosynthesis	Metabolism	Biosynthesis of other secondary metabolites
TRINITY_DN17867_c0_g1	pxb:103938251	87.6	7e-237	-	LL-diaminopimelate aminotransferase	K10206	LL-diaminopimelate aminotransferase	EC:2.6.1.83	pxb00300	Lysine biosynthesis	Metabolism	Amino acid metabolism
TRINITY_DN17869_c0_g3	vra:106774260	68.8	2.5e-10	-	chlorophyll a-b binding protein CP29.1	K08915	light-harvesting complex II chlorophyll a/b binding protein 4	-	vra00196	Photosynthesis - antenna proteins	Metabolism	Energy metabolism
TRINITY_DN17870_c0_g1	zju:107424604	79	5.8e-51	-	DNA replication licensing factor MCM2-like	K02540	DNA replication licensing factor MCM2	EC:3.6.4.12	zju03030	DNA replication	Genetic Information Processing	Replication and repair
TRINITY_DN17872_c0_g1	obr:102706581	60.8	3.8e-11	NA	NA	NA	NA	NA	NA	NA	NA	NA
TRINITY_DN17873_c2_g3	nta:107788525	66.6	1.5e-176	NA	NA	NA	NA	NA	NA	NA	NA	NA
TRINITY_DN17873_c2_g7	sind:105167547	52	4.1e-65	-	eukaryotic translation initiation factor 4G-like	K03260	translation initiation factor 4G	-	sind03013	RNA transport	Genetic Information Processing	Translation
TRINITY_DN17875_c0_g2	tcc:18608157	56.1	4e-76	-	dehydrodolichyl diphosphate synthase complex subunit NUS1	K11778	ditrans,polycis-polyprenyl diphosphate synthase	EC:2.5.1.87	tcc00900	Terpenoid backbone biosynthesis	Metabolism	Metabolism of terpenoids and polyketides
TRINITY_DN17877_c0_g1	tcc:18587731	100	7.6e-23	-	60S ribosomal protein L39	K02924	large subunit ribosomal protein L39e	-	tcc03010	Ribosome	Genetic Information Processing	Translation
TRINITY_DN17877_c0_g4	ini:109156186	65.7	5.6e-126	-	SEC12-like protein 2	K14003	prolactin regulatory element-binding protein	-	ini04141	Protein processing in endoplasmic reticulum	Genetic Information Processing	Folding, sorting and degradation
TRINITY_DN17879_c0_g1	zju:107430772	44.9	2e-162	NA	NA	NA	NA	NA	NA	NA	NA	NA
TRINITY_DN17879_c0_g7	hbr:110633871	50	1.3e-11	NA	NA	NA	NA	NA	NA	NA	NA	NA
TRINITY_DN17880_c0_g1	zju:107430222	77.7	1.5e-124	-	ubiquinone biosynthesis monooxygenase COQ6	K06126	ubiquinone biosynthesis monooxygenase Coq6	EC:1.14.13.-	zju00130	Ubiquinone and other terpenoid-quinone biosynthesis	Metabolism	Metabolism of cofactors and vitamins
TRINITY_DN17882_c0_g7	zju:107424726	80.4	5e-108	-	succinate-semialdehyde dehydrogenase	K17761	succinate-semialdehyde dehydrogenase, mitochondrial	EC:1.2.1.24	zju00650	Butanoate metabolism	Metabolism	Carbohydrate metabolism
TRINITY_DN17882_c0_g7	zju:107424726	80.4	5e-108	-	succinate-semialdehyde dehydrogenase	K17761	succinate-semialdehyde dehydrogenase, mitochondrial	EC:1.2.1.24	zju00250	Alanine, aspartate and glutamate metabolism	Metabolism	Amino acid metabolism
TRINITY_DN17883_c0_g1	han:110886145	79.8	5e-82	-	ribulose bisphosphate carboxylase small chain clone 512-like	K01602	ribulose-bisphosphate carboxylase small chain	EC:4.1.1.39	han00630	Glyoxylate and dicarboxylate metabolism	Metabolism	Carbohydrate metabolism
TRINITY_DN17883_c0_g1	han:110886145	79.8	5e-82	-	ribulose bisphosphate carboxylase small chain clone 512-like	K01602	ribulose-bisphosphate carboxylase small chain	EC:4.1.1.39	han00710	Carbon fixation in photosynthetic organisms	Metabolism	Energy metabolism
TRINITY_DN17887_c0_g1	csat:104701624	100	5e-36	-	ubiquitin-conjugating enzyme E2 2-like	K10573	ubiquitin-conjugating enzyme E2 A	EC:2.3.2.23	csat04120	Ubiquitin mediated proteolysis	Genetic Information Processing	Folding, sorting and degradation
TRINITY_DN17887_c2_g3	egr:104419225	83	4.2e-16	-	ubiquitin-conjugating enzyme E2 2	K10573	ubiquitin-conjugating enzyme E2 A	EC:2.3.2.23	egr04120	Ubiquitin mediated proteolysis	Genetic Information Processing	Folding, sorting and degradation
TRINITY_DN17892_c0_g1	sly:101248849	50.9	1.1e-88	NA	NA	NA	NA	NA	NA	NA	NA	NA
TRINITY_DN17893_c1_g1	boe:106315405	37	2.1e-06	-	protein QUIRKY-like	K00549	5-methyltetrahydropteroyltriglutamate--homocysteine methyltransferase	EC:2.1.1.14	boe00270	Cysteine and methionine metabolism	Metabolism	Amino acid metabolism
TRINITY_DN17893_c1_g1	boe:106315405	37	2.1e-06	-	protein QUIRKY-like	K00549	5-methyltetrahydropteroyltriglutamate--homocysteine methyltransferase	EC:2.1.1.14	boe00450	Selenocompound metabolism	Metabolism	Metabolism of other amino acids
TRINITY_DN17893_c1_g2	tcc:18588523	82.4	1.7e-41	-	protein phosphatase 2C 56	K14497	protein phosphatase 2C	EC:3.1.3.16	tcc04016	MAPK signaling pathway - plant	Environmental Information Processing	Signal transduction
TRINITY_DN17893_c1_g2	tcc:18588523	82.4	1.7e-41	-	protein phosphatase 2C 56	K14497	protein phosphatase 2C	EC:3.1.3.16	tcc04075	Plant hormone signal transduction	Environmental Information Processing	Signal transduction
TRINITY_DN17893_c1_g4	aly:ARALYDRAFT_328625	47.3	1.1e-68	-	hypothetical protein	K02888	large subunit ribosomal protein L21	-	aly03010	Ribosome	Genetic Information Processing	Translation
TRINITY_DN17894_c0_g1	sind:105173227	94.2	2e-118	-	proteasome subunit beta type-1	K02732	20S proteasome subunit beta 6	EC:3.4.25.1	sind03050	Proteasome	Genetic Information Processing	Folding, sorting and degradation
TRINITY_DN17896_c0_g1	tcc:18591481	62.8	2.6e-69	NA	NA	NA	NA	NA	NA	NA	NA	NA
TRINITY_DN17898_c1_g1	nta:107770679	95.2	7.4e-85	-	ras-related protein RABF2a-like	K07887	Ras-related protein Rab-5A	-	nta04144	Endocytosis	Cellular Processes	Transport and catabolism
TRINITY_DN17898_c1_g1	nta:107770679	95.2	7.4e-85	-	ras-related protein RABF2a-like	K07887	Ras-related protein Rab-5A	-	nta04145	Phagosome	Cellular Processes	Transport and catabolism
TRINITY_DN17900_c0_g3	pda:103709229	54.3	1.1e-75	NA	NA	NA	NA	NA	NA	NA	NA	NA
TRINITY_DN17900_c0_g4	nto:104086367	92	5.7e-193	-	GDP-mannose 4	K01711	GDPmannose 4,6-dehydratase	EC:4.2.1.47	nto00051	Fructose and mannose metabolism	Metabolism	Carbohydrate metabolism
TRINITY_DN17900_c0_g4	nto:104086367	92	5.7e-193	-	GDP-mannose 4	K01711	GDPmannose 4,6-dehydratase	EC:4.2.1.47	nto00520	Amino sugar and nucleotide sugar metabolism	Metabolism	Carbohydrate metabolism
TRINITY_DN17900_c0_g5	fve:101303359	88	2.2e-53	-	GDP-mannose 4	K01711	GDPmannose 4,6-dehydratase	EC:4.2.1.47	fve00051	Fructose and mannose metabolism	Metabolism	Carbohydrate metabolism
TRINITY_DN17900_c0_g5	fve:101303359	88	2.2e-53	-	GDP-mannose 4	K01711	GDPmannose 4,6-dehydratase	EC:4.2.1.47	fve00520	Amino sugar and nucleotide sugar metabolism	Metabolism	Carbohydrate metabolism
TRINITY_DN17901_c0_g1	thj:104823720	85.7	1.3e-123	-	proteasome subunit beta type-4	K02736	20S proteasome subunit beta 7	EC:3.4.25.1	thj03050	Proteasome	Genetic Information Processing	Folding, sorting and degradation
TRINITY_DN17903_c0_g1	gmx:100803637	78.7	7e-115	-	peroxidase P7-like	K00430	peroxidase	EC:1.11.1.7	gmx00940	Phenylpropanoid biosynthesis	Metabolism	Biosynthesis of other secondary metabolites
TRINITY_DN17904_c0_g4	osa:4344621	100	1.7e-47	NA	NA	NA	NA	NA	NA	NA	NA	NA
TRINITY_DN17906_c0_g2	sind:105170420	69.7	8.7e-54	NA	NA	NA	NA	NA	NA	NA	NA	NA
TRINITY_DN17907_c0_g9	nta:107820535	58.5	1.4e-11	-	SH3 domain-containing protein 2-like	K11247	endophilin-A	-	nta04144	Endocytosis	Cellular Processes	Transport and catabolism
TRINITY_DN17908_c0_g1	pmum:103336483	69.4	3.4e-33	-	molybdopterin synthase sulfur carrier subunit	K21232	molybdopterin synthase sulfur carrier subunit	-	pmum04122	Sulfur relay system	Genetic Information Processing	Folding, sorting and degradation
TRINITY_DN17909_c1_g6	cit:102577973	82.7	3e-100	-	pyruvate decarboxylase	K01568	pyruvate decarboxylase	EC:4.1.1.1	cit00010	Glycolysis / Gluconeogenesis	Metabolism	Carbohydrate metabolism
TRINITY_DN17912_c0_g1	gmx:100794515	100	1.1e-39	NA	NA	NA	NA	NA	NA	NA	NA	NA
TRINITY_DN17912_c0_g2	han:110942290	90.5	2.6e-161	NA	NA	NA	NA	NA	NA	NA	NA	NA
TRINITY_DN17912_c0_g3	jcu:105635136	93.4	3.9e-37	NA	NA	NA	NA	NA	NA	NA	NA	NA
TRINITY_DN17912_c0_g6	osa:4342850	100	7.1e-51	NA	NA	NA	NA	NA	NA	NA	NA	NA
TRINITY_DN17912_c0_g7	jcu:105628703	94.4	3.1e-130	NA	NA	NA	NA	NA	NA	NA	NA	NA
TRINITY_DN17912_c0_g8	han:110883847	87.9	1.7e-79	NA	NA	NA	NA	NA	NA	NA	NA	NA
TRINITY_DN17913_c0_g1	gmx:100814379	100	2.3e-41	-	probable 26S proteasome non-ATPase regulatory subunit 3	K03033	26S proteasome regulatory subunit N3	-	gmx03050	Proteasome	Genetic Information Processing	Folding, sorting and degradation
TRINITY_DN17913_c0_g2	cpap:110818950	90.3	2.1e-237	-	probable 26S proteasome non-ATPase regulatory subunit 3	K03033	26S proteasome regulatory subunit N3	-	cpap03050	Proteasome	Genetic Information Processing	Folding, sorting and degradation
TRINITY_DN17914_c0_g1	smo:SELMODRAFT_231326	35.4	1e-43	NA	NA	NA	NA	NA	NA	NA	NA	NA
TRINITY_DN17918_c1_g1	aip:110266878	71.4	6.2e-07	-	uncharacterized protein LOC110266878	K02108	F-type H+-transporting ATPase subunit a	-	aip00190	Oxidative phosphorylation	Metabolism	Energy metabolism
TRINITY_DN17918_c1_g1	aip:110266878	71.4	6.2e-07	-	uncharacterized protein LOC110266878	K02108	F-type H+-transporting ATPase subunit a	-	aip00195	Photosynthesis	Metabolism	Energy metabolism
TRINITY_DN17919_c2_g1	vvi:100266806	64.1	3.3e-37	NA	NA	NA	NA	NA	NA	NA	NA	NA
TRINITY_DN17919_c2_g3	jcu:105644577	75.4	1e-149	-	pre-mRNA-processing factor 17 isoform X1	K12816	pre-mRNA-processing factor 17	-	jcu03040	Spliceosome	Genetic Information Processing	Transcription
TRINITY_DN17919_c2_g4	cit:102611505	98.6	1.4e-131	-	pre-mRNA-processing factor 17 isoform X1	K12816	pre-mRNA-processing factor 17	-	cit03040	Spliceosome	Genetic Information Processing	Transcription
TRINITY_DN17920_c0_g3	gmx:100819146	100	3.5e-117	NA	NA	NA	NA	NA	NA	NA	NA	NA
TRINITY_DN17922_c1_g4	sind:105156122	89.8	2.6e-199	-	biotin carboxylase 2	K01961	acetyl-CoA carboxylase, biotin carboxylase subunit	EC:6.4.1.2 6.3.4.14	sind00620	Pyruvate metabolism	Metabolism	Carbohydrate metabolism
TRINITY_DN17922_c1_g4	sind:105156122	89.8	2.6e-199	-	biotin carboxylase 2	K01961	acetyl-CoA carboxylase, biotin carboxylase subunit	EC:6.4.1.2 6.3.4.14	sind00640	Propanoate metabolism	Metabolism	Carbohydrate metabolism
TRINITY_DN17922_c1_g4	sind:105156122	89.8	2.6e-199	-	biotin carboxylase 2	K01961	acetyl-CoA carboxylase, biotin carboxylase subunit	EC:6.4.1.2 6.3.4.14	sind00061	Fatty acid biosynthesis	Metabolism	Lipid metabolism
TRINITY_DN17924_c0_g1	egr:104443644	70.4	3.2e-21	NA	NA	NA	NA	NA	NA	NA	NA	NA
TRINITY_DN17924_c1_g1	gmx:100806698	98.8	5.8e-39	NA	NA	NA	NA	NA	NA	NA	NA	NA
TRINITY_DN17924_c1_g2	osa:4352014	100	2.5e-100	-	ribulose bisphosphate carboxylase small chain A	K01602	ribulose-bisphosphate carboxylase small chain	EC:4.1.1.39	osa00630	Glyoxylate and dicarboxylate metabolism	Metabolism	Carbohydrate metabolism
TRINITY_DN17924_c1_g2	osa:4352014	100	2.5e-100	-	ribulose bisphosphate carboxylase small chain A	K01602	ribulose-bisphosphate carboxylase small chain	EC:4.1.1.39	osa00710	Carbon fixation in photosynthetic organisms	Metabolism	Energy metabolism
TRINITY_DN17924_c1_g3	gmx:100794076	100	5.7e-33	NA	NA	NA	NA	NA	NA	NA	NA	NA
TRINITY_DN17925_c1_g1	sind:105170976	79.4	9.9e-168	NA	NA	NA	NA	NA	NA	NA	NA	NA
TRINITY_DN17925_c1_g2	sind:105170976	81.4	5e-174	NA	NA	NA	NA	NA	NA	NA	NA	NA
TRINITY_DN17928_c0_g1	csv:101216276	95.5	1e-10	-	hypothetical protein	K12866	WW domain-binding protein 11	-	csv03040	Spliceosome	Genetic Information Processing	Transcription
TRINITY_DN17934_c0_g1	egu:105053671	52.6	2.8e-38	-	60S ribosomal protein L21-1	K02889	large subunit ribosomal protein L21e	-	egu03010	Ribosome	Genetic Information Processing	Translation
TRINITY_DN17934_c0_g10	bpg:BathyMg00110	68.3	6.4e-68	cox1	cytochrome c oxidase subunit 1	K02256	cytochrome c oxidase subunit 1	EC:1.9.3.1	bpg00190	Oxidative phosphorylation	Metabolism	Energy metabolism
TRINITY_DN17934_c0_g2	bvg:809579	66.6	3.2e-183	cox1	cytochrome c oxidase subunit 1	K02256	cytochrome c oxidase subunit 1	EC:1.9.3.1	bvg00190	Oxidative phosphorylation	Metabolism	Energy metabolism
TRINITY_DN17934_c0_g6	ccp:ChcroMp03	63	2.8e-20	cox1	cytochrome c oxidase subunit 1	K02256	cytochrome c oxidase subunit 1	EC:1.9.3.1	ccp00190	Oxidative phosphorylation	Metabolism	Energy metabolism
TRINITY_DN17934_c0_g7	eus:EUTSA_v10026073mg	71.7	7.9e-63	-	hypothetical protein	K02991	small subunit ribosomal protein S6e	-	eus03010	Ribosome	Genetic Information Processing	Translation
TRINITY_DN17934_c0_g8	gsl:Gasu_34220	72.4	9.6e-64	-	40S ribosomal protein S6e	K02991	small subunit ribosomal protein S6e	-	gsl03010	Ribosome	Genetic Information Processing	Translation
TRINITY_DN17935_c0_g1	hbr:110641209	72.8	9.2e-227	-	NAD(H) kinase 1-like isoform X1	K00858	NAD+ kinase	EC:2.7.1.23	hbr00760	Nicotinate and nicotinamide metabolism	Metabolism	Metabolism of cofactors and vitamins
TRINITY_DN17940_c0_g4	smo:SELMODRAFT_83729	25.3	1.2e-20	-	hypothetical protein	K01569	oxalate decarboxylase	EC:4.1.1.2	smo00630	Glyoxylate and dicarboxylate metabolism	Metabolism	Carbohydrate metabolism
TRINITY_DN17940_c0_g6	spen:107007530	72.6	4.1e-24	-	thiamine biosynthetic bifunctional enzyme TH1	K14153	hydroxymethylpyrimidine kinase / phosphomethylpyrimidine kinase / thiamine-phosphate diphosphorylase	EC:2.7.1.49 2.7.4.7 2.5.1.3	spen00730	Thiamine metabolism	Metabolism	Metabolism of cofactors and vitamins
TRINITY_DN17940_c0_g7	pda:103700236	97.4	1.2e-14	-	actin	K05692	actin beta/gamma 1	-	pda04145	Phagosome	Cellular Processes	Transport and catabolism
TRINITY_DN17941_c0_g1	hbr:110639020	48.5	4.8e-34	NA	NA	NA	NA	NA	NA	NA	NA	NA
TRINITY_DN17943_c0_g1	han:110872124	60	9.2e-49	NA	NA	NA	NA	NA	NA	NA	NA	NA
TRINITY_DN17943_c0_g2	vvi:100256070	59.1	0	-	uncharacterized protein At3g06530	K14550	U3 small nucleolar RNA-associated protein 10	-	vvi03008	Ribosome biogenesis in eukaryotes	Genetic Information Processing	Translation
TRINITY_DN17943_c0_g4	rcu:8264794	84.3	5.8e-88	-	CDP-diacylglycerol--glycerol-3-phosphate 3-phosphatidyltransferase 2	K00995	CDP-diacylglycerol---glycerol-3-phosphate 3-phosphatidyltransferase	EC:2.7.8.5	rcu00564	Glycerophospholipid metabolism	Metabolism	Lipid metabolism
TRINITY_DN17948_c1_g3	zju:107411503	84.9	6.9e-307	-	ubiquitin-activating enzyme E1 1	K03178	ubiquitin-activating enzyme E1	EC:6.2.1.45	zju04120	Ubiquitin mediated proteolysis	Genetic Information Processing	Folding, sorting and degradation
TRINITY_DN17953_c1_g1	hbr:110665547	79.3	1.4e-46	-	U1 small nuclear ribonucleoprotein C-like	K11095	U1 small nuclear ribonucleoprotein C	-	hbr03040	Spliceosome	Genetic Information Processing	Transcription
TRINITY_DN17953_c1_g2	vvi:100266188	64.6	1.5e-57	NA	NA	NA	NA	NA	NA	NA	NA	NA
TRINITY_DN17953_c1_g3	sind:105166348	68.3	3.8e-33	NA	NA	NA	NA	NA	NA	NA	NA	NA
TRINITY_DN17953_c1_g4	vvi:100853254	45.6	1e-56	NA	NA	NA	NA	NA	NA	NA	NA	NA
TRINITY_DN17954_c1_g1	csat:104749767	43.4	8.6e-91	-	phospholipase A1-IIbeta-like	K00145	N-acetyl-gamma-glutamyl-phosphate reductase	EC:1.2.1.38	csat00220	Arginine biosynthesis	Metabolism	Amino acid metabolism
TRINITY_DN17954_c1_g3	vvi:100263543	82.1	1.2e-37	NA	NA	NA	NA	NA	NA	NA	NA	NA
TRINITY_DN17954_c1_g4	sly:543812	83.6	1.7e-21	-	phosphoenolpyruvate carboxykinase	K01610	phosphoenolpyruvate carboxykinase (ATP)	EC:4.1.1.49	sly00010	Glycolysis / Gluconeogenesis	Metabolism	Carbohydrate metabolism
TRINITY_DN17954_c1_g4	sly:543812	83.6	1.7e-21	-	phosphoenolpyruvate carboxykinase	K01610	phosphoenolpyruvate carboxykinase (ATP)	EC:4.1.1.49	sly00020	Citrate cycle (TCA cycle)	Metabolism	Carbohydrate metabolism
TRINITY_DN17954_c1_g4	sly:543812	83.6	1.7e-21	-	phosphoenolpyruvate carboxykinase	K01610	phosphoenolpyruvate carboxykinase (ATP)	EC:4.1.1.49	sly00620	Pyruvate metabolism	Metabolism	Carbohydrate metabolism
TRINITY_DN17954_c1_g4	sly:543812	83.6	1.7e-21	-	phosphoenolpyruvate carboxykinase	K01610	phosphoenolpyruvate carboxykinase (ATP)	EC:4.1.1.49	sly00710	Carbon fixation in photosynthetic organisms	Metabolism	Energy metabolism
TRINITY_DN17956_c0_g2	cpap:110817676	35.9	9e-26	-	gibberellin receptor GID1B-like	K14493	gibberellin receptor GID1	EC:3.-.-.-	cpap04075	Plant hormone signal transduction	Environmental Information Processing	Signal transduction
TRINITY_DN17956_c0_g3	csv:101213253	35.1	1.6e-10	GID1a	gibberellin receptor GID1C-like	K14493	gibberellin receptor GID1	EC:3.-.-.-	csv04075	Plant hormone signal transduction	Environmental Information Processing	Signal transduction
TRINITY_DN17960_c0_g1	han:110916515	93.6	2.1e-51	-	60S ribosomal protein L36-2-like	K02920	large subunit ribosomal protein L36e	-	han03010	Ribosome	Genetic Information Processing	Translation
TRINITY_DN17960_c0_g3	gmx:100785591	100	5.6e-54	-	60S ribosomal protein L36-3-like	K02920	large subunit ribosomal protein L36e	-	gmx03010	Ribosome	Genetic Information Processing	Translation
TRINITY_DN17960_c0_g4	han:110916515	94.2	5.3e-40	-	60S ribosomal protein L36-2-like	K02920	large subunit ribosomal protein L36e	-	han03010	Ribosome	Genetic Information Processing	Translation
TRINITY_DN17962_c0_g1	cpap:110811677	59.6	4.4e-79	-	delta(12)-fatty-acid desaturase FAD2	K10256	omega-6 fatty acid desaturase / acyl-lipid omega-6 desaturase (Delta-12 desaturase)	EC:1.14.19.6 1.14.19.22	cpap01040	Biosynthesis of unsaturated fatty acids	Metabolism	Lipid metabolism
TRINITY_DN17962_c0_g2	bvg:104889198	72.7	5.2e-33	-	delta(12)-fatty-acid desaturase FAD2	K10256	omega-6 fatty acid desaturase / acyl-lipid omega-6 desaturase (Delta-12 desaturase)	EC:1.14.19.6 1.14.19.22	bvg01040	Biosynthesis of unsaturated fatty acids	Metabolism	Lipid metabolism
TRINITY_DN17963_c0_g3	nta:107822220	56.5	1.6e-91	-	pectinesterase/pectinesterase inhibitor PPE8B-like	K01051	pectinesterase	EC:3.1.1.11	nta00040	Pentose and glucuronate interconversions	Metabolism	Carbohydrate metabolism
TRINITY_DN17965_c0_g2	sind:105161991	74.1	4.2e-67	-	26S proteasome regulatory subunit RPN13	K06691	26S proteasome regulatory subunit N13	-	sind03050	Proteasome	Genetic Information Processing	Folding, sorting and degradation
TRINITY_DN17967_c0_g1	var:108333295	93.5	1e-57	-	RING-box protein 1a	K03868	RING-box protein 1	EC:2.3.2.32	var04141	Protein processing in endoplasmic reticulum	Genetic Information Processing	Folding, sorting and degradation
TRINITY_DN17967_c0_g1	var:108333295	93.5	1e-57	-	RING-box protein 1a	K03868	RING-box protein 1	EC:2.3.2.32	var04120	Ubiquitin mediated proteolysis	Genetic Information Processing	Folding, sorting and degradation
TRINITY_DN17967_c0_g1	var:108333295	93.5	1e-57	-	RING-box protein 1a	K03868	RING-box protein 1	EC:2.3.2.32	var03420	Nucleotide excision repair	Genetic Information Processing	Replication and repair
TRINITY_DN17967_c0_g5	han:110893699	90.2	3.5e-56	-	RING-box protein 1a-like	K03868	RING-box protein 1	EC:2.3.2.32	han04141	Protein processing in endoplasmic reticulum	Genetic Information Processing	Folding, sorting and degradation
TRINITY_DN17967_c0_g5	han:110893699	90.2	3.5e-56	-	RING-box protein 1a-like	K03868	RING-box protein 1	EC:2.3.2.32	han04120	Ubiquitin mediated proteolysis	Genetic Information Processing	Folding, sorting and degradation
TRINITY_DN17967_c0_g5	han:110893699	90.2	3.5e-56	-	RING-box protein 1a-like	K03868	RING-box protein 1	EC:2.3.2.32	han03420	Nucleotide excision repair	Genetic Information Processing	Replication and repair
TRINITY_DN17967_c0_g8	hbr:110650380	52.2	1.2e-95	NA	NA	NA	NA	NA	NA	NA	NA	NA
TRINITY_DN17967_c0_g9	sind:105173683	88.6	8.1e-63	-	RING-box protein 1a	K03868	RING-box protein 1	EC:2.3.2.32	sind04141	Protein processing in endoplasmic reticulum	Genetic Information Processing	Folding, sorting and degradation
TRINITY_DN17967_c0_g9	sind:105173683	88.6	8.1e-63	-	RING-box protein 1a	K03868	RING-box protein 1	EC:2.3.2.32	sind04120	Ubiquitin mediated proteolysis	Genetic Information Processing	Folding, sorting and degradation
TRINITY_DN17967_c0_g9	sind:105173683	88.6	8.1e-63	-	RING-box protein 1a	K03868	RING-box protein 1	EC:2.3.2.32	sind03420	Nucleotide excision repair	Genetic Information Processing	Replication and repair
TRINITY_DN17972_c3_g1	lja:Lj3g3v0525170.1	67.1	1.1e-20	Lj3g3v0525170.1	-	K11001	phosphatidylinositol glycan anchor biosynthesis, class Y	-	lja00563	Glycosylphosphatidylinositol(GPI)-anchor biosynthesis	Metabolism	Glycan biosynthesis and metabolism
TRINITY_DN17972_c4_g6	sind:105163862	56.9	3.6e-08	-	peroxisome biogenesis protein 2 isoform X2	K06664	peroxin-2	-	sind04146	Peroxisome	Cellular Processes	Transport and catabolism
TRINITY_DN17977_c0_g1	hbr:110652937	55	8.3e-108	NA	NA	NA	NA	NA	NA	NA	NA	NA
TRINITY_DN17980_c0_g1	fve:101295808	88.7	3.2e-157	-	bifunctional dTDP-4-dehydrorhamnose 3	K12451	3,5-epimerase/4-reductase	EC:5.1.3.- 1.1.1.-	fve00520	Amino sugar and nucleotide sugar metabolism	Metabolism	Carbohydrate metabolism
TRINITY_DN17980_c0_g1	fve:101295808	88.7	3.2e-157	-	bifunctional dTDP-4-dehydrorhamnose 3	K12451	3,5-epimerase/4-reductase	EC:5.1.3.- 1.1.1.-	fve00523	Polyketide sugar unit biosynthesis	Metabolism	Metabolism of terpenoids and polyketides
TRINITY_DN17980_c0_g3	gmx:102661410	62.2	1.7e-09	-	UTP--glucose-1-phosphate uridylyltransferase-like	K00963	UTP--glucose-1-phosphate uridylyltransferase	EC:2.7.7.9	gmx00040	Pentose and glucuronate interconversions	Metabolism	Carbohydrate metabolism
TRINITY_DN17980_c0_g3	gmx:102661410	62.2	1.7e-09	-	UTP--glucose-1-phosphate uridylyltransferase-like	K00963	UTP--glucose-1-phosphate uridylyltransferase	EC:2.7.7.9	gmx00052	Galactose metabolism	Metabolism	Carbohydrate metabolism
TRINITY_DN17980_c0_g3	gmx:102661410	62.2	1.7e-09	-	UTP--glucose-1-phosphate uridylyltransferase-like	K00963	UTP--glucose-1-phosphate uridylyltransferase	EC:2.7.7.9	gmx00500	Starch and sucrose metabolism	Metabolism	Carbohydrate metabolism
TRINITY_DN17980_c0_g3	gmx:102661410	62.2	1.7e-09	-	UTP--glucose-1-phosphate uridylyltransferase-like	K00963	UTP--glucose-1-phosphate uridylyltransferase	EC:2.7.7.9	gmx00520	Amino sugar and nucleotide sugar metabolism	Metabolism	Carbohydrate metabolism
TRINITY_DN17980_c0_g5	ini:109152989	87.7	2.3e-157	-	bifunctional dTDP-4-dehydrorhamnose 3	K12451	3,5-epimerase/4-reductase	EC:5.1.3.- 1.1.1.-	ini00520	Amino sugar and nucleotide sugar metabolism	Metabolism	Carbohydrate metabolism
TRINITY_DN17980_c0_g5	ini:109152989	87.7	2.3e-157	-	bifunctional dTDP-4-dehydrorhamnose 3	K12451	3,5-epimerase/4-reductase	EC:5.1.3.- 1.1.1.-	ini00523	Polyketide sugar unit biosynthesis	Metabolism	Metabolism of terpenoids and polyketides
TRINITY_DN17981_c2_g1	vvi:100251971	69.5	3.1e-59	-	ferredoxin-3	K02639	ferredoxin	-	vvi00195	Photosynthesis	Metabolism	Energy metabolism
TRINITY_DN17981_c2_g2	nsy:104241527	74	1.2e-58	-	ferredoxin	K02639	ferredoxin	-	nsy00195	Photosynthesis	Metabolism	Energy metabolism
TRINITY_DN17982_c0_g5	mcha:111023593	52.2	5.9e-06	NA	NA	NA	NA	NA	NA	NA	NA	NA
TRINITY_DN17983_c1_g3	gra:105792874	99	1.4e-116	-	GTP-binding nuclear protein Ran-3	K07936	GTP-binding nuclear protein Ran	-	gra03013	RNA transport	Genetic Information Processing	Translation
TRINITY_DN17983_c1_g3	gra:105792874	99	1.4e-116	-	GTP-binding nuclear protein Ran-3	K07936	GTP-binding nuclear protein Ran	-	gra03008	Ribosome biogenesis in eukaryotes	Genetic Information Processing	Translation
TRINITY_DN17983_c1_g4	ath:AT5G20010	96.4	1.5e-62	RAN-1	RAS-related nuclear protein-1	K07936	GTP-binding nuclear protein Ran	-	ath03013	RNA transport	Genetic Information Processing	Translation
TRINITY_DN17983_c1_g4	ath:AT5G20010	96.4	1.5e-62	RAN-1	RAS-related nuclear protein-1	K07936	GTP-binding nuclear protein Ran	-	ath03008	Ribosome biogenesis in eukaryotes	Genetic Information Processing	Translation
TRINITY_DN17986_c0_g1	vvi:100256426	68.1	7.3e-44	-	7-dehydrocholesterol reductase	K00213	7-dehydrocholesterol reductase	EC:1.3.1.21	vvi00100	Steroid biosynthesis	Metabolism	Lipid metabolism
TRINITY_DN17988_c0_g2	osa:4337733	100	2.1e-234	-	S-adenosylmethionine synthase 1	K00789	S-adenosylmethionine synthetase	EC:2.5.1.6	osa00270	Cysteine and methionine metabolism	Metabolism	Amino acid metabolism
TRINITY_DN17988_c0_g3	brp:103859706	97.4	6.9e-62	-	S-adenosylmethionine synthase 2-like	K00789	S-adenosylmethionine synthetase	EC:2.5.1.6	brp00270	Cysteine and methionine metabolism	Metabolism	Amino acid metabolism
TRINITY_DN17988_c0_g5	vvi:100244176	99.3	1.2e-73	METK2	S-adenosylmethionine synthetase 2	K00789	S-adenosylmethionine synthetase	EC:2.5.1.6	vvi00270	Cysteine and methionine metabolism	Metabolism	Amino acid metabolism
TRINITY_DN17989_c0_g1	vvi:100262940	78.5	4.2e-256	-	EH domain-containing protein 1	K12483	EH domain-containing protein 1	-	vvi04144	Endocytosis	Cellular Processes	Transport and catabolism
TRINITY_DN17990_c0_g2	egr:104448545	87.4	1.3e-38	NA	NA	NA	NA	NA	NA	NA	NA	NA
TRINITY_DN17990_c0_g4	pxb:103936176	86.4	8e-233	-	glutamate-1-semialdehyde 2	K01845	glutamate-1-semialdehyde 2,1-aminomutase	EC:5.4.3.8	pxb00860	Porphyrin and chlorophyll metabolism	Metabolism	Metabolism of cofactors and vitamins
TRINITY_DN17991_c0_g2	aip:107609697	43.8	1.1e-59	-	cleavage stimulating factor 64	K14407	cleavage stimulation factor subunit 2	-	aip03015	mRNA surveillance pathway	Genetic Information Processing	Translation
TRINITY_DN18002_c0_g1	nta:107831428	75.4	1.8e-67	-	transcription initiation factor TFIID subunit 9-like	K03133	transcription initiation factor TFIID subunit 9B	-	nta03022	Basal transcription factors	Genetic Information Processing	Transcription
TRINITY_DN18002_c0_g3	nta:107823192	78.1	2.3e-241	CYP92A5	cytochrome P450 71A1-like	K20623	typhasterol/6-deoxotyphasterol 2alpha-hydroxylase	-	nta00905	Brassinosteroid biosynthesis	Metabolism	Metabolism of terpenoids and polyketides
TRINITY_DN18003_c2_g3	bvg:104906017	42.1	2e-186	NA	NA	NA	NA	NA	NA	NA	NA	NA
TRINITY_DN18003_c2_g4	nto:104120843	43.5	5.1e-172	NA	NA	NA	NA	NA	NA	NA	NA	NA
TRINITY_DN18007_c0_g1	gmx:100820024	96.1	4.3e-94	-	eukaryotic initiation factor 4A-15	K03257	translation initiation factor 4A	-	gmx03013	RNA transport	Genetic Information Processing	Translation
TRINITY_DN18008_c0_g1	sind:105170338	61.2	1.4e-74	NA	NA	NA	NA	NA	NA	NA	NA	NA
TRINITY_DN18008_c0_g2	mtr:MTR_8g091830	46.2	3.8e-14	NA	NA	NA	NA	NA	NA	NA	NA	NA
TRINITY_DN18008_c0_g4	cann:107853306	59.6	1.4e-11	NA	NA	NA	NA	NA	NA	NA	NA	NA
TRINITY_DN18008_c0_g5	han:110914447	60.9	4.5e-20	-	heat shock cognate 70 kDa protein-like	K03283	heat shock 70kDa protein 1/2/6/8	-	han03040	Spliceosome	Genetic Information Processing	Transcription
TRINITY_DN18008_c0_g5	han:110914447	60.9	4.5e-20	-	heat shock cognate 70 kDa protein-like	K03283	heat shock 70kDa protein 1/2/6/8	-	han04141	Protein processing in endoplasmic reticulum	Genetic Information Processing	Folding, sorting and degradation
TRINITY_DN18008_c0_g5	han:110914447	60.9	4.5e-20	-	heat shock cognate 70 kDa protein-like	K03283	heat shock 70kDa protein 1/2/6/8	-	han04144	Endocytosis	Cellular Processes	Transport and catabolism
TRINITY_DN18010_c0_g10	nta:107770865	61.6	2.9e-75	NA	NA	NA	NA	NA	NA	NA	NA	NA
TRINITY_DN18010_c0_g11	hbr:110670736	51.2	1.8e-37	NA	NA	NA	NA	NA	NA	NA	NA	NA
TRINITY_DN18010_c0_g8	nta:107770865	65.3	1.8e-86	NA	NA	NA	NA	NA	NA	NA	NA	NA
TRINITY_DN18012_c0_g1	hbr:110672175	62	3.9e-20	-	abscisate beta-glucosyltransferase-like	K14595	abscisate beta-glucosyltransferase	EC:2.4.1.263	hbr00906	Carotenoid biosynthesis	Metabolism	Metabolism of terpenoids and polyketides
TRINITY_DN18012_c0_g2	gmx:100798391	58.1	3.8e-62	-	scopoletin glucosyltransferase-like	K00699	glucuronosyltransferase	EC:2.4.1.17	gmx00040	Pentose and glucuronate interconversions	Metabolism	Carbohydrate metabolism
TRINITY_DN18012_c0_g2	gmx:100798391	58.1	3.8e-62	-	scopoletin glucosyltransferase-like	K00699	glucuronosyltransferase	EC:2.4.1.17	gmx00053	Ascorbate and aldarate metabolism	Metabolism	Carbohydrate metabolism
TRINITY_DN18012_c0_g2	gmx:100798391	58.1	3.8e-62	-	scopoletin glucosyltransferase-like	K00699	glucuronosyltransferase	EC:2.4.1.17	gmx00860	Porphyrin and chlorophyll metabolism	Metabolism	Metabolism of cofactors and vitamins
TRINITY_DN18012_c0_g3	sly:101266983	80.7	2.2e-163	NA	NA	NA	NA	NA	NA	NA	NA	NA
TRINITY_DN18012_c0_g5	nto:104087562	88.7	1.5e-178	NA	NA	NA	NA	NA	NA	NA	NA	NA
TRINITY_DN18014_c1_g1	soe:110801810	35.2	1.8e-13	NA	NA	NA	NA	NA	NA	NA	NA	NA
TRINITY_DN18014_c2_g1	nnu:104603646	44.1	1.7e-56	NA	NA	NA	NA	NA	NA	NA	NA	NA
TRINITY_DN18015_c1_g1	spen:107019943	65.3	6e-42	-	glutathione S-transferase U17-like	K00799	glutathione S-transferase	EC:2.5.1.18	spen00480	Glutathione metabolism	Metabolism	Metabolism of other amino acids
TRINITY_DN18016_c1_g2	han:110887011	83.9	2.7e-86	-	sucrose synthase	K00695	sucrose synthase	EC:2.4.1.13	han00500	Starch and sucrose metabolism	Metabolism	Carbohydrate metabolism
TRINITY_DN18016_c1_g4	cann:107864141	89.2	1.3e-77	-	proteasome subunit beta type-2-B	K02734	20S proteasome subunit beta 4	EC:3.4.25.1	cann03050	Proteasome	Genetic Information Processing	Folding, sorting and degradation
TRINITY_DN18018_c0_g3	cpap:110817833	52.8	7.6e-45	-	uncharacterized protein LOC110817833	K02960	small subunit ribosomal protein S16e	-	cpap03010	Ribosome	Genetic Information Processing	Translation
TRINITY_DN18018_c0_g4	mpp:MICPUCDRAFT_62891	23.6	1.2e-16	NA	NA	NA	NA	NA	NA	NA	NA	NA
TRINITY_DN18020_c2_g2	aly:ARALYDRAFT_328749	73.6	8.1e-36	NA	NA	NA	NA	NA	NA	NA	NA	NA
TRINITY_DN18021_c1_g1	sind:105173707	84.3	6.5e-186	NA	NA	NA	NA	NA	NA	NA	NA	NA
TRINITY_DN18022_c1_g4	sind:105175256	64	4.1e-160	-	heterogeneous nuclear ribonucleoprotein 1	K14411	RNA-binding protein Musashi	-	sind03015	mRNA surveillance pathway	Genetic Information Processing	Translation
TRINITY_DN18022_c1_g6	sind:105175256	58.9	3e-125	-	heterogeneous nuclear ribonucleoprotein 1	K14411	RNA-binding protein Musashi	-	sind03015	mRNA surveillance pathway	Genetic Information Processing	Translation
TRINITY_DN18023_c0_g2	pavi:110771159	53.4	5.6e-20	-	DNA polymerase epsilon subunit C	K03506	DNA polymerase epsilon subunit 4	EC:2.7.7.7	pavi00230	Purine metabolism	Metabolism	Nucleotide metabolism
TRINITY_DN18023_c0_g2	pavi:110771159	53.4	5.6e-20	-	DNA polymerase epsilon subunit C	K03506	DNA polymerase epsilon subunit 4	EC:2.7.7.7	pavi00240	Pyrimidine metabolism	Metabolism	Nucleotide metabolism
TRINITY_DN18023_c0_g2	pavi:110771159	53.4	5.6e-20	-	DNA polymerase epsilon subunit C	K03506	DNA polymerase epsilon subunit 4	EC:2.7.7.7	pavi03030	DNA replication	Genetic Information Processing	Replication and repair
TRINITY_DN18023_c0_g2	pavi:110771159	53.4	5.6e-20	-	DNA polymerase epsilon subunit C	K03506	DNA polymerase epsilon subunit 4	EC:2.7.7.7	pavi03410	Base excision repair	Genetic Information Processing	Replication and repair
TRINITY_DN18023_c0_g2	pavi:110771159	53.4	5.6e-20	-	DNA polymerase epsilon subunit C	K03506	DNA polymerase epsilon subunit 4	EC:2.7.7.7	pavi03420	Nucleotide excision repair	Genetic Information Processing	Replication and repair
TRINITY_DN18024_c1_g2	vvi:100258308	60.7	4.2e-301	-	WD repeat-containing protein 75	K14552	NET1-associated nuclear protein 1 (U3 small nucleolar RNA-associated protein 17)	-	vvi03008	Ribosome biogenesis in eukaryotes	Genetic Information Processing	Translation
TRINITY_DN18025_c1_g1	egu:105049690	31	3.4e-36	-	systemin receptor SR160-like	K13415	protein brassinosteroid insensitive 1	EC:2.7.10.1 2.7.11.1	egu04075	Plant hormone signal transduction	Environmental Information Processing	Signal transduction
TRINITY_DN18025_c1_g3	ccaj:109798921	33.1	2.1e-14	-	DELLA protein GAI-like	K14494	DELLA protein	-	ccaj04075	Plant hormone signal transduction	Environmental Information Processing	Signal transduction
TRINITY_DN18025_c1_g7	vra:106754827	30.6	5.2e-23	-	DELLA protein GAI1	K14494	DELLA protein	-	vra04075	Plant hormone signal transduction	Environmental Information Processing	Signal transduction
TRINITY_DN18026_c0_g1	vvi:100233099	48.4	2.6e-114	UFGT	anthocyanidin 3-O-glucosyltransferase 2	K12930	anthocyanidin 3-O-glucosyltransferase	EC:2.4.1.115	vvi00942	Anthocyanin biosynthesis	Metabolism	Biosynthesis of other secondary metabolites
TRINITY_DN18027_c1_g2	bvg:104889198	65.6	5.1e-146	-	delta(12)-fatty-acid desaturase FAD2	K10256	omega-6 fatty acid desaturase / acyl-lipid omega-6 desaturase (Delta-12 desaturase)	EC:1.14.19.6 1.14.19.22	bvg01040	Biosynthesis of unsaturated fatty acids	Metabolism	Lipid metabolism
TRINITY_DN18027_c1_g3	bvg:104889198	55	8.2e-32	-	delta(12)-fatty-acid desaturase FAD2	K10256	omega-6 fatty acid desaturase / acyl-lipid omega-6 desaturase (Delta-12 desaturase)	EC:1.14.19.6 1.14.19.22	bvg01040	Biosynthesis of unsaturated fatty acids	Metabolism	Lipid metabolism
TRINITY_DN18027_c1_g8	lang:109359068	33.1	3.2e-47	-	DELLA protein GAI-like	K14494	DELLA protein	-	lang04075	Plant hormone signal transduction	Environmental Information Processing	Signal transduction
TRINITY_DN18027_c1_g9	zju:107432351	61.7	5.1e-43	-	delta(12)-fatty-acid desaturase FAD2	K10256	omega-6 fatty acid desaturase / acyl-lipid omega-6 desaturase (Delta-12 desaturase)	EC:1.14.19.6 1.14.19.22	zju01040	Biosynthesis of unsaturated fatty acids	Metabolism	Lipid metabolism
TRINITY_DN18028_c1_g3	gmx:100800034	100	2.7e-32	-	ABC transporter B family member 4-like	K05658	ATP-binding cassette, subfamily B (MDR/TAP), member 1	EC:3.6.3.44	gmx02010	ABC transporters	Environmental Information Processing	Membrane transport
TRINITY_DN18029_c1_g6	tcc:18604829	63.7	1e-94	NA	NA	NA	NA	NA	NA	NA	NA	NA
TRINITY_DN18033_c0_g1	ini:109186090	72.7	7.7e-181	NA	NA	NA	NA	NA	NA	NA	NA	NA
TRINITY_DN18034_c1_g1	aly:ARALYDRAFT_312479	37.7	8.7e-34	-	F10B6.22	K00133	aspartate-semialdehyde dehydrogenase	EC:1.2.1.11	aly00260	Glycine, serine and threonine metabolism	Metabolism	Amino acid metabolism
TRINITY_DN18034_c1_g1	aly:ARALYDRAFT_312479	37.7	8.7e-34	-	F10B6.22	K00133	aspartate-semialdehyde dehydrogenase	EC:1.2.1.11	aly00270	Cysteine and methionine metabolism	Metabolism	Amino acid metabolism
TRINITY_DN18034_c1_g1	aly:ARALYDRAFT_312479	37.7	8.7e-34	-	F10B6.22	K00133	aspartate-semialdehyde dehydrogenase	EC:1.2.1.11	aly00300	Lysine biosynthesis	Metabolism	Amino acid metabolism
TRINITY_DN18034_c1_g1	aly:ARALYDRAFT_312479	37.7	8.7e-34	-	F10B6.22	K00133	aspartate-semialdehyde dehydrogenase	EC:1.2.1.11	aly00261	Monobactam biosynthesis	Metabolism	Biosynthesis of other secondary metabolites
TRINITY_DN18034_c1_g3	cpap:110813961	82.1	0	NA	NA	NA	NA	NA	NA	NA	NA	NA
TRINITY_DN18036_c1_g1	sind:105177370	84.4	4.4e-158	-	very-long-chain 3-oxoacyl-CoA reductase 1	K10251	17beta-estradiol 17-dehydrogenase / very-long-chain 3-oxoacyl-CoA reductase	EC:1.1.1.62 1.1.1.330	sind00062	Fatty acid elongation	Metabolism	Lipid metabolism
TRINITY_DN18036_c1_g1	sind:105177370	84.4	4.4e-158	-	very-long-chain 3-oxoacyl-CoA reductase 1	K10251	17beta-estradiol 17-dehydrogenase / very-long-chain 3-oxoacyl-CoA reductase	EC:1.1.1.62 1.1.1.330	sind01040	Biosynthesis of unsaturated fatty acids	Metabolism	Lipid metabolism
TRINITY_DN18036_c1_g3	nto:104087941	81.8	1e-82	-	very-long-chain 3-oxoacyl-CoA reductase 1	K10251	17beta-estradiol 17-dehydrogenase / very-long-chain 3-oxoacyl-CoA reductase	EC:1.1.1.62 1.1.1.330	nto00062	Fatty acid elongation	Metabolism	Lipid metabolism
TRINITY_DN18036_c1_g3	nto:104087941	81.8	1e-82	-	very-long-chain 3-oxoacyl-CoA reductase 1	K10251	17beta-estradiol 17-dehydrogenase / very-long-chain 3-oxoacyl-CoA reductase	EC:1.1.1.62 1.1.1.330	nto01040	Biosynthesis of unsaturated fatty acids	Metabolism	Lipid metabolism
TRINITY_DN18039_c0_g2	zju:107415090	83.8	9e-35	NA	NA	NA	NA	NA	NA	NA	NA	NA
TRINITY_DN18039_c0_g5	zju:107405230	64.4	1.3e-128	NA	NA	NA	NA	NA	NA	NA	NA	NA
TRINITY_DN18040_c0_g4	egr:104452874	59.8	8.7e-53	NA	NA	NA	NA	NA	NA	NA	NA	NA
TRINITY_DN18041_c0_g4	hbr:110640996	64.8	1.6e-69	NA	NA	NA	NA	NA	NA	NA	NA	NA
TRINITY_DN18042_c0_g1	cre:CHLREDRAFT_179706	62.6	8.1e-55	RPS7	ribosomal protein S7	K02993	small subunit ribosomal protein S7e	-	cre03010	Ribosome	Genetic Information Processing	Translation
TRINITY_DN18042_c0_g2	smo:SELMODRAFT_148446	66.9	1.8e-47	-	hypothetical protein	K02993	small subunit ribosomal protein S7e	-	smo03010	Ribosome	Genetic Information Processing	Translation
TRINITY_DN18045_c2_g2	egr:104441007	59.5	6.4e-25	-	eukaryotic translation initiation factor 3 subunit D	K03251	translation initiation factor 3 subunit D	-	egr03013	RNA transport	Genetic Information Processing	Translation
TRINITY_DN18045_c2_g3	sita:101776511	54.6	4.2e-43	-	eukaryotic translation initiation factor 3 subunit D	K03251	translation initiation factor 3 subunit D	-	sita03013	RNA transport	Genetic Information Processing	Translation
TRINITY_DN18047_c2_g2	mis:MICPUN_106749	80	2.2e-43	-	predicted protein	K04079	molecular chaperone HtpG	-	mis04141	Protein processing in endoplasmic reticulum	Genetic Information Processing	Folding, sorting and degradation
TRINITY_DN18047_c3_g2	spen:107005495	74.7	6.1e-69	NA	NA	NA	NA	NA	NA	NA	NA	NA
TRINITY_DN18047_c3_g5	vvi:100259155	51.9	1.1e-36	NA	NA	NA	NA	NA	NA	NA	NA	NA
TRINITY_DN18048_c0_g2	gsl:Gasu_42100	80.9	8.5e-28	-	tubulin	K07374	tubulin alpha	-	gsl04145	Phagosome	Cellular Processes	Transport and catabolism
TRINITY_DN18049_c0_g2	mtr:MTR_6g038240	42	1.8e-55	NA	NA	NA	NA	NA	NA	NA	NA	NA
TRINITY_DN18049_c0_g4	nnu:104586813	50.1	5e-132	NA	NA	NA	NA	NA	NA	NA	NA	NA
TRINITY_DN18049_c0_g5	vvi:109122547	39.9	6.4e-19	NA	NA	NA	NA	NA	NA	NA	NA	NA
TRINITY_DN18050_c0_g8	cann:107864179	72.8	1.6e-58	NA	NA	NA	NA	NA	NA	NA	NA	NA
TRINITY_DN18050_c0_g9	ota:OT_ostta03g04650	55.6	5.9e-42	NA	NA	NA	NA	NA	NA	NA	NA	NA
TRINITY_DN18052_c0_g1	egu:105055644	70.4	8.2e-37	NA	NA	NA	NA	NA	NA	NA	NA	NA
TRINITY_DN18054_c0_g1	hbr:110636047	77.3	5.1e-116	-	acyl-protein thioesterase 2-like isoform X1	K06130	lysophospholipase II	EC:3.1.1.5	hbr00564	Glycerophospholipid metabolism	Metabolism	Lipid metabolism
TRINITY_DN18054_c0_g3	obr:102711038	40.3	2.2e-69	-	alpha-glucosidase 2-like	K01228	mannosyl-oligosaccharide glucosidase	EC:3.2.1.106	obr00510	N-Glycan biosynthesis	Metabolism	Glycan biosynthesis and metabolism
TRINITY_DN18054_c0_g3	obr:102711038	40.3	2.2e-69	-	alpha-glucosidase 2-like	K01228	mannosyl-oligosaccharide glucosidase	EC:3.2.1.106	obr04141	Protein processing in endoplasmic reticulum	Genetic Information Processing	Folding, sorting and degradation
TRINITY_DN18057_c0_g6	nnu:104605839	78.6	3.2e-22	-	farnesylcysteine lyase-like	K05906	prenylcysteine oxidase / farnesylcysteine lyase	EC:1.8.3.5 1.8.3.6	nnu00900	Terpenoid backbone biosynthesis	Metabolism	Metabolism of terpenoids and polyketides
TRINITY_DN18057_c0_g7	vvi:100268071	71.8	2.2e-161	-	farnesylcysteine lyase	K05906	prenylcysteine oxidase / farnesylcysteine lyase	EC:1.8.3.5 1.8.3.6	vvi00900	Terpenoid backbone biosynthesis	Metabolism	Metabolism of terpenoids and polyketides
TRINITY_DN18058_c0_g1	sind:105161939	80.3	6.9e-159	-	methylthioribose-1-phosphate isomerase	K08963	methylthioribose-1-phosphate isomerase	EC:5.3.1.23	sind00270	Cysteine and methionine metabolism	Metabolism	Amino acid metabolism
TRINITY_DN18059_c0_g1	fve:105350310	26.2	9.8e-28	-	DEAD-box ATP-dependent RNA helicase 21-like	K12858	ATP-dependent RNA helicase DDX23/PRP28	EC:3.6.4.13	fve03040	Spliceosome	Genetic Information Processing	Transcription
TRINITY_DN18060_c0_g1	vvi:100249401	76	2.2e-235	-	non-lysosomal glucosylceramidase	K17108	non-lysosomal glucosylceramidase	EC:3.2.1.45	vvi00600	Sphingolipid metabolism	Metabolism	Lipid metabolism
TRINITY_DN18060_c0_g1	vvi:100249401	76	2.2e-235	-	non-lysosomal glucosylceramidase	K17108	non-lysosomal glucosylceramidase	EC:3.2.1.45	vvi00511	Other glycan degradation	Metabolism	Glycan biosynthesis and metabolism
TRINITY_DN18060_c0_g2	cit:102614613	85.3	5.7e-116	-	non-lysosomal glucosylceramidase isoform X1	K17108	non-lysosomal glucosylceramidase	EC:3.2.1.45	cit00600	Sphingolipid metabolism	Metabolism	Lipid metabolism
TRINITY_DN18060_c0_g2	cit:102614613	85.3	5.7e-116	-	non-lysosomal glucosylceramidase isoform X1	K17108	non-lysosomal glucosylceramidase	EC:3.2.1.45	cit00511	Other glycan degradation	Metabolism	Glycan biosynthesis and metabolism
TRINITY_DN18060_c0_g4	nta:107777099	75.6	4.3e-86	-	non-lysosomal glucosylceramidase-like	K17108	non-lysosomal glucosylceramidase	EC:3.2.1.45	nta00600	Sphingolipid metabolism	Metabolism	Lipid metabolism
TRINITY_DN18060_c0_g4	nta:107777099	75.6	4.3e-86	-	non-lysosomal glucosylceramidase-like	K17108	non-lysosomal glucosylceramidase	EC:3.2.1.45	nta00511	Other glycan degradation	Metabolism	Glycan biosynthesis and metabolism
TRINITY_DN18061_c0_g2	obr:102707197	23.1	4.9e-13	-	phosphoinositide phosphatase SAC8	K21797	phosphatidylinositol 4-phosphatase	EC:3.1.3.-	obr00562	Inositol phosphate metabolism	Metabolism	Carbohydrate metabolism
TRINITY_DN18061_c0_g2	obr:102707197	23.1	4.9e-13	-	phosphoinositide phosphatase SAC8	K21797	phosphatidylinositol 4-phosphatase	EC:3.1.3.-	obr04070	Phosphatidylinositol signaling system	Environmental Information Processing	Signal transduction
TRINITY_DN18062_c0_g1	sind:105156857	71.1	1.1e-32	-	two-component response regulator ARR2 isoform X1	K14491	two-component response regulator ARR-B family	-	sind04075	Plant hormone signal transduction	Environmental Information Processing	Signal transduction
TRINITY_DN18064_c0_g1	osa:4343445	55.5	2.1e-32	-	protein translation factor SUI1 homolog	K03113	translation initiation factor 1	-	osa03013	RNA transport	Genetic Information Processing	Translation
TRINITY_DN18065_c1_g2	nta:107777591	55.7	2.4e-15	NA	NA	NA	NA	NA	NA	NA	NA	NA
TRINITY_DN18067_c0_g1	bna:106425271	45.1	1.1e-39	-	phosphatidylinositol-3-phosphatase myotubularin-2-like	K18081	myotubularin-related protein 1/2	EC:3.1.3.64 3.1.3.95	bna00562	Inositol phosphate metabolism	Metabolism	Carbohydrate metabolism
TRINITY_DN18067_c0_g1	bna:106425271	45.1	1.1e-39	-	phosphatidylinositol-3-phosphatase myotubularin-2-like	K18081	myotubularin-related protein 1/2	EC:3.1.3.64 3.1.3.95	bna04070	Phosphatidylinositol signaling system	Environmental Information Processing	Signal transduction
TRINITY_DN18067_c0_g2	hbr:110634660	27.1	7.9e-15	-	pectinesterase-like	K01051	pectinesterase	EC:3.1.1.11	hbr00040	Pentose and glucuronate interconversions	Metabolism	Carbohydrate metabolism
TRINITY_DN18067_c0_g4	bna:111208244	50.3	1.9e-44	-	phosphatidylinositol-3-phosphatase myotubularin-2-like	K18081	myotubularin-related protein 1/2	EC:3.1.3.64 3.1.3.95	bna00562	Inositol phosphate metabolism	Metabolism	Carbohydrate metabolism
TRINITY_DN18067_c0_g4	bna:111208244	50.3	1.9e-44	-	phosphatidylinositol-3-phosphatase myotubularin-2-like	K18081	myotubularin-related protein 1/2	EC:3.1.3.64 3.1.3.95	bna04070	Phosphatidylinositol signaling system	Environmental Information Processing	Signal transduction
TRINITY_DN18067_c0_g5	bna:111208244	48.2	1.9e-38	-	phosphatidylinositol-3-phosphatase myotubularin-2-like	K18081	myotubularin-related protein 1/2	EC:3.1.3.64 3.1.3.95	bna00562	Inositol phosphate metabolism	Metabolism	Carbohydrate metabolism
TRINITY_DN18067_c0_g5	bna:111208244	48.2	1.9e-38	-	phosphatidylinositol-3-phosphatase myotubularin-2-like	K18081	myotubularin-related protein 1/2	EC:3.1.3.64 3.1.3.95	bna04070	Phosphatidylinositol signaling system	Environmental Information Processing	Signal transduction
TRINITY_DN18068_c0_g1	sind:105166296	84.9	5.6e-218	NA	NA	NA	NA	NA	NA	NA	NA	NA
TRINITY_DN18069_c1_g2	cit:102631031	88	1.1e-36	-	ras-related protein RABE1c-like	K07901	Ras-related protein Rab-8A	-	cit04144	Endocytosis	Cellular Processes	Transport and catabolism
TRINITY_DN18069_c2_g3	ccaj:109796296	28.9	3.3e-14	NA	NA	NA	NA	NA	NA	NA	NA	NA
TRINITY_DN18071_c1_g2	smo:SELMODRAFT_270363	80	9.8e-12	-	hypothetical protein	K02129	F-type H+-transporting ATPase subunit e	-	smo00190	Oxidative phosphorylation	Metabolism	Energy metabolism
TRINITY_DN18072_c0_g2	tcc:18613382	95.6	2.5e-30	-	small nuclear ribonucleoprotein Sm D1	K11087	small nuclear ribonucleoprotein D1	-	tcc03040	Spliceosome	Genetic Information Processing	Transcription
TRINITY_DN18072_c1_g1	gmx:100820062	71.4	1.6e-64	NA	NA	NA	NA	NA	NA	NA	NA	NA
TRINITY_DN18072_c1_g7	zju:107423349	98	7.4e-49	-	small nuclear ribonucleoprotein Sm D1-like	K11087	small nuclear ribonucleoprotein D1	-	zju03040	Spliceosome	Genetic Information Processing	Transcription
TRINITY_DN18072_c1_g8	sind:105167533	66.1	8.1e-13	-	uncharacterized protein LOC105167533	K12191	charged multivesicular body protein 2A	-	sind04144	Endocytosis	Cellular Processes	Transport and catabolism
TRINITY_DN18073_c0_g3	gmx:100777770	98.5	4.6e-229	-	S-adenosylmethionine synthase 1	K00789	S-adenosylmethionine synthetase	EC:2.5.1.6	gmx00270	Cysteine and methionine metabolism	Metabolism	Amino acid metabolism
TRINITY_DN18073_c0_g7	cpap:110808295	96.7	1.6e-27	-	S-adenosylmethionine synthase 2	K00789	S-adenosylmethionine synthetase	EC:2.5.1.6	cpap00270	Cysteine and methionine metabolism	Metabolism	Amino acid metabolism
TRINITY_DN18074_c3_g3	gmx:547967	100	6.8e-21	NA	NA	NA	NA	NA	NA	NA	NA	NA
TRINITY_DN18075_c1_g1	thj:104822348	42.8	1.4e-50	NA	NA	NA	NA	NA	NA	NA	NA	NA
TRINITY_DN18078_c2_g3	cann:107839710	33.5	1.1e-11	-	nucleolar protein 56-like	K14564	nucleolar protein 56	-	cann03008	Ribosome biogenesis in eukaryotes	Genetic Information Processing	Translation
TRINITY_DN18078_c2_g4	sind:105166694	42.7	3.5e-28	-	mediator of RNA polymerase II transcription subunit 36a	K14563	rRNA 2'-O-methyltransferase fibrillarin	EC:2.1.1.-	sind03008	Ribosome biogenesis in eukaryotes	Genetic Information Processing	Translation
TRINITY_DN18080_c0_g2	csat:104711840	42.4	2e-62	-	LOW QUALITY PROTEIN: beta-galactosidase 2	K12309	beta-galactosidase	EC:3.2.1.23	csat00052	Galactose metabolism	Metabolism	Carbohydrate metabolism
TRINITY_DN18080_c0_g2	csat:104711840	42.4	2e-62	-	LOW QUALITY PROTEIN: beta-galactosidase 2	K12309	beta-galactosidase	EC:3.2.1.23	csat00600	Sphingolipid metabolism	Metabolism	Lipid metabolism
TRINITY_DN18080_c0_g2	csat:104711840	42.4	2e-62	-	LOW QUALITY PROTEIN: beta-galactosidase 2	K12309	beta-galactosidase	EC:3.2.1.23	csat00531	Glycosaminoglycan degradation	Metabolism	Glycan biosynthesis and metabolism
TRINITY_DN18080_c0_g2	csat:104711840	42.4	2e-62	-	LOW QUALITY PROTEIN: beta-galactosidase 2	K12309	beta-galactosidase	EC:3.2.1.23	csat00604	Glycosphingolipid biosynthesis - ganglio series	Metabolism	Glycan biosynthesis and metabolism
TRINITY_DN18080_c0_g2	csat:104711840	42.4	2e-62	-	LOW QUALITY PROTEIN: beta-galactosidase 2	K12309	beta-galactosidase	EC:3.2.1.23	csat00511	Other glycan degradation	Metabolism	Glycan biosynthesis and metabolism
TRINITY_DN18082_c3_g4	cpap:110822059	47	6.7e-49	-	ATP-dependent 6-phosphofructokinase 6-like	K00850	6-phosphofructokinase 1	EC:2.7.1.11	cpap00010	Glycolysis / Gluconeogenesis	Metabolism	Carbohydrate metabolism
TRINITY_DN18082_c3_g4	cpap:110822059	47	6.7e-49	-	ATP-dependent 6-phosphofructokinase 6-like	K00850	6-phosphofructokinase 1	EC:2.7.1.11	cpap00030	Pentose phosphate pathway	Metabolism	Carbohydrate metabolism
TRINITY_DN18082_c3_g4	cpap:110822059	47	6.7e-49	-	ATP-dependent 6-phosphofructokinase 6-like	K00850	6-phosphofructokinase 1	EC:2.7.1.11	cpap00051	Fructose and mannose metabolism	Metabolism	Carbohydrate metabolism
TRINITY_DN18082_c3_g4	cpap:110822059	47	6.7e-49	-	ATP-dependent 6-phosphofructokinase 6-like	K00850	6-phosphofructokinase 1	EC:2.7.1.11	cpap00052	Galactose metabolism	Metabolism	Carbohydrate metabolism
TRINITY_DN18082_c3_g4	cpap:110822059	47	6.7e-49	-	ATP-dependent 6-phosphofructokinase 6-like	K00850	6-phosphofructokinase 1	EC:2.7.1.11	cpap03018	RNA degradation	Genetic Information Processing	Folding, sorting and degradation
TRINITY_DN18082_c3_g6	cpap:110822059	54.2	1.9e-24	-	ATP-dependent 6-phosphofructokinase 6-like	K00850	6-phosphofructokinase 1	EC:2.7.1.11	cpap00010	Glycolysis / Gluconeogenesis	Metabolism	Carbohydrate metabolism
TRINITY_DN18082_c3_g6	cpap:110822059	54.2	1.9e-24	-	ATP-dependent 6-phosphofructokinase 6-like	K00850	6-phosphofructokinase 1	EC:2.7.1.11	cpap00030	Pentose phosphate pathway	Metabolism	Carbohydrate metabolism
TRINITY_DN18082_c3_g6	cpap:110822059	54.2	1.9e-24	-	ATP-dependent 6-phosphofructokinase 6-like	K00850	6-phosphofructokinase 1	EC:2.7.1.11	cpap00051	Fructose and mannose metabolism	Metabolism	Carbohydrate metabolism
TRINITY_DN18082_c3_g6	cpap:110822059	54.2	1.9e-24	-	ATP-dependent 6-phosphofructokinase 6-like	K00850	6-phosphofructokinase 1	EC:2.7.1.11	cpap00052	Galactose metabolism	Metabolism	Carbohydrate metabolism
TRINITY_DN18082_c3_g6	cpap:110822059	54.2	1.9e-24	-	ATP-dependent 6-phosphofructokinase 6-like	K00850	6-phosphofructokinase 1	EC:2.7.1.11	cpap03018	RNA degradation	Genetic Information Processing	Folding, sorting and degradation
TRINITY_DN18083_c1_g1	aly:ARALYDRAFT_326902	33.3	3.5e-38	NA	NA	NA	NA	NA	NA	NA	NA	NA
TRINITY_DN18087_c1_g2	ini:109153335	92.5	2.3e-101	NA	NA	NA	NA	NA	NA	NA	NA	NA
TRINITY_DN18089_c2_g1	boe:106315405	49.3	4.4e-11	-	protein QUIRKY-like	K00549	5-methyltetrahydropteroyltriglutamate--homocysteine methyltransferase	EC:2.1.1.14	boe00270	Cysteine and methionine metabolism	Metabolism	Amino acid metabolism
TRINITY_DN18089_c2_g1	boe:106315405	49.3	4.4e-11	-	protein QUIRKY-like	K00549	5-methyltetrahydropteroyltriglutamate--homocysteine methyltransferase	EC:2.1.1.14	boe00450	Selenocompound metabolism	Metabolism	Metabolism of other amino acids
TRINITY_DN18091_c2_g4	lja:Lj3g3v0323160.1	62	3.8e-50	Lj3g3v0323160.1	-	K12309	beta-galactosidase	EC:3.2.1.23	lja00052	Galactose metabolism	Metabolism	Carbohydrate metabolism
TRINITY_DN18091_c2_g4	lja:Lj3g3v0323160.1	62	3.8e-50	Lj3g3v0323160.1	-	K12309	beta-galactosidase	EC:3.2.1.23	lja00600	Sphingolipid metabolism	Metabolism	Lipid metabolism
TRINITY_DN18091_c2_g4	lja:Lj3g3v0323160.1	62	3.8e-50	Lj3g3v0323160.1	-	K12309	beta-galactosidase	EC:3.2.1.23	lja00531	Glycosaminoglycan degradation	Metabolism	Glycan biosynthesis and metabolism
TRINITY_DN18091_c2_g4	lja:Lj3g3v0323160.1	62	3.8e-50	Lj3g3v0323160.1	-	K12309	beta-galactosidase	EC:3.2.1.23	lja00604	Glycosphingolipid biosynthesis - ganglio series	Metabolism	Glycan biosynthesis and metabolism
TRINITY_DN18091_c2_g4	lja:Lj3g3v0323160.1	62	3.8e-50	Lj3g3v0323160.1	-	K12309	beta-galactosidase	EC:3.2.1.23	lja00511	Other glycan degradation	Metabolism	Glycan biosynthesis and metabolism
TRINITY_DN18092_c0_g1	nta:107831427	85.3	1.1e-91	NA	NA	NA	NA	NA	NA	NA	NA	NA
TRINITY_DN18094_c0_g1	cann:107870339	38.7	1.4e-82	-	uncharacterized LOC107870339	K10643	CCR4-NOT transcription complex subunit 4	EC:2.3.2.27	cann03018	RNA degradation	Genetic Information Processing	Folding, sorting and degradation
TRINITY_DN18094_c0_g5	sind:105171100	54.4	3.9e-46	-	auxin-responsive protein SAUR36-like	K14488	SAUR family protein	-	sind04075	Plant hormone signal transduction	Environmental Information Processing	Signal transduction
TRINITY_DN18094_c0_g6	smo:SELMODRAFT_439638	38.6	7.6e-18	NA	NA	NA	NA	NA	NA	NA	NA	NA
TRINITY_DN18095_c0_g1	aip:107642431	54.3	4.8e-17	-	SH3 domain-containing protein 1	K11247	endophilin-A	-	aip04144	Endocytosis	Cellular Processes	Transport and catabolism
TRINITY_DN18097_c1_g5	zju:107422614	77.5	1.3e-69	-	protein transport protein Sec24-like At4g32640	K14007	protein transport protein SEC24	-	zju04141	Protein processing in endoplasmic reticulum	Genetic Information Processing	Folding, sorting and degradation
TRINITY_DN18098_c1_g1	nta:107826276	91.8	1.5e-16	-	autophagy-related protein 8f	K08341	GABA(A) receptor-associated protein	-	nta04136	Autophagy - other eukaryotes	Cellular Processes	Transport and catabolism
TRINITY_DN18098_c1_g2	csat:104699045	83.3	1.5e-42	-	autophagy-related protein 8d-like	K08341	GABA(A) receptor-associated protein	-	csat04136	Autophagy - other eukaryotes	Cellular Processes	Transport and catabolism
TRINITY_DN18099_c0_g1	hbr:110666860	55	9.5e-09	-	3-isopropylmalate dehydrogenase 2	K00052	3-isopropylmalate dehydrogenase	EC:1.1.1.85	hbr00660	C5-Branched dibasic acid metabolism	Metabolism	Carbohydrate metabolism
TRINITY_DN18099_c0_g1	hbr:110666860	55	9.5e-09	-	3-isopropylmalate dehydrogenase 2	K00052	3-isopropylmalate dehydrogenase	EC:1.1.1.85	hbr00290	Valine, leucine and isoleucine biosynthesis	Metabolism	Amino acid metabolism
TRINITY_DN18100_c0_g5	cann:107847622	94.5	1.4e-53	-	pyruvate dehydrogenase E1 component subunit alpha	K00161	pyruvate dehydrogenase E1 component alpha subunit	EC:1.2.4.1	cann00010	Glycolysis / Gluconeogenesis	Metabolism	Carbohydrate metabolism
TRINITY_DN18100_c0_g5	cann:107847622	94.5	1.4e-53	-	pyruvate dehydrogenase E1 component subunit alpha	K00161	pyruvate dehydrogenase E1 component alpha subunit	EC:1.2.4.1	cann00020	Citrate cycle (TCA cycle)	Metabolism	Carbohydrate metabolism
TRINITY_DN18100_c0_g5	cann:107847622	94.5	1.4e-53	-	pyruvate dehydrogenase E1 component subunit alpha	K00161	pyruvate dehydrogenase E1 component alpha subunit	EC:1.2.4.1	cann00620	Pyruvate metabolism	Metabolism	Carbohydrate metabolism
TRINITY_DN18102_c0_g3	sind:105177203	90.8	8.9e-104	NA	NA	NA	NA	NA	NA	NA	NA	NA
TRINITY_DN18104_c1_g2	aip:107640400	54.8	3.1e-21	NA	NA	NA	NA	NA	NA	NA	NA	NA
TRINITY_DN18104_c1_g3	soe:110805090	31.6	1.2e-17	-	cinnamoyl-CoA reductase 1-like	K09753	cinnamoyl-CoA reductase	EC:1.2.1.44	soe00940	Phenylpropanoid biosynthesis	Metabolism	Biosynthesis of other secondary metabolites
TRINITY_DN18104_c1_g4	ghi:107928423	84.7	2.6e-97	-	1	K08967	1,2-dihydroxy-3-keto-5-methylthiopentene dioxygenase	EC:1.13.11.53 1.13.11.54	ghi00270	Cysteine and methionine metabolism	Metabolism	Amino acid metabolism
TRINITY_DN18105_c0_g1	nnu:104605375	79.5	4.7e-58	NA	NA	NA	NA	NA	NA	NA	NA	NA
TRINITY_DN18105_c0_g2	nnu:104605375	85	1.3e-54	NA	NA	NA	NA	NA	NA	NA	NA	NA
TRINITY_DN18109_c0_g4	mus:103973391	34.7	5.8e-59	NA	NA	NA	NA	NA	NA	NA	NA	NA
TRINITY_DN18110_c0_g3	hbr:110670695	51.4	3.6e-13	NA	NA	NA	NA	NA	NA	NA	NA	NA
TRINITY_DN18111_c0_g1	gmx:547579	100	2.2e-127	GSTU30	glutathione S-transferase GST 8	K00799	glutathione S-transferase	EC:2.5.1.18	gmx00480	Glutathione metabolism	Metabolism	Metabolism of other amino acids
TRINITY_DN18112_c0_g1	thj:104808371	51.4	2.8e-13	-	uncharacterized protein LOC104808371	K12447	UDP-sugar pyrophosphorylase	EC:2.7.7.64	thj00040	Pentose and glucuronate interconversions	Metabolism	Carbohydrate metabolism
TRINITY_DN18112_c0_g1	thj:104808371	51.4	2.8e-13	-	uncharacterized protein LOC104808371	K12447	UDP-sugar pyrophosphorylase	EC:2.7.7.64	thj00052	Galactose metabolism	Metabolism	Carbohydrate metabolism
TRINITY_DN18112_c0_g1	thj:104808371	51.4	2.8e-13	-	uncharacterized protein LOC104808371	K12447	UDP-sugar pyrophosphorylase	EC:2.7.7.64	thj00053	Ascorbate and aldarate metabolism	Metabolism	Carbohydrate metabolism
TRINITY_DN18112_c0_g1	thj:104808371	51.4	2.8e-13	-	uncharacterized protein LOC104808371	K12447	UDP-sugar pyrophosphorylase	EC:2.7.7.64	thj00520	Amino sugar and nucleotide sugar metabolism	Metabolism	Carbohydrate metabolism
TRINITY_DN18112_c2_g2	gra:105790614	88.5	1.4e-25	NA	NA	NA	NA	NA	NA	NA	NA	NA
TRINITY_DN18112_c3_g1	egr:104441953	94.9	1.2e-102	NA	NA	NA	NA	NA	NA	NA	NA	NA
TRINITY_DN18112_c4_g1	soe:110777154	60.7	2.6e-34	NA	NA	NA	NA	NA	NA	NA	NA	NA
TRINITY_DN18113_c0_g1	aip:107640400	88.5	7.4e-24	NA	NA	NA	NA	NA	NA	NA	NA	NA
TRINITY_DN18113_c0_g2	aip:107640400	84.3	1.2e-22	NA	NA	NA	NA	NA	NA	NA	NA	NA
TRINITY_DN18113_c0_g3	csat:104726841	81.5	2.1e-23	-	cyclic dof factor 1-like	K16222	Dof zinc finger protein DOF5.5	-	csat04712	Circadian rhythm - plant	Organismal Systems	Environmental adaptation
TRINITY_DN18113_c0_g6	ini:109188887	82	1.1e-245	NA	NA	NA	NA	NA	NA	NA	NA	NA
TRINITY_DN18116_c0_g1	egu:105035334	46.8	0	NA	NA	NA	NA	NA	NA	NA	NA	NA
TRINITY_DN18117_c0_g2	lang:109335560	54.3	1.6e-13	-	5-methyltetrahydropteroyltriglutamate--homocysteine methyltransferase-like	K00549	5-methyltetrahydropteroyltriglutamate--homocysteine methyltransferase	EC:2.1.1.14	lang00270	Cysteine and methionine metabolism	Metabolism	Amino acid metabolism
TRINITY_DN18117_c0_g2	lang:109335560	54.3	1.6e-13	-	5-methyltetrahydropteroyltriglutamate--homocysteine methyltransferase-like	K00549	5-methyltetrahydropteroyltriglutamate--homocysteine methyltransferase	EC:2.1.1.14	lang00450	Selenocompound metabolism	Metabolism	Metabolism of other amino acids
TRINITY_DN18118_c0_g2	tcc:18594172	97.3	9.5e-34	-	ubiquitin-conjugating enzyme E2 36	K10580	ubiquitin-conjugating enzyme E2 N	EC:2.3.2.23	tcc04120	Ubiquitin mediated proteolysis	Genetic Information Processing	Folding, sorting and degradation
TRINITY_DN18119_c0_g1	cit:102618695	77.8	4.6e-173	NA	NA	NA	NA	NA	NA	NA	NA	NA
TRINITY_DN18119_c0_g3	gra:105770912	63.6	2e-73	NA	NA	NA	NA	NA	NA	NA	NA	NA
TRINITY_DN18119_c0_g5	cann:107867841	83.3	4.1e-06	NA	NA	NA	NA	NA	NA	NA	NA	NA
TRINITY_DN18120_c1_g1	cpap:110820267	47.4	6.7e-16	NA	NA	NA	NA	NA	NA	NA	NA	NA
TRINITY_DN18120_c2_g1	nta:107813400	89.6	1.4e-95	NA	NA	NA	NA	NA	NA	NA	NA	NA
TRINITY_DN18120_c2_g2	mtr:MTR_1g022345	41.4	2.7e-08	NA	NA	NA	NA	NA	NA	NA	NA	NA
TRINITY_DN18121_c0_g1	vvi:100242063	72.1	2.2e-118	-	THO complex subunit 5B	K13174	THO complex subunit 5	-	vvi03013	RNA transport	Genetic Information Processing	Translation
TRINITY_DN18123_c0_g1	ini:109188927	76.4	5.8e-168	-	spermine synthase-like	K00797	spermidine synthase	EC:2.5.1.16	ini00270	Cysteine and methionine metabolism	Metabolism	Amino acid metabolism
TRINITY_DN18123_c0_g1	ini:109188927	76.4	5.8e-168	-	spermine synthase-like	K00797	spermidine synthase	EC:2.5.1.16	ini00330	Arginine and proline metabolism	Metabolism	Amino acid metabolism
TRINITY_DN18123_c0_g1	ini:109188927	76.4	5.8e-168	-	spermine synthase-like	K00797	spermidine synthase	EC:2.5.1.16	ini00410	beta-Alanine metabolism	Metabolism	Metabolism of other amino acids
TRINITY_DN18123_c0_g1	ini:109188927	76.4	5.8e-168	-	spermine synthase-like	K00797	spermidine synthase	EC:2.5.1.16	ini00480	Glutathione metabolism	Metabolism	Metabolism of other amino acids
TRINITY_DN18125_c3_g13	gmx:100799037	64.6	7e-11	-	peroxisomal (S)-2-hydroxy-acid oxidase GLO5-like	K11517	(S)-2-hydroxy-acid oxidase	EC:1.1.3.15	gmx00630	Glyoxylate and dicarboxylate metabolism	Metabolism	Carbohydrate metabolism
TRINITY_DN18125_c3_g13	gmx:100799037	64.6	7e-11	-	peroxisomal (S)-2-hydroxy-acid oxidase GLO5-like	K11517	(S)-2-hydroxy-acid oxidase	EC:1.1.3.15	gmx04146	Peroxisome	Cellular Processes	Transport and catabolism
TRINITY_DN18129_c0_g3	bdi:100821236	49	1.5e-07	-	DNA mismatch repair protein MSH6	K08737	DNA mismatch repair protein MSH6	-	bdi03430	Mismatch repair	Genetic Information Processing	Replication and repair
TRINITY_DN18132_c1_g1	nsy:104248696	77.9	1.6e-94	NA	NA	NA	NA	NA	NA	NA	NA	NA
TRINITY_DN18136_c2_g1	sind:105165840	75.7	1.3e-145	NA	NA	NA	NA	NA	NA	NA	NA	NA
TRINITY_DN18138_c0_g1	nta:107819193	89.7	4e-14	-	acyl-protein thioesterase 1-like	K06130	lysophospholipase II	EC:3.1.1.5	nta00564	Glycerophospholipid metabolism	Metabolism	Lipid metabolism
TRINITY_DN18138_c0_g2	nta:107819193	89.7	4.3e-14	-	acyl-protein thioesterase 1-like	K06130	lysophospholipase II	EC:3.1.1.5	nta00564	Glycerophospholipid metabolism	Metabolism	Lipid metabolism
TRINITY_DN18139_c0_g1	sita:101754620	93.5	6.8e-47	-	ubiquitin-conjugating enzyme E2 7 isoform X1	K10575	ubiquitin-conjugating enzyme E2 G1	EC:2.3.2.23	sita04141	Protein processing in endoplasmic reticulum	Genetic Information Processing	Folding, sorting and degradation
TRINITY_DN18139_c0_g1	sita:101754620	93.5	6.8e-47	-	ubiquitin-conjugating enzyme E2 7 isoform X1	K10575	ubiquitin-conjugating enzyme E2 G1	EC:2.3.2.23	sita04120	Ubiquitin mediated proteolysis	Genetic Information Processing	Folding, sorting and degradation
TRINITY_DN18139_c0_g2	sind:105167470	46.8	6.3e-145	NA	NA	NA	NA	NA	NA	NA	NA	NA
TRINITY_DN18140_c0_g1	vvi:100262660	85.8	1.8e-57	-	argininosuccinate lyase	K01755	argininosuccinate lyase	EC:4.3.2.1	vvi00250	Alanine, aspartate and glutamate metabolism	Metabolism	Amino acid metabolism
TRINITY_DN18140_c0_g1	vvi:100262660	85.8	1.8e-57	-	argininosuccinate lyase	K01755	argininosuccinate lyase	EC:4.3.2.1	vvi00220	Arginine biosynthesis	Metabolism	Amino acid metabolism
TRINITY_DN18140_c0_g5	han:110885560	74.3	9.2e-83	NA	NA	NA	NA	NA	NA	NA	NA	NA
TRINITY_DN18141_c1_g1	olu:OSTLU_87987	30.3	3.3e-12	-	predicted protein	K14570	RNA exonuclease 1	EC:3.1.-.-	olu03008	Ribosome biogenesis in eukaryotes	Genetic Information Processing	Translation
TRINITY_DN18143_c1_g4	jcu:105648458	82.5	6.4e-171	NA	NA	NA	NA	NA	NA	NA	NA	NA
TRINITY_DN18150_c0_g1	sind:105160421	80.7	5.1e-78	-	probable NADH dehydrogenase [ubiquinone] 1 alpha subcomplex subunit 5	K03949	NADH dehydrogenase (ubiquinone) 1 alpha subcomplex subunit 5	-	sind00190	Oxidative phosphorylation	Metabolism	Energy metabolism
TRINITY_DN18150_c0_g2	jcu:105639310	34.7	3.7e-47	-	flavonol synthase/flavanone 3-hydroxylase	K05278	flavonol synthase	EC:1.14.20.6	jcu00941	Flavonoid biosynthesis	Metabolism	Biosynthesis of other secondary metabolites
TRINITY_DN18150_c0_g3	sind:105166710	83.3	6.1e-79	-	probable NADH dehydrogenase [ubiquinone] 1 alpha subcomplex subunit 5	K03949	NADH dehydrogenase (ubiquinone) 1 alpha subcomplex subunit 5	-	sind00190	Oxidative phosphorylation	Metabolism	Energy metabolism
TRINITY_DN18150_c0_g4	egu:105046210	44.6	4.3e-34	NA	NA	NA	NA	NA	NA	NA	NA	NA
TRINITY_DN18150_c0_g9	han:110912820	83.4	3.2e-79	-	probable NADH dehydrogenase [ubiquinone] 1 alpha subcomplex subunit 5	K03949	NADH dehydrogenase (ubiquinone) 1 alpha subcomplex subunit 5	-	han00190	Oxidative phosphorylation	Metabolism	Energy metabolism
TRINITY_DN18153_c2_g2	ini:109185417	70.2	1.4e-80	NA	NA	NA	NA	NA	NA	NA	NA	NA
TRINITY_DN18154_c1_g4	mtr:MTR_1g101870	72.3	2.8e-10	-	elongation factor 1-alpha	K03231	elongation factor 1-alpha	-	mtr03013	RNA transport	Genetic Information Processing	Translation
TRINITY_DN18155_c0_g1	lang:109338841	74	2.7e-146	NA	NA	NA	NA	NA	NA	NA	NA	NA
TRINITY_DN18156_c0_g1	vvi:100251424	78.8	4.2e-185	NA	NA	NA	NA	NA	NA	NA	NA	NA
TRINITY_DN18157_c1_g2	pper:18787089	80.3	3.2e-66	-	LOW QUALITY PROTEIN: eukaryotic translation initiation factor 5B	K03243	translation initiation factor 5B	-	pper03013	RNA transport	Genetic Information Processing	Translation
TRINITY_DN18159_c1_g1	nsy:104228692	90.6	1.2e-51	-	40S ribosomal protein S10-like	K02947	small subunit ribosomal protein S10e	-	nsy03010	Ribosome	Genetic Information Processing	Translation
TRINITY_DN18160_c0_g2	han:110940512	72.2	9.1e-121	NA	NA	NA	NA	NA	NA	NA	NA	NA
TRINITY_DN18160_c0_g4	pper:18782169	71	5.5e-66	NA	NA	NA	NA	NA	NA	NA	NA	NA
TRINITY_DN18161_c0_g4	sind:105172291	56.1	9.8e-41	-	DNA-directed RNA polymerases II and V subunit 8A	K03016	DNA-directed RNA polymerases I, II, and III subunit RPABC3	-	sind00230	Purine metabolism	Metabolism	Nucleotide metabolism
TRINITY_DN18161_c0_g4	sind:105172291	56.1	9.8e-41	-	DNA-directed RNA polymerases II and V subunit 8A	K03016	DNA-directed RNA polymerases I, II, and III subunit RPABC3	-	sind00240	Pyrimidine metabolism	Metabolism	Nucleotide metabolism
TRINITY_DN18161_c0_g4	sind:105172291	56.1	9.8e-41	-	DNA-directed RNA polymerases II and V subunit 8A	K03016	DNA-directed RNA polymerases I, II, and III subunit RPABC3	-	sind03020	RNA polymerase	Genetic Information Processing	Transcription
TRINITY_DN18161_c0_g8	nnu:104611846	81	1e-132	NA	NA	NA	NA	NA	NA	NA	NA	NA
TRINITY_DN18163_c0_g1	mcha:111013579	94.6	1.4e-63	-	cell division cycle protein 48 homolog	K13525	transitional endoplasmic reticulum ATPase	-	mcha04141	Protein processing in endoplasmic reticulum	Genetic Information Processing	Folding, sorting and degradation
TRINITY_DN18163_c0_g2	gmx:100791603	99.3	5.3e-150	-	cell division cycle protein 48 homolog	K13525	transitional endoplasmic reticulum ATPase	-	gmx04141	Protein processing in endoplasmic reticulum	Genetic Information Processing	Folding, sorting and degradation
TRINITY_DN18163_c0_g3	pavi:110746715	68.7	2.1e-128	NA	NA	NA	NA	NA	NA	NA	NA	NA
TRINITY_DN18163_c0_g6	eus:EUTSA_v10020085mg	98.2	3.5e-191	-	hypothetical protein	K13525	transitional endoplasmic reticulum ATPase	-	eus04141	Protein processing in endoplasmic reticulum	Genetic Information Processing	Folding, sorting and degradation
TRINITY_DN18163_c0_g7	gsl:Gasu_41710	70.8	1.9e-17	-	AAA-type ATPase	K13525	transitional endoplasmic reticulum ATPase	-	gsl04141	Protein processing in endoplasmic reticulum	Genetic Information Processing	Folding, sorting and degradation
[truncated: 17,118 more rows]
